# Supplementary material for: Deletion of type VIII collagen reduces blood pressure, increases carotid artery functional distensibility and promotes elastin deposition
Source: PubMed Central journal article supplement — Matrix Biol Plus. 2021 Sep 29;12:100085. doi: 10.1016/j.mbplus.2021.100085 (PMC8517381; doi:10.1016/j.mbplus.2021.100085), 2021-09-29
Supplement: mmc1.pdf [file mmc1.pdf]

**Supplemental Table S1A: Non-imputed dataset of 2353 total proteins identified by LC-MS/MS. LFQ**

| <b>Gene names</b> | <b>Log2(LFQ Col8/-_1)</b> | <b>Log2(LFQ Col8/-_2)</b> | <b>Log2(LFQ Col8/-_3)</b> | <b>Log2(LFQ Col8/-_4)</b> |
|-------------------|---------------------------|---------------------------|---------------------------|---------------------------|
| A2m               | 30.1752                   | 29.559                    | 29.9348                   | 29.6048                   |
| Aars              | 24.8954                   | 24.8772                   | 25.2221                   | 25.3941                   |
| Aarsd1            | nd                        | 19.4085                   | nd                        | nd                        |
| Abat              | 24.1729                   | 24.6979                   | 24.1034                   | 24.6238                   |
| Abca8b            | nd                        | 21.6086                   | 22.1675                   | 23.0636                   |
| Abcc9             | 22.9182                   | 22.7197                   | 22.9011                   | 23.0511                   |
| Abcd3             | 23.1275                   | 23.7077                   | 23.5201                   | 23.2551                   |
| Abce1             | 23.2046                   | 22.8244                   | 23.4336                   | 23.0576                   |
| Abcf1             | 21.1929                   | 21.8441                   | 21.3061                   | 21.8376                   |
| Abhd11            | 23.9318                   | 24.2601                   | 23.9116                   | 23.9168                   |
| Abhd12            | 24.2133                   | 24.171                    | 24.5714                   | 24.9026                   |
| Abhd14b           | 25.3643                   | 25.2582                   | 25.2334                   | 25.6966                   |
| Abhd16a           | 24.4433                   | 24.5962                   | 24.8626                   | 24.8759                   |
| Abhd5             | 24.0924                   | 23.6917                   | 23.851                    | nd                        |
| Abi1              | nd                        | nd                        | 22.7955                   | 23.1557                   |
| Ablim1            | nd                        | 22.5933                   | 22.3511                   | 22.5767                   |
| Abrac1            | 25.2887                   | 25.4188                   | 25.4379                   | 25.6657                   |
| Acaa1a            | 25.7271                   | 25.9769                   | 25.6175                   | 26.1708                   |
| Acaa2             | 29.8939                   | 30.2476                   | 29.1503                   | 28.6866                   |
| Acaca             | 25.1661                   | 25.6275                   | 25.1302                   | 24.3431                   |
| Acad10            | 22.4294                   | 22.2961                   | 22.3229                   | 22.3916                   |
| Acad9             | 23.9717                   | 24.1245                   | 23.4846                   | 23.7214                   |
| Acad1             | 29.1822                   | 29.283                    | 28.4522                   | 27.7478                   |
| Acadm             | 29.1581                   | 29.4424                   | 28.4932                   | 27.9838                   |
| Acads             | 27.633                    | 27.7423                   | 26.9259                   | 27.0642                   |
| Acadsb            | 25.8605                   | 25.7516                   | 25.2978                   | 25.1316                   |
| Acadv1            | 28.7889                   | 28.9891                   | 28.003                    | 27.7605                   |
| Acan              | 27.4975                   | 27.3155                   | 27.3675                   | 27.6376                   |
| Acat1             | 29.2883                   | 29.2424                   | 29.0791                   | 28.7377                   |
| Acat2             | 25.157                    | 25.2786                   | 25.0351                   | 25.2797                   |
| Ace               | 29.1336                   | 29.1193                   | 28.9622                   | 28.9756                   |
| Acin1             | 23.1154                   | 23.1509                   | 22.8627                   | nd                        |
| Acly              | 27.8934                   | 28.549                    | 28.1572                   | 27.9335                   |
| Aco1              | 26.7273                   | 26.8351                   | 26.6058                   | 26.7807                   |
| Aco2              | 30.5392                   | 30.7951                   | 29.9355                   | 29.3591                   |
| Acot11            | 22.8002                   | 23.4769                   | 22.8871                   | 23.1366                   |
| Acot13            | 23.9328                   | 24.5359                   | 23.4303                   | 23.8882                   |
| Acot2             | 25.2379                   | 25.6122                   | 25.173                    | 25.4665                   |

|          |         |         |         |         |
|----------|---------|---------|---------|---------|
| Acot7    | 22.5036 | 22.4322 | 23.5554 | 22.8631 |
| Acot9    | 26.3442 | 26.6539 | 26.5806 | 26.8289 |
| Acp1     | 25.1476 | 25.1225 | 24.5553 | 24.9565 |
| Acsf2    | 21.9765 | 22.7564 | 22.5203 | nd      |
| Acsf3    | nd      | 20.7799 | 19.8333 | 20.2676 |
| Acsl1    | 28.7009 | 28.7755 | 28.1801 | 27.8699 |
| Acsl5    | 20.6712 | 20.826  | nd      | 21.2246 |
| Acta2    | 32.2293 | 32.3105 | 32.3541 | 32.3972 |
| Actb     | 28.1235 | 27.2797 | 28.0111 | 27.4807 |
| Actc1    | 35.3517 | 35.4051 | 35.5034 | 35.6436 |
| Actg1    | 33.4716 | 33.5517 | 33.6036 | 33.697  |
| Actl6a   | 22.0076 | 23.2178 | 23.1137 | 22.8818 |
| Actn1    | 32.1333 | 32.0753 | 32.2614 | 32.1761 |
| Actn4    | 29.3428 | 29.1207 | 29.4464 | 29.3833 |
| Actr10   | 22.6744 | 23.2463 | 24.137  | 23.4383 |
| Actr1a   | 24.6573 | 24.7953 | 24.6276 | 24.6918 |
| Actr1b   | 27.1291 | 27.0086 | 26.7455 | 27.287  |
| Actr2    | 28.0307 | 28.2783 | 28.2064 | 28.5662 |
| Actr3    | 29.4646 | 29.4822 | 29.4432 | 29.6869 |
| Acyp1    | 24.0346 | 24.1324 | 23.5352 | 23.7576 |
| Adam10   | 20.9909 | 20.832  | 21.7814 | nd      |
| Adamtsl4 | 23.0404 | 23.4197 | 22.8806 | nd      |
| Adck3    | 24.7816 | 24.8412 | 24.0156 | 24.3846 |
| Adcy5    | 25.1151 | 25.3154 | 25.0662 | 25.2961 |
| Adcy7    | 21.8312 | 21.7722 | 21.3995 | 21.5772 |
| Add1     | 26.0907 | 26.2557 | 26.2817 | 26.4599 |
| Add3     | 23.5544 | 23.1158 | 23.6431 | 23.7807 |
| Adh1     | 24.9122 | 24.9943 | 24.6579 | 24.5069 |
| Adh5     | 26.7493 | 26.9765 | 26.7667 | 26.6326 |
| Adh7     | 23.2828 | 24.0233 | 22.7063 | 22.6083 |
| Adipoq   | 24.7611 | 25.1717 | 25.3228 | 25.2444 |
| Adk      | 25.9558 | 25.9671 | 25.0993 | 25.4246 |
| Adpgk    | 21.5303 | 21.653  | 21.9474 | 21.4988 |
| Adrbk2   | 21.8575 | 21.97   | nd      | 22.6006 |
| Adrm1    | 21.2983 | 21.2327 | nd      | 21.3426 |
| Adsl     | 25.5445 | 25.6031 | 25.3941 | 25.8418 |
| Adssl1   | 22.5507 | 22.1655 | 22.4975 | 22.0997 |
| Aebp1    | 28.496  | 28.4728 | 28.386  | 28.3564 |
| Afg3l2   | 22.5985 | 22.5209 | 22.4825 | 22.7487 |
| Afm      | 20.9349 | 20.5984 | 20.4689 | nd      |
| Ag2      | 22.4193 | 22.5876 | 22.7016 | 22.744  |

|          |         |         |         |         |
|----------|---------|---------|---------|---------|
| Aga      | 23.0756 | 23.0495 | nd      | 23.0226 |
| Agk      | 23.6569 | 23.5899 | nd      | 24.2326 |
| Ago2     | 23.2255 | 23.159  | 24.0998 | nd      |
| Agpat2   | 22.5467 | 22.6401 | 22.3284 | 22.3925 |
| Agrn     | 25.4268 | 25.0267 | 25.5367 | 25.1603 |
| Ahcy     | 26.097  | 26.5129 | 26.7538 | 26.4008 |
| Ahcyl1   | 23.4257 | 23.8669 | 23.7032 | 23.3464 |
| Ahsa1    | 23.4751 | 24.2455 | 24.1614 | 24.3468 |
| Ahsg     | 29.9038 | 29.3416 | 29.8871 | 29.3405 |
| Aifm1    | 24.8434 | 25.0092 | 24.3705 | 24.6249 |
| Aifm2    | nd      | 22.721  | 22.5038 | 23.1465 |
| Aimp1    | 24.6508 | 24.9309 | 24.6981 | 25.3186 |
| Aimp2    | 23.5371 | 24.2266 | 23.6238 | 24.0792 |
| Aip      | nd      | 22.9557 | 23.0835 | 23.7303 |
| Ak1      | 27.2541 | 27.4925 | 27.3903 | 27.5611 |
| Ak2      | 26.9152 | 27.1178 | 26.5502 | 26.5633 |
| Ak3      | 27.2277 | 27.1264 | 27.203  | 27.0941 |
| Akap12   | 25.6637 | 25.7655 | 25.9759 | 26.302  |
| Akr1a1   | 26.9854 | 26.9374 | 27.1676 | 27.1736 |
| Akr1b1   | 27.8389 | 27.8535 | 27.8289 | 27.9028 |
| Akr1b7   | 23.7476 | 24.0439 | 23.7042 | 23.8549 |
| Akr1b8   | 25.6174 | 25.7712 | 25.0752 | 25.4913 |
| Akr7a2   | 24.7111 | 24.9336 | 24.4083 | 24.7534 |
| Akt1s1   | 21.5846 | 22.0041 | 22.1987 | 22.0075 |
| Alad     | 23.3153 | 22.6089 | 22.5909 | 23.3867 |
| Alb      | 34.4405 | 33.8773 | 34.3818 | 33.7432 |
| Alcam    | 24.2494 | 24.7919 | 24.3688 | 24.8937 |
| Aldh16a1 | 19.9669 | 20.4931 | 20.4868 | 20.5496 |
| Aldh18a1 | 21.6641 | nd      | 22.0717 | 22.4599 |
| Aldh1a1  | 24.0058 | 23.2409 | 24.8615 | 23.808  |
| Aldh1l2  | nd      | 23.0054 | 22.22   | 23.2221 |
| Aldh2    | 30.659  | 30.6586 | 30.6484 | 30.6428 |
| Aldh3a2  | 25.6607 | 25.921  | 26.0268 | 26.0192 |
| Aldh4a1  | 24.6385 | 24.5091 | 24.6407 | 23.6609 |
| Aldh5a1  | 21.9334 | 22.2127 | 22.485  | 21.9135 |
| Aldh6a1  | 28.0805 | 28.2507 | 27.7409 | 28.198  |
| Aldh7a1  | 26.6641 | 26.7622 | 26.6974 | 26.8351 |
| Aldh9a1  | 25.396  | 25.8089 | 25.4639 | 25.6745 |
| Aldoa    | 29.396  | 29.5782 | 29.5903 | 29.3249 |
| Alg2     | 21.7334 | 22.2653 | 21.7033 | 21.5984 |
| Alox5ap  | 20.7815 | 20.5632 | 20.953  | 21.5061 |

|         |         |         |         |         |
|---------|---------|---------|---------|---------|
| Alyref  | 24.112  | 24.0839 | 24.3457 | 23.9057 |
| Anapc1  | 21.9553 | 23.2871 | 22.0025 | 22.4804 |
| Ank1    | 27.5746 | 26.8979 | 26.8829 | 27.2591 |
| Ank2    | 23.2498 | 23.0724 | 23.4256 | 23.2808 |
| Ankfy1  | 22.2082 | 20.856  | 20.1898 | 20.3993 |
| Ano10   | 24.9412 | 24.1157 | 24.1341 | 24.4127 |
| Ano6    | 25.0869 | 24.8524 | 24.9743 | 25.2248 |
| Anp32a  | 25.2273 | 25.2045 | 24.886  | 25.3085 |
| Anp32b  | 24.7351 | 24.9559 | 24.9203 | 24.8617 |
| Anp32e  | 24.9522 | 25.2586 | 25.0307 | 25.0583 |
| Anpep   | 28.3732 | 28.4575 | 28.523  | 28.6589 |
| Anxa1   | 29.5096 | 29.3725 | 29.5996 | 29.5716 |
| Anxa11  | 27.6339 | 27.7199 | 27.6344 | 27.7751 |
| Anxa2   | 32.1176 | 32.074  | 32.1666 | 32.1908 |
| Anxa3   | 28.4236 | 28.3567 | 28.3406 | 28.5661 |
| Anxa4   | 27.447  | 27.4587 | 27.3796 | 27.4926 |
| Anxa5   | 30.8485 | 30.9007 | 30.9265 | 31.0247 |
| Anxa6   | 31.2408 | 31.2843 | 31.3773 | 31.3697 |
| Anxa7   | 27.564  | 27.5327 | 27.707  | 27.6204 |
| Aoc3    | 31.618  | 31.7334 | 31.6208 | 31.8085 |
| Aox1    | 23.145  | 23.4283 | 23.1684 | 23.4349 |
| Ap1b1   | 24.6374 | 24.5938 | 24.4974 | 24.3637 |
| Ap1g1   | 22.5566 | 23.0401 | 22.5599 | 23.2162 |
| Ap2a1   | 26.9328 | 27.0726 | 26.9147 | 27.1978 |
| Ap2a2   | 27.8178 | 28.0632 | 27.8766 | 28.2188 |
| Ap2b1   | 27.7677 | 27.8997 | 27.8339 | 28.1539 |
| Ap2m1   | 26.5721 | 26.7098 | 26.615  | 26.5734 |
| Ap2s1   | 24.5052 | 24.8878 | 24.0598 | 24.8542 |
| Ap3b1   | 23.6229 | 24.0261 | 23.7187 | 24.3391 |
| Ap3d1   | 22.6922 | 22.8012 | 22.6395 | 22.655  |
| Apeh    | 22.5081 | 23.1074 | 22.1278 | nd      |
| Apex1   | 23.6935 | 23.7678 | 22.3247 | 23.7322 |
| Api5    | 24.211  | 24.1602 | 23.9997 | 24.4405 |
| Apmap   | 22.6961 | 23.5647 | 23.4012 | nd      |
| Apoa1   | 29.3463 | 28.2736 | 29.1358 | 27.9359 |
| Apoa1bp | 26.8283 | 26.9141 | 27.0591 | 26.8448 |
| Apoa2   | 26.2228 | 25.3488 | 25.4857 | 25.0248 |
| Apoa4   | 27.5782 | 27.033  | 27.1622 | 26.6409 |
| Apoc1   | 25.2844 | 24.1987 | 24.4463 | 24.1278 |
| Apoc2   | 24.2407 | 23.8917 | 23.9983 | nd      |
| Apoe    | 25.5957 | 24.9617 | 25.5049 | 25.2336 |

|          |         |         |         |         |
|----------|---------|---------|---------|---------|
| Apoh     | 27.2354 | 26.996  | 27.2145 | 27.4177 |
| Apoo     | 22.8894 | 23.0221 | 22.3987 | 21.9841 |
| Apool    | 24.0111 | 24.6733 | 23.9559 | 24.6353 |
| App      | 23.5427 | 23.0557 | 24.2743 | 23.7959 |
| Appl1    | 24.3621 | 24.2257 | 24.2478 | 24.0697 |
| Aprt     | 24.8819 | 24.9952 | 24.7988 | 25.2716 |
| Aqp1     | 25.179  | 26.1737 | 26.1293 | 25.4376 |
| Arcn1    | 24.8447 | 24.8443 | 25.3633 | 25.0026 |
| Arf1     | 27.3432 | 27.4795 | 27.2278 | 27.3242 |
| Arf2     | 21.336  | 21.5131 | 21.8188 | 21.834  |
| Arf4     | 25.9005 | 26.5658 | 25.8138 | 26.1247 |
| Arf5     | 23.0945 | 23.0273 | 23.1405 | 23.3995 |
| Arf6     | 22.2065 | 22.9054 | 21.9585 | 21.6762 |
| Arfgef2  | 20.7249 | 20.5828 | 20.7233 | 20.8847 |
| Arhgap1  | 26.3223 | 26.4232 | 26.3444 | 26.5144 |
| Arhgap17 | 22.8588 | 23.6912 | 23.4847 | 23.5453 |
| Arhgap32 | nd      | 27.5667 | 27.6439 | 27.7396 |
| Arhgdia  | 28.4365 | 28.246  | 28.5054 | 28.2637 |
| Arhgdib  | 23.6383 | 23.5575 | 23.8286 | 23.8412 |
| Arhgef2  | 23.4331 | 23.6948 | 23.6412 | 23.4143 |
| Arhgef7  | nd      | nd      | 20.5206 | 23.6506 |
| Arl1     | 23.7391 | 23.8675 | 23.8886 | 23.7933 |
| Arl3     | 24.8875 | 25.1383 | 25.0869 | 25.3497 |
| Arl6ip1  | 21.7702 | 22.5243 | 22.7671 | 22.4728 |
| Arl6ip5  | 25.8359 | 25.6994 | 25.8462 | 25.6352 |
| Arl8b    | 24.9368 | 25.1337 | 25.0129 | 25.0425 |
| Armc1    | 23.6739 | 23.9911 | 23.8856 | 24.1018 |
| Arpc1b   | 28.1638 | 28.6387 | 28.1676 | 28.6415 |
| Arpc2    | 27.5393 | 27.5237 | 27.2444 | 27.3    |
| Arpc3    | 27.6892 | 27.6502 | 27.7476 | 27.7027 |
| Arpc4    | 28.1781 | 28.3226 | 28.2759 | 28.3632 |
| Arpc5    | 25.4409 | 25.3139 | 25.4167 | 25.6393 |
| Arpc5l   | 24.4519 | 24.6024 | 24.3975 | 24.808  |
| Asah1    | 24.9262 | 25.0518 | 25.255  | 25.5356 |
| Asl      | 23.7195 | 23.4996 | 23.5138 | 22.8293 |
| Asna1    | 22.8874 | 23.9892 | 23.51   | 24.1793 |
| Asph     | 25.8424 | 25.9418 | 26.2537 | 26.1352 |
| Aspn     | 31.6034 | 31.4279 | 31.6737 | 31.7264 |
| Asrgl1   | nd      | 21.9573 | nd      | 22.3016 |
| Atad3    | 22.0006 | 22.3746 | 21.9066 | 21.846  |
| Atg5     | 23.1448 | 23.0663 | 22.9767 | 23.2558 |

|          |         |         |         |         |
|----------|---------|---------|---------|---------|
| Atg7     | 22.0534 | 22.6157 | 21.8834 | 23.0463 |
| Atic     | 27.3204 | 27.3572 | 27.3558 | 27.5497 |
| Atl2     | nd      | nd      | 22.9641 | 22.8876 |
| Atl3     | 27.8955 | 27.9936 | 27.9275 | 28.1247 |
| Atox1    | 26.0855 | 25.7931 | 26.2529 | 25.7494 |
| Atp1a1   | 27.3161 | 27.4109 | 27.6549 | 27.448  |
| Atp1a2   | 25.2944 | 25.5516 | 25.5828 | 25.5876 |
| Atp1b1   | 25.0576 | 24.8612 | 26.1128 | 25.0461 |
| Atp1b3   | 24.9346 | 25.0007 | 25.6169 | 25.5533 |
| Atp2a2   | 27.4449 | 27.5533 | 27.5881 | 27.6985 |
| Atp2a3   | 23.4052 | 23.5916 | 23.7498 | 23.8586 |
| Atp2b1   | 21.59   | 22.2582 | 21.8894 | 22.3612 |
| Atp2b4   | 26.2183 | 26.342  | 26.2248 | 26.4233 |
| Atp5a1   | 30.5964 | 30.6268 | 30.6234 | 30.6553 |
| Atp5b    | 31.4074 | 31.5303 | 31.4524 | 31.4934 |
| Atp5c1   | 27.0859 | 27.0437 | 26.939  | 26.9252 |
| Atp5f1   | 27.6821 | 27.7029 | 27.7998 | 27.5744 |
| Atp5h    | 27.3095 | 27.3332 | 27.3468 | 27.2577 |
| Atp5i    | 24.6568 | 24.9619 | 24.7662 | 24.8644 |
| Atp5j    | 23.5011 | 23.0632 | 23.8461 | nd      |
| Atp5j2   | 26.4477 | 26.5853 | 26.663  | 26.6479 |
| Atp5l    | 26.0169 | 26.0928 | 25.7066 | 25.9404 |
| Atp5o    | 28.7074 | 28.9054 | 29.0192 | 29.1675 |
| Atp6v0a1 | nd      | 21.4444 | 21.9656 | 21.895  |
| Atp6v0d1 | 23.2966 | 24.0164 | 25.1365 | 24.0811 |
| Atp6v1a  | 24.7774 | 25.3451 | 25.4836 | 25.2669 |
| Atp6v1b2 | 19.9057 | 21.0677 | 21.5668 | 21.0695 |
| Atp6v1e1 | 22.2246 | 23.3689 | 23.2679 | 23.7131 |
| Atxn10   | 22.578  | nd      | 21.8249 | 22.685  |
| Auh      | 22.9827 | 22.9772 | 22.3465 | nd      |
| Axl      | 22.3523 | 23.1219 | 23.3283 | 23.1675 |
| B2m      | 24.6023 | 24.3414 | 24.5157 | 24.781  |
| B4galt2  | nd      | 22.5578 | nd      | 22.7718 |
| Bag3     | 24.9019 | 24.922  | 25.4851 | 24.953  |
| Bag5     | 21.7116 | 21.8917 | nd      | 22.3358 |
| Bag6     | 23.5882 | 23.481  | 23.5716 | 23.7356 |
| Banf1    | 27.871  | 28.0003 | 27.8623 | 28.1097 |
| Bax      | 22.8554 | 22.802  | 22.9075 | 22.895  |
| Bcam     | 28.4205 | 28.2401 | 28.4763 | 28.3776 |
| Bcar1    | 20.9784 | 21.0401 | 20.5596 | 20.8881 |
| Bcas3    | 21.1653 | 21.2926 | 21.3375 | 21.4897 |

|          |         |         |         |         |
|----------|---------|---------|---------|---------|
| Bcat2    | 26.3646 | 26.2781 | 26.4687 | 26.2157 |
| Bckdha   | 23.8314 | 24.2124 | 23.7166 | 23.4394 |
| Bckdhb   | 25.1392 | 24.0824 | 22.9602 | 23.7035 |
| Bckdk    | 21.8447 | 22.0799 | 21.3911 | 21.8349 |
| Bgn      | 32.015  | 32.0087 | 32.169  | 32.3331 |
| Blmh     | 24.9304 | 25.1297 | 24.8944 | 25.0416 |
| Blvra    | 24.5892 | 25.0071 | 24.5391 | 25.2772 |
| Blvrb    | 25.4616 | 25.366  | 25.5338 | 25.2029 |
| Bpgm     | 21.7943 | nd      | nd      | nd      |
| Bphl     | 24.9822 | 25.2496 | 24.4659 | 25.3717 |
| Bpnt1    | 23.9722 | 24.1418 | 24.1195 | 24.7358 |
| Bre      | nd      | nd      | 21.5842 | 22.6111 |
| Brox     | 22.5215 | 22.5746 | 22.056  | 22.3382 |
| Btf3     | 20.7482 | 21.5196 | 21.3287 | 21.675  |
| Btk      | 19.4096 | 20.3401 | 19.3846 | 19.4761 |
| Bzrap1   | 23.5026 | 22.5598 | 23.525  | 23.9704 |
| C1qbp    | 24.8175 | 24.2598 | 25.1668 | 24.4817 |
| C3       | 28.1113 | 27.7374 | 27.8614 | 27.6713 |
| C4b      | 27.216  | 27.0349 | 27.4368 | 27.3532 |
| C4bpa    | 25.9294 | 25.3336 | 25.4142 | 25.9558 |
| C5       | 22.845  | 22.143  | 22.4594 | 22.6315 |
| C9       | 21.885  | 21.2466 | 21.8287 | 21.5699 |
| Ca1      | 24.5888 | 23.4928 | 24.3222 | 23.2359 |
| Ca2      | 28.3315 | 26.9383 | 28.1064 | 26.8368 |
| Ca3      | 29.8541 | 29.4637 | 29.3158 | 28.043  |
| Cab39    | 25.2782 | 25.4254 | 25.4115 | 25.3614 |
| Cacna2d1 | 27.2156 | 27.2383 | 27.4332 | 27.3925 |
| Cacybp   | 22.2317 | 21.6918 | 22.2882 | 22.2276 |
| Cad      | 21.8245 | 22.6983 | 22.3922 | 22.8771 |
| Calm3    | 27.4212 | 26.7925 | 27.2124 | 26.6808 |
| Calr     | 27.6475 | 27.486  | 27.8634 | 27.4258 |
| Calu     | 24.0442 | 24.192  | 23.3464 | 24.0355 |
| Camk1    | 23.0696 | 23.3065 | 23.008  | 23.189  |
| Camk2d   | 27.3636 | 27.5349 | 27.5024 | 27.6554 |
| Camk2g   | 26.0118 | 26.2546 | 26.2153 | 26.4327 |
| Camlg    | 21.3211 | 22.0586 | 21.1439 | 22.1536 |
| Cand1    | 28.1231 | 28.3342 | 28.0728 | 28.1311 |
| Canx     | 28.209  | 28.3025 | 28.433  | 28.1349 |
| Cap1     | 30.3074 | 30.4552 | 30.3297 | 30.5248 |
| Cap2     | 26.6617 | 26.8606 | 26.7932 | 26.867  |
| Capg     | 25.3364 | 25.5545 | 25.7462 | 25.8847 |

|         |         |         |         |         |
|---------|---------|---------|---------|---------|
| Capn1   | 24.0336 | 24.5184 | 24.4503 | 24.9168 |
| Capn2   | 28.4593 | 28.64   | 28.2867 | 28.8878 |
| Capns1  | 28.282  | 28.6307 | 28.2562 | 28.8006 |
| Caprin1 | 21.8135 | 21.9042 | 22.0228 | 21.9358 |
| Capza1  | 25.1928 | 25.4487 | 25.26   | 25.2852 |
| Capza2  | 27.5386 | 27.639  | 27.8766 | 27.686  |
| Capzb   | 27.3511 | 27.1803 | 27.2653 | 27.1372 |
| Carhsp1 | 24.485  | 24.3363 | 24.2942 | 24.6775 |
| Carkd   | 25.5365 | 25.6839 | 25.7626 | 25.597  |
| Carkd   | 21.9305 | 21.7424 | 22.2726 | 22.671  |
| Carm1   | 21.6133 | 21.6715 | 21.3335 | 22.2112 |
| Cars    | 20.5226 | nd      | 20.3763 | nd      |
| Casp8   | 21.1768 | 21.403  | nd      | 21.196  |
| Casq1   | 27.3305 | 28.2085 | 27.9646 | 28.0709 |
| Cast    | 24.4628 | 24.2356 | 24.6393 | 24.5571 |
| Cat     | 24.9465 | 24.7753 | 25.3488 | 24.8141 |
| Cav1    | 29.2687 | 29.2742 | 29.4469 | 29.1513 |
| Cav2    | 25.9361 | 25.7233 | 25.7743 | 25.7403 |
| Cbr1    | 26.1024 | 26.1939 | 26.1509 | 26.0917 |
| Cbr2    | 29.3423 | 29.4751 | 29.3886 | 29.5481 |
| Cbr3    | 23.4269 | 23.9965 | 23.309  | 23.9939 |
| Ccar1   | 21.8233 | 21.6887 | 22.1063 | 22.5046 |
| Ccar2   | 22.0162 | 22.2568 | nd      | 22.4429 |
| Ccbl2   | 22.6835 | 22.6566 | 22.6465 | 22.3558 |
| Ccdc127 | nd      | 21.9734 | nd      | 22.1829 |
| Ccdc47  | 24.3079 | 24.7445 | 24.186  | 25.1065 |
| Ccdc80  | 24.0021 | 24.4889 | 24.3711 | 24.632  |
| Ccdc90b | 24.9876 | 25.4939 | 24.8401 | 25.5206 |
| Ccny    | 21.2292 | 22.1469 | 20.9829 | 22.6099 |
| Cct2    | 27.7895 | 28.0053 | 27.9522 | 28.2409 |
| Cct3    | 27.3177 | 27.5275 | 27.134  | 27.4235 |
| Cct4    | 26.5956 | 26.9256 | 26.4827 | 26.9737 |
| Cct5    | 27.4448 | 27.5795 | 27.4081 | 27.7723 |
| Cct6a   | 26.5288 | 26.7301 | 26.7914 | 26.8469 |
| Cct7    | 26.9013 | 27.052  | 26.8234 | 27.2307 |
| Cct8    | 26.6199 | 26.5669 | 26.766  | 26.6706 |
| Cd109   | 26.3987 | 26.4729 | 26.2594 | 26.5873 |
| Cd151   | 23.998  | 23.7167 | 25.7762 | 24.8173 |
| Cd163   | 22.481  | 22.2998 | 22.4508 | 22.1321 |
| Cd200   | 25.5432 | 25.5546 | 26.277  | 25.5896 |
| Cd2ap   | 23.8952 | 23.1879 | 23.5164 | 23.5029 |



|          |         |         |         |         |
|----------|---------|---------|---------|---------|
| Cd34     | 24.9544 | 24.3949 | 24.8112 | 24.5739 |
| Cd36     | 27.2874 | 26.9651 | 26.8272 | 26.833  |
| Cd44     | 22.3702 | 22.6057 | nd      | 22.2673 |
| Cd47     | 24.2704 | 24.2064 | 24.3471 | 24.6357 |
| Cd81     | 27.9087 | 28.184  | 28.1713 | 28.3168 |
| Cd9      | 26.1254 | 26.2785 | 26.2336 | 26.8382 |
| Cd97     | 24.5657 | 24.5855 | 24.7016 | 24.856  |
| Cd99     | nd      | 19.7963 | 19.8504 | 20.3008 |
| Cdc37    | 24.3828 | 24.6881 | 24.6414 | 24.8321 |
| Cdc42    | 27.0821 | 27.3129 | 27.4198 | 27.3839 |
| Cdc42bpb | 23.5881 | 24.3058 | 23.9253 | 24.3425 |
| Cdh13    | 28.4412 | 28.5236 | 28.5212 | 28.601  |
| Cdh6     | 21.0666 | 21.4134 | 21.3428 | 21.3541 |
| Cdipt    | nd      | 21.7655 | nd      | nd      |
| Cdk13    | nd      | 21.7539 | 21.4877 | 21.6708 |
| Cdk5     | 21.5955 | 21.8418 | 21.8452 | 22.3787 |
| Cds2     | nd      | 24.2628 | 23.5252 | 24.1321 |
| Celf2    | 21.2786 | 23.3723 | 23.4774 | 23.5382 |
| Cenpv    | 24.771  | 24.7011 | 24.8541 | 24.5378 |
| Ces1c    | 27.9313 | 27.3353 | 27.6676 | 27.3862 |
| Ces1d    | 29.281  | 29.2707 | 28.5969 | 28.1984 |
| Cfb      | 24.3956 | 23.9419 | 24.2687 | 24.4372 |
| Cfd      | 24.1065 | 23.2594 | 24.6277 | nd      |
| Cfh      | 27.8228 | 27.754  | 27.7502 | 27.8038 |
| Cfi      | 23.8894 | 23.1406 | 23.5716 | 23.5219 |
| Cfl1     | 29.4169 | 29.3975 | 29.4765 | 29.4227 |
| Cfl2     | 25.277  | 25.1431 | 25.3242 | 25.3358 |
| Chchd3   | 23.6862 | nd      | 23.8835 | 23.4975 |
| Chchd6   | 23.6343 | 24.0925 | 23.0619 | 23.0209 |
| Chd4     | 24.028  | 24.0514 | 23.8776 | 24.3272 |
| Chmp3    | 22.9398 | nd      | 22.4629 | 22.7199 |
| Chmp4b   | 23.0094 | 23.5173 | 23.3126 | 23.4913 |
| Chst12   | 21.3398 | 21.4773 | 21.6001 | 22.6808 |
| Chtop    | 23.1518 | 22.907  | 23.3027 | 21.8768 |
| Cisd1    | 24.6337 | 25.0199 | 24.8576 | 24.6932 |
| Ckap4    | 27.18   | 26.8722 | 27.2363 | 27.2125 |
| Ckb      | 30.6345 | 30.6354 | 30.816  | 30.8059 |
| Ckm      | 26.0408 | 26.4894 | 27.7705 | 25.2622 |
| Clasp1   | 23.6051 | 23.6279 | 23.4073 | 23.9732 |
| Clcc1    | nd      | 22.821  | nd      | nd      |
| Clec10a  | 22.3591 | 21.6493 | nd      | 22.0708 |

|          |         |         |         |         |
|----------|---------|---------|---------|---------|
| Clec3b   | 25.1642 | 24.6559 | 25.719  | 25.1251 |
| Clic1    | 26.5545 | 26.7483 | 26.6245 | 26.9402 |
| Clic4    | 27.8491 | 28.0552 | 27.9853 | 28.1524 |
| Clint1   | 20.1842 | 21.0473 | 20.4784 | 21.4088 |
| Clptm1l  | 21.7945 | 21.9295 | 21.5272 | 22.3985 |
| Cltb     | 23.0622 | 22.7925 | 23.5023 | nd      |
| Cltc     | 30.6598 | 30.7513 | 30.6624 | 30.8274 |
| Clu      | 26.8994 | 26.5326 | 26.9548 | 26.4375 |
| Clybl    | 25.3417 | 25.868  | 25.0875 | 25.0928 |
| Cma1     | 27.7984 | 27.6609 | 28.294  | 28.2905 |
| Cmpk1    | 24.7989 | 24.795  | 24.3686 | 25.1112 |
| Cnbp     | 23.949  | 24.3884 | 24.2025 | 24.6076 |
| Cndp2    | 25.8287 | 25.6141 | 26.0921 | 25.8774 |
| Cnn1     | 31.952  | 32.141  | 31.9699 | 32.1599 |
| Cnn2     | 28.3023 | 28.6949 | 28.3807 | 28.8859 |
| Cnn3     | 28.4449 | 28.607  | 28.3951 | 28.4187 |
| Cnp      | 23.625  | 23.6087 | 26.2921 | 22.6545 |
| Cnpy2    | 22.2611 | 22.1551 | 22.9314 | 22.0523 |
| Cnpy4    | 22.8355 | 22.4519 | nd      | 22.6235 |
| Coa3     | 22.6749 | 22.328  | 22.2907 | 22.1322 |
| Coasy    | 22.6247 | 23.3137 | 22.7586 | 22.5968 |
| Col12a1  | 22.8611 | 22.0899 | 22.7644 | 24.0245 |
| Col14a1  | 30.3566 | 30.3983 | 30.2132 | 30.5856 |
| Col15a1  | 29.974  | 30.0623 | 30.0227 | 30.0103 |
| Col18a1  | 30.9928 | 30.9678 | 30.9356 | 30.9053 |
| Col1a1   | 33.818  | 33.669  | 33.992  | 33.7303 |
| Col1a2   | 33.1868 | 32.8979 | 33.5575 | 32.6132 |
| Col2a1   | 31.0839 | 30.6976 | 31.3341 | 30.8796 |
| Col3a1   | 26.8411 | 26.6255 | 27.1082 | 26.1298 |
| Col4a1   | 30.8182 | 30.8457 | 30.8894 | 31.0014 |
| Col4a2   | 30.5527 | 30.4349 | 30.6906 | 30.5765 |
| Col4a3   | 24.8549 | 24.9156 | 25.0162 | 25.0889 |
| Col4a4   | 23.2534 | nd      | nd      | 24.7846 |
| Col5a1   | 28.288  | 28.0822 | 28.2738 | 28.3127 |
| Col5a2   | 27.8226 | 27.7042 | 27.9213 | 27.8983 |
| Col6a1   | 32.679  | 32.5808 | 32.5993 | 32.6441 |
| Col6a2   | 32.4845 | 32.2796 | 32.4044 | 32.1751 |
| Col6a5   | 25.8701 | 26.2768 | 26.1371 | 26.0337 |
| Col6a6   | 30.1567 | 30.1597 | 30.3139 | 30.2087 |
| Colgalt1 | 23.3113 | 23.4689 | 24.8379 | 23.2761 |
| Commd3   | 22.599  | 22.8869 | 23.0027 | 22.6458 |

|        |         |         |         |         |
|--------|---------|---------|---------|---------|
| Commd4 | nd      | 20.9101 | 21.0649 | 21.2888 |
| Commd9 | 23.1578 | 23.4765 | 23.6243 | 24.1756 |
| Comt   | 24.2909 | 24.6977 | 24.2658 | 24.7261 |
| Comtd1 | 22.3755 | 22.3477 | 21.9144 | 22.3311 |
| Copa   | 26.5509 | 26.9379 | 26.7247 | 27.0557 |
| Copb1  | 26.0552 | 26.1404 | 25.9023 | 26.1812 |
| Copb2  | 23.8169 | 24.4455 | 24.127  | 23.9392 |
| Cope   | 24.9623 | 24.96   | 24.8712 | 24.9919 |
| Copg1  | 26.3027 | 26.4821 | 26.1654 | 26.7415 |
| Copg2  | nd      | nd      | nd      | nd      |
| Cops2  | 25.9109 | 26.1863 | 25.9409 | 25.8242 |
| Cops3  | 24.9946 | 24.9854 | 25.1602 | 25.4029 |
| Cops4  | 23.7757 | 24.3514 | 23.9142 | 24.1094 |
| Cops5  | 23.8333 | 23.821  | 23.9329 | 24.2898 |
| Cops6  | 21.7626 | nd      | 22.6434 | 20.7402 |
| Cops7a | 23.573  | 23.5237 | 23.2577 | 23.747  |
| Copz1  | 22.7182 | 23.0806 | 23.1581 | 23.1516 |
| Coq10b | 21.6148 | 21.7708 | 21.3456 | 21.5522 |
| Coq6   | 22.3308 | 23.7008 | 22.62   | 23.4571 |
| Coq9   | 24.114  | 24.6331 | 23.6564 | 23.8255 |
| Coro1a | 22.6346 | 22.4903 | 22.6918 | 22.4098 |
| Coro1b | 25.7547 | 25.8058 | 25.4119 | 25.5301 |
| Coro1c | 28.0167 | 28.0579 | 28.0646 | 28.0703 |
| Cotl1  | 20.9516 | 21.5811 | 20.9333 | 21.0857 |
| Cox4i1 | 27.2703 | 27.4549 | 26.8486 | 26.2604 |
| Cox5a  | 28.7857 | 28.8309 | 28.3802 | 28.1764 |
| Cox5b  | 26.0315 | 26.515  | 26.3205 | 25.3299 |
| Cox6a1 | 27.9238 | 28.6204 | 27.6672 | 27.7134 |
| Cox6b1 | 27.6816 | 27.8145 | 27.3905 | 26.7434 |
| Cox6c  | 26.109  | 26.2779 | 26.1315 | 25.2852 |
| Cox7a1 | 26.1823 | 26.48   | 24.9703 | 24.0036 |
| Cox7a2 | 25.1234 | 25.1771 | 25.2985 | 24.3472 |
| Cox7c  | 24.5126 | 24.4978 | 23.629  | 23.7496 |
| Cp     | 25.6881 | 25.6796 | 26.1975 | 26.038  |
| Cpa3   | 28.0139 | 27.7997 | 28.3848 | 28.1692 |
| Cpe    | 23.6718 | 23.809  | 23.628  | 23.6822 |
| Cpne1  | 26.32   | 26.4998 | 26.4963 | 26.6559 |
| Cpne2  | 22.5676 | 22.4027 | 22.691  | 22.8198 |
| Cpne3  | 26.2174 | 26.3611 | 25.9557 | 26.4723 |
| Cpox   | 21.2989 | 21.3736 | 20.9389 | 21.1689 |
| Cpped1 | 22.7575 | 22.2497 | nd      | 22.489  |

|         |         |         |         |         |
|---------|---------|---------|---------|---------|
| Cpq     | 24.2739 | 24.3689 | 23.8699 | 24.5912 |
| Cpsf6   | 25.0136 | 25.7748 | 25.0932 | 25.5111 |
| Cpsf7   | 23.4886 | 23.8633 | 23.6944 | 23.8102 |
| Cpt1a   | 24.3363 | 24.5728 | 24.312  | 24.5004 |
| Cpt1b   | 25.1896 | 25.2821 | 23.829  | 23.6005 |
| Cpt2    | 26.8029 | 26.7209 | 25.3621 | 25.2354 |
| Cr1l    | nd      | 23.5855 | 22.9423 | 23.1407 |
| Crat    | 25.1085 | 25.2603 | 24.6572 | 24.5499 |
| Creld1  | 21.0771 | 21.1197 | 20.752  | 21.322  |
| Crip1   | 30.0276 | 29.8793 | 29.9751 | 30.2304 |
| Crip2   | 29.76   | 29.5179 | 29.7872 | 29.5284 |
| Crk     | 24.9612 | 25.1502 | 24.999  | 25.2021 |
| Crkl    | 22.8057 | nd      | 23.1881 | 23.2344 |
| Cryab   | 25.2257 | 25.2952 | 25.9783 | 25.5784 |
| Cryl1   | 24.6474 | 24.9093 | 24.5298 | 25.0494 |
| Cryz    | 23.6475 | 23.5717 | 23.3577 | 23.5267 |
| Cs      | 29.9524 | 30.1832 | 29.5614 | 29.5295 |
| Csad    | 25.601  | 25.7124 | 25.5466 | 25.4869 |
| Cse1l   | 27.083  | 27.6988 | 27.2894 | 27.6006 |
| Csk     | 24.0787 | 23.295  | nd      | 23.1018 |
| Csnk1a1 | 22.691  | 22.3799 | 22.2809 | nd      |
| Csnk2a1 | 24.7701 | 24.6929 | 25.1699 | 25.0642 |
| Csnk2b  | 23.5782 | 23.9779 | 23.0822 | 23.9164 |
| Cspg4   | 28.7748 | 28.7311 | 28.8571 | 28.8646 |
| Csrp1   | 30.0979 | 29.6723 | 30.0952 | 29.5287 |
| Csrp2   | 29.6651 | 29.4215 | 29.7367 | 29.2551 |
| Cst3    | nd      | 24.2633 | nd      | 24.2897 |
| Cstb    | 25.4984 | 25.9084 | 25.1546 | 25.5552 |
| Cstf2   | 23.2402 | 23.5905 | 22.7917 | 23.4794 |
| Ctbp1   | 24.8536 | 25.2078 | 24.8721 | 25.3514 |
| Ctcf    | nd      | nd      | 22.4613 | nd      |
| Ctnna1  | 26.2871 | 26.5935 | 26.4942 | 26.7456 |
| Ctnna2  | 22.5184 | 23.0332 | 22.3287 | 22.8435 |
| Ctnna3  | 22.5152 | 23.1852 | nd      | 22.626  |
| Ctnnal1 | 23.7897 | 23.7048 | 23.3905 | 24.0543 |
| Ctnnb1  | 25.9568 | 26.1867 | 26.0537 | 26.5155 |
| Ctnnbl1 | nd      | nd      | nd      | 21.2976 |
| Ctnnd1  | 24.6119 | 24.7277 | 25.109  | 25.0646 |
| Ctsb    | 25.8439 | 25.6414 | 25.81   | 25.2392 |
| Ctsd    | 27.4879 | 27.8593 | 27.4842 | 27.705  |
| Ctsh    | 24.2714 | 24.1303 | 24.5209 | 24.4637 |

|           |         |         |         |         |
|-----------|---------|---------|---------|---------|
| Ctnn      | 24.5962 | 24.7392 | 24.8077 | 23.931  |
| Ctnnbp2nl | 21.9745 | 22.9908 | 22.9062 | 23.0792 |
| Cul1      | 22.6497 | 21.6805 | 22.3141 | 22.2079 |
| Cul3      | 22.684  | 23.101  | 22.4461 | 22.7242 |
| Cul4a     | 22.3826 | 22.2995 | 22.3273 | 22.7082 |
| Cul5      | nd      | 22.8741 | 21.8075 | 23.8314 |
| Cuta      | 25.7215 | 25.8504 | 25.7847 | 26.1514 |
| Cutc      | nd      | 22.5797 | 21.268  | 21.4095 |
| Cxcl12    | nd      | 22.7332 | 23.0112 | 23.2552 |
| Cyb5a     | 24.305  | 25.3711 | 25.0506 | 24.6991 |
| Cyb5b     | 23.8288 | 23.3546 | 23.9875 | 23.4903 |
| Cyb5r1    | 23.9847 | 24.3809 | 23.7612 | 24.3947 |
| Cyb5r3    | 30.0901 | 29.9905 | 30.1793 | 30.103  |
| Cybc1     | 23.0852 | 23.1821 | 22.3453 | 23.6072 |
| Cyc1      | 27.1568 | 27.4075 | 26.8882 | 26.7188 |
| Cycs      | 27.3612 | 27.5026 | 26.7714 | 26.6404 |
| Cyfp1     | 25.9273 | 25.9843 | 25.9805 | 26.4677 |
| Cygb      | 24.6985 | 24.7041 | 24.5652 | 24.5045 |
| Cyp20a1   | 23.1112 | 23.5873 | 23.2637 | 23.7354 |
| Cyp2f2    | 21.672  | nd      | 20.5176 | 20.6331 |
| Cyp4b1    | 21.2033 | 20.7465 | 21.4557 | 21.3323 |
| D10Jhu81e | 27.4922 | 27.9956 | 27.3659 | 27.6958 |
| Daam1     | 22.2386 | 22.426  | 21.8702 | 21.7474 |
| Dab2      | 22.6551 | 22.6012 | 22.4501 | 22.4804 |
| Dag1      | 26.5878 | 26.2626 | 26.5275 | 26.4483 |
| Dapk3     | 22.5104 | nd      | 23.1099 | nd      |
| Dars      | 26.403  | 26.5245 | 26.3925 | 26.6161 |
| Dazap1    | 22.1825 | 21.5574 | nd      | 22.3137 |
| Dbi       | 27.3086 | 27.5176 | 27.4971 | 26.9761 |
| Dbnl      | 25.1361 | 25.0908 | 25.7338 | 25.1426 |
| Dbt       | 26.1359 | 26.2849 | 26.2405 | 25.9595 |
| Dcn       | 32.5271 | 32.5931 | 32.7526 | 32.9066 |
| Dcps      | 23.243  | 23.4832 | 22.6395 | 24.1939 |
| Dctn1     | 25.7278 | 25.848  | 26.1803 | 26.0475 |
| Dctn2     | 26.5074 | 26.4244 | 26.893  | 26.3788 |
| Dctn3     | 22.3279 | 21.9286 | 22.1105 | 22.3066 |
| Dctn5     | 21.609  | 21.2374 | nd      | 21.0989 |
| Dcxr      | 19.1937 | 19.8425 | 19.1855 | 19.8147 |
| Ddah2     | 26.6203 | 26.6483 | 26.6853 | 26.9918 |
| Ddb1      | 25.134  | 25.2557 | 25.2398 | 25.4193 |
| Ddhd2     | nd      | nd      | nd      | nd      |

|         |         |         |         |         |
|---------|---------|---------|---------|---------|
| Ddst    | 27.0658 | 27.1708 | 26.9681 | 27.3009 |
| Ddrgk1  | 23.7121 | 24.1355 | 23.2124 | 23.8631 |
| Ddt     | 26.9397 | 27.1692 | 27.1341 | 26.9181 |
| Ddx1    | 26.757  | 26.8868 | 26.4985 | 26.8333 |
| Ddx17   | 23.3013 | 23.8884 | 24.3701 | 24.3518 |
| Ddx21   | 22.287  | 22.6842 | 22.3804 | 23.1284 |
| Ddx25   | 21.4624 | 22.02   | 22.3056 | 22.5027 |
| Ddx39b  | 27.1693 | 27.1952 | 27.0413 | 27.2421 |
| Ddx3x   | 27.1637 | 27.3944 | 27.0378 | 27.3161 |
| Ddx3y   | 23.4675 | 24.3062 | 23.5292 | 24.1462 |
| Ddx42   | nd      | 24.5772 | 24.8894 | 25.3364 |
| Ddx46   | nd      | 21.5276 | 21.6611 | nd      |
| Ddx5    | 26.804  | 27.0117 | 26.8564 | 27.2457 |
| Ddx50   | 26.3973 | 27.2114 | 26.5813 | 27.2698 |
| Ddx6    | 22.4487 | 22.8146 | 22.5321 | 23.1451 |
| Decr1   | 28.3225 | 28.5648 | 28.0854 | 28.1605 |
| Dek     | 24.2438 | 24.6054 | 23.5438 | 24.5721 |
| Derl1   | 23.6023 | 23.6624 | 23.0444 | 23.0837 |
| Des     | 26.648  | 26.8145 | 27.1836 | 27.3264 |
| Dhdh    | 24.4154 | 24.6747 | 24.738  | 24.3038 |
| Dhrs1   | 24.0427 | 24.1372 | 24.0057 | 24.3975 |
| Dhrs7b  | nd      | 22.325  | 21.6544 | 21.9141 |
| Dhx15   | 23.1425 | 23.8088 | 23.6065 | 23.9758 |
| Dhx29   | nd      | 19.837  | 20.2438 | 20.2862 |
| Dhx9    | 26.519  | 26.897  | 26.5823 | 26.7511 |
| Diaph1  | nd      | 21.6591 | 22.3158 | 22.0531 |
| Dkc1    | 22.8321 | 22.4416 | 22.1442 | 22.7274 |
| Dlat    | 28.6207 | 28.8171 | 28.3147 | 28.0459 |
| Dld     | 28.0733 | 28.4271 | 27.8295 | 27.8994 |
| Dlst    | 27.7475 | 27.9669 | 27.4494 | 27.1499 |
| Dmd     | 29.7344 | 29.8716 | 29.759  | 29.9121 |
| Dmpk    | 23.1152 | 23.9886 | 23.0843 | 24.0476 |
| Dnaja1  | 23.8994 | 24.3998 | 23.4918 | 23.6798 |
| Dnaja2  | 24.5277 | 24.5483 | 23.8482 | 24.1791 |
| Dnaja3  | 23.1101 | 23.7909 | nd      | 22.8179 |
| Dnajb4  | 25.751  | 25.8843 | 25.6329 | 26.35   |
| Dnajc10 | 23.0021 | 22.2425 | 23.2217 | 22.5313 |
| Dnajc11 | 22.9522 | 23.313  | 22.951  | 23.8755 |
| Dnajc19 | 19.4119 | 20.4113 | 19.4444 | 19.7407 |
| Dnajc3  | 23.3374 | 23.4211 | 22.5206 | 23.1703 |
| Dnm1    | 21.4949 | 21.7874 | 22.0969 | 21.6176 |

|          |         |         |         |         |
|----------|---------|---------|---------|---------|
| Dnm1l    | 26.6925 | 26.8451 | 26.6994 | 26.9001 |
| Dnm2     | 26.137  | 26.4331 | 26.3803 | 26.658  |
| Dnpep    | 26.1214 | 26.2733 | 26.2298 | 26.2208 |
| Dock7    | 23.4529 | 23.4399 | 22.9037 | 23.8933 |
| Dpep1    | 28.6218 | 28.205  | 28.5203 | 28.7813 |
| Dpp3     | 23.7525 | 23.8414 | 24.3719 | 24.4873 |
| Dpp7     | 21.6897 | 21.9542 | 21.691  | 22.2753 |
| Dpt      | 29.645  | 29.3788 | 29.5871 | 29.332  |
| Dpy30    | 26.2733 | 26.4886 | 25.9716 | 26.7029 |
| Dpysl2   | 29.6038 | 29.6469 | 29.697  | 29.4489 |
| Dpysl3   | 29.8842 | 29.8968 | 30.0016 | 29.9977 |
| Drap1    | nd      | 21.4951 | 20.6588 | 21.4532 |
| Dsp      | 22.9994 | 23.4935 | nd      | nd      |
| Dst      | 21.237  | 21.9259 | 21.2424 | 21.6236 |
| Dstn     | 31.1208 | 31.2158 | 30.9874 | 31.312  |
| Dtd2     | 22.3972 | 21.9344 | 21.815  | 22.1816 |
| Dtna     | 26.5776 | 26.8116 | 26.7859 | 26.8921 |
| Dusp19   | 28.2663 | 28.5279 | 28.5957 | 28.379  |
| Dusp3    | 25.7991 | 25.9241 | 25.7915 | 25.679  |
| Dync1h1  | 29.6461 | 29.7249 | 29.7193 | 29.9431 |
| Dync1i2  | 23.4009 | 24.025  | 23.5924 | 24.2459 |
| Dync1li1 | 25.2539 | 25.547  | 25.294  | 25.4688 |
| Dynll1   | 27.4922 | 27.8415 | 27.6903 | 27.6265 |
| Dynlrb1  | 24.4801 | 25.0067 | 25.4713 | 25.1361 |
| Dynlt1   | 21.5392 | 22.1658 | 21.9087 | 22.209  |
| Dynlt3   | 23.1664 | 23.4558 | 23.6728 | 23.1833 |
| Dysf     | 25.6613 | 25.8254 | 25.668  | 25.4119 |
| Ech1     | 25.8654 | 26.3136 | 25.334  | 25.4303 |
| Echdc2   | 20.0527 | 20.2585 | 20.1727 | nd      |
| Echs1    | 27.9398 | 28.1785 | 27.534  | 27.5813 |
| Eci1     | 28.244  | 28.4269 | 27.6658 | 27.0605 |
| Eci2     | 23.9771 | 24.6824 | 24.2029 | 24.0697 |
| Ecm1     | 25.4325 | 25.1981 | 25.0057 | 25.2686 |
| Ecm29    | 24.1193 | 24.1898 | 23.952  | 24.1655 |
| Ecsit    | 21.5247 | 21.6793 | 21.2896 | 20.6654 |
| Eef1a1   | 31.1993 | 31.3733 | 31.2736 | 31.3908 |
| Eef1b    | 26.8838 | 26.5248 | 26.629  | 26.5671 |
| Eef1d    | 26.4051 | 25.8844 | 26.6034 | 25.9273 |
| Eef1e1   | 21.8464 | 21.5343 | 21.84   | 21.9269 |
| Eef1g    | 27.3376 | 27.6175 | 27.4756 | 27.5746 |
| Eef2     | 29.6719 | 29.8369 | 29.6253 | 29.9248 |

|         |         |         |         |         |
|---------|---------|---------|---------|---------|
| Efemp1  | 27.9125 | 28.0651 | 27.6877 | 28.2557 |
| Efemp2  | 26.9909 | 27.157  | 27.0107 | 27.2348 |
| Efhd1   | 24.1606 | 24.0192 | 23.841  | 24.0343 |
| Efhd2   | 22.4466 | 22.4927 | 22.3226 | 22.5088 |
| Efr3a   | 22.2857 | 22.8929 | 22.7267 | 23.3169 |
| Eftud2  | 24.4144 | 24.2539 | 23.9353 | 24.3196 |
| Egfr    | 24.1369 | 23.6289 | 24.7974 | 23.8424 |
| Ehbp1l1 | 22.828  | 23.3003 | 23.0354 | 23.238  |
| Ehd1    | 27.6912 | 27.5548 | 28.0376 | 27.8446 |
| Ehd2    | 31.8135 | 31.9234 | 31.7843 | 32.1333 |
| Ehd3    | 22.0406 | 22.5115 | 22.5615 | 21.9088 |
| Ehd4    | 28.3906 | 28.3972 | 28.4298 | 28.1888 |
| Eif2s1  | 24.7653 | 24.5108 | 24.4925 | 24.7766 |
| Eif2s3x | 24.331  | 24.6187 | 24.2624 | 24.8385 |
| Eif3a   | 26.1341 | 26.4691 | 26.3594 | 26.5563 |
| Eif3b   | 23.838  | 23.6799 | 24.1653 | 24.0836 |
| Eif3c   | 24.6256 | 24.7185 | 24.3081 | 24.9625 |
| Eif3d   | 23.7197 | 24.3193 | 24.0812 | 24.1965 |
| Eif3e   | 23.7005 | 23.8821 | 23.9079 | 24.0328 |
| Eif3f   | 26.0378 | 26.1452 | 25.4294 | 26.1411 |
| Eif3g   | 23.2781 | 23.1584 | 23.2275 | 23.1382 |
| Eif3h   | 23.3156 | nd      | nd      | 22.9287 |
| Eif3j1  | 23.5621 | 23.2179 | 23.1324 | 23.6759 |
| Eif3k   | 23.4069 | 23.5721 | 23.0869 | 23.7198 |
| Eif3l   | 23.4153 | 23.3695 | 23.2427 | 23.6544 |
| Eif3m   | 24.1105 | 24.3934 | 24.431  | 24.582  |
| Eif4a1  | 27.45   | 27.7148 | 27.6899 | 27.5778 |
| Eif4a2  | 24.3112 | 24.1038 | 24.4917 | 24.2978 |
| Eif4a3  | 24.9825 | 25.2319 | 24.8621 | 25.614  |
| Eif4b   | 25.8706 | 25.8476 | 24.5874 | 24.2809 |
| Eif4e   | 23.0134 | 23.5023 | 23.3868 | 23.5197 |
| Eif4g1  | 24.0196 | 24.4107 | 23.4985 | 24.591  |
| Eif4g2  | 24.1219 | 24.2645 | 24.1567 | 24.2886 |
| Eif4h   | 25.437  | 25.3756 | 25.4391 | 25.7576 |
| Eif5    | 24.6105 | 24.4275 | 24.7219 | 24.927  |
| Eif5a   | 27.4684 | 27.4496 | 27.3228 | 27.2459 |
| Eif5b   | 24.3492 | 24.5725 | 24.7304 | 24.7161 |
| Elavl1  | 24.8262 | 25.1057 | 25.0499 | 25.3972 |
| Eln     | 30.9944 | 31.0447 | 31.0891 | 31.171  |
| Elov11  | 24.6707 | 25.3036 | 24.6494 | 25.6742 |
| Emc1    | 23.9706 | 23.6434 | 23.5792 | 24.1605 |



|         |         |         |         |         |
|---------|---------|---------|---------|---------|
| Emc8    | 22.8344 | 21.6026 | 22.7153 | 22.5936 |
| Emd     | 25.6537 | 26.4941 | 25.5767 | 26.3047 |
| Emilin1 | 29.5465 | 29.6281 | 29.4997 | 29.542  |
| Eml1    | 26.5125 | 26.6027 | 26.5633 | 26.6889 |
| Eml2    | 26.6524 | 26.933  | 26.671  | 26.5144 |
| Enah    | 27.3045 | 27.5407 | 27.2175 | 27.353  |
| Endod1  | 26.7278 | 26.9688 | 26.9804 | 27.0965 |
| Eno1    | 29.9134 | 29.8913 | 29.8601 | 29.4392 |
| Eno2    | nd      | 21.0453 | 23.3711 | 22.7781 |
| Eno3    | 23.3066 | 24.2886 | 25.0703 | nd      |
| Enpep   | 23.1338 | 22.1693 | 23.7141 | 23.9204 |
| Enpp1   | 23.763  | 24.0653 | 23.6612 | 23.4211 |
| Enpp3   | 24.6838 | 24.7997 | 25.0346 | 24.873  |
| Enpp4   | 21.4478 | 21.448  | 20.9133 | 21.658  |
| Entpd1  | 27.0568 | 27.1399 | 27.1572 | 27.1591 |
| Entpd2  | 29.2601 | 29.2768 | 29.2729 | 29.546  |
| Epb41   | 23.6701 | 23.4968 | 24.0808 | 23.7496 |
| Epb41l2 | 25.2811 | 25.4984 | 25.8265 | 25.2065 |
| Ephx1   | 28.5353 | 28.8113 | 28.7037 | 28.8291 |
| Ephx2   | 24.7692 | 25.2722 | 23.9959 | 24.4526 |
| Epn1    | 22.2213 | 22.2835 | 22.5257 | 22.6257 |
| Epn2    | 22.6261 | 22.9124 | nd      | 22.8003 |
| Epn3    | nd      | nd      | 19.8421 | nd      |
| Eppk1   | 22.6985 | 22.8974 | 22.9157 | 22.1515 |
| Eprs    | 26.436  | 26.4202 | 26.2975 | 26.4506 |
| Eps15   | 21.8715 | 21.1687 | nd      | 22.5769 |
| Eps8l2  | nd      | 21.7472 | 21.9156 | 21.8477 |
| Erap1   | nd      | 23.2952 | 23.0126 | 22.9846 |
| Erbp2ip | 20.8318 | 21.2455 | 20.6783 | 20.9799 |
| Ergic1  | 25.3033 | 25.1343 | 25.1181 | 25.5294 |
| Erh     | 24.4596 | 24.6105 | 24.5638 | 24.3262 |
| Ero1l   | 23.42   | 23.5792 | 23.4261 | 23.5359 |
| Erp29   | 24.6483 | 24.4568 | 24.9188 | 24.8669 |
| Erp44   | 25.4827 | 25.6752 | 25.6616 | 25.6414 |
| Esd     | 28.0079 | 28.0964 | 28.0809 | 28.2086 |
| Esyt1   | 28.5967 | 28.9212 | 28.7391 | 29.0803 |
| Esyt2   | 26.5233 | 26.6698 | 26.5899 | 26.7703 |
| Etf1    | 22.976  | 24.0078 | 23.4312 | nd      |
| Etfb    | 30.063  | 30.2185 | 29.4514 | 29.1303 |
| Etfb    | 28.5119 | 28.4368 | 28.1468 | 27.6838 |
| Etfdh   | 26.4773 | 26.4584 | 26.1829 | 25.8059 |

|          |         |         |         |         |
|----------|---------|---------|---------|---------|
| Ethe1    | 25.091  | 25.5768 | 25.6981 | 25.4859 |
| Exoc2    | nd      | 21.944  | 20.7815 | 21.8026 |
| Exoc6b   | 22.9399 | 23.37   | 22.8576 | 23.4118 |
| F13a1    | 27.1042 | 26.9812 | 26.8716 | 26.9087 |
| F2       | 25.9862 | 25.4844 | 25.7777 | 25.6905 |
| Fabp3    | 25.1429 | 25.0685 | 25.6021 | 24.0385 |
| Fabp4    | 28.5797 | 28.6666 | 28.0437 | 27.4338 |
| Faf2     | 22.4752 | 22.4309 | 22.5537 | 22.9151 |
| Fah      | 25.798  | 25.9704 | 25.9621 | 26.5108 |
| Fam114a1 | 23.8741 | 24.0211 | 23.9425 | 23.694  |
| FAM120A  | nd      | 22.9999 | 22.3513 | 22.8717 |
| Fam129a  | 27.5712 | 27.5327 | 27.5636 | 27.8079 |
| Fam129b  | 24.5183 | 24.6648 | 24.403  | 24.5637 |
| Fam162a  | 23.9915 | 24.1416 | 24.1052 | 24.2348 |
| Fam175b  | nd      | 20.7702 | 21.0821 | 19.7256 |
| Fam213a  | 22.8029 | 22.9492 | 23.2881 | 22.2353 |
| Fam3c    | 22.6238 | 23.0001 | 22.7409 | 22.5619 |
| Fam50b   | 26.0277 | 25.9074 | 26.2005 | 25.7981 |
| Fam98a   | 21.0789 | 21.7925 | 20.7091 | 21.2002 |
| Fam98b   | 22.6718 | nd      | nd      | nd      |
| Farsa    | 25.0703 | 25.3006 | 24.6503 | 25.3325 |
| Farsb    | 24.3218 | 24.4409 | 24.5443 | 24.8667 |
| Fasn     | 29.9113 | 30.8062 | 29.8957 | 29.2166 |
| Fau      | 25.3532 | 25.7817 | 25.1928 | 25.6343 |
| Fbl      | 24.9512 | 24.9932 | 24.5615 | 25.3616 |
| Fblim1   | 30.0188 | 30.2408 | 30.1299 | 30.3792 |
| Fbln1    | 23.9799 | 23.2466 | 23.6193 | 23.2287 |
| Fbln1    | 23.9744 | nd      | 23.5919 | 23.5055 |
| Fbln2    | 26.5436 | 26.4019 | 26.8116 | 26.3338 |
| Fbln5    | 32.5559 | 32.583  | 32.4853 | 32.7413 |
| Fbn1     | 33.1539 | 32.998  | 33.2872 | 33.1407 |
| Fbn2     | 24.5666 | 24.6153 | 24.03   | 24.9466 |
| Fbxo2    | 22.1065 | 22.7175 | 23.0714 | 23.1258 |
| Fbxo30   | 22.153  | 22.6419 | 22.1669 | 23.0593 |
| Fbxo6    | 20.9642 | 22.6683 | nd      | 19.4526 |
| Fcgrt    | 23.7174 | 23.8939 | 23.8515 | nd      |
| Fcho2    | nd      | 21.9787 | 22.1371 | 22.2323 |
| Fdps     | 21.673  | 21.7959 | 22.493  | 22.3914 |
| Fech     | 25.0554 | 24.6835 | nd      | 24.3657 |
| Fermt2   | 29.4231 | 29.4812 | 29.4078 | 29.465  |
| Fermt3   | 23.8022 | 24.0388 | 23.2019 | nd      |

|         |         |         |         |         |
|---------|---------|---------|---------|---------|
| Fetub   | 22.8817 | 22.1435 | 22.1242 | 22.4219 |
| Fga     | 30.3406 | 29.3603 | 29.4076 | 29.3298 |
| Fgb     | 31.245  | 30.2024 | 30.2201 | 30.2339 |
| Fgf1    | 21.9923 | 22.5543 | 23.2764 | 23.228  |
| Fgg     | 31.3064 | 30.4473 | 30.4536 | 30.4668 |
| Fgl2    | nd      | nd      | nd      | nd      |
| Fh      | 28.577  | 28.8724 | 28.1706 | 28.2691 |
| Fhl1    | 29.8644 | 29.8668 | 29.8637 | 29.8357 |
| Fhl3    | 24.4406 | 24.1738 | 24.8317 | 24.183  |
| Filip1l | 25.047  | 25.6445 | 25.6886 | 25.982  |
| Fis1    | 26.3586 | 26.4431 | 26.5693 | 26.628  |
| Fkbp10  | 24.0758 | 23.714  | 24.4943 | 24.0872 |
| Fkbp1a  | 26.3937 | 26.2032 | 26.2545 | 26.5428 |
| Fkbp2   | 23.9491 | 23.8437 | 23.9212 | 23.9842 |
| Fkbp3   | 22.8904 | nd      | 22.7843 | nd      |
| Fkbp4   | 24.5959 | 24.4697 | 24.8645 | 24.5563 |
| Fkbp9   | 23.5213 | 23.8553 | 23.6377 | 23.1695 |
| Flii    | 26.5777 | 27.0206 | 26.8647 | 27.2126 |
| Flna    | 34.9236 | 34.8237 | 35.0246 | 34.9085 |
| Flnb    | 27.5497 | 27.6525 | 27.7176 | 28.0311 |
| Flnc    | 28.7441 | 28.8784 | 28.8935 | 29.0739 |
| Flot1   | 24.9849 | 25.1881 | 25.063  | 25.3964 |
| Flot2   | 25.3692 | 25.4714 | 25.7805 | 25.7714 |
| Fmnl3   | nd      | 22.533  | 23.0774 | 22.7078 |
| Fmo1    | 26.9135 | 27.018  | 26.8368 | 27.1194 |
| Fmo2    | 30.266  | 30.3934 | 30.3281 | 30.4793 |
| Fmo3    | 23.6516 | 23.3701 | 21.3558 | 24.008  |
| Fmod    | 26.8035 | 26.8833 | 26.7462 | 27.4614 |
| Fmr1    | nd      | 21.0941 | 21.271  | nd      |
| Fn1     | 31.9818 | 31.6995 | 31.9329 | 32.0383 |
| Fnta    | nd      | 23.2673 | nd      | 23.5919 |
| Folh1   | 22.6529 | 22.1213 | 23.1025 | nd      |
| Fry     | 25.403  | 26.1005 | nd      | 27.2769 |
| Fstl1   | 23.2811 | 23.0446 | 23.6409 | 23.5057 |
| Fth1    | 26.7779 | 26.8744 | 27.0164 | 27.075  |
| Ftl1    | 27.4212 | 27.6891 | 27.8177 | 27.1397 |
| Fundc2  | 23.2187 | nd      | nd      | nd      |
| Fuom    | 23.4085 | 23.3284 | 23.2551 | 23.3991 |
| Fus     | 25.0057 | 24.7071 | 24.6897 | 24.2458 |
| Fxr1    | 23.5221 | 23.7264 | 23.3206 | 24.1248 |
| G3bp1   | 24.8513 | 25.2818 | 25.0846 | 25.5706 |

|         |         |         |         |         |
|---------|---------|---------|---------|---------|
| G3bp2   | 23.3199 | 23.1283 | 23.2366 | 23.3968 |
| G6pdx   | 26.2343 | 26.5584 | 26.2149 | 26.5866 |
| Gaa     | 22.0067 | 22.5505 | 22.8658 | 22.9608 |
| Gabarap | nd      | nd      | 20.3525 | nd      |
| Gak     | 21.1343 | 21.265  | 20.4183 | 21.1093 |
| Galk1   | 25.0721 | 25.5909 | 25.1219 | 25.8819 |
| Galm    | 22.53   | 22.8268 | 22.4179 | 22.9145 |
| Gamt    | 23.5933 | 23.4908 | 24.0138 | 23.2425 |
| Ganab   | 27.5382 | 27.7284 | 27.6383 | 27.8514 |
| Gapdh   | 32.0007 | 32.2784 | 32.0156 | 32.0946 |
| Gars    | 23.9422 | 23.0471 | 22.662  | 23.1247 |
| Gart    | 23.9771 | 24.033  | 23.4718 | 24.2399 |
| Gbas    | 23.941  | 24.2633 | 24.3535 | 24.1251 |
| Gbe1    | 22.8727 | 23.4959 | 23.3842 | 23.63   |
| Gbp2    | 23.6968 | 23.9977 | 24.0057 | 24.6277 |
| Gc      | 28.3101 | 27.956  | 28.4013 | 27.9779 |
| Gcat    | 21.5944 | 21.6641 | 21.4995 | 21.9437 |
| Gcdh    | 23.1083 | 22.6117 | nd      | 22.7959 |
| Gcn1    | 24.421  | 24.4878 | 23.969  | 24.6887 |
| Gda     | 23.3884 | 23.3314 | 23.1223 | 23.3231 |
| Gdi1    | 27.0633 | 27.2675 | 27.131  | 27.2381 |
| Gdi2    | 29.1576 | 29.339  | 29.1536 | 29.3619 |
| Ggcx    | 21.1224 | 21.2611 | nd      | 21.4537 |
| Gid8    | 23.0986 | 23.1868 | 22.8001 | 23.0028 |
| Gimap4  | 22.4144 | nd      | 22.3535 | 22.0416 |
| Git1    | 22.829  | 23.2753 | 23.3745 | 23.3153 |
| Git2    | nd      | 23.341  | 23.5424 | 22.431  |
| Glg1    | 25.5857 | 25.7189 | 25.5604 | 25.6855 |
| Glo1    | 27.7054 | 27.7715 | 27.804  | 27.8606 |
| Glod4   | 25.269  | 25.6162 | 25.5738 | 25.9331 |
| Glrx    | 24.8536 | 25.8126 | 25.326  | 25.8563 |
| Glrx3   | 24.4435 | 24.4126 | 24.5228 | 24.5793 |
| Gls     | 25.1131 | 25.426  | 25.5313 | 25.5283 |
| Gltp    | 23.3042 | 23.4024 | 23.3905 | 24.0094 |
| Glud1   | 28.8065 | 28.6748 | 28.7613 | 28.783  |
| Glul    | 25.3883 | 25.598  | 24.7941 | 24.1999 |
| Glyr1   | 23.2679 | 23.8386 | 23.6312 | 24.1494 |
| Gmfb    | nd      | 23.6175 | 23.3944 | 24.0674 |
| Gmppa   | 23.1617 | 23.535  | 22.9419 | 23.3358 |
| Gmppb   | 24.4668 | 24.5307 | 24.6794 | 24.4135 |
| Gmps    | 23.0532 | 22.9257 | 22.9115 | 22.6166 |

|         |         |         |         |         |
|---------|---------|---------|---------|---------|
| Gna11   | 26.0212 | 25.8901 | 25.9865 | 26.0565 |
| Gna13   | 23.191  | 22.7681 | 23.2747 | 22.7925 |
| Gnai1   | 23.6281 | 23.247  | 23.7453 | 23.7472 |
| Gnai2   | 27.9662 | 27.9355 | 28.1726 | 28.177  |
| Gnao1   | 23.211  | 23.1199 | 22.8252 | 23.6577 |
| Gnao1   | 25.816  | 25.7431 | 26.0346 | 25.6595 |
| Gnaq    | 26.0162 | 26.0786 | 26.1385 | 26.3159 |
| Gnas    | 25.8525 | 25.9453 | 26.0783 | 25.9145 |
| Gnb1    | 26.3046 | 26.1805 | 26.3997 | 26.1114 |
| Gnb2    | 27.8145 | 27.7068 | 27.8666 | 27.6045 |
| Gnb2l1  | 26.8826 | 27.0315 | 26.9558 | 27.0855 |
| Gnb4    | nd      | 23.7627 | 23.4376 | 23.2319 |
| Gng12   | 25.1528 | 25.1873 | 25.2798 | 25.4521 |
| Gng5    | 25.1148 | 24.9204 | 24.9701 | 24.9804 |
| Gnpda2  | nd      | 22.3533 | 20.9857 | 21.9734 |
| Gnpnat1 | nd      | 21.7645 | 21.6396 | 21.9406 |
| Golga2  | 21.0945 | 22.0737 | 22.0356 | 21.9557 |
| Gorasp2 | 23.5649 | 23.5418 | 23.77   | 23.9235 |
| Gosr2   | 21.1443 | 20.7757 | nd      | 21.8807 |
| Got1    | 24.2928 | 23.7697 | 24.4651 | 24.3468 |
| Got2    | 28.7496 | 28.9482 | 28.6439 | 29.0037 |
| Gp5     | 23.069  | 22.2332 | nd      | 21.3753 |
| Gpc4    | nd      | nd      | nd      | 22.6488 |
| Gpc6    | 26.245  | 26.4387 | 26.4191 | 26.578  |
| Gpd1    | 27.5569 | 28.1527 | 27.1148 | 25.9207 |
| Gpd1l   | 26.3538 | 26.5885 | 26.2507 | 26.9706 |
| Gpd2    | 28.3132 | 28.7279 | 28.0059 | 27.7155 |
| Gpi     | 29.933  | 30.1467 | 29.9878 | 30.193  |
| Gpnmb   | nd      | nd      | nd      | 23.5762 |
| Gps1    | 22.0817 | 22.2536 | 22.2898 | 22.251  |
| Gpx1    | 28.5441 | 28.6937 | 28.5979 | 28.8053 |
| Gpx3    | 28.8827 | 29.0157 | 29.0884 | 29.1231 |
| Gpx4    | 23.8482 | 24.0331 | 23.5328 | 23.5725 |
| Gpx7    | 23.2458 | 23.4889 | 23.5605 | 23.4879 |
| Grb2    | 24.3122 | 23.317  | 24.3112 | 24.0347 |
| Grhpr   | 26.5418 | 27.0926 | 27.3155 | 27.0922 |
| Grn     | 25.3418 | 24.9719 | 25.8328 | 25.0266 |
| Grpel1  | 22.1558 | 22.5167 | 22.3172 | nd      |
| Gsk3a   | 21.8645 | 22.1711 | 22.4224 | nd      |
| Gsk3b   | 22.8862 | 22.7901 | 22.8005 | 23.0006 |
| Gsn     | 30.5042 | 30.3514 | 30.613  | 30.4171 |

|         |         |         |         |         |
|---------|---------|---------|---------|---------|
| Gsn     | 23.7678 | 24.3998 | 23.976  | 23.6801 |
| Gsr     | 24.8122 | 25.1275 | 24.8291 | 25.0845 |
| Gss     | nd      | 23.6886 | 23.1968 | nd      |
| Gsta3   | 22.4227 | 20.9656 | 23.5445 | 23.0218 |
| Gstk1   | 25.4725 | 25.5518 | 25.6224 | 25.6244 |
| Gstm1   | 31.8407 | 32.026  | 31.9797 | 32.1058 |
| Gstm2   | 29.2323 | 29.3129 | 29.2546 | 29.3153 |
| Gstm5   | 24.5133 | 24.3963 | 24.6929 | 24.5215 |
| Gstm7   | 23.2691 | 23.263  | 22.8571 | 23.406  |
| Gsto1   | 23.482  | 23.8632 | 23.715  | 23.8877 |
| Gstp1   | 30.4461 | 30.4841 | 30.7889 | 30.5544 |
| Gstt1   | 27.3492 | 27.6771 | 27.2069 | 27.7045 |
| Gstt2   | 23.5728 | 23.5541 | 23.7986 | 23.3782 |
| Gstt3   | 25.9549 | 25.982  | 25.7133 | 26.093  |
| Gstz1   | 25.0214 | 24.9353 | 24.6794 | 24.3097 |
| Gtf2i   | 23.633  | 23.4256 | 23.5343 | nd      |
| Gucy1a3 | 27.2925 | 27.3692 | 27.4244 | 27.4633 |
| Gucy1b3 | 25.4789 | 26.0904 | 26.0275 | 26.0834 |
| Gulp1   | 24.6728 | 24.1967 | 24.0046 | 24.2469 |
| Gyg1    | 23.4322 | 23.2963 | 23.9614 | 23.7949 |
| Gys1    | 21.9843 | 22.3559 | nd      | 22.563  |
| H1f0    | 29.0437 | 28.7677 | 28.9654 | 28.8147 |
| H2-Aa   | nd      | nd      | nd      | nd      |
| H2-D1   | 25.4367 | 25.023  | 25.5892 | 25.3434 |
| H2-K1   | nd      | 22.6235 | nd      | 22.9269 |
| H2-Q10  | 24.1915 | 23.2733 | 23.6656 | 22.9939 |
| H2afv   | 27.6275 | 27.0298 | 27.4708 | 27.286  |
| H2afy   | 28.2504 | 28.3818 | 28.4563 | 28.6276 |
| H2afy2  | 24.0416 | 24.2496 | 24.6354 | 24.2199 |
| H3f3a   | 31.8893 | 32.3597 | 31.5719 | 31.8579 |
| H6pd    | 23.9616 | 23.6321 | 23.8308 | 24.5238 |
| Hadh    | 29.6383 | 29.7498 | 28.8666 | 28.8902 |
| Hadha   | 30.523  | 30.9342 | 30.1839 | 30.0543 |
| Hadhb   | 29.6905 | 29.9937 | 29.131  | 28.9549 |
| Hagh    | 22.6689 | 22.6497 | 22.6809 | 23.2574 |
| Hamp    | 22.8594 | 22.823  | 23.2396 | 22.7924 |
| Hapln1  | nd      | 23.9291 | 23.2451 | 24.3758 |
| Hars    | 24.6448 | 24.5694 | 23.4383 | 24.7242 |
| Hax1    | 21.0118 | 21.0915 | nd      | 20.8168 |
| Hba     | 34.7911 | 33.9929 | 34.5808 | 34.0783 |
| Hbb-b1  | 34.8821 | 33.9918 | 34.7734 | 34.1833 |

|           |         |         |         |         |
|-----------|---------|---------|---------|---------|
| Hbb-b2    | 26.7688 | 25.251  | 26.7969 | 24.8856 |
| Hbb-bh1   | 22.9508 | 22.5255 | 23.0887 | 21.8229 |
| Hcfc1     | 23.7235 | 24.107  | 23.6793 | 24.0632 |
| Hdac2     | 22.5046 | 23.3127 | 22.5161 | 23.2884 |
| Hdgf      | 24.4275 | 24.5982 | 24.1059 | 25.0058 |
| Hdgfrp3   | 25.1318 | 25.5624 | 25.3459 | 26.0011 |
| Hdhd2     | 24.5038 | 24.6851 | 24.3854 | 24.6331 |
| Hdlbp     | 25.4626 | 25.4747 | 25.2305 | 25.1525 |
| Hectd1    | 20.1578 | 20.0257 | 20.4662 | 20.6493 |
| Hexa      | 23.2016 | 23.3741 | 23.0978 | 23.041  |
| Hexb      | nd      | 21.9914 | 21.9294 | 21.8757 |
| Hgs       | 21.9064 | 21.5611 | 21.9034 | 22.2082 |
| Hibadh    | 26.6756 | 27.0182 | 26.8054 | 26.9691 |
| Hibch     | 25.7317 | 25.9836 | 25.2146 | 25.0441 |
| Higd1a    | 21.3604 | 21.8592 | 20.9132 | 21.1509 |
| Hint1     | 27.8017 | 27.7081 | 27.7457 | 27.8105 |
| Hint2     | 24.9448 | 24.9968 | 24.6051 | 24.8081 |
| Hip1      | 24.5109 | 24.6317 | 24.2359 | 24.9636 |
| Hist1h1a  | 24.2451 | 24.568  | 23.0285 | 25.756  |
| Hist1h1b  | 25.5866 | 25.9123 | 25.5431 | 25.8623 |
| Hist1h1c  | 29.1558 | 29.4135 | 29.7851 | 29.2806 |
| Hist1h1d  | 23.611  | nd      | 23.6988 | nd      |
| Hist1h1e  | 29.0474 | 28.7107 | 29.1473 | 28.7381 |
| Hist1h2ah | 24.0529 | 25.412  | 24.0336 | 24.8697 |
| Hist1h2bp | 32.8166 | 32.5031 | 32.7548 | 32.3117 |
| Hist1h3a  | 29.885  | 30.0512 | 29.7687 | 30.015  |
| Hist1h3b  | 32.0948 | 32.0756 | 32.0889 | 32.0592 |
| Hist1h4a  | 32.5179 | 32.6924 | 32.4839 | 32.9156 |
| Hist2h2ab | 23.7995 | 23.551  | 23.9822 | 24.2005 |
| Hist2h2ac | 32.7162 | 32.6094 | 32.9032 | 33.2415 |
| Hk1       | 27.7446 | 28.0649 | 28.0265 | 28.1303 |
| Hk2       | 25.5505 | 25.8801 | 24.9869 | 25.0158 |
| Hmbs      | 22.5257 | 22.797  | 22.4839 | 22.6154 |
| Hmgb1     | 29.4169 | 29.2825 | 29.3348 | 29.4007 |
| Hmgb2     | nd      | nd      | 23.8264 | nd      |
| Hmgcl     | 23.48   | 23.8967 | 23.1047 | 23.6445 |
| Hmgcs2    | nd      | 22.7062 | 23.9578 | 23.3276 |
| Hmgn2     | 22.8589 | 22.7524 | 22.5995 | 22.3549 |
| Hmgn5     | 23.4984 | 23.6871 | 22.8564 | 23.2346 |
| Hmox2     | 23.8265 | 23.0507 | 23.1615 | nd      |
| Hnrnpa0   | 21.9575 | 21.639  | 21.8915 | 22.2211 |

|           |         |         |         |         |
|-----------|---------|---------|---------|---------|
| Hnrnpa1   | 24.9244 | 25.1802 | 24.7189 | 24.9835 |
| Hnrnpa2b1 | 28.1521 | 27.8093 | 28.0132 | 27.889  |
| Hnrnpa3   | 28.3982 | 28.16   | 28.3142 | 28.197  |
| Hnrnpab   | 26.5689 | 26.514  | 26.5649 | 26.6351 |
| Hnrnpc    | 24.8181 | 24.7333 | 25.2332 | 24.5247 |
| Hnrnpd    | 27.0779 | 27.1941 | 27.0801 | 27.3311 |
| Hnrnpdl   | 22.7858 | 23.1557 | 23.2562 | 23.1846 |
| Hnrnpf    | 24.9341 | 25.2305 | 25.0567 | 25.6058 |
| Hnrnph1   | 26.7641 | 26.442  | 26.6486 | 26.5667 |
| Hnrnph2   | 24.0223 | 24.2471 | 23.8945 | 24.7211 |
| Hnrnpk    | 28.5602 | 28.8542 | 28.6048 | 28.9657 |
| Hnrnpl    | 27.5299 | 27.6348 | 27.1076 | 27.7431 |
| Hnrnp1l   | 23.4584 | 23.7091 | 22.8245 | 22.7965 |
| Hnrnpm    | 26.9384 | 27.2175 | 27.102  | 27.3261 |
| Hnrnpu    | 28.6885 | 28.794  | 28.7206 | 28.8968 |
| Hnrnpul1  | 23.9901 | nd      | 24.1723 | 24.8326 |
| Hnrnpul2  | 24.7182 | 24.9562 | 24.8941 | 24.9911 |
| Hook3     | 22.0037 | 22.2073 | 22.7788 | 23.4065 |
| Hoxd8     | nd      | 20.8642 | 21.8331 | nd      |
| Hp        | 22.4258 | nd      | nd      | nd      |
| Hp1bp3    | 27.7497 | 27.9268 | 27.7592 | 28.1353 |
| Hpcal1    | 23.1679 | 23.8518 | 23.5575 | 23.8425 |
| Hprt1     | 23.2574 | 24.4226 | 23.4442 | 24.0883 |
| Hpx       | 28.226  | 27.7975 | 28.3298 | 27.6251 |
| Hrg       | 24.213  | 23.9734 | 23.9405 | 24.0884 |
| Hsbp1     | 20.0934 | 24.4802 | nd      | 20.0657 |
| Hsd11b1   | nd      | 21.9999 | nd      | 22.2232 |
| Hsd17b10  | 28.1244 | 28.2071 | 27.752  | 28.0068 |
| Hsd17b11  | 25.3177 | 25.304  | 25.4005 | 25.6724 |
| Hsd17b12  | 25.6758 | 25.9356 | 25.8568 | 25.8227 |
| Hsd17b4   | 22.8955 | 22.3361 | 23.2528 | 22.8118 |
| Hsd12     | 23.7097 | 24.1962 | 22.8967 | 22.6308 |
| Hsp90aa1  | 28.0135 | 28.2416 | 28.118  | 28.1763 |
| Hsp90ab1  | 29.7851 | 29.8472 | 30.0423 | 29.9091 |
| Hsp90b1   | 29.5252 | 29.5117 | 29.6123 | 29.5954 |
| Hspa12a   | 24.1048 | 24.3149 | 25.1069 | 24.4444 |
| Hspa12b   | 25.7721 | 25.8063 | 25.975  | 25.6574 |
| Hspa1a    | 29.1128 | 29.1716 | 29.2014 | 29.4162 |
| Hspa1b    | 24.6542 | 21.8801 | 24.7859 | 25.2789 |
| Hspa2     | 26.9832 | 27.2104 | 27.2381 | 27.4141 |
| Hspa4     | 27.6224 | 27.6753 | 27.6409 | 27.8817 |



|        |         |         |         |         |
|--------|---------|---------|---------|---------|
| Hspa4l | 23.793  | 24.1231 | 24.102  | 24.3881 |
| Hspa5  | 29.6143 | 29.5223 | 29.7922 | 29.536  |
| Hspa8  | 30.956  | 30.9857 | 31.0434 | 31.0755 |
| Hspa9  | 27.9596 | 27.8949 | 27.8256 | 27.3571 |
| Hspb1  | 29.9482 | 29.8834 | 29.9921 | 30.1609 |
| Hspb6  | 26.6339 | 27.0208 | 27.1114 | 27.2712 |
| Hspb7  | 25.4027 | 25.2287 | 25.1814 | 25.8228 |
| Hspb8  | 24.0341 | 24.3869 | 24.2187 | 24.7177 |
| Hspd1  | 29.7126 | 29.8682 | 29.5296 | 29.5057 |
| Hspe1  | 27.8277 | 27.8132 | 27.7473 | 27.7014 |
| Hspg2  | 33.6077 | 33.5642 | 33.6081 | 33.6807 |
| Hsph1  | 24.6913 | 24.8027 | 24.9149 | 25.1415 |
| Htra1  | 27.3898 | 27.2775 | 27.244  | 27.6742 |
| Huwe1  | 23.3088 | 23.9869 | 23.5758 | 24.1626 |
| Hyou1  | 26.4051 | 26.4772 | 26.4579 | 26.3269 |
| lah1   | 22.298  | 22.556  | 22.2323 | 22.2889 |
| lars   | 22.8076 | 22.4237 | 22.7041 | 22.5658 |
| lars2  | 26.2824 | 26.5235 | 25.9079 | 26.3777 |
| lca    | 23.6937 | 23.6308 | 23.7475 | 23.5466 |
| lcam1  | nd      | 22.6262 | 22.992  | 23.2079 |
| lcam2  | nd      | 22.9365 | 22.7203 | 22.3353 |
| lde    | 22.8478 | 22.7837 | 22.5726 | 22.9136 |
| ldh1   | 27.3582 | 27.7358 | 27.3083 | 27.5584 |
| ldh2   | 29.3352 | 29.5055 | 29.1684 | 29.3296 |
| ldh3a  | 29.4652 | 29.6712 | 29.1463 | 28.6751 |
| ldh3g  | 27.1261 | 27.3786 | 26.4543 | 26.4365 |
| lfi35  | 22.0006 | 21.7414 | 21.6741 | 22.2062 |
| lgbp1  | 22.1569 | 22.7667 | 22.4184 | 22.2662 |
| lgfals | 21.0953 | nd      | nd      | 21.6803 |
| lgfbp6 | 23.9832 | 23.8402 | 23.2309 | 24.0163 |
| lgfbp7 | 28.0136 | 28.1045 | 28.1484 | 28.3123 |
| lgh-3  | 25.7965 | 24.771  | 25.7256 | 24.099  |
| lghg1  | 23.0508 | nd      | 22.6792 | 23.0549 |
| lghm   | 26.5625 | 26.1309 | 27.1128 | 27.0464 |
| lgkc   | 26.072  | 25.3593 | 25.8936 | 25.2888 |
| lkbip  | 22.8908 | 23.1793 | 22.9363 | 23.089  |
| lkbip  | 21.9232 | 21.6251 | 21.6509 | 21.9071 |
| lkbkb  | 20.6712 | 21.5514 | 21.0057 | 21.4615 |
| llf2   | 23.9309 | 24.4159 | 24.194  | 24.5342 |
| llf3   | 23.0735 | nd      | 23.768  | 23.2995 |
| llk    | 29.496  | 29.6317 | 29.5357 | 29.7387 |

|         |         |         |         |         |
|---------|---------|---------|---------|---------|
| llvbl   | 21.2398 | 21.2823 | nd      | 22.8102 |
| lmmt    | 28.0037 | 28.0386 | 27.8391 | 27.8334 |
| lmpa1   | 25.1216 | 25.2204 | 25.5816 | 25.047  |
| lnf2    | 23.428  | 23.9922 | 23.4631 | 23.7255 |
| lnmt    | 26.6753 | 26.3747 | 26.4881 | 26.3892 |
| lnpp1   | 24.281  | 24.5667 | 24.3658 | 24.5892 |
| lnpp4a  | 23.6835 | 23.725  | 23.8001 | 23.7728 |
| lnts3   | nd      | 21.1016 | nd      | nd      |
| lpo4    | 21.6848 | 21.8789 | 21.6843 | 22.8756 |
| lpo5    | 25.8449 | 26.0745 | 25.8436 | 25.9726 |
| lpo7    | 24.2156 | 24.6402 | 24.3642 | 25.0686 |
| lpo9    | nd      | 23.0208 | nd      | 22.6464 |
| lqgap1  | 29.186  | 29.3032 | 29.2582 | 29.348  |
| lrf2bpl | 27.0079 | 27.0916 | 27.0718 | 27.3876 |
| lsg15   | nd      | 22.8999 | 21.955  | 22.5654 |
| lslr    | 27.1812 | 27.7514 | 27.5867 | 28.0486 |
| lsoc1   | 21.7868 | 20.2914 | 22.2151 | 22.3626 |
| lsoc2a  | 27.1662 | 27.3082 | 26.8542 | 27.167  |
| lsyna1  | 22.3206 | 23.0161 | 21.864  | 22.8641 |
| ltch    | 21.9254 | 22.2261 | nd      | 22.5116 |
| ltga1   | 23.3116 | 23.3537 | 24.0412 | 24.0322 |
| ltga2b  | 25.1236 | 24.2768 | 22.8353 | 23.9874 |
| ltga3   | 26.0321 | 26.2089 | 26.0311 | 26.4429 |
| ltga5   | 25.8778 | 25.8275 | 25.8626 | 26.1062 |
| ltga6   | nd      | 22.1205 | 23.257  | 22.8736 |
| ltga8   | 30.2287 | 30.2516 | 30.1697 | 30.3914 |
| ltga9   | 25.7963 | 25.9258 | 26.135  | 26.0923 |
| ltgav   | 27.4454 | 27.3635 | 27.3526 | 27.6012 |
| ltgb1   | 30.6726 | 30.752  | 31.0203 | 30.7919 |
| ltgb3   | 25.3313 | 25.263  | 25.3134 | 25.4551 |
| ltgb5   | 26.17   | 25.7919 | 25.9703 | 26.4254 |
| ltgb6   | 26.5245 | 26.8022 | 26.9399 | 26.6244 |
| ltih1   | 25.9708 | 25.8086 | 25.7296 | 26.3521 |
| ltih2   | 24.8469 | 24.4226 | 24.1324 | 25.3732 |
| ltih4   | 25.3198 | 24.8601 | 25.0577 | 25.2413 |
| ltm2b   | nd      | 20.8605 | nd      | 21.0704 |
| ltpa    | 24.7332 | 24.8846 | 24.5773 | 24.1792 |
| ltpr1   | 26.3567 | 26.7547 | 26.3945 | 26.8028 |
| ltpr3   | 23.1078 | 22.8537 | 22.5838 | 22.9636 |
| lvd     | 26.8121 | 26.8837 | 26.1144 | 26.2312 |
| Jak1    | 22.6247 | 23.1023 | 22.7764 | 22.8411 |

|           |         |         |         |         |
|-----------|---------|---------|---------|---------|
| Jph2      | 23.6119 | 24.3774 | 24.1366 | 23.9914 |
| Jup       | 22.5523 | 22.4764 | 22.4107 | 21.8608 |
| Kank2     | 27.2822 | 27.4999 | 27.3728 | 27.5177 |
| Kars      | 24.616  | 24.887  | 24.4431 | 24.463  |
| Katnal2   | 24.7883 | 25.2185 | 24.9048 | 25.2879 |
| Kcmf1     | 23.2036 | 23.3953 | 23.4655 | 23.6786 |
| Kcnk4     | nd      | 26.5009 | 26.5588 | 26.6777 |
| Kdelc2    | 24.9602 | 25.2398 | 25.2472 | 25.664  |
| Kdm1b     | nd      | nd      | nd      | nd      |
| Kdsr      | 22.6856 | nd      | 23.107  | 23.2802 |
| Khdrbs1   | 23.5432 | 24.0553 | 23.9918 | 23.8886 |
| Khsrp     | 25.6404 | 25.3416 | 25.2689 | 25.6333 |
| Kiaa0196  | 22.2604 | 22.7329 | 22.4906 | 22.8377 |
| Kif13a    | 22.6973 | 23.1169 | 22.8047 | 23.1569 |
| Kif3a     | 21.6963 | 21.8648 | nd      | 21.8807 |
| Kif5a     | 23.8521 | 23.9047 | 23.2859 | 24.6038 |
| Kif5b     | 24.6941 | 24.9638 | 24.9647 | 25.074  |
| Klc1      | 23.9528 | 24.3225 | 23.8525 | 24.4605 |
| Klk1b27   | nd      | nd      | 22.1787 | nd      |
| Kmt2a     | 22.8039 | 23.1225 | 24.9397 | nd      |
| Kng1      | 27.269  | 26.6223 | 26.9901 | 26.6199 |
| Kpna4     | 24.89   | 25.1656 | 24.8207 | 25.4299 |
| Kpna6     | 23.839  | 24.7475 | 23.3604 | 25.0865 |
| Kpnb1     | 27.9973 | 28.1447 | 28.0954 | 28.2978 |
| Kras      | 24.4163 | 23.9684 | 24.4026 | 24.5239 |
| Krt33a    | nd      | nd      | nd      | nd      |
| Krt81     | 24.1241 | nd      | 24.6734 | nd      |
| Krt83     | 23.2418 | 21.4988 | nd      | nd      |
| Krt85     | nd      | nd      | nd      | nd      |
| Krtap14   | nd      | nd      | nd      | nd      |
| Krtap15-1 | nd      | nd      | nd      | nd      |
| Krtap19-3 | nd      | nd      | nd      | nd      |
| Krtap19-5 | nd      | nd      | nd      | nd      |
| Krtap3-1  | nd      | nd      | nd      | nd      |
| Krtap7-1  | 25.0695 | nd      | 26.2789 | nd      |
| Krtap8-1  | 19.9139 | nd      | 21.3673 | nd      |
| Ktn1      | nd      | nd      | nd      | 22.2899 |
| L3hypdh   | nd      | nd      | 21.7323 | nd      |
| Lactb2    | 23.0927 | 22.1128 | nd      | 22.975  |
| Lama2     | 26.139  | 26.1203 | 26.8695 | 26.0901 |
| Lama4     | 28.528  | 28.3876 | 28.7542 | 28.4048 |

|          |         |         |         |         |
|----------|---------|---------|---------|---------|
| Lama5    | 29.8356 | 29.8551 | 30.0209 | 29.8672 |
| Lamb1    | 25.0318 | 24.994  | 25.4105 | 25.2609 |
| Lamb2    | 30.7744 | 30.6187 | 30.943  | 30.815  |
| Lamc1    | 29.8607 | 29.6149 | 30.1577 | 29.8813 |
| Lamp1    | 23.2424 | 22.9294 | 22.8884 | 22.6795 |
| Lamp2    | 24.6523 | 24.7529 | 24.9028 | 24.9674 |
| Lamtor1  | 23.4717 | 23.1732 | nd      | 22.7924 |
| Lamtor5  | nd      | 23.6403 | nd      | 22.2899 |
| Lancl2   | nd      | 23.2771 | 22.9631 | 23.3719 |
| Lap3     | 25.279  | 25.3972 | 25.3357 | 25.3033 |
| Lars     | 21.0192 | 21.0568 | 21.41   | 21.0333 |
| Lasp1    | 24.3067 | 24.4825 | 24.941  | 24.142  |
| Lcp1     | 24.4683 | 24.8126 | 25.009  | 24.755  |
| Ldb3     | 27.8558 | 27.8706 | 28.0131 | 28.1589 |
| Ldha     | 29.4212 | 29.6544 | 29.3772 | 29.3679 |
| Ldhb     | 27.1475 | 27.5027 | 27.2138 | 27.0674 |
| Lect1    | 24.0491 | 24.5415 | 24.2303 | 24.5421 |
| Lemd2    | 24.6321 | 24.3293 | 24.4688 | 24.5256 |
| Leprel2  | 21.3869 | 21.563  | 21.7611 | 21.982  |
| Letm1    | 25.9712 | 26.2671 | 25.7154 | 25.9518 |
| Letmd1   | 23.6052 | 25.3985 | 24.2816 | 22.2993 |
| Lgals1   | 31.9256 | 31.8137 | 31.9206 | 31.6984 |
| Lgals3   | 25.7026 | 25.7714 | 26.6464 | 25.9049 |
| Lgals3bp | nd      | 21.0878 | 21.2586 | nd      |
| Lgmn     | 23.3298 | 22.2092 | 23.5341 | 23.3655 |
| Lifr     | 27.1868 | 26.3557 | 27.3565 | 27.044  |
| Limch1   | 23.6156 | 24.1031 | 23.5381 | 23.9831 |
| Lims1    | 27.2123 | 27.3758 | 27.4248 | 27.498  |
| Lims2    | 26.4522 | 26.6753 | 26.8877 | 26.6477 |
| Lipa     | 21.5986 | 22.6982 | 21.5001 | 21.5294 |
| Lipe     | 26.1688 | 26.232  | 24.9913 | 24.8    |
| Lman1    | 25.7698 | 25.7022 | 25.8414 | 25.9004 |
| Lman2    | 24.1647 | 24.359  | 24.0632 | 24.2326 |
| Lmcd1    | 28.7929 | 28.68   | 28.7845 | 28.7507 |
| Lmf2     | 23.9704 | 23.6021 | 23.4828 | 24.3578 |
| Lmna     | 31.5284 | 31.3441 | 31.6757 | 31.2148 |
| Lmnb1    | 27.7056 | 27.8736 | 27.9917 | 27.8903 |
| Lmnb2    | 25.8608 | 25.7335 | 25.7483 | 25.9809 |
| Lmod1    | 28.3047 | 28.4604 | 28.5537 | 28.7372 |
| Lnpep    | 24.4072 | 24.6604 | 24.31   | 24.6237 |
| Lonp1    | 25.3147 | 25.5494 | 25.1635 | 25.6942 |

|          |         |         |         |         |
|----------|---------|---------|---------|---------|
| Lox      | 27.5776 | 27.663  | 27.4237 | 27.4856 |
| Loxl1    | 30.1898 | 29.9933 | 30.137  | 30.063  |
| Loxl3    | 23.0528 | 22.8914 | 23.3473 | 23.0589 |
| Lpl      | 21.4136 | nd      | 21.9272 | 22.6813 |
| Lpp      | 31.0548 | 31.2425 | 31.3335 | 31.3609 |
| Lrp1     | 28.1335 | 28.1941 | 28.215  | 28.3347 |
| Lrpap1   | 24.6938 | 25.0041 | 24.8371 | 25.1411 |
| Lrprrc   | 26.3637 | 26.4095 | 26.1952 | 26.3069 |
| Lrrc17   | 28.0218 | 28.4087 | 27.7234 | 28.1351 |
| Lrrc39   | 22.7658 | 22.8889 | 23.1962 | 22.9282 |
| Lrrc40   | 24.3124 | 24.3675 | nd      | 24.6583 |
| Lrrc4c   | 25.0817 | nd      | 24.4449 | 25.2192 |
| Lrrc59   | 26.3289 | 26.3278 | 26.4956 | 26.7706 |
| Lrrfip1  | 25.3347 | 25.1338 | 24.7276 | 25.3246 |
| Lsm3     | 22.5988 | 22.4548 | 22.0272 | 22.6725 |
| Lsm5     | 21.8915 | nd      | 22.0783 | 22.4849 |
| Lsm7     | 24.6257 | 24.2229 | 23.7669 | 24.6394 |
| Lta4h    | 27.1975 | 27.3709 | 27.2154 | 27.1713 |
| Ltbp1    | 28.5336 | 28.5122 | 28.7107 | 28.7351 |
| Ltbp2    | nd      | nd      | 23.3667 | 23.5165 |
| Ltbp3    | 23.84   | 24.1548 | 24.166  | 23.5957 |
| Ltbp4    | 30.747  | 30.6392 | 30.8683 | 30.6107 |
| Luc7l2   | 22.0294 | 22.2211 | nd      | nd      |
| Luc7l3   | 23.0631 | 23.1409 | 22.6158 | 23.2886 |
| Lum      | 32.6083 | 32.6763 | 32.8719 | 32.947  |
| Lxn      | 25.8361 | 25.444  | 25.6616 | 25.3431 |
| Ly6a     | 23.3556 | 23.1632 | 23.5819 | 23.5724 |
| Ly6c1    | 24.3637 | 24.5866 | 24.0445 | 24.6004 |
| Lypla1   | 26.3513 | 26.6623 | 26.1603 | 26.9969 |
| Lypla2   | 24.8536 | 24.8789 | 24.9722 | 25.6737 |
| Lym5     | 20.6633 | 21.3796 | 20.3281 | nd      |
| M6pr     | 24.3015 | 24.9382 | 24.7448 | 24.6113 |
| Macf1    | 24.2031 | 24.7229 | 24.0717 | 24.4414 |
| Macrod1  | 25.5833 | 25.9624 | 25.7657 | 25.3221 |
| Man2c1   | 22.9553 | 23.7782 | 23.4105 | 23.7009 |
| Manf     | 25.1765 | 25.032  | 24.5485 | 25.5872 |
| Maoa     | 23.3051 | 24.1118 | 24.1985 | 24.3065 |
| Maob     | 26.5596 | 26.7888 | 26.6818 | 26.8874 |
| Map1a    | 25.0549 | 25.8365 | 25.8713 | 25.589  |
| Map1b    | 27.9404 | 28.0598 | 28.3408 | 28.3849 |
| Map1lc3a | 24.0659 | 24.342  | 24.4033 | 24.3586 |

|          |         |         |         |         |
|----------|---------|---------|---------|---------|
| Map1lc3b | 24.8542 | 24.8294 | 25.3547 | 25.3611 |
| Map1s    | 22.3351 | 23.2922 | 23.0162 | 23.3112 |
| Map2k1   | 24.9677 | 24.9208 | 24.699  | 24.7511 |
| Map2k3   | 21.8392 | 22.1855 | nd      | 22.2298 |
| Map2k4   | 22.9619 | 22.7678 | 22.9978 | 22.5136 |
| Map3k19  | 23.8834 | 23.6461 | 23.9745 | 23.6909 |
| Map4     | 26.4855 | 26.4483 | 26.9829 | 26.5813 |
| Map6     | nd      | 23.274  | 23.3988 | 22.7489 |
| Map7d1   | 23.7362 | 23.79   | 24.0619 | 24.1844 |
| Mapk1    | 26.186  | 26.0932 | 25.8469 | 26.0398 |
| Mapk14   | 22.0711 | 21.7864 | nd      | 21.8761 |
| Mapk3    | 24.4028 | 24.7509 | 24.3895 | 25.2456 |
| Mapre1   | 25.4424 | 25.4413 | 25.4987 | 25.4421 |
| Mapre2   | 24.3508 | 24.2855 | 24.231  | 23.8992 |
| Mapre3   | 23.3542 | 23.4397 | 23.2822 | 23.2447 |
| Mars     | nd      | 22.8698 | 22.3406 | 22.2633 |
| Marveld1 | 22.4985 | nd      | 22.5374 | 22.5172 |
| Mat2a    | 22.6165 | 22.2757 | 21.7824 | 22.9469 |
| Matr3    | 26.6223 | 27.0612 | 26.6428 | 27.2069 |
| Mavs     | 25.0856 | 25.0348 | 25.3335 | 25.0296 |
| Mb       | 23.6624 | 24.8374 | 25.6291 | 24.1079 |
| Mbd2     | 21.8846 | 22.0631 | 22.5187 | nd      |
| Mbl1     | 24.0359 | 23.689  | 23.773  | 23.8245 |
| Mbl2     | 21.6253 | 21.133  | nd      | 21.6905 |
| Mbnl1    | 24.9972 | 24.927  | 25.0033 | 24.556  |
| Mboat7   | 22.029  | 22.0683 | 21.696  | 22.1161 |
| Mbp      | 19.1772 | 15.4887 | 29.2157 | nd      |
| Mcam     | 28.6063 | 28.4971 | 28.6777 | 28.5362 |
| Mccc1    | 25.341  | 25.3946 | 24.8919 | 24.9318 |
| Mccc2    | 24.852  | 25.4489 | 24.8763 | 24.8459 |
| Mcee     | 22.8945 | 23.158  | nd      | 23.1663 |
| Mcfd2    | 22.4201 | 23.1451 | 23.2425 | 23.5554 |
| Mcpt3    | 22.6305 | 22.2682 | 23.1987 | 22.4662 |
| Mcpt4    | 27.9691 | 27.6256 | 28.2106 | 28.2687 |
| Mcu      | nd      | 23.6043 | 23.6867 | 23.9075 |
| Mdh1     | 28.5865 | 28.6101 | 28.7998 | 28.4673 |
| Mdh2     | 29.9306 | 30.0605 | 29.77   | 29.4784 |
| Mdp1     | 23.3406 | 23.4895 | 23.5707 | 23.8719 |
| Me1      | 27.2352 | 27.5775 | 27.3044 | 27.3201 |
| Mecp2    | 24.9024 | 25.465  | 25.1742 | 25.5898 |
| Mecr     | 25.6208 | 25.9612 | 24.941  | 25.5001 |

|         |         |         |         |         |
|---------|---------|---------|---------|---------|
| Megf6   | 22.7478 | nd      | 22.0046 | 22.6957 |
| Memo1   | 22.744  | 22.5797 | 22.7466 | 22.8046 |
| Metap2  | nd      | 22.274  | 20.1823 | 22.8238 |
| Mfap2   | 25.8453 | 25.5117 | 26.0794 | 25.5676 |
| Mfap4   | 31.0104 | 31.2536 | 30.8791 | 31.2969 |
| Mfap5   | 26.9915 | 26.6417 | 27.5015 | 26.3667 |
| Mfge8   | 29.6012 | 29.567  | 29.6954 | 29.4481 |
| Mfn2    | 22.8822 | 22.5615 | nd      | 22.7668 |
| Mgl1    | 25.4334 | 25.3964 | 25.4073 | 25.3732 |
| Mgp     | 24.2782 | 24.2841 | 24.6688 | 24.1155 |
| Mgst1   | 24.7991 | 24.8754 | 24.3369 | 23.4751 |
| Mgst3   | 22.1314 | 22.6521 | 22.0415 | 22.1126 |
| Mical1  | 23.7482 | 24.3647 | 24.0691 | 24.378  |
| Mical2  | 23.8922 | 24.3082 | nd      | 24.6378 |
| Micall1 | 22.4567 | 22.3022 | 21.4297 | 23.5698 |
| Mif     | 27.8545 | 28.0279 | 28.0361 | 27.9668 |
| Minos1  | 24.7461 | 25.2222 | 24.7288 | 24.8543 |
| Mlec    | nd      | 22.4444 | 23.0815 | 23.1181 |
| Mmaa    | 21.4804 | 21.5217 | 21.4719 | 21.3076 |
| Mmgt1   | nd      | nd      | 20.2243 | 21.6685 |
| Mms19   | 21.1626 | 22.2899 | 20.9717 | 21.7689 |
| Mns1    | 26.1973 | 23.8452 | 24.7886 | 24.0411 |
| Mogs    | 22.4469 | 22.4659 | 22.7303 | 22.5422 |
| Mp68    | 24.6835 | 25.0108 | 24.844  | 24.7211 |
| Mpc1    | 24.9569 | 25.3797 | 24.588  | 24.2306 |
| Mpc2    | 26.1839 | 26.4381 | 25.9255 | 25.7676 |
| Mpp1    | 24.4377 | 23.3886 | 23.3981 | 23.296  |
| Mpst    | 22.9079 | 22.1918 | 22.6061 | 22.8296 |
| Mpz     | 26.0372 | 23.5228 | 30.3702 | 24.6488 |
| Mrc1    | 26.2844 | 25.9108 | 26.1494 | 26.1798 |
| Mrc2    | 22.6695 | 22.8755 | 22.7295 | 22.8673 |
| Mrgprf  | 23.204  | 23.5301 | 23.3369 | 24.5476 |
| Mri1    | 23.9143 | 24.1668 | 23.5505 | nd      |
| Mrpl12  | 22.4337 | nd      | 22.29   | 22.3631 |
| Mrps36  | 25.1941 | 24.9989 | 24.4857 | 24.1532 |
| Mrvi1   | 23.553  | 23.9187 | 24.3579 | 24.3654 |
| Msn     | 30.4153 | 30.2552 | 30.4235 | 30.0833 |
| Msra    | 23.7232 | nd      | 23.5322 | 22.716  |
| Msrp3   | 25.1368 | 25.0038 | 25.7875 | 24.9234 |
| Mtap    | 26.1189 | 26.2843 | 26.1249 | 26.2645 |
| Mtarc2  | 24.9681 | 24.846  | 24.7508 | 24.998  |

|         |         |         |         |         |
|---------|---------|---------|---------|---------|
| Mtstp8  | 25.8927 | 26.1276 | 25.9841 | 26.2218 |
| Mtch2   | 27.1559 | 27.609  | 27.1583 | 27.4787 |
| Mtco2   | 28.9707 | 29.3833 | 28.7034 | 28.6453 |
| Mtfr1l  | 23.5019 | 23.4964 | nd      | 23.3253 |
| Mthfd1  | 25.4979 | 25.1252 | 25.2571 | 25.4232 |
| Mthfd1l | 21.9705 | 23.449  | 22.2181 | 22.7075 |
| Mtnd4   | 22.4692 | nd      | nd      | 22.3558 |
| Mtnd5   | 22.417  | 22.7372 | 21.9338 | 22.2751 |
| Mtor    | 22.2229 | 22.0439 | 22.3302 | 22.3526 |
| Mtpn    | 27.0402 | 27.1916 | 27.2255 | 27.3204 |
| Mtx1    | 22.764  | 23.0197 | 20.4728 | nd      |
| Mtx2    | 24.711  | 24.8061 | 24.3464 | 24.195  |
| Mug1    | 28.7579 | 28.1939 | 28.4971 | 28.3332 |
| Mup9    | nd      | nd      | nd      | nd      |
| Mut     | 23.9686 | 23.8982 | 23.3294 | 23.2636 |
| Mvp     | 26.8905 | 27.0097 | 27.0488 | 27.1486 |
| Myadm   | 24.7223 | 24.538  | 24.6887 | 24.8285 |
| Mybbp1a | 24.9445 | 24.9806 | 24.7258 | 25.5701 |
| Mycbp   | 22.1984 | 22.4923 | 22.6241 | 22.8267 |
| Myd88   | 20.9313 | 21.0634 | 21.2205 | 21.3226 |
| Myg1    | 21.8685 | 22.3475 | nd      | 22.3892 |
| Myh10   | 30.0364 | 30.1034 | 30.2285 | 30.1354 |
| Myh11   | 34.6617 | 34.4216 | 34.865  | 34.5178 |
| Myh11   | 23.3655 | 23.0032 | 23.7853 | 22.6879 |
| Myh14   | 26.9872 | 26.5945 | 27.1704 | 26.3525 |
| Myh4    | 22.7978 | 24.0952 | 25.1543 | 22.9476 |
| Myh9    | 29.1401 | 28.9753 | 29.0493 | 29.0056 |
| Myl1    | 26.7003 | 26.5845 | 27.3642 | 26.6125 |
| Myl12b  | 27.1928 | 27.3376 | 27.6615 | 27.4832 |
| Myl6    | 31.9303 | 31.8944 | 32.1846 | 32.0671 |
| Myl6    | 26.5863 | 26.2618 | 27.2937 | 26.7589 |
| Myl9    | 30.8633 | 30.6402 | 30.892  | 30.867  |
| Mylk    | 30.3349 | 30.4134 | 30.4777 | 30.3108 |
| Myo18a  | nd      | 23.0771 | 22.6055 | 22.774  |
| Myo1a   | nd      | 23.3041 | 22.9221 | nd      |
| Myo1c   | 30.1952 | 30.2721 | 30.3176 | 30.4325 |
| Myo1d   | 25.1566 | 25.4466 | 24.9754 | 25.7527 |
| Myo9b   | 21.8169 | 21.717  | 22.1588 | 22.8163 |
| Myof    | 27.3421 | 27.4439 | 27.5191 | 27.7642 |
| N/A     | 22.9584 | 22.9944 | 23.3903 | 22.9395 |
| N/A     | 20.962  | 20.4247 | 20.9151 | 21.5743 |



|         |         |         |         |         |
|---------|---------|---------|---------|---------|
| N/A     | 28.1454 | 27.8244 | 28.3384 | 27.4228 |
| N/A     | 24.1289 | 23.9305 | 24.8605 | 25.101  |
| N/A     | 24.9176 | 24.2415 | 25.5378 | 24.8355 |
| N/A     | 23.13   | 23.4898 | 23.4021 | 23.0068 |
| N/A     | 23.9789 | 23.9586 | 23.4531 | 24.3742 |
| N/A     | 24.1289 | 24.4803 | 24.0245 | 24.4798 |
| N6amt1  | nd      | 22.7243 | 22.6726 | 23.1043 |
| Naa15   | nd      | 21.658  | nd      | 20.9543 |
| Naalad2 | 24.9186 | 25.2025 | 24.8168 | 25.4091 |
| Naca    | 23.9974 | 25.1143 | 24.3617 | 24.3749 |
| Nae1    | 21.0397 | 22.7659 | 22.4727 | 21.8416 |
| Naga    | 23.9754 | 24.4556 | 23.8923 | 24.941  |
| Nampt   | 25.04   | 25.1188 | 24.8297 | 25.1011 |
| Nap1l1  | 25.6022 | 25.7498 | 25.8936 | 25.9548 |
| Nap1l4  | 24.8546 | 25.1087 | 25.0902 | 25.0829 |
| Napa    | 24.749  | 24.6622 | 24.7987 | 24.8144 |
| Napg    | 23.0189 | 22.8345 | 22.4348 | 23.3762 |
| Naprt   | 23.1306 | 23.1714 | 22.7598 | 23.5088 |
| Nars    | 23.4663 | 24.0542 | 23.9396 | 24.1578 |
| Ncald   | 22.3084 | 22.0355 | 23.1725 | 22.8302 |
| Ncam1   | 25.8902 | 25.9054 | 26.1132 | 26.0039 |
| Nceh1   | nd      | 23.9041 | 23.5983 | 23.82   |
| Nckap1  | 24.8783 | 25.124  | 24.9417 | 25.4056 |
| Ncl     | 27.0156 | 27.1511 | 26.9646 | 27.0464 |
| Ncln    | 22.9118 | 22.7404 | 22.488  | 22.6645 |
| Ndrg1   | 25.3097 | 25.8529 | 26.2954 | 26.0405 |
| Ndrg2   | 26.8801 | 27.2432 | 27.2127 | 27.6296 |
| Ndufa1  | 21.8614 | 22.4776 | 21.9643 | nd      |
| Ndufa10 | 26.8523 | 27.0493 | 26.5319 | 26.5022 |
| Ndufa11 | nd      | 23.1086 | 22.8355 | 22.5757 |
| Ndufa12 | 24.8901 | 25.4005 | 25.0885 | 24.2874 |
| Ndufa13 | 24.7512 | 25.1119 | 24.6315 | 24.859  |
| Ndufa2  | 22.6537 | 23.4414 | 22.2287 | 22.6018 |
| Ndufa3  | 24.4998 | 24.8774 | 24.3482 | 24.1598 |
| Ndufa4  | 26.5787 | 26.8243 | 26.4919 | 25.7958 |
| Ndufa5  | 22.9356 | 23.6777 | 22.7833 | 22.8371 |
| Ndufa6  | 25.0277 | 25.2438 | 24.6155 | 24.7139 |
| Ndufa8  | 26.3989 | 26.4335 | 26.2362 | 25.6805 |
| Ndufa9  | 26.1354 | 26.411  | 25.9869 | 26.1368 |
| Ndufaf4 | 21.7953 | 21.9444 | 22.003  | nd      |
| Ndufaf7 | nd      | nd      | 20.7276 | 20.0301 |

|         |         |         |         |         |
|---------|---------|---------|---------|---------|
| Ndufb1  | 25.565  | 25.8821 | 25.1627 | 25.4493 |
| Ndufb10 | 25.5112 | 25.5183 | 24.8446 | 24.7759 |
| Ndufb3  | 23.9898 | 24.2567 | 23.5566 | 23.4712 |
| Ndufb4  | 25.1222 | 25.2458 | 24.9882 | nd      |
| Ndufb5  | 23.1123 | 23.4679 | 22.1553 | 22.6365 |
| Ndufb6  | 22.9735 | 23.3303 | 22.85   | 23.6499 |
| Ndufb7  | 23.6903 | 23.9773 | 22.6217 | nd      |
| Ndufb9  | 24.6341 | 25.191  | 24.2374 | 24.4099 |
| Ndufc2  | 24.9587 | 25.2963 | 24.7764 | 24.6331 |
| Ndufs1  | 27.2658 | 27.6363 | 26.8833 | 26.6734 |
| Ndufs2  | 26.7686 | 26.7667 | 26.4752 | 26.3928 |
| Ndufs3  | 25.8855 | 26.0739 | 25.0502 | 25.3973 |
| Ndufs4  | 24.4658 | 25.0091 | 23.9115 | 24.4225 |
| Ndufs5  | 25.0781 | 25.3949 | 25.273  | 25.3111 |
| Ndufs6  | 23.9103 | 23.8586 | 24.0287 | nd      |
| Ndufs7  | 24.9272 | 25.4276 | 24.5818 | 24.6729 |
| Ndufs8  | 25.5494 | 25.9159 | 25.5519 | 25.2889 |
| Ndufv1  | 26.9516 | 27.2281 | 26.6572 | 26.3656 |
| Ndufv2  | 25.0115 | 24.8742 | 24.7628 | 24.1528 |
| Ndufv3  | 21.4927 | 21.0205 | 21.3658 | 20.7619 |
| Ndbl    | nd      | 23.8666 | 23.6646 | 24.9017 |
| Nedd4   | 26.8605 | 26.8474 | 26.93   | 27.0214 |
| Nedd8   | 23.7641 | 24.5285 | 24.481  | 25.2529 |
| Nefm    | 21.0655 | 20.015  | 27.3605 | nd      |
| Nelfcd  | 27.5105 | 26.8767 | 27.6835 | 26.4875 |
| Nes     | 23.342  | 23.261  | 23.4118 | 23.4477 |
| Nexn    | 22.9686 | 22.8895 | 22.5425 | 23.0521 |
| Nfib    | 22.4947 | 21.2975 | 22.6174 | nd      |
| Nfic    | 22.7576 | 22.4385 | 22.5313 | 22.9359 |
| Nfix    | 24.2395 | 24.2541 | 23.7281 | 24.0783 |
| Nfu1    | 22.3726 | 23.2341 | 23.114  | 23.0171 |
| Ngef    | 23.0532 | 23.4197 | 23.0891 | 23.4639 |
| Nhp2l1  | 24.2343 | 24.091  | 24.3844 | 24.8323 |
| Nid1    | 28.7255 | 28.5209 | 28.9853 | 28.7143 |
| Nid2    | 26.4564 | 26.2628 | 26.7589 | 26.657  |
| Nif3l1  | 21.8182 | 22.6171 | 22.0169 | 22.6412 |
| Ninj1   | 24.2509 | 24.0422 | 23.6775 | 24.1003 |
| Nit1    | 24.7415 | 24.6803 | 24.5548 | 25.0405 |
| Nit2    | 30.6031 | 30.7098 | 29.9473 | 30.6045 |
| Nlrx1   | 23.1593 | nd      | 22.8262 | 23.6283 |
| Nme1    | 25.0187 | 24.8244 | 25.1248 | 24.9889 |

|        |         |         |         |         |
|--------|---------|---------|---------|---------|
| Nme2   | 28.7754 | 28.5742 | 28.8266 | 28.5956 |
| Nme3   | 21.5822 | 21.867  | nd      | 21.7204 |
| Nmral1 | 22.1551 | 22.5344 | 22.6472 | nd      |
| Nmt1   | 24.5185 | 25.0953 | 24.5584 | 24.8383 |
| Nnt    | 26.929  | 27.0841 | 27.2474 | 27.1989 |
| Nono   | 25.4652 | 25.555  | 25.1304 | 25.6502 |
| Nop58  | 23.4348 | 23.6686 | 23.0802 | 23.5983 |
| Notch3 | nd      | 20.9613 | 20.7273 | 21.125  |
| Nov    | 25.2697 | 25.0066 | 25.1413 | 24.8122 |
| Npepl1 | 23.8698 | 23.7351 | nd      | 23.9449 |
| Npepps | 25.9734 | 26.2257 | 26.1385 | 26.2161 |
| Npm1   | 26.2882 | 26.4522 | 26.3272 | 26.5575 |
| Npnt   | 24.5339 | 23.8824 | 24.5631 | 24.1376 |
| Npnt   | 29.4042 | 29.3119 | 29.4343 | 29.1291 |
| Nptn   | 25.5975 | 25.5267 | 25.6704 | 25.5097 |
| Nqo1   | 24.7969 | 24.8386 | 24.638  | 24.6886 |
| Nqo2   | 23.9558 | 23.7028 | 23.7591 | 24.1538 |
| Nsf    | 23.9994 | 24.6023 | 24.5216 | 24.7426 |
| Nsfl1c | 24.6319 | 23.9506 | 24.4994 | 24.6628 |
| Nt5c   | 25.2607 | 25.5073 | 25.0644 | 25.2536 |
| Nt5e   | nd      | 23.8622 | 24.6702 | 24.2185 |
| Ntn1   | 25.9285 | 25.9173 | 25.7753 | 25.9247 |
| Nucb1  | 25.0957 | 24.803  | 24.8597 | 24.521  |
| Nucb2  | 22.8317 | 22.6641 | 23.2653 | 23.0856 |
| Nudc   | 24.6274 | 24.7471 | 24.6182 | 24.603  |
| Nudt11 | 22.2204 | 22.5882 | nd      | 22.6665 |
| Nudt16 | 22.5377 | 22.9588 | 22.813  | 23.1418 |
| Nudt18 | 20.591  | 20.9666 | 20.876  | 20.5908 |
| Nudt21 | 24.7632 | 24.7746 | 24.3845 | 24.9528 |
| Nudt6  | 23.7953 | 24.4142 | 24.581  | 24.591  |
| Nudt7  | 20.2563 | 21.5574 | 20.3851 | nd      |
| Numa1  | 23.5808 | 22.8772 | 22.5692 | 23.7618 |
| Nup133 | 22.8868 | 22.8312 | 22.6468 | 22.963  |
| Nup155 | 21.6868 | 21.717  | 22.0623 | 21.8822 |
| Nup160 | 22.4965 | 22.0636 | 22.2594 | nd      |
| Nup93  | 22.2821 | 21.4752 | 22.4362 | 22.4475 |
| Nutf2  | 26.8721 | 27.0089 | 26.8797 | 27.116  |
| Nynrin | 25.329  | 25.4806 | 25.1892 | 25.8006 |
| Oat    | 27.953  | 28.2569 | 28.0395 | 28.2944 |
| Ociad1 | nd      | 23.2433 | 21.8807 | 22.7547 |
| Ogdh   | 29.8546 | 30.1844 | 29.3652 | 29.259  |

|          |         |         |         |         |
|----------|---------|---------|---------|---------|
| Ogn      | 32.4996 | 32.363  | 32.5028 | 32.64   |
| Ola1     | 26.0455 | 26.363  | 26.1877 | 26.4305 |
| Omd      | 25.4823 | 26.2084 | 25.6073 | 26.3627 |
| Opa1     | 25.5643 | 25.8213 | 25.6135 | 25.2718 |
| Orm1     | 24.4497 | 24.0156 | 24.2099 | 23.794  |
| Osbp     | 23.7469 | 24.1479 | 24.1618 | 24.2078 |
| Osbpl11  | 22.2016 | nd      | 21.3028 | 22.4072 |
| Osbpl3   | 23.0546 | 23.3073 | nd      | 23.5683 |
| Osbpl9   | 22.3307 | 22.5887 | 22.8779 | 22.3815 |
| Osgep    | 22.9781 | 23.284  | 22.3843 | 23.095  |
| Ostc     | 24.4807 | 24.1889 | 24.5954 | 24.7272 |
| Ostf1    | 25.3105 | 25.5351 | 25.5422 | 25.7259 |
| Otub1    | 26.2034 | 26.1958 | 26.2391 | 26.5094 |
| Oxct1    | 28.374  | 28.5805 | 28.2242 | 28.3838 |
| Oxsr1    | 23.7116 | 23.7051 | 23.8919 | 23.772  |
| P4hb     | 28.8432 | 28.8678 | 29.0468 | 28.858  |
| Pa2g4    | 24.5974 | 24.5753 | 24.673  | 24.4889 |
| Pabpc1   | 26.5468 | 26.7552 | 26.2781 | 26.7409 |
| Pabpn1   | 23.259  | 22.6112 | 23.8473 | nd      |
| Pacsin2  | 25.5802 | 25.4928 | 25.4453 | 25.3744 |
| Pafah1b1 | 23.8681 | 23.5039 | 24.1081 | 22.291  |
| Pafah1b2 | 25.8252 | 26.0363 | 25.8298 | 26.1756 |
| Paics    | 24.3662 | 24.8307 | 24.1806 | 24.6819 |
| Pak2     | 24.3566 | 24.8213 | 24.6167 | 25.1055 |
| Palld    | 25.5014 | 25.6823 | 25.8041 | 26.3483 |
| Palm     | 23.0858 | 22.991  | 22.786  | 23.3122 |
| Paox     | nd      | 23.103  | 22.5    | 22.761  |
| Papln    | 23.4677 | 23.4383 | 23.4293 | 24.1848 |
| Papss2   | 23.6484 | 23.8153 | 23.1741 | 23.8949 |
| Park7    | 28.6989 | 28.8366 | 28.9521 | 28.949  |
| Parp12   | nd      | 20.2435 | 20.4055 | nd      |
| Parp3    | 24.3916 | 25.4204 | 24.8149 | 25.3846 |
| Parva    | 27.889  | 28.0009 | 27.7893 | 28.0843 |
| Parvb    | 21.4153 | 20.6702 | nd      | 19.6524 |
| Pawr     | 25.8912 | 26.0581 | 25.7386 | 25.9492 |
| Pbrm1    | 20.5127 | nd      | 20.1217 | 20.2442 |
| Pbxip1   | 26.3268 | 26.2026 | 26.1902 | 26.6369 |
| Pc       | 27.9079 | 28.1497 | 27.6569 | 27.4893 |
| Pcbp1    | 27.6367 | 27.619  | 27.4348 | 27.9148 |
| Pcbp2    | 26.0828 | 25.9895 | 25.553  | 26.0829 |
| Pcca     | 25.1619 | 25.0087 | 24.4667 | 24.8463 |

|         |         |         |         |         |
|---------|---------|---------|---------|---------|
| Pccb    | 25.7408 | 25.857  | 25.4784 | 25.2068 |
| Pck2    | 25.1126 | 25.2265 | 24.9604 | 25.0264 |
| Pcmt1   | 25.8807 | 26.1059 | 26.3336 | 26.1779 |
| Pcolce  | 25.2485 | 25.2398 | 25.4255 | 25.4768 |
| Pcyox1  | 23.64   | 24.345  | 24.0849 | 24.0459 |
| Pcyox1l | 22.5542 | 22.8951 | 22.599  | 22.8561 |
| Pcyt1a  | 22.211  | 21.1395 | nd      | 21.564  |
| Pdcd10  | 23.8626 | 24.7314 | 24.5284 | 24.8264 |
| Pdcd5   | 24.8732 | 24.6783 | 25.2461 | 25.0097 |
| Pdcd6   | 26.7087 | 26.5501 | 26.5641 | 26.4297 |
| Pdcd6ip | 27.533  | 27.6055 | 27.3135 | 27.6732 |
| Pddc1   | 22.4196 | nd      | 22.6455 | 22.0694 |
| Pde3a   | 25.315  | 25.7153 | 25.3642 | 25.5729 |
| Pde5a   | 22.4916 | 22.6693 | 22.0458 | 23.1535 |
| Pdgfrb  | 24.2223 | 24.1783 | 24.6879 | 25.0191 |
| Pdha1   | 27.416  | 27.6559 | 27.0387 | 26.8305 |
| Pdhb    | 27.9679 | 28.4815 | 27.649  | 27.5442 |
| Pdhx    | 22.9884 | 23.6166 | 22.9782 | nd      |
| Pdia3   | 30.0903 | 30.0739 | 30.132  | 30.1765 |
| Pdia4   | 26.8843 | 26.6134 | 26.8623 | 26.8663 |
| Pdia5   | 22.7843 | 22.4801 | 22.5636 | 22.6431 |
| Pdia6   | 27.0507 | 27.1588 | 27.1918 | 27.1883 |
| Pdk1    | 21.8051 | 23.2357 | 21.9995 | nd      |
| Pdk2    | 22.0962 | 22.2511 | 21.8609 | nd      |
| Pdk3    | 24.1022 | 24.5239 | 24.4139 | 24.8384 |
| Pdlim1  | 29.0201 | 29.0762 | 29.2623 | 29.1016 |
| Pdlim3  | 28.2445 | 28.0989 | 28.348  | 28.3692 |
| Pdlim4  | 26.6072 | 26.8566 | 26.6225 | 26.9319 |
| Pdlim5  | 27.666  | 27.6248 | 27.8341 | 27.7374 |
| Pdlim7  | 29.4205 | 29.6422 | 29.6322 | 29.6988 |
| Pdp1    | 21.4397 | 21.7718 | 21.7066 | 22.3217 |
| Pds5a   | nd      | 21.4222 | 20.8469 | 21.7165 |
| Pds5b   | 24.3045 | 24.1301 | 23.8927 | 24.4693 |
| Pdss2   | 27.9578 | 27.6425 | 28.1332 | 27.607  |
| Pdxdc1  | 22.1219 | 22.3706 | 22.3267 | 22.7542 |
| Pdxk    | 25.3447 | 25.4562 | 25.5287 | 25.6079 |
| Pea15   | 25.4859 | 25.4112 | 25.6356 | 25.5339 |
| Pebp1   | 29.2148 | 29.2649 | 29.4346 | 29.5123 |
| Pecam1  | 23.9867 | 24.4468 | 24.1301 | 24.4491 |
| Pef1    | 25.3339 | 25.2687 | 25.0448 | 25.2984 |
| Pepd    | 19.8685 | 22.1197 | 22.0512 | 22.7552 |

|         |         |         |         |         |
|---------|---------|---------|---------|---------|
| Pex19   | 21.1759 | 21.1987 | nd      | 20.6098 |
| Pex5    | 19.7758 | 19.8193 | 19.357  | 19.6673 |
| Pf4     | 25.9995 | 25.4315 | 25.2582 | 25.2188 |
| Pfdn2   | 23.8553 | 23.8743 | 24.0617 | 24.4767 |
| Pfdn5   | 23.5787 | 23.7642 | 23.9409 | 24.214  |
| Pfdn6   | 22.7175 | 23.4328 | nd      | 24.0045 |
| Pfkl    | 25.4465 | 25.897  | 25.3903 | 25.4392 |
| Pfkm    | 25.6615 | 26.0638 | 25.7024 | 25.4547 |
| Pfkp    | 27.3855 | 27.6565 | 27.5953 | 27.7727 |
| Pfn1    | 29.8765 | 29.9798 | 30.0099 | 30.0022 |
| Pgam1   | 28.4759 | 28.6557 | 28.6114 | 28.5983 |
| Pgd     | 26.8445 | 27.1193 | 26.8323 | 27.0972 |
| Pgk1    | 28.7646 | 28.8652 | 28.9166 | 28.7208 |
| Pgl5    | 27.7892 | 28.127  | 27.8334 | 28.039  |
| Pgm1    | 27.9616 | 27.9838 | 27.7362 | 27.6603 |
| Pgm2    | 21.7159 | 21.9364 | 21.4531 | 21.9909 |
| Pgm3    | nd      | 22.5606 | nd      | 22.7188 |
| Pgm5    | 30.5509 | 30.7727 | 30.6303 | 30.7742 |
| Pgp     | 24.1631 | 24.5758 | 24.1323 | 24.4669 |
| Pgrmc1  | 26.2012 | 26.2647 | 26.5641 | 26.3243 |
| Pgrmc2  | 23.5842 | 24.2261 | 21.7705 | 24.4205 |
| Phb     | 27.9701 | 28.0624 | 27.709  | 27.8553 |
| Phb2    | 26.7648 | 26.7786 | 26.5176 | 26.3981 |
| Phgdh   | 22.128  | 21.6537 | 22.3005 | 22.438  |
| Phyhd1  | nd      | nd      | nd      | 20.1835 |
| Pi15    | 25.9151 | 26.3111 | 26.0278 | 26.5159 |
| Pi4ka   | 23.5456 | 23.799  | 23.5565 | 24.2535 |
| Picalm  | 27.0783 | 27.3079 | 27.1561 | 27.6282 |
| Pigs    | nd      | 22.4821 | 22.4624 | 23.8609 |
| Pik3r1  | nd      | 21.6263 | nd      | nd      |
| Pin1    | 23.2663 | 23.4399 | 22.6003 | 22.8293 |
| Pip4k2a | 20.9482 | nd      | 21.4453 | 21.4981 |
| Pir     | 20.7804 | 21.3504 | 21.5987 | 21.3944 |
| Pitpna  | 25.0877 | 25.2527 | 25.4557 | 25.7284 |
| Pitpnb  | 22.4051 | 23.0926 | 22.9404 | 23.1019 |
| Pitrm1  | 24.5829 | 24.5936 | 24.1847 | 24.8243 |
| Pkm     | 31.1872 | 31.3333 | 31.2615 | 31.2297 |
| Pkm     | 27.384  | 27.7865 | 27.6063 | 27.6723 |
| Pkn1    | 21.2648 | 22.0104 | 21.807  | 22.0745 |
| Pla2g16 | nd      | 19.7125 | 19.6832 | 19.7809 |
| Pla2g4a | 24.0987 | 24.2382 | 23.6618 | 24.1804 |

|          |         |         |         |         |
|----------|---------|---------|---------|---------|
| Plcb1    | 22.6333 | nd      | nd      | 23.092  |
| Plcb3    | 23.5047 | 24.0555 | 23.8416 | 23.9244 |
| Plcd1    | 27.4527 | 27.5648 | 27.2975 | 27.6256 |
| Plec     | 29.068  | 29.0893 | 29.1946 | 29.4699 |
| Plg      | 27.0929 | 26.7114 | 26.7071 | 27.0016 |
| Plin1    | 28.6261 | 28.5844 | 27.8166 | 27.5317 |
| Plin3    | 26.1681 | 26.4584 | 25.99   | 26.5091 |
| Plin4    | 28.2187 | 28.237  | 28.257  | 28.3144 |
| Plod3    | 22.2439 | 22.871  | 23.1738 | 22.4497 |
| Plp2     | 23.8752 | 24.5195 | 24.0804 | 24.3348 |
| Pls3     | 30.0034 | 30.1527 | 30.0616 | 30.178  |
| Plscr3   | 22.4211 | 22.8325 | 23.2124 | 23.081  |
| Plxdc2   | 22.7207 | 22.297  | 22.6229 | 22.7938 |
| Plxnb2   | 23.7321 | 23.3026 | 23.5118 | 23.9417 |
| Pml      | 21.5535 | 21.8879 | 21.8832 | 21.7619 |
| Pmpca    | 24.6104 | 25.0626 | 24.2002 | 24.7445 |
| Pnn      | nd      | 22.0025 | 22.0656 | 22.0179 |
| Pnp      | 25.7483 | 26.0326 | 25.8462 | 26.0561 |
| Podn     | 24.984  | 25.2701 | 24.8147 | 25.733  |
| Pofut2   | 22.3074 | 23.0333 | 23.1002 | 22.9887 |
| Poglut1  | 22.4527 | 22.7907 | 22.7698 | 22.8263 |
| Polr2h   | 22.1491 | 22.4611 | 22.3933 | 22.2459 |
| Pon1     | 22.9236 | nd      | 22.9251 | 22.4389 |
| Pon2     | 21.0967 | 22.0844 | 21.6328 | 22.5678 |
| Pon3     | 26.3522 | 26.4291 | 26.1232 | 26.4932 |
| Por      | 26.5145 | 26.8596 | 26.7012 | 26.8292 |
| Postn    | 32.7893 | 32.7689 | 32.8296 | 32.9628 |
| Postn    | 24.5554 | 24.0988 | 25.071  | 24.0895 |
| Ppa1     | 25.9659 | 25.6635 | 25.6513 | 25.6893 |
| Ppa2     | 24.8174 | 25.2224 | 25.1375 | 24.9124 |
| Ppia     | 31.3642 | 31.3538 | 31.5202 | 31.4133 |
| Ppib     | 27.8081 | 27.7228 | 27.9478 | 27.8751 |
| Ppic     | 24.4245 | 24.672  | 24.1956 | 24.4706 |
| Ppid     | 24.4087 | 24.5478 | 24.1835 | 24.6511 |
| Ppl      | 23.1238 | 23.5059 | 23.2601 | 23.3268 |
| Ppm1b    | 22.2055 | 21.6296 | 22.2939 | 21.9891 |
| Ppme1    | 23.2626 | 23.5866 | 22.7976 | 23.2584 |
| Ppp1ca   | 24.374  | 24.2924 | 23.8731 | 24.1762 |
| Ppp1cb   | 28.6684 | 28.6947 | 28.6145 | 28.7431 |
| Ppp1cc   | 21.5558 | 21.9771 | 22.1746 | 21.5626 |
| Ppp1r12a | 28.0855 | 28.2586 | 28.3255 | 28.3009 |

|          |         |         |         |         |
|----------|---------|---------|---------|---------|
| Ppp1r12b | 24.1686 | 23.5999 | 24.1578 | 23.8404 |
| Ppp1r12c | 23.3049 | 23.5989 | 23.9118 | 23.3625 |
| Ppp1r14a | 26.6506 | 26.6169 | 26.4607 | 26.9364 |
| Ppp1r7   | 25.3349 | 25.4959 | 25.4064 | 25.4471 |
| Ppp2ca   | 26.1076 | 26.0743 | 26.0682 | 26.1789 |
| Ppp2r1a  | 28.5124 | 28.6388 | 28.4622 | 28.7348 |
| Ppp2r2a  | 24.7057 | 24.8611 | 24.7299 | 24.7101 |
| Ppp2r4   | 25.9021 | 26.1174 | 25.9975 | 26.1059 |
| Ppp2r5a  | 22.505  | 22.9101 | 22.2635 | 22.988  |
| Ppp2r5c  | 22.8691 | 23.4696 | 23.2631 | 23.4238 |
| Ppp6c    | nd      | 22.2775 | 21.9616 | 22.1801 |
| Ppp6r3   | 20.1383 | 20.7369 | 20.2888 | nd      |
| Ppt1     | 24.8484 | 24.6972 | 24.2693 | 25.1929 |
| Praf2    | 23.1311 | 23.564  | 23.3307 | 23.1556 |
| Prdx1    | 29.4311 | 29.6152 | 29.5258 | 29.5896 |
| Prdx2    | 28.6008 | 28.1822 | 28.4243 | 28.1343 |
| Prdx3    | 26.682  | 26.5982 | 26.5832 | 25.9641 |
| Prdx4    | 26.7484 | 26.8938 | 26.7876 | 26.8284 |
| Prdx5    | 28.4499 | 28.4619 | 28.3259 | 28.386  |
| Prdx6    | 28.4337 | 28.5875 | 28.4566 | 28.5829 |
| Prelp    | 31.7796 | 31.9212 | 32.1365 | 32.2815 |
| Prep     | 23.566  | 23.6655 | 23.5506 | 23.6003 |
| Prkaa1   | 24.0633 | 24.0026 | 24.3124 | 24.1936 |
| Prkaca   | 24.4955 | 24.4513 | 23.9974 | 24.744  |
| Prkag1   | 24.5495 | 24.7202 | 24.3167 | 24.5916 |
| Prkar1a  | 25.3785 | 25.4633 | 25.4324 | 25.7954 |
| Prkar2a  | 23.9168 | 23.9351 | 23.9447 | 24.3874 |
| Prkar2b  | 24.689  | 24.5904 | 24.0531 | 23.8574 |
| Prkca    | 21.9864 | 22.7372 | 22.7629 | 22.4554 |
| Prkcd    | 24.087  | nd      | 23.1778 | 23.3117 |
| Prkcdbp  | 28.8609 | 28.94   | 29.1663 | 28.917  |
| Prkcsh   | 24.3333 | 24.2612 | 24.0326 | 23.8046 |
| Prkg1    | 25.5435 | 25.7091 | 25.5565 | 25.6974 |
| Prkra    | 21.6772 | 20.0257 | 22.0724 | 22.3078 |
| Proc     | 21.3891 | 21.1572 | nd      | 21.1355 |
| Procr    | 23.4134 | 23.3302 | 22.8191 | 23.3897 |
| Prosc    | 24.4824 | 24.6725 | 24.8754 | 24.6801 |
| Prpf19   | 23.7246 | 24.1784 | 24.2986 | 24.1129 |
| Prpf8    | 24.7394 | 25.011  | 24.9103 | 24.9956 |
| Prph     | 24.8578 | 24.1595 | 27.47   | 26.1717 |
| Prps1    | 23.7138 | 24.777  | 23.982  | 24.6221 |



|         |         |         |         |         |
|---------|---------|---------|---------|---------|
| Prpsap1 | 23.5229 | 23.9971 | 23.8572 | 24.3415 |
| Prrc1   | 21.9771 | 22.0631 | 21.9308 | 22.9193 |
| Psap    | 26.7028 | 26.2647 | 26.4569 | 26.315  |
| Psip1   | 24.3135 | 24.2912 | 24.2285 | 24.7193 |
| Psma1   | 26.8439 | 26.9776 | 26.6653 | 27.1598 |
| Psma2   | 26.2743 | 26.3846 | 26.1607 | 26.4166 |
| Psma3   | 25.2756 | 25.3563 | 25.3669 | 25.25   |
| Psma4   | 25.5091 | 25.4104 | 24.9278 | 25.4464 |
| Psma5   | 26.3132 | 26.1019 | 26.3263 | 26.2763 |
| Psma6   | 26.0607 | 25.971  | 25.8156 | 25.7102 |
| Psma7   | 26.1873 | 26.1787 | 26.0593 | 25.9013 |
| Psemb1  | 26.8994 | 27.148  | 26.9195 | 27.2714 |
| Psemb2  | 26.1599 | 26.3383 | 26.2458 | 26.5875 |
| Psemb3  | 24.8924 | 25.0507 | 24.5991 | 25.1635 |
| Psemb4  | 23.7989 | 24.2338 | 24.2124 | 23.6217 |
| Psemb5  | 23.2192 | nd      | 23.2946 | 23.7574 |
| Psemb6  | 24.4444 | 24.7661 | 24.4234 | 24.1381 |
| Psemb7  | 23.7487 | 24.1658 | 24.1256 | 24.3071 |
| Psmc1   | 24.9617 | 24.8959 | 25.0999 | 24.9245 |
| Psmc2   | 25.2949 | 25.5163 | 25.37   | 25.4391 |
| Psmc3   | 26.1247 | 26.153  | 26.4215 | 26.3951 |
| Psmc4   | 26.3266 | 26.274  | 26.2487 | 26.1513 |
| Psmc5   | 24.9436 | 25.046  | 25.3147 | 25.5082 |
| Psmc6   | 25.8028 | 26.0498 | 25.6972 | 26.1546 |
| Psmd1   | 25.6021 | 26.193  | 25.5212 | 26.1933 |
| Psmd11  | 25.9644 | 26.4987 | 26.0447 | 26.3141 |
| Psmd12  | 24.9152 | 25.2513 | 24.8938 | 25.0592 |
| Psmd13  | 23.4823 | 24.3657 | 24.2072 | 24.5999 |
| Psmd14  | 25.5167 | 25.7227 | 25.3343 | 25.6982 |
| Psmd2   | 26.5371 | 26.9527 | 26.7275 | 26.9101 |
| Psmd3   | 24.0097 | 24.1926 | 23.7867 | 24.2056 |
| Psmd4   | 23.2884 | 23.615  | 24.6254 | 23.7636 |
| Psmd5   | 25.0926 | 25.1462 | 25.239  | 25.2556 |
| Psmd6   | 23.4804 | 23.3917 | 23.5564 | 23.7664 |
| Psmd7   | 25.5977 | 25.8463 | 25.6683 | 26.1292 |
| Psmd8   | 23.9097 | 24.088  | 23.6212 | 24.2207 |
| Psmd9   | 23.8704 | 23.6878 | 23.5379 | 23.8873 |
| Psmc1   | 27.3359 | 27.4876 | 27.2813 | 27.4299 |
| Psmc2   | 26.8386 | 26.9755 | 26.4691 | 26.957  |
| Psmg1   | nd      | 21.428  | 21.4267 | 21.5093 |
| Ptbp1   | 27.8813 | 28.1234 | 27.9317 | 28.3474 |

|        |         |         |         |         |
|--------|---------|---------|---------|---------|
| Ptbp2  | nd      | 22.161  | nd      | 22.1031 |
| Ptcd3  | nd      | 22.5869 | 22.6156 | 22.1826 |
| Pter   | 22.691  | 22.9948 | 22.2424 | 22.4745 |
| Ptges2 | 25.1379 | 24.168  | 23.1138 | 23.3003 |
| Ptges3 | 25.8625 | 26.0586 | 26.1159 | 26.3289 |
| Ptgfrn | 21.7018 | 21.7455 | 21.9152 | 21.65   |
| Ptgis  | 30.1029 | 30.3531 | 30.181  | 30.476  |
| Ptgr1  | 23.303  | 23.5537 | 23.2564 | 23.3342 |
| Ptgr2  | 23.9425 | 23.8557 | 23.5489 | 23.9169 |
| Ptgs1  | 25.5589 | 25.4564 | 25.444  | 25.913  |
| Ptms   | 24.3614 | 23.406  | 23.964  | 23.4043 |
| Ptp4a2 | 22.8744 | 23.1424 | 23.3439 | 23.3115 |
| Ptpn11 | 24.2133 | 24.112  | 23.5626 | 24.4643 |
| Ptpn12 | 20.4965 | 20.7629 | 20.4707 | 20.9469 |
| Ptpn23 | 21.6276 | 21.9014 | 21.3491 | 21.6847 |
| Ptprc  | nd      | nd      | nd      | nd      |
| Ptrf   | 30.861  | 30.7101 | 30.7911 | 30.7494 |
| Ptrh2  | 23.723  | 23.785  | 23.5829 | 22.2615 |
| Puf60  | 22.7992 | 23.2165 | 23.2093 | 23.3518 |
| Pura   | 25.2142 | 25.3084 | 25.5429 | 25.4857 |
| Pxdn   | 23.2403 | 22.9222 | 22.8423 | 23.0011 |
| Pxn    | 25.1994 | 25.6647 | 25.2684 | 25.8649 |
| Pygb   | 28.1459 | 28.3538 | 28.078  | 28.3903 |
| Pygl   | 24.6823 | 24.9153 | 24.3023 | 24.4994 |
| Pygm   | 28.2418 | 28.4351 | 28.3665 | 28.3086 |
| Qars1  | 25.9645 | 26.4393 | 26.3843 | 26.6713 |
| Qdpr   | 26.0718 | 26.15   | 25.9684 | 26.2361 |
| Qil1   | 24.647  | 24.8157 | 24.3272 | 24.4698 |
| Qki    | 21.7792 | 22.3667 | 21.7857 | 22.29   |
| Rab10  | 25.7772 | 25.627  | 25.9097 | 25.5891 |
| Rab11b | 25.874  | 25.8298 | 26.1947 | 25.9046 |
| Rab12  | 21.1295 | 21.9301 | 22.1284 | 21.9797 |
| Rab14  | 26.182  | 26.4851 | 26.472  | 26.3552 |
| Rab18  | 23.9074 | 23.9416 | 23.8164 | 23.8812 |
| Rab1A  | 26.651  | 26.6525 | 26.7671 | 26.8627 |
| Rab1b  | 24.2338 | 24.5236 | 24.7032 | 24.6432 |
| Rab21  | 25.2505 | 24.937  | 25.3291 | 25.3727 |
| Rab27b | 21.2208 | 21.2488 | 20.9109 | 21.1776 |
| Rab2a  | 24.7641 | 24.2868 | 24.8897 | 24.438  |
| Rab34  | 22.4699 | 22.7516 | 22.8285 | 23.1293 |
| Rab35  | 24.3719 | 24.4621 | 24.1183 | 24.3169 |

|         |         |         |         |         |
|---------|---------|---------|---------|---------|
| Rab5a   | 24.2262 | 23.427  | nd      | 24.2221 |
| Rab5b   | 26.4379 | 26.3418 | 26.3797 | 26.4996 |
| Rab5c   | 25.2119 | 25.1912 | 25.1465 | 25.1125 |
| Rab6b   | 24.4857 | 24.3965 | 24.5365 | 24.4113 |
| Rab7a   | 26.1218 | 26.2182 | 26.1401 | 26.2057 |
| Rab8a   | 23.4822 | 23.2497 | 23.447  | nd      |
| Rab8b   | 22.2783 | 22.3849 | 22.5134 | 22.929  |
| Rac1    | 28.3514 | 28.4696 | 28.5008 | 28.4941 |
| Rad23b  | 24.625  | 25.0919 | 24.9431 | 24.7352 |
| Rala    | 24.3434 | 25.1739 | 25.0384 | 25.2162 |
| Raly    | 22.8946 | 22.8239 | 22.863  | nd      |
| Ran     | 27.0302 | 26.8783 | 26.8385 | 26.9144 |
| Ranbp1  | 25.4912 | 25.676  | 25.7814 | 25.683  |
| Ranbp2  | 22.9048 | 23.3098 | 23.5937 | 23.7452 |
| Rangap1 | 20.7532 | 19.4131 | 20.9172 | nd      |
| Rap1a   | 25.4505 | 25.6362 | 25.4809 | 25.7163 |
| Rap1b   | 28.45   | 28.2178 | 28.4287 | 28.372  |
| Rap2c   | nd      | 20.9045 | 20.8574 | 21.3174 |
| Rarres2 | 23.8376 | 23.9273 | 24.3384 | 24.1143 |
| Rars    | 26.3686 | 26.6887 | 26.3444 | 26.4508 |
| Raver1  | nd      | 22.1219 | 21.6235 | 22.1354 |
| Rbbp4   | 24.5278 | 24.5675 | 24.7537 | 24.7447 |
| Rbbp7   | 23.1038 | 22.8777 | 22.8413 | 23.1394 |
| Rbbp9   | 27.3087 | 27.6422 | 27.2911 | 27.5489 |
| Rbm14   | nd      | 21.703  | 20.8434 | 20.9886 |
| Rbm19   | nd      | 23.9059 | 23.2821 | 23.9334 |
| Rbm25   | 23.4897 | 23.9262 | 23.5255 | 21.4866 |
| Rbm3    | 25.7264 | 26.1819 | 25.5532 | 26.2864 |
| Rbm39   | 23.5207 | 23.0541 | 23.0364 | 23.5893 |
| Rbmxl1  | 22.9083 | 23.2933 | 23.1044 | 23.6156 |
| Rbp1    | 28.0102 | 28.0775 | 27.989  | 28.1532 |
| Rbp4    | 23.2214 | 23.2922 | 23.6766 | 23.021  |
| Rbpms   | 26.1819 | 26.4501 | 26.5684 | 26.7789 |
| Rbpms2  | nd      | 22.9137 | 22.6383 | 23.0416 |
| Rcc1    | nd      | 22.0326 | nd      | 21.8563 |
| Rcn2    | 22.5918 | 22.8049 | 22.3817 | 22.5479 |
| Rcn3    | 25.2846 | 26.0794 | 25.8574 | 25.773  |
| Rdh11   | nd      | 23.1139 | 22.8447 | nd      |
| Rdh14   | 21.642  | 21.7194 | 22.0853 | 22.2744 |
| Rdx     | 23.4319 | 23.5393 | 23.0246 | 23.3953 |
| Reep5   | 24.4459 | 24.6421 | 24.9758 | 23.9589 |

|        |         |         |         |         |
|--------|---------|---------|---------|---------|
| Rexo2  | 22.6159 | 21.5345 | 22.5173 | 22.369  |
| Rgs18  | 23.9725 | 24.4938 | 24.2255 | 23.8645 |
| Rhoa   | 28.3608 | 28.3962 | 28.744  | 28.5101 |
| Rhob   | 23.0904 | 22.8773 | 22.7195 | 23.6323 |
| Rhoc   | 24.7165 | 24.5443 | 24.6606 | 24.397  |
| Rhoq   | 20.0386 | 20.4538 | 19.7503 | nd      |
| Rhot1  | 23.5839 | 23.8615 | 23.1255 | 23.269  |
| Rilpl1 | 22.546  | 23.4017 | 22.7272 | 23.137  |
| Rmdn1  | 23.1788 | 23.593  | 21.86   | nd      |
| Rmdn3  | 23.377  | 23.776  | 22.7654 | 22.9963 |
| Rnase4 | 23.269  | 23.649  | 23.1383 | 23.4092 |
| Rnh1   | 27.4751 | 27.7019 | 27.6839 | 27.8618 |
| Rnpep  | 25.0775 | 25.5558 | 25.0492 | 25.3906 |
| Rock1  | 26.4869 | 26.5112 | 26.4651 | 26.7497 |
| Rock2  | 23.9319 | 24.0511 | 23.9809 | 24.2277 |
| Rpa2   | 20.876  | 20.6152 | 20.8843 | nd      |
| Rpe    | 22.6187 | 22.5741 | 22.6014 | 22.5555 |
| Rpl10  | 26.4961 | 26.5865 | 26.7852 | 26.7425 |
| Rpl10a | 26.6964 | 26.4765 | 26.6768 | 26.7234 |
| Rpl11  | 24.3616 | 24.3571 | 23.9996 | 25.0507 |
| Rpl12  | 26.5302 | 26.1249 | 26.5696 | 26.3257 |
| Rpl13  | 26.7528 | 27.1485 | 27.2285 | 27.3269 |
| Rpl13a | 24.6517 | 24.9951 | 25.0114 | 25.3533 |
| Rpl14  | 26.1077 | 26.2896 | 26.323  | 26.4088 |
| Rpl15  | 26.4674 | 26.5452 | 26.2564 | 26.7104 |
| Rpl17  | 26.9166 | 26.9871 | 26.941  | 27.103  |
| Rpl18  | 24.5721 | 25.3756 | 25.425  | 25.3873 |
| Rpl18a | 24.0357 | 24.3324 | 24.3756 | 24.4381 |
| Rpl19  | 24.1756 | 23.6877 | 23.44   | 23.4501 |
| Rpl21  | 24.7016 | 24.9175 | 25.2574 | 25.4527 |
| Rpl22  | 24.9449 | 24.5571 | 25.0141 | 25.0537 |
| Rpl23  | 26.1473 | 26.3278 | 26.2355 | 26.2245 |
| Rpl23a | 24.8037 | 24.8969 | 25.3568 | 24.5551 |
| Rpl24  | 26.7012 | 26.5904 | 26.4315 | 26.7222 |
| Rpl26  | 24.9751 | 24.9712 | 25.2257 | 25.3055 |
| Rpl27  | 24.7444 | 24.7043 | 24.8753 | 24.7139 |
| Rpl27a | 26.2255 | 26.4506 | 26.2735 | 26.3375 |
| Rpl28  | 24.9829 | 25.0137 | 24.7532 | 24.8616 |
| Rpl29  | 23.7607 | 23.5309 | 23.6861 | 23.9478 |
| Rpl3   | 26.7252 | 26.7409 | 26.8573 | 26.5825 |
| Rpl30  | 24.4118 | 24.227  | 23.8107 | 24.3231 |

|        |         |         |         |         |
|--------|---------|---------|---------|---------|
| Rpl31  | 26.1053 | 26.6047 | 26.1122 | 26.7264 |
| Rpl32  | 25.4487 | 25.6727 | 25.4167 | 25.4965 |
| Rpl34  | 24.4603 | 24.4977 | 24.8021 | 24.5629 |
| Rpl35  | 23.9147 | 23.9632 | 23.8231 | 24.377  |
| Rpl35a | 23.8798 | 22.5759 | 24.1828 | 24.5071 |
| Rpl36  | 24.6874 | 24.2067 | 24.4393 | 24.3786 |
| Rpl37a | 23.7793 | 23.9021 | 23.7546 | 23.4377 |
| Rpl38  | 23.8203 | 23.8404 | 23.493  | 23.8134 |
| Rpl39  | 24.6577 | 25.2763 | 24.5429 | 24.8868 |
| Rpl4   | 28.4667 | 28.4749 | 28.525  | 28.6148 |
| Rpl5   | 26.5096 | 26.611  | 26.3074 | 26.7167 |
| Rpl6   | 26.4034 | 26.6125 | 26.6331 | 26.6251 |
| Rpl7   | 26.7235 | 26.8042 | 26.6859 | 27.0114 |
| Rpl7a  | 26.8019 | 26.8881 | 27.0451 | 26.9547 |
| Rpl8   | 26.4865 | 26.3176 | 26.3778 | 26.4583 |
| Rpl9   | 24.9334 | 24.7692 | 24.5832 | 24.9486 |
| Rplp0  | 27.2527 | 27.2917 | 27.3533 | 27.4849 |
| Rplp1  | 27.9474 | 28.1234 | 27.7712 | 28.1025 |
| Rplp2  | 27.2463 | 27.168  | 27.3663 | 27.502  |
| Rpn1   | 27.6078 | 27.7097 | 27.6514 | 27.69   |
| Rpn2   | 27.6121 | 27.732  | 27.8065 | 28.032  |
| Rps10  | 25.6336 | 25.5251 | 25.3221 | 25.7911 |
| Rps11  | 25.3064 | 25.0716 | 25.1309 | 24.8288 |
| Rps12  | 25.6157 | 25.8068 | 25.9265 | 25.6658 |
| Rps13  | 27.3202 | 27.5587 | 27.5556 | 27.6675 |
| Rps14  | 24.7399 | 24.7163 | 24.9311 | 24.1598 |
| Rps15  | 25.6994 | 26.2049 | 25.5579 | 26.3272 |
| Rps15a | 26.1401 | 26.146  | 26.2955 | 26.2929 |
| Rps16  | 22.6112 | 22.9452 | 23.492  | 23.9123 |
| Rps17  | 26.2368 | 26.2867 | 26.0585 | 26.674  |
| Rps18  | 26.8854 | 26.8889 | 26.7441 | 26.9652 |
| Rps19  | 26.4876 | 26.7954 | 26.632  | 27.2882 |
| Rps2   | 26.3863 | 26.0731 | 26.3014 | 26.0203 |
| Rps20  | 24.8457 | 24.8554 | 25.2974 | 25.3294 |
| Rps21  | 23.392  | 23.2293 | nd      | 23.3802 |
| Rps23  | 24.5858 | 24.2969 | 24.7198 | 24.5005 |
| Rps24  | 25.0366 | 25.0322 | 24.9599 | 24.904  |
| Rps25  | 24.9336 | 25.4093 | 25.6075 | 25.0635 |
| Rps26  | 25.0009 | 24.8104 | 24.9239 | 24.3652 |
| Rps27a | 28.2281 | 27.6288 | 28.1011 | 27.5508 |
| Rps27l | 27.1446 | 26.1534 | 27.6087 | 26.796  |

|         |         |         |         |         |
|---------|---------|---------|---------|---------|
| Rps28   | 23.9274 | 23.1369 | 21.8168 | 22.919  |
| Rps29   | 24.1455 | 24.2641 | 23.4189 | 23.8799 |
| Rps3    | 26.2922 | 26.2544 | 26.3476 | 26.2907 |
| Rps3a   | 27.2636 | 27.4743 | 27.5896 | 27.6682 |
| Rps4x   | 27.2328 | 27.3635 | 27.2033 | 27.657  |
| Rps5    | 26.1067 | 26.305  | 26.2702 | 26.556  |
| Rps6    | 24.9908 | 26.1215 | nd      | nd      |
| Rps6ka3 | 21.9782 | 22.0277 | 22.3715 | 22.4352 |
| Rps7    | 26.1289 | 26.247  | 26.0851 | 26.2479 |
| Rps8    | 27.1674 | 26.9826 | 26.9133 | 27.0453 |
| Rps9    | 26.7792 | 26.9158 | 27.1356 | 26.8954 |
| Rpsa    | 28.158  | 28.1835 | 28.0947 | 28.3308 |
| Rptor   | 20.3169 | 20.5863 | 20.252  | nd      |
| Rrad    | nd      | nd      | 23.2326 | 23.7104 |
| Rras    | 27.6565 | 27.6557 | 27.628  | 27.6375 |
| Rrbp1   | 27.0453 | 27.1417 | 27.3514 | 27.4324 |
| Rsu1    | 29.8023 | 29.983  | 29.8285 | 30.1386 |
| RtcA    | 22.4815 | 22.4527 | 20.622  | 22.9155 |
| Rtcb    | 25.1312 | 25.4886 | 25.5564 | 25.3199 |
| Rtn1    | 23.5791 | 22.8858 | 23.5246 | 22.5616 |
| Rtn2    | nd      | 22.3696 | 22.9282 | 22.6515 |
| Rtn3    | 25.7281 | 25.5825 | 25.8833 | 25.4272 |
| Rtn4    | nd      | 22.975  | 23.8325 | 23.4633 |
| Rtn4    | 26.902  | 26.9171 | 26.6382 | 26.9349 |
| RTRAF   | 24.9116 | 25.1042 | 24.9907 | 25.1396 |
| Rufy1   | nd      | 22.7031 | 22.7034 | 23.1102 |
| Ruvbl1  | 24.2474 | 24.3251 | 24.4527 | 24.7048 |
| Ryr1    | 24.7988 | 23.7485 | nd      | 24.4056 |
| S100a1  | 22.2112 | 21.9175 | 21.8785 | 21.6006 |
| S100a10 | 28.9765 | 28.7265 | 29.2101 | 28.9191 |
| S100a11 | 29.4185 | 29.2855 | 29.1431 | 29.5217 |
| S100a13 | 23.6967 | 22.5603 | 22.3458 | 23.743  |
| S100a3  | 19.8741 | nd      | nd      | nd      |
| S100a4  | 31.9806 | 31.8979 | 31.9677 | 32.4656 |
| S100a5  | 24.4533 | nd      | 24.0646 | 25.3676 |
| S100a6  | 26.4587 | 26.6929 | 26.8671 | 26.7928 |
| Saal1   | 21.8839 | nd      | 21.8972 | 21.9776 |
| Sacm1l  | 23.7681 | 23.8897 | 24.043  | 24.2207 |
| Sae1    | 24.7225 | 25.1106 | 24.5361 | 25.2971 |
| Safb2   | 23.8374 | nd      | 24.6033 | nd      |
| Samhd1  | 25.9852 | 26.2415 | 26.1132 | 26.3764 |



|           |         |         |         |         |
|-----------|---------|---------|---------|---------|
| Septin9   | 26.9796 | 27.0928 | 27.1765 | 27.4274 |
| Serbp1    | 23.4425 | 23.4541 | 23.8089 | 23.6351 |
| Serpina1a | 25.1908 | 25.1099 | 25.2776 | 24.7342 |
| Serpina1b | 27.7398 | 27.3311 | 27.276  | 27.3045 |
| Serpina1c | 30.8556 | 30.2611 | 30.7944 | 30.0308 |
| Serpina1d | 27.6407 | 27.3981 | 27.7485 | 26.9699 |
| Serpina1e | 27.5553 | 26.9671 | 27.7741 | 26.9739 |
| Serpina3k | 28.8945 | 28.2064 | 29.0747 | 27.752  |
| Serpina3m | 28.0652 | 28.7136 | 28.6479 | 28.219  |
| Serpina3n | 23.4299 | 23.5385 | 23.6595 | 23.3233 |
| Serpina6  | 21.8236 | 21.4765 | 21.5682 | 21.2246 |
| Serpinb1a | 22.7818 | 22.5437 | 22.8475 | nd      |
| Serpinb6  | 28.1468 | 28.2859 | 27.9682 | 28.3616 |
| Serpinc1  | 29.4508 | 29.2065 | 29.4519 | 29.6688 |
| Serpind1  | 25.2738 | 25.0049 | 25.1267 | 25.4056 |
| Serpine2  | 27.7726 | 27.6988 | 27.8055 | 27.901  |
| Serpinf1  | 26.8737 | 27.007  | 26.7296 | 27.2031 |
| Serpinf2  | 22.8627 | nd      | 22.2088 | 22.8973 |
| Serping1  | 24.9771 | 24.4522 | 24.7766 | 24.8933 |
| Serpinh1  | 30.5425 | 30.4619 | 30.557  | 30.78   |
| Set       | 23.7959 | 24.4977 | 24.2857 | 23.7122 |
| Setd7     | nd      | 21.8363 | 21.7641 | 21.8658 |
| Sf1       | 23.9295 | 24.7093 | 24.2758 | 24.9983 |
| Sf3a1     | 22.2547 | nd      | nd      | 23.0961 |
| Sf3a2     | 22.5537 | 22.5606 | 22.1295 | 22.6168 |
| Sf3b1     | 23.2506 | 24.1994 | 24.4739 | 24.0988 |
| Sf3b3     | 23.1304 | 23.1491 | 23.4672 | 23.9925 |
| Sf3b4     | 22.8931 | 23.0653 | 23.2431 | 22.985  |
| Sfn       | 25.4427 | 24.9971 | 25.7905 | 24.6318 |
| Sfpq      | 26.0137 | 25.9424 | 26.1904 | 26.1265 |
| Sfrp1     | 24.8495 | 25.3078 | 24.6578 | 25.2592 |
| Sfxn1     | 24.0636 | 24.667  | 24.4739 | 24.6403 |
| Sfxn3     | 28.2004 | 28.3552 | 28.4562 | 28.6154 |
| Sgca      | 24.7249 | 24.7537 | 25.1187 | 25.0166 |
| Sgcb      | 25.0758 | 25.3558 | 25.0058 | 25.2379 |
| Sgcd      | 26.0257 | 25.8782 | 26.4747 | 26.3538 |
| Sgce      | 26.8817 | 26.8094 | 26.7353 | 27.1302 |
| Sgcg      | 23.5892 | 23.5122 | nd      | 23.4527 |
| Sgpl1     | nd      | 21.5832 | 21.5122 | 21.4775 |
| Sgta      | nd      | 27.1396 | 26.4504 | 26.7645 |
| Sh3bgrl   | 28.0133 | 27.818  | 27.8324 | 27.5802 |



|          |         |         |         |         |
|----------|---------|---------|---------|---------|
| Sh3bgrl3 | 24.7351 | 24.7397 | 24.7395 | 24.672  |
| Sh3d21   | 29.3225 | 29.1367 | 29.4309 | 28.9622 |
| Sh3gl1   | 22.8991 | 22.9357 | 22.8438 | 22.8279 |
| Sh3glb1  | 23.8496 | 23.7477 | 24.1238 | 24.2524 |
| Sh3glb2  | 24.7511 | 24.3251 | 24.3759 | 24.3389 |
| Sh3pxd2a | nd      | 23.3869 | 23.5014 | nd      |
| Shmt2    | 23.481  | 23.6938 | 23.6659 | 24.1563 |
| Sim2     | 23.7775 | 23.6938 | 23.9185 | 24.0733 |
| Sirt2    | nd      | 21.969  | nd      | nd      |
| Skiv2l2  | 22.9506 | 23.2996 | 22.9198 | 23.3983 |
| Skp1     | 24.6667 | 25.0489 | 24.5131 | 24.7096 |
| Slc12a6  | 21.578  | 22.4159 | 22.012  | 22.214  |
| Slc1a5   | 22.8277 | 22.4958 | 22.8472 | nd      |
| Slc25a1  | 25.8441 | 26.1657 | 26.0882 | 25.9051 |
| Slc25a10 | 23.5129 | 23.5698 | 23.3362 | 23.6192 |
| Slc25a11 | 25.8975 | 25.8014 | 25.6443 | 25.7995 |
| Slc25a12 | 26.3921 | 26.7275 | 26.6355 | 27.1407 |
| Slc25a20 | 25.2065 | 25.6645 | 23.8204 | nd      |
| Slc25a24 | 24.5867 | 24.9474 | 24.7079 | 25.0081 |
| Slc25a3  | 27.3436 | 27.4123 | 27.3572 | 27.3593 |
| Slc25a4  | 30.3067 | 30.5047 | 30.3258 | 30.3522 |
| Slc25a42 | 23.1063 | 23.5043 | 21.8514 | 22.0915 |
| Slc25a5  | 28.0562 | 27.9309 | 27.6768 | 27.4875 |
| Slc25a51 | 22.8812 | 23.2943 | nd      | 22.6165 |
| Slc27a1  | 21.5645 | 22.0055 | 22.0272 | 22.0474 |
| Slc29a1  | 20.538  | 21.105  | 21.3326 | 21.1914 |
| Slc2a1   | 22.1401 | nd      | 23.0039 | 21.692  |
| Slc3a2   | 23.1846 | 22.6635 | 22.2823 | nd      |
| Slc44a2  | 24.5102 | 24.3095 | 24.7061 | 25.1033 |
| Slc4a1   | 29.2442 | 28.2882 | 28.7792 | 28.8015 |
| Slc4a7   | 23.8474 | 22.4346 | 23.1781 | 22.8827 |
| Slit3    | 23.7443 | 24.0089 | 23.1931 | 24.084  |
| SImap    | 27.9477 | 28.0103 | 28.094  | 28.2051 |
| Smarca2  | 23.6005 | nd      | 23.3834 | 23.3129 |
| Smarca5  | 23.3009 | 23.9471 | 23.7187 | 23.6924 |
| Smarcc2  | 23.1691 | 23.6382 | 23.3259 | 23.3502 |
| Smc1a    | 22.5828 | 22.9042 | 22.8863 | 23.1101 |
| Smc3     | 20.3706 | 21.4408 | nd      | 21.5615 |
| Smdt1    | 20.8529 | 21.5504 | 21.1205 | 21.3505 |
| Smoc1    | 26.1094 | 26.3011 | 26.18   | 26.4019 |
| Smpd4    | 22.6783 | 22.0714 | 21.8672 | 22.9002 |

|          |         |         |         |         |
|----------|---------|---------|---------|---------|
| Smpdl3a  | 21.5862 | 21.6727 | nd      | 21.8243 |
| Smpdl3b  | 21.9379 | 21.7389 | 21.556  | 22.0611 |
| Smtn     | 29.6759 | 29.5233 | 29.9545 | 29.7781 |
| Smu1     | 23.106  | 23.8369 | 22.8865 | 23.7728 |
| Sncg     | 25.0988 | 25.2517 | 25.7421 | 24.7147 |
| Snd1     | 26.6085 | 26.426  | 26.3898 | 26.8933 |
| Snrnp200 | 24.6941 | 25.0846 | 24.4836 | 25.0832 |
| Snrnp70  | 24.1407 | 24.3276 | 23.9989 | 24.5294 |
| Snrpa    | 23.4135 | 24.1189 | 23.6032 | 23.8373 |
| Snrpb    | 24.4526 | 24.529  | 24.4786 | 24.7724 |
| Snrpb2   | 23.356  | 24.1033 | 23.8963 | 23.916  |
| Snrpd1   | 25.4582 | 25.8191 | 25.281  | 25.817  |
| Snrpd3   | 23.8494 | 23.8643 | 23.6989 | 23.6882 |
| Snrpe    | 24.5188 | 25.0521 | 24.8265 | 25.473  |
| Snrpf    | 23.4827 | 23.3431 | 23.5206 | 24.0849 |
| Snrpg    | 21.5873 | 23.449  | 23.3938 | nd      |
| Snta1    | 25.0809 | 25.2296 | 25.2807 | 24.8755 |
| Sntb1    | 26.6564 | 26.6836 | 26.5906 | 26.6422 |
| Sntb2    | 26.5479 | 26.6919 | 26.6824 | 26.7119 |
| Snx1     | 24.8054 | 24.2362 | 24.5862 | 24.4792 |
| Snx12    | 23.3938 | 23.1588 | 23.6    | 23.2598 |
| Snx17    | 22.6771 | 22.7994 | 22.7951 | nd      |
| Snx18    | 26.1006 | 26.2416 | 25.8585 | 26.3929 |
| Snx2     | 23.0406 | 23.325  | 23.9402 | 23.5197 |
| Snx3     | 24.2081 | 24.4413 | 24.2219 | 24.6676 |
| Snx4     | 21.1453 | 21.0569 | nd      | 22.185  |
| Snx5     | 23.1664 | 23.1586 | 22.9814 | 22.863  |
| Snx6     | 22.0722 | 22.5655 | 23.2334 | 22.9263 |
| Snx9     | 24.5089 | 24.5201 | 24.4746 | 24.5945 |
| Sod1     | 29.0833 | 28.6698 | 29.2439 | 28.5613 |
| Sod2     | 27.4924 | 27.464  | 27.0196 | 26.9193 |
| Sod3     | 30.351  | 30.1005 | 30.2804 | 30.294  |
| Sorbs1   | 27.0993 | 27.4536 | 27.6677 | 27.535  |
| Sorbs2   | 27.2465 | 27.2626 | 27.7591 | 27.7236 |
| Sorbs3   | 25.4479 | 25.7911 | 25.8128 | 26.1508 |
| Sord     | 23.833  | 23.9355 | 24.0326 | 23.478  |
| Sost     | 27.1966 | 27.0984 | 26.8278 | 27.2174 |
| Spag9    | nd      | 22.3347 | 21.2385 | 22.4751 |
| Sparc    | 25.929  | 25.6173 | 25.6057 | 25.5079 |
| Sparcl1  | nd      | 22.8984 | 23.4509 | 22.7136 |
| Spcs2    | 23.782  | 23.1176 | 23.6608 | 23.1606 |

|         |         |         |         |         |
|---------|---------|---------|---------|---------|
| Spon1   | 24.749  | 24.1754 | 24.7672 | 24.8794 |
| Spr     | 26.8485 | 27.1997 | 27.0127 | 27.1091 |
| Spta1   | 27.6318 | 26.6651 | 27.0047 | 27.2663 |
| Sptan1  | 29.9983 | 29.8655 | 30.2321 | 30.0812 |
| Sptb    | 27.4106 | 26.293  | 26.6449 | 26.8616 |
| Sptbn1  | 30.0223 | 29.928  | 30.2359 | 30.0997 |
| Sqrdl   | 25.2178 | 25.1798 | 25.3053 | 25.3553 |
| Sri     | 26.3098 | 26.3263 | 26.5746 | 26.3772 |
| Srm     | 24.3642 | 24.0364 | 24.9564 | 24.0996 |
| Srp14   | 22.0477 | 22.0189 | 22.0275 | 22.3122 |
| Srp54   | 22.6106 | 22.9691 | 22.5623 | 22.7457 |
| Srpr    | 20.5538 | 21.5028 | 21.12   | nd      |
| Srpx    | 24.9432 | 24.9602 | 24.6047 | 25.0182 |
| Srrm1   | 22.7807 | 23.4339 | 23.1347 | 23.4879 |
| Srrt    | nd      | 24.0217 | 23.681  | 24.4113 |
| Srsf1   | 23.2931 | 23.6917 | 23.6261 | 23.561  |
| Srsf10  | 23.5133 | 23.555  | 23.3515 | 23.5093 |
| Srsf2   | 24.3159 | 24.3    | 24.1055 | 23.918  |
| Srsf3   | 25.2844 | 25.4262 | 25.6182 | 25.5306 |
| Srsf6   | 24.1239 | 23.9563 | 24.8418 | 24.0284 |
| Srsf7   | 23.4262 | 23.5195 | 23.7449 | 23.8005 |
| Ssb     | 25.6245 | 25.6137 | 25.4823 | 25.8941 |
| Ssbp1   | nd      | 23.8902 | nd      | 23.7964 |
| Sspn    | nd      | 22.0975 | nd      | 21.6876 |
| Ssr1    | 24.3809 | 24.6215 | 24.5198 | 24.4887 |
| Ssr4    | 23.1122 | 23.0002 | 23.1721 | 22.8326 |
| St13    | 25.7873 | 26.2227 | 25.9182 | 26.1294 |
| St3gal5 | 22.4996 | 22.7987 | 22.6268 | 22.7107 |
| Stat3   | 24.7081 | 25.0988 | 24.7875 | 25.1406 |
| Steap3  | 24.0689 | 24.5122 | 23.4563 | 24.3467 |
| Stim1   | 23.3309 | 23.3927 | 23.161  | 23.5603 |
| Stip1   | 27.1287 | 27.1019 | 27.4355 | 27.2546 |
| Stk24   | 25.4118 | 25.5545 | 25.4179 | 25.8642 |
| Stk39   | nd      | 22.5545 | nd      | 22.4782 |
| Stom    | 26.5327 | 26.5109 | 26.4244 | 26.295  |
| Stoml2  | 24.385  | 24.4083 | 24.0384 | 24.5825 |
| Ston1   | 20.0441 | 19.5959 | nd      | 19.6    |
| Strap   | nd      | 22.9537 | nd      | nd      |
| Sts     | 23.0241 | 23.5767 | 23.6334 | 23.9206 |
| Stt3a   | 22.2624 | 22.2791 | 22.8965 | nd      |
| Stt3b   | 22.3702 | 22.8598 | 22.7838 | 22.6075 |

|         |         |         |         |         |
|---------|---------|---------|---------|---------|
| Stx12   | 24.6609 | 24.3432 | 24.1552 | 24.367  |
| Stx16   | 22.9694 | 22.7891 | 22.3274 | 23.1775 |
| Stx7    | 22.9434 | 23.0119 | 22.6608 | 22.9928 |
| Stxbp1  | 24.8525 | 24.9417 | 25.1018 | 25.1441 |
| Stxbp3  | 25.3762 | 25.7191 | 25.4437 | 25.6899 |
| Sucla2  | 26.8943 | 27.1501 | 26.3894 | 26.2066 |
| Suclg1  | 27.7694 | 28.2227 | 27.0747 | 27.2525 |
| Suclg2  | 25.603  | 25.4389 | 25.254  | 25.4612 |
| Sugt1   | 23.1345 | 23.1769 | nd      | 22.7812 |
| Sulf1   | 22.7244 | 22.66   | nd      | 22.7395 |
| Sun1    | 24.1697 | 24.1148 | 23.7732 | 23.8236 |
| Sun2    | 26.517  | 26.6706 | 26.7717 | 27.131  |
| Suox    | nd      | 22.4577 | 22.4078 | 22.5127 |
| Surf4   | 23.8157 | 23.4737 | 23.3317 | 23.8647 |
| Susd2   | 26.0524 | 26.0789 | 26.1991 | 26.4296 |
| Svil    | 24.5111 | 24.9718 | 25.078  | 24.8418 |
| Sync    | nd      | 21.8258 | 22.2761 | 21.8753 |
| Syncrip | 25.7402 | 25.852  | 25.8257 | 25.7074 |
| Syne1   | 24.806  | 24.8174 | 24.6836 | 25.1745 |
| Syne2   | 23.197  | 23.6662 | 23.2919 | 23.3974 |
| Sym     | 23.0432 | 22.8508 | 23.1437 | 23.0696 |
| Synpo   | 25.5954 | 25.7659 | 25.9464 | 25.795  |
| Synpo2  | 28.7556 | 29.056  | 29.103  | 29.1694 |
| Tagln   | 33.3708 | 33.4278 | 33.4996 | 33.4862 |
| Tagln2  | 33.1786 | 33.2018 | 33.3195 | 33.1942 |
| Tagln3  | 26.2797 | 25.7213 | 26.1969 | 25.7116 |
| Taldo1  | 26.5126 | 26.828  | 26.472  | 26.6185 |
| Tapbp   | 24.4873 | 24.9643 | 24.256  | 24.6745 |
| Tardbp  | 26.2591 | 26.0697 | 26.0968 | 26.1513 |
| Tars    | 24.4198 | 24.5509 | 24.3251 | 24.8764 |
| Tbc1d1  | nd      | 20.8009 | nd      | 21.4837 |
| Tbcd    | 21.4491 | 22.0561 | 21.5077 | 22.0326 |
| Tcea1   | 22.3118 | 22.9649 | 22.8792 | 22.9676 |
| Tceb1   | 23.6745 | 23.8907 | 24.1608 | 23.2826 |
| Tceb2   | 24.7939 | 25.3034 | 24.9208 | 25.2584 |
| Tcn2    | nd      | 21.2622 | 20.7616 | 21.4736 |
| Tcp1    | 27.1153 | 27.2256 | 27.1229 | 27.3699 |
| Tes     | 27.0758 | 27.3048 | 27.1963 | 27.547  |
| Tf      | 30.8896 | 30.4267 | 30.8866 | 30.3446 |
| Tgfb1i1 | 30.4877 | 30.7755 | 30.6541 | 30.876  |
| Tgfb1   | 28.8669 | 29.1108 | 29.1709 | 29.4172 |

|          |         |         |         |         |
|----------|---------|---------|---------|---------|
| Tgm2     | 30.0837 | 30.0804 | 30.174  | 29.996  |
| Th       | 22.2039 | 22.1553 | nd      | 23.8977 |
| Thbs1    | 26.869  | 26.0077 | 26.2367 | 25.931  |
| Thsd4    | 26.7622 | 26.6161 | 26.9116 | 26.7666 |
| Thumpd1  | 21.8653 | 22.7132 | 21.3383 | 23.0026 |
| Thy1     | 25.3814 | 25.5625 | 25.9103 | 26.5489 |
| Timm13   | 24.2316 | 25.7437 | 25.0627 | 24.0518 |
| Timm44   | nd      | 22.5195 | 22.022  | 22.215  |
| Timm50   | 21.1308 | 21.6626 | 21.3122 | 21.7226 |
| Timp3    | 23.248  | 23.1552 | 23.3516 | 23.8673 |
| Tinagl1  | 29.7973 | 29.8604 | 29.9021 | 30.0373 |
| Tjp1     | 23.6721 | 23.4253 | 24.3464 | 23.3275 |
| Tkt      | 29.9347 | 30.145  | 29.9959 | 29.6569 |
| Tln1     | 33.0964 | 33.1919 | 33.2271 | 33.2938 |
| Tln2     | 24.2505 | 24.5238 | 24.7566 | 25.0993 |
| Tmco1    | nd      | 22.4977 | 21.9529 | 22.8012 |
| Tmed10   | 25.6264 | 25.8598 | 25.8491 | 25.7818 |
| Tmed2    | 24.7219 | 24.7608 | 24.6764 | 25.1227 |
| Tmed9    | 23.4591 | 23.4686 | 23.0268 | nd      |
| Tmem14c  | 24.5384 | 24.2794 | 24.6553 | 24.4958 |
| Tmem167a | 20.9189 | 21.3888 | 20.9777 | 21.7735 |
| Tmem256  | 22.7348 | nd      | 21.9752 | 22.9788 |
| Tmem43   | 27.6792 | 27.8317 | 27.5752 | 27.9681 |
| Tmod1    | 22.3998 | nd      | 22.2235 | nd      |
| Tmod3    | 25.1732 | 25.4999 | 25.3214 | 25.482  |
| Tmpo     | 27.375  | 27.4247 | 27.4371 | 27.5617 |
| Tmpo     | 23.4077 | 23.4157 | 23.2412 | 23.4754 |
| Tmsb10   | 22.7549 | 22.4684 | 23.1574 | 22.337  |
| Tmsb4x   | 27.5322 | 26.7379 | 27.5536 | 26.6946 |
| Tmtc3    | 22.4138 | 22.3291 | 22.6998 | 22.8048 |
| Tmx1     | 24.0861 | 23.9577 | 23.0121 | 24.2349 |
| Tmx2     | 20.8545 | 20.7268 | 20.7999 | 20.8595 |
| Tmx4     | 22.072  | 22.1151 | 22.2406 | 22.8318 |
| Tnc      | nd      | 23.0022 | 23.1742 | 23.9912 |
| Tnfaip8  | nd      | 21.9786 | 21.6082 | 22.3007 |
| Tnpo1    | 24.9319 | 25.1575 | 24.9973 | 25.265  |
| Tnpo2    | 22.543  | 22.8977 | 22.7843 | 23.3395 |
| Tnpo3    | 23.3335 | 24.582  | 23.7753 | 24.1917 |
| Tns2     | 26.9215 | 27.0991 | 27.1976 | 27.5311 |
| Tom1     | 22.962  | 22.4447 | 22.5133 | 22.8634 |
| Tom1l2   | 24.0848 | 24.3444 | 23.9036 | 24.4242 |

|          |         |         |         |         |
|----------|---------|---------|---------|---------|
| Tomm22   | 23.1779 | 23.0382 | 23.684  | 22.8141 |
| Tomm34   | 23.19   | nd      | 22.8457 | 23.5736 |
| Tomm5    | nd      | 21.0606 | nd      | 21.2652 |
| Tomm70a  | 23.3115 | 24.244  | 23.979  | 24.532  |
| Top2a    | 27.1566 | 26.3433 | 26.3005 | 26.1423 |
| Top2b    | 23.5776 | 24.3149 | 24.2208 | 24.5589 |
| Tor1aip1 | 23.0957 | 23.1897 | 24.0808 | 22.0338 |
| Tor1aip2 | nd      | nd      | 22.0479 | nd      |
| Tor1b    | 23.1982 | 23.3839 | 22.7651 | 23.3915 |
| Tor3a    | 21.8653 | 22.0827 | nd      | 20.9388 |
| Tpd52    | nd      | nd      | nd      | 22.1987 |
| Tpd52l2  | 25.4374 | 25.287  | 25.0237 | 25.3376 |
| Tpi1     | 29.4896 | 29.5134 | 29.6093 | 29.4414 |
| Tpm1     | 29.8105 | 29.678  | 30.2368 | 29.964  |
| Tpm3     | 28.9858 | 28.5414 | 28.9097 | 28.5231 |
| Tpm4     | 26.7528 | 26.4403 | 26.6792 | 26.7959 |
| Tpp1     | 24.9457 | 25.0286 | 24.9784 | 25.2562 |
| Tppp     | 21.1659 | 21.2447 | 20.8843 | 21.2025 |
| Tppp3    | 28.1399 | 27.9504 | 28.3896 | 27.8504 |
| Tpr      | 22.64   | 22.7821 | 22.3315 | 23.746  |
| Tprg1l   | 21.9702 | 22.6744 | 22.261  | 22.4135 |
| Tprkb    | 20.4673 | 21.4998 | nd      | nd      |
| Tpt1     | 26.811  | 26.479  | 27.1383 | 26.5471 |
| Trap1    | 22.7875 | 23.1236 | 22.2148 | nd      |
| Trappc2  | 20.7596 | 20.7131 | 20.899  | nd      |
| Trappc3  | 22.8106 | 23.1152 | 23.2504 | 23.3384 |
| Trappc6b | 23.3316 | 23.5865 | 23.3696 | 23.6967 |
| Trim23   | 20.8574 | nd      | nd      | 21.7836 |
| Trim28   | 25.2257 | 25.4598 | 25.2664 | 25.4996 |
| Trim47   | 24.5942 | 24.7583 | 24.4205 | 24.5738 |
| Trio     | 22.4935 | 22.4715 | 22.4598 | 22.7317 |
| Trip10   | 27.3607 | 27.3277 | 27.3908 | 27.7389 |
| Trip6    | 25.7218 | 25.6756 | 25.6574 | 25.6039 |
| Trmt112  | 22.1773 | 23.1332 | 21.4958 | 23.1838 |
| Trnt1    | 22.4188 | 22.5152 | 22.502  | nd      |
| Tsn      | 24.193  | 23.5594 | 24.3149 | 24.297  |
| Tsnax    | 24.3617 | 24.3138 | 23.8013 | 24.4846 |
| Tspan4   | 23.8376 | 23.8845 | 23.4933 | 24.1258 |
| Tspan9   | 22.7964 | 23.3041 | 23.0789 | 22.5727 |
| Tspo     | 25.3559 | 26.2865 | 25.2156 | 26.0424 |
| Tst      | 24.4573 | 24.2603 | 24.4566 | 24.1703 |

|         |         |         |         |         |
|---------|---------|---------|---------|---------|
| Ttc28   | 21.3396 | 21.5086 | 21.0697 | 22.4705 |
| Ttc38   | 23.7163 | 24.2641 | 23.856  | 24.2436 |
| Ttll12  | 22.4244 | 22.6676 | nd      | 21.5031 |
| Ttn     | 27.5975 | 22.1201 | 21.8924 | 22.1961 |
| Ttr     | 27.8705 | 27.4155 | 27.6348 | 27.7383 |
| Tuba1a  | 25.2027 | 25.8536 | 25.977  | 26.5848 |
| Tuba1b  | 31.6569 | 31.726  | 31.9144 | 31.8692 |
| Tuba1c  | 27.6675 | 27.798  | 28.1151 | 28.0168 |
| Tuba4a  | 24.1236 | 23.5822 | 25.2901 | nd      |
| Tubb2b  | 27.4703 | 27.5272 | 27.9993 | 27.9329 |
| Tubb3   | 25.9131 | 26.1359 | 27.5998 | 26.9016 |
| Tubb4a  | 24.0679 | 23.6823 | 24.9746 | 24.0886 |
| Tubb4b  | 32.1516 | 32.2294 | 32.4842 | 32.4078 |
| Tubb5   | 29.1827 | 28.8451 | 28.9029 | 29.2039 |
| Tubb6   | 25.6622 | 25.7631 | 25.8944 | 25.757  |
| Tufm    | 26.6263 | 26.7519 | 26.5232 | 26.4313 |
| Twf1    | 23.787  | 24.1327 | 24.0885 | 24.1661 |
| Twf2    | 23.0734 | 23.0487 | 22.6831 | 23.0903 |
| Txn     | 27.9534 | 28.0099 | 28.1793 | 28.3634 |
| Txn2    | 23.5584 | 23.459  | 23.1107 | 22.6048 |
| Txndc17 | 25.0537 | 25.2242 | 25.1172 | 25.333  |
| Txndc5  | 26.2904 | 26.4888 | 26.4997 | 26.8405 |
| Txn11   | 24.439  | 24.7156 | 24.7246 | 24.7295 |
| Txnrd1  | 24.764  | 25.1494 | 25.1334 | 25.3398 |
| U2af1   | 23.5116 | 23.723  | 23.656  | 23.5564 |
| U2af2   | 24.5554 | 24.9748 | 24.6162 | 24.9983 |
| Uap111  | 24.0794 | 24.4241 | 24.3147 | 24.1198 |
| Uba1    | 29.4733 | 29.5684 | 29.4879 | 29.6455 |
| Uba2    | 23.4967 | 23.4726 | 23.5393 | 23.1879 |
| Uba3    | 22.4081 | 22.1676 | 22.2937 | 22.3441 |
| Uba5    | 24.5781 | 24.5091 | nd      | 24.4447 |
| Uba2l   | 22.1379 | 21.9878 | 22.3194 | 22.6717 |
| Ube2d2  | 24.7457 | 25.4008 | 24.971  | 25.1745 |
| Ube2i   | 22.7381 | 23.0842 | 22.9534 | 23.1618 |
| Ube2k   | 23.1045 | 23.2397 | nd      | 23.2646 |
| Ube2l3  | 26.7129 | 27.2474 | 26.7847 | 26.8735 |
| Ube2n   | 27.253  | 27.3601 | 27.3248 | 27.3088 |
| Ube2v2  | 24.8895 | 25.1881 | 24.5937 | 25.1353 |
| Ube3c   | 28.9801 | 28.8968 | 29.1837 | 29.092  |
| Ube4a   | nd      | 21.5201 | 20.8129 | 21.481  |
| Ube4b   | 21.9642 | 20.8287 | nd      | nd      |

|         |         |         |         |         |
|---------|---------|---------|---------|---------|
| Ubl5    | 20.1689 | 20.2696 | nd      | 19.2709 |
| Ubqln1  | 23.6503 | 23.752  | 24.173  | 23.9956 |
| Ubqln2  | nd      | 22.3949 | 22.815  | 22.8455 |
| Ubr4    | 23.5777 | 24.0276 | 23.6209 | 23.9809 |
| Ubxn1   | 23.4325 | 23.4317 | 23.0466 | 23.1927 |
| Ubxn6   | nd      | 23.1119 | 22.9727 | 23.1925 |
| Uchl1   | 27.3411 | 27.413  | 27.9841 | 27.3933 |
| Uchl3   | nd      | nd      | nd      | 23.1218 |
| Ucp1    | 27.8342 | 28.7477 | 27.221  | 25.7173 |
| Ufc1    | 24.8138 | 25.3788 | 25.1746 | 25.2694 |
| Ufd1l   | 24.0572 | 24.654  | 24.2471 | 24.4762 |
| Ufm1    | 25.0124 | 25.0998 | 24.955  | 25.1286 |
| Ugdh    | 24.7024 | 24.5859 | 25.1493 | 24.1455 |
| Uggt1   | 26.6882 | 26.696  | 26.1517 | 26.9315 |
| Ugp2    | 25.2054 | 25.4484 | 25.4196 | 25.3095 |
| Ugt1a9  | 21.2128 | 21.5358 | 21.1806 | 20.7981 |
| Umps    | 20.2749 | 20.3566 | nd      | 19.9289 |
| Unc45a  | 26.4845 | 26.7523 | 26.4455 | 26.7871 |
| Upf1    | 24.5904 | 24.9501 | 23.9781 | 24.6194 |
| Uqcr10  | 25.6253 | 25.8528 | 25.1395 | 25.0968 |
| Uqcr11  | 24.1433 | 24.6895 | 23.8054 | 24.309  |
| Uqcrb   | 26.5748 | 26.7221 | 26.0326 | 25.8491 |
| Uqcrc1  | 28.4464 | 28.5256 | 27.975  | 27.8275 |
| Uqcrc2  | 29.0059 | 29.2694 | 28.5885 | 28.4492 |
| Uqcrfs1 | 27.1826 | 27.3503 | 26.4858 | 26.657  |
| Uqcrh   | 25.0215 | 24.7437 | 24.8777 | 24.0806 |
| Uqcrq   | 26.6711 | 27.1237 | 26.6244 | 26.2534 |
| Urod    | 22.5205 | 22.5151 | 22.1621 | 22.8393 |
| Usmg5   | 21.738  | 22.2767 | 21.6015 | nd      |
| Uso1    | 23.9279 | 24.2147 | 24.1329 | 24.4415 |
| Usp14   | 24.3552 | 24.766  | 24.3286 | 24.9032 |
| Usp15   | 20.7707 | nd      | 20.5958 | 20.9075 |
| Usp20   | 25.7733 | 25.9136 | 25.3476 | 25.6922 |
| Usp4    | 23.2425 | 23.6495 | nd      | 23.2932 |
| Usp5    | 26.5524 | 26.9261 | 26.5813 | 26.5747 |
| Usp7    | 22.9781 | 22.4478 | 22.7113 | 22.4174 |
| Usp9x   | 26.1327 | 26.2022 | 26.3185 | 26.8175 |
| Vac14   | 20.6121 | 20.5098 | 20.121  | 20.7925 |
| Vapa    | 25.2256 | 25.4286 | 24.8936 | 25.2683 |
| Vapb    | 24.8345 | 24.1685 | 25.0124 | 24.111  |
| Vars    | 25.7865 | 25.6731 | 25.5361 | 25.9044 |



|          |         |         |         |         |
|----------|---------|---------|---------|---------|
| Vasn     | 22.9091 | 22.8925 | 20.7908 | 23.1825 |
| Vasp     | 26.7659 | 26.9141 | 27.0142 | 27.0263 |
| Vat1     | 28.1637 | 28.2681 | 28.2695 | 28.4683 |
| Vat1l    | nd      | nd      | 22.926  | 21.4361 |
| Vbp1     | 22.7068 | 22.8737 | 23.0971 | 23.2217 |
| Vcan     | 28.545  | 28.5197 | 28.564  | 28.6555 |
| Vcl      | 32.7644 | 32.7513 | 32.9748 | 32.8711 |
| Vcp      | 29.4034 | 29.3881 | 29.4261 | 29.4984 |
| Vdac1    | 28.457  | 28.3903 | 28.3264 | 28.3249 |
| Vdac2    | 27.2377 | 27.4364 | 27.0639 | 27.1891 |
| Vdac3    | 24.6493 | 25.2132 | 25.5271 | 25.4735 |
| Vim      | 34.3679 | 34.3572 | 34.6466 | 34.5175 |
| Vkorc1   | 23.139  | 22.8996 | 23.5169 | nd      |
| Vkorc1l1 | 21.3886 | 21.7011 | 21.5143 | 22.0291 |
| Vps25    | 23.5754 | 24.309  | 24.0277 | 24.352  |
| Vps26b   | 22.4926 | 22.714  | 22.7917 | 23.1637 |
| Vps28    | 22.2895 | 22.6825 | 22.9602 | 22.1611 |
| Vps29    | 25.0569 | 25.4446 | 25.0941 | 25.9075 |
| Vps35    | 26.7416 | 26.8711 | 26.7572 | 26.9591 |
| Vps35l   | 20.475  | 21.0778 | nd      | 20.3381 |
| Vps36    | 22.8    | 22.7194 | nd      | 23.3396 |
| Vps45    | 21.7548 | 21.9087 | 21.6894 | nd      |
| Vps4a    | 21.7383 | 21.863  | nd      | 22.2283 |
| Vps4b    | 24.9667 | 25.2241 | 24.9039 | 25.4468 |
| Vta1     | 21.8734 | 21.915  | 22.4992 | 22.5027 |
| Vtn      | 26.0338 | 25.7532 | 25.928  | 25.9993 |
| Vwa1     | 26.0358 | 25.6442 | 26.3856 | 26.3009 |
| Vwa5a    | 25.5985 | 25.8507 | 25.857  | 25.6769 |
| Vwa5b2   | 26.9349 | 27.077  | 27.6457 | 27.1648 |
| Vwa8     | 22.7801 | 22.9297 | 22.6679 | nd      |
| Vwf      | 27.3961 | 27.2474 | 26.9372 | 27.0855 |
| Wars     | 24.72   | 24.7527 | 24.9736 | 24.929  |
| Wbp2     | 22.2748 | 22.8125 | 22.9714 | 23.6584 |
| Wdr1     | 29.2281 | 29.3161 | 29.2661 | 29.2218 |
| Wdr47    | 23.2023 | nd      | nd      | nd      |
| Wdr61    | 23.8527 | 23.8415 | 23.0747 | 23.6038 |
| Wfs1     | 27.4093 | 27.4614 | 27.8795 | 27.8583 |
| Wisp2    | 26.4053 | 26.642  | 26.8485 | 26.9052 |
| Xdh      | 24.0378 | 24.5199 | 24.0542 | 24.1874 |
| Xirp1    | 25.2694 | 25.6013 | 25.6918 | 25.5695 |
| Xpnpep1  | 23.5114 | 24.0317 | 23.3329 | 24.0647 |

|          |         |         |         |         |
|----------|---------|---------|---------|---------|
| Xpo1     | 25.716  | 25.8601 | 25.548  | 25.6673 |
| Xxylt1   | nd      | 22.0811 | 21.9667 | 21.8358 |
| Yars     | 24.5448 | 24.3915 | 24.2784 | 24.8842 |
| Ybx1     | 22.2544 | 20.7801 | 21.9525 | nd      |
| Yes1     | nd      | 22.6578 | 22.6167 | 22.2778 |
| Ykt6     | nd      | 23.6273 | 22.8501 | 23.8245 |
| Ywhab    | 27.6562 | 27.4553 | 27.8884 | 27.1402 |
| Ywhae    | 28.4298 | 27.9743 | 28.4497 | 28.0594 |
| Ywhag    | 28.2724 | 28.2264 | 28.044  | 27.7747 |
| Ywhah    | 26.164  | 25.8174 | 25.7888 | 25.7771 |
| Ywhaq    | 28.7041 | 28.8678 | 28.7429 | 28.6984 |
| Ywhaz    | 30.2837 | 30.0788 | 30.2467 | 30.0041 |
| Zak      | 24.8366 | 24.7146 | 23.9332 | 24.1745 |
| Zc3h4    | nd      | nd      | 20.5562 | 21.795  |
| Zfp36l1  | nd      | 19.4717 | 19.2953 | 19.5687 |
| Zfp58    | 22.8537 | 22.8988 | 23.4486 | 23.0542 |
| Zmpste24 | 23.2572 | 23.3882 | 23.706  | 23.3683 |
| Zw10     | 22.6902 | 22.0982 | 21.8976 | nd      |
| Zyx      | 29.5508 | 30.0181 | 29.8769 | 30.2238 |

represents Label-free Quantification values generated by MaxQuant, and nd represents no

| Log2(LFQ Col8+/_1) | Log2(LFQ Col8+/_2) | Log2(LFQ Col8+/_3) | Log2(LFQ Col8+/_4) |
|--------------------|--------------------|--------------------|--------------------|
| 30.1708            | 30.1603            | 30.0454            | 29.9287            |
| 24.8811            | 25.1894            | 25.308             | 25.2461            |
| 21.0703            | 22.4653            | 21.123             | 22.2925            |
| 24.537             | 24.9025            | 24.6921            | 24.3439            |
| 22.3686            | 22.8104            | 22.4894            | 21.8387            |
| 23.1321            | 23.6406            | 23.1209            | 21.9367            |
| 23.751             | 23.7646            | 23.449             | 23.4521            |
| 23.1487            | 23.3147            | 23.2932            | 23.1325            |
| 21.4128            | 21.7252            | 21.5389            | 21.8794            |
| 23.9949            | 24.1193            | 24.0926            | 23.9616            |
| 24.3836            | 24.4967            | 24.802             | 24.5638            |
| 25.9276            | 25.8913            | 25.7715            | 25.8002            |
| 24.5031            | 24.6546            | 24.9246            | 24.9879            |
| 23.9668            | 24.0126            | 23.5502            | 23.8508            |
| 23.3882            | 23.1702            | 23.4796            | nd                 |
| nd                 | 22.3546            | nd                 | 21.4025            |
| 25.4507            | 25.5605            | 25.5847            | 25.3421            |
| 25.7543            | 25.7842            | 25.8295            | 25.999             |
| 30.4435            | 28.9982            | 29.732             | 29.2719            |
| 25.1964            | 24.982             | 25.0282            | 25.9006            |
| 23.0286            | nd                 | 22.1216            | 21.5955            |
| 23.427             | 23.4248            | 24.0045            | 23.7554            |
| 29.5423            | 28.3667            | 28.8943            | 28.7199            |
| 29.3306            | 28.2904            | 28.8512            | 28.6159            |
| 27.9961            | 26.9768            | 27.3755            | 27.2771            |
| 25.5497            | 25.4193            | 25.6741            | 25.6911            |
| 29.1858            | 28.031             | 28.5222            | 28.2582            |
| 27.0393            | 27.1305            | 27.6087            | 26.1985            |
| 29.4413            | 28.9202            | 29.1792            | 29.1618            |
| 25.3835            | 25.3416            | 25.2513            | 25.7317            |
| 28.9889            | 28.8696            | 28.8516            | 28.7362            |
| 22.8756            | 23.3797            | 22.9497            | 22.6507            |
| 28.0923            | 28.1964            | 28.0664            | 28.1389            |
| 26.8921            | 26.8014            | 26.4426            | 26.7281            |
| 30.9005            | 29.7032            | 30.2692            | 29.9633            |
| nd                 | nd                 | nd                 | 23.0221            |
| 24.7496            | 24.0361            | 24.3496            | 23.6231            |
| 25.5413            | 24.8672            | 25.1907            | 25.4164            |

|         |         |         |         |
|---------|---------|---------|---------|
| 21.5865 | 23.3876 | 22.7952 | 23.3171 |
| 26.7502 | 26.4057 | 26.4866 | 26.6055 |
| 24.916  | 25.1452 | 25.0706 | 25.1169 |
| 23.6208 | 22.2646 | 22.1553 | 22.5472 |
| nd      | nd      | nd      | nd      |
| 28.8091 | 28.3353 | 28.4815 | 28.4665 |
| 21.2002 | nd      | nd      | 21.2796 |
| 32.2501 | 32.1095 | 32.1676 | 32.2407 |
| 26.9659 | 27.1649 | 27.3608 | 27.3555 |
| 35.4912 | 35.3949 | 35.3331 | 35.335  |
| 33.5271 | 33.4486 | 33.4696 | 33.5092 |
| 22.4723 | 22.7391 | 23.1365 | 23.0834 |
| 31.9553 | 31.8595 | 32.0572 | 32.0407 |
| 28.8638 | 28.9744 | 29.1506 | 29.2555 |
| 24.0075 | 23.3805 | 23.5356 | 23.731  |
| 24.7062 | 25.1888 | 24.747  | 24.6313 |
| 27.1744 | 27.281  | 27.2294 | 27.1268 |
| 28.4233 | 28.3845 | 28.0525 | 28.2228 |
| 29.5463 | 29.3569 | 29.4348 | 29.4731 |
| 23.8051 | 23.9822 | 23.6464 | 24.2879 |
| 20.5499 | nd      | 20.9992 | 21.0286 |
| 23.0296 | 22.8471 | nd      | 23.2393 |
| 25.2183 | 23.7532 | 24.7387 | 24.2173 |
| 25.1741 | 25.2891 | 25.4419 | 24.969  |
| 21.8462 | 21.6649 | nd      | 21.1201 |
| 25.9078 | 26.1221 | 25.8426 | 26.0277 |
| 22.502  | 22.7685 | 23.4707 | 23.605  |
| 25.6316 | 25.8109 | 25.3529 | 25.8082 |
| 26.8124 | 27.036  | 26.754  | 26.9618 |
| 23.7626 | nd      | nd      | 24.8765 |
| 24.9502 | 24.9939 | 24.9425 | 25.1609 |
| 24.8699 | 26.3599 | 26.0887 | 25.9708 |
| 21.2913 | 21.6144 | 21.7301 | 21.5686 |
| 21.6829 | 21.9133 | 21.62   | nd      |
| nd      | 21.9804 | nd      | 21.7577 |
| 25.6882 | 25.503  | 25.3575 | 25.4811 |
| 22.3022 | nd      | 22.3426 | 21.9046 |
| 28.1672 | 28.158  | 28.1891 | 28.014  |
| 22.4669 | 22.4429 | 22.6883 | 21.824  |
| 21.0607 | 21.2507 | 20.5798 | 20.1407 |
| 22.0461 | 21.8315 | 22.3475 | nd      |

|         |         |         |         |
|---------|---------|---------|---------|
| nd      | nd      | nd      | nd      |
| 23.5122 | 23.9202 | 23.3836 | 23.7208 |
| 23.2633 | 24.6173 | 23.1975 | 24.2789 |
| 22.5424 | nd      | 22.0173 | 22.7118 |
| 25.3547 | 25.3053 | 25.5043 | 25.2585 |
| 26.3724 | 26.416  | 26.2024 | 27.069  |
| 23.5221 | 23.435  | 23.9812 | 24.246  |
| 24.2935 | 24.2002 | 24.2384 | 24.2087 |
| 29.1887 | 29.6811 | 29.7453 | 29.8179 |
| 24.8315 | 23.9174 | 24.7345 | 24.3434 |
| nd      | nd      | nd      | nd      |
| 24.9505 | 24.5402 | 25.0474 | 25.1965 |
| 23.8736 | 23.8607 | 23.8951 | 23.807  |
| 23.1258 | nd      | 22.7313 | 23.4838 |
| 27.9117 | 27.4433 | 27.6017 | 27.5958 |
| 27.0854 | 27.1068 | 27.1978 | 26.9086 |
| 27.0258 | 26.8553 | 27.1235 | 27.1189 |
| 25.5479 | 25.8621 | 25.4981 | 25.7787 |
| 27.1912 | 27.0344 | 27.2809 | 27.2614 |
| 27.7317 | 27.9595 | 27.8064 | 28.0422 |
| 23.6278 | 23.6349 | 23.5329 | 24.3247 |
| 25.4392 | 25.4458 | 25.3212 | 24.8132 |
| 24.8094 | 24.5436 | 24.6764 | 24.9689 |
| 22.0255 | 21.5125 | 21.7737 | 22.3619 |
| nd      | 23.4275 | 23.3462 | 23.2288 |
| 34.2796 | 34.3765 | 34.2411 | 34.4656 |
| 25.2246 | 25.2626 | 24.1493 | 24.9882 |
| nd      | nd      | nd      | 20.7917 |
| 21.6801 | nd      | nd      | 21.8897 |
| 23.4288 | 24.1158 | 23.3605 | 24.0674 |
| 23.1898 | 22.9239 | 22.9255 | 21.8643 |
| 30.565  | 30.5989 | 30.6081 | 30.6585 |
| 25.8186 | 26.0068 | 25.7211 | 26.0453 |
| 24.1787 | 24.0904 | 24.4828 | 24.8883 |
| 22.3546 | 21.9099 | nd      | 21.843  |
| 28.3001 | 27.8012 | 27.9771 | 28.0317 |
| 26.7894 | 26.6499 | 26.5978 | 26.9055 |
| 25.8431 | 25.9659 | 25.773  | 25.9321 |
| 30.1571 | 29.5425 | 29.5077 | 29.5545 |
| nd      | 21.6039 | 21.6903 | 22.4968 |
| 21.3021 | nd      | 20.8108 | 21.3148 |

|         |         |         |         |
|---------|---------|---------|---------|
| 24.1077 | nd      | 23.8981 | 24.3188 |
| nd      | 22.2799 | 22.0214 | 22.1493 |
| 26.663  | 27.1357 | 26.7756 | 26.6795 |
| 23.9136 | 23.8833 | 23.1943 | 23.4672 |
| 22.2918 | 21.2712 | 22.2927 | 20.8939 |
| 23.9573 | 24.2505 | 23.7124 | 24.0153 |
| 24.3095 | 24.6308 | 24.4866 | 24.9465 |
| 25.3909 | 24.9413 | 25.1572 | 25.7293 |
| 25.0451 | 24.6044 | 24.8477 | 24.6305 |
| 25.5645 | 24.6776 | 25.1593 | 25.5096 |
| 28.3545 | 28.3959 | 28.4909 | 29.1292 |
| 29.6979 | 29.6313 | 29.8354 | 29.7505 |
| 27.911  | 27.9342 | 27.8535 | 27.6647 |
| 31.9547 | 31.8533 | 31.9971 | 32.1223 |
| 28.623  | 28.7076 | 28.4852 | 28.5327 |
| 27.5423 | 27.5495 | 27.6776 | 27.6078 |
| 31.1281 | 31.1183 | 31.0428 | 31.1527 |
| 31.3622 | 31.2727 | 31.271  | 31.3084 |
| 27.6092 | 27.7643 | 27.6142 | 27.6232 |
| 31.7217 | 31.7445 | 31.6535 | 31.6597 |
| 23.4633 | 23.472  | 23.4125 | 23.3446 |
| 24.0726 | 24.7387 | 24.7981 | 24.7408 |
| 22.7498 | 22.7025 | 22.9954 | 23.3631 |
| 26.9988 | 27.0817 | 26.8635 | 26.8927 |
| 27.9826 | 28.1039 | 27.9739 | 27.9746 |
| 27.969  | 27.9815 | 28.0015 | 27.8691 |
| 26.6348 | 26.6987 | 26.7    | 26.6744 |
| 24.4296 | 24.6636 | 24.6956 | 24.6031 |
| 24.1406 | 23.5684 | 23.6645 | 24.0699 |
| 22.7423 | 22.8143 | 22.5942 | 22.5853 |
| nd      | nd      | nd      | nd      |
| 23.6426 | 23.6016 | 23.4173 | 23.9015 |
| 24.167  | 24.2506 | 24.4972 | 24.6668 |
| 23.4409 | 23.7931 | 22.9421 | 20.34   |
| 28.6907 | 28.6487 | 28.8166 | 28.9146 |
| 27.0997 | 26.9908 | 26.9033 | 27.2648 |
| 25.9585 | 25.6772 | 25.8261 | 24.4681 |
| 27.2278 | 27.418  | 27.4717 | 27.3019 |
| 24.3667 | 24.3537 | 24.621  | nd      |
| 24.0217 | 24.3009 | 24.4743 | 24.282  |
| 25.1611 | 24.9298 | 25.4103 | 25.4487 |

|         |         |         |         |
|---------|---------|---------|---------|
| 26.9064 | 27.2366 | 27.3385 | 27.1266 |
| 22.621  | 22.5828 | 22.4955 | 22.8657 |
| 24.6234 | 24.0428 | 24.2867 | 24.3125 |
| 23.9588 | 24.8423 | 25.3061 | 24.3618 |
| 24.015  | 24.096  | 23.9582 | 24.1642 |
| 25.0939 | 25.4573 | 25.2543 | 24.9721 |
| 24.6011 | 25.7116 | 25.9954 | 25.7455 |
| 25.1895 | 25.0784 | 25.1295 | 25.6237 |
| 27.5869 | 27.6214 | 27.3487 | 27.5859 |
| 21.6361 | 21.7695 | 21.9142 | 21.6701 |
| 24.8738 | 26.3853 | 26.3669 | 26.0919 |
| nd      | 22.8174 | 22.5807 | 23.2041 |
| nd      | 21.8077 | 21.6756 | 22.5689 |
| 20.793  | 20.6007 | 20.9209 | 23.0282 |
| 26.5326 | 26.5625 | 26.4049 | 26.2069 |
| 23.5373 | 24.002  | 21.9295 | 23.0576 |
| 27.7499 | 27.7427 | 27.7505 | 27.639  |
| 28.3332 | 28.2736 | 28.4131 | 28.4413 |
| 23.7455 | 23.7515 | 23.8009 | 24.1955 |
| 23.6583 | 23.4785 | nd      | 23.5933 |
| 23.3255 | nd      | 22.935  | 23.0016 |
| 23.4629 | 23.8793 | 23.9502 | 24.3537 |
| 25.1466 | 25.2673 | 25.3973 | 25.1654 |
| 22.8359 | 22.9717 | 22.863  | 22.8974 |
| 25.7843 | 25.5565 | 25.721  | 25.6171 |
| 24.7375 | 25.1394 | 23.9689 | 24.6904 |
| 23.9767 | 23.8237 | 24.1249 | 23.34   |
| 28.4148 | 28.3871 | 28.198  | 28.3564 |
| 27.3684 | 27.5792 | 27.4277 | 27.2152 |
| 27.5456 | 27.5797 | 27.5324 | 27.7517 |
| 28.3026 | 28.3358 | 28.1397 | 28.3615 |
| 25.3744 | 25.5102 | 25.5578 | 25.6383 |
| 24.8581 | 24.7914 | 24.5927 | 24.4928 |
| 25.329  | 25.1876 | 25.1656 | 25.8605 |
| 23.6685 | 23.4777 | 23.5961 | 23.9332 |
| 24.0469 | 23.7233 | 23.891  | 23.9624 |
| 25.9397 | 25.9251 | 25.9485 | 25.8263 |
| 31.5389 | 31.557  | 31.582  | 31.489  |
| 22.4458 | 22.4024 | nd      | 22.4225 |
| 21.8855 | nd      | 22.182  | 21.7819 |
| 22.6302 | 22.2991 | 23.3757 | 22.5435 |

|         |         |         |         |
|---------|---------|---------|---------|
| 22.2189 | 22.5169 | 22.5731 | 22.2475 |
| 27.5201 | 27.6686 | 27.4343 | 27.6252 |
| 21.9967 | 22.4426 | 22.5475 | 22.8055 |
| 28.017  | 28.0087 | 27.8639 | 27.7742 |
| 25.6788 | 26.0119 | 26.0146 | 26.3491 |
| 27.3483 | 27.4546 | 27.4097 | 27.5029 |
| 25.3248 | 24.8641 | 25.1896 | 25.1452 |
| 25.0115 | 25.5683 | 25.0647 | 25.0667 |
| 25.6334 | 25.5892 | 25.6823 | 25.1964 |
| 27.817  | 27.6276 | 27.4221 | 27.6274 |
| 23.5086 | 23.4268 | 23.397  | 23.987  |
| 20.6871 | 22.0313 | 20.3497 | 22.2561 |
| 26.2478 | 26.4251 | 26.2465 | 26.1643 |
| 30.6393 | 30.6755 | 30.6347 | 30.6997 |
| 31.5767 | 31.5156 | 31.4715 | 31.6283 |
| 27.0503 | 27.0077 | 27.0571 | 26.9657 |
| 27.6405 | 28.0799 | 27.6655 | 28.0114 |
| 27.3282 | 27.1546 | 27.3253 | 27.3944 |
| 24.9648 | 24.5404 | 24.3307 | 24.6561 |
| 23.1335 | nd      | 23.2481 | 23.7306 |
| 26.2211 | 26.1958 | 26.2528 | 26.5918 |
| 26.0903 | 26.1144 | 25.8125 | 26.3047 |
| 29.0764 | 29.0192 | 28.8148 | 29.0978 |
| nd      | 21.4133 | nd      | 21.6156 |
| 23.9042 | nd      | 23.7257 | 23.6135 |
| 25.4159 | 25.4375 | 25.3096 | 25.2678 |
| 21.0142 | 20.2442 | 21.1536 | 21.6531 |
| 23.628  | 23.6837 | 23.024  | 23.9158 |
| 22.3058 | 22.676  | 21.9676 | nd      |
| 23.2945 | 22.5641 | 22.797  | 23.0496 |
| 23.1368 | 22.9475 | 23.4649 | 23.7692 |
| 24.9943 | 24.8729 | 24.8633 | 24.42   |
| 22.41   | nd      | 22.4377 | 22.1752 |
| 24.8257 | 24.9069 | 24.7834 | 25.1133 |
| nd      | 21.9068 | 21.7735 | 22.0864 |
| 23.8923 | 23.8688 | 23.7882 | 23.9269 |
| 27.7968 | 27.838  | 27.8779 | 27.9019 |
| 22.7377 | 23.1243 | 22.7685 | 22.9426 |
| 28.276  | 28.2778 | 28.4302 | 28.2215 |
| nd      | 21.104  | nd      | nd      |
| nd      | 21.2662 | 21.1309 | 21.0255 |



|         |         |         |         |
|---------|---------|---------|---------|
| 26.083  | 26.1053 | 26.078  | 25.8136 |
| 23.9639 | 23.6584 | 23.8437 | 23.6222 |
| 24.715  | 23.5736 | 23.9929 | 23.9809 |
| 21.754  | 22.9392 | 22.4545 | 22.379  |
| 31.8511 | 31.9223 | 31.9527 | 31.8062 |
| 24.6325 | 24.9916 | 25.1234 | 25.1942 |
| 24.651  | 25.0328 | 24.1241 | 24.0074 |
| 25.1092 | 25.6451 | 25.5856 | 25.5275 |
| 20.3269 | 20.7525 | 20.163  | 20.8914 |
| 25.6067 | 25.4214 | 25.4622 | 25.6707 |
| 24.3994 | 24.8517 | 24.5109 | 24.62   |
| 22.0699 | 22.0435 | 21.9928 | nd      |
| 22.01   | 22.1765 | 22.522  | 22.3223 |
| nd      | nd      | 21.5288 | nd      |
| 19.6496 | 20.0855 | 21.102  | 20.5535 |
| 24.205  | 25.4784 | 24.7826 | 24.4796 |
| 24.9146 | 24.3672 | 24.6558 | 24.9502 |
| 27.8623 | 27.8274 | 27.6742 | 27.7872 |
| 27.8511 | 27.6388 | 27.605  | 27.506  |
| 25.3713 | 25.1862 | 25.7772 | 25.4912 |
| 22.8014 | 23.0953 | 23.0662 | 22.4663 |
| 21.4528 | 21.6306 | 21.8852 | 21.6812 |
| 23.335  | 21.6451 | 22.9459 | 23.7088 |
| 27.7485 | 27.8049 | 27.3961 | 27.7228 |
| 29.8693 | 29.7453 | 29.1967 | 29.8244 |
| 25.4059 | 25.4492 | 25.354  | 25.3505 |
| 26.7514 | 26.8292 | 27.1577 | 26.8708 |
| nd      | 22.6701 | 22.2644 | 22.7483 |
| 22.6627 | 22.9475 | 22.4627 | 22.5714 |
| 27.0607 | 26.9363 | 26.9534 | 27.1658 |
| 27.4105 | 27.3945 | 27.4849 | 27.8513 |
| 24.7231 | 24.7891 | 24.6949 | 23.8201 |
| 23.4179 | 23.3312 | 22.9901 | 23.3328 |
| 27.531  | 27.3687 | 27.6655 | 27.4021 |
| 26.2673 | 25.9066 | 26.0785 | 25.7418 |
| 22.2065 | 22.8317 | 22.1418 | 21.8643 |
| 28.2405 | 28.3396 | 28.2212 | 28.3565 |
| 28.0571 | 27.868  | 28.134  | 28.4719 |
| 30.5449 | 30.7832 | 30.5417 | 30.2679 |
| 27.0132 | 27.0328 | 26.6313 | 26.6994 |
| 25.3149 | 25.4858 | 25.2971 | 25.7165 |

|         |         |         |         |
|---------|---------|---------|---------|
| 24.642  | 24.3042 | 24.7272 | 24.2299 |
| 28.6519 | 28.865  | 28.4424 | 28.3836 |
| 28.6402 | 28.6829 | 28.4917 | 28.3127 |
| 21.7626 | 22.5857 | 21.9312 | 22.0242 |
| 24.9977 | 25.0153 | 24.9708 | 25.0455 |
| 27.6373 | 27.6245 | 27.6713 | 27.868  |
| 27.2126 | 27.2324 | 27.3806 | 27.3926 |
| nd      | 23.3724 | 23.9453 | 24.6656 |
| 25.5118 | 25.7486 | 25.3632 | 25.4807 |
| 22.219  | 22.3435 | 22.3076 | 21.9836 |
| nd      | 21.1562 | 22.0012 | 21.4822 |
| 21.435  | 21.0284 | nd      | 20.0447 |
| nd      | nd      | nd      | 21.511  |
| 29.2666 | 27.8587 | 27.6724 | 27.2357 |
| 24.4586 | 24.2676 | 24.2735 | 24.0488 |
| 25.2958 | 24.6748 | 25.1904 | 25.2213 |
| 29.2067 | 29.2517 | 29.2001 | 29.101  |
| 25.8742 | 25.4188 | 25.5867 | 25.874  |
| 26.2879 | 26.4253 | 26.276  | 26.3832 |
| 29.6464 | 29.6309 | 29.6586 | 29.6459 |
| 24.2089 | 23.899  | 23.8832 | 24.3553 |
| 22.4096 | nd      | 22.0382 | nd      |
| 21.9831 | 22.2383 | 21.7434 | 22.4451 |
| 22.954  | 21.8617 | nd      | 22.6102 |
| 21.9276 | 21.9843 | 21.6299 | 21.7598 |
| 24.3279 | 23.8241 | 24.0258 | 24.7896 |
| 23.7519 | 24.2971 | 24.6312 | 23.9606 |
| 25.4341 | 23.5595 | 25.1988 | 25.4877 |
| 21.9373 | nd      | nd      | nd      |
| 28.1143 | 27.9316 | 27.995  | 28.1458 |
| 27.4045 | 27.2283 | 27.2134 | 27.5153 |
| 26.9018 | 26.8656 | 26.7604 | 26.944  |
| 27.7448 | 27.6398 | 27.6338 | 27.8577 |
| 27.0083 | 27.0635 | 27.1303 | 27.0379 |
| 27.2483 | 27.0172 | 27.1146 | 27.0772 |
| 26.7283 | 26.7799 | 26.5707 | 27.0718 |
| 26.0606 | 26.657  | 26.4658 | 25.5854 |
| 24.1471 | 24.73   | 24.699  | 24.4252 |
| 22.849  | 21.8631 | 22.5426 | 22.6973 |
| 25.5724 | 25.4881 | 25.6101 | 25.5133 |
| 23.4057 | 23.9492 | 23.5356 | 23.2593 |

|         |         |         |         |
|---------|---------|---------|---------|
| 24.7957 | 24.6981 | 24.9449 | 25.0731 |
| 27.1623 | 26.6706 | 26.9358 | 27.4493 |
| 21.8824 | nd      | nd      | 22.1177 |
| 24.3924 | 24.6498 | 24.41   | 24.2912 |
| 27.902  | 27.9742 | 27.9721 | 27.881  |
| 26.901  | 26.7209 | 26.8002 | 25.6503 |
| 24.7355 | 24.7594 | 24.7134 | 24.4793 |
| 19.6522 | 20.6784 | 19.8951 | 21.1066 |
| 24.6092 | 24.5231 | 24.5078 | 24.829  |
| 27.2336 | 27.4263 | 27.4123 | 27.3642 |
| 23.9423 | 24.2093 | 24.294  | 23.9412 |
| 28.2818 | 28.4571 | 28.3506 | 28.3189 |
| 20.9836 | 21.6462 | 21.6786 | 20.9945 |
| 21.0767 | 22.5225 | nd      | 21.8215 |
| nd      | 21.6539 | 21.9721 | 21.6842 |
| nd      | nd      | nd      | 22.2006 |
| 24.477  | 24.2399 | 24.1429 | 23.7737 |
| 23.0945 | 23.515  | 23.7285 | 23.1171 |
| 24.5657 | 24.4639 | 24.586  | 25.241  |
| 27.7636 | 27.8631 | 27.7453 | 27.5646 |
| 29.3359 | 28.8863 | 29.0227 | 29.4275 |
| 24.3823 | 25.4156 | 24.476  | 24.2647 |
| 22.6557 | 21.8464 | 23.2031 | 23.6128 |
| 27.9377 | 27.6477 | 28.0261 | 27.6375 |
| 22.7217 | 23.1538 | 22.6567 | 23.468  |
| 29.4399 | 29.3904 | 29.3788 | 29.4021 |
| 25.5235 | 25.403  | 25.4212 | 25.0324 |
| nd      | 23.5787 | 24.058  | 24.1962 |
| 23.4065 | 24.0604 | 23.5902 | 23.4098 |
| 24.6063 | 24.3888 | 24.3557 | 24.3778 |
| nd      | nd      | nd      | 22.6614 |
| 23.7528 | 22.949  | nd      | 22.6768 |
| 21.6015 | 21.3214 | 21.4394 | 21.6028 |
| 22.1559 | nd      | 22.2725 | 23.4387 |
| 25.3953 | 24.8116 | 24.8621 | 25.3023 |
| 26.8231 | 26.9983 | 26.6596 | 26.7959 |
| 30.7218 | 30.6466 | 30.6376 | 30.5223 |
| 29.8907 | 26.072  | 26.2588 | 27.2384 |
| 23.9453 | 24.6103 | 23.5612 | 23.4385 |
| 22.8062 | 22.5064 | 22.5868 | nd      |
| nd      | nd      | 22.2931 | 23.1608 |

|         |         |         |         |
|---------|---------|---------|---------|
| 24.8361 | 24.7811 | 24.8808 | 24.8461 |
| 26.689  | 26.9392 | 26.7035 | 26.8441 |
| 28.0694 | 27.9983 | 27.9163 | 27.7358 |
| 20.7172 | 21.4976 | nd      | 21.3706 |
| 22.1196 | 22.3829 | nd      | 21.8652 |
| 23.2145 | 23.2731 | nd      | 22.5417 |
| 30.6576 | 30.7407 | 30.6098 | 30.8312 |
| 26.979  | 26.932  | 26.9776 | 26.6081 |
| 25.7954 | 25.0453 | 25.3834 | 25.2814 |
| 27.6089 | 27.6469 | 27.5774 | 28.4256 |
| 25.1273 | 25.1857 | 25.0606 | 24.7968 |
| 24.0834 | 24.0311 | 24.1658 | 24.0076 |
| 25.6732 | 25.73   | 26.0652 | 26.1588 |
| 31.9071 | 31.704  | 31.8713 | 31.5802 |
| 28.4228 | 28.2655 | 28.1669 | 28.1745 |
| 28.2401 | 28.0181 | 28.201  | 28.1558 |
| 22.3429 | 23.9774 | 21.2935 | 23.6624 |
| 22.0034 | 21.9962 | 22.0115 | 22.2683 |
| nd      | 22.5459 | 22.0089 | 22.3277 |
| 22.4611 | 22.758  | 22.9713 | nd      |
| 22.9628 | 21.7477 | 22.3047 | 22.6139 |
| nd      | 23.4937 | nd      | 21.1564 |
| 29.8475 | 29.7375 | 29.4427 | 29.4035 |
| 29.6416 | 29.7861 | 29.6423 | 29.6699 |
| 30.7853 | 30.8345 | 30.9073 | 30.6915 |
| 33.6667 | 33.5112 | 33.6828 | 33.6793 |
| 32.8741 | 32.8649 | 33.0224 | 33.1391 |
| 30.6723 | 30.6113 | 30.9679 | 31.1728 |
| 26.8781 | 27.3894 | 27.5379 | 27.0989 |
| 30.733  | 30.8645 | 30.9651 | 30.868  |
| 30.4682 | 30.5151 | 30.6419 | 30.4543 |
| 24.8255 | 24.6897 | 24.6706 | 24.8467 |
| 23.4378 | nd      | 23.6656 | 23.1317 |
| 27.8888 | 27.7776 | 28.1918 | 28.3388 |
| 27.7367 | 27.6375 | 27.7746 | 27.8284 |
| 32.4701 | 32.4453 | 32.4051 | 32.2686 |
| 32.1016 | 31.9529 | 32.0825 | 32.1414 |
| 25.8225 | 25.795  | 25.9282 | 26.0383 |
| 29.9841 | 29.8639 | 29.7493 | 29.7671 |
| 23.3512 | 22.7285 | 22.907  | 23.5775 |
| 22.9448 | 23.0181 | 22.5793 | 23.0352 |

|         |         |         |         |
|---------|---------|---------|---------|
| nd      | 21.8133 | nd      | 20.4918 |
| 23.4823 | 23.602  | 23.7572 | 24.0778 |
| 24.6675 | 24.3304 | 24.6327 | 24.7721 |
| nd      | 22.1067 | 22.2109 | 21.9984 |
| 26.7807 | 26.9157 | 26.3965 | 26.8831 |
| 26.4741 | 26.2493 | 26.0736 | 26.2063 |
| 24.2995 | 23.9621 | 24.2634 | 24.0501 |
| 25.0762 | 24.9732 | 24.8699 | 25.0504 |
| 26.6137 | 26.475  | 26.5616 | 26.4985 |
| nd      | 22.5877 | 22.4087 | 22.3671 |
| 25.851  | 25.9747 | 25.9134 | 26.3088 |
| 25.1538 | 25.2445 | 25.0654 | 25.2076 |
| 23.6658 | 24.2951 | 24.3124 | 24.4285 |
| 23.9695 | 24.3454 | 23.8635 | 23.9515 |
| nd      | nd      | nd      | nd      |
| 23.8188 | 23.9912 | 23.793  | 23.4292 |
| 22.6282 | 22.7059 | 23.2831 | 23.3569 |
| 21.9278 | 21.8431 | 21.8109 | nd      |
| 24.2315 | 23.0628 | 23.5518 | 24.134  |
| 24.8361 | 24.101  | 24.2005 | 24.1483 |
| 22.2333 | 22.6911 | 22.4042 | 22.7877 |
| 25.5475 | 25.5628 | 25.7856 | 25.3455 |
| 28.0428 | 28.0531 | 27.9381 | 27.8064 |
| 20.9127 | 21.9485 | 21.7727 | 22.5428 |
| 27.5205 | 26.5235 | 26.7768 | 26.8044 |
| 29.3311 | 28.2125 | 28.5715 | 28.3903 |
| 26.4486 | 25.3238 | 25.7417 | 26.1078 |
| 28.8431 | 27.96   | 28.4081 | 28.1201 |
| 27.9718 | 26.6843 | 27.1618 | 27.5881 |
| 26.4673 | 25.4087 | 25.7981 | 25.879  |
| 26.8306 | 24.8178 | 25.7509 | 25.1744 |
| 25.2302 | 24.7007 | 24.9843 | 25.175  |
| 24.7724 | 23.9905 | 24.1679 | 23.9724 |
| 25.8205 | 25.8752 | 25.9273 | 25.9672 |
| 27.7972 | 27.7773 | 27.8434 | 28.6428 |
| 23.6012 | 24.0394 | 23.7584 | 23.8534 |
| 26.5473 | 26.6525 | 26.5139 | 26.4493 |
| 22.3317 | 23.055  | 22.5096 | 22.5253 |
| 26.2036 | 26.8598 | 26.6196 | 26.3313 |
| nd      | nd      | nd      | 21.2274 |
| 22.2394 | 22.1215 | nd      | 22.1556 |

|         |         |         |         |
|---------|---------|---------|---------|
| 24.2446 | 24.459  | 24.2184 | 24.6726 |
| 25.1391 | 25.1804 | 25.7344 | 25.6109 |
| 23.5752 | 24.1223 | 24.1842 | 24.3438 |
| 23.9384 | 24.851  | 24.3246 | 24.2237 |
| 25.5026 | 24.2884 | 24.359  | 23.9494 |
| 26.8055 | 25.8658 | 26.541  | 25.7665 |
| 23.8873 | 21.3897 | nd      | nd      |
| 25.3493 | 24.803  | 24.9612 | 24.7354 |
| nd      | nd      | 21.2339 | nd      |
| 29.8854 | 29.4585 | 29.872  | 29.9791 |
| 29.5577 | 29.5673 | 29.7748 | 29.7861 |
| 25.1468 | 25.1692 | 25.159  | 24.5908 |
| 23.2072 | 23.2874 | 22.8013 | 23.1955 |
| 25.6616 | 25.4654 | 25.3462 | 25.3244 |
| 24.782  | 25.269  | 25.2218 | 24.3286 |
| 23.3149 | 22.7595 | 23.5042 | 24.0619 |
| 30.397  | 29.548  | 29.9373 | 29.6358 |
| 25.6397 | 25.733  | 25.5897 | 25.6045 |
| 27.5763 | 27.6907 | 27.3978 | 27.698  |
| 23.5844 | nd      | 23.3013 | 23.8557 |
| 21.9829 | 22.8692 | 22.2753 | 22.7294 |
| 25.0214 | 24.8805 | 24.8624 | 25.1017 |
| 23.7265 | 23.2636 | 23.7963 | 23.3535 |
| 28.6648 | 28.7001 | 28.6585 | 28.5904 |
| 29.6559 | 29.5207 | 29.6536 | 29.9683 |
| 29.2246 | 29.0974 | 29.4531 | 29.1849 |
| 23.6759 | 22.3125 | nd      | 23.9383 |
| 25.5217 | 25.501  | 25.5311 | 25.832  |
| 22.4981 | 22.9458 | 23.5207 | 22.9931 |
| 24.9878 | 25.3334 | 25.3021 | 25.1293 |
| 22.2051 | nd      | 22.2929 | 23.0238 |
| 26.1598 | 26.3155 | 26.2931 | 26.517  |
| 22.8281 | 22.8138 | 22.3904 | 22.7116 |
| 23.1529 | nd      | 22.6609 | 21.5213 |
| 24.1578 | 23.8777 | 23.5204 | 23.2141 |
| 25.5339 | 26.35   | 26.1621 | 26.5654 |
| 21.0842 | 21.2171 | 21.5387 | 21.5194 |
| 24.6754 | 24.6846 | 24.737  | 25.1373 |
| 25.6251 | 25.6434 | 25.6701 | 25.9886 |
| 28.0216 | 27.6662 | 27.7661 | 27.7883 |
| 24.4629 | 24.2786 | 24.215  | 24.633  |

|         |         |         |         |
|---------|---------|---------|---------|
| 24.4539 | 24.0939 | 24.4234 | 24.8381 |
| 21.816  | 23.0869 | nd      | nd      |
| 22.346  | 23.4133 | 22.3472 | 21.6152 |
| 22.6702 | 23.1018 | 23.0718 | 22.5934 |
| 22.2377 | 22.5213 | 22.2226 | 22.3071 |
| 22.7352 | 22.159  | 23.196  | 23.8155 |
| 25.9581 | 26.0097 | 25.8561 | 25.6693 |
| 21.0866 | 21.6723 | 21.2032 | 21.8663 |
| 23.3516 | 22.0407 | 23.1589 | nd      |
| 25.5099 | 25.3919 | 25.2221 | 25.3278 |
| 23.172  | 23.0894 | 23.459  | 23.7001 |
| 23.8247 | 22.8731 | 23.5868 | 24.4133 |
| 29.9392 | 29.8752 | 29.922  | 30.0901 |
| 23.1966 | 23.3633 | 23.2959 | 23.6872 |
| 27.723  | 26.9226 | 26.9804 | 26.8059 |
| 27.3753 | 26.5455 | 26.8498 | 26.8819 |
| 26.1082 | 26.2127 | 26.072  | 26.1019 |
| 24.2879 | 25.2644 | 25.2543 | 25.3526 |
| 23.3834 | 23.8447 | 23.4746 | 24.1016 |
| nd      | nd      | 19.546  | 22.4433 |
| 21.2566 | 21.2256 | 20.983  | 21.1805 |
| 27.8463 | 27.391  | 27.6241 | 27.7846 |
| 21.7959 | 23.5822 | 22.8312 | nd      |
| 22.6759 | 22.5186 | 22.6629 | 22.7586 |
| 26.2165 | 25.9983 | 26.501  | 26.2135 |
| 24.1157 | 24.1976 | 23.7311 | 24.2266 |
| 26.2856 | 26.4266 | 26.5182 | 26.4413 |
| 22.2097 | nd      | nd      | nd      |
| 26.7935 | 26.8083 | 27.0977 | 27.5939 |
| 24.8954 | 24.9087 | 24.8795 | 25.2054 |
| 26.6188 | 25.9755 | 26.2259 | 26.1367 |
| 32.5679 | 32.5943 | 32.6758 | 32.5445 |
| 24.1791 | 24.3683 | 23.8631 | 24.2884 |
| 25.6149 | 25.7212 | 26.1004 | 25.9032 |
| 26.337  | 26.498  | 26.445  | 26.7193 |
| nd      | nd      | 22.2082 | 22.0098 |
| nd      | 21.2001 | nd      | 20.6515 |
| nd      | 20.4909 | 20.5227 | 20.4048 |
| 26.6561 | 26.5102 | 26.3132 | 26.5931 |
| 25.1442 | 25.1163 | 25.1607 | 25.4322 |
| 20.1657 | 20.8914 | 20.5173 | nd      |

|         |         |         |         |
|---------|---------|---------|---------|
| 26.8939 | 26.9525 | 26.8214 | 27.1179 |
| 24.0072 | 23.7466 | 23.969  | 23.8167 |
| 27.1511 | 26.9927 | 27.1376 | 27.2695 |
| 26.5611 | 26.9083 | 26.7016 | 26.9198 |
| 24.6624 | 24.7003 | 24.2694 | 25.1561 |
| 22.4795 | nd      | 22.2646 | 22.799  |
| 22.1408 | 22.2462 | 21.8502 | 21.6648 |
| 27.3404 | 27.2867 | 27.1884 | 27.4782 |
| 27.1345 | 27.2402 | 27.3139 | 27.2587 |
| 24.2314 | 24.0907 | 24.2351 | 23.8149 |
| 25.1462 | 24.7136 | 24.7846 | nd      |
| 21.9953 | 22.8633 | 22.4326 | 21.9068 |
| 27.0436 | 26.9439 | 26.9165 | 27.2728 |
| nd      | nd      | 28.2998 | 26.2792 |
| 22.6771 | 22.6439 | 22.7743 | 22.8036 |
| 28.7049 | 27.949  | 28.2814 | 28.2082 |
| 24.9517 | 24.6907 | 24.9225 | 24.8055 |
| 23.1342 | 23.1324 | 21.64   | 22.9701 |
| 26.4705 | 26.2005 | 26.2031 | 26.3616 |
| 24.8082 | 24.6057 | 24.3776 | 24.657  |
| 24.1953 | 24.5327 | 24.1983 | 24.2338 |
| 22.4038 | nd      | 21.387  | 22.5184 |
| 23.9468 | 23.9022 | 23.7377 | 23.8325 |
| 20.4103 | nd      | nd      | 20.676  |
| 26.931  | 26.7287 | 26.6315 | 27.1504 |
| 22.5519 | 22.8835 | 21.8574 | 22.0051 |
| 22.5991 | 22.2806 | 22.0616 | 22.4591 |
| 29.0315 | 28.2748 | 28.3979 | 28.4848 |
| 28.6259 | 27.8843 | 28.1105 | 27.754  |
| 28.177  | 27.1562 | 27.4386 | 27.4211 |
| 29.892  | 29.8725 | 29.7825 | 29.5982 |
| 23.2406 | 23.5739 | 22.7248 | 22.87   |
| 23.158  | 23.7281 | 24.134  | 24.769  |
| 23.9817 | 24.1502 | 24.2076 | 24.2009 |
| 23.667  | 23.5308 | 23.3794 | 23.752  |
| 25.7582 | 25.8041 | 25.5785 | 25.8907 |
| 22.5885 | 23.0281 | 22.7406 | 23.5014 |
| 23.1878 | 23.36   | 22.9352 | 23.0717 |
| 20.3385 | 20.3847 | 20.8854 | 20.2566 |
| 23.049  | 23.243  | 23.0976 | 23.2847 |
| nd      | 22.3089 | nd      | nd      |



|         |         |         |         |
|---------|---------|---------|---------|
| 26.907  | 26.9904 | 26.901  | 26.6539 |
| 26.4473 | 26.4996 | 26.4284 | 26.3815 |
| 26.3128 | 26.2535 | 26.3741 | 26.4374 |
| 23.214  | 23.9419 | 23.447  | 23.4238 |
| 28.6985 | 28.5432 | 28.3605 | 28.4529 |
| 24.1105 | 24.3135 | 23.6336 | 24.2559 |
| 22.2035 | 21.5211 | 21.8225 | 21.9415 |
| 29.0981 | 29.0751 | 29.0862 | 29.2849 |
| 26.6761 | 26.74   | 26.3989 | 26.895  |
| 29.3734 | 29.5871 | 29.4956 | 29.5895 |
| 29.8155 | 29.8162 | 29.7559 | 29.687  |
| 21.7801 | nd      | nd      | 21.4855 |
| 24.1922 | 24.3655 | 23.5317 | 23.915  |
| nd      | 22.0436 | 22.2284 | 22.0311 |
| 31.3905 | 31.1639 | 30.9543 | 30.9141 |
| 21.3971 | nd      | 22.198  | 21.0522 |
| 26.8528 | 26.4878 | 26.446  | 25.9825 |
| 28.3013 | 28.3478 | 28.0371 | 28.6371 |
| 25.8227 | 25.8419 | 25.6986 | 25.837  |
| 29.7022 | 29.8623 | 29.6777 | 29.8156 |
| 24.0846 | 24.2239 | 23.4502 | 22.9892 |
| 25.2965 | 25.3514 | 25.1794 | 25.0509 |
| 27.6501 | 27.5855 | 27.6136 | 27.6689 |
| 24.7852 | 25.0014 | 22.4478 | 25.0336 |
| 22.2201 | 21.6248 | 21.7854 | 21.6035 |
| nd      | 23.4399 | 23.2822 | 22.6602 |
| 25.2113 | 25.0073 | 25.3012 | 25.4363 |
| 26.1847 | 25.2895 | 25.6404 | 25.5569 |
| nd      | nd      | 20.412  | 20.3627 |
| 28.1961 | 27.5989 | 27.7567 | 28.0686 |
| 28.0547 | 27.5557 | 27.8488 | 27.805  |
| 24.2139 | 23.9017 | 24.1038 | 24.3871 |
| 24.9574 | 25.4097 | 25.4752 | 25.1226 |
| 24.3677 | 24.2639 | 24.3916 | 24.4684 |
| 21.445  | 21.5975 | 21.6039 | 21.5986 |
| 31.2047 | 31.1436 | 31.1167 | 31.422  |
| 26.5475 | 26.3517 | 26.5547 | 26.6741 |
| 25.7864 | 25.8643 | 26.0067 | 26.3202 |
| 21.6084 | 22.0646 | 21.5673 | 21.3354 |
| 27.5979 | 27.5486 | 27.3979 | 27.9529 |
| 29.8201 | 29.914  | 29.7483 | 29.8107 |

|         |         |         |         |
|---------|---------|---------|---------|
| 28.0113 | 28.3239 | 28.2272 | 27.9672 |
| 27.1518 | 27.1965 | 27.2796 | 26.9426 |
| 23.9362 | 23.5981 | 24.1701 | 24.1881 |
| 22.9074 | 22.8143 | 22.6677 | 22.479  |
| 22.8557 | 22.977  | 22.6858 | 23.3527 |
| 24.1755 | 24.5218 | 24.403  | 24.786  |
| 24.1129 | 24.6652 | 23.7407 | 24.0889 |
| 23.0145 | 23.3977 | 22.8765 | 22.844  |
| 27.4817 | 27.5097 | 27.6514 | 27.8269 |
| 31.9404 | 31.908  | 31.8891 | 31.8964 |
| nd      | 22.2032 | 22.0751 | 22.0356 |
| 28.3581 | 28.3051 | 28.4113 | 28.497  |
| 24.6688 | 24.2278 | 24.3711 | 23.9886 |
| 24.5038 | 24.7281 | 24.2884 | 24.4571 |
| 26.4991 | 26.3786 | 26.3039 | 26.5497 |
| 23.9336 | 23.98   | 24.1039 | 24.6169 |
| 25.0314 | 24.7148 | 24.6312 | 25.1935 |
| 24.369  | 24.0843 | 23.7136 | 24.4714 |
| 24.6746 | 23.8683 | 23.4608 | 24.1864 |
| 26.274  | 26.3572 | 26.3895 | 26.3808 |
| 23.1398 | nd      | 22.8672 | 22.4806 |
| 22.5963 | 22.7725 | nd      | 24.3623 |
| 23.394  | 23.5799 | 23.0342 | 23.693  |
| 23.5314 | 23.5252 | 23.698  | 23.9099 |
| 24.458  | 24.6071 | 24.082  | 23.452  |
| 24.1057 | 24.4912 | 24.3306 | 24.7042 |
| 27.722  | 27.5362 | 27.5685 | 27.8524 |
| 23.9592 | 24.3582 | 24.5382 | 24.3758 |
| 25.7209 | 25.4559 | 25.0414 | 25.4314 |
| 24.4271 | 25.4585 | 25.3981 | 25.8168 |
| 22.744  | 23.2724 | 22.8248 | 23.2876 |
| 24.1873 | 24.7267 | 24.489  | 24.3314 |
| 24.1238 | 23.0775 | 23.9415 | 23.9741 |
| 25.6223 | 25.6659 | 25.6862 | 25.5516 |
| 24.5741 | 24.5159 | 24.1834 | 24.564  |
| 27.2518 | 27.3915 | 27.1347 | 27.4294 |
| 24.3511 | 23.747  | 24.1445 | 24.403  |
| 23.9138 | 24.7078 | 23.4668 | 25.6471 |
| 30.5715 | 30.8765 | 30.9493 | 30.7591 |
| 25.0044 | 24.9904 | 24.7669 | 24.9562 |
| 23.7133 | 23.2784 | 23.575  | 23.7332 |

|         |         |         |         |
|---------|---------|---------|---------|
| 21.36   | 22.7678 | 22.6049 | 22.6994 |
| 25.5115 | 26.485  | 25.9759 | 25.8842 |
| 29.3575 | 29.4284 | 29.3296 | 29.3089 |
| 26.4929 | 26.4665 | 26.4606 | 26.2863 |
| 26.6694 | 26.6283 | 26.5183 | 26.678  |
| 27.562  | 27.1777 | 27.1822 | 26.9317 |
| 26.8598 | 26.827  | 27.0857 | 26.5861 |
| 29.8451 | 29.7546 | 29.8155 | 29.7579 |
| nd      | nd      | 21.4118 | 21.4804 |
| 27.0832 | 23.671  | 24.0013 | 24.2086 |
| 23.2014 | nd      | 23.4501 | nd      |
| 23.9982 | 23.2947 | 23.5627 | 23.6564 |
| 24.8111 | 25.3108 | 24.8242 | 24.946  |
| 21.1682 | 21.7093 | 21.1569 | 21.1716 |
| 27.0909 | 26.9614 | 27.2366 | 27.2919 |
| 29.1896 | 29.3129 | 29.2874 | 29.2121 |
| 23.4697 | 23.4454 | nd      | 23.0484 |
| 25.2447 | 25.0736 | 25.2577 | 25.7717 |
| 28.7892 | 28.7667 | 28.5844 | 28.844  |
| 25.3613 | 24.9809 | 24.883  | 25.2857 |
| 22.0545 | 21.9632 | 22.0836 | 22.8368 |
| 22.5529 | 22.4506 | 22.2581 | 22.5377 |
| 22.3843 | 22.9645 | 22.1297 | nd      |
| 22.906  | nd      | nd      | 22.5584 |
| 26.3281 | 26.4981 | 26.5109 | 26.4123 |
| 22.9836 | 22.4545 | 22.1398 | 22.2488 |
| 21.677  | nd      | nd      | nd      |
| 22.9086 | 22.6205 | 22.6241 | 22.8413 |
| nd      | 21.1314 | nd      | 21.1219 |
| 25.1616 | 25.542  | 24.7658 | 25.2478 |
| 24.7311 | 24.6102 | 24.6253 | 24.8009 |
| 23.6412 | 23.8012 | 23.7505 | 23.5986 |
| 24.6863 | 24.9361 | 24.7075 | 24.5045 |
| 25.374  | 25.4768 | 25.3778 | 25.7935 |
| 28.0595 | 28.007  | 27.9762 | 28.0151 |
| 28.8004 | 28.9217 | 28.7184 | 28.6762 |
| 26.5062 | 26.4026 | 26.498  | 26.409  |
| nd      | 23.7555 | 23.4751 | 23.861  |
| 30.2704 | 29.4137 | 29.9344 | 29.6879 |
| 28.7015 | 27.7493 | 28.1275 | 28.1511 |
| 26.7839 | 26.0339 | 26.4102 | 26.315  |

|         |         |         |         |
|---------|---------|---------|---------|
| 25.4594 | 25.4967 | 24.4717 | 25.8168 |
| nd      | nd      | 21.1414 | 20.9141 |
| 23.2223 | 23.5759 | 23.1814 | 23.6649 |
| 27.0686 | 27.0708 | 26.9353 | 27.1204 |
| 25.6181 | 25.5727 | 25.765  | 25.7337 |
| 25.5343 | 24.3669 | 25.0238 | 25.0551 |
| 28.3266 | 28.1876 | 28.2026 | 28.4285 |
| 22.7078 | 22.8526 | 22.9908 | 22.7032 |
| 26.0453 | 26.295  | 26.1531 | 26.1266 |
| 23.9955 | 23.2839 | 23.8822 | 23.5091 |
| nd      | 23.1893 | nd      | 23.3487 |
| 27.5089 | 27.6649 | 27.4597 | 27.3467 |
| 24.6224 | 24.8052 | 24.5588 | 24.1045 |
| 24.0743 | 24.1906 | 24.1009 | 23.9552 |
| 20.7682 | 20.8753 | 20.9546 | 21.1817 |
| 22.5964 | 22.906  | 22.8833 | 23.1485 |
| 22.2251 | nd      | 22.2186 | 20.9954 |
| 25.936  | 26.1777 | 26.0386 | 25.6452 |
| nd      | 22.0624 | 21.4195 | 21.2022 |
| 23.1881 | nd      | 22.7499 | 22.7979 |
| 25.0972 | 25.0401 | 24.904  | 25.0158 |
| 24.2528 | 24.835  | 24.4074 | 24.4601 |
| 30.1939 | 30.2712 | 29.9354 | 30.4903 |
| 25.6568 | 25.939  | 25.6616 | 25.7479 |
| 25.1638 | 24.9371 | 24.4982 | 25.6876 |
| 30.1552 | 30.124  | 30.1125 | 29.94   |
| 22.9981 | 23.7514 | 23.4919 | 23.773  |
| 23.2392 | 23.3178 | 23.1582 | 23.6012 |
| 26.1414 | 26.4947 | 26.5315 | 26.3386 |
| 32.5635 | 32.5703 | 32.4866 | 32.5146 |
| 33.2602 | 33.0903 | 33.2225 | 33.2699 |
| 24.8192 | 24.5832 | 24.6046 | 24.3808 |
| 22.3006 | 22.3854 | 21.9449 | 22.8329 |
| 22.3932 | nd      | 21.9062 | 21.4222 |
| nd      | 21.5236 | 21.2776 | 22.1486 |
| 23.3073 | 22.7508 | 23.8434 | nd      |
| 22.2682 | 22.116  | 21.6797 | 22.2184 |
| 22.1753 | 22.1667 | 22.0854 | 22.1737 |
| nd      | nd      | nd      | nd      |
| 29.4049 | 29.3618 | 29.3967 | 29.3693 |
| 23.4543 | 23.2608 | 23.4516 | 23.6434 |

|         |         |         |         |
|---------|---------|---------|---------|
| 21.9854 | 21.8317 | 22.6047 | 21.7876 |
| 28.6991 | 29.5412 | 29.5027 | 28.6789 |
| 29.4435 | 30.2897 | 30.2514 | 29.6259 |
| 22.5282 | 23.6415 | 22.7427 | 21.2566 |
| 29.8444 | 30.7778 | 30.5908 | 29.8182 |
| 22.3965 | 22.3177 | nd      | 22.2366 |
| 28.9627 | 28.0273 | 28.4379 | 28.2533 |
| 29.9639 | 29.7732 | 29.9011 | 29.7449 |
| 24.2816 | 23.7    | 24.3203 | 24.1289 |
| 25.6444 | 25.5631 | 25.8965 | 25.9311 |
| 26.466  | 26.5598 | 26.5921 | 26.4966 |
| 23.8038 | 23.6228 | 23.9508 | 23.8615 |
| 26.106  | 26.1313 | 25.8893 | 26.084  |
| 24.1135 | 23.8712 | 24.2628 | 24.7796 |
| 23.5246 | nd      | 22.4617 | 23.2145 |
| 24.3151 | 24.2481 | 24.2478 | 25.1449 |
| 23.4765 | 24.2012 | 23.9437 | 23.1063 |
| 26.7779 | 27.1097 | 26.8577 | 26.9014 |
| 34.8201 | 34.7976 | 34.8884 | 34.8034 |
| 27.525  | 27.4903 | 27.6474 | 27.7679 |
| 28.6866 | 28.6101 | 28.6787 | 28.5026 |
| 25.0899 | 24.9362 | 24.9843 | 24.8048 |
| 25.4377 | 25.2337 | 25.588  | 25.3806 |
| nd      | 22.4686 | nd      | 22.6393 |
| 27.0241 | 27.1254 | 26.9381 | 27.1279 |
| 30.5126 | 30.4848 | 30.2627 | 30.3743 |
| 24.17   | 24.6623 | 23.9846 | 24.1265 |
| 26.9389 | 26.8336 | 26.5096 | 26.5098 |
| 20.909  | 21.2798 | 20.8544 | 21.2118 |
| 31.5676 | 31.6785 | 31.8905 | 31.4719 |
| 23.2188 | 23.5013 | 23.0098 | 23.1812 |
| 23.4783 | nd      | 23.2731 | 23.2261 |
| 25.0036 | 26.2697 | 26.1071 | nd      |
| 23.4554 | 23.2167 | 23.5124 | 22.9929 |
| 27.2076 | 26.9143 | 27.03   | 27.2237 |
| 27.9966 | 27.8273 | 27.83   | 28.2917 |
| nd      | 22.9344 | 23.2406 | 23.4558 |
| 23.8114 | 23.7042 | 23.7283 | 23.6272 |
| 24.7919 | 24.2422 | 24.385  | 25.2234 |
| 23.1373 | 23.5364 | 23.539  | 23.7923 |
| 25.4938 | 25.5113 | 25.3219 | 25.4078 |

|         |         |         |         |
|---------|---------|---------|---------|
| nd      | nd      | nd      | 23.2054 |
| 26.3837 | 26.5808 | 26.2809 | 26.4472 |
| 21.6621 | 22.2439 | 22.1567 | 22.9831 |
| nd      | 21.2121 | 20.7553 | 21.0603 |
| 20.3206 | 21.1904 | 20.7868 | 21.3696 |
| 24.8966 | 25.3225 | 25.4274 | 25.5278 |
| 22.6574 | 23.228  | 22.5023 | 22.7263 |
| 23.5167 | 23.3749 | 23.0724 | 23.5736 |
| 27.9472 | 27.92   | 27.6718 | 27.882  |
| 32.3167 | 32.0361 | 32.0554 | 32.2224 |
| nd      | nd      | nd      | 23.1386 |
| 24.1429 | 24.4938 | 23.7721 | 24.2669 |
| 24.7283 | 24.2405 | 24.1342 | 24.1741 |
| 23.7879 | 23.6575 | 23.2696 | 23.2519 |
| 24.1735 | 25.0542 | 24.623  | 24.2008 |
| 28.1881 | 28.3403 | 28.4733 | 28.4961 |
| 21.5524 | 21.7706 | 22.1418 | 22.2416 |
| nd      | 22.7938 | 22.785  | 22.9751 |
| 24.3057 | 24.2897 | 24.495  | 24.4564 |
| 23.695  | 23.9013 | 23.6043 | 23.7703 |
| 27.103  | 27.3808 | 27.1758 | 27.2359 |
| 29.2132 | 29.1875 | 29.0764 | 29.336  |
| nd      | 20.932  | 21.171  | 21.0028 |
| 22.6722 | 22.8063 | nd      | 22.8976 |
| nd      | 22.1801 | 22.082  | nd      |
| 23.348  | 23.3109 | 23.4987 | 23.5566 |
| nd      | nd      | 23.6243 | nd      |
| 25.3972 | 25.461  | 25.3454 | 25.7166 |
| 27.6982 | 27.6818 | 27.6165 | 27.8195 |
| 25.7635 | 25.4568 | 25.3654 | 25.6704 |
| 25.5392 | 25.6973 | 25.4697 | 25.4634 |
| 25.249  | 25.1168 | 25.2526 | 24.8389 |
| 25.0378 | 25.0236 | 25.0703 | 25.0357 |
| 23.6426 | 23.9855 | 23.6281 | 23.5292 |
| 28.6645 | 28.6724 | 28.5525 | 28.8258 |
| 25.7081 | 25.485  | 25.127  | 25.391  |
| 23.5077 | 24.2224 | 23.9364 | 23.7744 |
| 23.2512 | nd      | 23.3619 | 23.8805 |
| 23.187  | 23.2811 | 22.9644 | 23.0451 |
| 24.32   | 24.9444 | 24.472  | 24.3194 |
| 23.3547 | nd      | 22.8397 | nd      |

|         |         |         |         |
|---------|---------|---------|---------|
| 25.9304 | 26.1269 | 26.0437 | 25.789  |
| 23.0733 | 23.0165 | 23.2288 | 23.2686 |
| 23.2487 | 23.3836 | 23.244  | 23.7381 |
| 28.0413 | 28.0895 | 28.0792 | 28.0954 |
| 22.9365 | 22.7015 | 22.8514 | 22.9431 |
| 25.2572 | 25.1515 | 25.4262 | 25.8107 |
| 25.9799 | 25.9744 | 26.0507 | 25.9613 |
| 25.9437 | 26.2579 | 26.1019 | 26.0187 |
| 26.4001 | 26.2086 | 26.4527 | 26.2157 |
| 27.5353 | 27.665  | 27.4782 | 27.8486 |
| 27.0787 | 26.9013 | 26.908  | 27.2876 |
| nd      | nd      | nd      | 23.4599 |
| 25.1514 | 24.7775 | 24.9271 | 25.0592 |
| 24.6291 | 24.3828 | 24.4204 | 24.9468 |
| nd      | 21.4036 | 22.3169 | 22.7288 |
| 21.8984 | 21.7193 | 21.2001 | 21.668  |
| nd      | 20.9243 | 22.7143 | 22.598  |
| 23.4443 | 23.1424 | 23.6714 | 23.3945 |
| nd      | 21.3727 | 21.7807 | nd      |
| 24.7218 | 24.6867 | 24.4789 | 24.7797 |
| 28.9919 | 28.9842 | 28.8062 | 28.8925 |
| 21.0559 | 22.5186 | 21.6627 | 20.8508 |
| 22.6417 | nd      | 22.2023 | 22.9432 |
| 26.178  | 26.225  | 26.1417 | 26.0161 |
| 28.1252 | 27.2664 | 27.5328 | 27.2712 |
| 26.5909 | 26.7887 | 26.6737 | 26.4912 |
| 28.8976 | 27.9287 | 28.1463 | 28.1098 |
| 30.0878 | 30.0931 | 30.0804 | 29.962  |
| 23.0224 | 22.9608 | nd      | 23.3924 |
| 22.0883 | 21.7898 | nd      | 23.0055 |
| 28.6865 | 28.6571 | 28.4822 | 28.3907 |
| 29.3554 | 29.0731 | 29.0547 | 29.2882 |
| 24.1263 | 24.075  | 23.8453 | 23.5329 |
| 23.1375 | 22.9212 | 23.2929 | 23.6413 |
| 23.3594 | 24.1743 | 24.1071 | 24.4374 |
| 27.2204 | 27.0454 | 27.1942 | 27.1099 |
| 24.8855 | 24.901  | 25.2424 | 25.3896 |
| nd      | 22.2161 | 22.6209 | nd      |
| 21.4371 | 22.303  | 22.2625 | nd      |
| 22.8405 | 22.9851 | 22.7425 | 22.958  |
| 30.2455 | 30.0103 | 30.3617 | 30.3562 |

|         |         |         |         |
|---------|---------|---------|---------|
| 24.0371 | 23.6903 | 24.1528 | 23.7528 |
| 25.2377 | 24.625  | 24.8045 | 25.2638 |
| 23.498  | 23.3514 | 23.845  | 23.4247 |
| 22.1291 | 23.1857 | 22.8546 | 22.9944 |
| 25.7829 | 25.6614 | 25.5264 | 25.8684 |
| 32.1637 | 32.1449 | 32.1623 | 32.1077 |
| 29.4424 | 29.3868 | 29.4095 | 29.0826 |
| 24.8125 | 24.5014 | 24.4672 | 24.2275 |
| 23.5107 | 23.7888 | 23.448  | 23.021  |
| 23.6394 | 23.7233 | 23.7684 | 23.5417 |
| 30.4901 | 30.3525 | 30.6295 | 30.8455 |
| 27.8572 | 27.7864 | 27.5826 | 27.649  |
| 23.1463 | 23.4983 | 23.5201 | 24.3677 |
| 26.2308 | 26.191  | 26.2056 | 26.0966 |
| 24.9423 | 25.2338 | 24.9707 | 25.375  |
| nd      | nd      | 23.4454 | 23.6287 |
| 27.64   | 27.6432 | 27.5513 | 27.3408 |
| 26.1556 | 26.1776 | 25.7815 | 25.6498 |
| 23.9659 | 24.2542 | 23.8519 | 23.9494 |
| 23.722  | 22.6411 | nd      | 23.5489 |
| 22.8414 | 22.2957 | 22.0476 | 22.2842 |
| 28.6319 | 28.6526 | 28.8393 | 29.0596 |
| 21.7582 | nd      | 20.7805 | 21.9202 |
| 25.5023 | 25.1331 | 25.61   | 25.8544 |
| 23.0867 | 23.0014 | 22.8339 | 23.2236 |
| 24.2272 | 23.8416 | 24.0231 | 23.7656 |
| 27.5805 | 27.5011 | 27.5085 | 27.5938 |
| 28.4978 | 28.5534 | 28.6071 | 28.8926 |
| 24.3968 | 24.1282 | 24.2898 | 23.9699 |
| 32.0985 | 32.3892 | 32.1371 | 32.0326 |
| 23.7221 | 23.9134 | 23.6201 | 24.3285 |
| 30.0116 | 29.1986 | 29.4822 | 29.3288 |
| 31.0879 | 30.2197 | 30.596  | 30.4192 |
| 30.1156 | 29.1199 | 29.5579 | 29.3002 |
| 23.1747 | 22.8264 | 22.9339 | 23.0811 |
| 22.2677 | 22.4411 | 22.9822 | 22.782  |
| 23.7524 | 24.0462 | 23.3187 | 23.3056 |
| nd      | 24.0706 | nd      | 24.6452 |
| 20.6147 | 21.1274 | 21.2782 | 21.1026 |
| 34.5688 | 34.4935 | 34.2697 | 34.4358 |
| 34.7548 | 34.6037 | 34.3721 | 34.6901 |



|         |         |         |         |
|---------|---------|---------|---------|
| 25.6312 | 25.3208 | 25.3853 | 26.4562 |
| 22.3811 | nd      | 21.615  | 21.7282 |
| 24.1376 | 23.8233 | 23.5467 | 24.2052 |
| 23.7911 | 23.3448 | 22.6093 | 23.2491 |
| nd      | 25.1135 | 24.6452 | 24.1351 |
| 25.4418 | 25.566  | 25.4803 | 24.517  |
| 24.6431 | 24.1776 | nd      | 24.2625 |
| 25.2903 | 24.9859 | 25.1652 | 25.2531 |
| 20.8096 | 21.2177 | 20.6585 | 20.9554 |
| 23.1409 | 23.0616 | 23.0814 | 23.1788 |
| nd      | nd      | nd      | 21.955  |
| 22.1369 | 21.594  | 21.7013 | 21.6113 |
| 27.0991 | 26.8053 | 26.8439 | 26.7439 |
| 25.665  | 24.9666 | 25.3895 | 25.481  |
| 21.4334 | 21.4217 | 21.6747 | 21.15   |
| 27.8149 | 27.7288 | 27.9479 | 27.913  |
| 25.0889 | 24.8013 | 24.7284 | 24.7526 |
| 24.8766 | 25.7047 | 24.8219 | 24.2855 |
| 26.978  | 25.1671 | 25.6448 | 26.4513 |
| 26.4573 | 25.762  | 26.1235 | 26.6608 |
| 29.6735 | 29.401  | 29.6772 | 30.1076 |
| 23.7613 | nd      | 24.3276 | 24.7483 |
| 28.8472 | 28.6092 | 28.9671 | 29.4442 |
| 24.5958 | 27.6422 | 24.694  | 23.5364 |
| 32.8171 | 32.4554 | 32.6888 | 33.293  |
| 29.8363 | 29.6336 | 29.8793 | 30.5156 |
| 32.0652 | 32.0209 | 32.1012 | 32.8149 |
| 32.9747 | 32.6765 | 32.5932 | 33.0644 |
| 23.6832 | 23.5478 | 23.9292 | 24.224  |
| 33.0384 | 33.4828 | 33.375  | 32.9039 |
| 27.9874 | 28.0026 | 27.8483 | 28.0057 |
| 25.9527 | 24.7878 | 25.0861 | 25.4823 |
| 23.0246 | 22.9373 | 22.6114 | 22.7944 |
| 29.5692 | 29.3869 | 29.6119 | 30.0049 |
| 25.3941 | 24.6594 | nd      | 25.2554 |
| 23.713  | 23.1699 | 23.6995 | 23.4107 |
| 22.7578 | 23.1616 | 22.7623 | 23.1135 |
| 22.5438 | 22.616  | 22.4526 | 22.7758 |
| nd      | nd      | 22.6874 | 23.7693 |
| 23.437  | nd      | 23.2654 | 23.6402 |
| 22.053  | 21.9206 | nd      | 22.1903 |

|         |         |         |         |
|---------|---------|---------|---------|
| 25.1777 | 24.7983 | 25.1104 | 25.2617 |
| 28.0303 | 27.7877 | 27.8302 | 28.3404 |
| 28.1995 | 27.8999 | 28.0631 | 28.5681 |
| 26.5086 | 26.4574 | 26.5403 | 26.8028 |
| 24.7004 | 24.8292 | 24.9052 | 25.064  |
| 27.0642 | 27.0877 | 27.1499 | 27.5513 |
| 22.7147 | 22.7835 | 22.8083 | 23.2938 |
| 25.7766 | 25.2445 | 25.6427 | 25.3051 |
| 26.6418 | 26.3898 | 26.6584 | 27.0649 |
| 23.919  | 24.0245 | 23.6664 | 24.3755 |
| 28.8537 | 28.7832 | 28.7515 | 29.1249 |
| 27.644  | 27.3753 | 27.3777 | 27.6349 |
| 23.0853 | 23.3973 | 22.7    | 22.7569 |
| 27.2094 | 27.2449 | 27.1786 | 27.4051 |
| 28.6929 | 28.819  | 28.8288 | 29.0277 |
| 24.8139 | nd      | 24.8379 | nd      |
| 25.0676 | 25.0383 | 24.7605 | 25.0415 |
| nd      | nd      | 22.0973 | 22.6394 |
| 21.3812 | 21.2032 | 21.2771 | 21.5083 |
| 23.5176 | 22.156  | 22.95   | nd      |
| 27.9573 | 27.7924 | 27.7965 | 28.0562 |
| 24.4591 | 23.2904 | 23.4091 | 23.416  |
| 24.3097 | 24.4675 | 24.1142 | 23.7283 |
| 28.2854 | 28.2074 | 28.0461 | 28.1114 |
| 25.2542 | 24.2921 | 25.2258 | 24.8618 |
| nd      | nd      | 24.2735 | nd      |
| 22.1866 | nd      | 22.1639 | 22.7507 |
| 28.2423 | 27.9999 | 27.8693 | 28.0308 |
| 25.8938 | 25.9518 | 25.8143 | 25.5129 |
| 26.0197 | 25.8193 | 25.7862 | 26.1224 |
| nd      | 22.0453 | 22.0254 | 22.4871 |
| 23.2691 | nd      | 22.5673 | 21.1023 |
| 28.1606 | 28.1645 | 28.1931 | 28.4226 |
| 29.9615 | 30.0093 | 29.8831 | 30.2235 |
| 29.4437 | 29.2941 | 29.4872 | 29.8245 |
| 23.6022 | 24.5115 | 23.9675 | 24.3036 |
| 25.8183 | 25.5975 | 25.7315 | 26.1563 |
| 29.1637 | 29.2685 | 29.1926 | 29.1524 |
| 24.75   | 24.8471 | 24.9477 | 24.9221 |
| 27.3488 | 27.219  | 27.2497 | 27.7561 |
| 27.6206 | 27.7807 | 27.676  | 27.849  |

|         |         |         |         |
|---------|---------|---------|---------|
| 23.8595 | 23.6929 | 23.5902 | 24.3946 |
| 29.5679 | 29.4129 | 29.5575 | 29.984  |
| 31.0012 | 30.9815 | 30.9521 | 31.1557 |
| 28.0354 | 27.4455 | 27.6628 | 27.8972 |
| 29.9553 | 29.9817 | 30.1092 | 29.7934 |
| 26.9183 | 26.9608 | 26.8768 | 26.6854 |
| 25.0726 | 24.9596 | 25.3336 | 25.0388 |
| 24.4864 | 24.4258 | 24.4065 | 24.1956 |
| 29.9167 | 29.5369 | 29.799  | 29.8245 |
| 27.9889 | 27.7964 | 27.8919 | 28.0178 |
| 33.5677 | 33.5532 | 33.5794 | 33.428  |
| 25.0063 | 25.0841 | 24.9233 | 24.6858 |
| 26.9789 | 27.4339 | 27.4298 | 26.9155 |
| 23.9536 | 24.3806 | 24.032  | 23.8353 |
| 26.4649 | 26.4646 | 26.5464 | 26.698  |
| 22.877  | 22.5922 | 22.2827 | 22.3338 |
| 21.9642 | nd      | 22.2137 | 22.5771 |
| 26.4694 | 26.4716 | 26.1966 | 26.3994 |
| 24.0223 | 23.8963 | 23.8293 | 24.0874 |
| nd      | nd      | 22.998  | 22.6526 |
| nd      | nd      | 22.1626 | 22.8176 |
| 23.4414 | nd      | 22.465  | 22.6433 |
| 27.5182 | 27.6202 | 27.3116 | 27.4761 |
| 29.774  | 29.3885 | 29.4776 | 29.2522 |
| 29.822  | 28.7562 | 29.251  | 29.1291 |
| 27.6172 | 26.4413 | 26.9932 | 26.6349 |
| 21.6811 | 20.8884 | 22.5762 | 22.0484 |
| 22.1099 | 22.2669 | 21.8008 | 22.1694 |
| 21.5976 | 21.4066 | 20.7126 | 21.2329 |
| 24.1919 | 24.24   | 24.058  | 23.6918 |
| 27.8941 | 27.9454 | 28.1123 | 27.523  |
| 25.5228 | 25.7755 | 25.9277 | 25.9684 |
| nd      | nd      | 22.7105 | 22.6222 |
| 27.556  | 27.4874 | 27.8737 | 28.1841 |
| 25.7241 | 26.5956 | 26.2257 | 26.2604 |
| 22.646  | 22.6767 | 22.8215 | 22.6991 |
| 21.9177 | 21.6317 | 21.6839 | 21.7656 |
| 20.7804 | 21.8532 | 21.7331 | 21.9469 |
| 24.3889 | 24.283  | 24.2246 | 24.4489 |
| 22.7483 | 22.7547 | 23.4909 | 23.3664 |
| 29.4498 | 29.382  | 29.3011 | 29.3806 |

|         |         |         |         |
|---------|---------|---------|---------|
| 21.6    | 22.6848 | nd      | 22.4004 |
| 28.1791 | 27.531  | 27.746  | 27.8617 |
| 25.375  | 25.2588 | 25.3191 | 25.3753 |
| 23.7155 | 23.6934 | 23.6687 | 23.6582 |
| 26.0058 | 26.715  | 26.7396 | 27.0552 |
| 24.2967 | 24.6998 | 24.673  | 24.6219 |
| 22.8303 | 23.5585 | 23.5158 | 23.3865 |
| nd      | 20.5307 | 20.6931 | 21.114  |
| 23.0551 | 22.8263 | 21.5923 | 21.1712 |
| 25.506  | 25.9259 | 25.3637 | 25.8671 |
| 25.065  | 24.2217 | 24.4397 | 24.5439 |
| 21.4075 | nd      | 22.6987 | 22.3655 |
| 29.1369 | 29.1482 | 29.2456 | 29.2236 |
| 27.0546 | 27.0021 | 26.9855 | 27.0411 |
| 23.3418 | 22.3876 | 22.1374 | 23.5829 |
| 27.7112 | 27.9138 | 26.9906 | 27.2489 |
| 22.2707 | 21.6174 | 22.7617 | 23.4721 |
| 27.2677 | 27.3059 | 27.0792 | 27.0401 |
| 23.175  | nd      | 22.2409 | 22.9839 |
| nd      | 22.262  | nd      | nd      |
| 23.5527 | 23.0839 | 23.6348 | 23.713  |
| 23.4564 | 24.2976 | 24.2777 | 22.066  |
| 26.0584 | 26.2861 | 26.0755 | 25.9653 |
| 25.9456 | 25.8353 | 25.9898 | 25.8953 |
| nd      | nd      | 22.1273 | 22.5041 |
| 30.4423 | 30.4356 | 30.15   | 30.0887 |
| 25.6487 | 26.1012 | 25.8004 | 25.5048 |
| 27.5951 | 27.6098 | 27.4577 | 27.3621 |
| 30.6396 | 30.5821 | 30.7437 | 30.681  |
| 25.1509 | 25.3002 | 25.2138 | 24.9775 |
| 25.7713 | 26.4193 | 26.0396 | 25.9675 |
| 26.7523 | 26.9729 | 26.8107 | 26.6623 |
| 26.2533 | 26.4992 | 26.3899 | 25.8031 |
| 24.7878 | 25.4306 | 25.3501 | 24.5554 |
| 25.4013 | 25.4976 | 25.4503 | 25.0243 |
| 21.4584 | 21.7413 | 21.8003 | 21.1134 |
| 24.8689 | 24.1049 | 24.2165 | 24.7503 |
| 26.8662 | 26.6619 | 26.4991 | 26.3802 |
| 22.9404 | 23.0807 | 23.0046 | 22.8601 |
| 26.8059 | 26.7604 | 26.9908 | 26.8357 |
| 22.7797 | 23.108  | 23.6383 | 22.7958 |

|         |         |         |         |
|---------|---------|---------|---------|
| 23.9333 | 24.3429 | 23.938  | 23.6075 |
| 21.7233 | 23.8902 | 23.8957 | 23.6995 |
| 27.4931 | 27.4062 | 27.4077 | 27.3174 |
| 24.7812 | 24.8914 | 24.5609 | 24.383  |
| 25.2105 | 25.068  | 24.886  | 25.2786 |
| 23.4913 | nd      | 23.2795 | 23.4891 |
| 26.1907 | 26.607  | 26.4245 | 26.2725 |
| 25.1238 | 25.2002 | 25.2099 | 25.0494 |
| 23.5493 | 23.6544 | 23.56   | 23.3762 |
| 22.6046 | 23.3592 | nd      | 23.3716 |
| 24.2394 | 23.8333 | 24.1756 | 24.2087 |
| 25.2264 | 25.2985 | 25.4128 | 25.7096 |
| 22.5488 | nd      | nd      | 22.9294 |
| 22.9548 | 22.9486 | 22.7002 | 23.6748 |
| 21.7191 | 22.3967 | 22.1855 | 21.9202 |
| 24.257  | 24.2354 | 24.2869 | 23.3088 |
| 25.0754 | 25.4635 | 25.1072 | 25.016  |
| 24.4187 | 24.7206 | 24.1779 | 24.0523 |
| 21.2231 | nd      | 21.7606 | 27.5743 |
| 24.7493 | 23.6924 | 24.3692 | 24.5239 |
| 26.8986 | 27.1307 | 26.7976 | 27.021  |
| 25.103  | 25.4257 | 25.0585 | 25.3878 |
| 24.6598 | 25.0048 | 24.705  | 24.89   |
| 28.253  | 28.4418 | 28.3896 | 28.3491 |
| 24.5262 | 24.2441 | 24.4976 | 24.3675 |
| nd      | 25.511  | 25.2728 | 24.4964 |
| nd      | 29.7873 | 29.9519 | 29.5755 |
| nd      | 25.5476 | 25.3842 | 25.3035 |
| nd      | 23.4234 | 23.7345 | 23.1351 |
| nd      | 25.8644 | 26.6371 | 25.789  |
| nd      | 25.6431 | 25.8736 | 25.3619 |
| nd      | 25.5242 | 25.7345 | 24.6321 |
| nd      | 24.6818 | 25.4862 | 24.4361 |
| nd      | 23.1592 | 23.2264 | 23.9252 |
| nd      | 29.1801 | 29.1444 | 29.788  |
| nd      | 25.2524 | 25.0898 | 25.2543 |
| 21.8559 | 21.8498 | 21.1346 | 21.4168 |
| 22.6847 | 22.8088 | 22.6124 | nd      |
| 22.9298 | 22.329  | 22.7438 | 22.8762 |
| 25.6885 | 26.3389 | 26.0609 | 26.03   |
| 28.3283 | 28.4668 | 28.6018 | 28.4956 |

|         |         |         |         |
|---------|---------|---------|---------|
| 29.7553 | 29.9086 | 30.0496 | 29.9408 |
| 24.1914 | 24.7871 | 24.7225 | 25.8772 |
| 30.7182 | 30.759  | 30.9421 | 30.7259 |
| 29.787  | 29.8159 | 30.0712 | 29.8843 |
| 22.9099 | 23.1784 | 23.1984 | nd      |
| 24.933  | 24.7723 | 24.5671 | 24.9453 |
| 22.0822 | 22.9779 | 22.5374 | 23.2426 |
| 23.0736 | 22.6065 | 23.2242 | 22.9847 |
| 22.8161 | 23.4571 | 23.0521 | 22.8417 |
| 25.528  | 25.1619 | 25.1081 | 25.201  |
| 21.3822 | nd      | nd      | 21.0407 |
| 24.3707 | 24.4957 | 24.4932 | 24.4207 |
| 24.785  | 25.18   | 25.2593 | 25.651  |
| 28.0189 | 28.1619 | 27.8512 | 27.6759 |
| 29.8396 | 29.5915 | 29.4343 | 29.4098 |
| 27.571  | 27.4314 | 27.3534 | 27.1588 |
| 23.5101 | 23.0545 | nd      | 23.6577 |
| 24.1108 | 23.627  | 24.1955 | 24.554  |
| 21.6532 | 21.3133 | 21.7702 | 21.2982 |
| 26.3184 | 25.7099 | 25.725  | 25.7659 |
| 25.0859 | 22.9276 | 24.079  | 23.0486 |
| 31.5467 | 31.5731 | 31.6875 | 31.844  |
| 25.1244 | 24.3491 | 25.7662 | 25.513  |
| 21.9873 | 21.0211 | 22.3388 | 22.7395 |
| 22.9528 | 23.4054 | 23.6905 | 23.6594 |
| 27.0993 | 26.9753 | 27.2233 | 27.1657 |
| 24.2041 | 24.4432 | 23.7758 | 23.7116 |
| 27.3359 | 27.3664 | 27.3167 | 27.3384 |
| 26.616  | 26.4795 | 26.5554 | 26.7539 |
| 22.3858 | 21.9269 | 22.195  | 22.5683 |
| 26.1502 | 26.2518 | 26.0162 | 25.9751 |
| 25.634  | 25.3052 | 25.1906 | 26.0322 |
| 24.1183 | 23.265  | 24.2081 | 24.2447 |
| 28.8746 | 28.644  | 28.9583 | 28.6829 |
| nd      | 23.5623 | 23.6994 | 23.7195 |
| 31.3315 | 31.1479 | 31.3372 | 31.4552 |
| 28.0205 | 27.874  | 28.1208 | 28.4187 |
| 25.8187 | 25.7258 | 25.8145 | 25.8388 |
| 28.5285 | 28.4155 | 28.4221 | 28.4236 |
| 24.876  | 24.8499 | 24.6673 | 24.3276 |
| 25.7355 | 25.6939 | 25.4457 | 25.548  |

|         |         |         |         |
|---------|---------|---------|---------|
| 27.4038 | 27.2804 | 27.1848 | 27.0316 |
| 30.1477 | 30.2094 | 30.1507 | 29.9773 |
| 22.9447 | 23.2954 | 23.0049 | 22.2637 |
| nd      | 21.9698 | 21.3382 | 21.5839 |
| 31.1027 | 30.9491 | 31.1977 | 30.9835 |
| 28.2356 | 28.2475 | 28.0959 | 28.1622 |
| 24.6415 | 24.8173 | 24.2864 | 24.8084 |
| 26.5255 | 26.3069 | 26.4313 | 26.1792 |
| 28.2516 | 28.668  | 27.7963 | 27.782  |
| 22.1739 | 22.1126 | 23.0407 | 22.4785 |
| 24.8607 | 24.7294 | 24.9958 | 24.5316 |
| nd      | nd      | nd      | 24.1426 |
| 26.5055 | 26.5342 | 26.4018 | 26.7701 |
| 25.2222 | 25.2582 | 25.2957 | 24.789  |
| 22.9843 | 21.9449 | nd      | 22.4723 |
| 22.3096 | 21.1599 | 22.4438 | 22.0699 |
| 23.6503 | 23.4017 | nd      | 24.7315 |
| 27.2732 | 27.2936 | 27.2023 | 27.5019 |
| 28.9489 | 28.708  | 28.7234 | 28.8449 |
| 23.0947 | 23.0841 | 23.3772 | 23.414  |
| 23.6956 | 24.3047 | 24.0887 | 23.7526 |
| 30.7671 | 30.7677 | 31.04   | 30.8104 |
| nd      | 21.9404 | 21.89   | 22.6882 |
| 22.4755 | 23.038  | 23.1672 | 23.6342 |
| 32.5909 | 32.6764 | 32.6723 | 32.6517 |
| 25.6054 | 25.1128 | 25.6835 | 25.5002 |
| 23.8472 | 23.502  | 23.3437 | 24.0201 |
| 24.7205 | 23.9171 | 24.3216 | 24.2454 |
| 26.7992 | 26.6672 | 26.7033 | 26.1737 |
| 25.3282 | 25.2245 | 24.913  | 24.8672 |
| 21.2887 | nd      | 20.9849 | nd      |
| 22.8647 | 23.933  | 24.3264 | 24.6011 |
| 24.2425 | 25.3385 | 25.1248 | 24.4538 |
| 25.8837 | 25.8245 | 25.5839 | 25.8543 |
| 23.6734 | 24.1033 | 24.0282 | 23.8244 |
| 24.832  | 24.9991 | 24.9597 | 24.9358 |
| 23.536  | 24.781  | 24.2875 | 23.8782 |
| 26.8311 | 26.9824 | 26.8427 | 26.8284 |
| 23.7628 | 25.92   | 24.9895 | 25.5843 |
| 27.8292 | 28.1643 | 27.7932 | 27.9763 |
| 24.2364 | 24.0552 | 23.6278 | 23.8336 |

|         |         |         |         |
|---------|---------|---------|---------|
| 24.68   | 24.9933 | 24.5339 | 25.0039 |
| 23.0184 | 23.4836 | 22.7547 | 22.6264 |
| 24.9614 | 24.8191 | 25.0203 | 24.9251 |
| 21.9437 | 22.0083 | nd      | 21.2316 |
| nd      | nd      | 22.8807 | 22.6063 |
| 23.8845 | 23.7083 | nd      | 23.9814 |
| 26.2978 | 26.5833 | 26.6242 | 26.714  |
| nd      | nd      | nd      | nd      |
| 23.6839 | 23.5279 | 23.7632 | 23.2795 |
| 25.2419 | 25.9943 | 26.3501 | 26.0246 |
| 22.0737 | 21.8993 | 21.8875 | 21.9431 |
| 24.1353 | 24.5754 | 24.5271 | 24.4138 |
| 25.2685 | 25.2237 | 25.0848 | 25.058  |
| 23.7067 | 24.2792 | 23.8167 | 23.9515 |
| 23.1721 | 23.1726 | 22.7153 | 22.6592 |
| 22.8608 | 22.4398 | nd      | nd      |
| nd      | nd      | nd      | 22.9118 |
| 22.9869 | 22.7372 | 21.2079 | 21.964  |
| 27.0221 | 26.9167 | 26.8389 | 26.9788 |
| 24.9075 | 24.928  | 24.4228 | 24.8197 |
| 26.1314 | 24.1585 | 24.3138 | 25.4171 |
| 21.4966 | nd      | nd      | 22.1148 |
| 23.5827 | 23.8342 | 24.2628 | 24.0202 |
| 21.6088 | 21.3944 | 21.2074 | 21.0272 |
| 24.5738 | 24.8746 | 25.2426 | 25.0629 |
| 21.4822 | 21.6993 | 21.6484 | 22.0455 |
| 14.8393 | nd      | nd      | 15.9075 |
| 28.3333 | 28.3446 | 28.4333 | 28.4617 |
| 25.431  | 25.1541 | 25.1509 | 25.4282 |
| 25.2296 | 25.5331 | 25.2463 | 25.4115 |
| 23.1603 | 22.616  | 23.21   | 22.9345 |
| 23.5745 | 23.6681 | nd      | 23.7091 |
| 21.9784 | 22.5942 | 22.4804 | 22.9396 |
| 27.4443 | 27.4005 | 27.4293 | 28.5677 |
| 23.9097 | 24.2863 | 23.59   | 23.5053 |
| 28.4862 | 28.7127 | 28.5006 | 28.9749 |
| 30.219  | 29.662  | 29.9553 | 29.9418 |
| 23.6308 | nd      | 23.6797 | 23.2973 |
| 27.2584 | 27.5673 | 27.3766 | 27.6657 |
| 25.5759 | 25.3989 | 25.3939 | 25.5911 |
| 26.3102 | 25.1538 | 25.427  | 25.216  |



|         |         |         |         |
|---------|---------|---------|---------|
| nd      | 22.8937 | 23.076  | nd      |
| 23.0215 | 22.3156 | 22.539  | 22.5686 |
| 22.6512 | 23.0146 | 22.5653 | nd      |
| 25.4361 | 25.577  | 25.8725 | 26.0706 |
| 31.5009 | 31.5311 | 31.0295 | 30.7291 |
| 26.8116 | 26.7899 | 26.8947 | 26.9448 |
| 29.3279 | 29.5664 | 29.7033 | 29.3774 |
| 22.4619 | 22.3717 | 22.6582 | 22.7399 |
| 25.7808 | 25.48   | 25.5568 | 25.5567 |
| 24.128  | 24.1838 | 24.4946 | 24.5069 |
| 24.3067 | 24.7785 | 25.004  | 25.269  |
| 21.645  | 23.3566 | 22.2795 | 21.9021 |
| 24.3496 | 24.3881 | 24.3155 | 23.5432 |
| 24.4645 | nd      | 24.4953 | 24.1738 |
| 23.1834 | nd      | nd      | 21.4198 |
| 27.9871 | 27.9311 | 27.8823 | 28.1943 |
| 24.9172 | 24.162  | 24.4124 | 24.9158 |
| 22.9623 | 22.8936 | 22.8949 | 22.8296 |
| 21.969  | 21.1035 | 21.1513 | nd      |
| 20.6176 | 20.4114 | 20.1747 | 20.1325 |
| 21.7702 | 21.5841 | 21.3064 | 21.594  |
| nd      | 24.099  | 24.3629 | 24.7198 |
| 23.0795 | 22.5725 | 22.6208 | 22.9992 |
| 24.7038 | 24.7139 | 24.614  | 25.098  |
| 25.1956 | 25.0964 | 25.3631 | 24.8024 |
| 26.5497 | 26.0032 | 26.1555 | 26.1497 |
| 23.5557 | 23.8304 | 23.1797 | 23.7212 |
| 22.4375 | 22.7585 | 22.6872 | 22.727  |
| nd      | 23.5892 | 23.9433 | 24.4299 |
| 26.1081 | 25.6136 | 25.9885 | 26.169  |
| 22.8016 | 23.2351 | 22.751  | 23.0824 |
| 23.461  | 25.1416 | 23.5268 | 23.8133 |
| 23.4859 | nd      | 24.1315 | 23.6899 |
| 22.7818 | 22.6609 | 22.4464 | 22.5127 |
| 24.9898 | 24.3467 | 25.3789 | 24.8997 |
| 24.4667 | 24.4469 | 24.106  | 23.9537 |
| 30.1241 | 30.1155 | 30.2073 | 30.2456 |
| nd      | 23.2494 | 23.4977 | 23.2096 |
| 25.5914 | 25.2601 | 25.306  | 25.4531 |
| 25.9379 | 26.161  | 26.3667 | 26.244  |
| 24.8473 | 24.5847 | 24.8663 | 25.2012 |

|         |         |         |         |
|---------|---------|---------|---------|
| 25.9797 | 25.9035 | 26.1105 | 26.1656 |
| 27.4731 | 27.3019 | 27.4067 | 27.512  |
| 29.4639 | 28.2119 | 28.7997 | 28.7943 |
| 23.3568 | 23.3332 | 23.082  | 23.5926 |
| 25.6092 | 25.1251 | 25.1483 | 25.2855 |
| 21.8484 | 23.8068 | 23.3348 | 22.441  |
| 22.8234 | 22.2516 | 21.6251 | 21.9356 |
| 23.149  | 23.2503 | 22.1813 | 21.7135 |
| nd      | 22.4249 | nd      | 21.9403 |
| 27.4066 | 27.191  | 27.3273 | 27.0928 |
| 23.0481 | nd      | 22.2869 | 21.5437 |
| 24.6124 | 24.2281 | 24.7534 | 24.3253 |
| 28.8046 | 28.6541 | 28.7972 | 28.4523 |
| 22.2624 | 22.7099 | 22.8697 | nd      |
| 24.0511 | 23.6101 | 23.2736 | 23.8521 |
| 26.937  | 27.1345 | 26.9919 | 27.0501 |
| 24.5032 | 24.8221 | 24.2484 | 24.2266 |
| 25.2434 | 25.3024 | 25.399  | 25.4346 |
| 22.0222 | 22.1648 | 22.3237 | 22.6631 |
| 21.3008 | 21.6197 | 21.1127 | 20.6865 |
| nd      | nd      | nd      | 23.1664 |
| 30.0624 | 30.0675 | 30.1278 | 30.2389 |
| 34.5027 | 34.3513 | 34.5228 | 34.5294 |
| 23.0904 | 23.3669 | 23.1395 | 23.2696 |
| 26.578  | 26.4498 | 26.3729 | 27.0796 |
| 32.214  | 22.8417 | 21.9505 | 26.0632 |
| 28.8495 | 28.9375 | 29.0224 | 29.1384 |
| 29.5559 | 26.068  | 26.6384 | 26.8908 |
| 27.2054 | 27.1721 | 27.3289 | 27.3415 |
| 31.9767 | 31.9316 | 32.0877 | 31.8925 |
| 25.7698 | 25.3569 | 25.7753 | 26.1456 |
| 30.7626 | 30.5068 | 30.4843 | 30.6733 |
| 30.314  | 30.2823 | 30.2359 | 30.3041 |
| nd      | 22.8158 | 21.5796 | nd      |
| nd      | 23.8541 | 22.4814 | 22.8938 |
| 30.2222 | 30.2716 | 30.1484 | 30.1342 |
| 25.4996 | 25.4434 | 25.4388 | 25.038  |
| 21.6822 | 21.9984 | 22.0238 | 21.4212 |
| 27.5131 | 27.3997 | 27.3434 | 27.4015 |
| 22.6036 | 24.0202 | 24.2993 | 23.3836 |
| 20.5816 | nd      | 21.2827 | 20.7191 |

|         |         |         |         |
|---------|---------|---------|---------|
| 27.9146 | 28.118  | 28.3722 | 28.4815 |
| 25.0349 | 25.5481 | 24.8373 | 24.2286 |
| 25.7408 | 25.6821 | 26.1573 | 23.7217 |
| 22.9823 | 22.9588 | 22.5887 | 23.3332 |
| 23.1488 | 22.1771 | nd      | 22.5092 |
| 24.721  | 24.4833 | 24.2439 | 24.6014 |
| nd      | 22.814  | nd      | 22.3459 |
| 21.6774 | 21.5135 | nd      | 22.5874 |
| 24.7805 | 24.7316 | 24.9271 | 24.7901 |
| 24.1425 | 24.3196 | 24.7262 | 24.3614 |
| nd      | 22.1035 | 21.6753 | 22.4465 |
| 24.4536 | 24.6334 | 24.4875 | 24.7295 |
| 25.2575 | 25.0522 | 24.5894 | 24.8661 |
| 25.7367 | 25.7704 | 25.6996 | 25.7457 |
| 25.1583 | 25.2236 | 25.0846 | 24.9213 |
| 24.5267 | 24.5593 | 24.1782 | 24.8735 |
| nd      | nd      | 22.6602 | nd      |
| 22.7702 | 23.7075 | 23.2774 | 23.8559 |
| 23.7169 | 24.1158 | 23.6022 | 23.8685 |
| 22.6053 | 22.631  | nd      | nd      |
| 26.0175 | 26.0075 | 25.7699 | 25.2681 |
| 23.6281 | nd      | 24.1492 | 24.0967 |
| 24.9149 | 25.0241 | 24.8571 | 25.0673 |
| 27.1086 | 26.9749 | 27.2214 | 27.4192 |
| 22.9253 | 22.6733 | 21.5962 | 22.7899 |
| 25.6636 | 25.5741 | 25.2684 | 25.5317 |
| 27.434  | 27.2855 | 27.2591 | 27.2744 |
| 22.31   | nd      | 21.4386 | 22.415  |
| 27.1232 | 26.6115 | 26.6679 | 26.6767 |
| 23.9331 | 23.4046 | 22.5523 | 23.0601 |
| 25.3228 | 24.5627 | 25.1098 | 24.9961 |
| 25.3168 | 24.5979 | 24.7201 | 24.742  |
| 23.0034 | 22.0875 | 22.3711 | 22.5521 |
| 24.4347 | 23.6816 | 23.7943 | 24.1431 |
| 27.0232 | 26.066  | 26.3268 | 26.5931 |
| 24.096  | 23.3826 | nd      | nd      |
| 25.379  | 24.787  | 25.1033 | 24.8697 |
| 26.511  | 25.1973 | 26.0876 | 26.3393 |
| 26.5808 | 26.2787 | 26.1239 | 26.1298 |
| nd      | 21.8392 | nd      | 22.0858 |
| 20.724  | 20.2119 | 20.8317 | 20.8623 |

|         |         |         |         |
|---------|---------|---------|---------|
| 25.9602 | 25.3183 | 25.383  | 25.4715 |
| 25.6205 | 24.6243 | 25.1899 | 24.9441 |
| 24.205  | 23.332  | 23.932  | 23.8613 |
| 25.2769 | 24.5034 | 24.9237 | 24.9561 |
| 24.0817 | 22.3841 | 23.2998 | 22.9885 |
| 23.5212 | 22.6982 | nd      | 22.419  |
| 23.9879 | 22.9229 | nd      | 23.7822 |
| 25.2052 | 24.4194 | 24.3838 | 24.7882 |
| 25.411  | 24.7387 | 24.7521 | 24.7634 |
| 27.5873 | 26.8903 | 27.1285 | 27.1386 |
| 27.0264 | 26.438  | 26.5406 | 26.3711 |
| 25.9889 | 25.4408 | 25.9036 | 25.5266 |
| 24.7844 | 24.1045 | 24.2123 | nd      |
| 25.4103 | nd      | 25.1019 | 25.312  |
| 24.4519 | nd      | nd      | 24.122  |
| 24.9841 | 24.4202 | 24.4264 | 24.7004 |
| 25.7866 | 24.9352 | 25.2928 | 25.551  |
| 27.1918 | 26.257  | 26.5578 | 26.7157 |
| 24.8925 | 24.0483 | 24.718  | 24.7409 |
| nd      | 20.9912 | 21.126  | nd      |
| 23.9242 | 23.7081 | 23.2821 | nd      |
| 26.9955 | 26.7398 | 26.7012 | 26.962  |
| 25.3088 | 26.0666 | 25.3551 | 24.5336 |
| nd      | nd      | nd      | 18.7228 |
| 26.8056 | 26.8994 | 27.0408 | 27.4113 |
| 23.7752 | 23.814  | 23.4765 | 23.0406 |
| 22.8508 | 22.9009 | 23.021  | 22.7333 |
| 22.6907 | nd      | nd      | nd      |
| 22.451  | 22.3811 | 22.4009 | 22.3365 |
| 23.6777 | 24.1806 | 23.7999 | 23.4429 |
| 23.0373 | 22.6141 | 22.3881 | 22.8966 |
| 23.4482 | 23.3253 | 23.3454 | 22.7362 |
| 24.8648 | 24.2767 | 24.0025 | 24.9201 |
| 28.2662 | 28.6206 | 28.4977 | 28.6901 |
| 26.218  | 26.5729 | 26.582  | 26.561  |
| 22.6638 | 22.5585 | 22.6526 | 22.6312 |
| 24.1973 | 23.5513 | 23.625  | 23.7435 |
| 24.8389 | 24.8147 | 24.7271 | 24.8357 |
| 30.7533 | 30.6633 | 30.4572 | 30.5709 |
| nd      | nd      | 22.9147 | 22.7772 |
| 24.8066 | 24.9267 | 24.8331 | 25.0323 |

|         |         |         |         |
|---------|---------|---------|---------|
| 28.5979 | 28.5141 | 28.531  | 28.9006 |
| 21.7372 | nd      | 21.3892 | 21.9356 |
| 23.0912 | nd      | 22.1279 | 22.9789 |
| 24.8263 | 24.5335 | 24.9417 | 24.1759 |
| 27.0824 | 27.2525 | 26.9464 | 27.0993 |
| 25.0755 | 25.8034 | 26.0365 | 26.4184 |
| 23.6074 | 23.3724 | 23.4578 | 23.3461 |
| 22.0722 | 22.1872 | 22.5085 | 21.1513 |
| 25.0763 | 24.8248 | 25.2437 | 24.5815 |
| 23.495  | 24.0821 | 24.0506 | nd      |
| 26.2468 | 26.1644 | 25.9893 | 26.0743 |
| 26.2107 | 25.7367 | 26.1675 | 26.397  |
| 24.9191 | 24.2401 | 24.899  | 24.1225 |
| 29.442  | 29.3876 | 29.6423 | 29.4033 |
| 25.4954 | 25.3342 | 25.3963 | 25.6058 |
| 24.6865 | 24.5599 | 24.7073 | 24.7493 |
| 24.0215 | 24.0951 | 23.9809 | 24.4827 |
| 24.2762 | 25.2187 | 25.1039 | 24.7783 |
| 24.3951 | 24.1125 | 24.6239 | 24.5346 |
| 25.0432 | 25.4547 | 25.6183 | 25.5353 |
| 22.9319 | 24.6051 | 24.4396 | 24.6677 |
| 26.0643 | 25.9685 | 26.1777 | 25.7438 |
| 24.7275 | 24.9454 | 24.9972 | 24.8319 |
| 23.2289 | 22.901  | 22.9076 | 22.6375 |
| 24.819  | 24.5204 | 24.6901 | 24.7408 |
| 22.4381 | 22.7103 | 22.7882 | 22.0801 |
| 23.1177 | nd      | 22.7373 | 22.6098 |
| 20.7136 | 21.1162 | 21.0666 | 20.5735 |
| 24.8569 | 25.1866 | 24.6765 | 24.8735 |
| 24.6498 | 24.5192 | 24.4388 | 24.665  |
| nd      | 20.5675 | nd      | 20.9222 |
| 23.9889 | 23.4565 | 23.6913 | 23.5015 |
| 23.4676 | 22.6734 | 22.7442 | 23.4296 |
| nd      | 22.1206 | 20.9989 | 22.4398 |
| nd      | 22.2745 | nd      | 22.6479 |
| 21.8389 | 22.1261 | nd      | 22.5276 |
| 26.6436 | 26.7155 | 26.6356 | 27.0529 |
| 25.6952 | 25.9502 | 25.8348 | 25.2475 |
| 28.0164 | 28.0678 | 28.106  | 28.0555 |
| nd      | 22.3856 | nd      | 22.9636 |
| 30.2613 | 29.3504 | 29.6743 | 29.4557 |

|         |         |         |         |
|---------|---------|---------|---------|
| 32.4437 | 32.2988 | 32.5288 | 32.3615 |
| 26.2294 | 26.3122 | 26.104  | 26.2541 |
| 25.7041 | 25.2094 | 25.3795 | 25.6693 |
| 25.7207 | 25.2558 | 25.4565 | 25.7011 |
| 24.3734 | 24.4114 | 24.0039 | 24.4548 |
| 23.825  | 23.4728 | 23.4116 | 24.1657 |
| 22.1394 | 22.7762 | 22.1644 | 22.5492 |
| 22.843  | 23.0474 | 23.2821 | 22.803  |
| 22.3604 | 22.7758 | 22.5221 | 22.3324 |
| nd      | nd      | nd      | nd      |
| 24.497  | 24.5562 | 24.4205 | 24.71   |
| 25.6442 | 25.8007 | 25.4924 | 24.9882 |
| 26.4029 | 26.4436 | 26.1311 | 26.3234 |
| 28.4631 | 28.3362 | 28.1177 | 28.2658 |
| 23.6835 | 23.4946 | 23.6888 | 23.7126 |
| 28.75   | 28.8009 | 28.8724 | 28.9864 |
| 24.8665 | 24.8005 | 24.2726 | 25.1401 |
| 26.5295 | 26.6466 | 26.5969 | 26.6168 |
| nd      | 22.7485 | nd      | 24.0999 |
| 25.3041 | 25.1364 | 25.4585 | 25.6325 |
| 22.9623 | 23.4243 | 23.7725 | 24.1579 |
| 26.3352 | 26.4343 | 25.9042 | 26.2271 |
| 24.5368 | 24.8088 | 24.5809 | 24.2615 |
| 25.0317 | 24.6029 | 23.434  | 25.0083 |
| 24.7005 | 25.276  | 24.5942 | 25.6275 |
| 22.9304 | 22.894  | 22.9625 | 23.236  |
| nd      | nd      | 22.2729 | 22.2918 |
| nd      | 23.4536 | 24.0801 | 23.0897 |
| 23.9076 | 24.1142 | 23.8458 | 23.7722 |
| 28.8839 | 29.0247 | 28.9534 | 29.2044 |
| nd      | 20.0925 | 20.3751 | 20.3188 |
| 25.2438 | 25.5245 | 25.3778 | 25.0568 |
| 27.9599 | 28.0124 | 27.8146 | 27.7757 |
| 21.2884 | 20.2066 | 21.4836 | nd      |
| 25.7738 | 25.858  | 25.7216 | 25.735  |
| 20.2979 | 20.7166 | 20.2581 | 20.5446 |
| 26.4085 | 26.3047 | 26.1544 | 26.1525 |
| 27.8808 | 27.9208 | 27.8498 | 28.0577 |
| 27.6936 | 27.8461 | 27.5274 | 27.823  |
| 26.3031 | 26.1273 | 25.9548 | 26.2995 |
| 25.1621 | 24.4446 | 24.5631 | 25.1938 |

|         |         |         |         |
|---------|---------|---------|---------|
| 25.9339 | 25.5904 | 25.5692 | 25.7003 |
| 25.2835 | 25.121  | 25.0935 | 25.1912 |
| 25.8943 | 25.8669 | 25.9557 | 26.1084 |
| 25.0249 | 24.8288 | 25.1573 | 24.5953 |
| 23.824  | 23.957  | 23.9549 | 23.9294 |
| 22.4205 | 22.6907 | 22.513  | 22.6575 |
| 21.2853 | nd      | 21.2964 | nd      |
| 24.8363 | 24.6303 | nd      | 24.369  |
| 24.8497 | 24.988  | 24.9385 | 25.1416 |
| 26.5378 | 26.5245 | 26.1878 | 26.4919 |
| 27.5089 | 27.5654 | 27.4385 | 27.5305 |
| 23.1938 | nd      | 22.8788 | 23.3264 |
| 25.6024 | 25.3996 | 25.5647 | 25.1296 |
| 22.9786 | 23.4373 | 23.0377 | 22.221  |
| 24.1247 | 24.2753 | 24.2963 | 24.3523 |
| 27.87   | 26.9674 | 27.179  | 27.2277 |
| 28.4307 | 27.5684 | 27.8731 | 27.8066 |
| nd      | nd      | 21.7292 | 23.2964 |
| 30.0021 | 30.0291 | 30.0753 | 30.2847 |
| 26.691  | 26.6072 | 26.5868 | 26.9355 |
| 22.7938 | nd      | 22.4031 | 22.3698 |
| 27.1672 | 27.2053 | 27.1702 | 27.3216 |
| nd      | 21.2379 | nd      | nd      |
| 23.1554 | 22.3285 | nd      | 21.9081 |
| 24.606  | 24.9145 | 24.4841 | 24.0284 |
| 28.9041 | 28.9255 | 29.1971 | 29.0531 |
| 28.2729 | 28.1628 | 28.138  | 28.2389 |
| 26.6327 | 26.8287 | 26.8042 | 26.5631 |
| 27.3427 | 27.23   | 27.2756 | 27.3235 |
| 29.4202 | 29.3812 | 29.4127 | 29.3203 |
| 21.9863 | 21.8792 | 21.6687 | 21.3518 |
| 20.9711 | nd      | 22.3576 | 21.2796 |
| 23.9822 | 24.0606 | 23.9131 | 24.126  |
| 27.0396 | 26.5452 | 26.8749 | 27.6631 |
| 22.5013 | 21.8874 | 21.9291 | nd      |
| 25.5452 | 25.7468 | 25.347  | 25.5872 |
| 25.2187 | 25.3601 | 24.9959 | 25.4522 |
| 29.4883 | 29.3852 | 29.2267 | 29.5127 |
| 24.3191 | 24.4234 | 24.1752 | 24.5659 |
| 24.8061 | 25.0217 | 24.6713 | 24.9483 |
| 22.5983 | 22.8412 | 22.3543 | 22.412  |

|         |         |         |         |
|---------|---------|---------|---------|
| nd      | nd      | nd      | 21.3247 |
| 18.9738 | 19.9143 | 20.2013 | 19.6278 |
| 25.3213 | 25.5855 | 25.6445 | 25.0183 |
| 23.8992 | 24.5465 | 23.9829 | 24.0484 |
| 23.6086 | 23.8936 | 23.7183 | 23.8405 |
| 23.5247 | 23.4394 | 23.5115 | 22.809  |
| 25.6799 | 25.4076 | 25.4357 | 25.7176 |
| 26.2417 | 25.6455 | 25.4247 | 25.2228 |
| 27.5761 | 27.585  | 27.4077 | 27.4805 |
| 29.9258 | 29.8309 | 29.8566 | 29.7851 |
| 28.5639 | 28.3669 | 28.5058 | 28.4228 |
| 27.3154 | 27.3218 | 26.898  | 27.0367 |
| 29.0238 | 28.8691 | 28.7937 | 28.8186 |
| 27.9023 | 28.2048 | 28.0828 | 28.0064 |
| 28.1806 | 27.8975 | 27.8486 | 27.9154 |
| 21.3336 | 21.3297 | 21.2486 | 22.0651 |
| 23.0333 | 22.7058 | 23.0212 | 23.3384 |
| 30.6492 | 30.6879 | 30.6421 | 30.5291 |
| 24.8302 | 24.4624 | 24.472  | 24.6499 |
| 26.256  | 26.422  | 26.4233 | 26.5716 |
| 23.8328 | 23.838  | nd      | 24.2949 |
| 27.9498 | 27.4802 | 27.8258 | 27.6814 |
| 26.9453 | 26.6337 | 26.5516 | 26.4966 |
| 22.4512 | 22.4447 | 22.0256 | 22.9727 |
| 20.526  | 19.573  | 20.9017 | 20.043  |
| 25.9273 | 26.0242 | 26.018  | 25.4716 |
| 24.3088 | 23.7247 | 23.3028 | 23.7123 |
| 27.3583 | 27.2895 | 27.2923 | 27.0994 |
| nd      | nd      | 22.6027 | 23.0688 |
| 21.7999 | 22.0123 | nd      | 21.8398 |
| 23.1317 | 23.01   | 23.0747 | 23.6023 |
| nd      | 21.6923 | 21.7331 | 21.2799 |
| 20.9007 | 21.4398 | 21.3753 | 21.3634 |
| 25.4125 | 25.3246 | 25.396  | 25.1458 |
| 22.9172 | 22.4989 | 22.6116 | 23.0172 |
| 24.6453 | 24.6815 | 24.526  | 24.2201 |
| 31.4041 | 31.137  | 31.2386 | 31.2536 |
| 28.2795 | 28.3093 | 28.008  | 27.611  |
| 21.9867 | 22.2519 | 22.1025 | 22.0763 |
| nd      | 20.5181 | 20.4348 | 20.2726 |
| 23.1931 | 24.0819 | 24.4741 | 23.6865 |



|         |         |         |         |
|---------|---------|---------|---------|
| nd      | 22.7921 | 22.3208 | 23.0246 |
| 23.6296 | 24.1996 | 23.9876 | 23.6745 |
| 27.6722 | 27.6505 | 27.4767 | 27.4409 |
| 28.8431 | 29.0351 | 28.9187 | 29.0215 |
| 26.8591 | 26.87   | 26.9525 | 26.8927 |
| 28.6853 | 27.9301 | 28.2245 | 28.4797 |
| 26.2862 | 26.2718 | 26.3027 | 26.1679 |
| 28.2208 | 28.3148 | 28.2679 | 28.2614 |
| nd      | nd      | nd      | nd      |
| 24.0227 | 23.7783 | 23.9259 | 24.119  |
| 30.0394 | 30.1756 | 30.1612 | 30.1148 |
| nd      | 22.362  | 22.336  | 23.2985 |
| 22.4357 | 22.7563 | nd      | 22.6931 |
| 23.5443 | 23.6959 | 24.2298 | 23.54   |
| 20.5671 | nd      | 21.7734 | 22.0273 |
| 25.2083 | 24.9534 | 25.0371 | 24.5742 |
| nd      | 21.8859 | 22.3069 | 22.3096 |
| 26.007  | 26.4499 | 26.0626 | 26.1532 |
| 25.1046 | 25.2358 | 24.969  | nd      |
| 22.4067 | 22.7952 | 22.1336 | 21.924  |
| 22.8251 | 22.3306 | 22.3389 | 22.3817 |
| 21.6388 | 23.1559 | 22.7166 | 23.0414 |
| 22.6799 | 23.1967 | 23.5072 | 23.3052 |
| 22.2778 | 23.1796 | 23.103  | 22.5913 |
| 26.6807 | 26.6971 | 26.6439 | 26.3461 |
| 26.9035 | 26.8654 | 26.6968 | 27.0677 |
| 32.595  | 32.5152 | 32.4663 | 32.3199 |
| 24.2952 | 25.117  | 24.7536 | nd      |
| 25.5451 | 25.3377 | 25.4843 | 25.7779 |
| 25.3055 | 24.904  | 24.4914 | 24.814  |
| 31.4203 | 31.4485 | 31.2125 | 31.418  |
| 27.7253 | 27.7418 | 27.6572 | 28.0394 |
| 23.8084 | 24.3764 | 23.8722 | 23.908  |
| 24.4311 | 24.7536 | 24.6698 | 24.4777 |
| 23.1881 | 23.3711 | 23.8457 | 23.3002 |
| 22.0653 | 21.8295 | 21.6661 | 21.6456 |
| 22.9413 | 23.295  | 23.1488 | 23.9899 |
| 24.7733 | 24.0662 | 23.8754 | 24.2612 |
| 28.804  | 28.6837 | 28.5149 | 28.6852 |
| 22.0664 | 21.4752 | 21.8556 | 22.8098 |
| 28.1224 | 28.1327 | 28.3217 | 28.1611 |

|         |         |         |         |
|---------|---------|---------|---------|
| 24.1223 | 24.1633 | 23.9292 | 23.9924 |
| 23.5209 | 23.2846 | 23.5647 | nd      |
| 26.9302 | 26.7674 | 27.1542 | 26.403  |
| 25.4651 | 25.403  | 25.431  | 25.7066 |
| 26.0575 | 26.2016 | 25.9156 | 26.2451 |
| 28.6354 | 28.6489 | 28.5985 | 28.5583 |
| 24.5446 | 24.9288 | 24.9498 | 24.668  |
| 26.0755 | 26.1606 | 26.1587 | 26.1026 |
| 22.7069 | nd      | 22.3352 | nd      |
| 21.7102 | 23.4898 | 22.1829 | 23.784  |
| 22.1358 | 21.9643 | 21.9554 | 22.3078 |
| 20.8993 | 20.8579 | 20.577  | 20.384  |
| 24.4898 | 24.2943 | 24.1972 | 24.7201 |
| 23.1576 | 23.3273 | 23.5244 | 23.4164 |
| 29.5817 | 29.5915 | 29.4643 | 29.4191 |
| 28.4263 | 28.2729 | 28.2013 | 28.5358 |
| 26.5575 | 26.0683 | 26.2067 | 26.3245 |
| 26.8123 | 26.7024 | 26.8121 | 26.8931 |
| 28.5329 | 28.4343 | 28.4229 | 28.4875 |
| 28.6789 | 28.6224 | 28.5599 | 28.6878 |
| 31.8674 | 31.7863 | 31.7836 | 31.7596 |
| 23.2246 | 24.2113 | 23.324  | 23.6492 |
| 24.151  | 23.6044 | 23.9734 | 24.1469 |
| 24.6753 | 24.5409 | 24.3886 | 24.0798 |
| 24.6692 | 24.9959 | 24.6323 | 24.7414 |
| 25.4033 | 25.0683 | 25.5184 | 25.5247 |
| 24.3104 | 23.841  | 23.8268 | 23.866  |
| 24.1251 | 24.1737 | 22.9952 | 24.2026 |
| 22.153  | 22.534  | 21.899  | 22.226  |
| 23.0896 | nd      | 23.5552 | 23.2146 |
| 28.9435 | 28.8904 | 28.7778 | 28.8217 |
| 24.1571 | nd      | 24.0992 | 23.899  |
| 25.5876 | 25.4118 | 25.5343 | 25.3039 |
| nd      | nd      | 21.1016 | 22.6103 |
| 21.4025 | 21.4611 | 21.65   | nd      |
| 23.4404 | 23.5686 | 23.5228 | 23.314  |
| 24.3415 | 24.743  | 24.9385 | 24.8049 |
| 24.2204 | 23.3079 | 23.7259 | 24.4942 |
| 25.1425 | 25.1588 | 24.9882 | 25.3844 |
| 22.0427 | 26.7243 | 24.1552 | 25.7451 |
| 24.4263 | 24.7026 | 24.5788 | 24.5144 |

|         |         |         |         |
|---------|---------|---------|---------|
| 23.9144 | 24.4986 | 23.9136 | 23.3919 |
| 22.1727 | nd      | nd      | nd      |
| 26.7184 | 26.6302 | 26.4171 | 26.7376 |
| 24.6587 | 24.8698 | 24.9457 | 24.7242 |
| 27.0522 | 26.8675 | 26.9099 | 26.869  |
| 26.3111 | 26.3995 | 26.2874 | 26.4982 |
| 25.15   | 24.5946 | 24.6674 | 26.1221 |
| 25.7332 | 25.7564 | 26.2334 | 25.7748 |
| 26.268  | 26.0799 | 26.0798 | 26.4317 |
| 25.9617 | 26.0376 | 25.9369 | 26.2232 |
| 25.8927 | 25.7099 | 26.1014 | 26.3029 |
| 27.2937 | 27.3526 | 27.0084 | 27.3927 |
| 26.4944 | 26.6148 | 26.1231 | 26.4503 |
| 25.3349 | 25.0964 | 24.7801 | 24.7413 |
| 24.0818 | 24.0942 | 24.1758 | 23.9332 |
| 23.5114 | 22.8279 | 23.2508 | 23.4392 |
| 24.669  | 24.535  | 24.3153 | 24.0714 |
| 23.9129 | 24.2728 | 23.7007 | 24.1118 |
| 24.8512 | 24.764  | 24.8285 | 24.8597 |
| 25.2576 | 25.2445 | 25.0293 | 25.5562 |
| 26.3542 | 25.9358 | 26.1845 | 26.4589 |
| 26.3933 | 26.5816 | 26.6294 | 26.4386 |
| 25.5563 | 25.3948 | 25.3757 | 25.3391 |
| 26.0698 | 25.7874 | 25.639  | 25.9932 |
| 26.0095 | 26.2597 | 26.1472 | 25.9614 |
| 26.3969 | 26.5217 | 26.2843 | 26.4761 |
| 24.7687 | 24.5452 | 24.5762 | 25.1386 |
| 24.7018 | 25.451  | 24.6061 | 24.7384 |
| 24.9453 | 25.1793 | 25.6589 | 25.5564 |
| 26.9982 | 27.1382 | 26.9604 | 27.1236 |
| 24.1238 | 24.2028 | 24.2482 | 23.9653 |
| 23.8798 | 23.6229 | 23.8827 | 24.3772 |
| 25.0113 | 25.0697 | 25.3726 | 25.6988 |
| 23.1008 | 23.5658 | 23.1685 | 23.8719 |
| 26.3391 | 26.3971 | 25.8495 | 26.0363 |
| 24.8085 | 24.6178 | 23.2947 | 24.0149 |
| 23.651  | 23.8089 | 24.2075 | 24.0982 |
| 27.4196 | 27.3654 | 27.3064 | 27.6186 |
| 26.9713 | 27.3034 | 27.156  | 27.1712 |
| 21.4588 | 21.8759 | 21.0824 | nd      |
| 28.0087 | 28.3037 | 28.1119 | 28.2514 |

|         |         |         |         |
|---------|---------|---------|---------|
| nd      | 22.8569 | 22.0545 | 22.0297 |
| nd      | nd      | 22.5587 | 23.245  |
| 22.2376 | nd      | 22.7467 | 22.4687 |
| 23.8797 | 23.5596 | nd      | 23.2832 |
| 25.9665 | 26.1691 | 26.1858 | 26.3767 |
| 22.5788 | nd      | 22.1131 | 22.0779 |
| 30.3466 | 30.387  | 30.1926 | 30.0016 |
| 23.3838 | 23.3363 | 22.8378 | 23.2547 |
| 24.1441 | 23.8519 | nd      | 23.1084 |
| 25.7788 | 25.5726 | 25.5816 | 25.7665 |
| 23.6466 | 24.0336 | 23.9854 | 23.6406 |
| 23.5699 | 23.4681 | 23.3243 | 23.029  |
| 24.1996 | 24.3871 | 24.2152 | 24.2518 |
| nd      | 21.1222 | 20.9989 | 20.9817 |
| 21.5686 | 22.1165 | nd      | 21.7774 |
| 21.4026 | 21.0604 | nd      | 22.0269 |
| 30.7019 | 30.5474 | 30.6709 | 30.6139 |
| 23.9681 | 23.6148 | 23.7007 | 23.5601 |
| 22.4073 | nd      | 22.1117 | 23.7473 |
| 25.1029 | 25.2463 | 25.1183 | 25.249  |
| 23.3801 | 22.9842 | 23.3988 | 22.8135 |
| 25.2859 | 25.5702 | 25.7238 | 25.3712 |
| 28.2792 | 28.4014 | 28.1852 | 28.2748 |
| 24.5707 | 24.0523 | 24.1689 | 24.619  |
| 29.9045 | 28.455  | 28.2969 | 28.2584 |
| 26.3182 | 26.2201 | 26.1627 | 26.3923 |
| 26.2667 | 26.1469 | 26.0086 | 26.1077 |
| 24.74   | 24.1215 | 24.4573 | 24.4257 |
| 22.0864 | 22.2886 | 22.031  | nd      |
| 25.6577 | 25.8468 | 25.6068 | 25.9077 |
| 25.6177 | 25.664  | 25.7748 | 26.2702 |
| 22.2523 | 21.9467 | nd      | 21.4746 |
| 26.2259 | 26.057  | 26.2592 | 26.5571 |
| 23.4415 | 24.0277 | 23.492  | 23.3728 |
| 26.7033 | 26.4318 | 26.4486 | 26.7547 |
| 24.4279 | 24.483  | 24.4242 | 24.5937 |
| 25.4266 | 25.117  | 25.4646 | 25.5924 |
| 21.5429 | 21.5329 | 21.677  | 20.4928 |
| 24.224  | 24.24   | 24.0927 | 25.0612 |
| 23.1944 | 22.901  | 23.191  | 22.9444 |
| 23.6487 | 24.843  | 24.8775 | 24.1688 |

|         |         |         |         |
|---------|---------|---------|---------|
| nd      | 23.8499 | 23.8745 | 24.0241 |
| 26.3016 | 26.3176 | 26.4277 | 26.527  |
| 25.0388 | 25.0585 | 24.9    | 25.2336 |
| 24.0418 | 24.6238 | 24.3557 | 24.6643 |
| 26.1235 | 26.1889 | 26.0024 | 26.4896 |
| 23.4184 | 23.4468 | 23.5497 | 23.9235 |
| 22.3751 | nd      | 22.259  | 22.1204 |
| 28.4609 | 28.5241 | 28.5131 | 28.3973 |
| 24.5849 | 24.2962 | 24.7805 | 25.0021 |
| 24.7538 | 24.6256 | 24.6832 | 24.9426 |
| nd      | nd      | 22.6694 | 22.7982 |
| 27.1026 | 27.1293 | 27.0049 | 27.227  |
| 25.5898 | 25.0876 | 25.3349 | 25.6834 |
| 23.9829 | 23.9394 | 23.3732 | 23.7051 |
| 21.1296 | nd      | 21.0299 | 21.427  |
| 25.7507 | 25.4037 | 25.1455 | 25.4923 |
| 28.3306 | 28.4474 | 28.3638 | 28.4482 |
| nd      | nd      | nd      | nd      |
| 24.2179 | 23.3926 | 24.4804 | 23.8036 |
| 26.6211 | 26.5451 | 26.4692 | 26.6078 |
| 22.1758 | nd      | 21.8031 | 21.6418 |
| 25.0485 | 24.8024 | 24.7084 | 24.802  |
| 23.6754 | 23.3903 | nd      | nd      |
| 27.4261 | 27.2245 | 27.3293 | 27.3477 |
| nd      | nd      | nd      | nd      |
| 24.2636 | 23.0461 | 23.675  | 23.766  |
| 23.8486 | 23.8039 | 23.7223 | 24.0825 |
| 25.928  | 26.1056 | 25.8654 | 25.891  |
| 23.1669 | 22.3224 | 23.031  | 23.8619 |
| 23.1477 | 23.1946 | 23.0249 | 23.2797 |
| 28.1447 | 27.9885 | 28.1705 | 28.0255 |
| 23.3589 | 23.4839 | 23.4621 | 23.1892 |
| 26.4653 | 26.5023 | 26.2349 | 26.5168 |
| nd      | 22.508  | nd      | 22.2591 |
| 22.0037 | 22.2001 | 21.8703 | 22.6197 |
| 22.3603 | 22.0819 | 22.6529 | 22.298  |
| 25.5612 | 25.7973 | 25.2334 | 25.3835 |
| 23.3877 | nd      | 22.6329 | 23.716  |
| 22.3207 | 21.973  | 21.6904 | 22.533  |
| 23.7312 | 23.4636 | 23.1073 | 23.524  |
| 24.4075 | 24.4823 | 24.4799 | 24.3946 |

|         |         |         |         |
|---------|---------|---------|---------|
| 22.2068 | 22.4799 | 22.4981 | 22.0873 |
| 22.9203 | 23.1955 | 23.0321 | 25.0916 |
| 28.4436 | 28.4929 | 28.3671 | 28.7312 |
| 23.0994 | 23.8945 | 23.4392 | 23.0989 |
| 24.293  | 24.5513 | 24.5327 | 24.8511 |
| 20.1293 | nd      | 20.3864 | nd      |
| 24.1255 | 24.0439 | 24.1018 | 23.7851 |
| 22.0912 | 23.3192 | 23.3094 | 23.1228 |
| 23.5547 | 22.9136 | 22.6271 | nd      |
| 23.195  | 22.9408 | 23.343  | 23.9342 |
| 22.8807 | 22.993  | 22.8435 | 22.4332 |
| 27.6977 | 27.6464 | 27.6122 | 27.6064 |
| 25.4158 | 25.6806 | 25.2975 | 25.2895 |
| 26.3989 | 26.6141 | 26.3326 | 26.2977 |
| 24.2444 | 24.5237 | 24.1517 | 24.0115 |
| 21.6346 | 21.6039 | 21.525  | 21.625  |
| 22.7396 | 22.6201 | 22.4745 | 22.6841 |
| 26.6267 | 26.2464 | 26.5945 | 27.0189 |
| 26.5406 | 26.4318 | 26.3197 | 26.7929 |
| 25.3763 | 25.136  | 24.541  | 24.2453 |
| 26.225  | 26.2958 | 26.486  | 26.7461 |
| 27.1349 | 26.8593 | 27.0967 | 27.1949 |
| 25.4121 | 24.8188 | 25.4728 | 25.3179 |
| 26.3477 | 26.3989 | 26.2013 | 26.6903 |
| 26.5609 | 26.7152 | 26.0663 | 26.5035 |
| 26.8915 | 26.6894 | 26.7087 | 27.3075 |
| 25.4858 | 25.4418 | 25.6776 | 24.8137 |
| 24.1896 | 23.8376 | 23.2663 | 24.5432 |
| 23.8502 | 23.5692 | 23.3358 | 24.2101 |
| 24.9759 | 25.3734 | 25.4183 | 25.4114 |
| 24.943  | 24.5313 | 24.9077 | 25.3538 |
| 26.4931 | 26.3742 | 26.2305 | 26.7192 |
| 24.3551 | 24.987  | 25.2278 | 25.5191 |
| 26.5641 | 26.4055 | 26.5892 | 26.8473 |
| 24.9313 | 25.097  | 25.2134 | 25.4285 |
| 24.9137 | 24.9034 | 24.59   | 24.8676 |
| 26.3112 | 26.2028 | 26.2046 | 26.4994 |
| 24.9083 | 24.6798 | nd      | 25.138  |
| 23.9367 | 24.0266 | 24.1448 | 23.8949 |
| 26.9096 | 26.7794 | 26.8422 | 27.0829 |
| 24.1905 | 24.469  | 24.1962 | 24.403  |

|         |         |         |         |
|---------|---------|---------|---------|
| 26.48   | 26.5579 | 26.2427 | 26.4    |
| 25.3549 | 25.2411 | 25.6097 | 25.9371 |
| 24.5791 | 24.7759 | 24.6419 | 25.1707 |
| 24.5543 | 24.7973 | 24.2575 | 24.086  |
| nd      | 24.0853 | 24.2539 | 24.5039 |
| 24.6427 | 24.1948 | 24.7102 | 25.3558 |
| 23.6948 | 23.6449 | 23.8267 | 23.8363 |
| 23.7443 | 23.7923 | 23.4507 | 23.9398 |
| 24.9061 | 24.8155 | 24.8376 | 24.7389 |
| 28.5357 | 28.5007 | 28.573  | 28.8038 |
| 26.6628 | 26.3504 | 26.4411 | 26.6555 |
| 26.5682 | 26.5208 | 26.412  | 27.0559 |
| 26.8585 | 26.7161 | 26.8261 | 26.7484 |
| 27.1508 | 26.7491 | 27.0796 | 27.1023 |
| 26.4344 | 26.2457 | 26.2072 | 26.4932 |
| 24.9443 | 24.9774 | 24.7549 | 25.2956 |
| 27.2772 | 27.0695 | 27.2703 | 27.3647 |
| 27.7884 | 27.9321 | 27.9961 | 28.025  |
| 27.3257 | 27.2535 | 27.3493 | 27.3997 |
| 27.427  | 27.6187 | 27.4533 | 27.8557 |
| 27.5726 | 27.8692 | 27.6101 | 27.7624 |
| 25.8265 | 25.6637 | 25.9499 | 26.0173 |
| 24.9866 | 24.8746 | 24.8898 | 25.4971 |
| 25.9239 | 25.6886 | 25.8532 | 25.7471 |
| 27.6643 | 27.2445 | 27.49   | 27.8513 |
| 24.6122 | 24.4764 | 24.8028 | 25.049  |
| 26.2657 | 26.0497 | 26.2774 | 26.4713 |
| 26.0456 | 26.0334 | 26.1    | 26.4152 |
| 23.0301 | 23.7495 | 23.4664 | 22.6622 |
| 26.3274 | 26.5318 | 26.2668 | 26.3687 |
| 26.7928 | 26.8089 | 26.7433 | 27.2289 |
| 27.0956 | 27.0214 | 26.9266 | 26.9913 |
| 26.2912 | 26.2133 | 26.3139 | 26.3868 |
| 25.3323 | 25.5348 | 25.1623 | 25.4946 |
| 22.9832 | nd      | nd      | 23.3736 |
| 24.3505 | 24.2314 | 24.2651 | 24.7714 |
| 24.7071 | 25.0196 | 24.4529 | 24.9228 |
| 25.231  | 25.1746 | 25.4486 | 25.3577 |
| 24.9549 | 24.9162 | 24.7946 | 25.0975 |
| 28.016  | 27.7708 | 28.1455 | 28.3268 |
| 26.8932 | 26.7316 | 26.7465 | 27.3059 |

|         |         |         |         |
|---------|---------|---------|---------|
| 22.9659 | 23.0218 | 23.0328 | 23.444  |
| nd      | 23.7121 | 24.3174 | 24.0288 |
| 26.4792 | 26.0696 | 26.1309 | 26.4232 |
| 27.5024 | 27.2619 | 27.542  | 27.8383 |
| 27.4566 | 27.4605 | 27.1876 | 27.463  |
| 26.2127 | 26.1237 | 26.1748 | 26.2044 |
| 25.9004 | 20.9769 | 25.4934 | 21.9474 |
| 22.1765 | 22.0157 | 21.8562 | 22.0347 |
| 26.1622 | 26.4187 | 26.3788 | 26.3232 |
| 26.9426 | 26.9976 | 27.0589 | 27.2185 |
| 26.8848 | 26.902  | 26.7406 | 27.1056 |
| 28.1509 | 28.0899 | 28.137  | 28.2535 |
| 20.9341 | 21.4788 | 20.3892 | nd      |
| 22.7032 | 23.2225 | 22.9965 | 22.9419 |
| 27.7045 | 27.8513 | 27.6258 | 27.4394 |
| 26.998  | 26.9058 | 27.0106 | 27.2318 |
| 29.9347 | 29.9714 | 29.9582 | 29.8488 |
| 22.1713 | 22.6129 | nd      | nd      |
| 25.2265 | 25.1536 | 25.2166 | 25.4565 |
| 22.7908 | 23.0733 | 22.6407 | 23.0258 |
| 24.0563 | 22.4037 | 22.5238 | 22.2389 |
| 25.1988 | 25.4354 | 25.3351 | 25.9784 |
| 22.0669 | 22.7226 | 22.9089 | 22.2337 |
| 26.8288 | 27.0134 | 26.7782 | 26.6409 |
| 25.1075 | 25.0923 | 24.897  | 25.1158 |
| 22.557  | nd      | 22.3707 | 22.5228 |
| 24.501  | 24.6617 | 24.1698 | 24.5593 |
| 25.2018 | 24.2204 | nd      | nd      |
| 22.5322 | 20.482  | 22.2956 | 24.4298 |
| 27.6689 | 27.6255 | 27.8986 | 28.9467 |
| 29.2087 | 29.3817 | 29.1543 | 29.0065 |
| 22.6436 | 25.1765 | 23.5563 | 23.1859 |
| nd      | 24.5643 | 25.6377 | 25.8483 |
| 32.1383 | 32.1338 | 32.1224 | 31.7018 |
| 25.8751 | 25.6921 | 25.6465 | 24.1698 |
| 26.2202 | 27.8424 | 27.5617 | 26.8662 |
| 22.1542 | 22.3674 | 22.242  | 22.1442 |
| 24.0681 | 24.3012 | 23.985  | 24.1643 |
| 25.0278 | 25.414  | 24.9304 | 25.0705 |
| 23.8753 | 23.7849 | 24.4072 | 24.2479 |
| 26.3847 | 26.309  | 26.5607 | 26.746  |



|         |         |         |         |
|---------|---------|---------|---------|
| 25.0187 | 24.7181 | 24.8232 | 25.2096 |
| 25.3057 | 25.2523 | 25.0697 | 24.8708 |
| 23.1401 | 22.9096 | nd      | 22.4429 |
| 25.2635 | 25.1804 | 25.2725 | 25.4615 |
| nd      | nd      | 23.0374 | 23.2509 |
| 24.2867 | 23.6807 | 23.7043 | 23.8373 |
| 23.5691 | 23.2425 | 23.1153 | 23.6656 |
| 21.6778 | 23.2429 | 23.1783 | 23.2591 |
| 24.7284 | 24.8167 | 24.8201 | 24.8451 |
| 22.8939 | 22.7313 | 22.6623 | 22.6399 |
| 24.8743 | 24.262  | 24.6244 | 25.1638 |
| 22.9066 | 22.3389 | 22.8188 | 22.8451 |
| 23.85   | 24.1578 | 23.8284 | 23.8104 |
| nd      | 23.0734 | 23.2013 | 22.7847 |
| 25.5997 | 25.6649 | 25.7727 | 25.4387 |
| 28.4855 | 27.5533 | 27.8232 | 27.681  |
| 26.8825 | 25.6079 | 26.0959 | 26.3162 |
| 25.2058 | 24.0914 | 24.7615 | 25.0783 |
| 23.5345 | 23.5951 | 23.1072 | 23.695  |
| 27.4251 | 27.3537 | 27.4421 | 27.386  |
| 23.2613 | 22.7847 | 23.1503 | 23.437  |
| 24.1286 | 24.4183 | 24.1966 | 24.5117 |
| 25.3256 | 25.2426 | 25.4561 | 25.5911 |
| 26.2425 | 26.6362 | 26.4196 | 26.3066 |
| 21.8016 | 21.2323 | 22.0538 | 22.5626 |
| nd      | 22.0311 | 23.7267 | 23.4737 |
| 27.0896 | 27.1664 | 26.9799 | 27.2375 |
| 25.9218 | 25.7279 | 25.3242 | 25.2583 |
| 24.3996 | 22.694  | 24.3529 | 25.0615 |
| 28.2149 | 28.2802 | 28.1353 | 28.2971 |
| nd      | 22.3134 | 22.6598 | 22.3782 |
| nd      | 23.6331 | 23.6709 | 23.2549 |
| 21.3438 | 21.0156 | nd      | 21.2786 |
| 21.6971 | nd      | 22.3465 | 23.0546 |
| 22.2642 | 22.43   | 22.4393 | 22.0346 |
| nd      | 21.9506 | 22.3973 | 22.7007 |
| 27.8318 | 27.7761 | 27.7221 | 27.8467 |
| 25.5271 | 25.5489 | 25.4092 | 25.1745 |
| 24.1861 | 24.7907 | 24.3196 | 24.2817 |
| 27.8286 | 27.8114 | 27.6697 | 27.6149 |
| 25.0616 | 24.9912 | 25.1479 | 25.7296 |

|         |         |         |         |
|---------|---------|---------|---------|
| 26.9643 | 26.8634 | 26.8293 | 26.737  |
| 23.5964 | 23.4145 | 23.8383 | 24.0387 |
| 22.8688 | 25.7773 | 25.3961 | 25.2868 |
| 27.5007 | 28.3755 | 28.0911 | 27.7989 |
| 30.8945 | 30.9491 | 30.8579 | 30.8824 |
| 27.2149 | 27.5901 | 27.4221 | 27.6029 |
| 27.3542 | 27.8283 | 27.7531 | 27.0769 |
| 28.7478 | 28.8427 | 28.6699 | 28.818  |
| 28.8855 | 29.9503 | 29.7609 | 28.9267 |
| 23.668  | 23.6213 | 23.4661 | 23.4158 |
| 19.9164 | 21.9206 | nd      | 21.4195 |
| 22.6191 | 23.3061 | 22.6046 | 22.2756 |
| 28.2677 | 28.5983 | 28.2791 | 28.465  |
| 29.538  | 29.6857 | 29.5835 | 29.2225 |
| 25.0889 | 25.4867 | 25.349  | 25.1686 |
| 27.8967 | 27.8882 | 28.0677 | 27.6221 |
| 26.5536 | 27.0161 | 26.8869 | 26.6845 |
| 22.7616 | 23.0695 | 22.2737 | 22.3498 |
| 24.9742 | 24.7209 | 24.8349 | 24.7689 |
| 30.4205 | 30.371  | 30.2223 | 30.2078 |
| 23.7558 | 24.5296 | 23.9319 | 23.9515 |
| 22.3385 | 21.9373 | 21.7448 | nd      |
| 24.5222 | 24.4596 | 24.4052 | 24.45   |
| nd      | 22.9085 | 22.7534 | 23.0486 |
| 21.969  | 22.007  | 22.2663 | 22.6565 |
| 24.0508 | 24.7316 | 24.3637 | 24.192  |
| 23.6228 | 23.5913 | 23.5116 | 24.1292 |
| 23.3753 | 23.3836 | 22.9523 | 23.0114 |
| 24.8783 | 25.3501 | 25.0592 | 25.5491 |
| 25.8681 | 25.8573 | 26.0825 | 26.3298 |
| 25.377  | 25.4542 | 25.1362 | 24.6775 |
| 23.9704 | 25.0114 | 24.9717 | 24.8514 |
| 28.2663 | 28.3404 | 28.5451 | 28.2697 |
| 25.5521 | 24.45   | 24.6353 | 24.4887 |
| 25.3086 | 25.3251 | 24.9865 | 24.8849 |
| 26.4121 | 26.2206 | 26.1554 | 26.2925 |
| 26.7699 | 27.1152 | 26.697  | 26.6948 |
| 23.5247 | 23.5083 | 23.1753 | 23.2341 |
| nd      | nd      | 22.4346 | 22.5881 |
| 26.834  | 27.1744 | 26.9334 | 25.7268 |
| 27.6245 | 27.5304 | 27.7169 | 27.9315 |

|         |         |         |         |
|---------|---------|---------|---------|
| 23.2334 | 24.8387 | 25.1864 | 24.9734 |
| 29.3911 | 29.734  | 29.4137 | 29.1782 |
| nd      | 22.7906 | nd      | 22.5438 |
| 24.511  | 24.0531 | 24.2701 | 24.1162 |
| 24.32   | 24.5469 | 23.7077 | 24.0655 |
| 23.3141 | 23.0714 | 23.45   | 23.0146 |
| 23.7985 | 23.4098 | 23.8304 | 23.6006 |
| nd      | 24.1148 | 24.0359 | 23.5417 |
| 21.5845 | 21.7542 | 21.4852 | 21.5061 |
| 24.0176 | 23.9175 | 23.4362 | 23.5615 |
| 23.7491 | 25.6515 | 25.0604 | 25.1463 |
| 21.7921 | 22.0432 | 21.9443 | 22.1789 |
| 22.5289 | 21.603  | 22.4669 | 23.3961 |
| 25.6858 | 26.1158 | 25.6907 | 26.4205 |
| 22.8832 | 23.7154 | 23.2006 | 24.5388 |
| 26.0344 | 25.9454 | 25.6717 | 25.8234 |
| 26.6799 | 26.9879 | 26.7161 | 26.8377 |
| 25.6535 | 24.5771 | 24.8144 | 24.9787 |
| 24.9858 | 24.715  | 24.9198 | 24.9936 |
| 27.3908 | 27.2771 | 27.2461 | 27.7046 |
| 30.3832 | 30.2086 | 30.2498 | 30.2743 |
| 23.7214 | 22.1352 | 22.5747 | 22.1107 |
| 27.6955 | 27.6181 | 27.7446 | 27.8332 |
| 22.3661 | nd      | 22.9132 | 22.9223 |
| 21.767  | 21.9631 | 21.8646 | 22.0513 |
| 21.5209 | 21.8688 | 20.9987 | 20.9109 |
| nd      | 22.511  | nd      | nd      |
| 22.7517 | 23.5365 | 23.3788 | 22.7613 |
| 24.8708 | 24.89   | 25.0427 | 25.1377 |
| 28.0822 | 28.6972 | 28.2943 | 28.393  |
| 23.053  | 22.9967 | nd      | 22.0699 |
| 23.6312 | 23.834  | 23.9571 | 23.6183 |
| 27.9782 | 28.1127 | 27.9761 | 27.7432 |
| nd      | nd      | nd      | 23.5612 |
| 23.712  | 23.5059 | 23.2426 | 24.0539 |
| 23.1759 | 23.0201 | 23.3481 | 23.1798 |
| 23.3901 | 22.8333 | 23.1415 | 23.2335 |
| 21.3877 | nd      | nd      | 21.3337 |
| 20.4724 | 21.879  | 21.8689 | 21.7118 |
| 26.6232 | 26.3933 | 26.5512 | 26.0878 |
| 22.3811 | 22.2685 | 21.8757 | 22.0193 |

|         |         |         |         |
|---------|---------|---------|---------|
| nd      | 21.8078 | nd      | nd      |
| 21.5743 | 22.0086 | 21.3877 | 21.3187 |
| 29.4272 | 29.3046 | 29.62   | 29.3782 |
| 23.5915 | 23.6401 | 23.2711 | 23.6136 |
| 24.6153 | 24.9387 | 25.268  | 24.9654 |
| 26.6763 | 26.9107 | 26.6153 | 26.5684 |
| 24.9764 | 24.8964 | 25.0255 | 24.8395 |
| 23.9208 | 24.6631 | 24.8688 | 24.7622 |
| 23.8839 | nd      | 23.3737 | 24.2321 |
| 24.8404 | 24.8442 | 24.7182 | 24.9065 |
| 23.8249 | 24.1322 | 23.4934 | 23.9362 |
| 25.5476 | 25.7965 | 25.6799 | 25.9621 |
| 23.9631 | 23.8136 | 23.6614 | 24.1834 |
| 24.8463 | 24.801  | 24.8608 | 25.267  |
| 23.7803 | 23.571  | 23.6676 | 23.9952 |
| 23.4031 | 23.5885 | 23.6699 | 23.4941 |
| 25.3163 | 25.2344 | 25.3272 | 25.2074 |
| 26.5009 | 26.7187 | 26.7877 | 26.5408 |
| 26.626  | 26.6749 | 26.4943 | 26.6592 |
| 24.7217 | 24.8911 | 24.8874 | 24.9391 |
| 23.1762 | 23.2721 | 23.2888 | 23.7286 |
| nd      | 22.6471 | nd      | 22.7891 |
| 26.2282 | 26.3031 | 26.2123 | 26.0826 |
| 23.8324 | 23.3894 | nd      | 23.3275 |
| 24.4235 | 24.0064 | 24.1173 | 24.3183 |
| 21.8238 | 21.8906 | 21.5477 | 21.1058 |
| 23.2333 | nd      | 23.6356 | 23.5148 |
| 22.9156 | 22.5182 | 22.2922 | 22.8015 |
| 24.3679 | 24.6391 | 24.5124 | 24.516  |
| 28.6778 | 28.8301 | 28.7708 | 29.1961 |
| 27.651  | 27.1011 | 27.2891 | 27.3029 |
| 30.393  | 30.259  | 30.5454 | 30.245  |
| 27.3446 | 27.4077 | 27.4391 | 27.3011 |
| 26.4746 | 26.5738 | 27.2316 | 27.2611 |
| 25.4377 | 25.8403 | 25.75   | 25.3595 |
| 23.7729 | 23.9723 | 24.126  | 23.8731 |
| 27.5571 | 27.4328 | 27.4666 | 27.1054 |
| nd      | nd      | 21.6788 | nd      |
| 25.3897 | 25.4888 | 24.9308 | 25.0179 |
| nd      | nd      | 23.5739 | 23.1087 |
| nd      | 22.8521 | 23.3645 | 23.6241 |

|         |         |         |         |
|---------|---------|---------|---------|
| 24.4534 | 24.5224 | 24.5082 | 24.6682 |
| 27.0557 | 27.3428 | 26.8923 | 27.0397 |
| 26.6847 | 27.11   | 26.8186 | 26.6252 |
| 29.9021 | 29.86   | 29.9007 | 30.1283 |
| 26.1949 | 26.8132 | 26.4755 | 26.2069 |
| 29.9246 | 29.867  | 29.867  | 30.1051 |
| 25.5972 | 25.4291 | 25.6409 | 25.6284 |
| 26.4795 | 26.1505 | 26.6337 | 26.8758 |
| 23.9269 | 24.3064 | 24.2258 | 24.6125 |
| 22.2568 | 22.3916 | nd      | 22.7017 |
| 22.7862 | 22.7114 | 22.7366 | 23.0047 |
| nd      | 22.3771 | 21.9782 | 21.5662 |
| 24.5147 | 24.9133 | 24.5129 | 24.2449 |
| 22.7877 | 22.71   | 23.1038 | 23.6257 |
| nd      | 24.2403 | 24.3649 | 24.9979 |
| 23.5723 | 23.601  | 23.9847 | 24.0576 |
| 23.4676 | 23.763  | 23.6698 | 23.2453 |
| 24.002  | 24.0083 | 24.3553 | 24.7423 |
| 25.7167 | 25.7399 | 25.7584 | 26.1752 |
| 24.4236 | 24.0223 | 24.3573 | 24.8551 |
| 24.036  | 23.5157 | 23.8359 | 24.0219 |
| 25.7299 | 25.7895 | 25.7631 | 25.8694 |
| 23.5175 | nd      | 23.1772 | 23.5876 |
| 21.4891 | 22.0041 | nd      | 22.061  |
| nd      | 24.5419 | 24.4664 | 24.3795 |
| 23.0009 | 22.766  | 22.8433 | 23.2975 |
| 26.209  | 26.0346 | 25.9334 | 26.2301 |
| nd      | 22.1932 | 22.9412 | 22.6857 |
| 24.9491 | 25.0365 | 25.1295 | 24.9971 |
| 23.7008 | 23.9875 | 23.5827 | 24.2733 |
| 23.4214 | 23.2669 | 23.2623 | 23.2728 |
| 27.1374 | 27.1339 | 27.1977 | 27.451  |
| 25.4738 | 25.4364 | 25.3384 | 25.2949 |
| 22.3236 | 22.5195 | nd      | 22.4039 |
| 26.7375 | 26.3448 | 26.4109 | 26.372  |
| 24.5467 | 24.3754 | 24.3633 | 24.4731 |
| nd      | nd      | 20.18   | 19.7622 |
| 23.0363 | 22.9955 | nd      | 22.2895 |
| 23.6763 | 23.5014 | 23.1683 | 23.0975 |
| 22.0813 | 22.1033 | 21.9996 | 22.4129 |
| 22.3328 | 22.5704 | 22.4024 | 22.189  |

|         |         |         |         |
|---------|---------|---------|---------|
| 24.199  | 24.0641 | 24.0553 | 24.3045 |
| 22.8015 | 22.8258 | 22.7414 | 23.0835 |
| 22.2402 | nd      | 22.8509 | 23.0471 |
| 24.7744 | 24.7737 | 24.8473 | 24.7783 |
| 25.4193 | 25.5203 | 25.5547 | 25.4731 |
| 27.3698 | 26.4332 | 26.7667 | 26.4462 |
| 28.4145 | 27.5024 | 27.9644 | 27.7032 |
| 25.5167 | 25.1077 | 25.5748 | 25.584  |
| 23.3298 | 23.0078 | 23.1018 | nd      |
| 22.685  | 22.5028 | nd      | 22.6415 |
| 23.6572 | 23.6482 | 24.0158 | 23.9009 |
| 27.0233 | 26.7544 | 26.742  | 26.7001 |
| 22.7458 | 22.5044 | 22.3466 | 22.4801 |
| 23.3882 | 23.6213 | 23.7883 | 23.6502 |
| 25.8228 | 26.3776 | 26.1112 | 26.0916 |
| 24.5892 | 24.7718 | 23.8301 | 24.4051 |
| nd      | nd      | nd      | nd      |
| 25.4737 | 25.4939 | 25.5798 | 26.0307 |
| 24.863  | 25.0563 | 24.5406 | 24.1629 |
| 23.699  | nd      | 23.0108 | 23.3938 |
| 23.0439 | nd      | 23.0754 | 23.0196 |
| 25.4839 | 25.5628 | 25.7236 | 25.6292 |
| 28.7    | 28.7078 | 28.7756 | 28.6983 |
| 33.3864 | 33.058  | 33.3315 | 33.318  |
| 32.9645 | 32.9623 | 33.1418 | 32.9241 |
| 25.6491 | 25.4057 | 25.7693 | 25.8021 |
| 26.7287 | 26.5935 | 26.6861 | 26.8823 |
| 24.8416 | 24.2952 | 24.5541 | 25.7755 |
| 26.2249 | 25.837  | 25.9949 | 26.1184 |
| 24.5819 | 24.5184 | 24.6769 | 24.136  |
| nd      | 21.3356 | 21.3046 | 22.1404 |
| 21.0209 | 21.7741 | 21.2945 | 21.9223 |
| 23.1982 | 23.0435 | 22.5314 | 23.2387 |
| 24.5482 | 24.1443 | 23.3651 | 23.7356 |
| 25.1341 | 25.3636 | 25.5765 | 25.2428 |
| 21.723  | 22.1244 | 21.4904 | 21.2553 |
| 27.4151 | 27.3116 | 27.2557 | 27.5134 |
| 27.2185 | 27.0472 | 27.0363 | 27.0339 |
| 30.7088 | 30.8654 | 30.7191 | 30.7442 |
| 30.7572 | 30.6438 | 30.7167 | 30.5506 |
| 28.8124 | 29.0472 | 28.9523 | 28.9554 |

|         |         |         |         |
|---------|---------|---------|---------|
| 29.997  | 30.0802 | 30.0358 | 30.1404 |
| nd      | 24.0227 | 22.2172 | 22.8888 |
| 25.9654 | 26.5233 | 26.2576 | 25.5934 |
| 27.0715 | 26.9178 | 27.0213 | 26.8548 |
| 22.972  | 22.1456 | 22.6393 | 22.0403 |
| 26.2605 | 25.9147 | 25.822  | 26.5748 |
| 23.7259 | 25.1883 | 23.5017 | 23.6883 |
| 22.5809 | 22.2194 | 21.9349 | 21.8605 |
| 22.0521 | 21.8961 | 21.5111 | 21.5803 |
| 23.3123 | 23.8395 | 23.8655 | 23.138  |
| 30.0711 | 30.0355 | 30.1527 | 29.8277 |
| 24.297  | 23.8971 | 24.1301 | 23.567  |
| 29.9464 | 29.8917 | 29.9687 | 30.1211 |
| 33.1265 | 33.1271 | 33.154  | 33.0708 |
| 24.4567 | 24.8343 | 24.6359 | 24.7445 |
| nd      | 22.7693 | 22.5754 | 22.6046 |
| 25.8487 | 25.7584 | 25.7924 | 25.9484 |
| 25.2045 | 24.8952 | 24.9844 | 24.1398 |
| 23.0351 | 23.465  | 22.7313 | 23.3355 |
| 25.2541 | nd      | nd      | 24.4406 |
| 21.6261 | 21.2217 | nd      | 21.7168 |
| 23.3565 | 23.4946 | 23.1591 | 23.1246 |
| 27.6428 | 27.7596 | 27.5383 | 27.6152 |
| 22.2931 | 22.5172 | 22.016  | 22.0787 |
| 23.9888 | 25.4512 | 25.592  | 25.4575 |
| 27.4852 | 27.3004 | 27.4612 | 27.4432 |
| 23.7258 | 23.9238 | 23.4472 | 23.3909 |
| nd      | 22.4799 | 22.6146 | 23.5541 |
| 27.0231 | 26.5959 | 27.1221 | 27.0981 |
| 22.36   | 22.6722 | 22.3258 | 22.7028 |
| 23.5081 | 23.9108 | 23.5711 | 23.9979 |
| 21.3357 | 21.1313 | 20.3146 | 21.5421 |
| 22.5684 | 22.2058 | 22.1467 | 22.533  |
| 22.4553 | 22.7106 | nd      | 21.5673 |
| 21.551  | 22.1732 | 21.9651 | 22.0814 |
| 25.0507 | 25.037  | 25.1848 | 25.0961 |
| 22.7074 | nd      | 22.9347 | 22.8448 |
| 24.5866 | 24.0947 | 24.3463 | 24.2145 |
| 27.0567 | 27.1601 | 27.2502 | 27.0809 |
| 22.1152 | 22.3711 | 22.4896 | 22.3632 |
| 24.5921 | 24.8578 | 24.199  | 23.755  |

|         |         |         |         |
|---------|---------|---------|---------|
| 23.0781 | 22.7906 | 22.5658 | 23.3098 |
| 23.0324 | 22.9742 | 23.5883 | 23.7681 |
| 22.0003 | 22.0958 | 21.9641 | 21.3366 |
| 24.061  | 23.8915 | 24.0427 | 24.2314 |
| 26.4034 | 26.221  | 26.6214 | 26.2863 |
| 24.268  | 24.064  | 24.3364 | 24.9499 |
| nd      | 22.8181 | 22.9278 | 24.7217 |
| nd      | 22.1529 | 21.8799 | 22.0934 |
| 22.8896 | 23.3835 | 23.0253 | 22.4327 |
| nd      | 21.8232 | 21.6737 | 21.8841 |
| 22.906  | 22.2389 | nd      | 22.2267 |
| 25.2575 | 25.1155 | 25.3627 | 25.842  |
| 29.6951 | 29.5127 | 29.5116 | 29.5847 |
| 29.8651 | 29.4713 | 29.9147 | 29.8084 |
| 28.5119 | 28.5052 | 28.8065 | 29.0132 |
| 26.3448 | 26.5106 | 26.7997 | 26.5565 |
| 25.2028 | 24.9218 | 25.1128 | 25.6408 |
| 21.2413 | 20.4715 | nd      | nd      |
| 28.0549 | 27.9914 | 27.8953 | 27.8825 |
| 22.9014 | 23.8936 | 23.1299 | 22.7482 |
| nd      | nd      | nd      | 22.2302 |
| nd      | 20.6634 | 20.8203 | 21.4047 |
| 26.6564 | 26.6472 | 26.5487 | 27.3381 |
| nd      | 22.3648 | 22.8045 | 22.894  |
| 21.0207 | 21.2226 | nd      | 20.7657 |
| 22.7712 | 23.3653 | 22.7665 | 23.262  |
| 23.6233 | 23.8704 | 23.273  | 23.6831 |
| 21.7896 | 21.9656 | 21.7953 | 21.3967 |
| 25.5193 | 25.4332 | 25.197  | 25.6963 |
| 24.2707 | 24.552  | 24.7857 | 24.3854 |
| 22.8029 | 22.299  | nd      | nd      |
| 27.1944 | 27.4862 | 27.5306 | 27.3467 |
| 25.5581 | 25.5109 | 25.5839 | 25.4452 |
| 22.9561 | 22.7479 | 22.6349 | 22.3308 |
| nd      | 23.1113 | 22.5473 | 22.9248 |
| 23.9762 | 24.3186 | nd      | 24.3565 |
| 24.8579 | 24.3321 | 24.0494 | 24.5959 |
| 23.48   | 23.7907 | 23.8664 | 23.1363 |
| nd      | nd      | 22.8212 | 22.6036 |
| 25.3035 | 25.8956 | 25.3695 | 25.1147 |
| 23.8633 | 24.1966 | 24.0915 | 24.4876 |



|         |         |         |         |
|---------|---------|---------|---------|
| 21.6803 | nd      | 20.8207 | 21.1939 |
| 24.2867 | 23.8068 | 23.9192 | 24.3324 |
| nd      | 20.515  | 22.9348 | nd      |
| 28.6563 | 24.1031 | 21.7275 | 24.2532 |
| 27.9778 | 28.3618 | 28.0175 | 27.8555 |
| 25.8458 | 27.1662 | 26.3271 | 25.8868 |
| 31.6357 | 31.8898 | 31.659  | 31.7223 |
| 27.3333 | 27.7823 | 27.7257 | 27.7146 |
| nd      | nd      | 23.8674 | 25.1896 |
| 27.1031 | 27.5749 | 27.2892 | 27.7264 |
| 25.5054 | 26.9144 | 25.9419 | 26.6172 |
| 23.3738 | 23.9417 | 24.0116 | 23.9143 |
| 32.1449 | 32.2596 | 32.0907 | 32.2043 |
| 28.6954 | 28.9142 | 28.8979 | 28.8224 |
| 25.4686 | 25.7054 | 25.075  | 25.2321 |
| 26.8257 | 26.2547 | 26.6979 | 26.6108 |
| 24.7938 | 24.358  | 23.9437 | 23.6919 |
| 23.061  | 23.3438 | 22.6528 | 23.131  |
| 28.0135 | 27.9672 | 27.8647 | 28.216  |
| 22.445  | 22.7295 | 22.3996 | 23.1182 |
| 25.4434 | 25.3077 | 25.3289 | 25.6619 |
| 26.4995 | 26.5976 | 26.3534 | 26.2765 |
| 24.7263 | 24.7166 | 24.43   | 24.9409 |
| 25.058  | 25.1899 | 25.0535 | 25.101  |
| 23.1464 | 22.9691 | 23.6262 | 23.9832 |
| 25.1615 | 25.067  | 24.6596 | 25.2352 |
| 24.3564 | 24.334  | 24.2567 | 24.4593 |
| 29.5471 | 29.6635 | 29.4719 | 29.6762 |
| 23.3214 | 23.4451 | 23.0889 | 23.546  |
| 22.4926 | 22.6464 | 21.1418 | 22.2747 |
| 24.5925 | 24.8444 | 24.3202 | nd      |
| 22.1775 | nd      | nd      | 22.2601 |
| 24.9843 | 25.41   | 25.4618 | 25.0962 |
| 23.0128 | 22.9342 | 23.0044 | 23.3797 |
| 23.521  | 23.4782 | 22.9254 | 22.8402 |
| 26.9309 | 26.7556 | 26.6414 | 26.8016 |
| 27.3715 | 27.3708 | 27.2326 | 27.1624 |
| 24.8395 | 24.603  | 25.0421 | 25.1196 |
| 29.5169 | 29.6482 | 29.7322 | 28.8544 |
| 21.7711 | 22.9571 | 21.8346 | 20.9987 |
| 21.9914 | 21.5707 | nd      | 21.7689 |

|         |         |         |         |
|---------|---------|---------|---------|
| 20.1326 | 20.025  | 19.8256 | 20.6558 |
| 23.4414 | 24.1159 | 23.5909 | 24.1329 |
| 22.5025 | 22.6014 | 22.1516 | 22.412  |
| 23.6291 | 23.7315 | 23.2734 | 23.7902 |
| 22.1431 | 23.5129 | 23.6982 | 23.7041 |
| 22.948  | nd      | nd      | 22.9612 |
| 26.9717 | 27.3511 | 27.4317 | 27.2374 |
| 22.7938 | nd      | 23.1782 | 23.6    |
| 28.7859 | 26.9774 | 27.933  | 27.2647 |
| 24.9288 | 25.0357 | 24.9822 | 25.3673 |
| 24.0906 | 24.5669 | 24.8414 | 24.5378 |
| 24.9773 | 25.1033 | 24.7911 | 25.2028 |
| 25.3326 | 25.4742 | 25.2456 | 25.7664 |
| 27.0264 | 26.9601 | 26.6972 | 26.5545 |
| 25.7068 | 25.3942 | 25.3473 | 25.6855 |
| nd      | nd      | 20.9697 | 20.9621 |
| nd      | 20.6007 | 20.7429 | 20.7784 |
| 26.4328 | 26.7566 | 26.6581 | 26.6309 |
| 24.7812 | 24.8241 | 24.5275 | 24.5001 |
| 26.298  | 25.3661 | 25.465  | 25.4895 |
| 24.5572 | 23.7979 | 24.0169 | 24.5989 |
| 26.7696 | 26.3373 | 26.2343 | 26.2478 |
| 28.7381 | 27.738  | 28.0878 | 28.1528 |
| 29.3036 | 28.4915 | 28.8626 | 28.8568 |
| 27.5899 | 26.8457 | 27.1986 | 26.72   |
| 25.1977 | 24.2477 | 25.0348 | 24.5842 |
| 27.2557 | 26.559  | 26.8083 | 26.7841 |
| 22.855  | 22.4682 | 22.4567 | 22.1286 |
| 22.6095 | 22.0953 | nd      | 21.8975 |
| 24.7447 | 24.3797 | 24.4106 | 23.8968 |
| 24.4138 | 24.9794 | 24.4018 | 24.8588 |
| nd      | 20.9755 | 20.5712 | 20.3795 |
| 25.2581 | 25.1439 | 25.8191 | 25.9606 |
| 23.7293 | 24.258  | 23.235  | 23.178  |
| 26.603  | 26.5654 | 26.5882 | 26.7425 |
| 23.1227 | 23.615  | 22.4056 | 23.1206 |
| 26.7264 | 26.8913 | 26.8219 | 26.6935 |
| 20.7524 | 21.4334 | 20.7677 | 20.8759 |
| 25.074  | 25.2302 | 25.0755 | 25.1825 |
| 24.4315 | 24.4811 | 24.3018 | 24.5844 |
| 25.5107 | 26.1856 | 25.8499 | 26.1782 |

|         |         |         |         |
|---------|---------|---------|---------|
| 22.4159 | 22.3958 | 23.2508 | nd      |
| 26.869  | 26.826  | 26.6943 | 26.8105 |
| 28.0666 | 28.1942 | 28.2927 | 28.3564 |
| nd      | 21.4705 | 21.2361 | 21.0521 |
| 22.5578 | 22.9171 | 22.6798 | 23.0629 |
| 28.4939 | 28.2939 | 28.4515 | 28.5494 |
| 32.7966 | 32.6614 | 32.8095 | 32.789  |
| 29.4058 | 29.3113 | 29.4253 | 29.4809 |
| 28.4983 | 28.3662 | 28.2541 | 28.5751 |
| 27.2626 | 27.0897 | 27.0237 | 27.3684 |
| 25.2011 | 25.1897 | 24.7104 | 25.4079 |
| 34.3026 | 34.2128 | 34.394  | 34.3635 |
| nd      | nd      | 22.8678 | 22.9628 |
| 21.6072 | 21.7474 | 21.4849 | 22.0477 |
| 24.0168 | 24.0265 | 23.7389 | 24.301  |
| 22.8568 | 22.6944 | 22.8284 | 22.6666 |
| 21.4692 | 21.6048 | 22.9183 | 22.1884 |
| 25.0955 | 25.3472 | 25.2255 | 25.41   |
| 26.9251 | 27.1585 | 27.0365 | 26.9479 |
| 20.7935 | 21.5707 | 21.0139 | 20.7694 |
| nd      | 22.6309 | 22.7298 | 22.5784 |
| 21.8425 | 21.9759 | nd      | 21.8007 |
| 22.2014 | 22.3528 | 22.6414 | nd      |
| 25.157  | 25.266  | 24.9721 | 25.1737 |
| 22.1931 | 22.4413 | 22.4806 | 22.5406 |
| 26.0062 | 25.9615 | 25.9291 | 25.3685 |
| 25.024  | 26.2133 | 26.0179 | 25.904  |
| 25.4948 | 25.4229 | 25.2609 | 25.8977 |
| 26.6439 | 26.3276 | 26.9537 | 27.1006 |
| 22.1266 | 22.778  | 22.2672 | 22.0554 |
| 26.9096 | 27.1571 | 27.0596 | 26.7861 |
| 24.8527 | 24.6601 | 24.3063 | 25.3992 |
| 22.8845 | 22.1673 | 22.2822 | 22.8803 |
| 29.2552 | 29.2334 | 29.1004 | 29.1934 |
| 23.5315 | nd      | 24.0602 | 22.4413 |
| 23.3072 | 24.0186 | 23.527  | 23.6693 |
| 27.3739 | 27.548  | 27.4041 | 27.6129 |
| 26.8787 | 26.7332 | 26.7125 | 26.5696 |
| 24.7089 | 24.5936 | 24.4121 | 24.8679 |
| 25.0364 | 25.2997 | 25.2319 | 25.0511 |
| 23.9725 | 23.8015 | 24.1606 | 22.9998 |

|         |         |         |         |
|---------|---------|---------|---------|
| 25.7413 | 25.6894 | 25.4243 | 25.6824 |
| 22.9316 | nd      | 21.7187 | nd      |
| 23.52   | 24.4799 | 24.27   | 24.0074 |
| nd      | nd      | 21.8312 | 22.3955 |
| 22.1532 | 22.7283 | 22.8522 | 22.9728 |
| 22.9604 | 23.3184 | nd      | 23.0646 |
| 27.5602 | 27.5486 | 27.6921 | 27.778  |
| 28.1746 | 28.3862 | 28.1197 | 28.5519 |
| 27.8131 | 28.4438 | 28.2854 | 28.2337 |
| 25.7217 | 26.3173 | 26.0592 | 25.8486 |
| 29.0206 | 29.035  | 28.6976 | 28.9977 |
| 30.1271 | 30.1587 | 30.093  | 30.2186 |
| 24.5711 | 23.8739 | 24.5949 | 24.7077 |
| 20.4937 | 20.7466 | 20.9149 | 20.8673 |
| nd      | nd      | 19.7747 | 19.573  |
| 22.3762 | 22.7916 | 23.1303 | 22.9541 |
| 22.9304 | 22.2886 | 22.9505 | 23.1988 |
| 21.0152 | 21.1442 | nd      | 22.4157 |
| 29.9002 | 29.766  | 29.8678 | 29.3938 |

t detected.

| Peptides | Unique peptides | Sequence coverage [%] | Unique sequence coverage [%] |
|----------|-----------------|-----------------------|------------------------------|
| 35       | 35              | 36.7                  | 36.7                         |
| 5        | 5               | 8.2                   | 8.2                          |
| 1        | 1               | 2.7                   | 2.7                          |
| 4        | 4               | 12.8                  | 12.8                         |
| 2        | 2               | 1.9                   | 1.9                          |
| 4        | 4               | 3.8                   | 3.8                          |
| 3        | 3               | 6.8                   | 6.8                          |
| 3        | 3               | 11                    | 11                           |
| 1        | 1               | 1.2                   | 1.2                          |
| 3        | 3               | 25.4                  | 25.4                         |
| 6        | 6               | 21.6                  | 21.6                         |
| 4        | 4               | 25.2                  | 25.2                         |
| 6        | 5               | 11.3                  | 9.9                          |
| 3        | 3               | 17.9                  | 17.9                         |
| 3        | 3               | 9.5                   | 9.5                          |
| 1        | 1               | 2.2                   | 2.2                          |
| 4        | 4               | 77.8                  | 77.8                         |
| 5        | 5               | 22.9                  | 22.9                         |
| 28       | 28              | 83.1                  | 83.1                         |
| 39       | 36              | 24                    | 23                           |
| 3        | 3               | 3.9                   | 3.9                          |
| 2        | 2               | 5.8                   | 5.8                          |
| 21       | 21              | 45.3                  | 45.3                         |
| 14       | 14              | 43.7                  | 43.7                         |
| 12       | 12              | 47.8                  | 47.8                         |
| 6        | 6               | 18.5                  | 18.5                         |
| 38       | 38              | 74.5                  | 74.5                         |
| 20       | 20              | 11.4                  | 11.4                         |
| 15       | 15              | 55.4                  | 55.4                         |
| 7        | 7               | 29.7                  | 29.7                         |
| 31       | 31              | 38.2                  | 38.2                         |
| 3        | 3               | 8                     | 8                            |
| 33       | 33              | 40.1                  | 40.1                         |
| 17       | 17              | 32.3                  | 32.3                         |
| 44       | 44              | 65.4                  | 65.4                         |
| 2        | 2               | 7.7                   | 7.7                          |
| 3        | 3               | 36.4                  | 36.4                         |
| 8        | 4               | 29.4                  | 19.6                         |

|    |    |      |      |
|----|----|------|------|
| 2  | 2  | 6.5  | 6.5  |
| 12 | 12 | 29.6 | 29.6 |
| 3  | 3  | 20.3 | 20.3 |
| 4  | 4  | 10.1 | 10.1 |
| 1  | 1  | 3.4  | 3.4  |
| 26 | 25 | 39.9 | 38.6 |
| 8  | 7  | 17.9 | 16.5 |
| 41 | 0  | 92   | 0    |
| 37 | 1  | 92.3 | 4.5  |
| 43 | 0  | 92   | 0    |
| 37 | 1  | 92.3 | 4.5  |
| 2  | 2  | 6.1  | 6.1  |
| 73 | 44 | 78.6 | 57.6 |
| 68 | 41 | 75.3 | 53.9 |
| 2  | 2  | 9.6  | 9.6  |
| 13 | 4  | 45.5 | 18.4 |
| 13 | 4  | 45.2 | 18.1 |
| 15 | 15 | 51.8 | 51.8 |
| 16 | 16 | 63.9 | 63.9 |
| 3  | 3  | 28.3 | 28.3 |
| 1  | 1  | 1.6  | 1.6  |
| 2  | 2  | 2.2  | 2.2  |
| 8  | 8  | 17.7 | 17.7 |
| 6  | 5  | 6.7  | 5.4  |
| 2  | 1  | 3    | 1.5  |
| 8  | 8  | 25.9 | 25.9 |
| 3  | 3  | 7.7  | 7.7  |
| 6  | 6  | 21.3 | 21.3 |
| 11 | 10 | 57   | 54.3 |
| 6  | 5  | 20.6 | 17.9 |
| 3  | 3  | 13.8 | 13.8 |
| 7  | 7  | 28.8 | 28.8 |
| 2  | 2  | 8.1  | 8.1  |
| 2  | 2  | 2.9  | 2.9  |
| 1  | 1  | 3.7  | 3.7  |
| 11 | 11 | 33.9 | 33.9 |
| 2  | 2  | 7.2  | 7.2  |
| 22 | 22 | 24.1 | 24.1 |
| 3  | 2  | 4.1  | 3.1  |
| 1  | 1  | 6    | 6    |
| 2  | 2  | 4.4  | 4.4  |

|    |    |      |      |
|----|----|------|------|
| 1  | 1  | 3.5  | 3.5  |
| 1  | 1  | 14.5 | 14.5 |
| 3  | 2  | 4.7  | 2.7  |
| 3  | 3  | 18   | 18   |
| 16 | 16 | 11.9 | 11.9 |
| 12 | 12 | 37   | 37   |
| 4  | 4  | 10.8 | 10.8 |
| 2  | 2  | 8.6  | 8.6  |
| 6  | 6  | 36.2 | 36.2 |
| 4  | 4  | 9.6  | 9.6  |
| 2  | 2  | 11.5 | 11.5 |
| 5  | 5  | 20   | 20   |
| 3  | 3  | 11.6 | 11.6 |
| 6  | 6  | 17.6 | 17.6 |
| 8  | 8  | 52.1 | 52.1 |
| 9  | 9  | 56.9 | 56.9 |
| 14 | 14 | 70   | 70   |
| 4  | 4  | 3.7  | 3.7  |
| 12 | 12 | 56.9 | 56.9 |
| 12 | 12 | 46.8 | 46.8 |
| 2  | 1  | 5.7  | 3.2  |
| 4  | 3  | 18.7 | 16.1 |
| 3  | 3  | 12.5 | 12.5 |
| 1  | 1  | 4.7  | 4.7  |
| 2  | 2  | 10.9 | 10.9 |
| 49 | 46 | 77   | 74.7 |
| 6  | 6  | 16.5 | 16.5 |
| 1  | 1  | 1.6  | 1.6  |
| 1  | 1  | 1.5  | 1.5  |
| 7  | 5  | 16   | 14.2 |
| 3  | 3  | 5.1  | 5.1  |
| 27 | 25 | 68.2 | 66.7 |
| 7  | 7  | 17.6 | 17.6 |
| 6  | 6  | 17.3 | 17.3 |
| 2  | 2  | 5.5  | 5.5  |
| 19 | 19 | 50.7 | 50.7 |
| 11 | 11 | 37   | 37   |
| 9  | 9  | 30.8 | 30.8 |
| 22 | 22 | 80.8 | 80.8 |
| 1  | 1  | 3.9  | 3.9  |
| 1  | 1  | 8.1  | 8.1  |

|    |    |      |      |
|----|----|------|------|
| 3  | 3  | 29.4 | 29.4 |
| 3  | 3  | 2.4  | 2.4  |
| 25 | 24 | 24.1 | 23.4 |
| 5  | 3  | 2.3  | 1.7  |
| 2  | 2  | 4.4  | 4.4  |
| 4  | 4  | 12   | 12   |
| 5  | 5  | 7    | 7    |
| 4  | 4  | 21.1 | 21.1 |
| 2  | 2  | 11.4 | 11.4 |
| 4  | 4  | 13.3 | 13.3 |
| 28 | 28 | 37.7 | 37.7 |
| 19 | 19 | 48.8 | 48.8 |
| 15 | 15 | 32   | 32   |
| 26 | 26 | 73.2 | 73.2 |
| 16 | 16 | 56.7 | 56.7 |
| 13 | 13 | 51.1 | 51.1 |
| 25 | 25 | 73.7 | 73.7 |
| 49 | 49 | 70.9 | 70.9 |
| 10 | 10 | 22.9 | 22.9 |
| 29 | 29 | 48.4 | 48.4 |
| 2  | 2  | 3.2  | 3.2  |
| 17 | 5  | 22.5 | 9.2  |
| 3  | 3  | 5.6  | 5.6  |
| 23 | 16 | 33.3 | 23.7 |
| 23 | 16 | 35.7 | 25.9 |
| 28 | 16 | 37.2 | 23.9 |
| 10 | 10 | 29.9 | 29.9 |
| 2  | 2  | 11.3 | 11.3 |
| 5  | 5  | 5.2  | 5.2  |
| 2  | 2  | 3.3  | 3.3  |
| 3  | 3  | 7.1  | 7.1  |
| 3  | 3  | 15.8 | 15.8 |
| 3  | 3  | 7.7  | 7.7  |
| 3  | 3  | 13.7 | 13.7 |
| 17 | 17 | 61   | 61   |
| 9  | 9  | 46.5 | 46.5 |
| 2  | 2  | 32.4 | 32.4 |
| 15 | 15 | 48.9 | 48.9 |
| 1  | 1  | 10.2 | 10.2 |
| 1  | 1  | 21.6 | 21.6 |
| 5  | 5  | 18.6 | 18.6 |



|    |    |      |      |
|----|----|------|------|
| 11 | 11 | 36.5 | 36.5 |
| 2  | 2  | 19.5 | 19.5 |
| 4  | 4  | 27.9 | 27.9 |
| 11 | 11 | 16.9 | 16.9 |
| 7  | 7  | 15.7 | 15.7 |
| 3  | 3  | 25.6 | 25.6 |
| 3  | 3  | 23   | 23   |
| 9  | 9  | 22.9 | 22.9 |
| 9  | 4  | 68.5 | 39.8 |
| 5  | 1  | 47   | 9.9  |
| 6  | 3  | 52.8 | 23.9 |
| 6  | 2  | 42.8 | 13.9 |
| 2  | 2  | 21.7 | 21.7 |
| 3  | 3  | 2.5  | 2.5  |
| 11 | 11 | 44   | 44   |
| 3  | 3  | 8    | 8    |
| 2  | 2  | 1.4  | 1.4  |
| 11 | 11 | 74   | 74   |
| 2  | 2  | 23.5 | 23.5 |
| 5  | 5  | 7.4  | 7.4  |
| 3  | 3  | 7.1  | 7.1  |
| 2  | 2  | 13.8 | 13.8 |
| 4  | 4  | 35.2 | 35.2 |
| 1  | 1  | 4.9  | 4.9  |
| 6  | 6  | 28.7 | 28.7 |
| 5  | 5  | 30.1 | 30.1 |
| 3  | 3  | 27   | 27   |
| 11 | 10 | 37.9 | 31.7 |
| 14 | 14 | 42   | 42   |
| 9  | 9  | 53.9 | 53.9 |
| 9  | 9  | 66.7 | 66.7 |
| 3  | 3  | 29.1 | 29.1 |
| 2  | 2  | 16.3 | 16.3 |
| 5  | 5  | 19.8 | 19.8 |
| 5  | 5  | 19.2 | 19.2 |
| 5  | 5  | 17.5 | 17.5 |
| 11 | 11 | 19.3 | 19.3 |
| 19 | 19 | 54.2 | 54.2 |
| 1  | 1  | 3.1  | 3.1  |
| 2  | 2  | 4.3  | 4.3  |
| 1  | 1  | 6.9  | 6.9  |

|    |    |      |      |
|----|----|------|------|
| 2  | 2  | 4.9  | 4.9  |
| 18 | 18 | 48.8 | 48.8 |
| 2  | 2  | 4.1  | 4.1  |
| 15 | 15 | 46.8 | 46.8 |
| 5  | 5  | 58.8 | 58.8 |
| 20 | 12 | 23.5 | 14.8 |
| 13 | 4  | 16.7 | 5.9  |
| 3  | 3  | 12.5 | 12.5 |
| 8  | 8  | 39.6 | 39.6 |
| 19 | 13 | 28.2 | 18.6 |
| 7  | 4  | 11.1 | 6.3  |
| 4  | 1  | 4.7  | 1.1  |
| 12 | 9  | 14   | 10.1 |
| 28 | 28 | 61.7 | 61.7 |
| 27 | 27 | 73.5 | 73.5 |
| 10 | 10 | 42.6 | 42.6 |
| 7  | 7  | 22.7 | 22.7 |
| 8  | 8  | 76.4 | 76.4 |
| 2  | 2  | 33.8 | 33.8 |
| 1  | 1  | 9.3  | 9.3  |
| 3  | 3  | 36.4 | 36.4 |
| 3  | 3  | 41.7 | 41.7 |
| 10 | 10 | 62.4 | 62.4 |
| 1  | 1  | 1.2  | 1.2  |
| 2  | 2  | 6.6  | 6.6  |
| 9  | 9  | 23.8 | 23.8 |
| 1  | 1  | 4.3  | 4.3  |
| 3  | 3  | 19.5 | 19.5 |
| 3  | 3  | 12   | 12   |
| 3  | 3  | 9.6  | 9.6  |
| 3  | 3  | 4.5  | 4.5  |
| 3  | 3  | 40.3 | 40.3 |
| 1  | 1  | 2.7  | 2.7  |
| 9  | 9  | 26.3 | 26.3 |
| 1  | 1  | 2.7  | 2.7  |
| 4  | 4  | 5.1  | 5.1  |
| 5  | 5  | 62.9 | 62.9 |
| 1  | 1  | 6.8  | 6.8  |
| 17 | 17 | 46   | 46   |
| 1  | 1  | 3    | 3    |
| 1  | 1  | 1.8  | 1.8  |

|    |    |      |      |
|----|----|------|------|
| 9  | 9  | 32.1 | 32.1 |
| 3  | 3  | 12.2 | 12.2 |
| 3  | 3  | 18   | 18   |
| 1  | 1  | 4.1  | 4.1  |
| 20 | 19 | 61.8 | 59.6 |
| 7  | 7  | 26.4 | 26.4 |
| 5  | 5  | 25.8 | 25.8 |
| 8  | 8  | 58.3 | 58.3 |
| 1  | 1  | 4.6  | 4.6  |
| 4  | 4  | 19.6 | 19.6 |
| 9  | 9  | 36.7 | 36.7 |
| 1  | 1  | 5.7  | 5.7  |
| 2  | 2  | 39.8 | 39.8 |
| 1  | 1  | 14.2 | 14.2 |
| 1  | 1  | 1.7  | 1.7  |
| 1  | 1  | 1.1  | 1.1  |
| 4  | 4  | 25.5 | 25.5 |
| 33 | 33 | 29.7 | 29.7 |
| 13 | 13 | 16.1 | 16.1 |
| 3  | 3  | 9.2  | 9.2  |
| 3  | 3  | 2.9  | 2.9  |
| 2  | 2  | 4.2  | 4.2  |
| 3  | 3  | 11.9 | 11.9 |
| 13 | 13 | 68.1 | 68.1 |
| 17 | 17 | 84.6 | 84.6 |
| 10 | 8  | 31.1 | 26.7 |
| 19 | 19 | 25.4 | 25.4 |
| 2  | 2  | 12.7 | 12.7 |
| 4  | 4  | 1.6  | 1.6  |
| 6  | 6  | 49.7 | 49.7 |
| 12 | 12 | 45.4 | 45.4 |
| 3  | 3  | 11.7 | 11.7 |
| 3  | 3  | 8.6  | 8.6  |
| 13 | 9  | 40.2 | 27.2 |
| 12 | 5  | 33.3 | 16.4 |
| 1  | 1  | 6.8  | 6.8  |
| 27 | 27 | 35.8 | 35.8 |
| 11 | 11 | 33.5 | 33.5 |
| 26 | 25 | 75.9 | 74.3 |
| 10 | 9  | 31.3 | 29.6 |
| 4  | 4  | 22.7 | 22.7 |

|    |    |      |      |
|----|----|------|------|
| 8  | 8  | 18   | 18   |
| 21 | 21 | 40   | 40   |
| 9  | 9  | 47.2 | 47.2 |
| 3  | 3  | 8.3  | 8.3  |
| 5  | 3  | 24.8 | 18.9 |
| 7  | 5  | 33.9 | 28   |
| 10 | 10 | 49.3 | 49.3 |
| 3  | 3  | 43.2 | 43.2 |
| 8  | 1  | 35.8 | 3.1  |
| 8  | 1  | 38.9 | 3    |
| 1  | 1  | 3.1  | 3.1  |
| 1  | 1  | 2.9  | 2.9  |
| 1  | 1  | 2.9  | 2.9  |
| 3  | 3  | 14.3 | 14.3 |
| 3  | 3  | 6.8  | 6.8  |
| 10 | 10 | 27.7 | 27.7 |
| 9  | 9  | 57.9 | 57.9 |
| 4  | 4  | 37   | 37   |
| 9  | 8  | 37.5 | 34.7 |
| 15 | 15 | 73.4 | 73.4 |
| 5  | 4  | 18.8 | 15.9 |
| 2  | 2  | 3.4  | 3.4  |
| 1  | 1  | 1.5  | 1.5  |
| 2  | 2  | 6    | 6    |
| 1  | 1  | 9.8  | 9.8  |
| 5  | 5  | 13.8 | 13.8 |
| 4  | 4  | 5.7  | 5.7  |
| 2  | 2  | 16.4 | 16.4 |
| 1  | 1  | 4.7  | 4.7  |
| 22 | 22 | 56.4 | 56.4 |
| 15 | 15 | 36.5 | 36.5 |
| 12 | 12 | 35.6 | 35.6 |
| 15 | 15 | 53.6 | 53.6 |
| 15 | 15 | 39.4 | 39.4 |
| 17 | 17 | 39.3 | 39.3 |
| 14 | 14 | 24.8 | 24.8 |
| 11 | 11 | 13   | 13   |
| 3  | 3  | 13.4 | 13.4 |
| 2  | 2  | 2.7  | 2.7  |
| 7  | 7  | 25.5 | 25.5 |
| 4  | 4  | 6    | 6    |

|    |    |      |      |
|----|----|------|------|
| 2  | 2  | 8.6  | 8.6  |
| 12 | 12 | 33.5 | 33.5 |
| 1  | 1  | 3.3  | 3.3  |
| 1  | 1  | 4.6  | 4.6  |
| 3  | 3  | 27.5 | 27.5 |
| 2  | 2  | 11.5 | 11.5 |
| 5  | 5  | 11.3 | 11.3 |
| 2  | 2  | 27.4 | 27.4 |
| 4  | 4  | 13.2 | 13.2 |
| 8  | 7  | 57.1 | 51.3 |
| 6  | 5  | 6.5  | 6    |
| 14 | 14 | 23.4 | 23.4 |
| 2  | 2  | 2.4  | 2.4  |
| 1  | 1  | 6.1  | 6.1  |
| 3  | 2  | 3.1  | 2.5  |
| 3  | 2  | 9.2  | 6.5  |
| 4  | 4  | 14.6 | 14.6 |
| 6  | 5  | 13.7 | 11.7 |
| 4  | 4  | 23.4 | 23.4 |
| 15 | 12 | 39.2 | 33.8 |
| 22 | 19 | 55.9 | 50.6 |
| 5  | 5  | 9.3  | 9.3  |
| 1  | 1  | 10.1 | 10.1 |
| 19 | 19 | 21.4 | 21.4 |
| 3  | 3  | 9.8  | 9.8  |
| 15 | 13 | 74.1 | 63.3 |
| 7  | 5  | 52.4 | 41.6 |
| 3  | 3  | 21.6 | 21.6 |
| 2  | 2  | 10.6 | 10.6 |
| 7  | 4  | 4.5  | 2.9  |
| 1  | 1  | 5.4  | 5.4  |
| 2  | 2  | 15.6 | 15.6 |
| 1  | 1  | 4.1  | 4.1  |
| 3  | 3  | 18.3 | 18.3 |
| 3  | 3  | 30.6 | 30.6 |
| 13 | 13 | 28   | 28   |
| 17 | 16 | 61.7 | 59.6 |
| 13 | 12 | 44.4 | 42.3 |
| 5  | 5  | 5.2  | 5.2  |
| 1  | 1  | 4.5  | 4.5  |
| 1  | 1  | 3.3  | 3.3  |

|    |    |      |      |
|----|----|------|------|
| 6  | 6  | 53.5 | 53.5 |
| 11 | 11 | 47.7 | 47.7 |
| 14 | 14 | 70   | 70   |
| 1  | 1  | 2.2  | 2.2  |
| 1  | 1  | 3    | 3    |
| 2  | 2  | 9.5  | 9.5  |
| 70 | 70 | 55.5 | 55.5 |
| 9  | 9  | 23.2 | 23.2 |
| 5  | 5  | 23.1 | 23.1 |
| 7  | 7  | 36.8 | 36.8 |
| 7  | 7  | 36.2 | 36.2 |
| 1  | 1  | 8.8  | 8.8  |
| 10 | 10 | 31.8 | 31.8 |
| 25 | 25 | 76.8 | 76.8 |
| 9  | 8  | 36.1 | 32.5 |
| 14 | 13 | 57   | 53.6 |
| 8  | 8  | 23.2 | 23.2 |
| 2  | 2  | 11   | 11   |
| 1  | 1  | 4.9  | 4.9  |
| 1  | 1  | 9.3  | 9.3  |
| 3  | 3  | 9.1  | 9.1  |
| 10 | 10 | 8.1  | 8.1  |
| 46 | 46 | 39.6 | 39.6 |
| 19 | 19 | 19.5 | 19.5 |
| 26 | 26 | 20.1 | 20.1 |
| 15 | 15 | 11.7 | 11.7 |
| 21 | 21 | 20   | 20   |
| 4  | 3  | 3.9  | 3    |
| 5  | 2  | 4.3  | 2    |
| 9  | 9  | 7.5  | 7.5  |
| 15 | 15 | 14.8 | 14.8 |
| 3  | 3  | 3.5  | 3.5  |
| 1  | 1  | 2.1  | 2.1  |
| 7  | 7  | 6    | 6    |
| 5  | 5  | 6.3  | 6.3  |
| 46 | 46 | 51.9 | 51.9 |
| 42 | 42 | 40.1 | 40.1 |
| 20 | 12 | 10.8 | 7.2  |
| 53 | 45 | 33.6 | 29.4 |
| 4  | 4  | 7.6  | 7.6  |
| 3  | 3  | 24.6 | 24.6 |

|    |    |      |      |
|----|----|------|------|
| 1  | 1  | 7.5  | 7.5  |
| 2  | 2  | 13.6 | 13.6 |
| 7  | 7  | 44.1 | 44.1 |
| 1  | 1  | 6.1  | 6.1  |
| 23 | 23 | 28.9 | 28.9 |
| 13 | 13 | 22.7 | 22.7 |
| 7  | 7  | 9.6  | 9.6  |
| 6  | 6  | 43.8 | 43.8 |
| 13 | 11 | 24.5 | 21.2 |
| 5  | 3  | 7.4  | 6    |
| 6  | 6  | 19.4 | 19.4 |
| 5  | 5  | 18   | 18   |
| 5  | 5  | 19.5 | 19.5 |
| 2  | 2  | 6.9  | 6.9  |
| 2  | 2  | 7.1  | 7.1  |
| 4  | 4  | 21.1 | 21.1 |
| 2  | 2  | 20.9 | 20.9 |
| 1  | 1  | 5.3  | 5.3  |
| 7  | 7  | 18.5 | 18.5 |
| 3  | 3  | 12.1 | 12.1 |
| 5  | 5  | 16.3 | 16.3 |
| 7  | 7  | 17.4 | 17.4 |
| 14 | 14 | 37.8 | 37.8 |
| 1  | 1  | 11.3 | 11.3 |
| 5  | 5  | 36.1 | 36.1 |
| 7  | 7  | 54.8 | 54.8 |
| 7  | 7  | 51.6 | 51.6 |
| 4  | 4  | 61.3 | 61.3 |
| 8  | 8  | 70.9 | 70.9 |
| 4  | 4  | 59.2 | 59.2 |
| 1  | 1  | 16.2 | 16.2 |
| 3  | 3  | 56.6 | 56.6 |
| 1  | 1  | 14.3 | 14.3 |
| 10 | 10 | 14.8 | 14.8 |
| 12 | 12 | 31.9 | 31.9 |
| 4  | 4  | 10.5 | 10.5 |
| 8  | 8  | 20.1 | 20.1 |
| 3  | 2  | 10.6 | 8.9  |
| 7  | 6  | 18.4 | 18.4 |
| 1  | 1  | 2.9  | 2.9  |
| 2  | 2  | 10.9 | 10.9 |

|    |    |      |      |
|----|----|------|------|
| 3  | 3  | 12.3 | 12.3 |
| 2  | 2  | 7.4  | 7.4  |
| 1  | 1  | 10.5 | 10.5 |
| 4  | 4  | 6.7  | 6.7  |
| 7  | 7  | 11.7 | 11.7 |
| 18 | 18 | 33.3 | 33.3 |
| 1  | 1  | 2.3  | 2.3  |
| 14 | 14 | 31.2 | 31.2 |
| 1  | 1  | 3.8  | 3.8  |
| 4  | 4  | 71.4 | 71.4 |
| 8  | 8  | 71.2 | 71.2 |
| 6  | 6  | 29.6 | 29.6 |
| 1  | 1  | 5    | 5    |
| 5  | 5  | 30.9 | 30.9 |
| 6  | 6  | 26.6 | 26.6 |
| 2  | 2  | 10   | 10   |
| 18 | 18 | 50   | 50   |
| 9  | 9  | 29   | 29   |
| 8  | 8  | 14.3 | 14.3 |
| 3  | 3  | 8.9  | 8.9  |
| 4  | 4  | 13.2 | 13.2 |
| 6  | 6  | 21.5 | 21.5 |
| 1  | 1  | 7.9  | 7.9  |
| 46 | 46 | 29.2 | 29.2 |
| 12 | 12 | 64.8 | 64.8 |
| 13 | 13 | 67.4 | 67.4 |
| 1  | 1  | 9.3  | 9.3  |
| 3  | 3  | 33.7 | 33.7 |
| 2  | 2  | 9.1  | 9.1  |
| 6  | 6  | 19.1 | 19.1 |
| 1  | 1  | 2.4  | 2.4  |
| 9  | 7  | 16   | 13.4 |
| 2  | 1  | 3.4  | 2    |
| 3  | 2  | 6.9  | 5.7  |
| 2  | 2  | 5.2  | 5.2  |
| 9  | 7  | 17.4 | 15.1 |
| 2  | 2  | 3.6  | 3.6  |
| 9  | 9  | 14.1 | 14.1 |
| 6  | 6  | 25.4 | 25.4 |
| 11 | 11 | 37.1 | 37.1 |
| 2  | 2  | 11.1 | 11.1 |



|    |    |      |      |
|----|----|------|------|
| 6  | 6  | 11.2 | 11.2 |
| 1  | 1  | 3.1  | 3.1  |
| 4  | 4  | 5.5  | 5.5  |
| 3  | 3  | 4.2  | 4.2  |
| 2  | 2  | 3.2  | 3.2  |
| 3  | 3  | 5    | 5    |
| 3  | 3  | 18.6 | 18.6 |
| 1  | 1  | 8.1  | 8.1  |
| 1  | 1  | 15.7 | 15.7 |
| 4  | 4  | 32.1 | 32.1 |
| 2  | 2  | 32.2 | 32.2 |
| 4  | 4  | 27.9 | 27.9 |
| 18 | 18 | 83.5 | 83.5 |
| 1  | 1  | 5.3  | 5.3  |
| 9  | 9  | 58.6 | 58.6 |
| 9  | 5  | 63.8 | 39   |
| 13 | 13 | 13   | 13   |
| 5  | 5  | 37.9 | 37.9 |
| 2  | 2  | 7.4  | 7.4  |
| 2  | 2  | 3.5  | 3.5  |
| 2  | 2  | 5.9  | 5.9  |
| 8  | 8  | 53.8 | 53.8 |
| 3  | 3  | 4.9  | 4.9  |
| 2  | 2  | 5.1  | 5.1  |
| 12 | 12 | 17.1 | 17.1 |
| 3  | 3  | 8.7  | 8.7  |
| 8  | 8  | 19.8 | 19.8 |
| 3  | 3  | 14.6 | 14.6 |
| 2  | 2  | 39.1 | 39.1 |
| 6  | 6  | 22.2 | 22.2 |
| 12 | 12 | 26.1 | 26.1 |
| 19 | 18 | 53.4 | 51.1 |
| 5  | 5  | 20.7 | 20.7 |
| 10 | 10 | 13.6 | 13.6 |
| 11 | 11 | 35.1 | 35.1 |
| 1  | 1  | 8.6  | 8.6  |
| 1  | 1  | 5.5  | 5.5  |
| 1  | 1  | 7.4  | 7.4  |
| 9  | 9  | 43.9 | 43.9 |
| 7  | 7  | 8.6  | 8.6  |
| 1  | 1  | 3.3  | 3.3  |

|    |    |      |      |
|----|----|------|------|
| 8  | 8  | 30.2 | 30.2 |
| 1  | 1  | 5.4  | 5.4  |
| 9  | 9  | 95.8 | 95.8 |
| 9  | 9  | 16.5 | 16.5 |
| 12 | 6  | 22.9 | 12.5 |
| 3  | 3  | 3.9  | 3.9  |
| 1  | 1  | 3    | 3    |
| 9  | 9  | 27.8 | 27.8 |
| 11 | 3  | 23.1 | 7.7  |
| 11 | 3  | 22.2 | 6.7  |
| 2  | 2  | 2.7  | 2.7  |
| 1  | 1  | 1    | 1    |
| 14 | 8  | 30.1 | 19.1 |
| 2  | 2  | 5.3  | 5.3  |
| 3  | 3  | 7.5  | 7.5  |
| 14 | 14 | 55.2 | 55.2 |
| 4  | 4  | 8.7  | 8.7  |
| 2  | 2  | 7.6  | 7.6  |
| 21 | 16 | 54.2 | 47.8 |
| 5  | 5  | 22.8 | 22.8 |
| 5  | 5  | 24.6 | 24.6 |
| 2  | 2  | 8    | 8    |
| 3  | 3  | 4.5  | 4.5  |
| 2  | 2  | 2.1  | 2.1  |
| 11 | 11 | 10.9 | 10.9 |
| 5  | 5  | 5.9  | 5.9  |
| 2  | 2  | 6.7  | 6.7  |
| 20 | 20 | 37.7 | 37.7 |
| 11 | 11 | 31   | 31   |
| 10 | 10 | 31.5 | 31.5 |
| 93 | 93 | 35.7 | 35.7 |
| 4  | 4  | 11.9 | 11.9 |
| 2  | 2  | 9.3  | 9.3  |
| 2  | 2  | 9.2  | 9.2  |
| 1  | 1  | 5.4  | 5.4  |
| 7  | 7  | 28.5 | 28.5 |
| 2  | 2  | 2.4  | 2.4  |
| 2  | 2  | 5.5  | 5.5  |
| 1  | 1  | 16.4 | 16.4 |
| 3  | 3  | 10.3 | 10.3 |
| 5  | 0  | 6.2  | 0    |

|     |     |      |      |
|-----|-----|------|------|
| 22  | 22  | 45.4 | 45.4 |
| 15  | 10  | 22.4 | 15.8 |
| 11  | 11  | 33.4 | 33.4 |
| 5   | 5   | 3.6  | 3.6  |
| 17  | 17  | 60.7 | 60.7 |
| 7   | 7   | 21.3 | 21.3 |
| 1   | 1   | 2    | 2    |
| 7   | 7   | 39.8 | 39.8 |
| 3   | 3   | 45.5 | 45.5 |
| 27  | 23  | 65.9 | 56.1 |
| 25  | 21  | 62.8 | 54   |
| 2   | 2   | 10.7 | 10.7 |
| 8   | 8   | 4.3  | 4.3  |
| 5   | 5   | 0.9  | 0.9  |
| 18  | 17  | 81.8 | 77.6 |
| 1   | 1   | 13.3 | 13.3 |
| 11  | 11  | 27.6 | 27.6 |
| 1   | 1   | 5.5  | 5.5  |
| 5   | 5   | 38.9 | 38.9 |
| 106 | 106 | 30.9 | 30.9 |
| 1   | 1   | 5.6  | 5.6  |
| 7   | 7   | 22.2 | 22.2 |
| 3   | 3   | 27   | 27   |
| 2   | 2   | 38.5 | 38.5 |
| 1   | 1   | 15.9 | 15.9 |
| 2   | 2   | 49.1 | 49.1 |
| 15  | 15  | 12.3 | 12.3 |
| 8   | 8   | 36.1 | 36.1 |
| 1   | 1   | 7.2  | 7.2  |
| 10  | 10  | 51   | 51   |
| 14  | 14  | 59.5 | 59.5 |
| 5   | 5   | 16.8 | 16.8 |
| 7   | 7   | 17.5 | 17.5 |
| 5   | 5   | 4.3  | 4.3  |
| 1   | 1   | 3.2  | 3.2  |
| 25  | 15  | 65.4 | 42.2 |
| 4   | 4   | 30.7 | 30.7 |
| 6   | 6   | 33.8 | 33.8 |
| 2   | 2   | 17.8 | 17.8 |
| 12  | 12  | 39.6 | 39.6 |
| 39  | 38  | 56.3 | 55.1 |

|    |    |      |      |
|----|----|------|------|
| 11 | 11 | 30   | 30   |
| 9  | 9  | 29.8 | 29.8 |
| 6  | 4  | 29.6 | 20.8 |
| 5  | 3  | 19.2 | 10.4 |
| 3  | 3  | 5    | 5    |
| 9  | 8  | 12.6 | 11.5 |
| 5  | 5  | 5.8  | 5.8  |
| 3  | 3  | 7.2  | 7.2  |
| 25 | 15 | 60.7 | 40.6 |
| 41 | 37 | 78.8 | 74   |
| 14 | 3  | 32.5 | 10.7 |
| 26 | 18 | 58.6 | 46.8 |
| 6  | 6  | 25.4 | 25.4 |
| 4  | 4  | 11   | 11   |
| 14 | 14 | 11.7 | 11.7 |
| 4  | 4  | 7.2  | 7.2  |
| 8  | 8  | 12   | 12   |
| 4  | 4  | 12.2 | 12.2 |
| 9  | 9  | 26.1 | 26.1 |
| 7  | 7  | 31.9 | 31.9 |
| 2  | 2  | 7.2  | 7.2  |
| 2  | 2  | 8    | 8    |
| 2  | 2  | 10   | 10   |
| 1  | 1  | 7.6  | 7.6  |
| 6  | 6  | 14.4 | 14.4 |
| 3  | 3  | 13.6 | 13.6 |
| 13 | 6  | 41.1 | 24.1 |
| 9  | 2  | 28.3 | 11.3 |
| 4  | 2  | 15.1 | 9.2  |
| 5  | 5  | 13.9 | 13.9 |
| 3  | 3  | 12.9 | 12.9 |
| 6  | 5  | 5    | 4.6  |
| 9  | 9  | 13.7 | 13.7 |
| 4  | 4  | 38.6 | 38.6 |
| 5  | 5  | 14.5 | 14.5 |
| 9  | 9  | 83.8 | 83.8 |
| 2  | 2  | 3.5  | 3.5  |
| 7  | 7  | 26.4 | 26.4 |
| 16 | 16 | 44.7 | 44.7 |
| 1  | 1  | 4.7  | 4.7  |
| 4  | 4  | 7.2  | 7.2  |

|    |    |      |      |
|----|----|------|------|
| 2  | 2  | 12.6 | 12.6 |
| 5  | 5  | 38.6 | 38.6 |
| 27 | 27 | 36.5 | 36.5 |
| 10 | 9  | 18.5 | 17.5 |
| 12 | 12 | 27.9 | 27.9 |
| 10 | 10 | 28.2 | 28.2 |
| 8  | 8  | 28.1 | 28.1 |
| 24 | 19 | 74.2 | 55.3 |
| 5  | 1  | 19.4 | 3.7  |
| 8  | 4  | 30.9 | 15   |
| 17 | 17 | 21.8 | 21.8 |
| 5  | 5  | 8.7  | 8.7  |
| 6  | 6  | 10.6 | 10.6 |
| 1  | 1  | 2.4  | 2.4  |
| 8  | 8  | 26.7 | 26.7 |
| 12 | 12 | 31.1 | 31.1 |
| 5  | 3  | 7.6  | 5.3  |
| 5  | 4  | 6.8  | 5.8  |
| 22 | 22 | 60.4 | 60.4 |
| 5  | 5  | 17.3 | 17.3 |
| 1  | 1  | 1.7  | 1.7  |
| 1  | 1  | 2.9  | 2.9  |
| 1  | 1  | 1.6  | 1.6  |
| 5  | 3  | 5.8  | 4.9  |
| 18 | 18 | 16.3 | 16.3 |
| 2  | 2  | 3.2  | 3.2  |
| 2  | 2  | 3.3  | 3.3  |
| 4  | 4  | 4.6  | 4.6  |
| 1  | 1  | 0.9  | 0.9  |
| 3  | 3  | 15.9 | 15.9 |
| 1  | 1  | 10.6 | 10.6 |
| 3  | 3  | 8.6  | 8.6  |
| 4  | 4  | 22.1 | 22.1 |
| 8  | 8  | 33.5 | 33.5 |
| 9  | 9  | 62.4 | 62.4 |
| 26 | 26 | 32.6 | 32.6 |
| 16 | 16 | 29.5 | 29.5 |
| 2  | 2  | 5.3  | 5.3  |
| 16 | 16 | 62.8 | 62.8 |
| 11 | 11 | 58.8 | 58.8 |
| 10 | 10 | 21.1 | 21.1 |

|     |     |      |      |
|-----|-----|------|------|
| 6   | 6   | 42.5 | 42.5 |
| 1   | 1   | 1.1  | 1.1  |
| 2   | 2   | 3.8  | 3.8  |
| 13  | 13  | 23.5 | 23.5 |
| 7   | 7   | 17.2 | 17.2 |
| 3   | 3   | 24.1 | 24.1 |
| 12  | 12  | 75.8 | 75.8 |
| 4   | 4   | 13.9 | 13.9 |
| 10  | 10  | 43.7 | 43.7 |
| 6   | 6   | 9.5  | 9.5  |
| 5   | 5   | 7.6  | 7.6  |
| 27  | 27  | 40.3 | 40.3 |
| 9   | 9   | 19.2 | 19.2 |
| 2   | 2   | 12.3 | 12.3 |
| 2   | 2   | 5.3  | 5.3  |
| 2   | 2   | 11   | 11   |
| 2   | 2   | 12.8 | 12.8 |
| 1   | 1   | 2.7  | 2.7  |
| 1   | 1   | 3.3  | 3.3  |
| 1   | 1   | 2.8  | 2.8  |
| 7   | 7   | 18.9 | 18.9 |
| 6   | 6   | 12.6 | 12.6 |
| 101 | 101 | 59.3 | 59.3 |
| 2   | 2   | 18.6 | 18.6 |
| 3   | 3   | 13.5 | 13.5 |
| 20  | 20  | 65.6 | 65.6 |
| 3   | 2   | 6.4  | 5    |
| 2   | 1   | 4.4  | 2.9  |
| 12  | 12  | 11.9 | 11.9 |
| 18  | 18  | 42.2 | 42.2 |
| 103 | 99  | 44.1 | 43.3 |
| 6   | 2   | 2.2  | 1.2  |
| 1   | 1   | 4.7  | 4.7  |
| 5   | 5   | 8.7  | 8.7  |
| 2   | 2   | 6.8  | 6.8  |
| 2   | 2   | 9    | 9    |
| 2   | 2   | 4.1  | 4.1  |
| 2   | 2   | 12.7 | 12.7 |
| 2   | 2   | 7.6  | 7.6  |
| 24  | 24  | 44.7 | 44.7 |
| 3   | 3   | 7.2  | 7.2  |

|     |     |      |      |
|-----|-----|------|------|
| 2   | 2   | 11.6 | 11.6 |
| 22  | 22  | 49.2 | 49.2 |
| 32  | 32  | 68.2 | 68.2 |
| 2   | 2   | 15.5 | 15.5 |
| 21  | 21  | 57.6 | 57.6 |
| 1   | 1   | 4.4  | 4.4  |
| 17  | 17  | 57.4 | 57.4 |
| 23  | 23  | 69.6 | 69.6 |
| 7   | 7   | 35.3 | 35.3 |
| 8   | 8   | 12.2 | 12.2 |
| 4   | 4   | 27.6 | 27.6 |
| 2   | 2   | 5.3  | 5.3  |
| 5   | 5   | 71.3 | 71.3 |
| 1   | 1   | 8.6  | 8.6  |
| 2   | 2   | 11.2 | 11.2 |
| 4   | 4   | 12   | 12   |
| 4   | 4   | 12.5 | 12.5 |
| 17  | 17  | 18.6 | 18.6 |
| 162 | 152 | 74.8 | 73.7 |
| 41  | 31  | 24.3 | 21.5 |
| 70  | 57  | 37   | 33.9 |
| 7   | 7   | 24.5 | 24.5 |
| 6   | 6   | 23.7 | 23.7 |
| 2   | 2   | 3.4  | 3.4  |
| 10  | 10  | 28.2 | 28.2 |
| 24  | 24  | 60.4 | 60.4 |
| 7   | 7   | 16.7 | 16.7 |
| 7   | 7   | 29.3 | 29.3 |
| 1   | 1   | 3.4  | 3.4  |
| 87  | 87  | 51.7 | 51.7 |
| 4   | 4   | 15.4 | 15.4 |
| 3   | 2   | 3.9  | 2.4  |
| 3   | 3   | 1    | 1    |
| 3   | 3   | 11.4 | 11.4 |
| 9   | 9   | 57.7 | 57.7 |
| 9   | 9   | 50.8 | 50.8 |
| 1   | 1   | 7.3  | 7.3  |
| 2   | 2   | 21.8 | 21.8 |
| 3   | 3   | 7.9  | 7.9  |
| 2   | 2   | 6.5  | 6.5  |
| 6   | 5   | 16.3 | 13.8 |

|    |    |      |      |
|----|----|------|------|
| 4  | 3  | 16.3 | 13.6 |
| 14 | 14 | 37.7 | 37.7 |
| 2  | 2  | 3.1  | 3.1  |
| 1  | 1  | 14.5 | 14.5 |
| 1  | 1  | 1.8  | 1.8  |
| 7  | 7  | 30.4 | 30.4 |
| 1  | 1  | 4.7  | 4.7  |
| 4  | 4  | 20.8 | 20.8 |
| 22 | 22 | 34.3 | 34.3 |
| 22 | 22 | 69.1 | 69.1 |
| 3  | 3  | 4.5  | 4.5  |
| 5  | 5  | 10.5 | 10.5 |
| 4  | 4  | 25.3 | 25.3 |
| 3  | 3  | 8.8  | 8.8  |
| 5  | 5  | 12.9 | 12.9 |
| 15 | 15 | 42.9 | 42.9 |
| 1  | 1  | 4.3  | 4.3  |
| 2  | 2  | 4.8  | 4.8  |
| 11 | 11 | 6.5  | 6.5  |
| 4  | 4  | 14.1 | 14.1 |
| 18 | 15 | 53   | 44.7 |
| 24 | 21 | 66.5 | 58.2 |
| 2  | 2  | 3.7  | 3.7  |
| 1  | 1  | 10.5 | 10.5 |
| 1  | 1  | 9.1  | 9.1  |
| 2  | 1  | 2.9  | 1.8  |
| 2  | 1  | 3.7  | 2.5  |
| 12 | 12 | 12.2 | 12.2 |
| 9  | 9  | 54.9 | 54.9 |
| 6  | 6  | 25.8 | 25.8 |
| 3  | 3  | 23.4 | 23.4 |
| 6  | 6  | 30.3 | 30.3 |
| 10 | 10 | 25.9 | 25.9 |
| 2  | 2  | 12.4 | 12.4 |
| 23 | 23 | 55   | 55   |
| 7  | 7  | 30   | 30   |
| 3  | 3  | 9    | 9    |
| 2  | 2  | 23.9 | 23.9 |
| 3  | 3  | 8.8  | 8.8  |
| 4  | 4  | 13.6 | 13.6 |
| 2  | 2  | 8.1  | 8.1  |



|    |    |      |      |
|----|----|------|------|
| 7  | 2  | 22.8 | 8.4  |
| 3  | 3  | 9    | 9    |
| 9  | 1  | 27.4 | 4.2  |
| 16 | 8  | 54.6 | 31.5 |
| 8  | 2  | 30.8 | 8.8  |
| 9  | 0  | 28.5 | 0    |
| 9  | 5  | 31.5 | 18.7 |
| 9  | 8  | 30   | 27.1 |
| 13 | 7  | 50.9 | 29.7 |
| 15 | 7  | 60.9 | 31.8 |
| 11 | 11 | 50.5 | 50.5 |
| 7  | 3  | 28.5 | 14.4 |
| 3  | 3  | 56.9 | 56.9 |
| 1  | 1  | 39.7 | 39.7 |
| 2  | 2  | 8.8  | 8.8  |
| 1  | 1  | 6    | 6    |
| 2  | 2  | 2.6  | 2.6  |
| 2  | 2  | 11.2 | 11.2 |
| 2  | 2  | 18.4 | 18.4 |
| 6  | 6  | 20.6 | 20.6 |
| 21 | 21 | 60.2 | 60.2 |
| 3  | 3  | 11.3 | 11.3 |
| 3  | 2  | 8.3  | 5.2  |
| 12 | 11 | 35.9 | 32.8 |
| 24 | 23 | 66.2 | 63   |
| 6  | 5  | 25.3 | 21.9 |
| 28 | 28 | 53.8 | 53.8 |
| 22 | 22 | 50.9 | 50.9 |
| 1  | 1  | 3.5  | 3.5  |
| 3  | 3  | 9.3  | 9.3  |
| 13 | 13 | 74.6 | 74.6 |
| 7  | 7  | 32.3 | 32.3 |
| 1  | 1  | 6.5  | 6.5  |
| 1  | 1  | 9.1  | 9.1  |
| 7  | 7  | 35.5 | 35.5 |
| 9  | 9  | 36.9 | 36.9 |
| 4  | 4  | 10.5 | 10.5 |
| 3  | 3  | 14.3 | 14.3 |
| 1  | 1  | 3.5  | 3.5  |
| 1  | 1  | 6.9  | 6.9  |
| 26 | 2  | 54.6 | 2.3  |

|    |    |      |      |
|----|----|------|------|
| 25 | 1  | 57   | 1.2  |
| 6  | 6  | 21.9 | 21.9 |
| 3  | 3  | 7.2  | 7.2  |
| 1  | 1  | 5.4  | 5.4  |
| 8  | 8  | 48.2 | 48.2 |
| 22 | 13 | 81.2 | 45   |
| 20 | 13 | 81.2 | 57.8 |
| 5  | 4  | 28.6 | 24.6 |
| 9  | 2  | 44   | 12.8 |
| 3  | 3  | 16.7 | 16.7 |
| 11 | 11 | 63.3 | 63.3 |
| 13 | 13 | 64.6 | 64.6 |
| 4  | 3  | 23.8 | 20.9 |
| 8  | 7  | 53.5 | 50.6 |
| 6  | 6  | 41.7 | 41.7 |
| 3  | 3  | 6.8  | 6.8  |
| 19 | 19 | 38.5 | 38.5 |
| 13 | 13 | 25.5 | 25.5 |
| 4  | 4  | 24.7 | 24.7 |
| 5  | 5  | 30.6 | 30.6 |
| 1  | 1  | 3.3  | 3.3  |
| 6  | 6  | 27.8 | 27.8 |
| 2  | 2  | 14.5 | 14.5 |
| 6  | 4  | 20.7 | 14.1 |
| 5  | 4  | 19   | 16.3 |
| 5  | 3  | 22.5 | 15.1 |
| 6  | 4  | 53.9 | 46.9 |
| 10 | 8  | 40.7 | 33.6 |
| 6  | 4  | 19.1 | 12.1 |
| 5  | 1  | 45.6 | 23.5 |
| 7  | 7  | 13.2 | 13.2 |
| 10 | 10 | 62.4 | 62.4 |
| 40 | 40 | 62.9 | 62.9 |
| 30 | 30 | 67.6 | 67.6 |
| 2  | 2  | 8.8  | 8.8  |
| 1  | 1  | 14.5 | 14.5 |
| 7  | 7  | 22.8 | 22.8 |
| 4  | 4  | 13.9 | 13.9 |
| 1  | 1  | 6.1  | 6.1  |
| 9  | 7  | 71.8 | 65.5 |
| 15 | 9  | 70.7 | 58.5 |

|    |    |      |      |
|----|----|------|------|
| 8  | 2  | 57.1 | 21.8 |
| 1  | 1  | 6.8  | 6.8  |
| 4  | 4  | 3.8  | 3.8  |
| 2  | 1  | 4.5  | 1.8  |
| 2  | 1  | 10.5 | 7.2  |
| 4  | 3  | 27.7 | 23.8 |
| 5  | 5  | 35.1 | 35.1 |
| 9  | 9  | 11.4 | 11.4 |
| 1  | 1  | 0.6  | 0.6  |
| 4  | 4  | 9.8  | 9.8  |
| 1  | 1  | 1.9  | 1.9  |
| 2  | 2  | 4.4  | 4.4  |
| 10 | 10 | 40.3 | 40.3 |
| 11 | 11 | 39.5 | 39.5 |
| 1  | 1  | 23.2 | 23.2 |
| 7  | 7  | 72.2 | 72.2 |
| 4  | 4  | 39.9 | 39.9 |
| 11 | 11 | 16   | 16   |
| 5  | 2  | 24.9 | 19.2 |
| 5  | 4  | 14.3 | 10.3 |
| 13 | 4  | 37.3 | 14.2 |
| 10 | 1  | 29.4 | 7.2  |
| 10 | 3  | 29.7 | 13.2 |
| 7  | 3  | 57.7 | 36.2 |
| 8  | 8  | 49.2 | 49.2 |
| 5  | 1  | 45.6 | 23.5 |
| 5  | 1  | 45.6 | 23.5 |
| 13 | 13 | 58.3 | 58.3 |
| 3  | 1  | 34.6 | 5.4  |
| 7  | 2  | 58.1 | 14   |
| 22 | 18 | 27.2 | 24   |
| 14 | 10 | 15.7 | 12.4 |
| 2  | 2  | 11.3 | 11.3 |
| 7  | 6  | 39.1 | 33.5 |
| 2  | 1  | 13.3 | 7.6  |
| 5  | 5  | 28.3 | 28.3 |
| 3  | 3  | 10.8 | 10.8 |
| 1  | 1  | 14.4 | 14.4 |
| 2  | 2  | 5.7  | 5.7  |
| 3  | 3  | 17.8 | 17.8 |
| 2  | 2  | 9.2  | 9.2  |

|    |    |      |      |
|----|----|------|------|
| 5  | 5  | 27.2 | 27.2 |
| 16 | 16 | 57.8 | 57.8 |
| 15 | 15 | 45.1 | 45.1 |
| 7  | 7  | 24.6 | 24.6 |
| 5  | 5  | 18.2 | 18.2 |
| 8  | 7  | 23.7 | 20.9 |
| 3  | 2  | 18.3 | 15.6 |
| 6  | 4  | 27.2 | 20.7 |
| 9  | 3  | 28.3 | 10.2 |
| 6  | 1  | 18   | 3.8  |
| 11 | 11 | 35.4 | 35.4 |
| 9  | 9  | 30.4 | 30.4 |
| 3  | 3  | 8.1  | 8.1  |
| 13 | 13 | 25.9 | 25.9 |
| 21 | 21 | 35.2 | 35.2 |
| 4  | 4  | 7.8  | 7.8  |
| 9  | 9  | 15.2 | 15.2 |
| 4  | 4  | 5.7  | 5.7  |
| 1  | 1  | 2.8  | 2.8  |
| 2  | 2  | 8.4  | 8.4  |
| 14 | 14 | 29.4 | 29.4 |
| 2  | 2  | 10.4 | 10.4 |
| 4  | 4  | 18.8 | 18.8 |
| 16 | 16 | 49.1 | 49.1 |
| 7  | 7  | 18.7 | 18.7 |
| 1  | 1  | 25   | 25   |
| 2  | 2  | 6.5  | 6.5  |
| 9  | 9  | 41   | 41   |
| 8  | 8  | 40.9 | 40.9 |
| 5  | 5  | 20.5 | 20.5 |
| 4  | 4  | 7.6  | 7.6  |
| 6  | 6  | 19.2 | 19.2 |
| 24 | 18 | 36.4 | 26.7 |
| 33 | 25 | 46.8 | 35.1 |
| 33 | 31 | 41.3 | 39.5 |
| 7  | 5  | 10.4 | 8.4  |
| 10 | 8  | 18.7 | 16.8 |
| 25 | 1  | 49.3 | 4.2  |
| 25 | 1  | 49.4 | 4.4  |
| 24 | 12 | 42.8 | 28   |
| 24 | 21 | 37.5 | 32.9 |

|     |     |      |      |
|-----|-----|------|------|
| 5   | 3   | 9.3  | 5.6  |
| 29  | 27  | 49   | 47.3 |
| 27  | 17  | 44.1 | 32.5 |
| 18  | 18  | 31.8 | 31.8 |
| 16  | 16  | 80.4 | 80.4 |
| 6   | 6   | 53.1 | 53.1 |
| 5   | 5   | 53.8 | 53.8 |
| 3   | 3   | 18.9 | 18.9 |
| 29  | 29  | 61.8 | 61.8 |
| 6   | 6   | 49   | 49   |
| 136 | 136 | 50.6 | 50.6 |
| 12  | 10  | 22.2 | 19.5 |
| 13  | 13  | 31.7 | 31.7 |
| 8   | 8   | 3.6  | 3.6  |
| 13  | 13  | 20.3 | 20.3 |
| 2   | 2   | 18.5 | 18.5 |
| 2   | 2   | 1.2  | 1.2  |
| 12  | 12  | 20.1 | 20.1 |
| 6   | 5   | 15.6 | 14.4 |
| 2   | 2   | 4.3  | 4.3  |
| 1   | 1   | 2.5  | 2.5  |
| 3   | 3   | 5.8  | 5.8  |
| 13  | 12  | 34.1 | 31.9 |
| 17  | 16  | 39.8 | 39.8 |
| 16  | 16  | 44.8 | 44.8 |
| 11  | 11  | 43   | 43   |
| 2   | 2   | 11.5 | 11.5 |
| 1   | 1   | 3.8  | 3.8  |
| 1   | 1   | 3.2  | 3.2  |
| 1   | 1   | 6.3  | 6.3  |
| 9   | 9   | 42.7 | 42.7 |
| 4   | 4   | 15.2 | 15.2 |
| 1   | 1   | 3.1  | 3.1  |
| 10  | 10  | 28.4 | 28.4 |
| 4   | 4   | 53.3 | 53.3 |
| 4   | 3   | 19   | 15   |
| 3   | 2   | 16.2 | 11.9 |
| 1   | 1   | 2.1  | 2.1  |
| 3   | 3   | 13.1 | 13.1 |
| 4   | 4   | 6.6  | 6.6  |
| 18  | 18  | 54.2 | 54.2 |

|    |    |      |      |
|----|----|------|------|
| 2  | 2  | 9.7  | 9.7  |
| 23 | 23 | 37.9 | 37.9 |
| 6  | 6  | 18.8 | 18.8 |
| 3  | 3  | 4.3  | 4.3  |
| 7  | 7  | 51.5 | 51.5 |
| 3  | 3  | 8.6  | 8.6  |
| 3  | 3  | 5.1  | 5.1  |
| 1  | 1  | 1.6  | 1.6  |
| 2  | 2  | 2.6  | 2.6  |
| 15 | 15 | 20.7 | 20.7 |
| 8  | 8  | 11.5 | 11.5 |
| 2  | 2  | 4.4  | 4.4  |
| 46 | 46 | 39.7 | 39.7 |
| 2  | 2  | 3.7  | 3.7  |
| 2  | 2  | 11.8 | 11.8 |
| 7  | 7  | 20.8 | 20.8 |
| 1  | 1  | 4.7  | 4.7  |
| 6  | 6  | 54.9 | 54.9 |
| 5  | 5  | 14.5 | 14.5 |
| 1  | 1  | 1.2  | 1.2  |
| 4  | 4  | 5.3  | 5.3  |
| 11 | 11 | 18.4 | 18.4 |
| 11 | 11 | 15.4 | 15.4 |
| 11 | 11 | 14.2 | 14.2 |
| 3  | 3  | 3    | 3    |
| 33 | 33 | 43.8 | 43.8 |
| 5  | 5  | 11.8 | 11.8 |
| 17 | 17 | 20.1 | 20.1 |
| 28 | 28 | 41.6 | 41.6 |
| 8  | 8  | 15.1 | 15.1 |
| 8  | 8  | 16   | 16   |
| 1  | 1  | 1.1  | 1.1  |
| 10 | 10 | 20   | 20   |
| 7  | 7  | 10.7 | 10.7 |
| 10 | 10 | 12.2 | 12.2 |
| 1  | 1  | 3.8  | 3.8  |
| 5  | 5  | 38.9 | 38.9 |
| 20 | 15 | 9.8  | 8.3  |
| 6  | 2  | 2.2  | 1    |
| 7  | 7  | 34.4 | 34.4 |
| 2  | 2  | 3.6  | 3.6  |

|    |    |      |      |
|----|----|------|------|
| 3  | 3  | 7    | 7    |
| 4  | 2  | 7.5  | 5.1  |
| 16 | 16 | 30.7 | 30.7 |
| 8  | 8  | 18.7 | 18.7 |
| 1  | 1  | 2.9  | 2.9  |
| 2  | 2  | 10.5 | 10.5 |
| 1  | 1  | 10.4 | 10.4 |
| 6  | 6  | 16.9 | 16.9 |
| 1  | 1  | 1.9  | 1.9  |
| 2  | 2  | 9.3  | 9.3  |
| 4  | 4  | 8.8  | 8.8  |
| 8  | 8  | 13.4 | 13.4 |
| 2  | 2  | 2.4  | 2.4  |
| 3  | 2  | 2.2  | 1.7  |
| 1  | 1  | 2.7  | 2.7  |
| 4  | 1  | 4.5  | 0.9  |
| 9  | 6  | 13.2 | 9.3  |
| 6  | 5  | 16.8 | 13.5 |
| 7  | 4  | 46.4 | 28.1 |
| 3  | 3  | 1    | 1    |
| 7  | 7  | 23.8 | 23.8 |
| 5  | 5  | 19.6 | 19.6 |
| 5  | 2  | 14.6 | 7.3  |
| 24 | 24 | 45.7 | 45.7 |
| 4  | 4  | 34   | 34   |
| 17 | 2  | 53.5 | 7.7  |
| 26 | 4  | 55.1 | 7.3  |
| 22 | 3  | 48.3 | 8.3  |
| 16 | 3  | 33.3 | 6.9  |
| 2  | 2  | 12.6 | 12.6 |
| 4  | 4  | 59.3 | 59.3 |
| 2  | 2  | 48.3 | 48.3 |
| 2  | 2  | 66.1 | 66.1 |
| 1  | 1  | 17.3 | 17.3 |
| 4  | 4  | 98.9 | 98.9 |
| 2  | 2  | 13.1 | 13.1 |
| 2  | 2  | 3.4  | 3.4  |
| 1  | 1  | 4.8  | 4.8  |
| 2  | 2  | 6.6  | 6.6  |
| 22 | 22 | 10.7 | 10.7 |
| 25 | 25 | 18.9 | 18.9 |

|    |    |      |      |
|----|----|------|------|
| 70 | 70 | 30.4 | 30.4 |
| 5  | 5  | 3.5  | 3.5  |
| 74 | 74 | 52.1 | 52.1 |
| 47 | 47 | 39.4 | 39.4 |
| 2  | 2  | 6.4  | 6.4  |
| 3  | 3  | 6.5  | 6.5  |
| 3  | 3  | 23.6 | 23.6 |
| 1  | 1  | 22   | 22   |
| 2  | 2  | 10.9 | 10.9 |
| 9  | 9  | 28.5 | 28.5 |
| 1  | 1  | 0.8  | 0.8  |
| 6  | 5  | 25.9 | 22.1 |
| 12 | 7  | 28.1 | 19.5 |
| 20 | 20 | 43.7 | 43.7 |
| 22 | 20 | 75.3 | 69   |
| 16 | 15 | 60.2 | 56.6 |
| 1  | 1  | 3.3  | 3.3  |
| 5  | 5  | 12.5 | 12.5 |
| 2  | 2  | 4.8  | 4.8  |
| 12 | 12 | 30.4 | 30.4 |
| 8  | 8  | 39.1 | 39.1 |
| 11 | 11 | 86.7 | 86.7 |
| 6  | 6  | 27.3 | 27.3 |
| 1  | 1  | 3.3  | 3.3  |
| 2  | 2  | 7.1  | 7.1  |
| 2  | 2  | 4.6  | 4.6  |
| 3  | 3  | 4.6  | 4.6  |
| 14 | 9  | 55.7 | 40.6 |
| 13 | 8  | 47.8 | 33.4 |
| 2  | 2  | 8.6  | 8.6  |
| 13 | 13 | 29.9 | 29.9 |
| 3  | 3  | 12.2 | 12.2 |
| 4  | 4  | 11.7 | 11.7 |
| 19 | 19 | 54.2 | 54.2 |
| 1  | 1  | 2.8  | 2.8  |
| 44 | 44 | 62.4 | 62.4 |
| 17 | 16 | 27.9 | 25.9 |
| 8  | 7  | 16.1 | 14.1 |
| 17 | 17 | 29.7 | 29.7 |
| 6  | 6  | 6.1  | 6.1  |
| 12 | 12 | 16.6 | 16.6 |



|    |    |      |      |
|----|----|------|------|
| 7  | 7  | 30.4 | 30.4 |
| 19 | 19 | 47.8 | 47.8 |
| 4  | 4  | 6.4  | 6.4  |
| 1  | 1  | 3.6  | 3.6  |
| 35 | 35 | 61.8 | 61.8 |
| 37 | 37 | 11.4 | 11.4 |
| 3  | 3  | 9.2  | 9.2  |
| 18 | 18 | 19   | 19   |
| 8  | 8  | 25.1 | 25.1 |
| 1  | 1  | 2.1  | 2.1  |
| 3  | 3  | 7.8  | 7.8  |
| 1  | 1  | 2.7  | 2.7  |
| 6  | 6  | 29.6 | 29.6 |
| 3  | 3  | 10.2 | 10.2 |
| 1  | 1  | 7.8  | 7.8  |
| 1  | 1  | 20.9 | 20.9 |
| 1  | 1  | 24.3 | 24.3 |
| 13 | 13 | 31.3 | 31.3 |
| 21 | 21 | 21.8 | 21.8 |
| 3  | 3  | 2    | 2    |
| 4  | 4  | 5    | 5    |
| 51 | 51 | 40.6 | 40.6 |
| 1  | 1  | 3.4  | 3.4  |
| 1  | 1  | 3.2  | 3.2  |
| 16 | 10 | 42.9 | 29.9 |
| 3  | 3  | 17.6 | 17.6 |
| 1  | 1  | 15.7 | 15.7 |
| 1  | 1  | 13.7 | 13.7 |
| 7  | 7  | 63.8 | 63.8 |
| 4  | 4  | 33.3 | 33.3 |
| 1  | 1  | 10.5 | 10.5 |
| 3  | 3  | 19.4 | 19.4 |
| 5  | 5  | 1.1  | 1.1  |
| 5  | 5  | 30.7 | 30.7 |
| 6  | 6  | 8.1  | 8.1  |
| 1  | 1  | 9.5  | 9.5  |
| 2  | 2  | 6.5  | 6.5  |
| 10 | 10 | 31.9 | 31.9 |
| 14 | 12 | 6.2  | 5.3  |
| 20 | 18 | 13.1 | 12.2 |
| 2  | 1  | 17.4 | 11.6 |

|    |    |      |      |
|----|----|------|------|
| 2  | 1  | 16.8 | 11.2 |
| 2  | 2  | 2.6  | 2.6  |
| 7  | 7  | 26.7 | 26.7 |
| 2  | 2  | 9.9  | 9.9  |
| 2  | 2  | 8.1  | 8.1  |
| 1  | 1  | 0.5  | 0.5  |
| 16 | 16 | 23.8 | 23.8 |
| 2  | 2  | 11.4 | 11.4 |
| 6  | 6  | 8.2  | 8.2  |
| 12 | 9  | 54.5 | 41.6 |
| 2  | 2  | 15.5 | 15.5 |
| 8  | 5  | 34.2 | 22.1 |
| 8  | 8  | 42.2 | 42.2 |
| 3  | 3  | 10.7 | 10.7 |
| 2  | 2  | 13.2 | 13.2 |
| 3  | 3  | 5.1  | 5.1  |
| 1  | 1  | 4    | 4    |
| 2  | 2  | 6.6  | 6.6  |
| 10 | 10 | 21.2 | 21.2 |
| 5  | 5  | 21.7 | 21.7 |
| 6  | 6  | 52.6 | 52.6 |
| 1  | 1  | 5.6  | 5.6  |
| 4  | 4  | 16.3 | 16.3 |
| 1  | 1  | 4.1  | 4.1  |
| 4  | 1  | 11.4 | 3.2  |
| 1  | 1  | 4.7  | 4.7  |
| 8  | 8  | 41.5 | 41.5 |
| 14 | 14 | 32.2 | 32.2 |
| 8  | 8  | 16.2 | 16.2 |
| 9  | 9  | 19.9 | 19.9 |
| 2  | 2  | 27   | 27   |
| 1  | 1  | 4.8  | 4.8  |
| 2  | 2  | 57.1 | 57.1 |
| 8  | 8  | 37.4 | 37.4 |
| 3  | 3  | 20.4 | 20.4 |
| 11 | 11 | 44   | 44   |
| 17 | 17 | 63.6 | 63.6 |
| 3  | 3  | 36.6 | 36.6 |
| 18 | 18 | 59.3 | 59.3 |
| 7  | 7  | 19.2 | 19.2 |
| 12 | 12 | 56.3 | 56.3 |

|    |    |      |      |
|----|----|------|------|
| 1  | 1  | 1.1  | 1.1  |
| 4  | 4  | 20.5 | 20.5 |
| 1  | 1  | 3.6  | 3.6  |
| 3  | 3  | 20.8 | 20.8 |
| 8  | 8  | 50.2 | 50.2 |
| 5  | 5  | 30.5 | 30.5 |
| 24 | 24 | 55.4 | 55.4 |
| 2  | 2  | 6    | 6    |
| 10 | 10 | 49.5 | 49.5 |
| 2  | 2  | 23.1 | 23.1 |
| 4  | 4  | 40   | 40   |
| 2  | 2  | 24.8 | 24.8 |
| 9  | 9  | 12.1 | 12.1 |
| 3  | 3  | 4.3  | 4.3  |
| 3  | 3  | 8.2  | 8.2  |
| 5  | 5  | 71.3 | 71.3 |
| 1  | 1  | 42.1 | 42.1 |
| 1  | 1  | 5.5  | 5.5  |
| 3  | 3  | 9.9  | 9.9  |
| 1  | 1  | 16   | 16   |
| 2  | 2  | 3.4  | 3.4  |
| 1  | 1  | 2.4  | 2.4  |
| 3  | 3  | 5.8  | 5.8  |
| 1  | 1  | 13.8 | 13.8 |
| 5  | 5  | 54.1 | 54.1 |
| 6  | 6  | 37   | 37   |
| 5  | 5  | 17.8 | 17.8 |
| 2  | 2  | 8.4  | 8.4  |
| 7  | 7  | 24.6 | 24.6 |
| 10 | 10 | 10.7 | 10.7 |
| 4  | 4  | 3.9  | 3.9  |
| 2  | 2  | 9.6  | 9.6  |
| 1  | 1  | 7.6  | 7.6  |
| 1  | 1  | 6    | 6    |
| 3  | 3  | 56.9 | 56.9 |
| 4  | 4  | 6.1  | 6.1  |
| 35 | 24 | 54.9 | 42.6 |
| 3  | 3  | 20.7 | 20.7 |
| 5  | 5  | 34.4 | 34.4 |
| 9  | 9  | 47   | 47   |
| 6  | 6  | 26.6 | 26.6 |

|     |    |      |      |
|-----|----|------|------|
| 1   | 1  | 14.9 | 14.9 |
| 10  | 10 | 44.9 | 44.9 |
| 7   | 7  | 44.9 | 44.9 |
| 3   | 3  | 15.6 | 15.6 |
| 9   | 9  | 14.3 | 14.3 |
| 5   | 5  | 6.6  | 6.6  |
| 1   | 1  | 4.4  | 4.4  |
| 2   | 2  | 5.4  | 5.4  |
| 4   | 4  | 2    | 2    |
| 6   | 6  | 64.4 | 64.4 |
| 2   | 2  | 9.5  | 9.5  |
| 4   | 4  | 26.6 | 26.6 |
| 27  | 17 | 28   | 19.7 |
| 1   | 1  | 8.8  | 8.8  |
| 5   | 5  | 9.4  | 9.4  |
| 13  | 13 | 25.2 | 25.2 |
| 4   | 4  | 13.4 | 13.4 |
| 10  | 10 | 10.4 | 10.4 |
| 1   | 1  | 19.4 | 19.4 |
| 1   | 1  | 6    | 6    |
| 2   | 2  | 5.3  | 5.3  |
| 85  | 57 | 45.3 | 34.1 |
| 160 | 4  | 61.3 | 0.6  |
| 157 | 1  | 62.3 | 0.6  |
| 15  | 2  | 6.3  | 1.3  |
| 85  | 18 | 46.8 | 11   |
| 75  | 50 | 39.9 | 29.4 |
| 13  | 13 | 75.5 | 75.5 |
| 11  | 4  | 51.2 | 18   |
| 11  | 1  | 78.1 | 17.9 |
| 11  | 1  | 78.1 | 17.9 |
| 13  | 6  | 80.2 | 47.1 |
| 38  | 11 | 40.9 | 12.5 |
| 2   | 2  | 1.9  | 1.9  |
| 1   | 1  | 2.4  | 2.4  |
| 46  | 45 | 47.1 | 46.5 |
| 12  | 12 | 15.9 | 15.9 |
| 2   | 2  | 1.4  | 1.4  |
| 23  | 23 | 14.6 | 14.6 |
| 1   | 1  | 16.4 | 16.4 |
| 1   | 1  | 7.7  | 7.7  |

|    |    |      |      |
|----|----|------|------|
| 4  | 4  | 12.2 | 12.2 |
| 2  | 2  | 14.8 | 14.8 |
| 7  | 7  | 40.1 | 40.1 |
| 4  | 4  | 16.3 | 16.3 |
| 3  | 3  | 6.2  | 6.2  |
| 4  | 4  | 19   | 19   |
| 2  | 2  | 13.6 | 13.6 |
| 1  | 1  | 1.3  | 1.3  |
| 8  | 7  | 15.4 | 13.9 |
| 3  | 3  | 19.1 | 19.1 |
| 2  | 2  | 3.7  | 3.7  |
| 4  | 4  | 14.7 | 14.7 |
| 6  | 6  | 20.8 | 20.8 |
| 5  | 5  | 14.8 | 14.8 |
| 6  | 6  | 24   | 24   |
| 3  | 3  | 13.6 | 13.6 |
| 3  | 3  | 10.9 | 10.9 |
| 3  | 3  | 9.9  | 9.9  |
| 3  | 3  | 5.4  | 5.4  |
| 2  | 2  | 10.4 | 10.4 |
| 6  | 6  | 12.1 | 12.1 |
| 1  | 1  | 6.9  | 6.9  |
| 10 | 10 | 17.2 | 17.2 |
| 8  | 8  | 13.7 | 13.7 |
| 2  | 2  | 3.7  | 3.7  |
| 6  | 6  | 31.5 | 31.5 |
| 10 | 10 | 51.3 | 51.3 |
| 1  | 1  | 14.3 | 14.3 |
| 12 | 12 | 51.5 | 51.5 |
| 2  | 2  | 24.1 | 24.1 |
| 7  | 7  | 52.4 | 52.4 |
| 3  | 3  | 23.6 | 23.6 |
| 3  | 3  | 25.3 | 25.3 |
| 3  | 3  | 50   | 50   |
| 5  | 5  | 68.3 | 68.3 |
| 4  | 4  | 50.9 | 50.9 |
| 4  | 4  | 33.6 | 33.6 |
| 7  | 7  | 57   | 57   |
| 13 | 13 | 48.5 | 48.5 |
| 1  | 1  | 8.1  | 8.1  |
| 1  | 1  | 6.5  | 6.5  |

|    |    |      |      |
|----|----|------|------|
| 2  | 2  | 47.4 | 47.4 |
| 4  | 4  | 30.1 | 30.1 |
| 3  | 3  | 33.7 | 33.7 |
| 4  | 4  | 38.8 | 38.8 |
| 3  | 3  | 16.9 | 16.9 |
| 3  | 3  | 32   | 32   |
| 3  | 3  | 14.6 | 14.6 |
| 6  | 6  | 31.3 | 31.3 |
| 6  | 6  | 50.8 | 50.8 |
| 24 | 24 | 45.9 | 45.9 |
| 10 | 10 | 24.8 | 24.8 |
| 12 | 12 | 42.6 | 42.6 |
| 3  | 3  | 29.7 | 29.7 |
| 4  | 4  | 41.5 | 41.5 |
| 5  | 5  | 60.3 | 60.3 |
| 3  | 3  | 26.8 | 26.8 |
| 3  | 3  | 17.9 | 17.9 |
| 12 | 12 | 39.7 | 39.7 |
| 5  | 5  | 27.4 | 27.4 |
| 2  | 2  | 27.9 | 27.9 |
| 5  | 4  | 29.3 | 25.6 |
| 14 | 11 | 19.5 | 16.2 |
| 1  | 1  | 17.3 | 17.3 |
| 11 | 9  | 15.1 | 13.7 |
| 1  | 1  | 1.7  | 1.7  |
| 5  | 5  | 4.1  | 4.1  |
| 1  | 1  | 1.6  | 1.6  |
| 1  | 1  | 2.6  | 2.6  |
| 2  | 2  | 6.5  | 6.5  |
| 2  | 2  | 12.8 | 12.8 |
| 2  | 2  | 9.4  | 9.4  |
| 5  | 5  | 12.1 | 12.1 |
| 4  | 4  | 50   | 50   |
| 28 | 27 | 33.3 | 32.5 |
| 14 | 13 | 12.9 | 12.2 |
| 2  | 2  | 8    | 8    |
| 1  | 1  | 13.2 | 13.2 |
| 6  | 6  | 32.4 | 32.4 |
| 6  | 6  | 33.3 | 33.3 |
| 4  | 4  | 8.6  | 8.6  |
| 9  | 4  | 66.4 | 35.5 |

|    |    |      |      |
|----|----|------|------|
| 10 | 5  | 73.7 | 42.8 |
| 3  | 3  | 23.1 | 23.1 |
| 2  | 2  | 10   | 10   |
| 3  | 3  | 11.3 | 11.3 |
| 23 | 23 | 28.4 | 28.4 |
| 7  | 7  | 25.8 | 25.8 |
| 4  | 4  | 12.3 | 12.3 |
| 1  | 1  | 0.7  | 0.7  |
| 4  | 4  | 20.1 | 20.1 |
| 1  | 1  | 6.1  | 6.1  |
| 12 | 12 | 23.2 | 23.2 |
| 5  | 5  | 29.8 | 29.8 |
| 20 | 1  | 41.2 | 2.5  |
| 21 | 2  | 41.1 | 3.4  |
| 4  | 4  | 17.7 | 17.7 |
| 6  | 6  | 31   | 31   |
| 3  | 3  | 18.2 | 18.2 |
| 8  | 8  | 15.9 | 15.9 |
| 4  | 4  | 15.4 | 15.4 |
| 4  | 4  | 36.5 | 36.5 |
| 3  | 3  | 6.2  | 6.2  |
| 8  | 8  | 16.6 | 16.6 |
| 5  | 5  | 16.6 | 16.6 |
| 2  | 2  | 6    | 6    |
| 2  | 2  | 9    | 9    |
| 1  | 1  | 9.1  | 9.1  |
| 3  | 3  | 12.3 | 12.3 |
| 1  | 1  | 5    | 5    |
| 5  | 5  | 33.5 | 33.5 |
| 1  | 1  | 2.2  | 2.2  |
| 1  | 1  | 5.8  | 5.8  |
| 6  | 6  | 5.6  | 5.6  |
| 3  | 3  | 4.6  | 4.6  |
| 3  | 3  | 3.6  | 3.6  |
| 1  | 1  | 2.1  | 2.1  |
| 5  | 5  | 9.5  | 9.5  |
| 5  | 5  | 70.9 | 70.9 |
| 1  | 1  | 0.9  | 0.9  |
| 16 | 16 | 64.7 | 64.7 |
| 3  | 3  | 22.2 | 22.2 |
| 50 | 50 | 52.9 | 52.9 |

|    |    |      |      |
|----|----|------|------|
| 15 | 15 | 43   | 43   |
| 8  | 8  | 27.5 | 27.5 |
| 1  | 1  | 4    | 4    |
| 12 | 12 | 20   | 20   |
| 2  | 2  | 11.6 | 11.6 |
| 3  | 3  | 8    | 8    |
| 3  | 3  | 4.9  | 4.9  |
| 2  | 2  | 5.1  | 5.1  |
| 2  | 2  | 3.1  | 3.1  |
| 1  | 1  | 5.7  | 5.7  |
| 1  | 1  | 8.1  | 8.1  |
| 6  | 6  | 29.3 | 29.3 |
| 7  | 7  | 28   | 28   |
| 20 | 20 | 59   | 59   |
| 3  | 3  | 5.1  | 5.1  |
| 24 | 24 | 49.3 | 49.3 |
| 5  | 5  | 19.7 | 19.7 |
| 10 | 10 | 20.3 | 20.3 |
| 1  | 1  | 5.5  | 5.5  |
| 4  | 4  | 10.3 | 10.3 |
| 6  | 6  | 16.8 | 16.8 |
| 4  | 4  | 31.4 | 31.4 |
| 6  | 6  | 20   | 20   |
| 6  | 6  | 19.8 | 19.8 |
| 10 | 10 | 22.9 | 22.9 |
| 1  | 1  | 2.6  | 2.6  |
| 1  | 1  | 3.2  | 3.2  |
| 2  | 2  | 4.1  | 4.1  |
| 3  | 3  | 10.5 | 10.5 |
| 13 | 13 | 84.1 | 84.1 |
| 2  | 2  | 3.9  | 3.9  |
| 4  | 4  | 17.6 | 17.6 |
| 13 | 13 | 42.7 | 42.7 |
| 2  | 2  | 9.3  | 9.3  |
| 4  | 4  | 27   | 27   |
| 1  | 1  | 1.2  | 1.2  |
| 9  | 9  | 20.6 | 20.6 |
| 20 | 20 | 25.1 | 25.1 |
| 9  | 8  | 42.7 | 42.7 |
| 5  | 4  | 22.4 | 22.4 |
| 12 | 12 | 19.3 | 19.3 |



|    |    |      |      |
|----|----|------|------|
| 11 | 11 | 27.9 | 27.9 |
| 12 | 11 | 30.5 | 29.2 |
| 8  | 8  | 61.2 | 61.2 |
| 5  | 5  | 17.9 | 17.9 |
| 4  | 4  | 11.5 | 11.5 |
| 2  | 2  | 5.1  | 5.1  |
| 2  | 2  | 6.5  | 6.5  |
| 3  | 3  | 23.1 | 23.1 |
| 4  | 4  | 37.3 | 37.3 |
| 7  | 7  | 55.6 | 55.6 |
| 24 | 24 | 37.9 | 37.9 |
| 2  | 2  | 15.5 | 15.5 |
| 8  | 8  | 10.3 | 10.3 |
| 1  | 1  | 2.4  | 2.4  |
| 6  | 6  | 8.7  | 8.7  |
| 17 | 17 | 50.5 | 50.5 |
| 15 | 15 | 64.6 | 64.6 |
| 3  | 3  | 8.4  | 8.4  |
| 29 | 29 | 54.5 | 54.5 |
| 14 | 14 | 25.1 | 25.1 |
| 3  | 3  | 10.8 | 10.8 |
| 9  | 9  | 29.3 | 29.3 |
| 1  | 1  | 5.5  | 5.5  |
| 2  | 2  | 11.3 | 11.3 |
| 2  | 2  | 6.7  | 6.7  |
| 21 | 21 | 83.5 | 83.5 |
| 19 | 19 | 80.4 | 80.4 |
| 10 | 10 | 45.5 | 45.5 |
| 15 | 15 | 32.7 | 32.7 |
| 22 | 22 | 71.1 | 71.1 |
| 1  | 1  | 1.7  | 1.7  |
| 3  | 2  | 4.1  | 3.2  |
| 4  | 3  | 4.6  | 3.7  |
| 1  | 1  | 8.7  | 8.7  |
| 2  | 2  | 4.9  | 4.9  |
| 6  | 6  | 38.8 | 38.8 |
| 3  | 3  | 36.9 | 36.9 |
| 11 | 11 | 89.3 | 89.3 |
| 3  | 3  | 11.3 | 11.3 |
| 5  | 5  | 29.5 | 29.5 |
| 1  | 1  | 2    | 2    |

|    |    |      |      |
|----|----|------|------|
| 1  | 1  | 14.5 | 14.5 |
| 1  | 1  | 2.2  | 2.2  |
| 3  | 3  | 28.6 | 28.6 |
| 2  | 2  | 16.9 | 16.9 |
| 3  | 3  | 33.1 | 33.1 |
| 2  | 2  | 26.8 | 26.8 |
| 13 | 9  | 27.2 | 21   |
| 12 | 9  | 22.8 | 19.1 |
| 15 | 13 | 25.8 | 22.2 |
| 15 | 7  | 95.7 | 59.3 |
| 14 | 11 | 71.3 | 63.4 |
| 16 | 16 | 53.2 | 53.2 |
| 21 | 21 | 65.9 | 65.9 |
| 11 | 11 | 83.7 | 83.7 |
| 13 | 13 | 42   | 42   |
| 1  | 1  | 2.9  | 2.9  |
| 3  | 3  | 7.7  | 7.7  |
| 27 | 27 | 63.5 | 63.5 |
| 4  | 4  | 18.1 | 18.1 |
| 7  | 6  | 41   | 36.4 |
| 2  | 1  | 10.6 | 6.5  |
| 11 | 11 | 64   | 64   |
| 8  | 8  | 32.8 | 32.8 |
| 2  | 2  | 4.7  | 4.7  |
| 1  | 1  | 4.5  | 4.5  |
| 10 | 10 | 51.9 | 51.9 |
| 3  | 3  | 2.5  | 2.5  |
| 14 | 14 | 31.3 | 31.3 |
| 2  | 2  | 7.9  | 7.9  |
| 2  | 2  | 4.4  | 4.4  |
| 1  | 1  | 9.1  | 9.1  |
| 1  | 1  | 2.2  | 2.2  |
| 1  | 1  | 4.1  | 4.1  |
| 6  | 4  | 25.1 | 18.8 |
| 3  | 1  | 14.8 | 8.5  |
| 5  | 5  | 9.2  | 9.2  |
| 35 | 4  | 75   | 9.4  |
| 34 | 3  | 73.8 | 8.3  |
| 2  | 2  | 2.1  | 2.1  |
| 1  | 1  | 13   | 13   |
| 5  | 5  | 10.4 | 10.4 |

|    |    |      |      |
|----|----|------|------|
| 2  | 2  | 3.3  | 3.3  |
| 5  | 5  | 7    | 7    |
| 20 | 20 | 42.3 | 42.3 |
| 70 | 68 | 20.1 | 18.9 |
| 14 | 14 | 29.1 | 29.1 |
| 20 | 20 | 54.9 | 54.9 |
| 6  | 6  | 29.5 | 29.5 |
| 22 | 22 | 48.3 | 48.3 |
| 2  | 2  | 3.6  | 3.6  |
| 2  | 2  | 17.8 | 17.8 |
| 35 | 29 | 72.1 | 61.3 |
| 1  | 1  | 4.4  | 4.4  |
| 1  | 1  | 2.3  | 2.3  |
| 5  | 5  | 4.1  | 4.1  |
| 1  | 1  | 1.5  | 1.5  |
| 3  | 3  | 10.9 | 10.9 |
| 1  | 1  | 1.5  | 1.5  |
| 7  | 7  | 31.8 | 31.8 |
| 10 | 10 | 23.6 | 23.6 |
| 2  | 2  | 6.8  | 6.8  |
| 2  | 2  | 6.9  | 6.9  |
| 1  | 1  | 8    | 8    |
| 4  | 4  | 16.1 | 16.1 |
| 1  | 1  | 4.8  | 4.8  |
| 7  | 7  | 39.3 | 39.3 |
| 12 | 12 | 27.6 | 27.6 |
| 55 | 2  | 66.2 | 2.6  |
| 55 | 2  | 67.4 | 1.7  |
| 5  | 5  | 26   | 26   |
| 6  | 6  | 28.5 | 28.5 |
| 13 | 13 | 74.4 | 74.4 |
| 9  | 9  | 43.5 | 43.5 |
| 3  | 3  | 16.5 | 16.5 |
| 7  | 7  | 19.7 | 19.7 |
| 2  | 2  | 1.1  | 1.1  |
| 2  | 2  | 5.1  | 5.1  |
| 4  | 4  | 11.9 | 11.9 |
| 15 | 3  | 42.7 | 11.5 |
| 21 | 8  | 73.1 | 40.7 |
| 14 | 1  | 39.6 | 4.3  |
| 17 | 17 | 20.1 | 20.1 |

|    |    |      |      |
|----|----|------|------|
| 2  | 2  | 2.4  | 2.4  |
| 3  | 3  | 7.3  | 7.3  |
| 5  | 5  | 36.7 | 36.7 |
| 8  | 8  | 28.3 | 28.3 |
| 7  | 7  | 32.7 | 32.7 |
| 22 | 16 | 45.5 | 34.8 |
| 4  | 4  | 11.9 | 11.9 |
| 8  | 8  | 50.8 | 50.8 |
| 3  | 3  | 7.8  | 7.8  |
| 4  | 3  | 16.4 | 12.6 |
| 1  | 1  | 4.3  | 4.3  |
| 1  | 1  | 2.8  | 2.8  |
| 4  | 4  | 22.2 | 22.2 |
| 3  | 3  | 16.9 | 16.9 |
| 16 | 15 | 62.3 | 62.3 |
| 11 | 11 | 78.3 | 78.3 |
| 5  | 5  | 38.1 | 38.1 |
| 8  | 7  | 38.7 | 38.7 |
| 13 | 13 | 74.7 | 74.7 |
| 14 | 14 | 62.9 | 62.9 |
| 19 | 19 | 48.1 | 48.1 |
| 5  | 5  | 9.4  | 9.4  |
| 6  | 5  | 17.7 | 14.7 |
| 2  | 2  | 7.6  | 7.6  |
| 1  | 1  | 5.8  | 5.8  |
| 5  | 5  | 22   | 22   |
| 7  | 4  | 20.4 | 10.2 |
| 8  | 5  | 27.9 | 18   |
| 2  | 2  | 5.7  | 5.7  |
| 5  | 5  | 8.5  | 8.5  |
| 11 | 11 | 43.1 | 43.1 |
| 3  | 3  | 5.8  | 5.8  |
| 12 | 12 | 20   | 20   |
| 1  | 1  | 6.1  | 6.1  |
| 1  | 1  | 1.7  | 1.7  |
| 1  | 1  | 7    | 7    |
| 4  | 4  | 28.1 | 28.1 |
| 3  | 3  | 13.1 | 13.1 |
| 10 | 10 | 6    | 6    |
| 17 | 12 | 33.4 | 26.9 |
| 4  | 4  | 14.5 | 14.5 |

|    |    |      |      |
|----|----|------|------|
| 5  | 5  | 19.9 | 19.9 |
| 2  | 2  | 7.7  | 7.7  |
| 12 | 12 | 27.8 | 27.8 |
| 3  | 2  | 10.9 | 8.5  |
| 10 | 10 | 47.1 | 47.1 |
| 8  | 8  | 43.6 | 43.6 |
| 3  | 3  | 12.9 | 12.9 |
| 6  | 6  | 39.1 | 39.1 |
| 6  | 6  | 41.1 | 41.1 |
| 6  | 6  | 30.1 | 30.1 |
| 6  | 6  | 35.5 | 35.5 |
| 6  | 6  | 36.7 | 36.7 |
| 7  | 7  | 53.7 | 53.7 |
| 5  | 5  | 35.6 | 35.6 |
| 4  | 4  | 27.3 | 27.3 |
| 5  | 5  | 22.7 | 22.7 |
| 3  | 3  | 25.6 | 25.6 |
| 3  | 3  | 21.3 | 21.3 |
| 5  | 5  | 13.6 | 13.6 |
| 7  | 7  | 21.2 | 21.2 |
| 9  | 9  | 26.7 | 26.7 |
| 13 | 13 | 45   | 45   |
| 8  | 8  | 33   | 33   |
| 12 | 12 | 41.9 | 41.9 |
| 12 | 12 | 23.3 | 23.3 |
| 15 | 15 | 39.8 | 39.8 |
| 5  | 5  | 14   | 14   |
| 7  | 7  | 29.8 | 29.8 |
| 4  | 4  | 24.8 | 24.8 |
| 16 | 16 | 28.5 | 28.5 |
| 4  | 4  | 11.1 | 11.1 |
| 4  | 4  | 12   | 12   |
| 8  | 8  | 23.2 | 23.2 |
| 2  | 2  | 6.2  | 6.2  |
| 9  | 9  | 41.1 | 41.1 |
| 4  | 4  | 13.9 | 13.9 |
| 3  | 3  | 17.1 | 17.1 |
| 10 | 10 | 45.8 | 45.8 |
| 8  | 8  | 40.2 | 40.2 |
| 1  | 1  | 3.5  | 3.5  |
| 13 | 13 | 52.4 | 52.4 |

|    |    |      |      |
|----|----|------|------|
| 2  | 2  | 9.4  | 9.4  |
| 1  | 1  | 2.3  | 2.3  |
| 1  | 1  | 9.6  | 9.6  |
| 7  | 7  | 25   | 25   |
| 4  | 4  | 30.6 | 30.6 |
| 2  | 2  | 2.6  | 2.6  |
| 25 | 25 | 59.1 | 59.1 |
| 2  | 2  | 7    | 7    |
| 5  | 5  | 22.5 | 22.5 |
| 3  | 3  | 7.6  | 7.6  |
| 1  | 1  | 10.9 | 10.9 |
| 3  | 3  | 26.3 | 26.3 |
| 9  | 9  | 23.1 | 23.1 |
| 1  | 1  | 1.9  | 1.9  |
| 2  | 2  | 2    | 2    |
| 2  | 2  | 1.8  | 1.8  |
| 16 | 16 | 40.6 | 40.6 |
| 2  | 2  | 19.9 | 19.9 |
| 1  | 1  | 6.2  | 6.2  |
| 3  | 3  | 12.1 | 12.1 |
| 5  | 5  | 5.2  | 5.2  |
| 6  | 6  | 18.9 | 18.9 |
| 34 | 24 | 45.7 | 32.3 |
| 15 | 9  | 24.6 | 16.6 |
| 40 | 30 | 53.7 | 39.8 |
| 14 | 14 | 25.9 | 25.9 |
| 7  | 7  | 39.8 | 39.8 |
| 3  | 3  | 50.4 | 50.4 |
| 2  | 2  | 10.7 | 10.7 |
| 4  | 3  | 19.5 | 14   |
| 7  | 7  | 37.6 | 37.6 |
| 1  | 1  | 3.7  | 3.7  |
| 7  | 7  | 47.9 | 47.9 |
| 4  | 4  | 22.8 | 22.8 |
| 7  | 6  | 38   | 32.7 |
| 5  | 4  | 26.9 | 21.4 |
| 5  | 5  | 22.1 | 22.1 |
| 1  | 1  | 5    | 5    |
| 6  | 6  | 37.3 | 37.3 |
| 2  | 2  | 6.2  | 6.2  |
| 1  | 1  | 9    | 9    |

|    |    |      |      |
|----|----|------|------|
| 5  | 3  | 31.6 | 21.9 |
| 5  | 3  | 31.6 | 21.9 |
| 5  | 3  | 31.5 | 21.8 |
| 4  | 4  | 20.2 | 20.2 |
| 9  | 9  | 56.5 | 56.5 |
| 2  | 1  | 12.1 | 6.8  |
| 2  | 1  | 12.1 | 6.8  |
| 10 | 4  | 56.2 | 21.4 |
| 4  | 4  | 17.5 | 17.5 |
| 2  | 2  | 10.7 | 10.7 |
| 1  | 1  | 4.1  | 4.1  |
| 7  | 7  | 34.7 | 34.7 |
| 2  | 2  | 21.7 | 21.7 |
| 3  | 3  | 1.6  | 1.6  |
| 1  | 1  | 1.7  | 1.7  |
| 8  | 2  | 58.2 | 15.2 |
| 10 | 4  | 72.8 | 29.9 |
| 1  | 1  | 6.6  | 6.6  |
| 2  | 2  | 17.9 | 17.9 |
| 13 | 13 | 24.1 | 24.1 |
| 1  | 1  | 2.1  | 2.1  |
| 6  | 2  | 15.8 | 10.1 |
| 6  | 2  | 15.8 | 10.1 |
| 9  | 9  | 67.7 | 67.7 |
| 2  | 2  | 3.9  | 3.9  |
| 1  | 1  | 1.5  | 1.5  |
| 2  | 2  | 4.8  | 4.8  |
| 2  | 2  | 32.7 | 32.7 |
| 6  | 6  | 14.7 | 14.7 |
| 3  | 3  | 7.7  | 7.7  |
| 11 | 11 | 80   | 80   |
| 2  | 2  | 10   | 10   |
| 6  | 4  | 33.5 | 28.4 |
| 3  | 1  | 11.7 | 6.8  |
| 1  | 1  | 1.9  | 1.9  |
| 1  | 1  | 7.5  | 7.5  |
| 4  | 4  | 22   | 22   |
| 4  | 4  | 15.8 | 15.8 |
| 3  | 3  | 9.6  | 9.6  |
| 17 | 6  | 25.7 | 13.6 |
| 2  | 2  | 16.2 | 16.2 |

|    |    |      |      |
|----|----|------|------|
| 1  | 1  | 7.6  | 7.6  |
| 2  | 2  | 6.8  | 6.8  |
| 10 | 2  | 65.8 | 18.7 |
| 4  | 2  | 20.9 | 7.7  |
| 10 | 2  | 55.4 | 12.4 |
| 2  | 1  | 12.2 | 6.8  |
| 5  | 5  | 7.4  | 7.4  |
| 2  | 2  | 8.4  | 8.4  |
| 3  | 3  | 5.9  | 5.9  |
| 2  | 2  | 8.3  | 8.3  |
| 3  | 3  | 16.9 | 16.9 |
| 19 | 19 | 71.9 | 71.9 |
| 8  | 8  | 20.6 | 20.6 |
| 16 | 12 | 15.2 | 12   |
| 9  | 5  | 8.4  | 5.3  |
| 1  | 1  | 8.5  | 8.5  |
| 1  | 1  | 8.3  | 8.3  |
| 7  | 7  | 42.5 | 42.5 |
| 8  | 8  | 33.2 | 33.2 |
| 2  | 2  | 12.9 | 12.9 |
| 4  | 4  | 35.8 | 35.8 |
| 6  | 6  | 28.4 | 28.4 |
| 3  | 3  | 8.4  | 8.4  |
| 5  | 5  | 25.8 | 25.8 |
| 7  | 7  | 34.3 | 34.3 |
| 5  | 5  | 28.3 | 28.3 |
| 5  | 5  | 26.1 | 26.1 |
| 5  | 5  | 15.3 | 15.3 |
| 4  | 4  | 21.4 | 21.4 |
| 5  | 5  | 33.1 | 33.1 |
| 3  | 3  | 39.1 | 39.1 |
| 3  | 3  | 27.1 | 27.1 |
| 5  | 5  | 27.6 | 27.6 |
| 5  | 5  | 29.9 | 29.9 |
| 3  | 3  | 18.6 | 18.6 |
| 3  | 3  | 20.6 | 20.6 |
| 4  | 4  | 27.7 | 27.7 |
| 2  | 2  | 12.4 | 12.4 |
| 2  | 2  | 11.9 | 11.9 |
| 8  | 8  | 23.1 | 23.1 |
| 2  | 2  | 24.3 | 24.3 |



|    |    |      |      |
|----|----|------|------|
| 1  | 1  | 11.2 | 11.2 |
| 6  | 6  | 39.3 | 39.3 |
| 3  | 3  | 20.5 | 20.5 |
| 1  | 1  | 8.1  | 8.1  |
| 2  | 2  | 7.3  | 7.3  |
| 2  | 2  | 11.4 | 11.4 |
| 3  | 3  | 41.3 | 41.3 |
| 3  | 3  | 51.4 | 51.4 |
| 1  | 1  | 19.6 | 19.6 |
| 19 | 19 | 42.7 | 42.7 |
| 8  | 8  | 32.3 | 32.3 |
| 8  | 8  | 30.4 | 30.4 |
| 13 | 13 | 40.4 | 40.4 |
| 14 | 14 | 46.2 | 46.2 |
| 6  | 6  | 35.4 | 35.4 |
| 4  | 4  | 36.5 | 36.5 |
| 12 | 12 | 53.9 | 53.9 |
| 4  | 4  | 79.8 | 79.8 |
| 5  | 5  | 76.5 | 76.5 |
| 19 | 19 | 42.3 | 42.3 |
| 11 | 11 | 28.7 | 28.7 |
| 6  | 6  | 42.4 | 42.4 |
| 5  | 5  | 24.1 | 24.1 |
| 7  | 7  | 59.1 | 59.1 |
| 10 | 10 | 45   | 45   |
| 5  | 5  | 63.6 | 63.6 |
| 4  | 4  | 55.9 | 55.9 |
| 7  | 7  | 49.2 | 49.2 |
| 2  | 2  | 15.8 | 15.8 |
| 4  | 4  | 40   | 40   |
| 5  | 5  | 27.6 | 27.6 |
| 7  | 7  | 37.2 | 37.2 |
| 8  | 8  | 33.4 | 33.4 |
| 3  | 3  | 25.2 | 25.2 |
| 2  | 2  | 28.9 | 28.9 |
| 4  | 4  | 21.7 | 21.7 |
| 4  | 4  | 30   | 30   |
| 4  | 4  | 18.4 | 18.4 |
| 4  | 4  | 37.4 | 37.4 |
| 5  | 5  | 42.3 | 42.3 |
| 2  | 2  | 25   | 25   |

|    |    |      |      |
|----|----|------|------|
| 1  | 1  | 17.4 | 17.4 |
| 1  | 1  | 19.6 | 19.6 |
| 10 | 10 | 50.6 | 50.6 |
| 8  | 8  | 32.2 | 32.2 |
| 10 | 10 | 38.4 | 38.4 |
| 8  | 8  | 42.6 | 42.6 |
| 2  | 2  | 10.8 | 10.8 |
| 1  | 1  | 2.2  | 2.2  |
| 7  | 7  | 45.4 | 45.4 |
| 9  | 9  | 41.3 | 41.3 |
| 9  | 9  | 32.5 | 32.5 |
| 12 | 12 | 57.6 | 57.6 |
| 1  | 1  | 6.2  | 6.2  |
| 1  | 1  | 3.6  | 3.6  |
| 11 | 8  | 51.4 | 44   |
| 12 | 12 | 11.4 | 11.4 |
| 14 | 14 | 62.8 | 62.8 |
| 2  | 2  | 6.6  | 6.6  |
| 6  | 6  | 16.8 | 16.8 |
| 2  | 2  | 2.3  | 2.3  |
| 2  | 2  | 13.2 | 13.2 |
| 2  | 2  | 11   | 11   |
| 7  | 1  | 12   | 2.1  |
| 7  | 1  | 36.2 | 3.7  |
| 6  | 6  | 31.6 | 31.6 |
| 1  | 1  | 2.9  | 2.9  |
| 4  | 4  | 12.1 | 12.1 |
| 1  | 1  | 0.4  | 0.4  |
| 1  | 1  | 16   | 16   |
| 4  | 4  | 72.2 | 72.2 |
| 4  | 4  | 64.3 | 64.3 |
| 3  | 3  | 46.9 | 46.9 |
| 2  | 2  | 34.7 | 34.7 |
| 5  | 5  | 42.6 | 42.6 |
| 1  | 1  | 18.3 | 18.3 |
| 3  | 3  | 33.7 | 33.7 |
| 1  | 1  | 3.7  | 3.7  |
| 7  | 7  | 11.6 | 11.6 |
| 5  | 5  | 22.3 | 22.3 |
| 2  | 2  | 2.1  | 2.1  |
| 9  | 9  | 20.7 | 20.7 |

|    |    |      |      |
|----|----|------|------|
| 6  | 6  | 15.6 | 15.6 |
| 6  | 5  | 35.9 | 30.3 |
| 4  | 3  | 21.2 | 15.7 |
| 10 | 10 | 28.5 | 28.5 |
| 1  | 1  | 6.8  | 6.8  |
| 2  | 2  | 13.9 | 13.9 |
| 3  | 3  | 10.9 | 10.9 |
| 2  | 2  | 13.3 | 13.3 |
| 7  | 7  | 22.1 | 22.1 |
| 1  | 1  | 22.2 | 22.2 |
| 5  | 5  | 40.6 | 40.6 |
| 2  | 2  | 5.8  | 5.8  |
| 2  | 2  | 7    | 7    |
| 2  | 2  | 12.7 | 12.7 |
| 6  | 6  | 11.3 | 11.3 |
| 17 | 17 | 44.9 | 44.9 |
| 8  | 8  | 31.6 | 31.6 |
| 3  | 3  | 17.2 | 17.2 |
| 2  | 2  | 20.8 | 20.8 |
| 8  | 8  | 16.7 | 16.7 |
| 2  | 2  | 6.7  | 6.7  |
| 3  | 3  | 18.6 | 18.6 |
| 3  | 3  | 18.6 | 18.6 |
| 17 | 15 | 30.1 | 28.8 |
| 3  | 1  | 4.8  | 1.7  |
| 3  | 3  | 6.1  | 6.1  |
| 21 | 21 | 27.2 | 27.2 |
| 1  | 1  | 0.7  | 0.7  |
| 4  | 4  | 18.1 | 18.1 |
| 23 | 23 | 59.3 | 59.3 |
| 2  | 2  | 20   | 20   |
| 1  | 1  | 4.2  | 4.2  |
| 1  | 1  | 10.8 | 10.8 |
| 2  | 2  | 9.2  | 9.2  |
| 1  | 1  | 5.8  | 5.8  |
| 5  | 2  | 14.4 | 7.5  |
| 13 | 13 | 53.2 | 53.2 |
| 6  | 6  | 29.8 | 29.8 |
| 6  | 3  | 17.3 | 10.5 |
| 6  | 5  | 19   | 17   |
| 6  | 4  | 25.6 | 20   |

|    |    |      |      |
|----|----|------|------|
| 12 | 12 | 28   | 28   |
| 3  | 3  | 20   | 20   |
| 15 | 1  | 43.1 | 5.3  |
| 14 | 5  | 48.4 | 19.4 |
| 15 | 1  | 43.2 | 5.3  |
| 15 | 5  | 44.8 | 16.9 |
| 12 | 6  | 32.7 | 18.2 |
| 13 | 8  | 34.2 | 19.9 |
| 6  | 1  | 19.4 | 5    |
| 7  | 5  | 17   | 13.4 |
| 1  | 1  | 3    | 3    |
| 4  | 4  | 11.9 | 11.9 |
| 16 | 16 | 55.3 | 55.3 |
| 18 | 13 | 42.6 | 34.6 |
| 8  | 8  | 21.8 | 21.8 |
| 16 | 16 | 49.1 | 49.1 |
| 6  | 6  | 24.2 | 24.2 |
| 1  | 1  | 1.6  | 1.6  |
| 6  | 6  | 23.2 | 23.2 |
| 17 | 17 | 56.1 | 56.1 |
| 3  | 3  | 19.5 | 19.5 |
| 1  | 1  | 4.9  | 4.9  |
| 4  | 4  | 13.5 | 13.5 |
| 3  | 3  | 4.6  | 4.6  |
| 1  | 1  | 3.6  | 3.6  |
| 6  | 6  | 7.2  | 7.2  |
| 4  | 4  | 5.5  | 5.5  |
| 1  | 1  | 5.4  | 5.4  |
| 3  | 1  | 10.5 | 3.2  |
| 11 | 11 | 25.6 | 25.6 |
| 7  | 7  | 34.1 | 34.1 |
| 7  | 6  | 38.2 | 32.3 |
| 13 | 12 | 60.7 | 54.8 |
| 5  | 5  | 17.1 | 17.1 |
| 6  | 6  | 26.2 | 26.2 |
| 5  | 5  | 18   | 18   |
| 6  | 6  | 21.3 | 21.3 |
| 1  | 1  | 6.5  | 6.5  |
| 1  | 1  | 3    | 3    |
| 2  | 2  | 7.6  | 7.6  |
| 6  | 6  | 71.1 | 71.1 |

|    |    |      |      |
|----|----|------|------|
| 3  | 3  | 57   | 57   |
| 1  | 1  | 1.6  | 1.6  |
| 3  | 3  | 9.2  | 9.2  |
| 3  | 3  | 11.5 | 11.5 |
| 3  | 3  | 11.3 | 11.3 |
| 2  | 2  | 2.2  | 2.2  |
| 5  | 5  | 18.6 | 18.6 |
| 1  | 1  | 1.1  | 1.1  |
| 2  | 2  | 12.3 | 12.3 |
| 2  | 2  | 2.7  | 2.7  |
| 3  | 3  | 25.8 | 25.8 |
| 2  | 2  | 1.6  | 1.6  |
| 2  | 2  | 6    | 6    |
| 7  | 7  | 33.1 | 33.1 |
| 2  | 2  | 11.1 | 11.1 |
| 8  | 8  | 34.4 | 34.4 |
| 12 | 10 | 26.6 | 24.1 |
| 8  | 8  | 43.5 | 43.5 |
| 6  | 6  | 21.3 | 21.3 |
| 11 | 11 | 34.5 | 34.5 |
| 20 | 10 | 58.4 | 25.5 |
| 2  | 2  | 12.3 | 12.3 |
| 20 | 10 | 55.4 | 27.9 |
| 1  | 1  | 6.4  | 6.4  |
| 2  | 2  | 2.9  | 2.9  |
| 1  | 1  | 2.8  | 2.8  |
| 2  | 2  | 3.7  | 3.7  |
| 3  | 3  | 9.3  | 9.3  |
| 6  | 6  | 11.8 | 11.8 |
| 22 | 22 | 32.9 | 32.9 |
| 3  | 3  | 3.5  | 3.5  |
| 2  | 2  | 2.6  | 2.6  |
| 12 | 12 | 38.7 | 38.7 |
| 2  | 2  | 2.3  | 2.3  |
| 4  | 4  | 3.9  | 3.9  |
| 5  | 5  | 7    | 7    |
| 4  | 4  | 3.5  | 3.5  |
| 1  | 1  | 1    | 1    |
| 1  | 1  | 15.9 | 15.9 |
| 7  | 7  | 21   | 21   |
| 1  | 1  | 2    | 2    |

|    |    |      |      |
|----|----|------|------|
| 1  | 1  | 4.9  | 4.9  |
| 1  | 1  | 2.2  | 2.2  |
| 29 | 29 | 39.8 | 39.8 |
| 3  | 3  | 8.1  | 8.1  |
| 3  | 3  | 43.1 | 43.1 |
| 14 | 14 | 23.6 | 23.6 |
| 10 | 10 | 6.6  | 6.6  |
| 3  | 3  | 21.7 | 21.7 |
| 4  | 3  | 21.6 | 18.8 |
| 3  | 3  | 6.9  | 6.9  |
| 3  | 2  | 17.8 | 14.2 |
| 1  | 1  | 16.8 | 16.8 |
| 2  | 2  | 15.1 | 15.1 |
| 1  | 1  | 12   | 12   |
| 1  | 1  | 24.4 | 24.4 |
| 1  | 1  | 9.2  | 9.2  |
| 6  | 5  | 18.9 | 17.5 |
| 12 | 11 | 33.3 | 32   |
| 11 | 10 | 24.6 | 23.3 |
| 6  | 5  | 14.4 | 12.5 |
| 4  | 3  | 22.4 | 18.2 |
| 1  | 1  | 4.9  | 4.9  |
| 6  | 6  | 15   | 15   |
| 3  | 2  | 9.4  | 7.5  |
| 4  | 3  | 21   | 16.7 |
| 2  | 2  | 5.3  | 5.3  |
| 6  | 6  | 16.6 | 16.6 |
| 2  | 2  | 4.7  | 4.7  |
| 8  | 8  | 21   | 21   |
| 4  | 4  | 31.8 | 31.8 |
| 9  | 9  | 67.6 | 67.6 |
| 10 | 10 | 57.4 | 57.4 |
| 13 | 13 | 22   | 22   |
| 20 | 20 | 46.6 | 46.6 |
| 6  | 6  | 10.8 | 10.8 |
| 2  | 2  | 7.3  | 7.3  |
| 5  | 5  | 26.5 | 26.5 |
| 3  | 3  | 2.3  | 2.3  |
| 7  | 7  | 40.7 | 40.7 |
| 2  | 2  | 3.7  | 3.7  |
| 1  | 1  | 8.4  | 8.4  |

|    |    |      |      |
|----|----|------|------|
| 5  | 5  | 8.6  | 8.6  |
| 6  | 6  | 32.6 | 32.6 |
| 37 | 37 | 23   | 23   |
| 88 | 88 | 44.9 | 44.9 |
| 39 | 36 | 24   | 22.7 |
| 77 | 74 | 46.6 | 45.4 |
| 10 | 10 | 23.3 | 23.3 |
| 7  | 7  | 44.3 | 44.3 |
| 4  | 4  | 22.8 | 22.8 |
| 1  | 1  | 12.7 | 12.7 |
| 4  | 4  | 12.1 | 12.1 |
| 1  | 1  | 4.4  | 4.4  |
| 6  | 6  | 20.8 | 20.8 |
| 1  | 1  | 1.3  | 1.3  |
| 3  | 3  | 2.7  | 2.7  |
| 3  | 3  | 25.5 | 25.5 |
| 2  | 2  | 15.3 | 15.3 |
| 2  | 2  | 10.9 | 10.9 |
| 2  | 2  | 24.2 | 24.2 |
| 2  | 2  | 4.7  | 4.7  |
| 3  | 3  | 26.1 | 26.1 |
| 7  | 7  | 24.6 | 24.6 |
| 1  | 1  | 9.9  | 9.9  |
| 1  | 1  | 4.2  | 4.2  |
| 2  | 2  | 8    | 8    |
| 2  | 2  | 14   | 14   |
| 4  | 4  | 12.7 | 12.7 |
| 2  | 2  | 4.7  | 4.7  |
| 6  | 6  | 16.6 | 16.6 |
| 4  | 4  | 11.3 | 11.3 |
| 2  | 2  | 3.4  | 3.4  |
| 18 | 18 | 33.7 | 33.7 |
| 5  | 5  | 16.9 | 16.9 |
| 1  | 1  | 4.5  | 4.5  |
| 7  | 7  | 38.7 | 38.7 |
| 4  | 4  | 25.8 | 25.8 |
| 3  | 3  | 4.9  | 4.9  |
| 1  | 1  | 2.3  | 2.3  |
| 3  | 3  | 8    | 8    |
| 1  | 1  | 1    | 1    |
| 3  | 3  | 3.3  | 3.3  |

|    |    |      |      |
|----|----|------|------|
| 4  | 4  | 20.8 | 20.8 |
| 1  | 1  | 5.5  | 5.5  |
| 1  | 1  | 5.4  | 5.4  |
| 5  | 5  | 14.6 | 14.6 |
| 7  | 7  | 17.5 | 17.5 |
| 16 | 16 | 41.9 | 41.9 |
| 11 | 11 | 34.7 | 34.7 |
| 7  | 7  | 21.6 | 21.6 |
| 4  | 4  | 17   | 17   |
| 1  | 1  | 1.6  | 1.6  |
| 5  | 5  | 9.8  | 9.8  |
| 11 | 11 | 23.2 | 23.2 |
| 1  | 1  | 5.5  | 5.5  |
| 3  | 3  | 16.4 | 16.4 |
| 10 | 10 | 20   | 20   |
| 7  | 7  | 4.3  | 4.3  |
| 1  | 1  | 7.1  | 7.1  |
| 9  | 9  | 18.7 | 18.7 |
| 14 | 14 | 2.8  | 2.8  |
| 4  | 4  | 0.8  | 0.8  |
| 2  | 2  | 2.2  | 2.2  |
| 14 | 14 | 23.1 | 23.1 |
| 27 | 27 | 41.8 | 41.8 |
| 28 | 28 | 90.5 | 90.5 |
| 22 | 20 | 91   | 79.9 |
| 3  | 1  | 18.1 | 7    |
| 10 | 10 | 26.7 | 26.7 |
| 4  | 4  | 15.6 | 15.6 |
| 10 | 10 | 38.2 | 38.2 |
| 7  | 7  | 12.9 | 12.9 |
| 2  | 2  | 1.9  | 1.9  |
| 1  | 1  | 1.3  | 1.3  |
| 2  | 2  | 7.3  | 7.3  |
| 3  | 3  | 28.6 | 28.6 |
| 2  | 2  | 28   | 28   |
| 1  | 1  | 3.3  | 3.3  |
| 16 | 16 | 41.7 | 41.7 |
| 13 | 13 | 43.5 | 43.5 |
| 33 | 32 | 54.4 | 53.2 |
| 21 | 21 | 76.1 | 76.1 |
| 27 | 27 | 55.5 | 55.5 |



|     |     |      |      |
|-----|-----|------|------|
| 33  | 33  | 60.3 | 60.3 |
| 3   | 3   | 9.4  | 9.4  |
| 13  | 13  | 14.3 | 14.3 |
| 16  | 16  | 18   | 18   |
| 2   | 2   | 6.3  | 6.3  |
| 4   | 4   | 31.5 | 31.5 |
| 2   | 2   | 26.3 | 26.3 |
| 3   | 3   | 6    | 6    |
| 1   | 1   | 2.8  | 2.8  |
| 4   | 4   | 26.1 | 26.1 |
| 19  | 19  | 65   | 65   |
| 4   | 4   | 4    | 4    |
| 36  | 36  | 69.2 | 69.2 |
| 125 | 115 | 67.1 | 63.1 |
| 16  | 6   | 8.8  | 4.6  |
| 2   | 2   | 12.2 | 12.2 |
| 5   | 5   | 22.4 | 22.4 |
| 3   | 3   | 20.4 | 20.4 |
| 3   | 2   | 14.5 | 7.2  |
| 2   | 2   | 24.6 | 24.6 |
| 1   | 1   | 15   | 15   |
| 1   | 1   | 24.8 | 24.8 |
| 11  | 11  | 42.2 | 42.2 |
| 4   | 3   | 13.6 | 11.4 |
| 9   | 8   | 34.4 | 32.1 |
| 9   | 4   | 33.9 | 14.5 |
| 8   | 3   | 18.3 | 7.6  |
| 2   | 1   | 47.7 | 31.8 |
| 7   | 6   | 77.3 | 77.3 |
| 3   | 3   | 5.2  | 5.2  |
| 2   | 2   | 9    | 9    |
| 2   | 2   | 9.2  | 9.2  |
| 1   | 1   | 3.9  | 3.9  |
| 13  | 13  | 12.1 | 12.1 |
| 1   | 1   | 11.6 | 11.6 |
| 9   | 5   | 15.6 | 9.2  |
| 5   | 1   | 9.6  | 3.2  |
| 6   | 6   | 10.2 | 10.2 |
| 19  | 17  | 19.9 | 18.4 |
| 4   | 4   | 10.8 | 10.8 |
| 4   | 4   | 13.4 | 13.4 |

|    |    |      |      |
|----|----|------|------|
| 2  | 2  | 22.5 | 22.5 |
| 3  | 3  | 15.5 | 15.5 |
| 1  | 1  | 23.3 | 23.3 |
| 4  | 4  | 8.8  | 8.8  |
| 2  | 2  | 1.6  | 1.6  |
| 7  | 7  | 6.1  | 6.1  |
| 3  | 3  | 10.2 | 10.2 |
| 1  | 1  | 2.4  | 2.4  |
| 2  | 2  | 8.6  | 8.6  |
| 2  | 2  | 7.5  | 7.5  |
| 3  | 3  | 21.1 | 21.1 |
| 4  | 4  | 29.1 | 29.1 |
| 19 | 19 | 71.2 | 71.2 |
| 23 | 2  | 53.5 | 9.9  |
| 14 | 6  | 40.7 | 24.2 |
| 9  | 9  | 39.5 | 39.5 |
| 4  | 4  | 15.3 | 15.3 |
| 1  | 1  | 7.3  | 7.3  |
| 11 | 11 | 52.8 | 52.8 |
| 2  | 2  | 1.2  | 1.2  |
| 1  | 1  | 6.8  | 6.8  |
| 1  | 1  | 6.3  | 6.3  |
| 5  | 5  | 48.3 | 48.3 |
| 2  | 2  | 3.8  | 3.8  |
| 1  | 1  | 8.6  | 8.6  |
| 2  | 2  | 15   | 15   |
| 1  | 1  | 12   | 12   |
| 1  | 1  | 1.9  | 1.9  |
| 8  | 8  | 16.4 | 16.4 |
| 7  | 7  | 15.8 | 15.8 |
| 1  | 1  | 1    | 1    |
| 5  | 5  | 15.2 | 15.2 |
| 6  | 6  | 22.1 | 22.1 |
| 1  | 1  | 9.6  | 9.6  |
| 4  | 4  | 9.9  | 9.9  |
| 3  | 3  | 19.7 | 19.7 |
| 5  | 5  | 23.4 | 23.4 |
| 1  | 1  | 10.5 | 10.5 |
| 1  | 1  | 4.6  | 4.6  |
| 3  | 3  | 38.5 | 38.5 |
| 4  | 4  | 16.2 | 16.2 |

|    |    |      |      |
|----|----|------|------|
| 1  | 1  | 0.6  | 0.6  |
| 5  | 5  | 14.2 | 14.2 |
| 2  | 2  | 4.1  | 4.1  |
| 27 | 27 | 1    | 1    |
| 4  | 4  | 47.6 | 47.6 |
| 26 | 1  | 76.9 | 3.1  |
| 26 | 0  | 76.9 | 0    |
| 26 | 1  | 77.3 | 5.3  |
| 21 | 3  | 57.6 | 10   |
| 25 | 5  | 66.3 | 18.9 |
| 21 | 5  | 57.3 | 24.7 |
| 25 | 3  | 69.8 | 11.5 |
| 28 | 1  | 73.3 | 2.7  |
| 26 | 5  | 69.1 | 16.2 |
| 17 | 3  | 44.3 | 15.2 |
| 10 | 10 | 30.3 | 30.3 |
| 3  | 1  | 7.7  | 3.7  |
| 4  | 2  | 14.4 | 10.4 |
| 6  | 6  | 55.2 | 55.2 |
| 1  | 1  | 12.7 | 12.7 |
| 4  | 4  | 44.7 | 44.7 |
| 7  | 7  | 26.4 | 26.4 |
| 3  | 3  | 13.5 | 13.5 |
| 5  | 5  | 17.4 | 17.4 |
| 3  | 3  | 18.4 | 18.4 |
| 2  | 2  | 7.2  | 7.2  |
| 6  | 6  | 16.8 | 16.8 |
| 30 | 30 | 47.7 | 47.7 |
| 2  | 2  | 4.2  | 4.2  |
| 1  | 1  | 3.8  | 3.8  |
| 3  | 3  | 14.9 | 14.9 |
| 2  | 2  | 1.8  | 1.8  |
| 4  | 4  | 42.9 | 42.9 |
| 2  | 2  | 13.9 | 13.9 |
| 3  | 3  | 24.5 | 24.5 |
| 4  | 4  | 41.6 | 41.6 |
| 5  | 5  | 48   | 48   |
| 4  | 4  | 18.6 | 18.6 |
| 2  | 2  | 2.5  | 2.5  |
| 1  | 1  | 1.4  | 1.4  |
| 1  | 1  | 1.5  | 1.5  |

|    |    |      |      |
|----|----|------|------|
| 1  | 1  | 12.3 | 12.3 |
| 4  | 2  | 9.7  | 5.2  |
| 3  | 1  | 6.3  | 2.4  |
| 5  | 5  | 1.6  | 1.6  |
| 1  | 1  | 5.4  | 5.4  |
| 1  | 1  | 6.9  | 6.9  |
| 10 | 10 | 71.7 | 71.7 |
| 2  | 2  | 13   | 13   |
| 18 | 18 | 80.8 | 80.8 |
| 3  | 3  | 28.7 | 28.7 |
| 3  | 3  | 11.7 | 11.7 |
| 2  | 2  | 58.8 | 58.8 |
| 9  | 9  | 26.8 | 26.8 |
| 18 | 18 | 21.3 | 21.3 |
| 9  | 9  | 21.5 | 21.5 |
| 2  | 2  | 5.1  | 5.1  |
| 1  | 1  | 4.6  | 4.6  |
| 22 | 22 | 32.2 | 32.2 |
| 7  | 7  | 7.5  | 7.5  |
| 2  | 2  | 37.5 | 37.5 |
| 1  | 1  | 21.4 | 21.4 |
| 5  | 5  | 45   | 45   |
| 22 | 22 | 55.6 | 55.6 |
| 19 | 19 | 60.9 | 60.9 |
| 8  | 8  | 46   | 46   |
| 1  | 1  | 20.2 | 20.2 |
| 6  | 6  | 68.3 | 68.3 |
| 2  | 2  | 9.5  | 9.5  |
| 1  | 1  | 17.2 | 17.2 |
| 8  | 8  | 12.2 | 12.2 |
| 4  | 4  | 11.2 | 11.2 |
| 1  | 1  | 1.6  | 1.6  |
| 1  | 1  | 1.3  | 1.3  |
| 5  | 5  | 11.2 | 11.2 |
| 15 | 15 | 32.8 | 32.8 |
| 3  | 3  | 3.5  | 3.5  |
| 9  | 9  | 5.9  | 5.9  |
| 1  | 1  | 1.4  | 1.4  |
| 6  | 6  | 39   | 39   |
| 3  | 3  | 17.3 | 17.3 |
| 8  | 8  | 13.1 | 13.1 |

|    |    |      |      |
|----|----|------|------|
| 2  | 2  | 6.7  | 6.7  |
| 10 | 10 | 27.5 | 27.5 |
| 15 | 15 | 44.8 | 44.8 |
| 1  | 1  | 3.1  | 3.1  |
| 2  | 2  | 22.4 | 22.4 |
| 9  | 9  | 20.9 | 20.9 |
| 74 | 74 | 72.5 | 72.5 |
| 33 | 33 | 53.3 | 53.3 |
| 14 | 14 | 58.7 | 58.7 |
| 9  | 9  | 39.3 | 39.3 |
| 5  | 5  | 15.5 | 15.5 |
| 65 | 56 | 88.8 | 78.3 |
| 1  | 1  | 8.1  | 8.1  |
| 2  | 2  | 11.9 | 11.9 |
| 5  | 5  | 29.1 | 29.1 |
| 1  | 1  | 3.9  | 3.9  |
| 3  | 3  | 19   | 19   |
| 5  | 5  | 31.9 | 31.9 |
| 20 | 20 | 29.3 | 29.3 |
| 1  | 1  | 3    | 3    |
| 2  | 2  | 4.9  | 4.9  |
| 2  | 2  | 4.7  | 4.7  |
| 3  | 2  | 10.3 | 7.6  |
| 4  | 3  | 12.4 | 9.7  |
| 1  | 1  | 4.5  | 4.5  |
| 6  | 6  | 15.3 | 15.3 |
| 7  | 7  | 35.7 | 35.7 |
| 14 | 14 | 25.2 | 25.2 |
| 1  | 1  | 4.6  | 4.6  |
| 6  | 6  | 4.4  | 4.4  |
| 25 | 25 | 13.8 | 13.8 |
| 5  | 5  | 16.6 | 16.6 |
| 3  | 3  | 13   | 13   |
| 28 | 28 | 70.6 | 70.6 |
| 1  | 1  | 1.1  | 1.1  |
| 1  | 1  | 6.6  | 6.6  |
| 1  | 1  | 0.8  | 0.8  |
| 8  | 8  | 31.1 | 31.1 |
| 7  | 7  | 7.9  | 7.9  |
| 10 | 10 | 13.7 | 13.7 |
| 3  | 3  | 10.3 | 10.3 |

|    |    |      |      |
|----|----|------|------|
| 12 | 12 | 16.2 | 16.2 |
| 1  | 1  | 2    | 2    |
| 6  | 6  | 15.7 | 15.7 |
| 2  | 2  | 9.6  | 9.6  |
| 2  | 2  | 5.5  | 5.5  |
| 2  | 2  | 11.1 | 11.1 |
| 12 | 7  | 47.5 | 36.5 |
| 15 | 13 | 55.7 | 52.5 |
| 12 | 8  | 50.2 | 39.3 |
| 12 | 9  | 41.9 | 37.8 |
| 10 | 6  | 36.6 | 29.2 |
| 20 | 16 | 60   | 53.1 |
| 3  | 3  | 18.3 | 18.3 |
| 1  | 1  | 1.3  | 1.3  |
| 1  | 1  | 5.3  | 5.3  |
| 1  | 1  | 3.3  | 3.3  |
| 2  | 2  | 8.6  | 8.6  |
| 1  | 1  | 2.1  | 2.1  |
| 27 | 27 | 59   | 59   |

| Mol. weight [kDa] | Q-value    | Score  | Intensity   | MS/MS count | Majority protein IDs |
|-------------------|------------|--------|-------------|-------------|----------------------|
| 165.85            | 0          | 323.31 | 17552000000 | 390         | Q61838               |
| 106.91            | 0          | 70.115 | 718330000   | 39          | Q8BGQ7               |
| 44.97             | 0.0087816  | 1.3885 | 45457000    | 4           | Q3THG9               |
| 50.236            | 0          | 91.958 | 694380000   | 44          | P61922-2             |
| 176.16            | 0          | 8.4982 | 71840000    | 10          | Q8K440-2             |
| 170.09            | 0          | 8.2935 | 203340000   | 19          | P70170-3             |
| 75.474            | 0          | 9.26   | 282890000   | 13          | P55096               |
| 67.314            | 0          | 35.318 | 372140000   | 16          | P61222               |
| 94.944            | 0.00043103 | 3.21   | 80464000    | 15          | Q6P542               |
| 33.56             | 0          | 5.5601 | 347770000   | 4           | Q8K4F5               |
| 45.269            | 0          | 13.383 | 475580000   | 33          | Q99LR1               |
| 22.45             | 0          | 49.508 | 1269500000  | 39          | Q8VCR7               |
| 63.085            | 0          | 7.715  | 606330000   | 34          | Q9Z1Q2               |
| 39.154            | 0          | 16.661 | 308130000   | 15          | Q9DBL9               |
| 42.547            | 0          | 5.8146 | 144890000   | 4           | Q8CBW3-5             |
| 62.003            | 0.00043879 | 3.4168 | 68982000    | 8           | Q8K4G5-3             |
| 9.0303            | 0          | 25.861 | 1093700000  | 46          | Q4KML4               |
| 43.953            | 0          | 72.968 | 1584300000  | 71          | Q921H8               |
| 41.829            | 0          | 323.31 | 25554000000 | 425         | Q8BWT1               |
| 265.25            | 0          | 246.18 | 2548600000  | 84          | Q5SWU9               |
| 118.98            | 0          | 7.3858 | 120750000   | 3           | Q8K370               |
| 68.721            | 0.00041876 | 2.8853 | 190880000   | 7           | Q8JZN5               |
| 47.907            | 0          | 322.03 | 13453000000 | 274         | P51174               |
| 46.481            | 0          | 202.09 | 14705000000 | 181         | P45952               |
| 44.889            | 0          | 73.325 | 5049600000  | 122         | Q07417               |
| 47.874            | 0          | 120.27 | 1369300000  | 59          | Q9DBL1               |
| 70.875            | 0          | 323.31 | 11258000000 | 279         | P50544               |
| 221.94            | 0          | 200.94 | 7890300000  | 173         | Q61282               |
| 44.816            | 0          | 321.69 | 16308000000 | 252         | Q8QZT1               |
| 41.297            | 0          | 61.287 | 1131100000  | 68          | Q8CAY6               |
| 150.92            | 0          | 226.36 | 10114000000 | 380         | P09470               |
| 65.356            | 0          | 6.0731 | 158370000   | 4           | Q9JIX8-3             |
| 119.73            | 0          | 317.91 | 10992000000 | 277         | Q91V92               |
| 98.124            | 0          | 97.255 | 3101800000  | 123         | P28271               |
| 85.462            | 0          | 323.31 | 41315000000 | 764         | Q99KI0               |
| 67.354            | 0          | 31.722 | 347130000   | 10          | Q8VHQ9               |
| 15.183            | 0          | 30.075 | 660590000   | 34          | Q9CQR4               |
| 49.656            | 0          | 78.74  | 1339300000  | 64          | Q9QYR9               |

|        |            |        |             |      |          |
|--------|------------|--------|-------------|------|----------|
| 37.555 | 0.00043197 | 3.2323 | 155120000   | 7    | Q91V12-2 |
| 50.56  | 0          | 55.087 | 2696200000  | 105  | Q9R0X4   |
| 17.941 | 0          | 21.217 | 915020000   | 36   | Q9D358-2 |
| 67.95  | 0          | 13.979 | 138030000   | 11   | Q8VCW8   |
| 65.076 | 0          | 5.0836 | 31704000    | 2    | Q3URE1   |
| 77.951 | 0          | 238.92 | 10622000000 | 289  | P41216   |
| 76.205 | 0          | 23.891 | 211680000   | 8    | Q8JZR0   |
| 42.009 | 0          | 14.074 | 1.2754E+11  | 184  | P62737   |
| 41.736 | 0          | 77.927 | 7413900000  | 84   | P60710   |
| 42.019 | 0          | 323.31 | 1.3397E+12  | 4093 | P68033   |
| 41.792 | 0          | 323.31 | 3.6943E+11  | 1501 | P63260   |
| 47.447 | 0          | 5.8253 | 143820000   | 3    | Q9Z2N8   |
| 103.07 | 0          | 323.31 | 1.5276E+11  | 1489 | Q7TPR4   |
| 104.98 | 0          | 323.31 | 19968000000 | 447  | P57780   |
| 46.207 | 0          | 147.06 | 411790000   | 25   | Q9QZB7   |
| 42.613 | 0          | 48.096 | 930670000   | 39   | P61164   |
| 42.281 | 0          | 66.664 | 3863900000  | 122  | Q8R5C5   |
| 44.76  | 0          | 269.62 | 8659700000  | 173  | P61161   |
| 47.357 | 0          | 145    | 17154000000 | 195  | Q99JY9   |
| 11.241 | 0          | 5.8262 | 455300000   | 15   | P56376   |
| 83.967 | 0.0087848  | 1.3913 | 43386000    | 2    | O35598   |
| 113.22 | 0          | 4.3236 | 103560000   | 8    | Q80T21   |
| 71.742 | 0          | 21.354 | 819370000   | 45   | Q60936   |
| 139.12 | 0          | 33.404 | 962190000   | 50   | P84309   |
| 122.71 | 0.0077548  | 1.4666 | 64142000    | 1    | P51829   |
| 69.886 | 0          | 106.43 | 1529800000  | 61   | Q9QYC0-2 |
| 75.406 | 0          | 15.15  | 237560000   | 18   | Q9QYB5-2 |
| 39.771 | 0          | 14.28  | 816650000   | 46   | P00329   |
| 39.547 | 0          | 132.09 | 2964300000  | 129  | P28474   |
| 39.904 | 0          | 7.1263 | 181970000   | 11   | Q64437   |
| 26.809 | 0          | 7.966  | 577600000   | 19   | Q60994   |
| 40.148 | 0          | 66.045 | 1525900000  | 39   | P55264   |
| 53.774 | 0.00042535 | 3.0721 | 77677000    | 9    | Q8VDL4-3 |
| 79.656 | 0          | 5.1777 | 76555000    | 6    | Q3UYH7   |
| 42.06  | 0          | 3.5472 | 34911000    | 5    | Q9JKV1   |
| 54.866 | 0          | 76.724 | 1327600000  | 81   | P54822   |
| 50.254 | 0          | 6.0511 | 107060000   | 2    | P28650   |
| 128.36 | 0          | 245.88 | 9597600000  | 282  | Q640N1   |
| 89.518 | 0          | 5.4691 | 192010000   | 17   | Q8JZQ2   |
| 49.275 | 0.0035322  | 2.0645 | 13872000    | 2    | O89020-2 |
| 27.072 | 0          | 8.2727 | 170700000   | 18   | Q3UPL5   |



|        |            |        |             |      |          |
|--------|------------|--------|-------------|------|----------|
| 37.022 | 0.0035447  | 2.0961 | 63154000    | 2    | Q64191   |
| 18.899 | 0          | 21.892 | 275150000   | 7    | Q9ESW4-2 |
| 97.303 | 0          | 11.514 | 329720000   | 11   | Q8CJG0   |
| 31.01  | 0          | 7.8844 | 193610000   | 4    | Q8K3K7   |
| 198.33 | 0          | 47.847 | 1138300000  | 72   | A2ASQ1-3 |
| 47.688 | 0          | 55.106 | 2295500000  | 64   | P50247   |
| 58.951 | 0          | 8.1928 | 353570000   | 16   | Q80SW1   |
| 38.117 | 0          | 7.2044 | 327480000   | 6    | Q8BK64   |
| 37.325 | 0          | 158.85 | 15976000000 | 102  | P29699   |
| 66.765 | 0          | 22.351 | 570350000   | 14   | Q9Z0X1   |
| 40.634 | 0          | 5.6663 | 129530000   | 1    | Q8BUE4   |
| 33.997 | 0          | 28.86  | 872330000   | 37   | P31230   |
| 35.377 | 0          | 15.902 | 412840000   | 36   | Q8R010   |
| 37.605 | 0          | 12.032 | 236490000   | 8    | O08915   |
| 21.539 | 0          | 138.84 | 5216900000  | 120  | Q9R0Y5   |
| 25.605 | 0          | 104    | 3388400000  | 92   | Q9WTP6-2 |
| 25.426 | 0          | 61.923 | 4048300000  | 138  | Q9WTP7   |
| 169.74 | 0          | 46.389 | 1217100000  | 39   | Q9WTQ5-2 |
| 36.586 | 0          | 132.49 | 3677900000  | 112  | Q9JII6   |
| 35.732 | 0          | 54.028 | 6631900000  | 141  | P45376   |
| 35.988 | 0          | 5.2726 | 325260000   | 16   | P21300   |
| 36.12  | 0          | 11.416 | 902890000   | 22   | P45377   |
| 40.612 | 0          | 18.706 | 663090000   | 26   | Q8CG76   |
| 27.483 | 0.0067265  | 1.5497 | 124670000   | 10   | Q9D1F4   |
| 36.023 | 0          | 18.85  | 266750000   | 10   | P10518   |
| 68.692 | 0          | 323.31 | 3.5689E+11  | 2241 | P07724   |
| 65.091 | 0          | 15.397 | 518510000   | 27   | Q61490   |
| 84.755 | 0.0016168  | 2.477  | 30289000    | 12   | Q571I9   |
| 87.052 | 0.00042992 | 3.1812 | 66509000    | 7    | Q9Z110-2 |
| 54.467 | 0          | 28.214 | 245350000   | 14   | P24549   |
| 101.59 | 0          | 11.011 | 125130000   | 10   | Q8K009   |
| 56.537 | 0          | 323.31 | 40297000000 | 551  | P47738   |
| 53.97  | 0          | 24.167 | 1541400000  | 73   | P47740   |
| 61.84  | 0          | 79.723 | 703840000   | 55   | Q8CHT0   |
| 55.968 | 0.00041374 | 2.7667 | 88961000    | 5    | Q8BWF0   |
| 57.915 | 0          | 180.08 | 6345000000  | 152  | Q9EQ20   |
| 55.644 | 0          | 103.66 | 2918100000  | 83   | Q9DBF1-2 |
| 53.514 | 0          | 63.243 | 1496000000  | 77   | Q9JLJ2   |
| 39.355 | 0          | 295.16 | 21083000000 | 421  | P05064   |
| 47.404 | 0          | 5.0584 | 50903000    | 4    | Q9DBE8   |
| 18.136 | 0.0063838  | 1.5803 | 31480000    | 3    | P30355   |

|        |            |        |             |     |          |
|--------|------------|--------|-------------|-----|----------|
| 17.682 | 0          | 4.5879 | 419140000   | 16  | O08583-2 |
| 215.99 | 0          | 6.3528 | 110680000   | 2   | P53995   |
| 192.03 | 0          | 178.05 | 3561500000  | 129 | Q02357-5 |
| 426.26 | 0          | 7.6955 | 238370000   | 20  | Q8C8R3   |
| 128.65 | 0          | 33.897 | 141760000   | 9   | Q810B6   |
| 69.262 | 0          | 9.7832 | 361280000   | 23  | Q8BH79-2 |
| 106.25 | 0          | 17.007 | 679780000   | 29  | Q6P9J9   |
| 28.537 | 0          | 80.802 | 800730000   | 39  | O35381   |
| 31.078 | 0          | 9.4119 | 752680000   | 23  | Q9EST5   |
| 28.245 | 0          | 11.978 | 820600000   | 19  | P97822-2 |
| 109.65 | 0          | 323.31 | 8430300000  | 343 | P97449   |
| 38.734 | 0          | 177.47 | 19782000000 | 337 | P10107   |
| 54.079 | 0          | 126.84 | 6669000000  | 139 | P97384   |
| 38.676 | 0          | 323.31 | 87976000000 | 548 | P07356   |
| 36.384 | 0          | 165.99 | 11342000000 | 194 | O35639   |
| 35.915 | 0          | 242.93 | 4763700000  | 127 | P97429   |
| 35.752 | 0          | 262.33 | 51234000000 | 554 | P48036   |
| 75.884 | 0          | 323.31 | 73210000000 | 992 | P14824   |
| 49.925 | 0          | 57.734 | 5135400000  | 87  | Q07076   |
| 84.533 | 0          | 323.31 | 79048000000 | 857 | O70423   |
| 146.68 | 0          | 5.0626 | 205490000   | 4   | O54754   |
| 103.93 | 0          | 21.135 | 671040000   | 36  | O35643   |
| 91.349 | 0          | 8.0562 | 198290000   | 14  | P22892   |
| 105.48 | 0          | 102.29 | 3431600000  | 108 | P17426-2 |
| 104.02 | 0          | 178.7  | 5882200000  | 220 | P17427   |
| 104.58 | 0          | 202.67 | 6565600000  | 275 | Q9DBG3   |
| 49.654 | 0          | 43.826 | 2394900000  | 67  | P84091   |
| 17.018 | 0.00043122 | 3.2121 | 551820000   | 18  | P62743   |
| 122.74 | 0          | 15.687 | 401640000   | 24  | Q9Z1T1   |
| 135.08 | 0          | 5.0933 | 161930000   | 4   | O54774   |
| 79.964 | 0          | 10.173 | 183470000   | 2   | Q8R146-2 |
| 35.49  | 0          | 13.165 | 295140000   | 25  | P28352   |
| 56.784 | 0          | 37.592 | 551020000   | 24  | O35841   |
| 46.434 | 0          | 17.658 | 461590000   | 11  | Q9D7N9   |
| 30.615 | 0          | 128.01 | 8805600000  | 210 | Q00623   |
| 30.972 | 0          | 59.131 | 3553400000  | 72  | Q8K4Z3   |
| 11.309 | 0          | 32.094 | 740480000   | 27  | P09813   |
| 45.029 | 0          | 65.078 | 3369600000  | 75  | P06728   |
| 9.6963 | 0.0081121  | 1.439  | 435490000   | 2   | P34928   |
| 10.741 | 0          | 29.216 | 228390000   | 3   | Q05020   |
| 35.866 | 0          | 15.403 | 796730000   | 37  | P08226   |

|        |            |        |             |     |          |
|--------|------------|--------|-------------|-----|----------|
| 38.618 | 0          | 39.032 | 3683600000  | 127 | Q01339   |
| 18.798 | 0          | 18.082 | 160450000   | 6   | Q9DCZ4-2 |
| 29.26  | 0          | 30.903 | 591380000   | 27  | Q78IK4   |
| 82.967 | 0          | 21.336 | 753160000   | 45  | P12023-3 |
| 79.327 | 0          | 25.957 | 549870000   | 33  | Q8K3H0   |
| 19.724 | 0          | 15.864 | 919320000   | 60  | P08030   |
| 28.793 | 0          | 80.105 | 2279300000  | 33  | Q02013   |
| 57.229 | 0          | 30.12  | 922780000   | 36  | Q5XJY5   |
| 20.697 | 0          | 104.8  | 4860500000  | 132 | P84078   |
| 20.746 | 0.00042409 | 3.0274 | 104670000   | 15  | Q8BSL7   |
| 20.396 | 0          | 67.909 | 2463500000  | 51  | P61750   |
| 20.529 | 0          | 7.779  | 187750000   | 15  | P84084   |
| 20.082 | 0          | 4.5485 | 121240000   | 3   | P62331   |
| 202.24 | 0          | 8.3954 | 52942000    | 3   | A2A5R2   |
| 50.41  | 0          | 78.682 | 2348700000  | 97  | Q5FWK3   |
| 79.818 | 0          | 12.812 | 168870000   | 12  | Q3UIA2-4 |
| 229.72 | 0.0057143  | 1.6988 | 4568700000  | 1   | Q811P8   |
| 23.407 | 0          | 94.112 | 8915400000  | 137 | Q99PT1   |
| 22.851 | 0          | 15.422 | 290520000   | 14  | Q61599   |
| 108.53 | 0          | 9.5104 | 370720000   | 24  | Q60875-5 |
| 79.695 | 0          | 7.4201 | 218250000   | 9   | Q9ES28-8 |
| 20.411 | 0          | 49.835 | 391790000   | 19  | P61211   |
| 20.486 | 0          | 13.894 | 871350000   | 32  | Q9WUL7   |
| 23.437 | 0.00041459 | 2.7848 | 148050000   | 14  | Q9JKW0   |
| 21.557 | 0          | 80.777 | 1668800000  | 102 | Q8R5J9   |
| 21.539 | 0          | 33.235 | 800430000   | 40  | Q9CQW2   |
| 31.246 | 0.00043802 | 3.4071 | 290410000   | 4   | Q9D7A8   |
| 41.063 | 0          | 91.169 | 8116500000  | 128 | Q9WV32   |
| 34.357 | 0          | 107.78 | 4653200000  | 177 | Q9CVB6   |
| 20.524 | 0          | 33.243 | 5356800000  | 142 | Q9JM76   |
| 19.667 | 0          | 125.63 | 8106100000  | 135 | P59999   |
| 16.288 | 0          | 7.0956 | 1052300000  | 17  | Q9CPW4   |
| 16.98  | 0          | 13.594 | 685420000   | 17  | Q9D898   |
| 44.669 | 0          | 39.578 | 956110000   | 64  | Q9WV54   |
| 51.739 | 0          | 37.096 | 342540000   | 21  | Q91YI0   |
| 38.822 | 0          | 7.3528 | 359240000   | 7   | O54984   |
| 83.041 | 0          | 74.028 | 1623500000  | 67  | Q8BSY0   |
| 42.572 | 0          | 308.94 | 65270000000 | 694 | Q99MQ4   |
| 33.95  | 0.00041442 | 2.7843 | 72788000    | 13  | Q8C0M9   |
| 57.428 | 0          | 4.7269 | 119490000   | 16  | Q925I1-2 |
| 32.402 | 0          | 4.8567 | 156640000   | 3   | Q99J83   |

|        |            |        |             |     |          |
|--------|------------|--------|-------------|-----|----------|
| 77.519 | 0          | 10.343 | 135880000   | 14  | Q9D906   |
| 64.217 | 0          | 157.84 | 4762600000  | 195 | Q9CWJ9   |
| 66.223 | 0.00042882 | 3.1637 | 199640000   | 14  | Q6PA06   |
| 60.574 | 0          | 212.36 | 6599200000  | 214 | Q91YH5   |
| 7.3384 | 0          | 42.984 | 1783800000  | 64  | O08997   |
| 112.98 | 0          | 100.17 | 4232600000  | 175 | Q8VDN2   |
| 112.22 | 0          | 18.847 | 1038800000  | 51  | Q6PIE5   |
| 35.194 | 0          | 11.246 | 505120000   | 20  | P14094   |
| 31.775 | 0          | 14.342 | 1219700000  | 29  | P97370   |
| 109.75 | 0          | 192.37 | 4855800000  | 188 | O55143-2 |
| 112.3  | 0          | 19.965 | 319540000   | 17  | Q64518-3 |
| 134.75 | 0.00041528 | 2.7916 | 60779000    | 9   | G5E829   |
| 122.29 | 0          | 54.812 | 1880100000  | 94  | Q6Q477-2 |
| 59.752 | 0          | 323.31 | 43839000000 | 520 | Q03265   |
| 56.3   | 0          | 323.31 | 82640000000 | 832 | P56480   |
| 32.886 | 0          | 92.378 | 3902200000  | 100 | Q91VR2   |
| 28.948 | 0          | 28.853 | 5653400000  | 81  | Q9CQQ7   |
| 18.749 | 0          | 91.949 | 4442900000  | 127 | Q9DCX2   |
| 8.2355 | 0          | 8.5163 | 902860000   | 34  | Q06185   |
| 12.496 | 0.00041511 | 2.7853 | 237230000   | 7   | P97450   |
| 10.344 | 0          | 16.801 | 2469500000  | 39  | P56135   |
| 11.424 | 0          | 18.964 | 2098000000  | 74  | Q9CPQ8   |
| 23.363 | 0          | 137.93 | 14384000000 | 214 | Q9DB20   |
| 95.622 | 0.0020088  | 2.3841 | 39729000    | 6   | Q9Z1G4-3 |
| 40.301 | 0          | 6.4183 | 336640000   | 11  | P51863   |
| 68.325 | 0          | 94.554 | 1232900000  | 49  | P50516   |
| 56.55  | 0          | 3.9674 | 65807000    | 7   | P62814   |
| 26.157 | 0          | 28.674 | 332600000   | 11  | P50518   |
| 53.706 | 0          | 5.0238 | 120840000   | 11  | P28658   |
| 33.395 | 0          | 4.1173 | 173830000   | 6   | Q9JLZ3   |
| 98.19  | 0          | 6.4731 | 221160000   | 10  | Q00993   |
| 13.779 | 0          | 11.851 | 690850000   | 13  | P01887   |
| 41.909 | 0.0042373  | 1.8319 | 78502000    | 12  | Q9Z2Y2   |
| 61.859 | 0          | 18.068 | 843580000   | 38  | Q9JLV1   |
| 50.942 | 0          | 4.3363 | 74518000    | 9   | Q8CI32   |
| 121.04 | 0          | 21.853 | 385230000   | 38  | Q9Z1R2   |
| 10.102 | 0          | 30.407 | 6015400000  | 84  | O54962   |
| 21.394 | 0          | 6.0397 | 193390000   | 4   | Q07813   |
| 67.669 | 0          | 169.69 | 9655800000  | 214 | Q9R069   |
| 94.391 | 0          | 6.7535 | 24007000    | 1   | Q61140-2 |
| 101.02 | 0.00081633 | 2.5794 | 72911000    | 11  | Q8CCN5   |

|        |            |        |             |      |          |
|--------|------------|--------|-------------|------|----------|
| 44.127 | 0          | 71.429 | 1984300000  | 51   | O35855   |
| 50.37  | 0          | 28.293 | 366370000   | 25   | P50136   |
| 35.504 | 0          | 7.3681 | 432230000   | 14   | Q6P3A8-2 |
| 46.587 | 0          | 6.2511 | 132130000   | 7    | O55028   |
| 41.639 | 0          | 323.31 | 1.2076E+11  | 1030 | P28653   |
| 52.511 | 0          | 28.471 | 902030000   | 26   | Q8R016   |
| 33.524 | 0          | 34.597 | 764750000   | 17   | Q9CY64   |
| 22.197 | 0          | 47.566 | 1099800000  | 70   | Q923D2   |
| 29.978 | 0.0042275  | 1.7903 | 25303000    | 6    | P15327   |
| 32.851 | 0          | 13.836 | 911070000   | 36   | Q8R164   |
| 33.196 | 0          | 18.027 | 664170000   | 29   | Q9Z0S1   |
| 28.09  | 0.0016201  | 2.506  | 27761000    | 3    | Q8K3W0-4 |
| 11.832 | 0          | 89.453 | 118560000   | 1    | Q8K2Q7-2 |
| 17.699 | 0          | 6.1045 | 51822000    | 1    | Q64152-2 |
| 76.437 | 0          | 4.0872 | 41405000    | 8    | P35991   |
| 169.9  | 0.00041649 | 2.823  | 1274600000  | 13   | Q7TNF8-2 |
| 31.013 | 0          | 46.311 | 1103600000  | 26   | O35658   |
| 186.48 | 0          | 117.61 | 4463800000  | 206  | P01027   |
| 192.91 | 0          | 141.97 | 3991300000  | 112  | P01029   |
| 51.523 | 0.00081766 | 2.5987 | 1805700000  | 40   | P08607   |
| 188.88 | 0          | 5.9504 | 135690000   | 19   | P06684   |
| 62.002 | 0.00041894 | 2.8875 | 73964000    | 2    | P06683   |
| 28.33  | 0          | 6.1149 | 303280000   | 20   | P13634   |
| 29.032 | 0          | 135.15 | 4822100000  | 130  | P00920   |
| 29.366 | 0          | 249.06 | 14412000000 | 304  | P16015   |
| 39.842 | 0          | 56.197 | 1240100000  | 74   | Q06138   |
| 121.96 | 0          | 92.052 | 4639400000  | 113  | O08532-3 |
| 26.51  | 0          | 8.3966 | 127430000   | 11   | Q9CXW3   |
| 235.85 | 0          | 9.5059 | 153500000   | 11   | B2RQC6-2 |
| 16.837 | 0          | 168.53 | 3732400000  | 63   | P0DP28   |
| 47.994 | 0          | 99.441 | 5250700000  | 128  | P14211   |
| 37.063 | 0          | 21.87  | 435350000   | 10   | O35887   |
| 41.624 | 0          | 5.7082 | 282090000   | 28   | Q91YS8   |
| 54.113 | 0          | 110.87 | 4761900000  | 118  | Q6PHZ2-2 |
| 55.96  | 0          | 71.222 | 1998000000  | 77   | Q923T9-3 |
| 32.542 | 0          | 4.9167 | 82662000    | 4    | P49070   |
| 136.33 | 0          | 250.77 | 7382500000  | 265  | Q6ZQ38   |
| 67.277 | 0          | 116.84 | 7884300000  | 143  | P35564   |
| 51.564 | 0          | 323.31 | 38732000000 | 356  | P40124   |
| 52.861 | 0          | 83.638 | 3087900000  | 85   | Q9CYT6   |
| 39.24  | 0          | 55.406 | 967270000   | 41   | P24452   |

|        |            |        |             |     |          |
|--------|------------|--------|-------------|-----|----------|
| 82.105 | 0          | 28.901 | 549380000   | 19  | O35350   |
| 79.871 | 0          | 212.51 | 10122000000 | 253 | O08529   |
| 28.463 | 0          | 209.04 | 11355000000 | 200 | O88456   |
| 78.168 | 0          | 3.745  | 83205000    | 11  | Q60865   |
| 32.939 | 0          | 22.002 | 816170000   | 17  | P47753   |
| 32.967 | 0          | 80.94  | 5045900000  | 83  | P47754   |
| 30.628 | 0          | 77.176 | 4512300000  | 95  | P47757-2 |
| 16.062 | 0          | 8.5806 | 551710000   | 10  | Q9CR86   |
| 35.217 | 0          | 59.254 | 1364200000  | 52  | Q9CZ42-3 |
| 32.151 | 0.00043611 | 3.3341 | 114510000   | 15  | Q9CZ42-2 |
| 63.459 | 0.0027679  | 2.1941 | 82351000    | 6   | Q9WVG6-2 |
| 85.55  | 0.00043271 | 3.2532 | 9353300     | 1   | Q9ER72-2 |
| 55.356 | 0.0027756  | 2.2278 | 27222000    | 2   | O89110   |
| 46.377 | 0          | 12.282 | 7561700000  | 20  | O09165   |
| 79.694 | 0          | 17.254 | 485640000   | 29  | P51125-3 |
| 59.795 | 0          | 98.574 | 897480000   | 38  | P24270   |
| 20.538 | 0          | 80.794 | 13977000000 | 179 | P49817   |
| 18.227 | 0          | 15.962 | 1280300000  | 56  | Q9WVC3   |
| 30.641 | 0          | 43.949 | 1731700000  | 53  | P48758   |
| 25.958 | 0          | 308.75 | 27009000000 | 263 | P08074   |
| 30.953 | 0          | 9.1695 | 357050000   | 21  | Q8K354   |
| 124.74 | 0          | 4.8882 | 108580000   | 3   | Q8CH18-3 |
| 103    | 0          | 6.2704 | 72515000    | 10  | Q8VDP4   |
| 47.32  | 0          | 5.7362 | 130460000   | 16  | Q71RI9-2 |
| 19.152 | 0          | 5.6912 | 68988000    | 1   | Q3TC33-2 |
| 54.865 | 0          | 16.331 | 614280000   | 28  | Q9D024-2 |
| 107.61 | 0          | 20.111 | 561980000   | 34  | Q8R2G6   |
| 29.596 | 0          | 25.368 | 1045300000  | 9   | Q8C3X2   |
| 36.561 | 0          | 4.8234 | 52427000    | 7   | Q8BGU5-2 |
| 57.477 | 0          | 143    | 6642700000  | 194 | P80314   |
| 60.629 | 0          | 97.761 | 4136800000  | 187 | P80318   |
| 58.066 | 0          | 98.794 | 2783200000  | 117 | P80315   |
| 59.623 | 0          | 206.81 | 4974100000  | 155 | P80316   |
| 58.004 | 0          | 101.37 | 3175800000  | 121 | P80317   |
| 59.652 | 0          | 99.037 | 3441500000  | 131 | P80313   |
| 59.555 | 0          | 41.912 | 2533500000  | 85  | P42932   |
| 161.66 | 0          | 133.48 | 1400400000  | 74  | Q8R422   |
| 28.246 | 0          | 4.5311 | 636800000   | 7   | O35566   |
| 120.92 | 0          | 6.3005 | 78479000    | 7   | Q2VLH6   |
| 31.256 | 0          | 24.985 | 1579300000  | 73  | O54901   |
| 70.449 | 0          | 6.4296 | 247360000   | 18  | Q9JLQ0   |

|        |            |        |             |     |          |
|--------|------------|--------|-------------|-----|----------|
| 35.262 | 0.001221   | 2.545  | 553350000   | 12  | Q64314-2 |
| 52.697 | 0          | 58.501 | 3943200000  | 91  | Q08857   |
| 39.998 | 0          | 3.4566 | 130900000   | 13  | P15379-2 |
| 33.097 | 0          | 14.222 | 997230000   | 53  | Q61735   |
| 25.814 | 0          | 166.01 | 6394400000  | 64  | P35762   |
| 25.258 | 0          | 107.92 | 4399200000  | 96  | P40240   |
| 80.433 | 0          | 16.934 | 754380000   | 20  | Q9Z0M6-2 |
| 16.782 | 0          | 30.68  | 271710000   | 14  | Q8VCN6   |
| 44.593 | 0          | 13.507 | 699770000   | 35  | Q61081   |
| 21.258 | 0          | 72.23  | 4084500000  | 140 | P60766   |
| 194.75 | 0          | 13.561 | 464570000   | 44  | Q7TT50   |
| 78.185 | 0          | 91.625 | 7199300000  | 172 | Q9WTR5   |
| 88.354 | 0          | 3.8092 | 37397000    | 8   | P97326   |
| 23.599 | 0          | 4.2842 | 34347000    | 3   | Q8VDP6   |
| 158.13 | 0.0035101  | 1.9858 | 71309000    | 2   | Q69ZA1-2 |
| 33.288 | 0          | 4.9745 | 90730000    | 17  | P49615   |
| 51.313 | 0          | 32.321 | 337510000   | 16  | Q99L43   |
| 55.409 | 0          | 17.835 | 301740000   | 26  | Q9Z0H4-2 |
| 27.541 | 0          | 14.211 | 606520000   | 48  | Q9CXS4   |
| 61.055 | 0          | 68.782 | 3334000000  | 103 | P23953   |
| 61.787 | 0          | 228.3  | 13704000000 | 275 | Q8VCT4   |
| 85.004 | 0          | 20.922 | 430520000   | 37  | P04186   |
| 27.985 | 0.003517   | 2.0109 | 206130000   | 4   | P03953-2 |
| 139.14 | 0          | 87.083 | 4622300000  | 141 | P06909   |
| 67.26  | 0          | 5.1683 | 204290000   | 7   | Q61129   |
| 18.559 | 0          | 187.86 | 18439000000 | 262 | P18760   |
| 18.709 | 0          | 36.863 | 1216300000  | 32  | P45591   |
| 26.334 | 0          | 12.578 | 420610000   | 2   | Q9CRB9   |
| 29.852 | 0          | 6.6186 | 320790000   | 10  | Q91VN4   |
| 217.75 | 0          | 14.731 | 415030000   | 27  | Q6PDQ2   |
| 25.219 | 0.001624   | 2.5227 | 189200000   | 14  | Q9CQ10   |
| 24.936 | 0          | 7.2142 | 250040000   | 13  | Q9D8B3   |
| 49.398 | 0.006734   | 1.5515 | 55622000    | 1   | Q99LL3   |
| 21.978 | 0          | 5.5258 | 124790000   | 4   | Q9CY57-3 |
| 12.097 | 0          | 12.153 | 1008400000  | 19  | Q91WS0   |
| 63.691 | 0          | 58.349 | 3007100000  | 118 | Q8BMK4   |
| 42.713 | 0          | 323.31 | 35885000000 | 349 | Q04447   |
| 43.044 | 0          | 98.566 | 2052700000  | 51  | P07310   |
| 167.94 | 0          | 13.658 | 380700000   | 14  | Q80TV8-2 |
| 60.621 | 0.0042324  | 1.7991 | 82092000    | 2   | Q99LI2   |
| 34.595 | 0.00042212 | 2.9791 | 36691000    | 5   | P49300   |

|        |            |        |             |      |          |
|--------|------------|--------|-------------|------|----------|
| 22.257 | 0          | 46.737 | 795520000   | 25   | P43025   |
| 27.013 | 0          | 40.686 | 2951500000  | 103  | Q9Z1Q5   |
| 28.729 | 0          | 223.14 | 10051000000 | 344  | Q9QYB1   |
| 51.425 | 0.00042194 | 2.9706 | 52558000    | 13   | Q99KN9-2 |
| 62.183 | 0          | 6.155  | 89487000    | 12   | Q8BXA5   |
| 23.174 | 0          | 4.0927 | 138930000   | 16   | Q6IRU5-2 |
| 191.55 | 0          | 323.31 | 41377000000 | 991  | Q68FD5   |
| 51.655 | 0          | 130.09 | 2914200000  | 94   | Q06890   |
| 37.548 | 0          | 30.911 | 1315200000  | 37   | Q8R4N0   |
| 27.586 | 0          | 110.34 | 4370900000  | 139  | P21844   |
| 22.165 | 0          | 24.065 | 1003800000  | 42   | Q9DBP5   |
| 18.742 | 0          | 7.1767 | 485530000   | 16   | P53996-2 |
| 52.767 | 0          | 24.025 | 1861500000  | 52   | Q9D1A2   |
| 33.355 | 0          | 323.31 | 1.3822E+11  | 997  | Q08091   |
| 33.155 | 0          | 229.99 | 9851600000  | 111  | Q08093   |
| 36.428 | 0          | 234.12 | 12547000000 | 287  | Q9DAW9   |
| 44.654 | 0          | 47.331 | 296830000   | 11   | P16330-2 |
| 20.767 | 0          | 9.3505 | 91894000    | 2    | Q9QXT0   |
| 28.093 | 0          | 3.4848 | 70658000    | 4    | Q8BQ47   |
| 11.987 | 0.00041477 | 2.785  | 138140000   | 4    | Q9D2R6   |
| 62.022 | 0          | 7.6819 | 173590000   | 5    | Q9DBL7   |
| 206.08 | 0          | 63.894 | 1210200000  | 41   | Q60847-4 |
| 191.36 | 0          | 323.31 | 19690000000 | 511  | Q80X19-2 |
| 140.47 | 0          | 257.72 | 19664000000 | 351  | O35206   |
| 134.2  | 0          | 323.31 | 51640000000 | 572  | P39061-2 |
| 138.03 | 0          | 312.54 | 3.1366E+11  | 716  | P11087   |
| 129.56 | 0          | 190.18 | 1.58E+11    | 547  | Q01149   |
| 131.86 | 0          | 15.937 | 36705000000 | 45   | P28481-2 |
| 138.94 | 0          | 17.752 | 1825800000  | 39   | P08121   |
| 160.68 | 0          | 237.12 | 55197000000 | 472  | P02463   |
| 167.32 | 0          | 260.45 | 42744000000 | 423  | P08122   |
| 161.72 | 0          | 13.841 | 678340000   | 31   | Q9QZS0   |
| 164.09 | 0          | 9.4439 | 248090000   | 2    | Q9QZR9   |
| 183.77 | 0          | 254.5  | 5574100000  | 112  | O88207-2 |
| 145.02 | 0          | 87.62  | 4745200000  | 93   | Q3U962   |
| 108.49 | 0          | 323.31 | 2.216E+11   | 1299 | Q04857   |
| 110.33 | 0          | 323.31 | 1.6492E+11  | 960  | Q02788   |
| 289.57 | 0          | 87.26  | 1660800000  | 63   | A6H584   |
| 246.32 | 0          | 323.31 | 20497000000 | 582  | Q8C6K9   |
| 71.06  | 0          | 6.1355 | 312370000   | 23   | Q8K297   |
| 22.037 | 0          | 12.457 | 150260000   | 13   | Q63829   |



|        |           |        |             |     |          |
|--------|-----------|--------|-------------|-----|----------|
| 21.86  | 0.0060583 | 1.6619 | 32267000    | 7   | Q9CQ02   |
| 21.85  | 0         | 31.388 | 259460000   | 16  | Q8K2Q0   |
| 24.707 | 0         | 55.754 | 656340000   | 30  | Q88587-2 |
| 28.96  | 0         | 4.585  | 111290000   | 11  | Q8BIG7   |
| 138.43 | 0         | 83.807 | 2786300000  | 131 | Q8CIE6   |
| 107.06 | 0         | 73.83  | 1887700000  | 88  | Q9JIF7   |
| 102.45 | 0         | 17.662 | 427670000   | 26  | O55029   |
| 34.567 | 0         | 72.594 | 978920000   | 48  | O89079   |
| 97.512 | 0         | 71.76  | 2250900000  | 109 | Q9QZE5   |
| 97.55  | 0         | 5.0957 | 106020000   | 7   | Q9QXK3-4 |
| 51.596 | 0         | 84.088 | 1632500000  | 80  | P61202   |
| 47.832 | 0         | 28.101 | 835770000   | 26  | O88543   |
| 46.284 | 0         | 24.904 | 466370000   | 47  | O88544   |
| 37.548 | 0         | 8.9075 | 355790000   | 3   | O35864   |
| 35.88  | 0.002769  | 2.1944 | 83388000    | 7   | O88545   |
| 30.224 | 0         | 18.364 | 281780000   | 30  | Q9CZ04   |
| 20.198 | 0         | 9.9118 | 227890000   | 15  | P61924   |
| 21.693 | 0         | 3.6376 | 79417000    | 1   | Q3THF9-2 |
| 51.392 | 0         | 16.651 | 376970000   | 12  | Q8R1S0   |
| 35.082 | 0         | 11.974 | 528740000   | 26  | Q8K1Z0   |
| 50.989 | 0         | 5.0661 | 109050000   | 8   | O89053   |
| 53.912 | 0         | 20.237 | 1304500000  | 59  | Q9WUM3   |
| 53.12  | 0         | 103.74 | 7668900000  | 186 | Q9WUM4   |
| 15.944 | 0         | 5.0826 | 42797000    | 8   | Q9CQI6   |
| 19.53  | 0         | 52.973 | 3848700000  | 77  | P19783   |
| 16.101 | 0         | 119.92 | 12116000000 | 197 | P12787   |
| 13.813 | 0         | 19.876 | 2920300000  | 95  | P19536   |
| 12.352 | 0         | 71.751 | 11673000000 | 92  | P43024   |
| 10.071 | 0         | 32.939 | 5606700000  | 77  | P56391   |
| 8.4689 | 0         | 18.717 | 1912500000  | 37  | Q9CPQ1   |
| 8.9863 | 0         | 6.2094 | 1823700000  | 19  | P56392   |
| 9.2908 | 0         | 13.015 | 1512300000  | 48  | P48771   |
| 7.3325 | 0.0020048 | 2.3519 | 257470000   | 8   | P17665   |
| 121.15 | 0         | 35.358 | 1138200000  | 75  | Q61147   |
| 48.789 | 0         | 75.685 | 4864000000  | 156 | P15089   |
| 53.255 | 0         | 13.861 | 441460000   | 21  | Q00493   |
| 58.886 | 0         | 87.549 | 2242300000  | 69  | Q8C166   |
| 61.035 | 0         | 6.1842 | 173460000   | 14  | P59108   |
| 59.584 | 0         | 93.26  | 2280700000  | 61  | Q8BT60   |
| 49.714 | 0         | 3.4781 | 28798000    | 3   | P36552   |
| 30.333 | 0         | 5.9812 | 75423000    | 3   | Q8BFS6-4 |

|        |            |        |             |     |          |
|--------|------------|--------|-------------|-----|----------|
| 51.813 | 0          | 12.661 | 542450000   | 22  | Q9WVJ3   |
| 59.152 | 0          | 54.861 | 1043500000  | 27  | Q6NVF9   |
| 26.192 | 0          | 10.592 | 377080000   | 18  | Q8BTV2-3 |
| 88.25  | 0          | 13.85  | 472990000   | 30  | P97742   |
| 88.216 | 0          | 25.016 | 783720000   | 49  | Q924X2   |
| 73.98  | 0          | 116.63 | 2433600000  | 96  | P52825   |
| 49.074 | 0.0023866  | 2.2566 | 163080000   | 13  | Q64735-2 |
| 70.839 | 0          | 40.544 | 1047800000  | 55  | P47934   |
| 45.717 | 0          | 5.5301 | 55255000    | 7   | Q91XD7   |
| 8.5497 | 0          | 89.598 | 26443000000 | 98  | P63254   |
| 22.727 | 0          | 154    | 21204000000 | 150 | Q9DCT8   |
| 33.814 | 0          | 17.308 | 854770000   | 27  | Q64010   |
| 33.83  | 0          | 3.5663 | 155910000   | 1   | P47941   |
| 20.069 | 0          | 15.858 | 1420100000  | 44  | P23927   |
| 35.208 | 0          | 19.944 | 737880000   | 25  | Q99KP3   |
| 35.268 | 0          | 4.864  | 292850000   | 12  | P47199   |
| 51.736 | 0          | 323.31 | 30932000000 | 369 | Q9CZU6   |
| 55.144 | 0          | 48.381 | 1365700000  | 71  | Q9DBE0   |
| 110.45 | 0          | 55.993 | 4351900000  | 36  | Q9ERK4   |
| 50.716 | 0          | 4.7119 | 320860000   | 5   | P41241   |
| 37.567 | 0          | 6.3494 | 157920000   | 20  | Q8BK63-2 |
| 45.133 | 0          | 26.277 | 736920000   | 44  | Q60737   |
| 24.942 | 0          | 4.4908 | 300890000   | 10  | P67871   |
| 252.31 | 0          | 323.31 | 12555000000 | 388 | Q8VHY0   |
| 20.583 | 0          | 323.31 | 36528000000 | 237 | P97315   |
| 20.926 | 0          | 181.23 | 21202000000 | 219 | P97314   |
| 15.531 | 0.00041563 | 2.8038 | 83055000    | 3   | P21460   |
| 11.045 | 0          | 15.806 | 1087200000  | 30  | Q62426   |
| 61.341 | 0          | 8.7446 | 231550000   | 11  | Q8BIQ5   |
| 46.614 | 0          | 65.389 | 906220000   | 25  | O88712-2 |
| 83.745 | 0          | 9.3668 | 30274000    | 1   | Q61164   |
| 100.11 | 0          | 83.916 | 1850600000  | 62  | P26231   |
| 100.42 | 0          | 6.4214 | 144480000   | 15  | Q61301-2 |
| 99.802 | 0          | 13.036 | 173080000   | 5   | Q65CL1   |
| 81.462 | 0          | 14.794 | 261780000   | 17  | O88327   |
| 85.47  | 0          | 33.819 | 1491300000  | 51  | Q02248   |
| 64.979 | 0.0027778  | 2.2308 | 47146000    | 7   | Q9CWL8   |
| 101.74 | 0          | 25.498 | 816290000   | 53  | P30999-2 |
| 37.279 | 0          | 59.279 | 1337400000  | 59  | P10605   |
| 44.953 | 0          | 52.623 | 6533000000  | 136 | P18242   |
| 37.17  | 0          | 16.967 | 354440000   | 15  | P49935   |

|        |            |        |             |     |          |
|--------|------------|--------|-------------|-----|----------|
| 61.249 | 0          | 28.215 | 548990000   | 23  | Q60598   |
| 69.84  | 0          | 5.0559 | 148330000   | 2   | Q99LJ0   |
| 89.69  | 0          | 10.735 | 145210000   | 13  | Q9WTX6   |
| 88.947 | 0          | 6.0782 | 197200000   | 21  | Q9JLV5   |
| 87.752 | 0          | 8.0381 | 103160000   | 24  | Q3TCH7   |
| 90.973 | 0          | 10.653 | 172420000   | 11  | Q9D5V5   |
| 18.865 | 0          | 22.108 | 1691500000  | 68  | Q9CQ89   |
| 29.003 | 0.00042034 | 2.9282 | 78093000    | 2   | Q9D8X1   |
| 10.032 | 0          | 9.5733 | 104800000   | 9   | P40224-1 |
| 15.241 | 0          | 12.424 | 747250000   | 20  | P56395   |
| 16.318 | 0          | 21.984 | 409270000   | 12  | Q9CQX2   |
| 34.134 | 0          | 25.084 | 397530000   | 22  | Q9DB73   |
| 31.549 | 0          | 311.38 | 27404000000 | 494 | Q9DCN2-2 |
| 20.921 | 0          | 5.1883 | 239910000   | 20  | Q3TYS2   |
| 29.497 | 0          | 118.79 | 4643400000  | 87  | Q9D0M3-2 |
| 11.605 | 0          | 33.334 | 4541600000  | 72  | P62897   |
| 144.98 | 0          | 31.57  | 1651700000  | 104 | Q7TMB8-2 |
| 21.465 | 0          | 43.183 | 1117200000  | 39  | Q9CX80   |
| 52.149 | 0          | 14.841 | 321150000   | 11  | Q8BKE6   |
| 55.948 | 0.0035143  | 2.0049 | 17082000    | 2   | P33267   |
| 58.9   | 0          | 3.9006 | 52634000    | 2   | Q64462   |
| 28.09  | 0          | 91.171 | 5990200000  | 99  | Q9D172   |
| 122.27 | 0          | 12.37  | 149770000   | 6   | Q8BPM0-2 |
| 58.821 | 0          | 4.8016 | 90225000    | 10  | P98078-3 |
| 96.904 | 0          | 64.945 | 2207200000  | 94  | Q62165   |
| 51.421 | 0          | 8.4826 | 276290000   | 14  | O54784   |
| 57.147 | 0          | 22.012 | 2305600000  | 91  | Q922B2   |
| 43.086 | 0          | 9.1212 | 74977000    | 2   | Q9JII5-2 |
| 10     | 0          | 87.928 | 4022900000  | 69  | P31786   |
| 48.341 | 0          | 16.872 | 716650000   | 29  | Q62418-3 |
| 53.246 | 0          | 41.744 | 2104600000  | 90  | P53395   |
| 39.809 | 0          | 323.31 | 1.2758E+11  | 951 | P28654   |
| 38.988 | 0          | 26.873 | 445770000   | 19  | Q9DAR7   |
| 138.2  | 0          | 58.263 | 1614800000  | 62  | O08788-2 |
| 44.116 | 0          | 79.04  | 2572900000  | 83  | Q99KJ8   |
| 20.978 | 0          | 7.342  | 98773000    | 13  | Q9Z0Y1   |
| 20.14  | 0.00042355 | 3.0083 | 30617000    | 2   | Q9QZB9   |
| 25.746 | 0          | 18.603 | 72305000    | 9   | Q91X52   |
| 29.645 | 0          | 72.344 | 2622000000  | 84  | Q99LD8   |
| 126.85 | 0          | 31.531 | 917980000   | 57  | Q3U1J4   |
| 79.576 | 0.0035363  | 2.0748 | 18456000    | 2   | Q80Y98   |

|        |            |        |             |     |          |
|--------|------------|--------|-------------|-----|----------|
| 49.027 | 0          | 107.46 | 3204100000  | 77  | O54734   |
| 35.977 | 0          | 4.0751 | 287950000   | 3   | Q80WW9   |
| 13.077 | 0          | 65.828 | 3974900000  | 119 | O35215   |
| 82.499 | 0          | 122.42 | 2766700000  | 90  | Q91VR5   |
| 72.399 | 0          | 18.735 | 484670000   | 24  | Q501J6   |
| 93.55  | 0.00043535 | 3.3195 | 112460000   | 6   | Q9JIK5   |
| 42.104 | 0          | 4.5608 | 105500000   | 16  | Q9QY15-2 |
| 49.035 | 0          | 60.223 | 3377700000  | 114 | Q9Z1N5   |
| 73.101 | 0          | 108.58 | 4026200000  | 112 | Q62167   |
| 73.427 | 0          | 12.75  | 350490000   | 6   | Q62095   |
| 101.96 | 0          | 4.6763 | 710250000   | 4   | Q810A7   |
| 116.89 | 0.00042373 | 3.0101 | 61420000    | 4   | Q569Z5-2 |
| 69.289 | 0          | 50.072 | 3039300000  | 110 | Q61656   |
| 82.175 | 0          | 3.8431 | 2009900000  | 9   | Q99MJ9   |
| 54.191 | 0          | 4.8139 | 167630000   | 16  | P54823   |
| 36.213 | 0          | 187.7  | 9157600000  | 197 | Q9CQ62   |
| 43.158 | 0          | 7.6611 | 552420000   | 29  | Q7TNV0   |
| 28.834 | 0          | 11.34  | 226500000   | 17  | Q99J56   |
| 53.497 | 0          | 210.78 | 3981800000  | 112 | P31001   |
| 36.3   | 0          | 25.741 | 691190000   | 23  | Q9DBB8   |
| 34.005 | 0          | 21.861 | 502820000   | 41  | Q99L04   |
| 33.982 | 0          | 5.1587 | 97429000    | 5   | Q99J47-2 |
| 91.006 | 0          | 6.9853 | 212060000   | 14  | O35286   |
| 153.97 | 0          | 3.9336 | 11718000    | 3   | Q6PGC1   |
| 149.47 | 0          | 61.359 | 2392300000  | 92  | O70133   |
| 139.34 | 0          | 14.211 | 131920000   | 11  | O08808   |
| 57.401 | 0          | 3.4735 | 135590000   | 4   | Q9ESX5   |
| 67.941 | 0          | 178.4  | 11245000000 | 224 | Q8BMF4   |
| 54.272 | 0          | 96.568 | 8473700000  | 169 | O08749   |
| 48.994 | 0          | 64.236 | 5495000000  | 78  | Q9D2G2   |
| 425.83 | 0          | 323.31 | 25368000000 | 797 | P11531   |
| 46.531 | 0          | 13.114 | 299440000   | 23  | P54265-4 |
| 44.868 | 0          | 48.96  | 519920000   | 13  | P63037   |
| 45.745 | 0          | 19.507 | 578230000   | 15  | Q9QYJ0   |
| 46.847 | 0          | 13.886 | 178170000   | 4   | Q99M87-3 |
| 37.781 | 0          | 32.978 | 1919700000  | 51  | Q9D832   |
| 90.582 | 0.0023962  | 2.3032 | 157610000   | 10  | Q9DC23   |
| 63.232 | 0          | 13.003 | 243750000   | 16  | Q5U458   |
| 12.436 | 0          | 16.222 | 38977000    | 8   | Q9CQV7   |
| 57.463 | 0          | 17.13  | 241200000   | 11  | Q91YW3   |
| 96.056 | 0.00041408 | 2.77   | 32629000    | 3   | P39053-5 |

|        |            |        |             |     |          |
|--------|------------|--------|-------------|-----|----------|
| 78.01  | 0          | 132.81 | 3212800000  | 178 | Q8K1M6-3 |
| 97.732 | 0          | 59.349 | 2215400000  | 115 | P39054-2 |
| 52.206 | 0          | 49.812 | 1979900000  | 93  | Q9Z2W0   |
| 241.18 | 0          | 17.045 | 325750000   | 12  | Q8R1A4-2 |
| 45.722 | 0          | 318.63 | 11241000000 | 206 | P31428   |
| 82.897 | 0          | 21.064 | 505020000   | 25  | Q99KK7   |
| 56.253 | 0          | 5.4967 | 74634000    | 6   | Q9ET22   |
| 23.995 | 0          | 128.43 | 13189000000 | 158 | Q9QZZ6   |
| 11.213 | 0          | 38.474 | 2129700000  | 58  | Q99LT0   |
| 62.277 | 0          | 320.04 | 17362000000 | 350 | O08553   |
| 61.936 | 0          | 314.51 | 26102000000 | 457 | Q62188   |
| 22.278 | 0.00043459 | 3.3119 | 46152000    | 9   | Q9D6N5   |
| 332.91 | 0          | 27.677 | 555910000   | 18  | E9Q557   |
| 834.21 | 0          | 75.082 | 171230000   | 10  | Q91ZU6   |
| 18.521 | 0          | 203.86 | 70525000000 | 577 | Q9R0P5   |
| 18.05  | 0          | 5.3827 | 56652000    | 4   | Q8BHA3-2 |
| 77.732 | 0          | 83.813 | 2516900000  | 69  | Q9D2N4-2 |
| 24.18  | 0.003506   | 1.9738 | 8164200000  | 11  | Q8K4T5   |
| 20.472 | 0          | 76.342 | 1574500000  | 70  | Q9D7X3   |
| 532.04 | 0          | 323.31 | 23096000000 | 998 | Q9JHU4   |
| 68.393 | 0          | 88.21  | 412850000   | 10  | O88487   |
| 56.614 | 0          | 62.991 | 1215100000  | 36  | Q8R1Q8   |
| 10.366 | 0          | 14.854 | 5606500000  | 69  | P63168   |
| 10.99  | 0          | 16.131 | 901600000   | 20  | P62627   |
| 12.483 | 0.00043592 | 3.3234 | 61113000    | 6   | P51807   |
| 12.957 | 0          | 27.907 | 277530000   | 13  | P56387   |
| 235.9  | 0          | 44.735 | 1105200000  | 40  | Q9ESD7-3 |
| 36.118 | 0          | 134.36 | 1398900000  | 51  | O35459   |
| 28.824 | 0          | 16.154 | 68011000    | 3   | Q3TLP5-2 |
| 31.474 | 0          | 147.61 | 6572700000  | 113 | Q8BH95   |
| 32.25  | 0          | 147.96 | 6965100000  | 98  | P42125   |
| 39.503 | 0          | 20.547 | 496340000   | 31  | Q9WUR2-2 |
| 62.832 | 0          | 21.03  | 1228200000  | 28  | Q61508   |
| 203.91 | 0          | 15.852 | 502260000   | 19  | Q6PDI5-2 |
| 49.798 | 0          | 4.0994 | 67244000    | 1   | Q9QZH6   |
| 50.113 | 0          | 319.08 | 73565000000 | 514 | P10126   |
| 24.693 | 0          | 34.682 | 2536000000  | 61  | O70251   |
| 31.293 | 0          | 67.039 | 1858700000  | 50  | P57776   |
| 19.859 | 0.00043403 | 3.2945 | 80603000    | 4   | Q9D1M4   |
| 50.06  | 0          | 88.619 | 5164200000  | 100 | Q9D8N0   |
| 95.313 | 0          | 323.31 | 22863000000 | 571 | P58252   |

|        |   |        |             |      |          |
|--------|---|--------|-------------|------|----------|
| 54.952 | 0 | 70.472 | 5337200000  | 163  | Q8BPB5   |
| 49.425 | 0 | 157.08 | 3717300000  | 85   | Q9WVJ9   |
| 26.999 | 0 | 19.789 | 535040000   | 28   | Q9D4J1   |
| 26.791 | 0 | 5.2647 | 194490000   | 20   | Q9D8Y0   |
| 92.612 | 0 | 9.9338 | 187510000   | 6    | Q8BG67   |
| 109.36 | 0 | 12.3   | 509680000   | 27   | O08810   |
| 134.85 | 0 | 19.407 | 304630000   | 19   | Q01279   |
| 83.947 | 0 | 43.626 | 225600000   | 14   | Q99MS7-4 |
| 60.602 | 0 | 99.506 | 5381200000  | 171  | Q9WVK4   |
| 61.174 | 0 | 323.31 | 91289000000 | 1041 | Q8BH64   |
| 60.82  | 0 | 22.032 | 214290000   | 18   | Q9QXY6   |
| 61.48  | 0 | 156.64 | 7917600000  | 275  | Q9EQP2   |
| 36.108 | 0 | 13.206 | 531630000   | 14   | Q6ZWX6   |
| 51.065 | 0 | 9.7172 | 531720000   | 39   | Q9Z0N1   |
| 161.93 | 0 | 35.11  | 1880100000  | 98   | P23116   |
| 91.369 | 0 | 9.5342 | 398090000   | 23   | Q8JZQ9   |
| 105.53 | 0 | 23.791 | 805110000   | 39   | Q8R1B4   |
| 63.988 | 0 | 40.942 | 447820000   | 13   | O70194   |
| 52.22  | 0 | 23.952 | 463820000   | 43   | P60229   |
| 37.984 | 0 | 52.338 | 1951100000  | 71   | Q9DCH4   |
| 35.638 | 0 | 4.4639 | 219090000   | 9    | Q9Z1D1   |
| 39.832 | 0 | 10.558 | 318010000   | 8    | Q91WK2   |
| 29.343 | 0 | 7.592  | 320400000   | 16   | Q3UGC7   |
| 21.307 | 0 | 4.5533 | 257150000   | 14   | Q9DBZ5-2 |
| 66.612 | 0 | 40.252 | 323320000   | 35   | Q8QZY1   |
| 42.516 | 0 | 62.679 | 651050000   | 44   | Q99JX4   |
| 46.153 | 0 | 97.639 | 5434300000  | 160  | P60843   |
| 46.402 | 0 | 25.282 | 574090000   | 26   | P10630   |
| 46.839 | 0 | 7.4801 | 627410000   | 16   | Q91VC3   |
| 68.839 | 0 | 101.05 | 1241400000  | 27   | Q8BGD9   |
| 25.053 | 0 | 5.6181 | 295110000   | 21   | P63073   |
| 174.58 | 0 | 19.148 | 640710000   | 49   | Q6NZJ6-2 |
| 97.893 | 0 | 14.792 | 464340000   | 19   | Q62448-2 |
| 25.186 | 0 | 24.883 | 1024000000  | 13   | Q9WUK2-2 |
| 48.968 | 0 | 25.615 | 640680000   | 46   | P59325   |
| 16.832 | 0 | 123.54 | 5225400000  | 126  | P63242   |
| 137.61 | 0 | 34.396 | 525050000   | 10   | Q05D44   |
| 36.169 | 0 | 32.078 | 937620000   | 53   | P70372   |
| 71.937 | 0 | 249.95 | 55314000000 | 366  | P54320   |
| 32.677 | 0 | 18.215 | 864940000   | 17   | Q9JLJ5   |
| 111.29 | 0 | 11.086 | 316110000   | 23   | Q8C7X2-2 |

|        |            |        |             |     |          |
|--------|------------|--------|-------------|-----|----------|
| 23.348 | 0          | 5.2773 | 153110000   | 12  | O70378   |
| 29.435 | 0          | 36.636 | 1513000000  | 25  | O08579   |
| 107.58 | 0          | 293.9  | 15663000000 | 291 | Q99K41   |
| 86.41  | 0          | 57.953 | 2500500000  | 98  | Q05BC3-2 |
| 70.733 | 0          | 91.195 | 3018300000  | 113 | Q7TNG5   |
| 56.356 | 0          | 162.2  | 5525600000  | 125 | Q03173-6 |
| 55.262 | 0          | 60.763 | 3679700000  | 117 | Q8C522   |
| 47.14  | 0          | 323.31 | 30832000000 | 475 | P17182   |
| 47.296 | 0          | 7.5293 | 48377000    | 2   | P17183   |
| 47.024 | 0          | 12.209 | 312260000   | 16  | P21550   |
| 107.96 | 0          | 56.515 | 1605800000  | 53  | P16406   |
| 103.08 | 0          | 11.149 | 305640000   | 13  | P06802-2 |
| 98.661 | 0          | 15.632 | 497000000   | 39  | Q6DYE8   |
| 47.903 | 0.00041806 | 2.8713 | 46553000    | 12  | Q8BTJ4-2 |
| 57.205 | 0          | 175.61 | 4164000000  | 140 | P55772   |
| 54.319 | 0          | 147.67 | 13583000000 | 198 | O55026   |
| 89.663 | 0          | 11.205 | 340320000   | 12  | P48193-2 |
| 109.94 | 0          | 23.776 | 871010000   | 24  | O70318   |
| 52.576 | 0          | 125.73 | 10303000000 | 309 | Q9D379   |
| 62.515 | 0          | 26.425 | 593900000   | 23  | P34914   |
| 60.211 | 0.0016181  | 2.4916 | 113680000   | 14  | Q80VP1   |
| 62.253 | 0          | 4.1722 | 163260000   | 4   | Q8CHU3-2 |
| 68.24  | 0.0020056  | 2.373  | 175080000   | 12  | Q91W69   |
| 723.3  | 0          | 6.3    | 158620000   | 9   | Q8R0W0   |
| 170.08 | 0          | 69.325 | 2182600000  | 116 | Q8CGC7   |
| 98.47  | 0          | 4.8461 | 95222000    | 12  | P42567   |
| 82.228 | 0.00081599 | 2.5739 | 61385000    | 3   | Q99K30   |
| 106.6  | 0          | 7.8899 | 202760000   | 17  | Q9EQH2   |
| 154.33 | 0.00082068 | 2.6617 | 20517000    | 7   | Q80TH2-1 |
| 32.562 | 0          | 20.676 | 808270000   | 15  | Q9DC16   |
| 12.259 | 0          | 20.757 | 621650000   | 31  | P84089   |
| 54.084 | 0          | 14.332 | 362200000   | 37  | Q8R180   |
| 28.823 | 0          | 8.7953 | 631490000   | 31  | P57759   |
| 46.852 | 0          | 29.727 | 1369200000  | 47  | Q9D1Q6   |
| 31.319 | 0          | 129.71 | 7202800000  | 155 | Q9R0P3   |
| 121.55 | 0          | 236.98 | 10772000000 | 333 | Q3U7R1   |
| 94.138 | 0          | 120.19 | 2751600000  | 95  | Q3TZZ7   |
| 49.03  | 0          | 3.7753 | 291280000   | 5   | Q8BWY3   |
| 35.009 | 0          | 240.11 | 26576000000 | 290 | Q99LC5   |
| 27.623 | 0          | 183.48 | 8324700000  | 149 | Q9DCW4   |
| 68.09  | 0          | 74.429 | 2483800000  | 78  | Q921G7   |

|        |            |        |             |      |          |
|--------|------------|--------|-------------|------|----------|
| 27.738 | 0          | 52.611 | 1279300000  | 53   | Q9DCM0   |
| 103.96 | 0.003882   | 1.9335 | 37140000    | 6    | Q9D4H1   |
| 94.128 | 0          | 12.522 | 256660000   | 11   | A6H5Z3   |
| 83.206 | 0          | 48.334 | 2687600000  | 114  | Q8BH61   |
| 70.268 | 0          | 17.618 | 1221000000  | 39   | P19221   |
| 14.819 | 0          | 11.571 | 821000000   | 28   | P11404   |
| 14.65  | 0          | 123.85 | 7878700000  | 114  | P04117   |
| 52.471 | 0          | 12.488 | 188770000   | 17   | Q3TDN2   |
| 46.175 | 0          | 36.602 | 1812100000  | 56   | P35505   |
| 61.012 | 0          | 40.142 | 470660000   | 28   | Q9D281   |
| 121.64 | 0          | 13.601 | 141220000   | 9    | Q6A0A9   |
| 102.65 | 0          | 207.43 | 5168200000  | 214  | Q3UW53   |
| 84.818 | 0          | 71.61  | 653500000   | 42   | Q8R1F1   |
| 17.725 | 0          | 5.4276 | 474510000   | 34   | Q9D6U8   |
| 46.942 | 0.0004344  | 3.2982 | 77331000    | 7    | Q3TCJ1   |
| 24.394 | 0          | 5.1809 | 203010000   | 17   | Q9CYH2   |
| 24.752 | 0          | 12.131 | 174080000   | 20   | Q91VU0   |
| 39.593 | 0.0063886  | 1.5896 | 1975400000  | 18   | Q9WTJ8   |
| 55.055 | 0          | 33.535 | 136360000   | 9    | Q3TJZ6   |
| 45.349 | 0          | 3.6279 | 110990000   | 6    | Q80VD1   |
| 57.598 | 0          | 27.651 | 782690000   | 44   | Q8C0C7   |
| 65.696 | 0          | 14.323 | 728540000   | 49   | Q9WUA2   |
| 272.43 | 0          | 323.31 | 46198000000 | 808  | P19096   |
| 6.6478 | 0          | 4.8061 | 1198000000  | 17   | P62862   |
| 34.306 | 0          | 17.368 | 779990000   | 30   | P35550   |
| 41.026 | 0          | 244.12 | 38703000000 | 553  | Q71FD7   |
| 78.032 | 0          | 14.852 | 308980000   | 19   | Q08879   |
| 75.283 | 0          | 5.5982 | 270510000   | 7    | Q08879-2 |
| 126.5  | 0          | 73.299 | 3419400000  | 133  | P37889-2 |
| 50.193 | 0          | 323.31 | 1.6749E+11  | 875  | Q9WVH9   |
| 312.3  | 0          | 323.31 | 2.3922E+11  | 2583 | Q61554   |
| 313.82 | 0          | 36.564 | 485300000   | 10   | Q61555   |
| 33.676 | 0.00043821 | 3.4085 | 106710000   | 12   | Q80UW2   |
| 82.687 | 0          | 23.681 | 199530000   | 14   | Q8BJL1   |
| 34.492 | 0          | 3.6207 | 50779000    | 6    | Q9QZN4   |
| 40.092 | 0.0098289  | 1.3338 | 128910000   | 6    | Q61559   |
| 88.733 | 0          | 8.2892 | 110150000   | 5    | Q3UQN2   |
| 40.581 | 0          | 9.9006 | 118570000   | 13   | Q920E5   |
| 47.13  | 0          | 7.5726 | 400600000   | 4    | P22315   |
| 77.8   | 0          | 323.31 | 18877000000 | 425  | Q8CIB5   |
| 75.634 | 0          | 30.153 | 401020000   | 8    | Q8K1B8   |



|        |            |        |             |      |           |
|--------|------------|--------|-------------|------|-----------|
| 42.712 | 0          | 3.6232 | 100020000   | 2    | Q9QXC1    |
| 61.325 | 0          | 323.31 | 19138000000 | 319  | E9PV24-2  |
| 54.752 | 0          | 323.31 | 33474000000 | 464  | Q8K0E8    |
| 17.417 | 0          | 5.4781 | 192550000   | 19   | P61148    |
| 49.391 | 0          | 323.31 | 38879000000 | 437  | Q8VCM7    |
| 48.95  | 0          | 5.2515 | 42284000    | 1    | P12804    |
| 50.052 | 0          | 207.19 | 10889000000 | 255  | P97807-2  |
| 31.888 | 0          | 288.52 | 29411000000 | 425  | P97447    |
| 31.794 | 0          | 33.973 | 651950000   | 43   | Q9R059    |
| 101.85 | 0          | 63.39  | 1384100000  | 54   | Q6P6L0-3  |
| 17.008 | 0          | 124.66 | 2420300000  | 62   | Q9CQ92    |
| 64.697 | 0          | 7.462  | 352200000   | 27   | Q61576    |
| 11.922 | 0          | 57     | 1903700000  | 51   | P26883    |
| 15.344 | 0          | 4.2006 | 318990000   | 10   | P45878    |
| 25.147 | 0          | 5.8925 | 116730000   | 4    | Q62446    |
| 51.572 | 0          | 14.072 | 683570000   | 15   | P30416    |
| 62.995 | 0          | 11.744 | 479330000   | 18   | Q9Z247    |
| 144.8  | 0          | 94.22  | 3408100000  | 112  | Q9JJ28    |
| 281.22 | 0          | 323.31 | 9.9382E+11  | 5399 | Q8BTM8    |
| 277.82 | 0          | 259.32 | 5437000000  | 214  | Q80X90    |
| 291.12 | 0          | 323.31 | 13526000000 | 423  | Q8VHX6    |
| 47.513 | 0          | 33.227 | 901760000   | 45   | O08917    |
| 41.658 | 0          | 29.172 | 1248100000  | 59   | Q60634-3  |
| 111.28 | 0          | 10.292 | 123440000   | 5    | Q6ZPF4-2  |
| 59.914 | 0          | 51.494 | 2872300000  | 69   | P50285    |
| 60.974 | 0          | 296.97 | 32521000000 | 443  | Q8K2I3    |
| 60.515 | 0          | 33.319 | 700870000   | 27   | P97501    |
| 43.054 | 0          | 143.18 | 3711800000  | 97   | P50608    |
| 47.18  | 0          | 4.2865 | 83026000    | 11   | P35922-11 |
| 272.53 | 0          | 323.31 | 1.5461E+11  | 1617 | P11276    |
| 44.013 | 0          | 13.115 | 254450000   | 7    | Q61239    |
| 84.573 | 0.0060514  | 1.6473 | 104010000   | 7    | O35409    |
| 339.09 | 0.006056   | 1.6612 | 1527700000  | 4    | E9Q8I9    |
| 34.554 | 0          | 18.581 | 315270000   | 25   | Q62356    |
| 21.066 | 0          | 35.711 | 2532400000  | 88   | P09528    |
| 20.802 | 0          | 54.342 | 3647100000  | 82   | P29391    |
| 16.564 | 0.00042337 | 3.0009 | 134850000   | 9    | Q9D6K8    |
| 13.72  | 0          | 8.9437 | 286690000   | 18   | Q8R2K1-5  |
| 52.673 | 0          | 15.763 | 520020000   | 23   | P56959    |
| 60.815 | 0          | 19.351 | 317680000   | 16   | Q61584-2  |
| 51.828 | 0          | 26.303 | 1036500000  | 57   | P97855    |

|        |            |        |             |     |          |
|--------|------------|--------|-------------|-----|----------|
| 50.784 | 0          | 4.9123 | 216640000   | 16  | P97379-2 |
| 59.262 | 0          | 92.82  | 2082800000  | 90  | Q00612   |
| 106.25 | 0          | 6.5392 | 130610000   | 12  | P70699   |
| 13.918 | 0.0049751  | 1.7295 | 30611000    | 1   | Q9DCD6   |
| 138.34 | 0          | 26.992 | 74765000    | 10  | Q99KY4-2 |
| 42.295 | 0          | 44.478 | 1408500000  | 28  | Q9R0N0   |
| 37.798 | 0          | 10.923 | 116910000   | 15  | Q8K157   |
| 26.336 | 0          | 8.1545 | 275830000   | 17  | O35969   |
| 106.91 | 0          | 152.82 | 5591500000  | 156 | Q8BHN3   |
| 35.81  | 0          | 323.31 | 1.414E+11   | 978 | P16858   |
| 81.877 | 0.00042937 | 3.1672 | 211590000   | 2   | Q9CZD3   |
| 107.5  | 0          | 18.874 | 528190000   | 20  | Q64737   |
| 32.932 | 0          | 39.603 | 563520000   | 27  | O55126   |
| 80.363 | 0          | 11.818 | 321140000   | 17  | Q9D6Y9   |
| 66.739 | 0          | 33.077 | 497700000   | 31  | Q9Z0E6   |
| 53.6   | 0          | 160.91 | 6132600000  | 147 | P21614   |
| 44.93  | 0          | 6.4351 | 86551000    | 12  | O88986   |
| 48.605 | 0          | 4.5379 | 160980000   | 8   | Q60759   |
| 293.02 | 0          | 38.1   | 549530000   | 35  | E9PVA8   |
| 51.012 | 0          | 10.903 | 155340000   | 16  | Q9R111   |
| 50.521 | 0          | 106.12 | 4575800000  | 157 | P50396   |
| 50.537 | 0          | 313.78 | 16988000000 | 334 | Q61598   |
| 87.194 | 0          | 6.9336 | 55113000    | 2   | Q9QYC7   |
| 26.778 | 0          | 9.427  | 156470000   | 1   | Q9D7M1   |
| 24.554 | 0          | 6.8303 | 57798000    | 3   | Q99JY3   |
| 85.299 | 0          | 5.8461 | 235370000   | 16  | Q68FF6   |
| 78.765 | 0          | 5.8592 | 251260000   | 7   | Q9JLQ2   |
| 133.73 | 0          | 36.054 | 1299300000  | 61  | Q61543   |
| 20.809 | 0          | 39.745 | 5555000000  | 131 | Q9CPU0   |
| 32.409 | 0          | 20.701 | 1242000000  | 40  | Q9CPV4-2 |
| 11.871 | 0          | 12.446 | 1177200000  | 44  | Q9QUH0   |
| 37.778 | 0          | 41.59  | 886080000   | 39  | Q9CQM9   |
| 65.994 | 0          | 36.317 | 1059900000  | 35  | D3Z7P3-2 |
| 23.689 | 0          | 13.07  | 312150000   | 11  | Q9JL62   |
| 61.336 | 0          | 226.02 | 11416000000 | 321 | P26443   |
| 42.119 | 0          | 77.76  | 1006000000  | 29  | P15105   |
| 59.715 | 0          | 16.165 | 284200000   | 12  | Q922P9   |
| 16.723 | 0          | 8.828  | 260180000   | 8   | Q9CQI3   |
| 46.244 | 0          | 5.8217 | 256160000   | 21  | Q922H4   |
| 39.916 | 0          | 15.426 | 560270000   | 29  | Q8BTZ7   |
| 76.723 | 0.0038775  | 1.9023 | 158010000   | 4   | Q3THK7   |

|        |           |        |             |     |          |
|--------|-----------|--------|-------------|-----|----------|
| 42.024 | 0         | 30.181 | 1592200000  | 70  | P21278   |
| 44.054 | 0         | 7.4714 | 207070000   | 12  | P27601   |
| 40.361 | 0         | 6.7526 | 228120000   | 12  | B2RSH2   |
| 40.489 | 0         | 166.12 | 6186700000  | 194 | P08752   |
| 40.084 | 0         | 8.5384 | 80267000    | 9   | P18872   |
| 40.036 | 0         | 33.117 | 879390000   | 35  | P18872-2 |
| 42.158 | 0         | 51.492 | 1647800000  | 115 | P21279   |
| 44.265 | 0         | 18.722 | 1730400000  | 64  | P63094-2 |
| 37.377 | 0         | 109.36 | 1756200000  | 59  | P62874   |
| 37.331 | 0         | 145.82 | 4418500000  | 134 | P62880   |
| 35.076 | 0         | 89.344 | 3459000000  | 107 | P68040   |
| 37.379 | 0         | 12.655 | 206800000   | 9   | P29387   |
| 7.9972 | 0         | 17.702 | 801380000   | 17  | Q9DAS9   |
| 7.3184 | 0         | 11.636 | 714590000   | 15  | Q80SZ7   |
| 30.913 | 0         | 4.5619 | 118320000   | 5   | Q9CRC9-2 |
| 20.791 | 0.000818  | 2.602  | 87819000    | 12  | Q9JK38   |
| 110.05 | 0         | 3.9887 | 77137000    | 8   | Q921M4-2 |
| 39.661 | 0         | 26.043 | 319800000   | 16  | Q99JX3-2 |
| 24.725 | 0         | 10.918 | 54861000    | 7   | O35166   |
| 46.247 | 0         | 45.344 | 497970000   | 19  | P05201   |
| 47.411 | 0         | 226.26 | 12748000000 | 273 | P05202   |
| 63.467 | 0         | 62.789 | 192690000   | 11  | O08742   |
| 62.586 | 0         | 6.2954 | 161760000   | 6   | P51655   |
| 63.056 | 0         | 106.46 | 2220900000  | 93  | Q9R087   |
| 37.572 | 0         | 212.85 | 6910700000  | 160 | P13707   |
| 34.634 | 0         | 35.446 | 2369100000  | 39  | Q3ULJ0-2 |
| 80.953 | 0         | 198.43 | 9884800000  | 264 | Q64521   |
| 62.766 | 0         | 323.31 | 38713000000 | 659 | P06745   |
| 63.675 | 0.0094787 | 1.3574 | 42810000    | 1   | Q99P91   |
| 53.442 | 0         | 8.2902 | 123310000   | 10  | Q99LD4   |
| 22.329 | 0         | 111.11 | 9034200000  | 208 | P11352   |
| 25.424 | 0         | 41.832 | 11566000000 | 148 | P46412   |
| 19.522 | 0         | 3.7634 | 328910000   | 7   | O70325-2 |
| 21.061 | 0         | 3.8972 | 244400000   | 9   | Q99LJ6   |
| 25.238 | 0         | 11.809 | 480050000   | 34  | Q60631   |
| 35.328 | 0         | 107.15 | 4078400000  | 94  | Q91Z53   |
| 63.458 | 0         | 20.423 | 891020000   | 49  | P28798   |
| 24.307 | 0         | 7.2867 | 127640000   | 13  | Q99LP6   |
| 51.66  | 0         | 4.9264 | 100980000   | 1   | Q2NL51   |
| 46.71  | 0         | 8.0968 | 207250000   | 16  | Q9WV60   |
| 85.941 | 0         | 323.31 | 33662000000 | 378 | P13020   |

|        |            |        |             |      |          |
|--------|------------|--------|-------------|------|----------|
| 80.762 | 0.00082576 | 2.7561 | 417970000   | 11   | P13020-2 |
| 51.073 | 0          | 24.785 | 1007700000  | 25   | P47791-2 |
| 52.246 | 0          | 8.9633 | 209520000   | 18   | P51855   |
| 25.36  | 0.0031596  | 2.1598 | 96788000    | 11   | P30115   |
| 25.704 | 0          | 31.433 | 1224300000  | 74   | Q9DCM2   |
| 25.97  | 0          | 265.2  | 96814000000 | 559  | P10649   |
| 25.716 | 0          | 93.383 | 17334000000 | 202  | P15626   |
| 26.635 | 0          | 11.54  | 438180000   | 32   | P48774   |
| 25.709 | 0          | 5.9021 | 298300000   | 27   | Q80W21   |
| 27.497 | 0          | 25.998 | 387250000   | 35   | O09131   |
| 23.609 | 0          | 323.31 | 47664000000 | 251  | P19157   |
| 27.374 | 0          | 94.909 | 4490900000  | 161  | Q64471   |
| 27.634 | 0          | 7.2704 | 334830000   | 12   | Q61133   |
| 27.403 | 0          | 43.989 | 1832100000  | 75   | Q99L20   |
| 24.275 | 0          | 50.524 | 746150000   | 52   | Q9WVLO   |
| 106.05 | 0          | 12.933 | 182900000   | 2    | Q9ESZ8-5 |
| 77.587 | 0          | 82.066 | 4457300000  | 183  | Q9ERL9   |
| 70.597 | 0          | 65.366 | 1628600000  | 95   | O54865   |
| 34.47  | 0          | 26.89  | 442590000   | 21   | Q8K2A1   |
| 37.402 | 0          | 24.597 | 413790000   | 22   | Q9R062   |
| 83.926 | 0          | 3.8567 | 111290000   | 1    | Q9Z1E4   |
| 20.861 | 0          | 23.31  | 10305000000 | 93   | P10922   |
| 28.093 | 0.00042845 | 3.1591 | 18642000    | 2    | P14434   |
| 40.836 | 0          | 22.396 | 1014300000  | 31   | P01899   |
| 41.301 | 0          | 6.9868 | 146560000   | 11   | P01901   |
| 37.251 | 0          | 7.8413 | 291620000   | 13   | P01898   |
| 13.509 | 0          | 82.267 | 5612700000  | 83   | Q3THW5   |
| 39.289 | 0          | 133.5  | 8727900000  | 211  | Q9QZQ8-2 |
| 40.092 | 0          | 6.2688 | 583290000   | 12   | Q8CCK0   |
| 15.328 | 0          | 105.45 | 96672000000 | 35   | P84244   |
| 88.927 | 0          | 11.14  | 380030000   | 9    | Q8CFX1   |
| 34.463 | 0          | 302.99 | 19682000000 | 225  | Q61425   |
| 82.669 | 0          | 323.31 | 48147000000 | 763  | Q8BMS1   |
| 51.386 | 0          | 305.17 | 23328000000 | 409  | Q99JY0   |
| 28.901 | 0          | 5.5203 | 199290000   | 6    | Q99KB8-2 |
| 9.352  | 0.00043422 | 3.2974 | 236390000   | 19   | Q9EQ21   |
| 40.477 | 0          | 24.497 | 1015800000  | 33   | Q9QUP5   |
| 57.432 | 0          | 5.0734 | 522820000   | 16   | Q61035   |
| 31.654 | 0          | 8.9603 | 57921000    | 1    | O35387   |
| 15.085 | 0          | 270.52 | 4.526E+11   | 668  | P01942   |
| 15.84  | 0          | 323.31 | 5.5827E+11  | 1367 | P02088   |

|        |            |        |             |     |          |
|--------|------------|--------|-------------|-----|----------|
| 15.878 | 0          | 36.843 | 1140800000  | 19  | P02089   |
| 16.494 | 0.0031571  | 2.1513 | 146040000   | 8   | P04444   |
| 210.43 | 0          | 28.615 | 348220000   | 10  | Q61191   |
| 55.302 | 0.0004386  | 3.4115 | 219770000   | 5   | P70288   |
| 26.268 | 0          | 9.4911 | 474020000   | 17  | P51859   |
| 22.43  | 0          | 35.251 | 960890000   | 31  | Q9JMG7   |
| 28.73  | 0          | 19.584 | 710560000   | 27  | Q3UGR5   |
| 141.74 | 0          | 31.59  | 1002300000  | 62  | Q8VDJ3   |
| 290.08 | 0          | 4.7852 | 40712000    | 6   | Q69ZR2   |
| 60.612 | 0          | 10.331 | 181760000   | 19  | P29416   |
| 61.115 | 0.0035006  | 1.9446 | 47237000    | 2   | P20060   |
| 86.014 | 0          | 4.4582 | 62634000    | 2   | Q99LI8   |
| 35.44  | 0          | 156.75 | 3338600000  | 137 | Q99L13   |
| 43.037 | 0          | 51.357 | 1546300000  | 88  | Q8QZS1   |
| 10.425 | 0          | 13.3   | 121430000   | 2   | Q9JLR9   |
| 13.777 | 0          | 97.196 | 6332300000  | 115 | P70349   |
| 17.32  | 0          | 10.869 | 763670000   | 27  | Q9D0S9   |
| 115.2  | 0          | 46.819 | 944900000   | 46  | Q8VD75   |
| 21.785 | 0          | 9.9724 | 551540000   | 15  | P43275   |
| 22.576 | 0          | 7.609  | 1140300000  | 48  | P43276   |
| 21.266 | 0          | 54.657 | 16895000000 | 223 | P15864   |
| 22.099 | 0          | 5.2574 | 223300000   | 9   | P43277   |
| 21.977 | 0          | 17.024 | 10937000000 | 80  | P43274   |
| 14.135 | 0          | 41.369 | 821440000   | 44  | COHKE9   |
| 13.992 | 0          | 81.232 | 1.7456E+11  | 567 | Q8CGP2   |
| 15.404 | 0          | 72.944 | 25703000000 | 52  | P68433   |
| 15.388 | 0          | 131.15 | 1.1843E+11  | 204 | P84228   |
| 11.367 | 0          | 248.99 | 1.4573E+11  | 471 | P62806   |
| 14.013 | 0.0023981  | 2.3097 | 334230000   | 15  | Q64522   |
| 13.988 | 0          | 240.18 | 1.8844E+11  | 452 | Q64523   |
| 102.3  | 0          | 173.32 | 6911800000  | 219 | P17710-3 |
| 102.53 | 0          | 102.55 | 1684800000  | 44  | O08528   |
| 37.78  | 0          | 10.3   | 143670000   | 5   | P22907-2 |
| 24.893 | 0          | 96.77  | 14384000000 | 152 | P63158   |
| 24.162 | 0.00042753 | 3.1424 | 333090000   | 4   | P30681   |
| 34.238 | 0          | 21.358 | 329590000   | 28  | P38060   |
| 56.822 | 0          | 7.2962 | 327110000   | 16  | P54869   |
| 9.4226 | 0.00122    | 2.541  | 138190000   | 9   | P09602   |
| 45.343 | 0          | 3.9694 | 240450000   | 8   | Q9JL35   |
| 35.738 | 0          | 11.538 | 186520000   | 2   | O70252   |
| 30.53  | 0          | 3.8985 | 84518000    | 4   | Q9CX86   |

|        |            |        |             |     |          |
|--------|------------|--------|-------------|-----|----------|
| 34.196 | 0          | 38.169 | 785790000   | 34  | P49312   |
| 32.46  | 0          | 195.92 | 6186500000  | 162 | O88569-3 |
| 37.086 | 0          | 119.2  | 7079900000  | 152 | Q8BG05-2 |
| 30.831 | 0          | 21.111 | 2322800000  | 82  | Q99020   |
| 32.223 | 0          | 10.328 | 709490000   | 29  | Q9Z204-4 |
| 30.777 | 0          | 31.905 | 3519600000  | 108 | Q60668-4 |
| 33.558 | 0.00043687 | 3.3584 | 240580000   | 10  | Q9Z130   |
| 45.729 | 0          | 39.626 | 1082400000  | 41  | Q9Z2X1   |
| 49.199 | 0          | 156.35 | 2636800000  | 83  | O35737   |
| 49.279 | 0          | 17.85  | 410020000   | 17  | P70333   |
| 50.976 | 0          | 202.04 | 12238000000 | 208 | P61979   |
| 63.963 | 0          | 113.23 | 4188400000  | 107 | Q8R081   |
| 64.124 | 0          | 5.1972 | 205050000   | 12  | Q921F4   |
| 73.74  | 0          | 58.987 | 3827700000  | 107 | Q9D0E1-2 |
| 87.917 | 0          | 210.4  | 10848000000 | 191 | Q8VEK3   |
| 85.045 | 0          | 6.3159 | 524300000   | 7   | Q8VDM6-2 |
| 84.939 | 0          | 31.299 | 852850000   | 36  | Q00PI9   |
| 83.217 | 0          | 15.97  | 122830000   | 14  | Q8BUK6   |
| 31.363 | 0.006391   | 1.5938 | 35775000    | 1   | P23463   |
| 38.752 | 0          | 8.0057 | 33606000    | 3   | Q61646   |
| 59.548 | 0          | 79.734 | 5989200000  | 134 | Q3TEA8-2 |
| 22.338 | 0          | 5.8957 | 283480000   | 21  | P62748   |
| 24.57  | 0          | 7.3663 | 414640000   | 42  | P00493   |
| 51.317 | 0          | 87.556 | 5183700000  | 164 | Q91X72   |
| 59.162 | 0          | 23.157 | 728570000   | 40  | Q9ESB3   |
| 8.6107 | 0          | 32.211 | 224760000   | 5   | Q9CQZ1   |
| 32.364 | 0          | 3.7566 | 92429000    | 10  | P50172   |
| 27.418 | 0          | 110.15 | 7599000000  | 133 | O08756   |
| 32.88  | 0          | 40.457 | 1158300000  | 74  | Q9EQ06   |
| 34.741 | 0          | 20.761 | 1482100000  | 59  | O70503   |
| 79.481 | 0          | 8.3432 | 175730000   | 6   | P51660   |
| 54.208 | 0          | 24.114 | 311710000   | 15  | Q2TPA8   |
| 84.787 | 0          | 269.02 | 7963600000  | 260 | P07901   |
| 83.28  | 0          | 323.31 | 26927000000 | 551 | P11499   |
| 92.475 | 0          | 323.31 | 18264000000 | 431 | P08113   |
| 74.87  | 0          | 12.396 | 400420000   | 23  | Q8K0U4   |
| 76.118 | 0          | 56.173 | 1312600000  | 83  | Q9CZJ2   |
| 70.078 | 0          | 205.47 | 14381000000 | 354 | Q61696   |
| 70.175 | 0          | 7.6628 | 628000000   | 15  | P17879   |
| 69.641 | 0          | 78.173 | 3461300000  | 104 | P17156   |
| 94.132 | 0          | 163.73 | 5519400000  | 169 | Q61316   |

|        |            |        |             |      |          |
|--------|------------|--------|-------------|------|----------|
| 92.251 | 0          | 6.3583 | 406440000   | 13   | P48722-2 |
| 72.421 | 0          | 279.25 | 21077000000 | 398  | P20029   |
| 70.87  | 0          | 323.31 | 63657000000 | 715  | P63017   |
| 73.46  | 0          | 141.51 | 6537500000  | 218  | P38647   |
| 23.014 | 0          | 323.31 | 30193000000 | 353  | P14602   |
| 17.521 | 0          | 95.623 | 2125300000  | 50   | Q5EBG6   |
| 18.634 | 0          | 44.725 | 1064500000  | 39   | P35385   |
| 21.533 | 0          | 12.954 | 573100000   | 29   | Q9JK92   |
| 60.955 | 0          | 318.46 | 26059000000 | 379  | P63038   |
| 10.963 | 0          | 30.69  | 6147200000  | 79   | Q64433   |
| 398.29 | 0          | 323.31 | 3.5945E+11  | 3906 | Q05793   |
| 91.696 | 0          | 95.256 | 1039500000  | 58   | Q61699-2 |
| 51.213 | 0          | 60.959 | 6885800000  | 108  | Q9R118   |
| 480.89 | 0          | 27.362 | 381600000   | 29   | Q7TMY8-3 |
| 111.18 | 0          | 53.036 | 2329300000  | 106  | Q9JKR6   |
| 27.974 | 0.00042517 | 3.0648 | 129630000   | 15   | Q9DB29   |
| 144.27 | 0.0008261  | 2.7579 | 105250000   | 17   | Q8BU30   |
| 112.8  | 0          | 73.8   | 2267800000  | 88   | Q8BIJ6   |
| 76.765 | 0          | 12.988 | 305450000   | 11   | Q9DBD0   |
| 58.752 | 0          | 4.2861 | 75292000    | 3    | P13597-2 |
| 31.39  | 0.000429   | 3.1641 | 103540000   | 15   | P35330   |
| 117.77 | 0          | 20.483 | 179450000   | 7    | Q9JHR7   |
| 46.674 | 0          | 81.964 | 4297700000  | 133  | O88844   |
| 50.906 | 0          | 142.62 | 17063000000 | 315  | P54071   |
| 39.638 | 0          | 192.45 | 21477000000 | 224  | Q9D6R2   |
| 42.785 | 0          | 99.818 | 3796500000  | 100  | P70404   |
| 31.875 | 0          | 7.4922 | 135610000   | 14   | Q9D8C4   |
| 38.97  | 0          | 3.9435 | 96861000    | 13   | Q61249   |
| 66.959 | 0.0046065  | 1.762  | 47525000    | 4    | P70389   |
| 25.346 | 0          | 30.495 | 273210000   | 14   | P47880   |
| 28.969 | 0          | 112.28 | 10965000000 | 190  | Q61581   |
| 36.587 | 0          | 21.502 | 1088900000  | 44   | P01867-2 |
| 35.704 | 0.0027767  | 2.2296 | 89933000    | 8    | P01868   |
| 49.971 | 0          | 89.586 | 4781100000  | 133  | P01872   |
| 11.934 | 0          | 33.362 | 1639100000  | 132  | P01837   |
| 42.532 | 0          | 31.383 | 181080000   | 6    | Q9DBZ1   |
| 38.476 | 0          | 6.0116 | 95696000    | 3    | Q9DBZ1-2 |
| 86.689 | 0          | 7.6181 | 97024000    | 5    | O88351   |
| 43.062 | 0          | 11.292 | 472900000   | 19   | Q9CXY6   |
| 78.092 | 0.0023895  | 2.27   | 214720000   | 7    | Q9Z1X4-2 |
| 51.373 | 0          | 205.7  | 20518000000 | 318  | O55222   |

|        |            |        |             |     |          |
|--------|------------|--------|-------------|-----|----------|
| 42.812 | 0          | 5.7421 | 85970000    | 4   | Q8BU33-3 |
| 78.727 | 0          | 133.99 | 6812000000  | 192 | Q8CAQ8-3 |
| 30.436 | 0          | 15.015 | 1011500000  | 52  | O55023   |
| 137.49 | 0          | 23.883 | 320710000   | 16  | Q0GNC1-3 |
| 29.459 | 0          | 95.219 | 1742900000  | 37  | P40936   |
| 43.346 | 0          | 22.877 | 612550000   | 35  | P49442   |
| 105.54 | 0          | 9.3355 | 399420000   | 9   | Q9EPW0   |
| 117.94 | 0          | 4.909  | 35146000    | 2   | Q7TPD0   |
| 119.27 | 0          | 7.4106 | 82482000    | 10  | Q8VI75   |
| 123.59 | 0          | 171.97 | 1753400000  | 94  | Q8BKC5   |
| 119.49 | 0          | 31.059 | 743160000   | 54  | Q9EPL8   |
| 116.05 | 0          | 9.7135 | 124060000   | 5   | Q91YE6   |
| 188.74 | 0          | 323.31 | 15468000000 | 428 | Q9JKF1   |
| 80.564 | 0.0035239  | 2.04   | 3664100000  | 3   | Q8K3X4   |
| 17.897 | 0          | 5.4986 | 104330000   | 3   | Q64339   |
| 45.614 | 0          | 16.086 | 4954100000  | 54  | Q6GU68   |
| 32.032 | 0.0064006  | 1.6064 | 69863000    | 4   | Q91V64   |
| 22.417 | 0          | 179.91 | 3928300000  | 132 | P85094   |
| 60.931 | 0          | 17.779 | 332270000   | 19  | Q9JHU9   |
| 98.992 | 0.0035419  | 2.0858 | 21225000    | 3   | Q8C863   |
| 130.81 | 0          | 16.981 | 498940000   | 26  | Q3V3R4   |
| 112.68 | 0          | 93.602 | 925710000   | 33  | Q9QUM0   |
| 116.74 | 0          | 47.077 | 1987900000  | 71  | Q62470   |
| 115.04 | 0          | 38.095 | 1676100000  | 81  | P11688   |
| 119.6  | 0          | 10.71  | 86160000    | 6   | Q61739-2 |
| 117.55 | 0          | 323.31 | 34651000000 | 539 | A2ARA8   |
| 114.41 | 0          | 48.918 | 1523100000  | 29  | B8JK39   |
| 115.36 | 0          | 103.92 | 5425400000  | 126 | P43406   |
| 88.231 | 0          | 323.31 | 50735000000 | 565 | P09055   |
| 86.738 | 0          | 18.829 | 1304400000  | 51  | O54890   |
| 87.908 | 0          | 58.687 | 2146200000  | 58  | O70309   |
| 86.041 | 0.0087719  | 1.3834 | 3060200000  | 16  | Q9Z0T9   |
| 101.07 | 0          | 79.156 | 2774000000  | 84  | Q61702   |
| 105.93 | 0          | 21.2   | 623480000   | 25  | Q61703   |
| 104.66 | 0          | 43.381 | 808270000   | 58  | A6X935   |
| 30.26  | 0.00042105 | 2.9386 | 66975000    | 14  | O89051   |
| 21.897 | 0          | 40.392 | 712390000   | 26  | Q9D892   |
| 306.86 | 0          | 113.14 | 2755800000  | 137 | P11881-8 |
| 304.27 | 0          | 5.0325 | 238790000   | 11  | P70227   |
| 46.325 | 0          | 162.75 | 3156700000  | 66  | Q9JHI5   |
| 133.37 | 0          | 13.917 | 240180000   | 16  | P52332   |



|        |            |        |            |     |          |
|--------|------------|--------|------------|-----|----------|
| 74.691 | 0          | 30.964 | 535880000  | 20  | Q9ET78   |
| 81.8   | 0          | 23.87  | 154900000  | 9   | Q02257   |
| 90.244 | 0          | 114.92 | 4275500000 | 174 | Q8BX02   |
| 67.839 | 0          | 27.857 | 555820000  | 39  | Q99MN1   |
| 46.13  | 0.00043898 | 3.4168 | 690390000  | 23  | Q9D3R6-3 |
| 32.136 | 0          | 23.277 | 226800000  | 14  | Q80UY2-2 |
| 7.5938 | 0.0087944  | 1.3966 | 2727200000 | 18  | O88454-2 |
| 57.685 | 0          | 24.384 | 909840000  | 50  | G5E897   |
| 81.182 | 0.0098253  | 1.3338 | 48515000   | 2   | Q8CIG3-2 |
| 35.955 | 0          | 4.7466 | 139010000  | 9   | Q6GV12   |
| 48.37  | 0          | 14.235 | 409290000  | 19  | Q60749   |
| 76.775 | 0          | 39.626 | 1017400000 | 47  | Q3U0V1   |
| 134.11 | 0          | 4.6951 | 157340000  | 6   | Q8C2E7   |
| 195.81 | 0          | 11.664 | 204430000  | 30  | Q9EQW7   |
| 80.169 | 0          | 11.931 | 93452000   | 1   | P28741   |
| 117.02 | 0.0053558  | 1.7276 | 611600000  | 23  | P33175   |
| 109.55 | 0          | 54.287 | 967760000  | 87  | Q61768   |
| 61.449 | 0          | 32.288 | 400010000  | 30  | O88447   |
| 28.742 | 0          | 30.688 | 292270000  | 8   | Q9JM71   |
| 429.36 | 0.0034992  | 1.9438 | 266780000  | 8   | P55200-2 |
| 47.898 | 0          | 98.386 | 2325600000 | 49  | O08677-2 |
| 57.922 | 0          | 54.265 | 1060600000 | 52  | O35343   |
| 59.964 | 0          | 31.681 | 702830000  | 38  | O35345   |
| 97.183 | 0          | 268.63 | 8090300000 | 252 | P70168   |
| 21.482 | 0          | 14.658 | 484180000  | 30  | P32883-2 |
| 46.137 | 0          | 24.126 | 174230000  | 7   | Q8K0Y2   |
| 52.862 | 0          | 323.31 | 5664200000 | 129 | Q9ERE2   |
| 54.628 | 0          | 36.336 | 271730000  | 13  | Q6IMF0   |
| 55.759 | 0          | 4.6707 | 53409000   | 4   | Q9Z2T6   |
| 17.919 | 0          | 20.464 | 439010000  | 9   | O08640   |
| 16.241 | 0          | 49.27  | 231480000  | 10  | Q9QZU5   |
| 8.8225 | 0          | 26.499 | 307090000  | 6   | Q925H6   |
| 6.6882 | 0          | 36.816 | 197040000  | 7   | O08632   |
| 10.271 | 0          | 5.967  | 82138000   | 6   | A2A591   |
| 9.5155 | 0          | 69.41  | 5016700000 | 37  | Q9D3I6   |
| 6.6973 | 0.0016214  | 2.5149 | 231480000  | 13  | O08633   |
| 143.2  | 0          | 7.1972 | 111420000  | 1   | Q61595-6 |
| 37.804 | 0          | 4.4849 | 23249000   | 2   | Q9CXA2   |
| 32.754 | 0          | 3.5773 | 173110000  | 9   | Q99KR3   |
| 343.81 | 0          | 93.16  | 1383300000 | 93  | Q60675   |
| 201.82 | 0          | 290.61 | 9407500000 | 232 | P97927   |

|        |            |        |            |     |          |
|--------|------------|--------|------------|-----|----------|
| 404.05 | 0          | 323.31 | 2644800000 | 584 | Q61001   |
| 197.09 | 0          | 12.089 | 804000000  | 21  | P02469   |
| 196.58 | 0          | 323.31 | 4950900000 | 996 | Q61292   |
| 177.3  | 0          | 323.31 | 2433400000 | 597 | P02468   |
| 43.865 | 0          | 8.4082 | 194190000  | 5   | P11438   |
| 45.655 | 0          | 6.7368 | 702770000  | 37  | P17047-3 |
| 17.749 | 0          | 8.5039 | 205800000  | 11  | Q9CQ22   |
| 9.6418 | 0          | 11.613 | 96251000   | 4   | Q9D1L9   |
| 50.777 | 0          | 14.356 | 235750000  | 4   | Q9JJK2   |
| 52.75  | 0          | 81.372 | 1229600000 | 53  | Q9CPY7-2 |
| 134.19 | 0.0053537  | 1.7276 | 52072000   | 9   | Q8BMJ2   |
| 29.994 | 0          | 25.606 | 664140000  | 40  | Q61792   |
| 70.148 | 0          | 28.923 | 583410000  | 27  | Q61233   |
| 70.75  | 0          | 156.04 | 7437800000 | 202 | Q9JKS4-3 |
| 36.498 | 0          | 237.49 | 1812400000 | 342 | P06151   |
| 36.572 | 0          | 183.59 | 5056900000 | 192 | P16125   |
| 37.225 | 0.00042553 | 3.08   | 378470000  | 12  | Q9Z1F6   |
| 57.506 | 0          | 28.954 | 548150000  | 34  | Q6DVA0   |
| 81.7   | 0          | 14.264 | 83425000   | 17  | Q8CG70   |
| 82.988 | 0          | 100.86 | 1893000000 | 58  | Q9Z2I0   |
| 31.627 | 0          | 48.487 | 561530000  | 25  | Q924L1-2 |
| 14.866 | 0          | 288.13 | 9470900000 | 343 | P16045   |
| 27.515 | 0          | 18.872 | 999750000  | 22  | P16110   |
| 64.49  | 0          | 3.6421 | 29704000   | 3   | Q07797   |
| 49.372 | 0          | 12.622 | 247830000  | 16  | O89017   |
| 81.286 | 0          | 3.6418 | 4344200000 | 2   | P42703-2 |
| 100.67 | 0          | 12.59  | 469380000  | 25  | Q3UH68-3 |
| 37.24  | 0          | 61.232 | 4535600000 | 152 | Q99JW4   |
| 39.031 | 0          | 48.526 | 2965600000 | 72  | Q91XD2   |
| 45.325 | 0          | 9.4756 | 124330000  | 6   | Q9Z0M5   |
| 83.347 | 0          | 77.319 | 1749000000 | 62  | P54310   |
| 57.788 | 0          | 42.814 | 1224000000 | 30  | Q9D0F3   |
| 40.429 | 0          | 9.4525 | 428040000  | 25  | Q9DBH5   |
| 40.996 | 0          | 231.47 | 1315500000 | 279 | Q8VEE1   |
| 79.996 | 0          | 5.0375 | 293510000  | 3   | Q8C3X8   |
| 74.237 | 0          | 323.31 | 6698900000 | 752 | P48678   |
| 66.785 | 0          | 223.44 | 5925000000 | 192 | P14733   |
| 67.317 | 0          | 39.149 | 1641000000 | 68  | P21619   |
| 66.309 | 0          | 85.106 | 9977100000 | 249 | Q8BVA4   |
| 117.3  | 0          | 16.938 | 755070000  | 49  | Q8C129   |
| 105.84 | 0          | 60.64  | 1283100000 | 77  | Q8CGK3   |

|        |            |        |             |     |          |
|--------|------------|--------|-------------|-----|----------|
| 46.7   | 0          | 108.32 | 6433000000  | 124 | P28301   |
| 66.506 | 0          | 277.22 | 30806000000 | 469 | P97873   |
| 83.739 | 0          | 5.299  | 234260000   | 8   | Q9Z175   |
| 53.109 | 0          | 3.5324 | 63271000    | 6   | P11152   |
| 65.89  | 0          | 323.31 | 78388000000 | 813 | Q8BFW7   |
| 504.74 | 0          | 156.85 | 7243400000  | 277 | Q91ZX7   |
| 42.215 | 0          | 12.293 | 685390000   | 24  | P55302   |
| 156.61 | 0          | 79.098 | 2149600000  | 82  | Q6PB66   |
| 51.851 | 0          | 91.709 | 7338200000  | 137 | Q9CXD9   |
| 39.06  | 0.0070475  | 1.4974 | 432270000   | 16  | Q8BGI7   |
| 68.075 | 0          | 10.999 | 803510000   | 9   | Q9CRC8   |
| 71.991 | 0.0027745  | 2.2276 | 273530000   | 7   | Q8C031   |
| 34.877 | 0          | 48.694 | 2381500000  | 88  | Q922Q8   |
| 71.302 | 0          | 46.213 | 1017800000  | 17  | Q3UZ39-2 |
| 11.845 | 0.005723   | 1.7164 | 112450000   | 10  | P62311   |
| 9.9374 | 0          | 3.4371 | 92892000    | 7   | P62322   |
| 11.636 | 0          | 30.182 | 418970000   | 10  | Q9CQQ8   |
| 69.05  | 0          | 148.78 | 4235400000  | 158 | P24527   |
| 153.18 | 0          | 141.67 | 10944000000 | 228 | Q8CG19-2 |
| 195.83 | 0.00043478 | 3.3138 | 282010000   | 4   | O08999   |
| 134.36 | 0          | 8.2802 | 419430000   | 27  | Q61810   |
| 171.3  | 0          | 323.31 | 45626000000 | 862 | Q8K4G1-2 |
| 38.611 | 0          | 3.9091 | 34584000    | 4   | Q7TNC4-2 |
| 51.45  | 0          | 53.25  | 271750000   | 16  | Q5SUF2   |
| 38.265 | 0          | 319.47 | 1.3182E+11  | 713 | P51885   |
| 25.492 | 0          | 23.982 | 1270500000  | 18  | P70202   |
| 14.377 | 0          | 7.8344 | 257140000   | 18  | P05533   |
| 14.192 | 0          | 4.4497 | 377140000   | 9   | POCW02   |
| 23.367 | 0          | 118.96 | 3038800000  | 92  | P97823-2 |
| 24.794 | 0          | 64.718 | 874990000   | 38  | Q9WTL7   |
| 10.391 | 0.00043745 | 3.3863 | 32755000    | 5   | Q91V16   |
| 31.172 | 0          | 29.174 | 920270000   | 20  | P24668   |
| 831.87 | 0          | 25.172 | 893100000   | 17  | Q9QXZ0   |
| 35.294 | 0          | 36.916 | 1429500000  | 32  | Q922B1   |
| 115.69 | 0          | 34.374 | 468550000   | 39  | Q91W89   |
| 20.373 | 0          | 6.9    | 746460000   | 28  | Q9CXI5   |
| 59.601 | 0          | 32.635 | 435530000   | 19  | Q64133   |
| 58.557 | 0          | 78.235 | 2659800000  | 75  | Q8BW75   |
| 300.14 | 0          | 43.73  | 1569900000  | 58  | Q9QYR6   |
| 270.25 | 0          | 144.08 | 7097600000  | 208 | P14873   |
| 14.272 | 0          | 3.5532 | 515510000   | 16  | Q91VR7   |

|        |            |        |             |     |          |
|--------|------------|--------|-------------|-----|----------|
| 14.617 | 0          | 5.1098 | 702570000   | 25  | Q9CQV6   |
| 102.94 | 0          | 6.5594 | 182910000   | 22  | Q8C052   |
| 43.474 | 0          | 42.102 | 863170000   | 38  | P31938   |
| 35.836 | 0          | 5.324  | 84738000    | 7   | O09110-2 |
| 44.113 | 0          | 5.1753 | 170280000   | 2   | P47809   |
| 146.41 | 0.0081061  | 1.4339 | 210140000   | 10  | E9Q3S4   |
| 113.65 | 0          | 63.902 | 2739400000  | 108 | P27546-3 |
| 32.803 | 0.00082102 | 2.6628 | 199490000   | 12  | Q7TSJ2-3 |
| 89.309 | 0          | 12.444 | 415620000   | 30  | A2AJI0-2 |
| 41.275 | 0          | 69.159 | 1807200000  | 42  | P63085   |
| 32.327 | 0.00043178 | 3.2317 | 99126000    | 2   | P47811-4 |
| 43.066 | 0          | 25.034 | 570380000   | 14  | Q63844   |
| 30.016 | 0          | 39.497 | 1206000000  | 60  | Q61166   |
| 36.07  | 0          | 25.529 | 421780000   | 14  | Q8R001-2 |
| 31.966 | 0          | 10.395 | 258010000   | 17  | Q6PER3   |
| 101.43 | 0          | 3.9072 | 104380000   | 4   | Q68FL6   |
| 19.086 | 0.0063934  | 1.5943 | 138720000   | 9   | Q7TQJ1   |
| 43.688 | 0          | 5.8935 | 97217000    | 2   | Q3THS6   |
| 94.629 | 0          | 295.55 | 2929600000  | 106 | Q8K310   |
| 53.398 | 0          | 34.521 | 773550000   | 33  | Q8VCF0   |
| 17.069 | 0          | 46.722 | 477240000   | 44  | P04247   |
| 25.45  | 0.00042176 | 2.9705 | 32261000    | 2   | Q9Z2E1-2 |
| 25.396 | 0          | 15.16  | 501200000   | 13  | P39039   |
| 25.957 | 0.00041754 | 2.845  | 37736000    | 10  | P41317   |
| 36.975 | 0          | 12.885 | 818600000   | 38  | Q9JKP5   |
| 53.435 | 0          | 9.0025 | 82986000    | 4   | Q8CHK3   |
| 21.502 | 0          | 76.781 | 954490000   | 16  | P04370-4 |
| 66.9   | 0          | 114.65 | 12709000000 | 153 | Q8R2Y2-2 |
| 79.343 | 0          | 21.758 | 1020100000  | 33  | Q99MR8   |
| 61.378 | 0          | 78.845 | 941660000   | 37  | Q3ULD5   |
| 19.017 | 0          | 7.5184 | 252140000   | 6   | Q9D1I5   |
| 16.168 | 0.0045977  | 1.7376 | 121400000   | 15  | Q8K5B2   |
| 2.3277 | 0.0035211  | 2.0199 | 104720000   | 11  | P21843   |
| 27.203 | 0          | 46.761 | 4650800000  | 85  | P21812   |
| 23.901 | 0          | 14.571 | 323200000   | 16  | Q3UMR5-2 |
| 36.511 | 0          | 156.46 | 10138000000 | 187 | P14152   |
| 35.611 | 0          | 220.34 | 28312000000 | 356 | P08249   |
| 18.582 | 0          | 27.535 | 347110000   | 21  | Q9D967   |
| 63.953 | 0          | 236.53 | 5307400000  | 167 | P06801   |
| 52.307 | 0          | 13.873 | 1051600000  | 43  | Q9Z2D6   |
| 40.342 | 0          | 101.17 | 1318600000  | 44  | Q9DCS3   |

|        |            |        |             |     |          |
|--------|------------|--------|-------------|-----|----------|
| 164.72 | 0.0063814  | 1.5754 | 67845000    | 8   | Q80V70   |
| 33.692 | 0          | 5.2969 | 221190000   | 8   | Q91VH6   |
| 52.921 | 0          | 12.777 | 150970000   | 6   | O08663   |
| 20.578 | 0          | 5.306  | 1033800000  | 20  | P55002   |
| 28.937 | 0          | 164.71 | 48863000000 | 210 | Q9D1H9   |
| 18.538 | 0          | 17.545 | 2625600000  | 70  | Q9QZJ6   |
| 47.169 | 0          | 272.33 | 25578000000 | 341 | P21956-2 |
| 68.937 | 0          | 4.097  | 153190000   | 1   | Q80U63-2 |
| 33.387 | 0          | 40.605 | 1367000000  | 37  | O35678   |
| 12.359 | 0          | 31.032 | 679190000   | 20  | P19788   |
| 17.551 | 0          | 34.23  | 762150000   | 25  | Q91VS7   |
| 16.958 | 0          | 7.7037 | 185410000   | 9   | Q9CPU4   |
| 108.69 | 0          | 40.99  | 545220000   | 32  | Q8VDP3-2 |
| 110.07 | 0          | 5.4242 | 531490000   | 14  | Q8BML1   |
| 55.721 | 0          | 3.9843 | 85605000    | 9   | Q8BGT6-2 |
| 12.504 | 0          | 77.053 | 7177400000  | 117 | P34884   |
| 8.5669 | 0          | 47.791 | 820960000   | 16  | Q7TNS2   |
| 32.342 | 0          | 3.5043 | 157700000   | 12  | Q6ZQI3   |
| 45.932 | 0.00042463 | 3.0467 | 86177000    | 7   | Q8C7H1   |
| 14.677 | 0.0067365  | 1.562  | 29163000    | 1   | Q8K273   |
| 97.458 | 0          | 10.547 | 97491000    | 4   | Q9D071-2 |
| 60.235 | 0.0077634  | 1.4743 | 391490000   | 1   | Q61884   |
| 91.83  | 0          | 4.5659 | 88478000    | 7   | Q80UM7   |
| 6.6979 | 0.0027734  | 2.2205 | 756410000   | 21  | P56379   |
| 12.454 | 0          | 177.34 | 1417800000  | 33  | P63030   |
| 14.286 | 0          | 18.685 | 2285000000  | 86  | Q9D023   |
| 52.227 | 0          | 20.409 | 348910000   | 13  | P70290   |
| 33.097 | 0          | 6.7839 | 184820000   | 7   | Q99J99   |
| 27.621 | 0          | 34.138 | 2334600000  | 32  | P27573   |
| 164.98 | 0          | 48.707 | 1164600000  | 42  | Q61830   |
| 167.07 | 0          | 20.542 | 220740000   | 31  | Q64449   |
| 38.522 | 0          | 18.355 | 270830000   | 4   | Q8VCJ6   |
| 39.41  | 0          | 8.4501 | 281190000   | 3   | Q9CQT1   |
| 21.708 | 0.0080972  | 1.4322 | 134280000   | 1   | Q9DB15   |
| 11.101 | 0          | 26.731 | 1042800000  | 20  | Q9CQX8   |
| 93.191 | 0          | 36.735 | 412730000   | 33  | Q9WUX5-2 |
| 67.766 | 0          | 323.31 | 33981000000 | 620 | P26041   |
| 21.55  | 0          | 9.4935 | 253640000   | 13  | Q9D6Y7-3 |
| 26.832 | 0          | 21.607 | 1236100000  | 31  | Q8BU85   |
| 31.062 | 0          | 42.111 | 1946800000  | 78  | Q9CQ65   |
| 38.194 | 0          | 25.14  | 719800000   | 39  | Q922Q1   |

|        |            |        |             |      |          |
|--------|------------|--------|-------------|------|----------|
| 7.7662 | 0          | 7.6851 | 1789000000  | 16   | P03930   |
| 33.499 | 0          | 152.04 | 5292600000  | 115  | Q791V5   |
| 25.976 | 0          | 125.57 | 16372000000 | 115  | P00405   |
| 31.726 | 0          | 8.4062 | 247440000   | 3    | Q9CWE0   |
| 101.2  | 0          | 28.847 | 915400000   | 51   | Q922D8   |
| 105.73 | 0          | 17.633 | 216060000   | 14   | Q3V3R1   |
| 51.881 | 0          | 5.0315 | 62643000    | 1    | P03911   |
| 68.474 | 0          | 4.955  | 140890000   | 26   | P03921   |
| 288.79 | 0          | 5.7765 | 123330000   | 2    | Q9JLN9   |
| 12.861 | 0          | 60.624 | 4433200000  | 99   | P62774   |
| 35.623 | 0          | 5.7649 | 75017000    | 7    | P47802   |
| 29.758 | 0          | 56.191 | 905030000   | 39   | O88441   |
| 165.3  | 0          | 212.05 | 7244200000  | 234  | P28665   |
| 20.762 | 0.0008244  | 2.7303 | 101470000   | 5    | A2BIM8   |
| 82.843 | 0          | 14.325 | 454600000   | 16   | P16332   |
| 95.923 | 0          | 89.4   | 3174000000  | 107  | Q9EQK5   |
| 35.284 | 0          | 37.042 | 579430000   | 24   | O35682   |
| 152.04 | 0          | 68.577 | 916260000   | 50   | Q7TPV4   |
| 11.97  | 0          | 5.24   | 166060000   | 13   | Q9EQS3   |
| 28.683 | 0          | 5.5162 | 80750000    | 11   | P22366-2 |
| 42.722 | 0.00042662 | 3.11   | 103360000   | 3    | Q9JK81   |
| 228.99 | 0          | 323.31 | 31431000000 | 681  | Q61879   |
| 227.03 | 0          | 323.31 | 7.6441E+11  | 4868 | O08638   |
| 223.26 | 0          | 18.994 | 277080000   | 73   | O08638-2 |
| 227.76 | 0.00042159 | 2.9685 | 3226100000  | 30   | Q6URW6-2 |
| 222.86 | 0          | 323.31 | 4766000000  | 140  | Q5SX39   |
| 226.37 | 0          | 323.31 | 13723000000 | 369  | Q8VDD5   |
| 20.594 | 0          | 127.24 | 3569900000  | 59   | P05977   |
| 19.779 | 0          | 45.918 | 4746400000  | 60   | Q3THE2   |
| 16.93  | 0          | 320.72 | 1.2027E+11  | 437  | Q60605   |
| 16.961 | 0          | 102.08 | 4221400000  | 47   | Q60605-2 |
| 19.854 | 0          | 323.31 | 52355000000 | 471  | Q9CQ19   |
| 113.7  | 0          | 323.31 | 38499000000 | 659  | Q6PDN3-3 |
| 194.04 | 0.00043783 | 3.4032 | 100390000   | 2    | Q9JMH9-5 |
| 118.69 | 0.0031521  | 2.1124 | 87084000    | 1    | O88329   |
| 121.94 | 0          | 323.31 | 29376000000 | 534  | Q9WTI7   |
| 116.08 | 0          | 35.299 | 1031100000  | 64   | Q5SYD0   |
| 222.44 | 0.0074019  | 1.4809 | 115270000   | 8    | Q9QY06-3 |
| 233.32 | 0          | 78.299 | 4024100000  | 200  | Q69ZN7   |
| 11.95  | 0          | 34.215 | 267080000   | 13   | P01668   |
| 12.374 | 0.0016155  | 2.4559 | 19349000    | 3    | P01786   |

|        |            |        |            |     |          |
|--------|------------|--------|------------|-----|----------|
| 36.595 | 0          | 29.453 | 5712700000 | 66  | P01864   |
| 36.875 | 0          | 37.416 | 480370000  | 14  | P01878   |
| 36.228 | 0          | 12.708 | 867510000  | 27  | P03987-2 |
| 33.471 | 0          | 11.015 | 253290000  | 21  | Q8BR90   |
| 35.316 | 0          | 8.6343 | 445040000  | 14  | Q8C3W1   |
| 34.995 | 0          | 13.237 | 567200000  | 32  | Q91V76   |
| 22.983 | 0          | 5.8996 | 140030000  | 7   | Q6SKR2   |
| 100.96 | 0.0004268  | 3.1138 | 58976000   | 5   | Q80UM3   |
| 82.8   | 0          | 19.371 | 798160000  | 31  | Q9CZR2   |
| 23.384 | 0          | 23.727 | 634210000  | 31  | Q60817   |
| 60.273 | 0          | 6.1254 | 117930000  | 17  | Q8VBW6   |
| 47.234 | 0          | 27.059 | 496770000  | 27  | Q9QWR8   |
| 55.446 | 0          | 24.484 | 750800000  | 32  | Q99KQ4   |
| 45.345 | 0          | 18.611 | 1315400000 | 64  | P28656   |
| 42.679 | 0          | 42.475 | 993030000  | 47  | Q78ZA7   |
| 33.189 | 0          | 13.477 | 555000000  | 29  | Q9DB05   |
| 34.732 | 0.0012195  | 2.5349 | 177770000  | 8   | Q9CWZ7   |
| 58.265 | 0          | 9.839  | 220340000  | 13  | Q8CC86   |
| 64.279 | 0          | 18.008 | 389840000  | 26  | Q8BP47   |
| 22.245 | 0          | 6.5691 | 139890000  | 25  | Q91X97   |
| 80.405 | 0          | 29.927 | 1566500000 | 56  | P13595-3 |
| 45.739 | 0.0016207  | 2.5108 | 203850000  | 2   | Q8BLF1   |
| 118.52 | 0          | 44.989 | 882860000  | 36  | P28660-2 |
| 76.722 | 0          | 97.494 | 3040400000 | 76  | P09405   |
| 62.907 | 0          | 9.3234 | 173150000  | 21  | Q8VCM8   |
| 43.008 | 0          | 76.691 | 1787100000 | 46  | Q62433   |
| 39.28  | 0          | 155.07 | 3915500000 | 112 | Q9QYG0-2 |
| 8.1384 | 0.00042772 | 3.1432 | 94808000   | 3   | O35683   |
| 40.603 | 0          | 72.178 | 3424000000 | 111 | Q99LC3   |
| 14.982 | 0          | 4.8396 | 163190000  | 10  | Q9D8B4   |
| 17.086 | 0          | 25.608 | 1069100000 | 50  | Q7TMF3   |
| 16.859 | 0          | 11.055 | 886490000  | 34  | Q9ERS2   |
| 10.916 | 0          | 7.0944 | 234200000  | 13  | Q9CQ75   |
| 9.3308 | 0          | 7.2953 | 607400000  | 20  | Q9CQ91   |
| 9.3267 | 0          | 28.156 | 2915200000 | 40  | Q62425   |
| 13.36  | 0          | 12.681 | 303280000  | 15  | Q9CPP6   |
| 15.283 | 0          | 15.786 | 855870000  | 38  | Q9CQZ5   |
| 19.992 | 0          | 56.41  | 2344600000 | 85  | Q9DCJ5   |
| 42.525 | 0          | 82.792 | 2166200000 | 86  | Q9DC69   |
| 20.082 | 0          | 9.7874 | 90473000   | 8   | Q9D1H6   |
| 42.524 | 0          | 3.7244 | 28264000   | 1   | Q9CWG8-2 |

|        |            |        |             |     |          |
|--------|------------|--------|-------------|-----|----------|
| 6.954  | 0          | 18.081 | 1407100000  | 49  | P0DN34   |
| 21.024 | 0          | 53.093 | 1004800000  | 32  | Q9DCS9   |
| 11.692 | 0          | 7.2229 | 362050000   | 16  | Q9CQZ6   |
| 15.081 | 0          | 30.525 | 803790000   | 18  | Q9CQC7   |
| 21.71  | 0          | 7.9939 | 210470000   | 15  | Q9CQH3   |
| 15.515 | 0          | 7.1233 | 238260000   | 5   | Q3UIU2   |
| 16.331 | 0          | 9.7686 | 427680000   | 19  | Q9CR61   |
| 21.984 | 0          | 14.752 | 943290000   | 38  | Q9CQJ8   |
| 14.164 | 0          | 57.679 | 1129400000  | 34  | Q9CQ54   |
| 79.776 | 0          | 171.34 | 4432900000  | 130 | Q91VD9   |
| 52.625 | 0          | 69.062 | 3000000000  | 96  | Q91WD5   |
| 30.149 | 0          | 65.742 | 1815500000  | 83  | Q9DCT2   |
| 19.784 | 0          | 21.527 | 783270000   | 29  | Q9CXZ1   |
| 12.648 | 0          | 27.959 | 1062700000  | 40  | Q99LY9   |
| 13.02  | 0          | 26.351 | 493340000   | 27  | P52503   |
| 24.683 | 0          | 30.707 | 775130000   | 10  | Q9DC70   |
| 24.038 | 0          | 27.041 | 1505700000  | 51  | Q8K3J1   |
| 50.834 | 0          | 65.787 | 3118900000  | 88  | Q91YT0   |
| 27.285 | 0          | 26.196 | 863460000   | 23  | Q9D6J6   |
| 11.813 | 0.0070423  | 1.4943 | 57891000    | 1   | Q8BK30   |
| 31.113 | 0          | 22.704 | 339550000   | 11  | Q9DC07   |
| 102.71 | 0          | 71.412 | 2849000000  | 114 | P46935   |
| 8.9723 | 0          | 9.5619 | 912830000   | 40  | P29595   |
| 95.915 | 0          | 71.902 | 268290000   | 11  | P08553   |
| 66.275 | 0.0042487  | 1.8597 | 2600100000  | 27  | Q922L6   |
| 201.77 | 0          | 24.355 | 318440000   | 23  | Q6P5H2-2 |
| 72.107 | 0          | 4.6751 | 250700000   | 17  | Q7TPW1   |
| 47.471 | 0.0035294  | 2.0459 | 68944000    | 5   | P97863-3 |
| 47.775 | 0          | 13.191 | 104810000   | 7   | P70255-2 |
| 44.637 | 0          | 21.283 | 295290000   | 11  | P70257-2 |
| 28.567 | 0.00042608 | 3.1009 | 193220000   | 7   | Q9QZ23   |
| 71.415 | 0          | 19.523 | 219440000   | 10  | Q8CHT1-2 |
| 14.173 | 0          | 23.827 | 515480000   | 13  | Q9D0T1   |
| 136.54 | 0          | 214.84 | 10405000000 | 251 | P10493   |
| 153.91 | 0          | 77.896 | 2327700000  | 110 | O88322   |
| 41.745 | 0          | 9.8897 | 157190000   | 30  | Q9EQ80   |
| 16.555 | 0          | 21.747 | 356660000   | 7   | O70131   |
| 31.886 | 0          | 25.085 | 732880000   | 46  | Q8VDK1-2 |
| 30.501 | 0          | 52.336 | 70507000000 | 84  | Q9JHW2   |
| 107.83 | 0          | 16.752 | 236710000   | 8   | Q3TL44   |
| 17.208 | 0          | 19.433 | 739640000   | 28  | P15532   |



|        |            |        |             |     |          |
|--------|------------|--------|-------------|-----|----------|
| 17.363 | 0          | 100.64 | 1141300000  | 280 | Q01768   |
| 19.099 | 0          | 5.5375 | 57244000    | 2   | Q9WV85   |
| 34.376 | 0          | 9.8887 | 106640000   | 3   | Q8K2T1   |
| 56.888 | 0          | 18.758 | 632670000   | 18  | O70310   |
| 113.84 | 0          | 105.42 | 4012400000  | 177 | Q61941   |
| 54.54  | 0          | 131.97 | 1571700000  | 56  | Q99K48   |
| 60.342 | 0          | 16.113 | 251650000   | 21  | Q6DFW4   |
| 244.25 | 0          | 3.8101 | 76978000    | 14  | Q61982   |
| 38.928 | 0          | 21.44  | 718980000   | 27  | Q64299   |
| 55.939 | 0          | 27.324 | 375550000   | 9   | Q6NSR8   |
| 103.32 | 0          | 87.712 | 1948200000  | 71  | Q11011   |
| 32.56  | 0          | 78.436 | 2034500000  | 73  | Q61937   |
| 64.944 | 0          | 28.95  | 453550000   | 15  | Q91V88-3 |
| 67.061 | 0          | 198.52 | 18017000000 | 341 | Q91V88-4 |
| 30.821 | 0          | 13.71  | 1480800000  | 53  | P97300-3 |
| 30.959 | 0          | 42.262 | 924710000   | 49  | Q64669   |
| 26.248 | 0          | 11.963 | 422280000   | 21  | Q9JI75   |
| 82.613 | 0          | 37.691 | 803290000   | 48  | P46460   |
| 40.709 | 0          | 26.353 | 459850000   | 20  | Q9CZ44   |
| 23.076 | 0          | 119.43 | 1301600000  | 41  | Q9JM14   |
| 63.864 | 0          | 5.7513 | 210410000   | 8   | Q61503   |
| 67.81  | 0          | 24.582 | 1391200000  | 67  | O09118   |
| 53.408 | 0          | 25.642 | 734550000   | 40  | Q02819   |
| 50.304 | 0          | 4.8178 | 162780000   | 17  | P81117   |
| 38.358 | 0          | 11.593 | 636610000   | 24  | O35685   |
| 18.593 | 0.0057186  | 1.7105 | 145150000   | 15  | P0C028   |
| 21.825 | 0          | 3.5897 | 159030000   | 9   | Q6P3D0   |
| 35.693 | 0          | 8.9773 | 46732000    | 12  | Q3U2V3   |
| 26.24  | 0          | 15.011 | 630740000   | 52  | Q9CQF3   |
| 35.197 | 0.0053476  | 1.725  | 660610000   | 16  | Q8CH40   |
| 18.648 | 0.00042391 | 3.0135 | 23457000    | 2   | Q99P30-5 |
| 235.63 | 0          | 8.5613 | 343860000   | 18  | E9Q7G0   |
| 128.62 | 0          | 5.6426 | 190920000   | 3   | Q8R0G9   |
| 155.12 | 0          | 11.187 | 107750000   | 9   | Q99P88   |
| 94.529 | 0          | 4.9092 | 34214000    | 1   | Q9Z0W3-2 |
| 93.28  | 0          | 13.388 | 168480000   | 10  | Q8BJ71   |
| 14.478 | 0          | 133.79 | 3131600000  | 75  | P61971   |
| 203.07 | 0.0060675  | 1.6698 | 977790000   | 10  | Q5DTZ0   |
| 48.354 | 0          | 180.85 | 7200600000  | 200 | P29758   |
| 20.848 | 0          | 7.4642 | 139020000   | 17  | Q9CRD0-3 |
| 116.45 | 0          | 323.31 | 24421000000 | 613 | Q60597   |

|        |            |        |             |     |          |
|--------|------------|--------|-------------|-----|----------|
| 34.012 | 0          | 323.31 | 1.3698E+11  | 461 | Q62000   |
| 44.729 | 0          | 45.782 | 2347100000  | 76  | Q9CZ30   |
| 49.745 | 0.0077691  | 1.4775 | 2584500000  | 5   | O35103   |
| 111.34 | 0          | 75.463 | 1502000000  | 48  | P58281   |
| 23.895 | 0          | 7.6609 | 289420000   | 19  | Q60590   |
| 61.67  | 0          | 34.802 | 472040000   | 28  | Q3B7Z2-2 |
| 83.628 | 0.00043516 | 3.3181 | 65219000    | 6   | Q8CI95   |
| 96.965 | 0          | 18.455 | 309320000   | 15  | Q9DBS9   |
| 71.527 | 0          | 5.6757 | 125070000   | 11  | A2A8Z1-2 |
| 36.3   | 0          | 4.9139 | 135020000   | 5   | Q8BWU5   |
| 16.815 | 0          | 3.7166 | 595770000   | 1   | Q78XF5   |
| 23.782 | 0          | 22.857 | 1264100000  | 36  | Q62422   |
| 31.27  | 0          | 40.722 | 2014200000  | 85  | Q7TQI3   |
| 55.988 | 0          | 323.31 | 11647000000 | 285 | Q9D0K2   |
| 58.213 | 0          | 7.8291 | 382380000   | 22  | Q6P9R2   |
| 57.058 | 0          | 255.32 | 12200000000 | 285 | P09103   |
| 37.971 | 0          | 14.284 | 731850000   | 34  | P50580-2 |
| 70.67  | 0          | 39.645 | 2425100000  | 87  | P29341   |
| 31.044 | 0          | 7.6269 | 163710000   | 5   | Q8CCS6-2 |
| 55.832 | 0          | 32.2   | 1300300000  | 36  | Q9WVE8   |
| 46.67  | 0          | 13.267 | 405330000   | 23  | P63005   |
| 25.581 | 0          | 54.457 | 1709900000  | 61  | Q61206   |
| 47.006 | 0          | 20.496 | 640640000   | 41  | Q9DCL9   |
| 57.93  | 0          | 15.805 | 868510000   | 38  | Q8CIN4   |
| 72.367 | 0          | 42.71  | 2701200000  | 64  | Q9ET54-3 |
| 41.614 | 0.0035405  | 2.0819 | 189730000   | 2   | Q9Z0P4   |
| 55.446 | 0.0064127  | 1.6149 | 84178000    | 3   | Q8C0L6   |
| 138.9  | 0          | 9.4414 | 257560000   | 4   | Q9EPX2   |
| 70.35  | 0          | 10.901 | 232810000   | 16  | O88428   |
| 20.021 | 0          | 228.22 | 14904000000 | 231 | Q99LX0   |
| 79.916 | 0          | 13.451 | 85397000    | 6   | Q8BZ20   |
| 59.452 | 0          | 29.369 | 790510000   | 18  | Q3ULW8-2 |
| 42.329 | 0          | 99.888 | 6954700000  | 165 | Q9EPC1   |
| 41.669 | 0          | 15.949 | 103280000   | 9   | Q9ES46   |
| 30.944 | 0          | 74.527 | 2045100000  | 35  | Q925B0-2 |
| 183.66 | 0.003528   | 2.045  | 28103000    | 1   | Q8BSQ9-2 |
| 81.163 | 0          | 138.92 | 2436800000  | 87  | Q3TVI8   |
| 129.68 | 0          | 167.15 | 6119000000  | 207 | Q05920   |
| 37.497 | 0          | 110.89 | 5588300000  | 95  | P60335   |
| 34.917 | 0          | 27.795 | 1746900000  | 47  | Q61990-2 |
| 79.921 | 0          | 60.624 | 953710000   | 59  | Q91ZA3   |

|        |            |        |             |     |          |
|--------|------------|--------|-------------|-----|----------|
| 58.408 | 0          | 55.298 | 1351700000  | 69  | Q99MN9   |
| 70.527 | 0          | 65.233 | 1173000000  | 57  | Q8BH04   |
| 24.634 | 0          | 110.01 | 2066200000  | 65  | P23506   |
| 50.167 | 0          | 26.88  | 801810000   | 34  | Q61398   |
| 56.494 | 0          | 18.915 | 380920000   | 26  | Q9CQF9   |
| 54.874 | 0          | 9.6084 | 151790000   | 3   | Q8C7K6   |
| 41.666 | 0          | 4.6546 | 47956000    | 2   | P49586   |
| 24.715 | 0          | 16.604 | 647220000   | 17  | Q8VE70   |
| 14.275 | 0          | 41.401 | 877840000   | 31  | P56812   |
| 21.663 | 0          | 39.067 | 2311500000  | 91  | P12815-2 |
| 96.023 | 0          | 171.74 | 5475100000  | 202 | Q9WU78   |
| 23.277 | 0          | 6.8154 | 110690000   | 5   | Q8BFQ8   |
| 124.51 | 0          | 64.268 | 1157200000  | 52  | Q9Z0X4   |
| 98.406 | 0          | 8.5355 | 219720000   | 8   | Q8CG03   |
| 122.8  | 0          | 14.335 | 599000000   | 17  | P05622   |
| 43.231 | 0          | 192.57 | 5102400000  | 140 | P35486   |
| 38.937 | 0          | 137.86 | 7622500000  | 157 | Q9D051   |
| 53.998 | 0          | 7.7257 | 220620000   | 4   | Q8BKZ9   |
| 56.678 | 0          | 323.31 | 27091000000 | 452 | P27773   |
| 71.982 | 0          | 61.893 | 2465000000  | 103 | P08003   |
| 59.266 | 0          | 9.6797 | 220090000   | 4   | Q921X9   |
| 48.1   | 0          | 107.8  | 3623300000  | 150 | Q922R8   |
| 48.994 | 0.00043573 | 3.323  | 32204000    | 1   | Q8BFP9   |
| 46.04  | 0          | 12.221 | 120140000   | 5   | Q9JK42   |
| 47.922 | 0          | 6.5476 | 793460000   | 12  | Q922H2   |
| 35.774 | 0          | 323.31 | 21163000000 | 319 | O70400   |
| 34.299 | 0          | 315.54 | 9836600000  | 218 | O70209   |
| 35.556 | 0          | 114.1  | 2918800000  | 79  | P70271   |
| 63.299 | 0          | 85.369 | 5905700000  | 153 | Q8CI51   |
| 50.118 | 0          | 292.67 | 25725000000 | 384 | Q3TJD7   |
| 61.18  | 0.00082372 | 2.7182 | 80962000    | 16  | Q3UV70   |
| 150.33 | 0.00043141 | 3.2149 | 61518000    | 7   | Q6A026   |
| 164.42 | 0          | 8.7775 | 401390000   | 16  | Q4VA53   |
| 28.599 | 0          | 3.9923 | 5961400000  | 49  | Q33DR3-3 |
| 78.542 | 0.000819   | 2.6129 | 130500000   | 3   | Q99K01-3 |
| 35.015 | 0          | 38.956 | 1144300000  | 56  | Q8K183   |
| 15.054 | 0          | 17.86  | 1028000000  | 41  | Q62048   |
| 20.83  | 0          | 189.7  | 16940000000 | 201 | P70296   |
| 69.823 | 0          | 11.371 | 535620000   | 2   | Q08481-4 |
| 29.227 | 0          | 29.237 | 813480000   | 45  | Q8BFY6   |
| 55.028 | 0.00043159 | 3.2235 | 124320000   | 15  | Q11136   |

|        |            |        |             |     |          |
|--------|------------|--------|-------------|-----|----------|
| 22.774 | 0          | 8.0629 | 109880000   | 5   | Q8VCI5-2 |
| 66.805 | 0          | 4.1485 | 32469000    | 7   | O09012-2 |
| 11.243 | 0          | 17.785 | 1585800000  | 81  | Q9Z126   |
| 16.534 | 0          | 26.816 | 374120000   | 8   | O70591   |
| 17.356 | 0          | 32.987 | 387740000   | 31  | Q9WU28   |
| 14.454 | 0.0023847  | 2.2503 | 226960000   | 16  | Q03958   |
| 85.359 | 0          | 64.785 | 1593300000  | 57  | P12382   |
| 85.268 | 0          | 64.533 | 1627100000  | 63  | P47857   |
| 85.454 | 0          | 221.12 | 4594600000  | 175 | Q9WUA3   |
| 14.957 | 0          | 165.25 | 32217000000 | 372 | P62962   |
| 28.832 | 0          | 157.17 | 11830000000 | 229 | Q9DBJ1   |
| 53.247 | 0          | 107.51 | 3751800000  | 83  | Q9DCD0   |
| 44.55  | 0          | 235.17 | 12683000000 | 345 | P09411   |
| 27.254 | 0          | 173.37 | 7195300000  | 178 | Q9CQ60   |
| 61.417 | 0          | 138.01 | 6443600000  | 144 | Q9D0F9   |
| 68.747 | 0.00043048 | 3.1931 | 89233000    | 11  | Q7TSV4   |
| 59.452 | 0          | 7.3891 | 154390000   | 5   | Q9CYR6   |
| 62.219 | 0          | 323.31 | 48992000000 | 598 | Q8BZF8   |
| 34.54  | 0          | 11.813 | 697340000   | 22  | Q8CHP8   |
| 21.694 | 0          | 31.59  | 2166300000  | 68  | O55022   |
| 23.334 | 0          | 6.277  | 339810000   | 8   | Q80UU9   |
| 29.82  | 0          | 144.81 | 5776000000  | 124 | P67778   |
| 33.296 | 0          | 46.794 | 2406300000  | 103 | O35129   |
| 56.585 | 0          | 5.5411 | 71166000    | 9   | Q61753   |
| 32.517 | 0.0070579  | 1.5047 | 51149000    | 2   | Q9DB26   |
| 29.15  | 0          | 49.877 | 2475600000  | 66  | Q8BS03   |
| 237.04 | 0          | 21.882 | 317550000   | 9   | E9Q3L2   |
| 64.647 | 0          | 156.28 | 4082400000  | 98  | Q7M6Y3-2 |
| 61.71  | 0          | 6.9077 | 123110000   | 3   | Q6PD26   |
| 83.516 | 0.0053456  | 1.7231 | 59626000    | 1   | P26450   |
| 18.37  | 0          | 6.4238 | 233560000   | 11  | Q9QUR7   |
| 46.151 | 0.0067416  | 1.5654 | 33659000    | 9   | O70172   |
| 32.066 | 0.0023828  | 2.2401 | 51076000    | 10  | Q9D711   |
| 31.893 | 0          | 42.574 | 1000100000  | 48  | P53810   |
| 31.487 | 0          | 5.6513 | 191680000   | 2   | P53811   |
| 112.84 | 0          | 14.869 | 566130000   | 31  | Q8K411-3 |
| 57.844 | 0          | 323.31 | 69451000000 | 786 | P52480   |
| 57.984 | 0          | 37.514 | 7114700000  | 67  | P52480-2 |
| 104.41 | 0.00042735 | 3.128  | 85396000    | 16  | P70268   |
| 17.872 | 0          | 5.7932 | 28413000    | 3   | Q8R3U1   |
| 85.221 | 0          | 54.811 | 623750000   | 25  | P47713   |

|        |            |        |             |      |          |
|--------|------------|--------|-------------|------|----------|
| 133.33 | 0.00042265 | 2.9869 | 141260000   | 1    | Q9Z1B3-2 |
| 139.49 | 0          | 30.797 | 419720000   | 19   | P51432   |
| 85.872 | 0          | 125.82 | 4715000000  | 156  | Q8R3B1   |
| 533.5  | 0          | 323.31 | 12567000000 | 496  | Q9QXS1-2 |
| 90.807 | 0          | 74.004 | 2763500000  | 100  | P20918   |
| 55.595 | 0          | 271.12 | 8166300000  | 185  | Q8CGN5   |
| 47.262 | 0          | 88.425 | 1930300000  | 83   | Q9DBG5   |
| 139.41 | 0          | 282.98 | 8999300000  | 235  | O88492   |
| 84.921 | 0          | 5.2015 | 147520000   | 6    | Q9R0E1   |
| 16.607 | 0.00042827 | 3.1526 | 401440000   | 8    | Q9R1Q7   |
| 70.741 | 0          | 323.31 | 30431000000 | 464  | Q99K51   |
| 31.802 | 0          | 3.5141 | 170710000   | 4    | Q9JIZ9   |
| 59.616 | 0.00043917 | 3.4198 | 115410000   | 11   | Q9DC11   |
| 206.23 | 0          | 16.481 | 311640000   | 11   | B2RXS4   |
| 93.262 | 0.00043937 | 3.4261 | 90746000    | 8    | Q60953-2 |
| 58.278 | 0          | 25.934 | 836080000   | 19   | Q9DC61   |
| 82.435 | 0          | 4.7599 | 90448000    | 5    | O35691   |
| 32.277 | 0          | 40.226 | 1302600000  | 62   | P23492   |
| 68.717 | 0          | 23.464 | 793460000   | 30   | Q7TQ62   |
| 49.429 | 0          | 5.35   | 137710000   | 9    | Q8VHI3   |
| 46.379 | 0          | 11.802 | 146710000   | 16   | Q8BYB9   |
| 17.143 | 0          | 3.6275 | 184740000   | 16   | Q923G2   |
| 39.565 | 0          | 7.726  | 107020000   | 11   | P52430   |
| 39.617 | 0          | 17.749 | 275190000   | 29   | Q62086   |
| 39.351 | 0          | 60.972 | 2323300000  | 85   | Q62087   |
| 77.043 | 0          | 52.977 | 2396400000  | 93   | P37040   |
| 89.986 | 0          | 323.31 | 2.0418E+11  | 1618 | Q62009-3 |
| 87.098 | 0.00042499 | 3.0598 | 978170000   | 18   | Q62009-5 |
| 32.667 | 0          | 38.081 | 1359200000  | 48   | Q9D819   |
| 38.114 | 0          | 18.452 | 746290000   | 12   | Q91VM9   |
| 17.971 | 0          | 309.55 | 85419000000 | 440  | P17742   |
| 23.713 | 0          | 61.234 | 5868300000  | 147  | P24369   |
| 22.794 | 0          | 7.3941 | 498250000   | 26   | P30412   |
| 40.742 | 0          | 15.473 | 648060000   | 39   | Q9CR16   |
| 204    | 0          | 5.2147 | 228380000   | 14   | Q9R269   |
| 42.888 | 0.00042248 | 2.9835 | 98181000    | 16   | P36993-4 |
| 42.256 | 0          | 11.175 | 364130000   | 23   | Q8BVQ5   |
| 37.54  | 0          | 11.612 | 475650000   | 14   | P62137   |
| 37.186 | 0          | 259.9  | 12795000000 | 279  | P62141   |
| 36.983 | 0          | 6.3919 | 82346000    | 3    | P63087   |
| 111.81 | 0          | 150.28 | 9416000000  | 190  | Q9DBR7-2 |

|        |           |        |             |      |          |
|--------|-----------|--------|-------------|------|----------|
| 109.05 | 0         | 11.159 | 488510000   | 13   | Q8BG95   |
| 84.684 | 0         | 19.555 | 310680000   | 9    | Q3UMT1   |
| 16.649 | 0         | 59.125 | 4231400000  | 76   | Q91VC7   |
| 41.291 | 0         | 59.983 | 1174300000  | 50   | Q3UM45   |
| 35.608 | 0         | 53.639 | 1830500000  | 46   | P63330   |
| 65.322 | 0         | 219.46 | 10591000000 | 406  | Q76MZ3   |
| 51.691 | 0         | 35.226 | 717800000   | 35   | Q6P1F6   |
| 36.71  | 0         | 54.082 | 2058500000  | 71   | P58389   |
| 56.346 | 0         | 8.4112 | 158380000   | 6    | Q6PD03   |
| 52.817 | 0         | 18.379 | 382640000   | 23   | Q60996-2 |
| 35.159 | 0.002004  | 2.3458 | 101350000   | 2    | Q9CQR6   |
| 56.752 | 0         | 4.0598 | 26807000    | 7    | Q922D4-4 |
| 34.49  | 0         | 34.706 | 684690000   | 42   | O88531   |
| 19.478 | 0         | 7.3057 | 298080000   | 23   | Q9JIG8   |
| 22.176 | 0         | 126.06 | 20435000000 | 343  | P35700   |
| 21.778 | 0         | 128.55 | 7452700000  | 170  | Q61171   |
| 28.127 | 0         | 41.218 | 2210800000  | 60   | P20108   |
| 31.052 | 0         | 52.991 | 3196600000  | 77   | O08807   |
| 17.015 | 0         | 135.57 | 9311100000  | 211  | P99029-2 |
| 24.87  | 0         | 303.85 | 10994000000 | 234  | O08709   |
| 43.292 | 0         | 323.31 | 1.0067E+11  | 1022 | Q9JK53   |
| 80.751 | 0         | 19.059 | 347460000   | 20   | Q9QUR6   |
| 63.928 | 0         | 15.152 | 426710000   | 31   | Q5EG47   |
| 39.802 | 0         | 9.6618 | 477640000   | 28   | P05132-2 |
| 37.52  | 0         | 28.624 | 600340000   | 22   | O54950   |
| 43.185 | 0         | 31.737 | 976600000   | 40   | Q9DBC7   |
| 45.389 | 0         | 33.394 | 418340000   | 32   | P12367   |
| 46.167 | 0         | 55.874 | 656720000   | 15   | P31324   |
| 76.851 | 0         | 13.748 | 79315000    | 5    | P20444   |
| 77.546 | 0         | 18.485 | 366670000   | 21   | P28867   |
| 27.853 | 0         | 114.51 | 12795000000 | 176  | Q91VJ2   |
| 58.792 | 0         | 19.846 | 361230000   | 14   | O08795   |
| 77.789 | 0         | 66.347 | 1391600000  | 82   | P0C605-2 |
| 34.371 | 0         | 5.8702 | 68205000    | 2    | Q9WTX2   |
| 51.818 | 0.0038745 | 1.899  | 21736000    | 6    | P33587   |
| 27.189 | 0         | 8.6676 | 195100000   | 13   | Q64695   |
| 30.048 | 0         | 35.878 | 758910000   | 31   | Q9Z2Y8   |
| 55.238 | 0         | 20.406 | 454600000   | 20   | Q99KP6   |
| 273.61 | 0         | 34.303 | 924650000   | 55   | Q99PV0   |
| 52.686 | 0         | 91.708 | 731740000   | 40   | P15331-3 |
| 34.834 | 0         | 27.638 | 577740000   | 35   | Q9D7G0   |

|        |            |        |            |     |          |
|--------|------------|--------|------------|-----|----------|
| 39.431 | 0          | 25.154 | 429220000  | 24  | Q9D0M1   |
| 46.297 | 0          | 7.4717 | 91331000   | 2   | Q3UPH1   |
| 61.422 | 0          | 30.89  | 2195600000 | 110 | Q61207   |
| 37.425 | 0          | 12.728 | 524960000  | 28  | Q99JF8-2 |
| 29.546 | 0          | 99.351 | 3186400000 | 90  | Q9R1P4   |
| 25.926 | 0          | 45.816 | 1967200000 | 75  | P49722   |
| 28.405 | 0          | 6.8405 | 1078000000 | 36  | O70435   |
| 29.47  | 0          | 100.88 | 1498100000 | 35  | Q9R1P0   |
| 26.411 | 0          | 80.64  | 2031100000 | 55  | Q9Z2U1   |
| 27.372 | 0          | 23.282 | 1536200000 | 82  | Q9QUM9   |
| 27.855 | 0          | 30.045 | 1901900000 | 57  | Q9Z2U0   |
| 26.372 | 0          | 76.256 | 3271100000 | 82  | O09061   |
| 22.906 | 0          | 63.027 | 2473500000 | 57  | Q9R1P3   |
| 22.965 | 0          | 17.458 | 777680000  | 48  | Q9R1P1   |
| 29.116 | 0          | 14.993 | 493570000  | 31  | P99026   |
| 28.532 | 0          | 28.096 | 264070000  | 20  | O55234   |
| 25.378 | 0          | 11.481 | 686120000  | 24  | Q60692   |
| 29.891 | 0          | 9.1907 | 472660000  | 21  | P70195   |
| 49.184 | 0          | 26.913 | 837380000  | 45  | P62192   |
| 48.647 | 0          | 18.385 | 1181400000 | 34  | P46471   |
| 49.548 | 0          | 82.727 | 1915900000 | 63  | O88685   |
| 47.408 | 0          | 98.049 | 2322100000 | 79  | P54775   |
| 45.626 | 0          | 57.674 | 1157000000 | 47  | P62196   |
| 44.172 | 0          | 40.737 | 1350800000 | 61  | P62334   |
| 105.73 | 0          | 49.369 | 1670200000 | 57  | Q3TXS7   |
| 47.436 | 0          | 43.664 | 1991000000 | 90  | Q8BG32   |
| 52.895 | 0          | 14.579 | 836550000  | 38  | Q9D8W5   |
| 42.809 | 0          | 35.65  | 791470000  | 37  | Q9WVJ2   |
| 34.577 | 0          | 70.878 | 1260500000 | 45  | O35593   |
| 100.2  | 0          | 122.23 | 3316200000 | 182 | Q8VDM4   |
| 60.718 | 0          | 28.475 | 408880000  | 33  | P14685   |
| 40.703 | 0          | 12.742 | 451520000  | 7   | O35226   |
| 55.971 | 0          | 28.086 | 1129200000 | 59  | Q8BJY1   |
| 45.536 | 0          | 8.2363 | 258150000  | 13  | Q99JI4   |
| 36.539 | 0          | 53.043 | 1792700000 | 89  | P26516   |
| 39.93  | 0          | 12.092 | 519830000  | 28  | Q9CX56   |
| 24.72  | 0          | 19.058 | 377900000  | 10  | Q9CR00   |
| 28.673 | 0          | 92.066 | 4072500000 | 118 | P97371   |
| 27.057 | 0          | 158.7  | 3064100000 | 120 | P97372   |
| 33.104 | 0.00043725 | 3.3725 | 36099000   | 5   | Q9JK23   |
| 56.477 | 0          | 225.62 | 6705500000 | 209 | P17225   |

|        |            |        |             |     |          |
|--------|------------|--------|-------------|-----|----------|
| 57.488 | 0.0070632  | 1.512  | 90707000    | 3   | Q91Z31   |
| 77.795 | 0          | 7.4684 | 75206000    | 1   | Q14C51   |
| 28.617 | 0          | 4.5498 | 143960000   | 2   | Q60866-2 |
| 43.323 | 0          | 31.806 | 532450000   | 10  | Q8BWM0   |
| 18.721 | 0          | 14.036 | 1925500000  | 42  | Q9R0Q7   |
| 98.72  | 0.0035156  | 2.0083 | 68482000    | 4   | Q9WV91   |
| 57.046 | 0          | 323.31 | 37593000000 | 532 | O35074   |
| 35.56  | 0          | 8.254  | 175620000   | 13  | Q91YR9   |
| 34.449 | 0          | 11.426 | 334650000   | 9   | Q8VDQ1-2 |
| 69.042 | 0          | 10.97  | 952890000   | 15  | P22437   |
| 11.43  | 0          | 3.4349 | 353580000   | 16  | Q9D0J8   |
| 19.127 | 0          | 10.379 | 221160000   | 14  | O70274   |
| 68.034 | 0          | 34.085 | 508300000   | 34  | P35235-2 |
| 86.525 | 0          | 7.714  | 44691000    | 10  | P35831   |
| 184.96 | 0          | 7.2781 | 82457000    | 3   | Q6PB44-2 |
| 130.85 | 0          | 5.4691 | 13312000    | 2   | P06800-6 |
| 43.953 | 0          | 323.31 | 40141000000 | 437 | O54724   |
| 19.526 | 0          | 12.771 | 399260000   | 30  | Q8R2Y8   |
| 54.028 | 0.00041946 | 2.9129 | 244040000   | 12  | Q3UEB3-3 |
| 34.883 | 0          | 57.301 | 1038100000  | 50  | P42669   |
| 165.1  | 0          | 14.652 | 219430000   | 20  | Q3UQ28   |
| 60.811 | 0          | 71.062 | 1421500000  | 46  | Q8VI36-2 |
| 96.729 | 0          | 168.53 | 8251600000  | 302 | Q8CI94   |
| 97.462 | 0          | 145.49 | 846310000   | 41  | Q9ET01   |
| 97.285 | 0          | 215.34 | 9313900000  | 330 | Q9WUB3   |
| 87.676 | 0          | 83.115 | 2030700000  | 92  | Q8BML9   |
| 25.57  | 0          | 24.606 | 1686800000  | 49  | Q8BVI4   |
| 13.373 | 0          | 22.137 | 827780000   | 32  | Q8R404   |
| 35.226 | 0          | 3.4799 | 111530000   | 4   | Q9QYS9-8 |
| 22.541 | 0          | 7.4031 | 1498600000  | 43  | P61027   |
| 24.489 | 0          | 86.529 | 1493600000  | 43  | P46638   |
| 27.328 | 0.00041597 | 2.8139 | 105080000   | 12  | P35283   |
| 23.897 | 0          | 36.507 | 1900400000  | 30  | Q91V41   |
| 23.035 | 0          | 11.953 | 388830000   | 35  | P35293   |
| 22.677 | 0          | 45.53  | 2513500000  | 104 | P62821   |
| 22.187 | 0          | 18.197 | 631420000   | 55  | Q9D1G1   |
| 24.106 | 0          | 17.466 | 1113100000  | 30  | P35282   |
| 24.56  | 0          | 3.6087 | 81549000    | 16  | Q99P58   |
| 23.547 | 0          | 16.094 | 546620000   | 13  | P53994   |
| 29.1   | 0.00042918 | 3.1654 | 165840000   | 11  | Q64008   |
| 23.025 | 0          | 127.86 | 704370000   | 20  | Q6PHN9   |



|        |            |        |            |     |          |
|--------|------------|--------|------------|-----|----------|
| 23.598 | 0          | 14.942 | 321810000  | 7   | Q9CQD1   |
| 23.707 | 0          | 41.825 | 2132100000 | 80  | P61021   |
| 23.412 | 0          | 34.501 | 772530000  | 32  | P35278   |
| 23.461 | 0          | 11.643 | 554410000  | 29  | P61294   |
| 23.489 | 0          | 86.812 | 1766700000 | 95  | P51150   |
| 23.668 | 0          | 9.5674 | 217980000  | 5   | P55258   |
| 23.603 | 0.00043764 | 3.3944 | 112920000  | 5   | P61028   |
| 21.45  | 0          | 51.781 | 8934600000 | 143 | P63001   |
| 43.512 | 0          | 26.29  | 816580000  | 17  | P54728   |
| 23.553 | 0          | 3.4492 | 678020000  | 18  | P63321   |
| 31.198 | 0.0012235  | 2.5706 | 120160000  | 5   | Q64012-2 |
| 24.423 | 0          | 44.216 | 3149100000 | 67  | P62827   |
| 23.596 | 0          | 32.863 | 1445800000 | 34  | P34022   |
| 341.12 | 0          | 17.142 | 263790000  | 16  | Q9ERU9   |
| 63.53  | 0.00081967 | 2.6538 | 27378000   | 6   | P46061   |
| 20.987 | 0          | 15.535 | 1247800000 | 35  | P62835   |
| 20.825 | 0          | 198.18 | 8528900000 | 148 | Q99JI6   |
| 20.745 | 0.0023876  | 2.2632 | 22042000   | 3   | Q8BU31   |
| 18.349 | 0          | 11.506 | 580880000  | 15  | Q9DD06   |
| 75.673 | 0          | 43.996 | 2154800000 | 95  | Q9D0I9   |
| 79.381 | 0          | 7.8069 | 64452000   | 9   | Q9CW46   |
| 47.655 | 0          | 20.175 | 672380000  | 46  | Q60972   |
| 47.789 | 0.0060813  | 1.6824 | 160590000  | 2   | Q60973   |
| 20.911 | 0          | 45.619 | 4785500000 | 82  | O88851   |
| 69.448 | 0          | 5.1052 | 36243000   | 6   | Q8C2Q3   |
| 106.08 | 0.0094925  | 1.373  | 218350000  | 10  | Q8R3C6   |
| 99.551 | 0.00043497 | 3.3146 | 316360000  | 9   | B2RY56   |
| 16.604 | 0          | 54.923 | 1700100000 | 40  | O89086   |
| 58.683 | 0          | 13.552 | 255810000  | 17  | Q8VH51-2 |
| 42.161 | 0          | 5.2376 | 205550000  | 16  | Q91VM5   |
| 15.846 | 0          | 107.88 | 8040500000 | 190 | Q00915   |
| 23.206 | 0          | 6.0923 | 153690000  | 15  | Q00724   |
| 21.816 | 0          | 52.4   | 2350900000 | 67  | Q9WVB0   |
| 22.462 | 0.0042471  | 1.8529 | 179860000  | 8   | Q8VC52   |
| 44.93  | 0.0023904  | 2.2756 | 66662000   | 11  | Q8VE37   |
| 37.27  | 0          | 15.689 | 162430000  | 9   | Q8BP92   |
| 38.001 | 0          | 58.708 | 1185200000 | 41  | Q8BH97   |
| 35.147 | 0          | 6.6248 | 198450000  | 11  | Q9QYF1   |
| 36.365 | 0          | 7.325  | 94860000   | 7   | Q9ERI6   |
| 68.542 | 0          | 20.18  | 290660000  | 29  | P26043   |
| 21.05  | 0          | 14.491 | 619720000  | 17  | Q60870   |

|        |           |        |             |     |          |
|--------|-----------|--------|-------------|-----|----------|
| 26.738 | 0         | 13.142 | 172730000   | 12  | Q9D8S4   |
| 27.61  | 0.0067214 | 1.5468 | 451080000   | 10  | Q99PG4   |
| 21.782 | 0         | 90.048 | 10011000000 | 186 | Q9QUI0   |
| 22.123 | 0.0012205 | 2.5426 | 238460000   | 13  | P62746   |
| 22.006 | 0         | 3.7044 | 603280000   | 8   | Q62159   |
| 22.645 | 0.0063742 | 1.5716 | 11630000    | 3   | Q8R527   |
| 72.241 | 0         | 9.533  | 539950000   | 35  | Q8BG51   |
| 47.323 | 0         | 27.713 | 328670000   | 24  | Q9JJC6   |
| 35     | 0         | 5.5579 | 176040000   | 18  | Q9DCV4   |
| 52.028 | 0         | 36.994 | 314060000   | 16  | Q3UUU9   |
| 17.024 | 0         | 7.9265 | 239820000   | 16  | Q9JJH1   |
| 49.816 | 0         | 238.26 | 5247100000  | 194 | Q91VI7   |
| 72.415 | 0         | 50.559 | 1009500000  | 46  | Q8VCT3   |
| 158.04 | 0         | 64.51  | 2562600000  | 110 | P70335-2 |
| 160.58 | 0         | 38.843 | 442050000   | 43  | P70336   |
| 29.718 | 0.0035377 | 2.0748 | 87679000    | 3   | Q62193   |
| 24.945 | 0         | 10.716 | 161680000   | 1   | Q8VEE0   |
| 24.604 | 0         | 57.628 | 2457500000  | 73  | Q6ZWW3   |
| 24.916 | 0         | 34.403 | 2336800000  | 68  | P53026   |
| 20.252 | 0         | 14.959 | 505040000   | 16  | Q9CXW4   |
| 17.804 | 0         | 67.3   | 2161700000  | 55  | P35979   |
| 24.305 | 0         | 40.299 | 4054300000  | 100 | P47963   |
| 23.464 | 0         | 3.7612 | 953420000   | 25  | P19253   |
| 23.564 | 0         | 20.086 | 2125900000  | 66  | Q9CR57   |
| 24.146 | 0         | 27.33  | 2055300000  | 94  | Q9CZM2   |
| 21.423 | 0         | 42.788 | 2911100000  | 62  | Q9CPR4   |
| 21.644 | 0         | 16.341 | 978470000   | 39  | P35980   |
| 20.732 | 0         | 6.3617 | 405920000   | 32  | P62717   |
| 23.466 | 0         | 14.12  | 336650000   | 31  | P84099   |
| 18.562 | 0         | 24.092 | 1049100000  | 21  | O09167   |
| 14.759 | 0         | 35.447 | 935820000   | 33  | P67984   |
| 14.865 | 0         | 13.058 | 1958400000  | 21  | P62830   |
| 17.695 | 0         | 13.913 | 929870000   | 46  | P62751   |
| 17.779 | 0         | 14.413 | 2313500000  | 79  | Q8BP67   |
| 17.258 | 0         | 4.8057 | 802320000   | 19  | P61255   |
| 15.798 | 0         | 7.3562 | 681680000   | 30  | P61358   |
| 16.605 | 0         | 15.655 | 1967000000  | 49  | P14115   |
| 15.733 | 0         | 4.8082 | 513950000   | 3   | P41105   |
| 17.587 | 0.0023923 | 2.2887 | 350640000   | 18  | P47915   |
| 46.109 | 0         | 46.167 | 2822000000  | 105 | P27659   |
| 12.784 | 0         | 21.046 | 455030000   | 17  | P62889   |

|        |            |        |            |     |          |
|--------|------------|--------|------------|-----|----------|
| 14.463 | 0          | 3.8687 | 1732000000 | 16  | P62900   |
| 15.86  | 0          | 16.067 | 1173800000 | 52  | P62911   |
| 13.293 | 0          | 3.7996 | 643970000  | 9   | Q9D1R9   |
| 14.552 | 0          | 7.7336 | 429360000  | 16  | Q6ZWW7   |
| 12.554 | 0.00082474 | 2.731  | 510270000  | 27  | O55142   |
| 12.215 | 0          | 4.9944 | 700870000  | 17  | P47964   |
| 10.275 | 0          | 9.9858 | 296240000  | 2   | P61514   |
| 8.2038 | 0          | 9.969  | 353410000  | 34  | Q9JJI8   |
| 6.4066 | 0          | 8.0745 | 871390000  | 25  | P62892   |
| 47.153 | 0          | 93.495 | 9596700000 | 250 | Q9D8E6   |
| 34.4   | 0          | 28.036 | 1980000000 | 64  | P47962   |
| 33.509 | 0          | 26.006 | 2460500000 | 111 | P47911   |
| 31.419 | 0          | 34.89  | 2752600000 | 130 | P14148   |
| 29.976 | 0          | 50.112 | 3394900000 | 140 | P12970   |
| 28.024 | 0          | 55.2   | 2025800000 | 33  | P62918   |
| 21.881 | 0          | 22.577 | 719730000  | 32  | P51410   |
| 34.216 | 0          | 82.425 | 4088400000 | 130 | P14869   |
| 11.475 | 0          | 145.93 | 5992100000 | 77  | P47955   |
| 11.651 | 0          | 93.172 | 4188600000 | 105 | P99027   |
| 68.527 | 0          | 148.9  | 4756000000 | 202 | Q91YQ5   |
| 69.062 | 0          | 298.1  | 5500700000 | 104 | Q9DBG6   |
| 18.916 | 0          | 23.217 | 1270800000 | 51  | P63325   |
| 18.431 | 0          | 7.3852 | 830790000  | 40  | P62281   |
| 14.525 | 0          | 46.167 | 1375000000 | 97  | P63323   |
| 17.222 | 0          | 39.573 | 4490500000 | 152 | P62301   |
| 16.273 | 0          | 23.736 | 688180000  | 26  | P62264   |
| 17.04  | 0          | 188.5  | 2560500000 | 86  | P62843   |
| 14.839 | 0          | 32.863 | 1783000000 | 56  | P62245   |
| 16.445 | 0          | 4.5911 | 233690000  | 3   | P14131   |
| 15.524 | 0          | 99.042 | 2397600000 | 36  | P63276   |
| 17.718 | 0          | 13.409 | 2810300000 | 51  | P62270   |
| 16.085 | 0          | 17.435 | 3117900000 | 54  | Q9CZX8   |
| 31.231 | 0          | 27.781 | 1947000000 | 85  | P25444   |
| 13.373 | 0          | 8.2635 | 887950000  | 49  | P60867   |
| 9.1413 | 0          | 6.0343 | 230530000  | 1   | Q9CQR2   |
| 15.807 | 0          | 7.0097 | 500240000  | 27  | P62267   |
| 15.069 | 0          | 14.301 | 729310000  | 42  | P62849-2 |
| 13.742 | 0          | 11.438 | 1107700000 | 40  | P62852   |
| 13.015 | 0          | 13.773 | 658870000  | 41  | P62855   |
| 17.951 | 0          | 61.399 | 6612600000 | 54  | P62983   |
| 9.4771 | 0          | 6.3668 | 3198300000 | 21  | Q6ZWY3   |

|        |            |        |             |     |          |
|--------|------------|--------|-------------|-----|----------|
| 7.8409 | 0.006379   | 1.5744 | 205490000   | 1   | P62858   |
| 6.6767 | 0          | 7.0277 | 384140000   | 14  | P62274   |
| 26.674 | 0          | 25.646 | 1703400000  | 72  | P62908   |
| 29.885 | 0          | 29.191 | 4152900000  | 139 | P97351   |
| 29.597 | 0          | 45.992 | 3749500000  | 158 | P62702   |
| 22.889 | 0          | 48.31  | 1808700000  | 78  | P97461   |
| 28.68  | 0          | 15.941 | 660160000   | 14  | P62754   |
| 83.693 | 0.0070764  | 1.5306 | 104500000   | 12  | P18654   |
| 22.127 | 0          | 37.959 | 1681200000  | 84  | P62082   |
| 24.205 | 0          | 72.018 | 3362800000  | 75  | P62242   |
| 22.591 | 0          | 24.401 | 2944800000  | 75  | Q6ZWN5   |
| 32.838 | 0          | 201.05 | 7070500000  | 169 | P14206   |
| 33.566 | 0.00042481 | 3.0487 | 27657000    | 5   | Q8K4Q0-3 |
| 33.279 | 0.0064199  | 1.6368 | 188430000   | 16  | O88667   |
| 23.764 | 0          | 76.964 | 4990300000  | 107 | P10833   |
| 172.88 | 0          | 160.18 | 3774400000  | 126 | Q99PL5   |
| 31.55  | 0          | 221.06 | 30402000000 | 393 | Q01730   |
| 39.254 | 0          | 6.5236 | 138440000   | 17  | Q9D7H3   |
| 55.249 | 0          | 25.566 | 1224600000  | 50  | Q99LF4   |
| 83.571 | 0.006739   | 1.565  | 341640000   | 13  | Q8K0T0   |
| 22.239 | 0          | 3.8465 | 153350000   | 3   | O70622-2 |
| 25.428 | 0          | 20.679 | 1151700000  | 13  | Q9ES97-3 |
| 126.61 | 0          | 6.3483 | 90428000    | 6   | Q99P72   |
| 38.403 | 0          | 64.614 | 3119400000  | 93  | Q99P72-5 |
| 28.152 | 0          | 68.98  | 940030000   | 69  | Q9CQE8   |
| 80.376 | 0.0070396  | 1.4927 | 116860000   | 1   | Q8BIJ7   |
| 50.213 | 0          | 24.529 | 478490000   | 40  | P60122   |
| 565.03 | 0.0084404  | 1.4106 | 210970000   | 1   | E9PZQ0   |
| 10.505 | 0          | 6.8091 | 112510000   | 10  | P56565   |
| 11.186 | 0          | 64.184 | 8378300000  | 112 | P08207   |
| 11.083 | 0          | 285.76 | 18640000000 | 119 | P50543   |
| 11.158 | 0          | 8.0499 | 218690000   | 8   | P97352   |
| 11.747 | 0          | 10.581 | 354160000   | 12  | P62818   |
| 11.721 | 0          | 46.715 | 74807000000 | 97  | P07091   |
| 10.812 | 0.0067466  | 1.569  | 431970000   | 10  | P63084   |
| 10.051 | 0          | 35.914 | 4202900000  | 46  | P14069   |
| 48.234 | 0.00041982 | 2.9188 | 77391000    | 1   | Q9D2C2-2 |
| 66.943 | 0          | 37.575 | 465120000   | 28  | Q9EP69   |
| 38.62  | 0          | 18.452 | 832240000   | 43  | Q9R1T2   |
| 111.84 | 0          | 3.6972 | 346340000   | 16  | Q80YR5   |
| 74.934 | 0          | 74.305 | 1919900000  | 68  | Q60710-2 |

|        |            |        |            |     |          |
|--------|------------|--------|------------|-----|----------|
| 51.863 | 0          | 27.204 | 875510000  | 41  | Q8BGH2   |
| 22.371 | 0          | 25.065 | 1045500000 | 59  | P36536   |
| 22.382 | 0          | 5.0502 | 190880000  | 7   | Q9CQC9   |
| 58.388 | 0          | 35.603 | 1028400000 | 62  | P26638   |
| 38.028 | 0          | 5.8412 | 166240000  | 5   | Q8K021   |
| 30.191 | 0          | 19.252 | 179630000  | 5   | Q8K299-3 |
| 54.043 | 0          | 34.232 | 359770000  | 21  | O35114   |
| 47.129 | 0          | 28.002 | 392620000  | 27  | Q8R127   |
| 72.322 | 0          | 21.815 | 842090000  | 32  | Q8BRF7   |
| 9.2833 | 0          | 13.02  | 235690000  | 14  | Q78YZ6-3 |
| 15.236 | 0          | 17.319 | 687190000  | 41  | P32020-2 |
| 50.964 | 0          | 8.4169 | 191360000  | 17  | Q920A5   |
| 46.325 | 0.0031546  | 2.1289 | 366420000  | 21  | Q9CZC8   |
| 46.6   | 0          | 5.5592 | 181350000  | 3   | Q8VCA8   |
| 108.98 | 0          | 21.56  | 1392800000 | 38  | Q66PY1   |
| 72.585 | 0          | 308.82 | 7536000000 | 151 | Q8K2B3   |
| 31.814 | 0          | 39.304 | 2712000000 | 105 | Q9CQA3   |
| 18.382 | 0          | 9.5022 | 761710000  | 38  | Q9CZB0   |
| 17.014 | 0          | 7.7867 | 304960000  | 15  | Q9CXV1   |
| 46.763 | 0          | 39.846 | 3535400000 | 96  | Q63918   |
| 20.626 | 0          | 9.7257 | 205390000  | 17  | Q9R0P6   |
| 35.565 | 0          | 36.407 | 480990000  | 9   | Q9D1M0   |
| 24.74  | 0          | 11.908 | 1045800000 | 60  | O08547   |
| 86.161 | 0          | 79.983 | 2429200000 | 137 | Q01405   |
| 86.436 | 0.00043668 | 3.3559 | 70927000   | 12  | Q9D662   |
| 110.78 | 0          | 10.088 | 240940000  | 10  | Q6NZC7   |
| 129.56 | 0          | 142.51 | 3571800000 | 162 | Q3UPL0-2 |
| 108.64 | 0.0070606  | 1.5086 | 1118200000 | 20  | Q3TZ89-2 |
| 52.264 | 0          | 27.798 | 659370000  | 30  | P61620   |
| 52.513 | 0          | 170.82 | 7430700000 | 209 | P17563   |
| 16.377 | 0          | 3.8379 | 98612000   | 4   | Q8VHC3   |
| 74.22  | 0          | 11.774 | 297910000  | 1   | Q9DBC0   |
| 22.292 | 0.00041667 | 2.8272 | 52352000   | 3   | P62342   |
| 42.906 | 0.00041719 | 2.8416 | 133930000  | 4   | Q8BH69   |
| 42.705 | 0          | 3.6083 | 139190000  | 15  | P70274   |
| 48.964 | 0          | 13.918 | 74399000   | 5   | Q8C1B7-3 |
| 41.525 | 0          | 198.24 | 6243900000 | 142 | P42208   |
| 42.747 | 0          | 52.908 | 1041000000 | 38  | Q9Z2Q6   |
| 48.763 | 0          | 39.317 | 730830000  | 38  | Q9R1T4-2 |
| 50.549 | 0          | 117.08 | 5875500000 | 103 | O55131   |
| 49.812 | 0          | 28.634 | 1489200000 | 21  | Q8CHH9   |

|        |            |        |             |     |          |
|--------|------------|--------|-------------|-----|----------|
| 64.774 | 0          | 72.02  | 3523600000  | 148 | Q80UG5-3 |
| 25.678 | 0          | 20.417 | 380230000   | 12  | Q9CY58-4 |
| 46.002 | 0          | 19.696 | 1024500000  | 29  | P07758   |
| 45.974 | 0          | 46.437 | 3948800000  | 54  | P22599   |
| 45.823 | 0          | 323.31 | 39329000000 | 416 | Q00896   |
| 45.998 | 0          | 95.703 | 3618000000  | 106 | Q00897   |
| 45.891 | 0          | 115.4  | 3686800000  | 101 | Q00898   |
| 46.879 | 0          | 206.65 | 7868300000  | 145 | P07759   |
| 47.064 | 0          | 22.699 | 10930000000 | 33  | Q03734   |
| 46.717 | 0          | 17.778 | 305380000   | 16  | Q91WP6   |
| 44.769 | 0.0020032  | 2.333  | 23723000    | 3   | Q06770   |
| 42.574 | 0          | 3.7487 | 118670000   | 7   | Q9D154   |
| 42.598 | 0          | 131.48 | 7647000000  | 207 | Q60854   |
| 52.003 | 0          | 183.8  | 15143000000 | 265 | P32261   |
| 54.496 | 0          | 16.265 | 733380000   | 32  | P49182   |
| 44.207 | 0          | 140.12 | 9034100000  | 288 | Q07235   |
| 46.233 | 0          | 83.502 | 2765300000  | 56  | P97298   |
| 54.971 | 0.0070685  | 1.5193 | 91158000    | 17  | Q61247   |
| 55.584 | 0          | 52.813 | 610330000   | 56  | P97290   |
| 46.533 | 0          | 278.66 | 32669000000 | 337 | P19324   |
| 32.105 | 0          | 22.02  | 520890000   | 23  | Q9EQU5-2 |
| 40.506 | 0          | 9.0585 | 63656000    | 5   | Q8VHL1   |
| 59.656 | 0          | 26.188 | 561520000   | 40  | Q64213-2 |
| 88.544 | 0          | 6.0925 | 178000000   | 7   | Q8K4Z5   |
| 49.911 | 0          | 8.7399 | 50571000    | 6   | Q62203   |
| 145.81 | 0          | 13.297 | 422500000   | 21  | Q99NB9   |
| 125.31 | 0          | 16.023 | 195280000   | 11  | Q921M3-2 |
| 44.355 | 0.0035184  | 2.0117 | 228250000   | 13  | Q8QZY9   |
| 27.706 | 0.0027712  | 2.2145 | 1057300000  | 11  | O70456   |
| 75.441 | 0          | 45.703 | 1611700000  | 110 | Q8VIJ6   |
| 35.412 | 0          | 30.464 | 1131800000  | 29  | Q8C4U3   |
| 35.649 | 0          | 32.112 | 572570000   | 19  | Q99JR1   |
| 35.406 | 0          | 191.71 | 8386800000  | 211 | Q91V61   |
| 43.286 | 0          | 27.709 | 878410000   | 22  | P82350   |
| 34.872 | 0          | 56.658 | 923140000   | 28  | P82349   |
| 32.133 | 0          | 21.519 | 1657800000  | 55  | P82347   |
| 49.735 | 0          | 111.19 | 3595500000  | 66  | O70258   |
| 32.081 | 0          | 16.777 | 293120000   | 10  | P82348   |
| 63.676 | 0.00041684 | 2.8313 | 85075000    | 9   | Q8R0X7   |
| 34.194 | 0          | 7.6222 | 2809100000  | 13  | Q8BJU0-2 |
| 12.811 | 0          | 99.986 | 5848400000  | 111 | Q9JJU8   |

|        |            |        |             |     |          |
|--------|------------|--------|-------------|-----|----------|
| 10.477 | 0          | 31.498 | 969570000   | 12  | Q91VW3   |
| 60.323 | 0.0042455  | 1.8428 | 13571000000 | 29  | Q7TSG5   |
| 41.518 | 0.0004329  | 3.2536 | 201580000   | 5   | Q62419   |
| 40.855 | 0          | 18.863 | 478970000   | 14  | Q9JK48   |
| 42.197 | 0          | 21.084 | 540850000   | 11  | Q8R3V5-3 |
| 119.03 | 0.0023857  | 2.2534 | 230040000   | 12  | O89032-3 |
| 55.42  | 0          | 17.072 | 337830000   | 25  | Q9CZN7-2 |
| 72.512 | 0.0070501  | 1.4974 | 370330000   | 16  | Q61079   |
| 26.518 | 0          | 8.8036 | 34856000    | 2   | Q8VDQ8-3 |
| 117.64 | 0          | 3.946  | 233740000   | 7   | Q9CZU3   |
| 18.672 | 0          | 24.472 | 1136200000  | 20  | Q9WTX5   |
| 127.53 | 0.0004207  | 2.9341 | 125800000   | 3   | Q924N4   |
| 58.482 | 0          | 13.881 | 152480000   | 6   | P51912   |
| 33.931 | 0          | 44.857 | 1843300000  | 84  | Q8JZU2   |
| 31.715 | 0          | 35.607 | 205630000   | 15  | Q9QZD8   |
| 34.155 | 0          | 68.129 | 1347200000  | 66  | Q9CR62   |
| 74.569 | 0          | 77.065 | 2404200000  | 81  | Q8BH59   |
| 33.026 | 0          | 44.97  | 992750000   | 33  | Q9Z2Z6   |
| 52.901 | 0          | 20.795 | 786520000   | 44  | Q8BMD8   |
| 39.632 | 0          | 45.171 | 4549300000  | 136 | Q8VEM8   |
| 32.904 | 0          | 305.74 | 34535000000 | 421 | P48962   |
| 35.24  | 0          | 5.0664 | 140890000   | 14  | Q8R0Y8   |
| 32.931 | 0          | 64.147 | 5987200000  | 102 | P51881   |
| 33.689 | 0          | 47.714 | 128990000   | 5   | Q5HZI9   |
| 71.275 | 0.0053496  | 1.7262 | 86426000    | 15  | Q60714   |
| 50.076 | 0.00042141 | 2.9601 | 46048000    | 15  | Q9JIM1-2 |
| 53.984 | 0          | 6.2635 | 33188000    | 4   | P17809   |
| 58.336 | 0          | 5.6434 | 166460000   | 8   | P10852   |
| 79.923 | 0          | 15.588 | 644820000   | 21  | Q8BY89-2 |
| 94.233 | 0          | 323.31 | 11007000000 | 210 | P04919-2 |
| 116.51 | 0          | 4.2163 | 285510000   | 7   | Q8BTY2   |
| 167.73 | 0          | 8.8323 | 324930000   | 26  | Q9WVB4   |
| 41.864 | 0          | 111.19 | 7385800000  | 145 | Q3URD3-4 |
| 180.25 | 0          | 4.1103 | 202380000   | 2   | Q6DICO   |
| 121.63 | 0          | 10.329 | 295630000   | 16  | Q91ZW3   |
| 121.37 | 0          | 28.224 | 260250000   | 17  | Q6PDG5-2 |
| 143.23 | 0          | 9.4516 | 209340000   | 25  | Q9CU62   |
| 141.55 | 0          | 4.6093 | 28922000    | 8   | Q9CW03   |
| 11.542 | 0.00041632 | 2.8208 | 55728000    | 2   | Q9DB10   |
| 49.763 | 0          | 68.99  | 2200600000  | 79  | Q8BLY1-2 |
| 89.876 | 0          | 17.196 | 106270000   | 15  | Q6ZPR5-3 |

|        |            |        |             |     |          |
|--------|------------|--------|-------------|-----|----------|
| 49.857 | 0.00042319 | 2.9956 | 68481000    | 2   | P70158   |
| 51.599 | 0          | 3.445  | 54352000    | 15  | P58242   |
| 100.29 | 0          | 323.31 | 27849000000 | 449 | Q921U8   |
| 37.548 | 0          | 5.7266 | 239090000   | 23  | Q3UKJ7-2 |
| 13.159 | 0          | 24.667 | 561030000   | 14  | Q9Z0F7   |
| 102.09 | 0          | 83.157 | 2494500000  | 88  | Q78PY7   |
| 244.54 | 0          | 82.827 | 742930000   | 43  | Q6P4T2   |
| 19.79  | 0          | 7.9322 | 500640000   | 20  | Q62376-2 |
| 31.835 | 0          | 11.91  | 315330000   | 15  | Q62189   |
| 23.656 | 0          | 5.3473 | 616570000   | 39  | P27048   |
| 25.323 | 0          | 22.202 | 286550000   | 12  | Q9CQI7   |
| 13.281 | 0          | 11.439 | 1087700000  | 16  | P62315   |
| 13.916 | 0          | 5.4933 | 335840000   | 29  | P62320   |
| 10.803 | 0          | 6.5466 | 747840000   | 17  | P62305   |
| 9.7251 | 0          | 8.3614 | 349870000   | 18  | P62307   |
| 8.496  | 0.0038835  | 1.9336 | 225920000   | 12  | P62309   |
| 53.664 | 0          | 54.911 | 851360000   | 20  | Q61234   |
| 58.081 | 0          | 69.845 | 2514600000  | 117 | Q99L88   |
| 56.381 | 0          | 33.157 | 2413500000  | 102 | Q61235   |
| 58.951 | 0          | 16.062 | 773790000   | 11  | Q9WV80   |
| 19.116 | 0.0016234  | 2.5217 | 289760000   | 34  | O70493   |
| 52.797 | 0          | 4.1111 | 91504000    | 1   | Q8BVL3   |
| 67.903 | 0          | 45.613 | 1939600000  | 89  | Q91ZR2   |
| 58.47  | 0          | 34.054 | 426470000   | 9   | Q9CWK8   |
| 18.757 | 0          | 4.2815 | 475090000   | 19  | O70492   |
| 51.777 | 0          | 6.9992 | 50704000    | 10  | Q91YJ2   |
| 46.797 | 0          | 11.563 | 208560000   | 21  | Q9D8U8   |
| 46.648 | 0.0070843  | 1.5376 | 173130000   | 2   | Q6P8X1   |
| 66.545 | 0          | 27.499 | 560610000   | 40  | Q91VH2   |
| 15.942 | 0          | 21.586 | 12157000000 | 62  | P08228   |
| 24.603 | 0          | 158.93 | 5253200000  | 111 | P09671   |
| 27.392 | 0          | 230.38 | 32378000000 | 348 | O09164   |
| 82.86  | 0          | 106.18 | 4091600000  | 144 | Q62417-2 |
| 69.476 | 0          | 170.68 | 7595900000  | 185 | Q3UTJ2-4 |
| 82.348 | 0          | 24.397 | 1319700000  | 33  | Q9R1Z8   |
| 38.249 | 0          | 7.1171 | 349600000   | 29  | Q64442   |
| 23.501 | 0          | 29.108 | 4312000000  | 99  | Q99P68   |
| 125.35 | 0          | 4.3428 | 88221000    | 9   | Q58A65-6 |
| 34.45  | 0          | 77.193 | 1493800000  | 55  | P07214   |
| 72.286 | 0          | 6.6255 | 153820000   | 4   | P70663   |
| 24.977 | 0          | 4.9719 | 122270000   | 4   | Q9CYN2   |



|        |            |        |             |     |          |
|--------|------------|--------|-------------|-----|----------|
| 90.82  | 0          | 12.382 | 608570000   | 13  | Q8VCC9   |
| 27.883 | 0          | 59.208 | 3732200000  | 57  | Q64105   |
| 279.86 | 0          | 289.85 | 3680600000  | 173 | P08032   |
| 282.34 | 0          | 323.31 | 23995000000 | 904 | P16546-2 |
| 245.25 | 0          | 250.88 | 3092800000  | 106 | P15508   |
| 274.22 | 0          | 323.31 | 23630000000 | 762 | Q62261   |
| 50.282 | 0          | 38.265 | 933560000   | 62  | Q9R112   |
| 20.296 | 0          | 60.702 | 1869900000  | 95  | Q6P069-2 |
| 33.995 | 0          | 7.0426 | 586630000   | 10  | Q64674   |
| 12.51  | 0          | 7.0909 | 92351000    | 1   | P16254   |
| 55.72  | 0          | 17.872 | 215870000   | 25  | P14576   |
| 69.622 | 0          | 11.872 | 104280000   | 3   | Q9DBG7   |
| 42.097 | 0          | 21.824 | 446190000   | 26  | Q9R0M3-2 |
| 101.1  | 0          | 4.0408 | 144830000   | 12  | Q52KI8-2 |
| 99.438 | 0          | 4.0547 | 478350000   | 7   | Q99MR6-3 |
| 21.807 | 0          | 9.5416 | 296450000   | 10  | Q6PDM2-3 |
| 22.222 | 0          | 10.973 | 259100000   | 19  | Q9R0U0-3 |
| 25.476 | 0          | 18.372 | 451560000   | 18  | Q62093   |
| 14.203 | 0          | 10.881 | 1056600000  | 22  | P84104-2 |
| 39.025 | 0.00043706 | 3.3701 | 539100000   | 15  | Q3TWW8   |
| 17.89  | 0          | 7.6676 | 285330000   | 16  | Q8BL97-3 |
| 47.756 | 0          | 38.138 | 1099100000  | 46  | P32067   |
| 17.319 | 0          | 18.865 | 171580000   | 11  | Q9CYR0   |
| 23.858 | 0.0035019  | 1.95   | 87485000    | 14  | Q62147   |
| 32.065 | 0          | 7.0147 | 626190000   | 16  | Q9CY50   |
| 18.936 | 0          | 7.7465 | 148340000   | 9   | Q62186   |
| 41.655 | 0          | 26.187 | 1846900000  | 57  | Q99L47   |
| 46.127 | 0.0084497  | 1.4186 | 158810000   | 8   | O88829-2 |
| 83.125 | 0          | 42.285 | 771100000   | 23  | P42227-2 |
| 54.748 | 0          | 8.6692 | 228570000   | 10  | Q8CI59   |
| 77.566 | 0          | 12.063 | 276480000   | 28  | P70302   |
| 62.581 | 0          | 116.56 | 4170300000  | 144 | Q60864   |
| 47.953 | 0          | 55.893 | 1332500000  | 71  | Q99KH8   |
| 60.319 | 0          | 12.253 | 84227000    | 3   | Q9Z1W9   |
| 31.375 | 0          | 47.422 | 2388800000  | 65  | P54116   |
| 38.384 | 0          | 23.292 | 539110000   | 14  | Q99JB2   |
| 81.792 | 0          | 17.097 | 35800000    | 4   | Q8CDJ8   |
| 38.442 | 0.0067315  | 1.5511 | 110560000   | 9   | Q9Z1Z2   |
| 66.59  | 0          | 18.78  | 251810000   | 9   | P50427   |
| 80.597 | 0.0067139  | 1.5394 | 67360000    | 7   | P46978   |
| 93.245 | 0          | 9.44   | 183130000   | 17  | Q3TDQ1   |

|        |           |        |             |      |          |
|--------|-----------|--------|-------------|------|----------|
| 31.195 | 0         | 47.201 | 513590000   | 20   | Q9ER00   |
| 37.08  | 0         | 53.675 | 217650000   | 7    | Q8BVI5   |
| 29.82  | 0         | 6.5567 | 157170000   | 11   | O70439   |
| 67.568 | 0         | 13.978 | 811090000   | 50   | O08599   |
| 61.678 | 0         | 37.548 | 1283500000  | 64   | Q60770-2 |
| 50.113 | 0         | 91.286 | 3229300000  | 106  | Q9Z2I9   |
| 36.154 | 0         | 117.96 | 6668000000  | 144  | Q9WUM5   |
| 41.349 | 0         | 37.15  | 1270500000  | 73   | Q9Z2I8-2 |
| 38.158 | 0         | 8.3715 | 172310000   | 11   | Q9CX34   |
| 100.92 | 0.0031533 | 2.1215 | 118630000   | 1    | Q8K007   |
| 84.67  | 0         | 12.161 | 332400000   | 14   | Q9D666-5 |
| 78.178 | 0         | 93.867 | 2615700000  | 102  | Q8BJS4-3 |
| 60.755 | 0         | 12.009 | 115450000   | 1    | Q8R086   |
| 30.381 | 0         | 39.535 | 340300000   | 36   | Q64310   |
| 90.641 | 0         | 55.416 | 2715400000  | 102  | Q9DBX3   |
| 243.16 | 0         | 28.752 | 523750000   | 30   | Q8K4L3   |
| 42.23  | 0         | 6.6962 | 72747000    | 3    | Q9EPM5-3 |
| 62.672 | 0         | 29.325 | 1419900000  | 71   | Q7TMK9-2 |
| 1009.7 | 0         | 98.491 | 854580000   | 54   | Q6ZWR6-4 |
| 782.72 | 0         | 5.7768 | 293790000   | 5    | Q6ZWQ0   |
| 140.87 | 0         | 4.2882 | 242340000   | 12   | Q70IV5-2 |
| 96.249 | 0         | 48.095 | 1594500000  | 99   | Q8CC35-2 |
| 116.53 | 0         | 323.31 | 16928000000 | 328  | Q91YE8   |
| 22.576 | 0         | 323.31 | 3.8534E+11  | 1331 | P37804   |
| 22.395 | 0         | 323.31 | 2.4244E+11  | 860  | Q9WVA4   |
| 22.47  | 0.0020024 | 2.3317 | 1413100000  | 10   | Q9R1Q8   |
| 37.387 | 0         | 28.413 | 2503200000  | 91   | Q93092   |
| 46.62  | 0         | 17.331 | 607180000   | 14   | Q9R233-2 |
| 44.547 | 0         | 27.665 | 1578600000  | 57   | Q921F2   |
| 83.355 | 0         | 16.811 | 532190000   | 32   | Q9D0R2   |
| 132.01 | 0         | 8.8923 | 57030000    | 8    | Q60949-2 |
| 133.32 | 0         | 7.2747 | 79122000    | 9    | Q8BYA0   |
| 33.88  | 0         | 4.9917 | 167480000   | 11   | P10711   |
| 12.473 | 0         | 5.4259 | 411140000   | 35   | P83940   |
| 13.17  | 0         | 32.377 | 1207000000  | 36   | P62869   |
| 47.585 | 0         | 4.5338 | 53498000    | 4    | O88968   |
| 60.448 | 0         | 120.91 | 4335500000  | 146  | P11983   |
| 41.772 | 0         | 65.661 | 4441600000  | 98   | P47226-2 |
| 76.723 | 0         | 323.31 | 31420000000 | 499  | Q921I1   |
| 50.1   | 0         | 323.31 | 50878000000 | 592  | Q62219   |
| 74.596 | 0         | 323.31 | 17133000000 | 339  | P82198   |

|        |            |        |             |      |          |
|--------|------------|--------|-------------|------|----------|
| 77.06  | 0          | 323.31 | 34021000000 | 554  | P21981   |
| 55.992 | 0          | 7.8645 | 57203000    | 6    | P24529   |
| 129.65 | 0          | 85.168 | 2857300000  | 100  | P35441   |
| 113.24 | 0          | 49.521 | 3050700000  | 131  | Q3UTY6   |
| 38.884 | 0          | 4.5401 | 128260000   | 9    | Q99J36   |
| 18.08  | 0          | 34.034 | 1407500000  | 26   | P01831   |
| 10.458 | 0          | 14.926 | 834670000   | 8    | P62075   |
| 51.091 | 0          | 10.883 | 144860000   | 14   | O35857   |
| 39.776 | 0.0094891  | 1.3698 | 83882000    | 16   | Q9D880   |
| 24.182 | 0          | 18.336 | 305110000   | 16   | P39876   |
| 52.664 | 0          | 323.31 | 24251000000 | 367  | Q99JR5   |
| 194.74 | 0          | 8.9206 | 475980000   | 18   | P39447   |
| 67.63  | 0          | 323.31 | 29674000000 | 523  | P40142   |
| 269.82 | 0          | 323.31 | 2.5261E+11  | 2582 | P26039   |
| 253.62 | 0          | 48.32  | 683910000   | 39   | Q71LX4   |
| 21.175 | 0          | 8.2538 | 111210000   | 14   | Q921L3   |
| 24.911 | 0          | 21.41  | 1346100000  | 43   | Q9D1D4   |
| 22.705 | 0          | 16.957 | 900230000   | 49   | Q9R0Q3   |
| 27.127 | 0          | 14.94  | 261980000   | 18   | Q99KF1   |
| 11.642 | 0.0057099  | 1.6934 | 308160000   | 2    | Q9CQN6   |
| 6.775  | 0.0042357  | 1.8213 | 41614000    | 6    | Q9CR64-2 |
| 11.655 | 0          | 12.366 | 224200000   | 8    | Q5F285   |
| 44.783 | 0          | 174.19 | 4736800000  | 144  | Q9DBS1   |
| 40.466 | 0          | 6.9576 | 106830000   | 2    | P49813   |
| 39.502 | 0          | 78.161 | 1281000000  | 46   | Q9JHJ0   |
| 42.65  | 0          | 82.95  | 3707000000  | 103  | Q61029-2 |
| 75.167 | 0          | 7.4938 | 276790000   | 16   | Q61033   |
| 5.0256 | 0          | 3.5393 | 85570000    | 4    | Q6ZWY8   |
| 5.0526 | 0          | 52.644 | 4761400000  | 121  | P20065-2 |
| 104.2  | 0          | 6.2859 | 100380000   | 11   | Q8BRH0   |
| 31.395 | 0.00041771 | 2.8466 | 322780000   | 13   | Q8VBT0   |
| 33.942 | 0          | 4.4741 | 38486000    | 3    | Q9D710   |
| 37.131 | 0.0016162  | 2.4662 | 82245000    | 12   | Q8C0L0   |
| 221.88 | 0          | 136.05 | 1704000000  | 37   | Q80YX1-2 |
| 22.96  | 0          | 5.497  | 55017000    | 6    | Q921Z5   |
| 101.31 | 0          | 27.135 | 866470000   | 54   | Q8BFY9-2 |
| 100.46 | 0          | 4.7209 | 148460000   | 2    | Q99LG2   |
| 104.17 | 0          | 21.196 | 449840000   | 26   | Q6P2B1   |
| 149.5  | 0          | 93.948 | 3748400000  | 152  | Q8CGB6-2 |
| 54.325 | 0          | 13.685 | 162560000   | 11   | O88746   |
| 48.407 | 0          | 21.785 | 479910000   | 23   | Q5SRX1-3 |

|        |            |        |             |     |          |
|--------|------------|--------|-------------|-----|----------|
| 15.537 | 0          | 10.498 | 255300000   | 15  | Q9CPQ3   |
| 34.28  | 0.00042017 | 2.9239 | 183420000   | 4   | Q9CYG7-2 |
| 5.1161 | 0.0020072  | 2.3784 | 89647000    | 14  | B1AXP6-2 |
| 67.589 | 0          | 19.511 | 535880000   | 29  | Q9CZW5   |
| 172.79 | 0          | 4.4088 | 2700900000  | 16  | Q01320   |
| 181.91 | 0          | 23.611 | 515170000   | 31  | Q64511   |
| 58.415 | 0          | 6.9968 | 257130000   | 5   | Q921T2-3 |
| 54.495 | 0.0087751  | 1.3837 | 76808000    | 1   | Q8BYU6   |
| 37.817 | 0          | 3.5574 | 254330000   | 7   | Q9ER41   |
| 43.813 | 0          | 4.4912 | 74761000    | 3   | Q9ER38   |
| 20.059 | 0          | 4.4812 | 44983000    | 3   | Q62393-2 |
| 24.043 | 0          | 20.441 | 1050200000  | 32  | Q9CYZ2   |
| 32.191 | 0          | 142.26 | 20785000000 | 264 | P17751   |
| 32.708 | 0          | 205.77 | 34287000000 | 466 | P58771-2 |
| 29.02  | 0          | 32.482 | 13179000000 | 108 | P21107-2 |
| 28.467 | 0          | 218.78 | 2838000000  | 64  | Q6IRU2   |
| 61.341 | 0          | 106.42 | 984550000   | 21  | O89023   |
| 23.574 | 0          | 3.6956 | 24166000    | 2   | Q7TQD2   |
| 18.965 | 0          | 116.89 | 5532300000  | 136 | Q9CRB6   |
| 273.99 | 0          | 14.939 | 190300000   | 15  | F6ZDS4   |
| 29.814 | 0          | 12.953 | 105620000   | 7   | Q9DBS2   |
| 19.556 | 0          | 4.4361 | 17219000    | 4   | Q8QZZ7   |
| 19.462 | 0          | 42.153 | 3136600000  | 55  | P63028   |
| 80.208 | 0          | 5.1679 | 129910000   | 4   | Q9CQN1   |
| 16.441 | 0.0024     | 2.3206 | 41435000    | 12  | Q9CQP2   |
| 20.302 | 0          | 4.6133 | 175310000   | 19  | O55013   |
| 17.936 | 0          | 29.428 | 210650000   | 15  | Q9D289   |
| 57.136 | 0.00041494 | 2.785  | 72432000    | 4   | Q8BGX0-3 |
| 88.846 | 0          | 59.008 | 1228400000  | 43  | Q62318   |
| 69.912 | 0          | 34.696 | 886570000   | 33  | Q8C0E3   |
| 288.71 | 0          | 4.131  | 105280000   | 1   | Q0KL02-3 |
| 62.566 | 0          | 28.536 | 4983100000  | 40  | Q8CJ53-4 |
| 50.933 | 0          | 30.826 | 1405000000  | 37  | Q9Z1Y4   |
| 14.141 | 0.0035088  | 1.981  | 194350000   | 10  | Q9DCG9   |
| 49.895 | 0          | 12.363 | 141070000   | 13  | Q8K1J6   |
| 26.201 | 0          | 26.421 | 410350000   | 23  | Q62348   |
| 32.926 | 0          | 15.356 | 470620000   | 27  | Q9QZE7   |
| 26.053 | 0          | 21.888 | 180600000   | 10  | Q9DCK3   |
| 26.738 | 0          | 6.5462 | 158480000   | 6   | Q8BJU2   |
| 18.841 | 0          | 105.95 | 1660200000  | 36  | P50637   |
| 33.466 | 0          | 9.5156 | 405600000   | 32  | P52196   |

|        |            |        |             |      |          |
|--------|------------|--------|-------------|------|----------|
| 267.46 | 0          | 3.5214 | 54128000    | 4    | Q80XJ3   |
| 52.223 | 0          | 11.549 | 377110000   | 14   | A3KMP2   |
| 74.042 | 0.00041736 | 2.8442 | 110230000   | 6    | Q3UDE2   |
| 3906.4 | 0          | 64.577 | 1209900000  | 26   | A2ASS6   |
| 15.776 | 0          | 143.17 | 4540400000  | 62   | P07309   |
| 50.135 | 0          | 18.864 | 1836200000  | 47   | P68369   |
| 50.151 | 0          | 323.31 | 90416000000 | 780  | P05213   |
| 49.909 | 0          | 41.359 | 5392100000  | 42   | P68373   |
| 49.924 | 0          | 12.964 | 509080000   | 7    | P68368   |
| 49.953 | 0          | 80.406 | 4299900000  | 84   | Q9CWF2   |
| 50.418 | 0          | 45.348 | 1767000000  | 59   | Q9ERD7   |
| 49.585 | 0          | 44.232 | 317010000   | 12   | Q9D6F9   |
| 49.83  | 0          | 323.31 | 1.4471E+11  | 1258 | P68372   |
| 49.67  | 0          | 141.53 | 13081000000 | 186  | P99024   |
| 50.09  | 0          | 50.313 | 1054100000  | 41   | Q922F4   |
| 49.508 | 0          | 58.67  | 2715100000  | 89   | Q8BFR5   |
| 40.079 | 0          | 4.7589 | 466460000   | 21   | Q91YR1   |
| 39.311 | 0          | 18.501 | 215260000   | 19   | Q9Z0P5-2 |
| 11.675 | 0          | 46.957 | 6932900000  | 116  | P10639   |
| 18.255 | 0          | 5.5928 | 212530000   | 3    | P97493   |
| 14.015 | 0          | 26.347 | 886050000   | 22   | Q9CQM5   |
| 46.415 | 0          | 47.06  | 2389500000  | 114  | Q91W90   |
| 32.237 | 0          | 13.101 | 639390000   | 37   | Q8CDN6   |
| 54.544 | 0          | 26.303 | 861460000   | 42   | Q9JMH6-2 |
| 27.815 | 0          | 8.5657 | 287180000   | 19   | Q9D883   |
| 53.516 | 0          | 13.159 | 532020000   | 24   | P26369   |
| 56.613 | 0          | 15.758 | 441550000   | 44   | Q3TW96   |
| 117.81 | 0          | 323.31 | 19595000000 | 444  | Q02053   |
| 70.568 | 0          | 4.9195 | 273630000   | 9    | Q9Z1F9   |
| 44.325 | 0.0020105  | 2.387  | 112920000   | 11   | Q8C878-2 |
| 44.789 | 0          | 16.936 | 586990000   | 9    | Q8VE47   |
| 107.24 | 0.00082713 | 2.7629 | 113730000   | 15   | Q80X50-2 |
| 16.735 | 0          | 33.054 | 1212100000  | 45   | P62838   |
| 18.007 | 0          | 3.9617 | 209290000   | 8    | P63280   |
| 22.406 | 0          | 5.3236 | 316020000   | 5    | P61087   |
| 17.861 | 0          | 31.769 | 3009700000  | 54   | P68037   |
| 17.138 | 0          | 50.65  | 4297700000  | 78   | P61089   |
| 16.367 | 0          | 6.8114 | 923000000   | 50   | Q9D2M8   |
| 123.97 | 0.0035266  | 2.0428 | 9192400000  | 17   | Q80U95   |
| 118.2  | 0          | 4.4024 | 73242000    | 3    | E9Q735   |
| 133.32 | 0          | 4.2716 | 18848000    | 2    | Q9ES00   |

|        |            |        |             |     |          |
|--------|------------|--------|-------------|-----|----------|
| 8.5468 | 0.0042438  | 1.8412 | 28720000    | 11  | Q9EPV8   |
| 58.677 | 0          | 44.639 | 456480000   | 33  | Q8R317-2 |
| 67.35  | 0.0004223  | 2.9799 | 68278000    | 1   | Q9QZM0   |
| 570.29 | 0          | 15.972 | 382260000   | 15  | A2AN08-3 |
| 33.572 | 0          | 37.792 | 439560000   | 24  | Q922Y1   |
| 43.994 | 0          | 4.3072 | 202680000   | 1   | Q99PL6-2 |
| 24.838 | 0          | 135.05 | 4838800000  | 103 | Q9R0P9   |
| 26.151 | 0          | 5.1249 | 166870000   | 3   | Q9JKB1   |
| 33.247 | 0          | 133.65 | 7665300000  | 136 | P12242   |
| 19.481 | 0          | 10.675 | 1206200000  | 28  | Q9CR09   |
| 34.481 | 0          | 11.804 | 551730000   | 31  | P70362   |
| 9.1175 | 0          | 17.609 | 1017000000  | 24  | P61961   |
| 54.831 | 0          | 23.281 | 649380000   | 24  | O70475   |
| 176.43 | 0          | 85.832 | 2443900000  | 72  | Q6P5E4   |
| 56.979 | 0          | 51.975 | 1256100000  | 54  | Q91ZJ5   |
| 60.007 | 0          | 9.3279 | 69876000    | 8   | Q62452   |
| 52.292 | 0.0045959  | 1.7318 | 35535000    | 1   | P13439   |
| 103.45 | 0          | 144.37 | 3498500000  | 111 | Q99KD5   |
| 122.66 | 0          | 16.815 | 651720000   | 46  | Q9EPU0-2 |
| 7.4454 | 0          | 15.736 | 1168100000  | 19  | Q8R1I1   |
| 6.5386 | 0          | 3.9431 | 1061400000  | 35  | Q9CPX8   |
| 13.527 | 0          | 28.778 | 2250500000  | 44  | Q9D855   |
| 52.851 | 0          | 236.4  | 8741800000  | 195 | Q9CZ13   |
| 48.234 | 0          | 264.83 | 15694000000 | 310 | Q9DB77   |
| 29.367 | 0          | 113.28 | 3846900000  | 104 | Q9CR68   |
| 10.435 | 0          | 43.99  | 761640000   | 17  | P99028   |
| 9.7681 | 0          | 80.737 | 3354600000  | 78  | Q9CQ69   |
| 40.691 | 0          | 14.77  | 148590000   | 16  | P70697   |
| 6.3814 | 0.00043309 | 3.2651 | 49469000    | 4   | Q78IK2   |
| 100.19 | 0          | 24.783 | 540440000   | 19  | Q9Z1Z0-2 |
| 56.001 | 0          | 11.037 | 624230000   | 23  | Q9JMA1   |
| 109.22 | 0          | 4.7716 | 33802000    | 1   | Q8R5H1-5 |
| 102.14 | 0.0035308  | 2.0559 | 1262900000  | 16  | Q8C6M1   |
| 108.34 | 0          | 5.88   | 262170000   | 9   | P35123   |
| 95.832 | 0          | 185.02 | 2850300000  | 120 | P56399   |
| 127.99 | 0          | 7.4873 | 181520000   | 8   | Q6A4J8-3 |
| 290.71 | 0          | 21.036 | 2328900000  | 37  | P70398   |
| 88.047 | 0.0004363  | 3.3443 | 43175000    | 16  | Q80WQ2   |
| 27.855 | 0          | 42.478 | 1134100000  | 55  | Q9WV55   |
| 26.946 | 0          | 8.2551 | 643610000   | 34  | Q9QY76   |
| 140.21 | 0          | 78.856 | 1520600000  | 48  | Q9Z1Q9   |

|        |            |        |             |      |          |
|--------|------------|--------|-------------|------|----------|
| 72.26  | 0          | 13.643 | 157450000   | 12   | Q9CZT5   |
| 39.666 | 0          | 82.623 | 3559000000  | 79   | P70460   |
| 43.096 | 0          | 117.22 | 7339700000  | 185  | Q62465   |
| 45.817 | 0.0094856  | 1.3619 | 21983000    | 1    | Q80TB8   |
| 22.435 | 0          | 21.634 | 249450000   | 17   | P61759   |
| 74.176 | 0          | 138.91 | 7515400000  | 124  | Q62059-4 |
| 116.72 | 0          | 323.31 | 2.2172E+11  | 1671 | Q64727   |
| 89.321 | 0          | 323.31 | 18044000000 | 559  | Q01853   |
| 30.755 | 0          | 82.719 | 9663400000  | 165  | Q60932-2 |
| 31.732 | 0          | 44.275 | 4284400000  | 103  | Q60930   |
| 30.752 | 0          | 20.006 | 984960000   | 41   | Q60931   |
| 53.687 | 0          | 323.31 | 5.8226E+11  | 2322 | P20152   |
| 17.768 | 0          | 9.7368 | 173980000   | 13   | Q9CRC0   |
| 19.778 | 0          | 3.5183 | 63237000    | 12   | Q6TEK5   |
| 17.488 | 0          | 17.438 | 547530000   | 39   | Q9CQ80-2 |
| 39.124 | 0          | 6.0696 | 153630000   | 11   | Q8C0E2   |
| 25.452 | 0          | 9.2219 | 163380000   | 7    | Q9D1C8   |
| 20.495 | 0          | 29.81  | 1138400000  | 40   | Q9QZ88   |
| 91.712 | 0          | 135.31 | 3169200000  | 164  | Q9EQH3   |
| 48.439 | 0.0016116  | 2.4304 | 24020000    | 6    | Q8BWQ6-2 |
| 43.735 | 0.00042626 | 3.1031 | 172700000   | 8    | Q91XD6   |
| 65.052 | 0.0035047  | 1.9686 | 46048000    | 1    | P97390   |
| 48.906 | 0.00082508 | 2.7324 | 69868000    | 1    | Q8VEJ9   |
| 49.419 | 0          | 22.941 | 972760000   | 46   | P46467   |
| 33.913 | 0.00042301 | 2.9929 | 120710000   | 13   | Q9CR26   |
| 54.848 | 0          | 37.769 | 1596200000  | 71   | P29788   |
| 44.708 | 0          | 78.127 | 1958000000  | 61   | Q8R2Z5   |
| 87.142 | 0          | 50.787 | 1275400000  | 82   | Q99KC8   |
| 32.459 | 0.0067189  | 1.5433 | 4875200000  | 23   | Q3UR50-5 |
| 213.42 | 0          | 7.335  | 171310000   | 5    | Q8CC88   |
| 309.27 | 0          | 158.37 | 4041900000  | 136  | Q8CIZ8   |
| 53.64  | 0          | 15.661 | 761930000   | 22   | P32921-2 |
| 28.032 | 0          | 4.6056 | 232780000   | 11   | P97765   |
| 66.406 | 0          | 323.31 | 17981000000 | 316  | O88342   |
| 102.31 | 0.0035074  | 1.9765 | 164450000   | 12   | Q8CGF6   |
| 33.772 | 0          | 48.245 | 305760000   | 13   | Q9ERF3   |
| 100.58 | 0.0087912  | 1.3966 | 7026700000  | 19   | P56695   |
| 27.095 | 0          | 54.028 | 4280900000  | 87   | Q9Z0G4   |
| 146.56 | 0          | 20.767 | 379310000   | 25   | Q00519   |
| 123.43 | 0          | 64.044 | 1165900000  | 46   | O70373   |
| 69.59  | 0          | 4.4144 | 291010000   | 11   | Q6P1B1   |

|        |           |        |             |     |          |
|--------|-----------|--------|-------------|-----|----------|
| 123.09 | 0         | 50.209 | 1387800000  | 60  | Q6P5F9   |
| 43.838 | 0.0070816 | 1.5347 | 95912000    | 13  | Q3U4G3   |
| 59.105 | 0         | 19.983 | 546540000   | 33  | Q91WQ3   |
| 35.73  | 0         | 4.138  | 71591000    | 4   | P62960   |
| 60.629 | 0.0084466 | 1.4151 | 129410000   | 7   | Q04736   |
| 22.314 | 0         | 8.1242 | 220150000   | 5   | Q9CQW1   |
| 27.854 | 0         | 312.47 | 7099300000  | 81  | Q9CQV8-2 |
| 29.174 | 0         | 168.24 | 10016000000 | 169 | P62259   |
| 28.302 | 0         | 239.61 | 9825900000  | 132 | P61982   |
| 28.211 | 0         | 98.604 | 2233700000  | 69  | P68510   |
| 27.7   | 0         | 323.31 | 15575000000 | 105 | P68254-2 |
| 27.771 | 0         | 323.31 | 32705000000 | 420 | P63101   |
| 32.841 | 0         | 17.268 | 566550000   | 12  | Q9ESL4-3 |
| 131.6  | 0.0016188 | 2.4999 | 30880000    | 2   | Q6ZPZ3-2 |
| 36.384 | 0         | 9.5057 | 16417000    | 2   | P23950   |
| 57.232 | 0.0070527 | 1.5028 | 284820000   | 11  | P16372   |
| 54.734 | 0         | 6.9516 | 184930000   | 12  | Q80W54   |
| 88.062 | 0         | 9.5345 | 71610000    | 4   | O54692   |
| 60.545 | 0         | 323.31 | 33207000000 | 406 | Q62523   |



**Protein names**

Alpha-2-macroglobulin  
Alanine--tRNA ligase, cytoplasmic  
Alanyl-tRNA editing protein Aarsd1  
4-aminobutyrate aminotransferase, mitochondrial  
ATP-binding cassette sub-family A member 8-B  
ATP-binding cassette sub-family C member 9  
ATP-binding cassette sub-family D member 3  
ATP-binding cassette sub-family E member 1  
ATP-binding cassette sub-family F member 1  
Alpha/beta hydrolase domain-containing protein 11  
Monoacylglycerol lipase ABHD12  
Alpha/beta hydrolase domain-containing protein 14B  
Abhydrolase domain-containing protein 16A  
1-acylglycerol-3-phosphate O-acyltransferase ABHD5  
Abl interactor 1  
Actin-binding LIM protein 1  
Costars family protein ABRACL  
3-ketoacyl-CoA thiolase A, peroxisomal  
3-ketoacyl-CoA thiolase, mitochondrial  
Acetyl-CoA carboxylase 1  
Acyl-CoA dehydrogenase family member 10  
Acyl-CoA dehydrogenase family member 9, mitochondrial  
Long-chain specific acyl-CoA dehydrogenase, mitochondrial  
Medium-chain specific acyl-CoA dehydrogenase, mitochondrial  
Short-chain specific acyl-CoA dehydrogenase, mitochondrial  
Short/branched chain specific acyl-CoA dehydrogenase, mitochondrial  
Very long-chain specific acyl-CoA dehydrogenase, mitochondrial  
Aggrecan core protein  
Acetyl-CoA acetyltransferase, mitochondrial  
Acetyl-CoA acetyltransferase, cytosolic  
Angiotensin-converting enzyme  
Apoptotic chromatin condensation inducer in the nucleus  
ATP-citrate synthase  
Cytoplasmic aconitate hydratase  
Aconitate hydratase, mitochondrial  
Acyl-coenzyme A thioesterase 11  
Acyl-coenzyme A thioesterase 13  
Acyl-coenzyme A thioesterase 2, mitochondrial

Cytosolic acyl coenzyme A thioester hydrolase  
Acyl-coenzyme A thioesterase 9, mitochondrial  
Low molecular weight phosphotyrosine protein phosphatase  
Acyl-CoA synthetase family member 2, mitochondrial  
Acyl-CoA synthetase family member 3, mitochondrial  
Long-chain-fatty-acid--CoA ligase 1  
Long-chain-fatty-acid--CoA ligase 5  
Actin, aortic smooth muscle  
Actin, cytoplasmic 1  
Actin, alpha cardiac muscle 1  
Actin, cytoplasmic 2  
Actin-like protein 6A  
Alpha-actinin-1  
Alpha-actinin-4  
Actin-related protein 10  
Alpha-centractin  
Beta-centractin  
Actin-related protein 2  
Actin-related protein 3  
Acylphosphatase-1  
Disintegrin and metalloproteinase domain-containing protein 10  
ADAMTS-like protein 4  
Atypical kinase ADCK3, mitochondrial  
Adenylate cyclase type 5  
Adenylate cyclase type 7  
Alpha-adducin  
Gamma-adducin  
Alcohol dehydrogenase 1  
Alcohol dehydrogenase class-3  
Alcohol dehydrogenase class 4 mu/sigma chain  
Adiponectin  
Adenosine kinase  
ADP-dependent glucokinase  
Beta-adrenergic receptor kinase 2  
Proteasomal ubiquitin receptor ADRM1  
Adenylosuccinate lyase  
Adenylosuccinate synthetase isozyme 1  
Adipocyte enhancer-binding protein 1  
AFG3-like protein 2  
Afamin  
Uncharacterized protein C11orf96 homolog

N(4)-(beta-N-acetylglucosaminy)-L-asparaginase  
Acylglycerol kinase, mitochondrial  
Protein argonaute-2  
1-acyl-sn-glycerol-3-phosphate acyltransferase beta  
Agrin  
Adenosylhomocysteinase  
Putative adenosylhomocysteinase 2  
Activator of 90 kDa heat shock protein ATPase homolog 1  
Alpha-2-HS-glycoprotein  
Apoptosis-inducing factor 1, mitochondrial  
Apoptosis-inducing factor 2  
Aminoacyl tRNA synthase complex-interacting multifunctional protein 1  
Aminoacyl tRNA synthase complex-interacting multifunctional protein 2  
AH receptor-interacting protein  
Adenylate kinase isoenzyme 1  
Adenylate kinase 2, mitochondrial  
GTP:AMP phosphotransferase AK3, mitochondrial  
A-kinase anchor protein 12  
Alcohol dehydrogenase [NADP(+)]  
Aldose reductase  
Aldose reductase-related protein 1  
Aldose reductase-related protein 2  
Aflatoxin B1 aldehyde reductase member 2  
Proline-rich AKT1 substrate 1  
Delta-aminolevulinic acid dehydratase  
Serum albumin  
CD166 antigen  
Aldehyde dehydrogenase family 16 member A1  
Delta-1-pyrroline-5-carboxylate synthase  
Retinal dehydrogenase 1  
Mitochondrial 10-formyltetrahydrofolate dehydrogenase  
Aldehyde dehydrogenase, mitochondrial  
Fatty aldehyde dehydrogenase  
Delta-1-pyrroline-5-carboxylate dehydrogenase, mitochondrial  
Succinate-semialdehyde dehydrogenase, mitochondrial  
Methylmalonate-semialdehyde dehydrogenase [acylating], mitochondrial  
Alpha-aminoadipic semialdehyde dehydrogenase  
4-trimethylaminobutyraldehyde dehydrogenase  
Fructose-bisphosphate aldolase A  
Alpha-1,3/1,6-mannosyltransferase ALG2  
Arachidonate 5-lipoxygenase-activating protein

THO complex subunit 4  
Anaphase-promoting complex subunit 1  
Ankyrin-1  
Ankyrin-2  
Rabankyrin-5  
Anoctamin-10  
Anoctamin-6  
Acidic leucine-rich nuclear phosphoprotein 32 family member A  
Acidic leucine-rich nuclear phosphoprotein 32 family member B  
Acidic leucine-rich nuclear phosphoprotein 32 family member E  
Aminopeptidase N  
Annexin A1  
Annexin A11  
Annexin A2  
Annexin A3  
Annexin A4  
Annexin A5  
Annexin A6  
Annexin A7  
Membrane primary amine oxidase  
Aldehyde oxidase 1  
AP-1 complex subunit beta-1  
AP-1 complex subunit gamma-1  
AP-2 complex subunit alpha-1  
AP-2 complex subunit alpha-2  
AP-2 complex subunit beta  
AP-2 complex subunit mu  
AP-2 complex subunit sigma  
AP-3 complex subunit beta-1  
AP-3 complex subunit delta-1  
Acylamino-acid-releasing enzyme  
DNA-(apurinic or apyrimidinic site) lyase  
Apoptosis inhibitor 5  
Adipocyte plasma membrane-associated protein  
Apolipoprotein A-I  
NAD(P)H-hydrate epimerase  
Apolipoprotein A-II  
Apolipoprotein A-IV  
Apolipoprotein C-I  
Apolipoprotein C-II  
Apolipoprotein E

Beta-2-glycoprotein 1  
Apolipoprotein O  
MICOS complex subunit Mic27  
Amyloid beta A4 protein  
DCC-interacting protein 13-alpha  
Adenine phosphoribosyltransferase  
Aquaporin-1  
Coatmer subunit delta  
ADP-ribosylation factor 1  
ADP-ribosylation factor 2  
ADP-ribosylation factor 4  
ADP-ribosylation factor 5  
ADP-ribosylation factor 6  
Brefeldin A-inhibited guanine nucleotide-exchange protein 2  
Rho GTPase-activating protein 1  
Rho GTPase-activating protein 17  
Rho GTPase-activating protein 32  
Rho GDP-dissociation inhibitor 1  
Rho GDP-dissociation inhibitor 2  
Rho guanine nucleotide exchange factor 2  
Rho guanine nucleotide exchange factor 7  
ADP-ribosylation factor-like protein 1  
ADP-ribosylation factor-like protein 3  
ADP-ribosylation factor-like protein 6-interacting protein 1  
PRA1 family protein 3  
ADP-ribosylation factor-like protein 8B  
Armadillo repeat-containing protein 1  
Actin-related protein 2/3 complex subunit 1B  
Actin-related protein 2/3 complex subunit 2  
Actin-related protein 2/3 complex subunit 3  
Actin-related protein 2/3 complex subunit 4  
Actin-related protein 2/3 complex subunit 5  
Actin-related protein 2/3 complex subunit 5-like protein  
Acid ceramidase  
Argininosuccinate lyase  
ATPase Asna1  
Aspartyl/asparaginyl beta-hydroxylase  
Asporin  
Isoaspartyl peptidase/L-asparaginase  
ATPase family AAA domain-containing protein 3  
Autophagy protein 5

Ubiquitin-like modifier-activating enzyme ATG7  
Bifunctional purine biosynthesis protein PURH  
Atlastin-2  
Atlastin-3  
Copper transport protein ATOX1  
Sodium/potassium-transporting ATPase subunit alpha-1  
Sodium/potassium-transporting ATPase subunit alpha-2  
Sodium/potassium-transporting ATPase subunit beta-1  
Sodium/potassium-transporting ATPase subunit beta-3  
Sarcoplasmic/endoplasmic reticulum calcium ATPase 2  
Sarcoplasmic/endoplasmic reticulum calcium ATPase 3  
Plasma membrane calcium-transporting ATPase 1  
Calcium-transporting ATPase  
ATP synthase subunit alpha, mitochondrial  
ATP synthase subunit beta, mitochondrial  
ATP synthase subunit gamma, mitochondrial  
ATP synthase F(0) complex subunit B1, mitochondrial  
ATP synthase subunit d, mitochondrial  
ATP synthase subunit e, mitochondrial  
ATP synthase-coupling factor 6, mitochondrial  
ATP synthase subunit f, mitochondrial  
ATP synthase subunit g, mitochondrial  
ATP synthase subunit O, mitochondrial  
V-type proton ATPase 116 kDa subunit a isoform 1  
V-type proton ATPase subunit d 1  
V-type proton ATPase catalytic subunit A  
V-type proton ATPase subunit B, brain isoform  
V-type proton ATPase subunit E 1  
Ataxin-10  
Methylglutaconyl-CoA hydratase, mitochondrial  
Tyrosine-protein kinase receptor UFO  
Beta-2-microglobulin  
Beta-1,4-galactosyltransferase 2  
BAG family molecular chaperone regulator 3  
BAG family molecular chaperone regulator 5  
Large proline-rich protein BAG6  
Barrier-to-autointegration factor  
Apoptosis regulator BAX  
Basal cell adhesion molecule  
Breast cancer anti-estrogen resistance protein 1  
Breast carcinoma-amplified sequence 3 homolog

Branched-chain-amino-acid aminotransferase, mitochondrial  
2-oxoisovalerate dehydrogenase subunit alpha, mitochondrial  
2-oxoisovalerate dehydrogenase subunit beta, mitochondrial  
[3-methyl-2-oxobutanoate dehydrogenase [lipoamide]] kinase, mitochondrial  
Biglycan  
Bleomycin hydrolase  
Biliverdin reductase A  
Flavin reductase (NADPH)  
Bisphosphoglycerate mutase  
Valacyclovir hydrolase  
3(2),5-bisphosphate nucleotidase 1  
BRCA1-A complex subunit BRE  
BRO1 domain-containing protein BROX  
Transcription factor BTF3  
Tyrosine-protein kinase BTK  
Peripheral-type benzodiazepine receptor-associated protein 1  
Complement component 1 Q subcomponent-binding protein, mitochondrial  
Complement C3  
Complement C4-B  
C4b-binding protein  
Complement C5  
Complement component C9  
Carbonic anhydrase 1  
Carbonic anhydrase 2  
Carbonic anhydrase 3  
Calcium-binding protein 39  
Voltage-dependent calcium channel subunit alpha-2/delta-1  
Calcyclin-binding protein  
CAD protein  
Calmodulin-3  
Calreticulin  
Calumenin  
Calcium/calmodulin-dependent protein kinase type 1  
Calcium/calmodulin-dependent protein kinase type II subunit delta  
Calcium/calmodulin-dependent protein kinase type II subunit gamma  
Calcium signal-modulating cyclophilin ligand  
Cullin-associated NEDD8-dissociated protein 1  
Calnexin  
Adenylyl cyclase-associated protein 1  
Adenylyl cyclase-associated protein 2  
Macrophage-capping protein

Calpain-1 catalytic subunit  
Calpain-2 catalytic subunit  
Calpain small subunit 1  
Caprin-1  
F-actin-capping protein subunit alpha-1  
F-actin-capping protein subunit alpha-2  
F-actin-capping protein subunit beta  
Calcium-regulated heat stable protein 1  
ATP-dependent (S)-NAD(P)H-hydrate dehydratase  
ATP-dependent (S)-NAD(P)H-hydrate dehydratase  
Histone-arginine methyltransferase CARM1  
Cysteine--tRNA ligase, cytoplasmic  
Caspase-8  
Calsequestrin-1  
Calpastatin  
Catalase  
Caveolin-1  
Caveolin-2  
Carbonyl reductase [NADPH] 1  
Carbonyl reductase [NADPH] 2  
Carbonyl reductase [NADPH] 3  
Cell division cycle and apoptosis regulator protein 1  
Cell cycle and apoptosis regulator protein 2  
Kynurenine--oxoglutarate transaminase 3  
Coiled-coil domain-containing protein 127  
Coiled-coil domain-containing protein 47  
Coiled-coil domain-containing protein 80  
Coiled-coil domain-containing protein 90B, mitochondrial  
Cyclin-Y  
T-complex protein 1 subunit beta  
T-complex protein 1 subunit gamma  
T-complex protein 1 subunit delta  
T-complex protein 1 subunit epsilon  
T-complex protein 1 subunit zeta  
T-complex protein 1 subunit eta  
T-complex protein 1 subunit theta  
CD109 antigen  
CD151 antigen  
Scavenger receptor cysteine-rich type 1 protein M130  
OX-2 membrane glycoprotein  
CD2-associated protein



Hematopoietic progenitor cell antigen CD34  
Platelet glycoprotein 4  
CD44 antigen  
Leukocyte surface antigen CD47  
CD81 antigen  
CD9 antigen  
CD97 antigen  
CD99 antigen  
Hsp90 co-chaperone Cdc37  
Cell division control protein 42 homolog  
Serine/threonine-protein kinase MRCK beta  
Cadherin-13  
Cadherin-6  
CDP-diacylglycerol--inositol 3-phosphatidyltransferase  
Cyclin-dependent kinase 13  
Cyclin-dependent-like kinase 5  
Phosphatidate cytidylyltransferase 2  
CUGBP Elav-like family member 2  
Centromere protein V  
Carboxylesterase 1C  
Carboxylesterase 1D  
Complement factor B  
Complement factor D  
Complement factor H  
Complement factor I  
Cofilin-1  
Cofilin-2  
MICOS complex subunit Mic19  
MICOS complex subunit Mic25  
Chromodomain-helicase-DNA-binding protein 4  
Charged multivesicular body protein 3  
Charged multivesicular body protein 4b  
Carbohydrate sulfotransferase 12  
Chromatin target of PRMT1 protein  
CDGSH iron-sulfur domain-containing protein 1  
Cytoskeleton-associated protein 4  
Creatine kinase B-type  
Creatine kinase M-type  
CLIP-associating protein 1  
Chloride channel CLIC-like protein 1  
C-type lectin domain family 10 member A

Tetranectin  
Chloride intracellular channel protein 1  
Chloride intracellular channel protein 4  
Clathrin interactor 1  
Cleft lip and palate transmembrane protein 1-like protein  
Clathrin light chain B  
Clathrin heavy chain 1  
Clusterin  
Citrate lyase subunit beta-like protein, mitochondrial  
Chymase  
UMP-CMP kinase  
Cellular nucleic acid-binding protein  
Cytosolic non-specific dipeptidase  
Calponin-1  
Calponin-2  
Calponin-3  
2,3-cyclic-nucleotide 3-phosphodiesterase  
Protein canopy homolog 2  
Protein canopy homolog 4  
Cytochrome c oxidase assembly factor 3 homolog, mitochondrial  
Bifunctional coenzyme A synthase  
Collagen alpha-1(XII) chain  
Collagen alpha-1(XIV) chain  
Collagen alpha-1(XV) chain  
Collagen alpha-1(XVIII) chain  
Collagen alpha-1(I) chain  
Collagen alpha-2(I) chain  
Collagen alpha-1(II) chain  
Collagen alpha-1(III) chain  
Collagen alpha-1(IV) chain  
Collagen alpha-2(IV) chain  
Collagen alpha-3(IV) chain  
Collagen alpha-4(IV) chain  
Collagen alpha-1(V) chain  
Collagen alpha-2(V) chain  
Collagen alpha-1(VI) chain  
Collagen alpha-2(VI) chain  
Collagen alpha-5(VI) chain  
Collagen alpha-6(VI) chain  
Procollagen galactosyltransferase 1  
COMM domain-containing protein 3

COMM domain-containing protein 4  
COMM domain-containing protein 9  
Catechol O-methyltransferase  
Catechol O-methyltransferase domain-containing protein 1  
Coatomer subunit alpha  
Coatomer subunit beta  
Coatomer subunit beta  
Coatomer subunit epsilon  
Coatomer subunit gamma-1  
Coatomer subunit gamma-2  
COP9 signalosome complex subunit 2  
COP9 signalosome complex subunit 3  
COP9 signalosome complex subunit 4  
COP9 signalosome complex subunit 5  
COP9 signalosome complex subunit 6  
COP9 signalosome complex subunit 7a  
Coatomer subunit zeta-1  
Coenzyme Q-binding protein COQ10 homolog B, mitochondrial  
Ubiquinone biosynthesis monooxygenase COQ6, mitochondrial  
Ubiquinone biosynthesis protein COQ9, mitochondrial  
Coronin-1A  
Coronin-1B  
Coronin-1C  
Coactosin-like protein  
Cytochrome c oxidase subunit 4 isoform 1, mitochondrial  
Cytochrome c oxidase subunit 5A, mitochondrial  
Cytochrome c oxidase subunit 5B, mitochondrial  
Cytochrome c oxidase subunit 6A1, mitochondrial  
Cytochrome c oxidase subunit 6B1  
Cytochrome c oxidase subunit 6C  
Cytochrome c oxidase subunit 7A1, mitochondrial  
Cytochrome c oxidase subunit 7A2, mitochondrial  
Cytochrome c oxidase subunit 7C, mitochondrial  
Ceruloplasmin  
Mast cell carboxypeptidase A  
Carboxypeptidase E  
Copine-1  
Copine-2  
Copine-3  
Oxygen-dependent coproporphyrinogen-III oxidase, mitochondrial  
Serine/threonine-protein phosphatase CPPED1

Carboxypeptidase Q  
Cleavage and polyadenylation specificity factor subunit 6  
Cleavage and polyadenylation specificity factor subunit 7  
Carnitine O-palmitoyltransferase 1, liver isoform  
Carnitine O-palmitoyltransferase 1, muscle isoform  
Carnitine O-palmitoyltransferase 2, mitochondrial  
Complement component receptor 1-like protein  
Carnitine O-acetyltransferase  
Cysteine-rich with EGF-like domain protein 1  
Cysteine-rich protein 1  
Cysteine-rich protein 2  
Adapter molecule crk  
Crk-like protein  
Alpha-crystallin B chain  
Lambda-crystallin homolog  
Quinone oxidoreductase  
Citrate synthase, mitochondrial  
Cysteine sulfinic acid decarboxylase  
Exportin-2  
Tyrosine-protein kinase CSK  
Casein kinase I isoform alpha  
Casein kinase II subunit alpha  
Casein kinase II subunit beta  
Chondroitin sulfate proteoglycan 4  
Cysteine and glycine-rich protein 1  
Cysteine and glycine-rich protein 2  
Cystatin-C  
Cystatin-B  
Cleavage stimulation factor subunit 2  
C-terminal-binding protein 1  
Transcriptional repressor CTCF  
Catenin alpha-1  
Catenin alpha-2  
Catenin alpha-3  
Alpha-catulin  
Catenin beta-1  
Beta-catenin-like protein 1  
Catenin delta-1  
Cathepsin B  
Cathepsin D  
Pro-cathepsin H

Src substrate cortactin  
CTTNBP2 N-terminal-like protein  
Cullin-1  
Cullin-3  
Cullin-4A  
Cullin-5  
Protein CutA  
Copper homeostasis protein cutC homolog  
Stromal cell-derived factor 1  
Cytochrome b5  
Cytochrome b5 type B  
NADH-cytochrome b5 reductase 1  
NADH-cytochrome b5 reductase 3  
Cytochrome b-245 chaperone 1  
Cytochrome c1, heme protein, mitochondrial  
Cytochrome c, somatic  
Cytoplasmic FMR1-interacting protein 1  
Cytoglobin  
Cytochrome P450 20A1  
Cytochrome P450 2F2  
Cytochrome P450 4B1  
ES1 protein homolog, mitochondrial  
Disheveled-associated activator of morphogenesis 1  
Disabled homolog 2  
Dystroglycan  
Death-associated protein kinase 3  
Aspartate--tRNA ligase, cytoplasmic  
DAZ-associated protein 1  
Acyl-CoA-binding protein  
Drebrin-like protein  
Lipoamide acyltransferase component of branched-chain alpha-keto acid dehydrogenase con  
Decorin  
m7GpppX diphosphatase  
Dynactin subunit 1  
Dynactin subunit 2  
Dynactin subunit 3  
Dynactin subunit 5  
L-xylulose reductase  
N(G),N(G)-dimethylarginine dimethylaminohydrolase 2  
DNA damage-binding protein 1  
Phospholipase DDHD2

Dolichyl-diphosphooligosaccharide--protein glycosyltransferase 48 kDa subunit  
DDRKG domain-containing protein 1  
D-dopachrome decarboxylase  
ATP-dependent RNA helicase DDX1  
Probable ATP-dependent RNA helicase DDX17  
Nucleolar RNA helicase 2  
ATP-dependent RNA helicase DDX25  
Spliceosome RNA helicase Ddx39b  
ATP-dependent RNA helicase DDX3X  
ATP-dependent RNA helicase DDX3Y  
ATP-dependent RNA helicase DDX42  
Probable ATP-dependent RNA helicase DDX46  
Probable ATP-dependent RNA helicase DDX5  
ATP-dependent RNA helicase DDX50  
Probable ATP-dependent RNA helicase DDX6  
2,4-dienoyl-CoA reductase, mitochondrial  
Protein DEK  
Derlin-1  
Desmin  
Trans-1,2-dihydrobenzene-1,2-diol dehydrogenase  
Dehydrogenase/reductase SDR family member 1  
Dehydrogenase/reductase SDR family member 7B  
Pre-mRNA-splicing factor ATP-dependent RNA helicase DHX15  
ATP-dependent RNA helicase Dhx29  
ATP-dependent RNA helicase A  
Protein diaphanous homolog 1  
H/ACA ribonucleoprotein complex subunit 4  
Dihydrolipoyllysine-residue acetyltransferase component of pyruvate dehydrogenase comple  
Dihydrolipoyl dehydrogenase, mitochondrial  
Dihydrolipoyllysine-residue succinyltransferase component of 2-oxoglutarate dehydrogenase  
Dystrophin  
Myotonin-protein kinase  
DnaJ homolog subfamily A member 1  
DnaJ homolog subfamily A member 2  
DnaJ homolog subfamily A member 3, mitochondrial  
DnaJ homolog subfamily B member 4  
DnaJ homolog subfamily C member 10  
DnaJ homolog subfamily C member 11  
Mitochondrial import inner membrane translocase subunit TIM14  
DnaJ homolog subfamily C member 3  
Dynamin-1

Dynammin-1-like protein  
Dynammin-2  
Aspartyl aminopeptidase  
Dedicator of cytokinesis protein 7  
Dipeptidase 1  
Dipeptidyl peptidase 3  
Dipeptidyl peptidase 2  
Dermatopontin  
Protein dpy-30 homolog  
Dihydropyrimidinase-related protein 2  
Dihydropyrimidinase-related protein 3  
Dr1-associated corepressor  
Desmoplakin  
Dystonin  
Destrin  
Probable D-tyrosyl-tRNA(Tyr) deacylase 2  
Dystrobrevin alpha  
Dual specificity protein phosphatase 19  
Dual specificity protein phosphatase 3  
Cytoplasmic dynein 1 heavy chain 1  
Cytoplasmic dynein 1 intermediate chain 2  
Cytoplasmic dynein 1 light intermediate chain 1  
Dynein light chain 1, cytoplasmic  
Dynein light chain roadblock-type 1  
Dynein light chain Tctex-type 1  
Dynein light chain Tctex-type 3  
Dysferlin  
Delta(3,5)-Delta(2,4)-dienoyl-CoA isomerase, mitochondrial  
Enoyl-CoA hydratase domain-containing protein 2, mitochondrial  
Enoyl-CoA hydratase, mitochondrial  
Enoyl-CoA delta isomerase 1, mitochondrial  
Enoyl-CoA delta isomerase 2, mitochondrial  
Extracellular matrix protein 1  
Proteasome-associated protein ECM29 homolog  
Evolutionarily conserved signaling intermediate in Toll pathway, mitochondrial  
Elongation factor 1-alpha 1  
Elongation factor 1-beta  
Elongation factor 1-delta  
Eukaryotic translation elongation factor 1 epsilon-1  
Elongation factor 1-gamma  
Elongation factor 2

EGF-containing fibulin-like extracellular matrix protein 1  
EGF-containing fibulin-like extracellular matrix protein 2  
EF-hand domain-containing protein D1  
EF-hand domain-containing protein D2  
Protein EFR3 homolog A  
116 kDa U5 small nuclear ribonucleoprotein component  
Epidermal growth factor receptor  
EH domain-binding protein 1-like protein 1  
EH domain-containing protein 1  
EH domain-containing protein 2  
EH domain-containing protein 3  
EH domain-containing protein 4  
Eukaryotic translation initiation factor 2 subunit 1  
Eukaryotic translation initiation factor 2 subunit 3, X-linked  
Eukaryotic translation initiation factor 3 subunit A  
Eukaryotic translation initiation factor 3 subunit B  
Eukaryotic translation initiation factor 3 subunit C  
Eukaryotic translation initiation factor 3 subunit D  
Eukaryotic translation initiation factor 3 subunit E  
Eukaryotic translation initiation factor 3 subunit F  
Eukaryotic translation initiation factor 3 subunit G  
Eukaryotic translation initiation factor 3 subunit H  
Eukaryotic translation initiation factor 3 subunit J-A  
Eukaryotic translation initiation factor 3 subunit K  
Eukaryotic translation initiation factor 3 subunit L  
Eukaryotic translation initiation factor 3 subunit M  
Eukaryotic initiation factor 4A-I  
Eukaryotic initiation factor 4A-II  
Eukaryotic initiation factor 4A-III  
Eukaryotic translation initiation factor 4B  
Eukaryotic translation initiation factor 4E  
Eukaryotic translation initiation factor 4 gamma 1  
Eukaryotic translation initiation factor 4 gamma 2  
Eukaryotic translation initiation factor 4H  
Eukaryotic translation initiation factor 5  
Eukaryotic translation initiation factor 5A-1  
Eukaryotic translation initiation factor 5B  
ELAV-like protein 1  
Elastin  
Elongation of very long chain fatty acids protein 1  
ER membrane protein complex subunit 1



ER membrane protein complex subunit 8  
Emerin  
EMILIN-1  
Echinoderm microtubule-associated protein-like 1  
Echinoderm microtubule-associated protein-like 2  
Protein enabled homolog  
Endonuclease domain-containing 1 protein  
Alpha-enolase  
Gamma-enolase  
Beta-enolase  
Glutamyl aminopeptidase  
Ectonucleotide pyrophosphatase/phosphodiesterase family member 1  
Ectonucleotide pyrophosphatase/phosphodiesterase family member 3  
Bis(5-adenosyl)-triphosphatase enpp4  
Ectonucleoside triphosphate diphosphohydrolase 1  
Ectonucleoside triphosphate diphosphohydrolase 2  
Protein 4.1  
Band 4.1-like protein 2  
Epoxide hydrolase 1  
Bifunctional epoxide hydrolase 2  
Epsin-1  
Epsin-2  
Epsin-3  
Epiplakin  
Bifunctional glutamate/proline--tRNA ligase  
Epidermal growth factor receptor substrate 15  
Epidermal growth factor receptor kinase substrate 8-like protein 2  
Endoplasmic reticulum aminopeptidase 1  
Protein LAP2  
Endoplasmic reticulum-Golgi intermediate compartment protein 1  
Enhancer of rudimentary homolog  
ERO1-like protein alpha  
Endoplasmic reticulum resident protein 29  
Endoplasmic reticulum resident protein 44  
S-formylglutathione hydrolase  
Extended synaptotagmin-1  
Extended synaptotagmin-2  
Eukaryotic peptide chain release factor subunit 1  
Electron transfer flavoprotein subunit alpha, mitochondrial  
Electron transfer flavoprotein subunit beta  
Electron transfer flavoprotein-ubiquinone oxidoreductase, mitochondrial

Persulfide dioxygenase ETHE1, mitochondrial  
Exocyst complex component 2  
Exocyst complex component 6B  
Coagulation factor XIII A chain  
Prothrombin  
Fatty acid-binding protein, heart  
Fatty acid-binding protein, adipocyte  
FAS-associated factor 2  
Fumarylacetoacetase  
Protein Noxp20  
Constitutive coactivator of PPAR-gamma-like protein 1  
Protein Niban  
Niban-like protein 1  
Protein FAM162A  
BRISC complex subunit Abro1  
Redox-regulatory protein FAM213A  
Protein FAM3C  
Protein FAM50B  
Protein FAM98A  
Protein FAM98B  
Phenylalanine--tRNA ligase alpha subunit  
Phenylalanine--tRNA ligase beta subunit  
Fatty acid synthase  
40S ribosomal protein S30  
rRNA 2-O-methyltransferase fibrillar  
Filamin-binding LIM protein 1  
Fibulin-1  
Fibulin-1  
Fibulin-2  
Fibulin-5  
Fibrillin-1  
Fibrillin-2  
F-box only protein 2  
F-box only protein 30  
F-box only protein 6  
IgG receptor FcRn large subunit p51  
F-BAR domain only protein 2  
Farnesyl pyrophosphate synthase  
Ferrochelatase, mitochondrial  
Fermitin family homolog 2  
Fermitin family homolog 3

Fetuin-B  
Fibrinogen alpha chain  
Fibrinogen beta chain  
Fibroblast growth factor 1  
Fibrinogen gamma chain  
Fibroleukin  
Fumarate hydratase, mitochondrial  
Four and a half LIM domains protein 1  
Four and a half LIM domains protein 3  
Filamin A-interacting protein 1-like  
Mitochondrial fission 1 protein  
Peptidyl-prolyl cis-trans isomerase FKBP10  
Peptidyl-prolyl cis-trans isomerase FKBP1A  
Peptidyl-prolyl cis-trans isomerase FKBP2  
Peptidyl-prolyl cis-trans isomerase FKBP3  
Peptidyl-prolyl cis-trans isomerase FKBP4  
Peptidyl-prolyl cis-trans isomerase FKBP9  
Protein flightless-1 homolog  
Filamin-A  
Filamin-B  
Filamin-C  
Flotillin-1  
Flotillin-2  
Formin-like protein 3  
Dimethylaniline monooxygenase [N-oxide-forming] 1  
Dimethylaniline monooxygenase [N-oxide-forming] 2  
Dimethylaniline monooxygenase [N-oxide-forming] 3  
Fibromodulin  
Fragile X mental retardation protein 1 homolog  
Fibronectin  
Protein farnesyltransferase/geranylgeranyltransferase type-1 subunit alpha  
Glutamate carboxypeptidase 2  
Protein furry homolog  
Follistatin-related protein 1  
Ferritin heavy chain  
Ferritin light chain 1  
FUN14 domain-containing protein 2  
Fucose mutarotase  
RNA-binding protein FUS  
Fragile X mental retardation syndrome-related protein 1  
Ras GTPase-activating protein-binding protein 1

Ras GTPase-activating protein-binding protein 2  
Glucose-6-phosphate 1-dehydrogenase X  
Lysosomal alpha-glucosidase  
Gamma-aminobutyric acid receptor-associated protein  
Cyclin-G-associated kinase  
Galactokinase  
Aldose 1-epimerase  
Guanidinoacetate N-methyltransferase  
Neutral alpha-glucosidase AB  
Glyceraldehyde-3-phosphate dehydrogenase  
Glycine--tRNA ligase  
Trifunctional purine biosynthetic protein adenosine-3  
Protein NipSnap homolog 2  
1,4-alpha-glucan-branching enzyme  
Interferon-induced guanylate-binding protein 2  
Vitamin D-binding protein  
2-amino-3-ketobutyrate coenzyme A ligase, mitochondrial  
Glutaryl-CoA dehydrogenase, mitochondrial  
eIF-2-alpha kinase activator GCN1  
Guanine deaminase  
Rab GDP dissociation inhibitor alpha  
Rab GDP dissociation inhibitor beta  
Vitamin K-dependent gamma-carboxylase  
Glucose-induced degradation protein 8 homolog  
GTPase IMAP family member 4  
ARF GTPase-activating protein GIT1  
ARF GTPase-activating protein GIT2  
Golgi apparatus protein 1  
Lactoylglutathione lyase  
Glyoxalase domain-containing protein 4  
Glutaredoxin-1  
Glutaredoxin-3  
Glutaminase kidney isoform, mitochondrial  
Glycolipid transfer protein  
Glutamate dehydrogenase 1, mitochondrial  
Glutamine synthetase  
Putative oxidoreductase GLYR1  
Glia maturation factor beta  
Mannose-1-phosphate guanyltransferase alpha  
Mannose-1-phosphate guanyltransferase beta  
GMP synthase [glutamine-hydrolyzing]

Guanine nucleotide-binding protein subunit alpha-11  
Guanine nucleotide-binding protein subunit alpha-13  
Guanine nucleotide-binding protein G(i) subunit alpha-1  
Guanine nucleotide-binding protein G(i) subunit alpha-2  
Guanine nucleotide-binding protein G(o) subunit alpha  
Guanine nucleotide-binding protein G(o) subunit alpha  
Guanine nucleotide-binding protein G(q) subunit alpha  
Guanine nucleotide-binding protein G(s) subunit alpha isoforms short  
Guanine nucleotide-binding protein G(l)/G(s)/G(t) subunit beta-1  
Guanine nucleotide-binding protein G(l)/G(s)/G(t) subunit beta-2  
Guanine nucleotide-binding protein subunit beta-2-like 1  
Guanine nucleotide-binding protein subunit beta-4  
Guanine nucleotide-binding protein G(l)/G(s)/G(o) subunit gamma-12  
Guanine nucleotide-binding protein G(l)/G(s)/G(o) subunit gamma-5  
Glucosamine-6-phosphate isomerase 2  
Glucosamine 6-phosphate N-acetyltransferase  
Golgin subfamily A member 2  
Golgi reassembly-stacking protein 2  
Golgi SNAP receptor complex member 2  
Aspartate aminotransferase, cytoplasmic  
Aspartate aminotransferase, mitochondrial  
Platelet glycoprotein V  
Glypican-4  
Glypican-6  
Glycerol-3-phosphate dehydrogenase [NAD(+)], cytoplasmic  
Glycerol-3-phosphate dehydrogenase 1-like protein  
Glycerol-3-phosphate dehydrogenase, mitochondrial  
Glucose-6-phosphate isomerase  
Transmembrane glycoprotein NMB  
COP9 signalosome complex subunit 1  
Glutathione peroxidase 1  
Glutathione peroxidase 3  
Phospholipid hydroperoxide glutathione peroxidase, mitochondrial  
Glutathione peroxidase 7  
Growth factor receptor-bound protein 2  
Glyoxylate reductase/hydroxypyruvate reductase  
Granulins  
GrpE protein homolog 1, mitochondrial  
Glycogen synthase kinase-3 alpha  
Glycogen synthase kinase-3 beta  
Gelsolin

Gelsolin  
Glutathione reductase, mitochondrial  
Glutathione synthetase  
Glutathione S-transferase A3  
Glutathione S-transferase kappa 1  
Glutathione S-transferase Mu 1  
Glutathione S-transferase Mu 2  
Glutathione S-transferase Mu 5  
Glutathione S-transferase Mu 7  
Glutathione S-transferase omega-1  
Glutathione S-transferase P 1  
Glutathione S-transferase theta-1  
Glutathione S-transferase theta-2  
Glutathione S-transferase theta-3  
Maleylacetoacetate isomerase  
General transcription factor II-I  
Guanylate cyclase soluble subunit alpha-3  
Guanylate cyclase soluble subunit beta-1  
PTB domain-containing engulfment adapter protein 1  
Glycogenin-1  
Glycogen [starch] synthase, muscle  
Histone H1.0  
H-2 class II histocompatibility antigen, A-B alpha chain  
H-2 class I histocompatibility antigen, D-B alpha chain  
H-2 class I histocompatibility antigen, K-B alpha chain  
H-2 class I histocompatibility antigen, Q10 alpha chain  
Histone H2A.V  
Core histone macro-H2A.1  
Core histone macro-H2A.2  
Histone H3.3  
GDH/6PGL endoplasmic bifunctional protein  
Hydroxyacyl-coenzyme A dehydrogenase, mitochondrial  
Trifunctional enzyme subunit alpha, mitochondrial  
Trifunctional enzyme subunit beta, mitochondrial  
Hydroxyacylglutathione hydrolase, mitochondrial  
Hepcidin  
Hyalurond and proteoglycan link protein 1  
Histidine--tRNA ligase, cytoplasmic  
HCLS1-associated protein X-1  
Hemoglobin subunit alpha  
Hemoglobin subunit beta-1

Hemoglobin subunit beta-2  
Hemoglobin subunit beta-H1  
Host cell factor 1  
Histone deacetylase 2  
Hepatoma-derived growth factor  
Hepatoma-derived growth factor-related protein 3  
Haloacid dehalogenase-like hydrolase domain-containing protein 2  
Vigilin  
E3 ubiquitin-protein ligase HECTD1  
Beta-hexosaminidase subunit alpha  
Beta-hexosaminidase subunit beta  
Hepatocyte growth factor-regulated tyrosine kinase substrate  
3-hydroxyisobutyrate dehydrogenase, mitochondrial  
3-hydroxyisobutyryl-CoA hydrolase, mitochondrial  
HIG1 domain family member 1A, mitochondrial  
Histidine triad nucleotide-binding protein 1  
Histidine triad nucleotide-binding protein 2, mitochondrial  
Huntingtin-interacting protein 1  
Histone H1.1  
Histone H1.5  
Histone H1.2  
Histone H1.3  
Histone H1.4  
Histone H2A type 1-H  
Histone H2B type 1-P  
Histone H3.1  
Histone H3.2  
Histone H4  
Histone H2A type 2-B  
Histone H2A type 2-C  
Hexokinase-1  
Hexokinase-2  
Porphobilinogen deaminase  
High mobility group protein B1  
High mobility group protein B2  
Hydroxymethylglutaryl-CoA lyase, mitochondrial  
Hydroxymethylglutaryl-CoA synthase, mitochondrial  
Non-histone chromosomal protein HMG-17  
High mobility group nucleosome-binding domain-containing protein 5  
Heme oxygenase 2  
Heterogeneous nuclear ribonucleoprotein A0

Heterogeneous nuclear ribonucleoprotein A1  
Heterogeneous nuclear ribonucleoproteins A2/B1  
Heterogeneous nuclear ribonucleoprotein A3  
Heterogeneous nuclear ribonucleoprotein A/B  
Heterogeneous nuclear ribonucleoproteins C1/C2  
Heterogeneous nuclear ribonucleoprotein D0  
Heterogeneous nuclear ribonucleoprotein D-like  
Heterogeneous nuclear ribonucleoprotein F  
Heterogeneous nuclear ribonucleoprotein H  
Heterogeneous nuclear ribonucleoprotein H2  
Heterogeneous nuclear ribonucleoprotein K  
Heterogeneous nuclear ribonucleoprotein L  
Heterogeneous nuclear ribonucleoprotein L-like  
Heterogeneous nuclear ribonucleoprotein M  
Heterogeneous nuclear ribonucleoprotein U  
Heterogeneous nuclear ribonucleoprotein U-like protein 1  
Heterogeneous nuclear ribonucleoprotein U-like protein 2  
Protein Hook homolog 3  
Homeobox protein Hox-D8  
Haptoglobin  
Heterochromatin protein 1-binding protein 3  
Hippocalcin-like protein 1  
Hypoxanthine-guanine phosphoribosyltransferase  
Hemopexin  
Histidine-rich glycoprotein  
Heat shock factor-binding protein 1  
Corticosteroid 11-beta-dehydrogenase isozyme 1  
3-hydroxyacyl-CoA dehydrogenase type-2  
Estradiol 17-beta-dehydrogenase 11  
Very-long-chain 3-oxoacyl-CoA reductase  
Peroxisomal multifunctional enzyme type 2  
Hydroxysteroid dehydrogenase-like protein 2  
Heat shock protein HSP 90-alpha  
Heat shock protein HSP 90-beta  
Endoplasmin  
Heat shock 70 kDa protein 12A  
Heat shock 70 kDa protein 12B  
Heat shock 70 kDa protein 1A  
Heat shock 70 kDa protein 1B  
Heat shock-related 70 kDa protein 2  
Heat shock 70 kDa protein 4



Heat shock 70 kDa protein 4L  
78 kDa glucose-regulated protein  
Heat shock cognate 71 kDa protein  
Stress-70 protein, mitochondrial  
Heat shock protein beta-1  
Heat shock protein beta-6  
Heat shock protein beta-7  
Heat shock protein beta-8  
60 kDa heat shock protein, mitochondrial  
10 kDa heat shock protein, mitochondrial  
Basement membrane-specific heparan sulfate proteoglycan core protein  
Heat shock protein 105 kDa  
Serine protease HTRA1  
E3 ubiquitin-protein ligase HUWE1  
Hypoxia up-regulated protein 1  
Isoamyl acetate-hydrolyzing esterase 1 homolog  
Isoleucine--tRNA ligase, cytoplasmic  
Isoleucine--tRNA ligase, mitochondrial  
Inhibitor of carbonic anhydrase  
Intercellular adhesion molecule 1  
Intercellular adhesion molecule 2  
Insulin-degrading enzyme  
Isocitrate dehydrogenase [NADP] cytoplasmic  
Isocitrate dehydrogenase [NADP], mitochondrial  
Isocitrate dehydrogenase [NAD] subunit alpha, mitochondrial  
Isocitrate dehydrogenase [NAD] subunit gamma 1, mitochondrial  
Interferon-induced 35 kDa protein homolog  
Immunoglobulin-binding protein 1  
Insulin-like growth factor-binding protein complex acid labile subunit  
Insulin-like growth factor-binding protein 6  
Insulin-like growth factor-binding protein 7  
Ig gamma-2B chain C region  
Ig gamma-1 chain C region secreted form  
Ig mu chain C region  
Ig kappa chain C region  
Inhibitor of nuclear factor kappa-B kinase-interacting protein  
Inhibitor of nuclear factor kappa-B kinase-interacting protein  
Inhibitor of nuclear factor kappa-B kinase subunit beta  
Interleukin enhancer-binding factor 2  
Interleukin enhancer-binding factor 3  
Integrin-linked protein kinase

Acetolactate synthase-like protein  
MICOS complex subunit Mic60  
Inositol monophosphatase 1  
Inverted formin-2  
Indolethylamine N-methyltransferase  
Inositol polyphosphate 1-phosphatase  
Type I inositol 3,4-bisphosphate 4-phosphatase  
Integrator complex subunit 3  
Importin-4  
Importin-5  
Importin-7  
Importin-9  
Ras GTPase-activating-like protein IQGAP1  
Interferon regulatory factor 2-binding protein-like  
Ubiquitin-like protein ISG15  
Immunoglobulin superfamily containing leucine-rich repeat protein  
Isochorismatase domain-containing protein 1  
Isochorismatase domain-containing protein 2A, mitochondrial  
Inositol-3-phosphate synthase 1  
E3 ubiquitin-protein ligase Itchy  
Integrin alpha-1  
Integrin alpha-IIb  
Integrin alpha-3  
Integrin alpha-5  
Integrin alpha-6  
Integrin alpha-8  
Integrin alpha-9  
Integrin alpha-V  
Integrin beta-1  
Integrin beta-3  
Integrin beta-5  
Integrin beta-6  
Inter-alpha-trypsin inhibitor heavy chain H1  
Inter-alpha-trypsin inhibitor heavy chain H2  
Inter alpha-trypsin inhibitor, heavy chain 4  
Integral membrane protein 2B  
Inosine triphosphate pyrophosphatase  
Inositol 1,4,5-trisphosphate receptor type 1  
Inositol 1,4,5-trisphosphate receptor type 3  
Isovaleryl-CoA dehydrogenase, mitochondrial  
Tyrosine-protein kinase JAK1

Junctophilin-2  
Junction plakoglobin  
KN motif and ankyrin repeat domain-containing protein 2  
Lysine--tRNA ligase  
Katanin p60 ATPase-containing subunit A-like 2  
E3 ubiquitin-protein ligase KCMF1  
Potassium channel subfamily K member 4  
Protein O-glycosyltransferase 3  
Lysine-specific histone demethylase 1B  
3-ketodihydrosphingosine reductase  
KH domain-containing, RNA-binding, signal transduction-associated protein 1  
Far upstream element-binding protein 2  
WASH complex subunit strumpellin  
Kinesin-like protein KIF13A  
Kinesin-like protein KIF3A  
Kinesin heavy chain isoform 5A  
Kinesin-1 heavy chain  
Kinesin light chain 1  
Kallikrein 1-related peptidase b27  
Histone-lysine N-methyltransferase 2A  
Kininogen-1  
Importin subunit alpha-3  
Importin subunit alpha-7  
Importin subunit beta-1  
GTPase KRas  
Keratin, type I cuticular Ha3-I  
Keratin, type II cuticular Hb1  
Keratin, type II cuticular Hb3  
Keratin, type II cuticular Hb5  
Keratin-associated protein 14  
Keratin-associated protein 15-1  
Keratin-associated protein 19-3  
Keratin-associated protein 19-5  
Keratin-associated protein 3-1  
Keratin-associated protein 7-1  
Keratin-associated protein 8-1  
Kinectin  
Trans-L-3-hydroxyproline dehydratase  
Beta-lactamase-like protein 2  
Laminin subunit alpha-2  
Laminin subunit alpha-4

Laminin subunit alpha-5  
Laminin subunit beta-1  
Laminin subunit beta-2  
Laminin subunit gamma-1  
Lysosome-associated membrane glycoprotein 1  
Lysosome-associated membrane glycoprotein 2  
Ragulator complex protein LAMTOR1  
Ragulator complex protein LAMTOR5  
LanC-like protein 2  
Cytosol aminopeptidase  
Leucine--tRNA ligase, cytoplasmic  
LIM and SH3 domain protein 1  
Plastin-2  
LIM domain-binding protein 3  
L-lactate dehydrogenase A chain  
L-lactate dehydrogenase B chain  
Leukocyte cell-derived chemotaxin 1  
LEM domain-containing protein 2  
Prolyl 3-hydroxylase 3  
LETM1 and EF-hand domain-containing protein 1, mitochondrial  
LETM1 domain-containing protein 1  
Galectin-1  
Galectin-3  
Galectin-3-binding protein  
Legumain  
Leukemia inhibitory factor receptor  
LIM and calponin homology domains-containing protein 1  
LIM and senescent cell antigen-like-containing domain protein 1  
LIM and senescent cell antigen-like-containing domain protein 2  
Lysosomal acid lipase/cholesterol ester hydrolase  
Hormone-sensitive lipase  
Protein ERGIC-53  
Vesicular integral-membrane protein VIP36  
LIM and cysteine-rich domains protein 1  
Lipase maturation factor 2  
Prelamin-A/C  
Lamin-B1  
Lamin-B2  
Leiomodulin-1  
Leucyl-cystinyl aminopeptidase  
Lon protease homolog, mitochondrial

Protein-lysine 6-oxidase  
Lysyl oxidase homolog 1  
Lysyl oxidase homolog 3  
Lipoprotein lipase  
Lipoma-preferred partner homolog  
Prolow-density lipoprotein receptor-related protein 1  
Alpha-2-macroglobulin receptor-associated protein  
Leucine-rich PPR motif-containing protein, mitochondrial  
Leucine-rich repeat-containing protein 17  
Leucine-rich repeat-containing protein 39  
Leucine-rich repeat-containing protein 40  
Leucine-rich repeat-containing protein 4C  
Leucine-rich repeat-containing protein 59  
Leucine-rich repeat flightless-interacting protein 1  
U6 snRNA-associated Sm-like protein LSm3  
U6 snRNA-associated Sm-like protein LSm5  
U6 snRNA-associated Sm-like protein LSm7  
Leukotriene A-4 hydrolase  
Latent-transforming growth factor beta-binding protein 1  
Latent-transforming growth factor beta-binding protein 2  
Latent-transforming growth factor beta-binding protein 3  
Latent-transforming growth factor beta-binding protein 4  
Putative RNA-binding protein Luc7-like 2  
Luc7-like protein 3  
Lumican  
Latexin  
Lymphocyte antigen 6A-2/6E-1  
Lymphocyte antigen 6C1  
Acyl-protein thioesterase 1  
Acyl-protein thioesterase 2  
LYR motif-containing protein 5  
Cation-dependent mannose-6-phosphate receptor  
Microtubule-actin cross-linking factor 1  
O-acetyl-ADP-ribose deacetylase MACROD1  
Alpha-mannosidase 2C1  
Mesencephalic astrocyte-derived neurotrophic factor  
Amine oxidase [flavin-containing] A  
Amine oxidase [flavin-containing] B  
Microtubule-associated protein 1A  
Microtubule-associated protein 1B  
Microtubule-associated proteins 1A/1B light chain 3A

Microtubule-associated proteins 1A/1B light chain 3B  
Microtubule-associated protein 1S  
Dual specificity mitogen-activated protein kinase kinase 1  
Dual specificity mitogen-activated protein kinase kinase 3  
Dual specificity mitogen-activated protein kinase kinase 4  
Mitogen-activated protein kinase kinase kinase 19  
Microtubule-associated protein 4  
Microtubule-associated protein 6  
MAP7 domain-containing protein 1  
Mitogen-activated protein kinase 1  
Mitogen-activated protein kinase 14  
Mitogen-activated protein kinase 3  
Microtubule-associated protein RP/EB family member 1  
Microtubule-associated protein RP/EB family member 2  
Microtubule-associated protein RP/EB family member 3  
Methionine--tRNA ligase, cytoplasmic  
MARVEL domain-containing protein 1  
S-adenosylmethionine synthase isoform type-2  
Matrin-3  
Mitochondrial antiviral-signaling protein  
Myoglobin  
Methyl-CpG-binding domain protein 2  
Mannose-binding protein A  
Mannose-binding protein C  
Muscleblind-like protein 1  
Lysophospholipid acyltransferase 7  
Myelin basic protein  
Cell surface glycoprotein MUC18  
Methylcrotonoyl-CoA carboxylase subunit alpha, mitochondrial  
Methylcrotonoyl-CoA carboxylase beta chain, mitochondrial  
Methylmalonyl-CoA epimerase, mitochondrial  
Multiple coagulation factor deficiency protein 2 homolog  
Mast cell protease 3  
Mast cell protease 4  
Calcium uniporter protein, mitochondrial  
Malate dehydrogenase, cytoplasmic  
Malate dehydrogenase, mitochondrial  
Magnesium-dependent phosphatase 1  
NADP-dependent malic enzyme  
Methyl-CpG-binding protein 2  
Trans-2-enoyl-CoA reductase, mitochondrial

Multiple epidermal growth factor-like domains protein 6  
Protein MEMO1  
Methionine aminopeptidase 2  
Microfibrillar-associated protein 2  
Microfibril-associated glycoprotein 4  
Microfibrillar-associated protein 5  
Lactadherin  
Mitofusin-2  
Monoglyceride lipase  
Matrix Gla protein  
Microsomal glutathione S-transferase 1  
Microsomal glutathione S-transferase 3  
Protein-methionine sulfoxide oxidase MICAL1  
Protein-methionine sulfoxide oxidase MICAL2  
MICAL-like protein 1  
Macrophage migration inhibitory factor  
MICOS complex subunit Mic10  
Malectin  
Methylmalonic aciduria type A homolog, mitochondrial  
Membrane magnesium transporter 1  
MMS19 nucleotide excision repair protein homolog  
Meiosis-specific nuclear structural protein 1  
Mannosyl-oligosaccharide glucosidase  
6.8 kDa mitochondrial proteolipid  
Mitochondrial pyruvate carrier 1  
Mitochondrial pyruvate carrier 2  
55 kDa erythrocyte membrane protein  
3-mercaptopyruvate sulfurtransferase  
Myelin protein P0  
Macrophage mannose receptor 1  
C-type mannose receptor 2  
Mas-related G-protein coupled receptor member F  
Methylthioribose-1-phosphate isomerase  
39S ribosomal protein L12, mitochondrial  
28S ribosomal protein S36, mitochondrial  
Protein MRVI1  
Moesin  
Mitochondrial peptide methionine sulfoxide reductase  
Methionine-R-sulfoxide reductase B3, mitochondrial  
S-methyl-5-thioadenosine phosphorylase  
Mitochondrial amidoxime reducing component 2

ATP synthase protein 8  
Mitochondrial carrier homolog 2  
Cytochrome c oxidase subunit 2  
Mitochondrial fission regulator 1-like  
C-1-tetrahydrofolate synthase, cytoplasmic  
Monofunctional C1-tetrahydrofolate synthase, mitochondrial  
NADH-ubiquinone oxidoreductase chain 4  
NADH-ubiquinone oxidoreductase chain 5  
Serine/threonine-protein kinase mTOR  
Myotrophin  
Metaxin-1  
Metaxin-2  
Murinoglobulin-1  
Major urinary protein 1  
Methylmalonyl-CoA mutase, mitochondrial  
Major vault protein  
Myeloid-associated differentiation marker  
Myb-binding protein 1A  
C-Myc-binding protein  
Myeloid differentiation primary response protein MyD88  
UPF0160 protein MYG1, mitochondrial  
Myosin-10  
Myosin-11  
Myosin-11  
Myosin-14  
Myosin-4  
Myosin-9  
Myosin light chain 1/3, skeletal muscle isoform  
Myosin regulatory light chain 12B  
Myosin light polypeptide 6  
Myosin light polypeptide 6  
Myosin regulatory light polypeptide 9  
Myosin light chain kinase, smooth muscle  
Unconventional myosin-XVIIIa  
Unconventional myosin-Ia  
Unconventional myosin-Ic  
Unconventional myosin-I d  
Unconventional myosin-IXb  
Myoferlin  
Ig kappa chain V-III region PC 7210  
Ig heavy chain V region MOPC 47A



Ig gamma-2A chain C region secreted form  
Ig alpha chain C region  
Ig gamma-3 chain C region  
UPF0600 protein C5orf51 homolog  
Uncharacterized protein C1orf198 homolog  
Ester hydrolase C11orf54 homolog

N-alpha-acetyltransferase 15, NatA auxiliary subunit  
N-acetylated-alpha-linked acidic dipeptidase 2  
Nascent polypeptide-associated complex subunit alpha  
NEDD8-activating enzyme E1 regulatory subunit  
Alpha-N-acetylgalactosaminidase  
Nicotinamide phosphoribosyltransferase  
Nucleosome assembly protein 1-like 1  
Nucleosome assembly protein 1-like 4  
Alpha-soluble NSF attachment protein  
Gamma-soluble NSF attachment protein  
Nicotinate phosphoribosyltransferase  
Asparagine--tRNA ligase, cytoplasmic  
Neurocalcin-delta  
Neural cell adhesion molecule 1  
Neutral cholesterol ester hydrolase 1  
Nck-associated protein 1  
Nucleolin  
Nicalin  
Protein NDRG1  
Protein NDRG2  
NADH dehydrogenase [ubiquinone] 1 alpha subcomplex subunit 1  
NADH dehydrogenase [ubiquinone] 1 alpha subcomplex subunit 10, mitochondrial  
NADH dehydrogenase [ubiquinone] 1 alpha subcomplex subunit 11  
NADH dehydrogenase [ubiquinone] 1 alpha subcomplex subunit 12  
NADH dehydrogenase [ubiquinone] 1 alpha subcomplex subunit 13  
NADH dehydrogenase [ubiquinone] 1 alpha subcomplex subunit 2  
NADH dehydrogenase [ubiquinone] 1 alpha subcomplex subunit 3  
Cytochrome c oxidase subunit NDUF4  
NADH dehydrogenase [ubiquinone] 1 alpha subcomplex subunit 5  
NADH dehydrogenase [ubiquinone] 1 alpha subcomplex subunit 6  
NADH dehydrogenase [ubiquinone] 1 alpha subcomplex subunit 8  
NADH dehydrogenase [ubiquinone] 1 alpha subcomplex subunit 9, mitochondrial  
NADH dehydrogenase [ubiquinone] 1 alpha subcomplex assembly factor 4  
NADH dehydrogenase [ubiquinone] complex I, assembly factor 7

NADH dehydrogenase [ubiquinone] 1 beta subcomplex subunit 1  
NADH dehydrogenase [ubiquinone] 1 beta subcomplex subunit 10  
NADH dehydrogenase [ubiquinone] 1 beta subcomplex subunit 3  
NADH dehydrogenase [ubiquinone] 1 beta subcomplex subunit 4  
NADH dehydrogenase [ubiquinone] 1 beta subcomplex subunit 5, mitochondrial  
NADH dehydrogenase [ubiquinone] 1 beta subcomplex subunit 6  
NADH dehydrogenase [ubiquinone] 1 beta subcomplex subunit 7  
NADH dehydrogenase [ubiquinone] 1 beta subcomplex subunit 9  
NADH dehydrogenase [ubiquinone] 1 subunit C2  
NADH-ubiquinone oxidoreductase 75 kDa subunit, mitochondrial  
NADH dehydrogenase [ubiquinone] iron-sulfur protein 2, mitochondrial  
NADH dehydrogenase [ubiquinone] iron-sulfur protein 3, mitochondrial  
NADH dehydrogenase [ubiquinone] iron-sulfur protein 4, mitochondrial  
NADH dehydrogenase [ubiquinone] iron-sulfur protein 5  
NADH dehydrogenase [ubiquinone] iron-sulfur protein 6, mitochondrial  
NADH dehydrogenase [ubiquinone] iron-sulfur protein 7, mitochondrial  
NADH dehydrogenase [ubiquinone] iron-sulfur protein 8, mitochondrial  
NADH dehydrogenase [ubiquinone] flavoprotein 1, mitochondrial  
NADH dehydrogenase [ubiquinone] flavoprotein 2, mitochondrial  
NADH dehydrogenase [ubiquinone] flavoprotein 3, mitochondrial  
LIM zinc-binding domain-containing Nebulette  
E3 ubiquitin-protein ligase NEDD4  
NEDD8  
Neurofilament medium polypeptide  
Negative elongation factor D  
Nestin  
Nexilin  
Nuclear factor 1 B-type  
Nuclear factor 1 C-type  
Nuclear factor 1 X-type  
NFU1 iron-sulfur cluster scaffold homolog, mitochondrial  
Ephexin-1  
NHP2-like protein 1  
Nidogen-1  
Nidogen-2  
NIF3-like protein 1  
Ninjurin-1  
Nitrilase homolog 1  
Omega-amidase NIT2  
NLR family member X1  
Nucleoside diphosphate kinase A

Nucleoside diphosphate kinase B  
Nucleoside diphosphate kinase 3  
NmrA-like family domain-containing protein 1  
Glycylpeptide N-tetradecanoyltransferase 1  
NAD(P) transhydrogenase, mitochondrial  
Non-POU domain-containing octamer-binding protein  
Nucleolar protein 58  
Neurogenic locus notch homolog protein 3  
Protein NOV homolog  
Probable aminopeptidase NPEPL1  
Puromycin-sensitive aminopeptidase  
Nucleophosmin  
Nephronectin  
Nephronectin  
Neuroplastin  
NAD(P)H dehydrogenase [quinone] 1  
Ribosyldihydronicotinamide dehydrogenase [quinone]  
Vesicle-fusing ATPase  
NSFL1 cofactor p47  
5(3)-deoxyribonucleotidase, cytosolic type  
5-nucleotidase  
Netrin-1  
Nucleobindin-1  
Nucleobindin-2  
Nuclear migration protein nudC  
Diphosphoinositol polyphosphate phosphohydrolase 3-beta  
U8 snoRNA-decapping enzyme  
8-oxo-dGDP phosphatase NUDT18  
Cleavage and polyadenylation specificity factor subunit 5  
Nucleoside diphosphate-linked moiety X motif 6  
Peroxisomal coenzyme A diphosphatase NUDT7  
Nuclear mitotic apparatus protein 1  
Nuclear pore complex protein Nup133  
Nuclear pore complex protein Nup155  
Nuclear pore complex protein Nup160  
Nuclear pore complex protein Nup93  
Nuclear transport factor 2  
Protein NYNRIN  
Ornithine aminotransferase, mitochondrial  
OCIA domain-containing protein 1  
2-oxoglutarate dehydrogenase, mitochondrial

Mimecan  
Obg-like ATPase 1  
Osteomodulin  
Dynammin-like 120 kDa protein, mitochondrial  
Alpha-1-acid glycoprotein 1  
Oxysterol-binding protein 1  
Oxysterol-binding protein-related protein 11  
Oxysterol-binding protein-related protein 3  
Oxysterol-binding protein-related protein 9  
Probable tRNA N6-adenosine threonylcarbamoyltransferase  
Oligosaccharyltransferase complex subunit OSTC  
Osteoclast-stimulating factor 1  
Ubiquitin thioesterase OTUB1  
Succinyl-CoA:3-ketoacid coenzyme A transferase 1, mitochondrial  
Serine/threonine-protein kinase OSR1  
Protein disulfide-isomerase  
Proliferation-associated protein 2G4  
Polyadenylate-binding protein 1  
Polyadenylate-binding protein 2  
Protein kinase C and casein kinase substrate in neurons protein 2  
Platelet-activating factor acetylhydrolase IB subunit alpha  
Platelet-activating factor acetylhydrolase IB subunit beta  
Multifunctional protein ADE2  
Serine/threonine-protein kinase PAK 2  
Palladin  
Paralemmin-1  
Peroxisomal N(1)-acetyl-spermine/spermidine oxidase  
Papilin  
Bifunctional 3-phosphoadenosine 5-phosphosulfate synthase 2  
Protein deglycase DJ-1  
Poly [ADP-ribose] polymerase 12

Alpha-parvin  
Beta-parvin  
PRKC apoptosis WT1 regulator protein  
Protein polybromo-1  
Pre-B-cell leukemia transcription factor-interacting protein 1  
Pyruvate carboxylase, mitochondrial  
Poly(rC)-binding protein 1  
Poly(rC)-binding protein 2  
Propionyl-CoA carboxylase alpha chain, mitochondrial

Propionyl-CoA carboxylase beta chain, mitochondrial  
Phosphoenolpyruvate carboxykinase [GTP], mitochondrial  
Protein-L-isoaspartate(D-aspartate) O-methyltransferase  
Procollagen C-endopeptidase enhancer 1  
Prenylcysteine oxidase  
Prenylcysteine oxidase-like  
Choline-phosphate cytidyltransferase A  
Programmed cell death protein 10  
Programmed cell death protein 5  
Programmed cell death protein 6  
Programmed cell death 6-interacting protein  
Parkinson disease 7 domain-containing protein 1  
cGMP-inhibited 3,5-cyclic phosphodiesterase A  
cGMP-specific 3,5-cyclic phosphodiesterase  
Platelet-derived growth factor receptor beta  
Pyruvate dehydrogenase E1 component subunit alpha, somatic form, mitochondrial  
Pyruvate dehydrogenase E1 component subunit beta, mitochondrial  
Pyruvate dehydrogenase protein X component, mitochondrial  
Protein disulfide-isomerase A3  
Protein disulfide-isomerase A4  
Protein disulfide-isomerase A5  
Protein disulfide-isomerase A6  
[Pyruvate dehydrogenase (acetyl-transferring)] kinase isozyme 1, mitochondrial  
[Pyruvate dehydrogenase (acetyl-transferring)] kinase isozyme 2, mitochondrial  
[Pyruvate dehydrogenase (acetyl-transferring)] kinase isozyme 3, mitochondrial  
PDZ and LIM domain protein 1  
PDZ and LIM domain protein 3  
PDZ and LIM domain protein 4  
PDZ and LIM domain protein 5  
PDZ and LIM domain protein 7  
[Pyruvate dehydrogenase [acetyl-transferring]]-phosphatase 1, mitochondrial  
Sister chromatid cohesion protein PDS5 homolog A  
Sister chromatid cohesion protein PDS5 homolog B  
Decaprenyl-diphosphate synthase subunit 2  
Pyridoxal-dependent decarboxylase domain-containing protein 1  
Pyridoxal kinase  
Astrocytic phosphoprotein PEA-15  
Phosphatidylethanolamine-binding protein 1  
Platelet endothelial cell adhesion molecule  
Peflin  
Xaa-Pro dipeptidase

Peroxisomal biogenesis factor 19  
Peroxisomal targeting signal 1 receptor  
Platelet factor 4  
Prefoldin subunit 2  
Prefoldin subunit 5  
Prefoldin subunit 6  
ATP-dependent 6-phosphofructokinase, liver type  
ATP-dependent 6-phosphofructokinase, muscle type  
ATP-dependent 6-phosphofructokinase, platelet type  
Profilin-1  
Phosphoglycerate mutase 1  
6-phosphogluconate dehydrogenase, decarboxylating  
Phosphoglycerate kinase 1  
6-phosphogluconolactonase  
Phosphoglucomutase-1  
Phosphoglucomutase-2  
Phosphoacetylglucosamine mutase  
Phosphoglucomutase-like protein 5  
Phosphoglycolate phosphatase  
Membrane-associated progesterone receptor component 1  
Membrane-associated progesterone receptor component 2  
Prohibitin  
Prohibitin-2  
D-3-phosphoglycerate dehydrogenase  
Phytanoyl-CoA dioxygenase domain-containing protein 1  
Peptidase inhibitor 15  
Phosphatidylinositol 4-kinase alpha  
Phosphatidylinositol-binding clathrin assembly protein  
GPI transamidase component PIG-S  
Phosphatidylinositol 3-kinase regulatory subunit alpha  
Peptidyl-prolyl cis-trans isomerase NIMA-interacting 1  
Phosphatidylinositol 5-phosphate 4-kinase type-2 alpha  
Pirin  
Phosphatidylinositol transfer protein alpha isoform  
Phosphatidylinositol transfer protein beta isoform  
Presequence protease, mitochondrial  
Pyruvate kinase PKM  
Pyruvate kinase PKM  
Serine/threonine-protein kinase N1  
HRAS-like suppressor 3  
Cytosolic phospholipase A2

1-phosphatidylinositol 4,5-bisphosphate phosphodiesterase beta-1  
1-phosphatidylinositol 4,5-bisphosphate phosphodiesterase beta-3  
1-phosphatidylinositol 4,5-bisphosphate phosphodiesterase delta-1  
Plectin  
Plasminogen  
Perilipin-1  
Perilipin-3  
Perilipin-4  
Procollagen-lysine,2-oxoglutarate 5-dioxygenase 3  
Proteolipid protein 2  
Plastin-3  
Phospholipid scramblase 3  
Plexin domain-containing protein 2  
Plexin-B2  
Protein PML  
Mitochondrial-processing peptidase subunit alpha  
Pinin  
Purine nucleoside phosphorylase  
Podocan  
GDP-fucose protein O-fucosyltransferase 2  
Protein O-glucosyltransferase 1  
DNA-directed RNA polymerases I, II, and III subunit RPABC3  
Serum paraoxonase/arylesterase 1  
Serum paraoxonase/arylesterase 2  
Serum paraoxonase/lactonase 3  
NADPH--cytochrome P450 reductase  
Periostin  
Periostin  
Inorganic pyrophosphatase  
Inorganic pyrophosphatase 2, mitochondrial  
Peptidyl-prolyl cis-trans isomerase A  
Peptidyl-prolyl cis-trans isomerase B  
Peptidyl-prolyl cis-trans isomerase C  
Peptidyl-prolyl cis-trans isomerase D  
Periplakin  
Protein phosphatase 1B  
Protein phosphatase methylesterase 1  
Serine/threonine-protein phosphatase PP1-alpha catalytic subunit  
Serine/threonine-protein phosphatase PP1-beta catalytic subunit  
Serine/threonine-protein phosphatase PP1-gamma catalytic subunit  
Protein phosphatase 1 regulatory subunit 12A

Protein phosphatase 1 regulatory subunit 12B  
Protein phosphatase 1 regulatory subunit 12C  
Protein phosphatase 1 regulatory subunit 14A  
Protein phosphatase 1 regulatory subunit 7  
Serine/threonine-protein phosphatase 2A catalytic subunit alpha isoform  
Serine/threonine-protein phosphatase 2A 65 kDa regulatory subunit A alpha isoform  
Serine/threonine-protein phosphatase 2A 55 kDa regulatory subunit B alpha isoform  
Serine/threonine-protein phosphatase 2A activator  
Serine/threonine-protein phosphatase 2A 56 kDa regulatory subunit alpha isoform  
Serine/threonine-protein phosphatase 2A 56 kDa regulatory subunit gamma isoform  
Serine/threonine-protein phosphatase 6 catalytic subunit  
Serine/threonine-protein phosphatase 6 regulatory subunit 3  
Palmitoyl-protein thioesterase 1  
PRA1 family protein 2  
Peroxiredoxin-1  
Peroxiredoxin-2  
Thioredoxin-dependent peroxide reductase, mitochondrial  
Peroxiredoxin-4  
Peroxiredoxin-5, mitochondrial  
Peroxiredoxin-6  
Prolargin  
Prolyl endopeptidase  
5-AMP-activated protein kinase catalytic subunit alpha-1  
cAMP-dependent protein kinase catalytic subunit alpha  
5-AMP-activated protein kinase subunit gamma-1  
cAMP-dependent protein kinase type I-alpha regulatory subunit  
cAMP-dependent protein kinase type II-alpha regulatory subunit  
cAMP-dependent protein kinase type II-beta regulatory subunit  
Protein kinase C alpha type  
Protein kinase C delta type  
Protein kinase C delta-binding protein  
Glucosidase 2 subunit beta  
cGMP-dependent protein kinase 1  
Interferon-inducible double-stranded RNA-dependent protein kinase activator A  
Vitamin K-dependent protein C  
Endothelial protein C receptor  
Proline synthase co-transcribed bacterial homolog protein  
Pre-mRNA-processing factor 19  
Pre-mRNA-processing-splicing factor 8  
Peripherin  
Ribose-phosphate pyrophosphokinase 1



Phosphoribosyl pyrophosphate synthase-associated protein 1

Protein PRRC1

Prosaposin

PC4 and SFRS1-interacting protein

Proteasome subunit alpha type-1

Proteasome subunit alpha type-2

Proteasome subunit alpha type-3

Proteasome subunit alpha type-4

Proteasome subunit alpha type-5

Proteasome subunit alpha type-6

Proteasome subunit alpha type-7

Proteasome subunit beta type-1

Proteasome subunit beta type-2

Proteasome subunit beta type-3

Proteasome subunit beta type-4

Proteasome subunit beta type-5

Proteasome subunit beta type-6

Proteasome subunit beta type-7

26S protease regulatory subunit 4

26S protease regulatory subunit 7

26S protease regulatory subunit 6A

26S protease regulatory subunit 6B

26S protease regulatory subunit 8

26S protease regulatory subunit 10B

26S proteasome non-ATPase regulatory subunit 1

26S proteasome non-ATPase regulatory subunit 11

26S proteasome non-ATPase regulatory subunit 12

26S proteasome non-ATPase regulatory subunit 13

26S proteasome non-ATPase regulatory subunit 14

26S proteasome non-ATPase regulatory subunit 2

26S proteasome non-ATPase regulatory subunit 3

26S proteasome non-ATPase regulatory subunit 4

26S proteasome non-ATPase regulatory subunit 5

26S proteasome non-ATPase regulatory subunit 6

26S proteasome non-ATPase regulatory subunit 7

26S proteasome non-ATPase regulatory subunit 8

26S proteasome non-ATPase regulatory subunit 9

Proteasome activator complex subunit 1

Proteasome activator complex subunit 2

Proteasome assembly chaperone 1

Polypyrimidine tract-binding protein 1

Polypyrimidine tract-binding protein 2  
Pentatricopeptide repeat domain-containing protein 3, mitochondrial  
Phosphotriesterase-related protein  
Prostaglandin E synthase 2  
Prostaglandin E synthase 3  
Prostaglandin F2 receptor negative regulator  
Prostacyclin synthase  
Prostaglandin reductase 1  
Prostaglandin reductase 2  
Prostaglandin G/H synthase 1  
Parathymsin  
Protein tyrosine phosphatase type IVA 2  
Tyrosine-protein phosphatase non-receptor type 11  
Tyrosine-protein phosphatase non-receptor type 12  
Tyrosine-protein phosphatase non-receptor type 23  
Receptor-type tyrosine-protein phosphatase C  
Polymerase I and transcript release factor  
Peptidyl-tRNA hydrolase 2, mitochondrial  
Poly(U)-binding-splicing factor PUF60  
Transcriptional activator protein Pur-alpha  
Peroxisin homolog  
Paxillin  
Glycogen phosphorylase, brain form  
Glycogen phosphorylase, liver form  
Glycogen phosphorylase, muscle form  
Glutamine-tRNA ligase  
Dihydropteridine reductase  
Protein QIL1  
Protein quaking  
Ras-related protein Rab-10  
Ras-related protein Rab-11B  
Ras-related protein Rab-12  
Ras-related protein Rab-14  
Ras-related protein Rab-18  
Ras-related protein Rab-1A  
Ras-related protein Rab-1B  
Ras-related protein Rab-21  
Ras-related protein Rab-27B  
Ras-related protein Rab-2A  
Ras-related protein Rab-34  
Ras-related protein Rab-35

Ras-related protein Rab-5A  
Ras-related protein Rab-5B  
Ras-related protein Rab-5C  
Ras-related protein Rab-6B  
Ras-related protein Rab-7a  
Ras-related protein Rab-8A  
Ras-related protein Rab-8B  
Ras-related C3 botulinum toxin substrate 1  
UV excision repair protein RAD23 homolog B  
Ras-related protein Ral-A  
RNA-binding protein Raly  
GTP-binding nuclear protein Ran  
Ran-specific GTPase-activating protein  
E3 SUMO-protein ligase RanBP2  
Ran GTPase-activating protein 1  
Ras-related protein Rap-1A  
Ras-related protein Rap-1b  
Ras-related protein Rap-2c  
Retinoic acid receptor responder protein 2  
Arginine--tRNA ligase, cytoplasmic  
Ribonucleoprotein PTB-binding 1  
Histone-binding protein RBBP4  
Histone-binding protein RBBP7  
Putative hydrolase RBBP9  
RNA-binding protein 14  
Probable RNA-binding protein 19  
RNA-binding protein 25  
RNA-binding protein 3  
RNA-binding protein 39  
RNA binding motif protein, X-linked-like-1  
Retinol-binding protein 1  
Retinol-binding protein 4  
RNA-binding protein with multiple splicing  
RNA-binding protein with multiple splicing 2  
Regulator of chromosome condensation  
Reticulocalbin-2  
Reticulocalbin-3  
Retinol dehydrogenase 11  
Retinol dehydrogenase 14  
Radixin  
Receptor expression-enhancing protein 5

Oligoribonuclease, mitochondrial  
Regulator of G-protein signaling 18  
Transforming protein RhoA  
Rho-related GTP-binding protein RhoB  
Rho-related GTP-binding protein RhoC  
Rho-related GTP-binding protein RhoQ  
Mitochondrial Rho GTPase 1  
RILP-like protein 1  
Regulator of microtubule dynamics protein 1  
Regulator of microtubule dynamics protein 3  
Ribonuclease 4  
Ribonuclease inhibitor  
Aminopeptidase B  
Rho-associated protein kinase 1  
Rho-associated protein kinase 2  
Replication protein A 32 kDa subunit  
Ribulose-phosphate 3-epimerase  
60S ribosomal protein L10  
60S ribosomal protein L10a  
60S ribosomal protein L11  
60S ribosomal protein L12  
60S ribosomal protein L13  
60S ribosomal protein L13a  
60S ribosomal protein L14  
60S ribosomal protein L15  
60S ribosomal protein L17  
60S ribosomal protein L18  
60S ribosomal protein L18a  
60S ribosomal protein L19  
60S ribosomal protein L21  
60S ribosomal protein L22  
60S ribosomal protein L23  
60S ribosomal protein L23a  
60S ribosomal protein L24  
60S ribosomal protein L26  
60S ribosomal protein L27  
60S ribosomal protein L27a  
60S ribosomal protein L28  
60S ribosomal protein L29  
60S ribosomal protein L3  
60S ribosomal protein L30

60S ribosomal protein L31  
60S ribosomal protein L32  
60S ribosomal protein L34  
60S ribosomal protein L35  
60S ribosomal protein L35a  
60S ribosomal protein L36  
60S ribosomal protein L37a  
60S ribosomal protein L38  
60S ribosomal protein L39  
60S ribosomal protein L4  
60S ribosomal protein L5  
60S ribosomal protein L6  
60S ribosomal protein L7  
60S ribosomal protein L7a  
60S ribosomal protein L8  
60S ribosomal protein L9  
60S acidic ribosomal protein P0  
60S acidic ribosomal protein P1  
60S acidic ribosomal protein P2  
Dolichyl-diphosphooligosaccharide--protein glycosyltransferase subunit 1  
Dolichyl-diphosphooligosaccharide--protein glycosyltransferase subunit 2  
40S ribosomal protein S10  
40S ribosomal protein S11  
40S ribosomal protein S12  
40S ribosomal protein S13  
40S ribosomal protein S14  
40S ribosomal protein S15  
40S ribosomal protein S15a  
40S ribosomal protein S16  
40S ribosomal protein S17  
40S ribosomal protein S18  
40S ribosomal protein S19  
40S ribosomal protein S2  
40S ribosomal protein S20  
40S ribosomal protein S21  
40S ribosomal protein S23  
40S ribosomal protein S24  
40S ribosomal protein S25  
40S ribosomal protein S26  
Ubiquitin-40S ribosomal protein S27a  
40S ribosomal protein S27-like

40S ribosomal protein S28  
40S ribosomal protein S29  
40S ribosomal protein S3  
40S ribosomal protein S3a  
40S ribosomal protein S4, X isoform  
40S ribosomal protein S5  
40S ribosomal protein S6  
Ribosomal protein S6 kinase alpha-3  
40S ribosomal protein S7  
40S ribosomal protein S8  
40S ribosomal protein S9  
40S ribosomal protein SA  
Regulatory-associated protein of mTOR  
GTP-binding protein RAD  
Ras-related protein R-Ras  
Ribosome-binding protein 1  
Ras suppressor protein 1  
RNA 3-terminal phosphate cyclase  
tRNA-splicing ligase RtcB homolog  
Reticulon-1  
Reticulon-2  
Reticulon-3  
Reticulon-4  
Reticulon-4  
RNA transcription, translation and transport factor protein  
RUN and FYVE domain-containing protein 1  
RuvB-like 1  
Ryanodine receptor 1  
Protein S100-A1  
Protein S100-A10  
Protein S100-A11  
Protein S100-A13  
Protein S100-A3  
Protein S100-A4  
Protein S100-A5  
Protein S100-A6  
Protein SAAL1  
Phosphatidylinositide phosphatase SAC1  
SUMO-activating enzyme subunit 1  
Scaffold attachment factor B2  
Deoxynucleoside triphosphate triphosphohydrolase SAMHD1

Sorting and assembly machinery component 50 homolog  
GTP-binding protein SAR1a  
GTP-binding protein SAR1b  
Serine--tRNA ligase, cytoplasmic  
Secretory carrier-associated membrane protein 1  
Scavenger receptor class A member 5  
Lysosome membrane protein 2  
Saccharopine dehydrogenase-like oxidoreductase  
Sec1 family domain-containing protein 1  
Short coiled-coil protein  
Non-specific lipid-transfer protein  
Retinoid-inducible serine carboxypeptidase  
Secernin-1  
Secernin-2  
Signal peptide, CUB and EGF-like domain-containing protein 3  
Succinate dehydrogenase [ubiquinone] flavoprotein subunit, mitochondrial  
Succinate dehydrogenase [ubiquinone] iron-sulfur subunit, mitochondrial  
Succinate dehydrogenase cytochrome b560 subunit, mitochondrial  
Succinate dehydrogenase [ubiquinone] cytochrome b small subunit, mitochondrial  
Serum deprivation-response protein  
Signal peptidase complex catalytic subunit SEC11A  
Protein SEC13 homolog  
Vesicle-trafficking protein SEC22b  
Protein transport protein Sec23A  
Protein transport protein Sec23B  
SEC23-interacting protein  
Protein transport protein Sec31A  
Protein transport protein Sec31B  
Protein transport protein Sec61 subunit alpha isoform 1  
Selenium-binding protein 1  
Selenoprotein M  
Selenoprotein O  
Selenoprotein T  
Selenide, water dikinase 1  
Selenoprotein P  
Septin-11  
Septin-2  
Septin-5  
Septin-6  
Septin-7  
Septin-8

Septin-9  
Plasminogen activator inhibitor 1 RNA-binding protein  
Alpha-1-antitrypsin 1-1  
Alpha-1-antitrypsin 1-2  
Alpha-1-antitrypsin 1-3  
Alpha-1-antitrypsin 1-4  
Alpha-1-antitrypsin 1-5  
Serine protease inhibitor A3K  
Serine protease inhibitor A3M  
Serine protease inhibitor A3N  
Corticosteroid-binding globulin  
Leukocyte elastase inhibitor A  
Serpine B6  
Antithrombin-III  
Heparin cofactor 2  
Glia-derived nexin  
Pigment epithelium-derived factor  
Alpha-2-antiplasmin  
Plasma protease C1 inhibitor  
Serpine H1  
Protein SET  
Histone-lysine N-methyltransferase SETD7  
Splicing factor 1  
Splicing factor 3A subunit 1  
Splicing factor 3A subunit 2  
Splicing factor 3B subunit 1  
Splicing factor 3B subunit 3  
Splicing factor 3B subunit 4  
14-3-3 protein sigma  
Splicing factor, proline- and glutamine-rich  
Secreted frizzled-related protein 1  
Sideroflexin-1  
Sideroflexin-3  
Alpha-sarcoglycan  
Beta-sarcoglycan  
Delta-sarcoglycan  
Epsilon-sarcoglycan  
Gamma-sarcoglycan  
Sphingosine-1-phosphate lyase 1  
Small glutamine-rich tetratricopeptide repeat-containing protein alpha  
SH3 domain-binding glutamic acid-rich-like protein



SH3 domain-binding glutamic acid-rich-like protein 3  
SH3 domain-containing protein 21  
Endophilin-A2  
Endophilin-B1  
Endophilin-B2  
SH3 and PX domain-containing protein 2A  
Serine hydroxymethyltransferase  
Single-minded homolog 2  
NAD-dependent protein deacetylase sirtuin-2  
Superkiller viralicidic activity 2-like 2  
S-phase kinase-associated protein 1  
Solute carrier family 12 member 6  
Neutral amino acid transporter B(0)  
Tricarboxylate transport protein, mitochondrial  
Mitochondrial dicarboxylate carrier  
Mitochondrial 2-oxoglutarate/malate carrier protein  
Calcium-binding mitochondrial carrier protein Aralar1  
Mitochondrial carnitine/acylcarnitine carrier protein  
Calcium-binding mitochondrial carrier protein SCaMC-1  
Phosphate carrier protein, mitochondrial  
ADP/ATP translocase 1  
Mitochondrial coenzyme A transporter SLC25A42  
ADP/ATP translocase 2  
Solute carrier family 25 member 51  
Long-chain fatty acid transport protein 1  
Equilibrative nucleoside transporter 1  
Solute carrier family 2, facilitated glucose transporter member 1  
4F2 cell-surface antigen heavy chain  
Choline transporter-like protein 2  
Band 3 anion transport protein  
Sodium bicarbonate cotransporter 3  
Slit homolog 3 protein  
Sarcolemmal membrane-associated protein  
Probable global transcription activator SNF2L2  
SWI/SNF-related matrix-associated actin-dependent regulator of chromatin subfamily A mem  
SWI/SNF complex subunit SMARCC2  
Structural maintenance of chromosomes protein 1A  
Structural maintenance of chromosomes protein 3  
Essential MCU regulator, mitochondrial  
SPARC-related modular calcium-binding protein 1  
Sphingomyelin phosphodiesterase 4

Acid sphingomyelinase-like phosphodiesterase 3a  
Acid sphingomyelinase-like phosphodiesterase 3b  
Smoothelin  
WD40 repeat-containing protein SMU1  
Gamma-synuclein  
Staphylococcal nuclease domain-containing protein 1  
U5 small nuclear ribonucleoprotein 200 kDa helicase  
U1 small nuclear ribonucleoprotein 70 kDa  
U1 small nuclear ribonucleoprotein A  
Small nuclear ribonucleoprotein-associated protein B  
U2 small nuclear ribonucleoprotein B  
Small nuclear ribonucleoprotein Sm D1  
Small nuclear ribonucleoprotein Sm D3  
Small nuclear ribonucleoprotein E  
Small nuclear ribonucleoprotein F  
Small nuclear ribonucleoprotein G  
Alpha-1-syntrophin  
Beta-1-syntrophin  
Beta-2-syntrophin  
Sorting nexin-1  
Sorting nexin-12  
Sorting nexin-17  
Sorting nexin-18  
Sorting nexin-2  
Sorting nexin-3  
Sorting nexin-4  
Sorting nexin-5  
Sorting nexin-6  
Sorting nexin-9  
Superoxide dismutase [Cu-Zn]  
Superoxide dismutase [Mn], mitochondrial  
Extracellular superoxide dismutase [Cu-Zn]  
Sorbin and SH3 domain-containing protein 1  
Sorbin and SH3 domain-containing protein 2  
Vinexin  
Sorbitol dehydrogenase  
Sclerostin  
C-Jun-amino-terminal kinase-interacting protein 4  
SPARC  
SPARC-like protein 1  
Signal peptidase complex subunit 2

Spondin-1  
Sepiapterin reductase  
Spectrin alpha chain, erythrocytic 1  
Spectrin alpha chain, non-erythrocytic 1  
Spectrin beta chain, erythrocytic  
Spectrin beta chain, non-erythrocytic 1  
Sulfide:quinone oxidoreductase, mitochondrial  
Sorcin  
Spermidine synthase  
Signal recognition particle 14 kDa protein  
Signal recognition particle 54 kDa protein  
Signal recognition particle receptor subunit alpha  
Sushi-repeat-containing protein SRPX  
Serine/arginine repetitive matrix protein 1  
Serrate RNA effector molecule homolog  
Serine/arginine-rich splicing factor 1  
Serine/arginine-rich splicing factor 10  
Serine/arginine-rich splicing factor 2  
Serine/arginine-rich splicing factor 3  
Serine/arginine-rich splicing factor 6  
Serine/arginine-rich splicing factor 7  
Lupus La protein homolog  
Single-stranded DNA-binding protein, mitochondrial  
Sarcospan  
Translocon-associated protein subunit alpha  
Translocon-associated protein subunit delta  
Hsc70-interacting protein  
Lactosylceramide alpha-2,3-sialyltransferase  
Signal transducer and activator of transcription 3  
Metalloreductase STEAP3  
Stromal interaction molecule 1  
Stress-induced-phosphoprotein 1  
Serine/threonine-protein kinase 24  
STE20/SPS1-related proline-alanine-rich protein kinase  
Erythrocyte band 7 integral membrane protein  
Stomatin-like protein 2, mitochondrial  
Stonin-1  
Serine-threonine kinase receptor-associated protein  
Steryl-sulfatase  
Dolichyl-diphosphooligosaccharide--protein glycosyltransferase subunit STT3A  
Dolichyl-diphosphooligosaccharide--protein glycosyltransferase subunit STT3B

Syntaxin-12  
Syntaxin-16  
Syntaxin-7  
Syntaxin-binding protein 1  
Syntaxin-binding protein 3  
Succinyl-CoA ligase [ADP-forming] subunit beta, mitochondrial  
Succinyl-CoA ligase [ADP/GDP-forming] subunit alpha, mitochondrial  
Succinyl-CoA ligase [GDP-forming] subunit beta, mitochondrial  
Suppressor of G2 allele of SKP1 homolog  
Extracellular sulfatase Sulf-1  
SUN domain-containing protein 1  
SUN domain-containing protein 2  
Sulfite oxidase, mitochondrial  
Surfeit locus protein 4  
Sushi domain-containing protein 2  
Supervillin  
Syncoilin  
Heterogeneous nuclear ribonucleoprotein Q  
Nesprin-1  
Nesprin-2  
Synemin  
Synaptopodin  
Synaptopodin-2  
Transgelin  
Transgelin-2  
Transgelin-3  
Transaldolase  
Tapasin  
TAR DNA-binding protein 43  
Threonine--tRNA ligase, cytoplasmic  
TBC1 domain family member 1  
Tubulin-specific chaperone D  
Transcription elongation factor A protein 1  
Transcription elongation factor B polypeptide 1  
Transcription elongation factor B polypeptide 2  
Transcobalamin-2  
T-complex protein 1 subunit alpha  
Testin  
Serotransferrin  
Transforming growth factor beta-1-induced transcript 1 protein  
Transforming growth factor-beta-induced protein ig-h3

Protein-glutamine gamma-glutamyltransferase 2  
Tyrosine 3-monooxygenase  
Thrombospondin-1  
Thrombospondin type-1 domain-containing protein 4  
THUMP domain-containing protein 1  
Thy-1 membrane glycoprotein  
Mitochondrial import inner membrane translocase subunit Tim13  
Mitochondrial import inner membrane translocase subunit TIM44  
Mitochondrial import inner membrane translocase subunit TIM50  
Metalloproteinase inhibitor 3  
Tubulointerstitial nephritis antigen-like  
Tight junction protein ZO-1  
Transketolase  
Talin-1  
Talin-2  
Transmembrane and coiled-coil domain-containing protein 1  
Transmembrane emp24 domain-containing protein 10  
Transmembrane emp24 domain-containing protein 2  
Transmembrane emp24 domain-containing protein 9  
Transmembrane protein 14C  
Protein kish-A  
Transmembrane protein 256  
Transmembrane protein 43  
Tropomodulin-1  
Tropomodulin-3  
Lamina-associated polypeptide 2, isoforms beta/delta/epsilon/gamma  
Lamina-associated polypeptide 2, isoforms alpha/zeta  
Thymosin beta-10  
Thymosin beta-4  
Transmembrane and TPR repeat-containing protein 3  
Thioredoxin-related transmembrane protein 1  
Thioredoxin-related transmembrane protein 2  
Thioredoxin-related transmembrane protein 4  
Tenascin  
Tumor necrosis factor alpha-induced protein 8  
Transportin-1  
Transportin-2  
Transportin-3  
Tensin-2  
Target of Myb protein 1  
TOM1-like protein 2

Mitochondrial import receptor subunit TOM22 homolog  
Mitochondrial import receptor subunit TOM34  
Mitochondrial import receptor subunit TOM5 homolog  
Mitochondrial import receptor subunit TOM70  
DNA topoisomerase 2-alpha  
DNA topoisomerase 2-beta  
Torsin-1A-interacting protein 1  
Torsin-1A-interacting protein 2  
Torsin-1B  
Torsin-3A  
Tumor protein D52  
Tumor protein D54  
Triosephosphate isomerase  
Tropomyosin alpha-1 chain  
Tropomyosin alpha-3 chain  
Tropomyosin alpha-4 chain  
Tripeptidyl-peptidase 1  
Tubulin polymerization-promoting protein  
Tubulin polymerization-promoting protein family member 3  
Nucleoprotein TPR  
Tumor protein p63-regulated gene 1-like protein  
EKC/KEOPS complex subunit Tprkb  
Translationally-controlled tumor protein  
Heat shock protein 75 kDa, mitochondrial  
Trafficking protein particle complex subunit 2  
Trafficking protein particle complex subunit 3  
Trafficking protein particle complex subunit 6B  
E3 ubiquitin-protein ligase TRIM23  
Transcription intermediary factor 1-beta  
Tripartite motif-containing protein 47  
Triple functional domain protein  
Cdc42-interacting protein 4  
Thyroid receptor-interacting protein 6  
Multifunctional methyltransferase subunit TRM112-like protein  
CCA tRNA nucleotidyltransferase 1, mitochondrial  
Translin  
Translin-associated protein X  
Tetraspanin-4  
Tetraspanin-9  
Translocator protein  
Thiosulfate sulfurtransferase

Tetratricopeptide repeat protein 28  
Tetratricopeptide repeat protein 38  
Tubulin--tyrosine ligase-like protein 12  
Titin  
Transthyretin  
Tubulin alpha-1A chain  
Tubulin alpha-1B chain  
Tubulin alpha-1C chain  
Tubulin alpha-4A chain  
Tubulin beta-2B chain  
Tubulin beta-3 chain  
Tubulin beta-4A chain  
Tubulin beta-4B chain  
Tubulin beta-5 chain  
Tubulin beta-6 chain  
Elongation factor Tu, mitochondrial  
Twincilin-1  
Twincilin-2  
Thioredoxin  
Thioredoxin, mitochondrial  
Thioredoxin domain-containing protein 17  
Thioredoxin domain-containing protein 5  
Thioredoxin-like protein 1  
Thioredoxin reductase 1, cytoplasmic  
Splicing factor U2AF 35 kDa subunit  
Splicing factor U2AF 65 kDa subunit  
UDP-N-acetylhexosamine pyrophosphorylase-like protein 1  
Ubiquitin-like modifier-activating enzyme 1  
SUMO-activating enzyme subunit 2  
NEDD8-activating enzyme E1 catalytic subunit  
Ubiquitin-like modifier-activating enzyme 5  
Ubiquitin-associated protein 2-like  
Ubiquitin-conjugating enzyme E2 D2  
SUMO-conjugating enzyme UBC9  
Ubiquitin-conjugating enzyme E2 K  
Ubiquitin-conjugating enzyme E2 L3  
Ubiquitin-conjugating enzyme E2 N  
Ubiquitin-conjugating enzyme E2 variant 2  
Ubiquitin-protein ligase E3C  
Ubiquitin conjugation factor E4 A  
Ubiquitin conjugation factor E4 B

Ubiquitin-like protein 5  
Ubiquilin-1  
Ubiquilin-2  
E3 ubiquitin-protein ligase UBR4  
UBX domain-containing protein 1  
UBX domain-containing protein 6  
Ubiquitin carboxyl-terminal hydrolase isozyme L1  
Ubiquitin carboxyl-terminal hydrolase isozyme L3  
Mitochondrial brown fat uncoupling protein 1  
Ubiquitin-fold modifier-conjugating enzyme 1  
Ubiquitin fusion degradation protein 1 homolog  
Ubiquitin-fold modifier 1  
UDP-glucose 6-dehydrogenase  
UDP-glucose:glycoprotein glucosyltransferase 1  
UTP--glucose-1-phosphate uridylyltransferase  
UDP-glucuronosyltransferase 1-9  
Uridine 5-monophosphate synthase  
Protein unc-45 homolog A  
Regulator of nonsense transcripts 1  
Cytochrome b-c1 complex subunit 9  
Cytochrome b-c1 complex subunit 10  
Cytochrome b-c1 complex subunit 7  
Cytochrome b-c1 complex subunit 1, mitochondrial  
Cytochrome b-c1 complex subunit 2, mitochondrial  
Cytochrome b-c1 complex subunit Rieske, mitochondrial  
Cytochrome b-c1 complex subunit 6, mitochondrial  
Cytochrome b-c1 complex subunit 8  
Uroporphyrinogen decarboxylase  
Up-regulated during skeletal muscle growth protein 5  
General vesicular transport factor p115  
Ubiquitin carboxyl-terminal hydrolase 14  
Ubiquitin carboxyl-terminal hydrolase 15  
Ubiquitin carboxyl-terminal hydrolase 20  
Ubiquitin carboxyl-terminal hydrolase 4  
Ubiquitin carboxyl-terminal hydrolase 5  
Ubiquitin carboxyl-terminal hydrolase 7  
Probable ubiquitin carboxyl-terminal hydrolase FAF-X  
Protein VAC14 homolog  
Vesicle-associated membrane protein-associated protein A  
Vesicle-associated membrane protein-associated protein B  
Valine--tRNA ligase



Vasorin  
Vasodilator-stimulated phosphoprotein  
Synaptic vesicle membrane protein VAT-1 homolog  
Synaptic vesicle membrane protein VAT-1 homolog-like  
Prefoldin subunit 3  
Versican core protein  
Vinculin  
Transitional endoplasmic reticulum ATPase  
Voltage-dependent anion-selective channel protein 1  
Voltage-dependent anion-selective channel protein 2  
Voltage-dependent anion-selective channel protein 3  
Vimentin  
Vitamin K epoxide reductase complex subunit 1  
Vitamin K epoxide reductase complex subunit 1-like protein 1  
Vacuolar protein-sorting-associated protein 25  
Vacuolar protein sorting-associated protein 26B  
Vacuolar protein sorting-associated protein 28 homolog  
Vacuolar protein sorting-associated protein 29  
Vacuolar protein sorting-associated protein 35  
VPS35 endosomal protein-sorting factor-like  
Vacuolar protein-sorting-associated protein 36  
Vacuolar protein sorting-associated protein 45  
Vacuolar protein sorting-associated protein 4A  
Vacuolar protein sorting-associated protein 4B  
Vacuolar protein sorting-associated protein VTA1 homolog  
Vitronectin  
von Willebrand factor A domain-containing protein 1  
von Willebrand factor A domain-containing protein 5A  
von Willebrand factor A domain-containing protein 5B2  
von Willebrand factor A domain-containing protein 8  
von Willebrand factor  
Tryptophan--tRNA ligase, cytoplasmic  
WW domain-binding protein 2  
WD repeat-containing protein 1  
WD repeat-containing protein 47  
WD repeat-containing protein 61  
Wolframin  
WNT1-inducible-signaling pathway protein 2  
Xanthine dehydrogenase/oxidase  
Xin actin-binding repeat-containing protein 1  
Xaa-Pro aminopeptidase 1

Exportin-1  
Xyloside xylosyltransferase 1  
Tyrosine--tRNA ligase, cytoplasmic  
Nuclease-sensitive element-binding protein 1  
Tyrosine-protein kinase Yes  
Synaptobrevin homolog YKT6  
14-3-3 protein beta/alpha  
14-3-3 protein epsilon  
14-3-3 protein gamma  
14-3-3 protein eta  
14-3-3 protein theta  
14-3-3 protein zeta/delta  
Mitogen-activated protein kinase kinase kinase MLT  
Zinc finger CCCH domain-containing protein 4  
Zinc finger protein 36, C3H1 type-like 1  
Zinc finger protein 58  
CAAX prenyl protease 1 homolog  
Centromere/kinetochore protein zw10 homolog  
Zyxin



























Complex, mitochondrial

x, mitochondrial

complex, mitochondrial















































































iber 5
