# Supplementary material for: Deletion of type VIII collagen reduces blood pressure, increases carotid artery functional distensibility and promotes elastin deposition
Source: PubMed Central journal article supplement — Matrix Biol Plus. 2021 Sep 29;12:100085. doi: 10.1016/j.mbplus.2021.100085 (PMC8517381; doi:10.1016/j.mbplus.2021.100085), 2021-09-29
Supplement: mmc2.pdf [file mmc2.pdf]

**Supplemental Table S1B: Imputed dataset of 2353 total proteins with 175 differential proteins (p<0.**

| Gene names | Significant | Difference  | - Log p value | Log2(LFQ Col8-/-_1) | Log2(LFQ Col8-/-_2) |
|------------|-------------|-------------|---------------|---------------------|---------------------|
| Fech       | +           | 3.382236958 | 1.509117644   | 25.05540085         | 24.68351364         |
| Osgep      | +           | 2.571752071 | 4.198728173   | 22.97807693         | 23.28404427         |
| Acot11     | +           | 2.105901241 | 1.477232221   | 22.80023575         | 23.47691917         |
| Plod3      | +           | 2.065131187 | 1.320346218   | 22.24388504         | 22.87096405         |
| Aga        | +           | 1.916537285 | 1.952750923   | 23.07559776         | 23.04953003         |
| N/A        | +           | 1.894077301 | 1.627378591   | 23.97893333         | 23.95863342         |
| Tprg1l     | +           | 1.859460831 | 1.459186143   | 21.97018051         | 22.67443657         |
| Pdk1       | +           | 1.718135357 | 1.364022477   | 21.80510712         | 23.23567009         |
| Napg       | +           | 1.707140446 | 1.575229482   | 23.01886177         | 22.83447266         |
| Apeh       | +           | 1.483808041 | 1.350586667   | 22.50811577         | 23.10737991         |
| Prrc1      | +           | 1.472318172 | 1.480287455   | 21.9770813          | 22.06312561         |
| Fam3c      | +           | 1.170875072 | 1.596592242   | 22.62377167         | 23.00008392         |
| Myl6       | +           | 0.963307381 | 1.932907005   | 26.58634758         | 26.26184082         |
| S100a10    | +           | 0.923115253 | 1.527461865   | 28.97645378         | 28.7265358          |
| Hsd17b4    | +           | 0.883117676 | 1.448991828   | 22.89554214         | 22.33606339         |
| Ag2        | +           | 0.825303078 | 1.404460446   | 22.41933823         | 22.58756065         |
| Pdss2      | +           | 0.804397106 | 1.629235851   | 27.95775986         | 27.64251328         |
| Palld      | +           | 0.784472942 | 1.376404508   | 25.50139427         | 25.6823082          |
| Col14a1    | +           | 0.780597687 | 2.956347157   | 30.35657501         | 30.3982563          |
| Des        | +           | 0.684178352 | 2.150121794   | 26.64801025         | 26.81445694         |
| Zmpste24   | +           | 0.58784771  | 1.454550102   | 23.2572422          | 23.38824272         |
| Rnase4     | +           | 0.578791618 | 1.907243873   | 23.26899338         | 23.64899826         |
| Sparc      | +           | 0.458203793 | 1.497319792   | 25.92899704         | 25.61734009         |
| Ppic       | +           | 0.449406147 | 1.484907598   | 24.42451096         | 24.67195702         |
| Septin6    | +           | 0.446534157 | 1.441540276   | 24.66893005         | 24.68715096         |
| Pcolce     | +           | 0.446055889 | 1.766074634   | 25.24847412         | 25.23979759         |
| Ano6       | +           | 0.441217899 | 1.517635831   | 25.0868721          | 24.85243416         |
| Eif5b      | +           | 0.430675507 | 1.323926204   | 24.34921837         | 24.57253647         |
| Pdlim5     | +           | 0.422596931 | 3.713346636   | 27.666008           | 27.62477684         |
| Inpp4a     | +           | 0.422566414 | 1.322632322   | 23.68346024         | 23.72504807         |
| Cacna2d1   | +           | 0.417637825 | 2.153721852   | 27.2155838          | 27.2382679          |
| Dysf       | +           | 0.402622223 | 1.754338759   | 25.6613121          | 25.82536697         |
| Gng5       | +           | 0.401665688 | 1.596523616   | 25.11481667         | 24.92043495         |
| Mapre3     | +           | 0.400437832 | 1.463449141   | 23.35420609         | 23.43974304         |
| Tubb6      | +           | 0.398900986 | 1.467921769   | 25.66218185         | 25.76309204         |
| Map7d1     | +           | 0.379518986 | 1.336743609   | 23.73624229         | 23.79004669         |
| Xirp1      | +           | 0.378246784 | 1.815044061   | 25.26935196         | 25.60133171         |

|          |   |             |             |             |             |
|----------|---|-------------|-------------|-------------|-------------|
| Pef1     | + | 0.374653339 | 1.992174377 | 25.33391571 | 25.26874352 |
| Atp1a2   | + | 0.373134613 | 1.685453985 | 25.29435349 | 25.5515976  |
| Col6a6   | + | 0.368633747 | 2.880480138 | 30.15665627 | 30.15966606 |
| Postn    | + | 0.363574028 | 2.618942746 | 32.7892952  | 32.76885986 |
| Gls      | + | 0.357828617 | 1.949762298 | 25.11310768 | 25.42604828 |
| Mavs     | + | 0.351365566 | 1.357410679 | 25.08557701 | 25.03477287 |
| Dpt      | + | 0.349676609 | 2.057678821 | 29.64504051 | 29.3788166  |
| Col15a1  | + | 0.332344055 | 3.853583172 | 29.97404861 | 30.0622673  |
| Septin9  | + | 0.320576668 | 1.632315337 | 26.97956467 | 27.09275055 |
| Ikkip    | + | 0.313050747 | 2.174552403 | 22.8907814  | 23.1792984  |
| Cnn3     | + | 0.312690735 | 2.428891312 | 28.44490051 | 28.6069603  |
| Lox      | + | 0.312326431 | 1.788710765 | 27.57758713 | 27.66295624 |
| Bcat2    | + | 0.311786652 | 1.91010126  | 26.36456108 | 26.27806473 |
| Ckap4    | + | 0.306010723 | 1.496717889 | 27.17996979 | 26.87220573 |
| Synpo2   | + | 0.300588608 | 1.741957695 | 28.75560379 | 29.05602646 |
| Smtn     | + | 0.300449848 | 1.427133861 | 29.67586517 | 29.5233345  |
| Mapre1   | + | 0.297382832 | 2.844330519 | 25.44243622 | 25.44132805 |
| Add1     | + | 0.296934605 | 1.638212174 | 26.0907135  | 26.25571251 |
| Fkbp1a   | + | 0.295899391 | 1.698164618 | 26.39373589 | 26.20318031 |
| Aebp1    | + | 0.295713902 | 2.888858796 | 28.49598503 | 28.47278214 |
| Cnn1     | + | 0.290062428 | 1.6707636   | 31.95202827 | 32.14099121 |
| Capza1   | + | 0.289375305 | 2.661441709 | 25.19276047 | 25.44874954 |
| Gng12    | + | 0.289208889 | 1.474308694 | 25.15278816 | 25.18733406 |
| Eln      | + | 0.285712719 | 1.705780039 | 30.99435616 | 31.04472542 |
| Gpc6     | + | 0.280003548 | 1.854856518 | 26.24495888 | 26.43868065 |
| Serpinh1 | + | 0.279938698 | 1.750765154 | 30.54250145 | 30.46187782 |
| Flnc     | + | 0.278014183 | 1.879247947 | 28.74413109 | 28.87844467 |
| Atp5j2   | + | 0.2706213   | 1.377106951 | 26.44771004 | 26.58534431 |
| Col6a2   | + | 0.266316414 | 1.812660516 | 32.48450089 | 32.27957916 |
| Bgn      | + | 0.248378277 | 1.601781521 | 32.01498032 | 32.00871658 |
| Col6a1   | + | 0.228528023 | 2.414907347 | 32.67900467 | 32.58075714 |
| Tagln2   | + | 0.225367546 | 2.073449461 | 33.17859268 | 33.20180511 |
| Ilk      | + | 0.222169399 | 1.932825727 | 29.49604225 | 29.63167953 |
| Stxbp1   | + | 0.216610432 | 1.658707579 | 24.85252953 | 24.94172096 |
| Pdlim7   | + | 0.214846611 | 1.783134215 | 29.42053413 | 29.64218521 |
| Col4a3   | + | 0.210779667 | 1.649142227 | 24.85486031 | 24.91556549 |
| Emilin1  | + | 0.197975159 | 2.735112584 | 29.54646301 | 29.62808418 |
| Mcam     | + | 0.186146736 | 1.968394678 | 28.60629082 | 28.49712753 |
| Ace      | + | 0.186111927 | 1.447291351 | 29.13359451 | 29.1193409  |
| Esyt2    | + | 0.184381485 | 1.658399485 | 26.52329254 | 26.66979599 |
| Actn1    | + | 0.183374882 | 1.651234385 | 32.13332367 | 32.07530212 |

|         |   |              |             |             |             |
|---------|---|--------------|-------------|-------------|-------------|
| Dpysl3  | + | 0.176403046  | 2.149529908 | 29.88419342 | 29.89678955 |
| Cdh13   | + | 0.169661045  | 1.840471833 | 28.44122505 | 28.52361488 |
| Eml1    | + | 0.165255547  | 1.475157482 | 26.51246834 | 26.60272026 |
| Anxa2   | + | 0.155399799  | 1.348407701 | 32.11759186 | 32.07399368 |
| Cspg4   | + | 0.153440475  | 2.079168947 | 28.77476692 | 28.73110962 |
| Col18a1 | + | 0.145747185  | 1.601072611 | 30.99280548 | 30.96781158 |
| Psmc1   | + | 0.144684315  | 1.556294436 | 24.96172714 | 24.89587402 |
| Ptrf    | + | 0.144393921  | 1.664753772 | 30.86097527 | 30.71013832 |
| Trip6   | + | 0.140184402  | 1.941335083 | 25.72179413 | 25.67559433 |
| Acta2   | + | 0.130793571  | 1.438138306 | 32.22934341 | 32.31051254 |
| Septin2 | + | 0.122727871  | 1.354165961 | 27.87788963 | 27.83611298 |
| Pfn1    | + | 0.117507935  | 1.482114928 | 29.87654495 | 29.9797821  |
| Fermt2  | + | 0.061072826  | 1.635816459 | 29.42310143 | 29.48123741 |
| Dnpep   | + | -0.133137226 | 1.39825063  | 26.12143326 | 26.27330589 |
| Anxa4   | + | -0.14982748  | 2.052195908 | 27.44695282 | 27.4587326  |
| Hspe1   | + | -0.151346207 | 1.389927566 | 27.82765961 | 27.81323242 |
| Gstm1   | + | -0.156620026 | 1.473395469 | 31.84067345 | 32.02604294 |
| Vps35   | + | -0.184728146 | 1.337457155 | 26.74162674 | 26.87114716 |
| Anxa5   | + | -0.185384274 | 2.256435074 | 30.84849358 | 30.90073967 |
| Mgll    | + | -0.190984726 | 1.555665639 | 25.43338966 | 25.39640045 |
| Ran     | + | -0.200575829 | 1.761454627 | 27.03023148 | 26.87829971 |
| Erh     | + | -0.201847076 | 1.391264905 | 24.4596405  | 24.6105423  |
| Sdpr    | + | -0.202011585 | 2.200247205 | 27.32937241 | 27.186409   |
| Thsd4   | + | -0.20222187  | 1.391342274 | 26.76217842 | 26.61610603 |
| Cbr2    | + | -0.206911564 | 2.381958636 | 29.34229469 | 29.47514153 |
| Ero1l   | + | -0.207582951 | 1.821528878 | 23.4199543  | 23.57922935 |
| Cbr1    | + | -0.208376884 | 2.52535862  | 26.10243416 | 26.19392586 |
| Anxa1   | + | -0.21546936  | 1.754064215 | 29.50958252 | 29.37254143 |
| Kpnb1   | + | -0.224582672 | 1.632023766 | 27.99728012 | 28.14472198 |
| Gstt3   | + | -0.245191097 | 1.551442179 | 25.95493507 | 25.9819622  |
| Txndc17 | + | -0.253442287 | 1.326701901 | 25.05374336 | 25.22423935 |
| Prpf8   | + | -0.254412174 | 1.319518303 | 24.73943901 | 25.0110321  |
| Psmc4   | + | -0.260583401 | 2.085046181 | 26.32656288 | 26.27396393 |
| Ecm29   | + | -0.266244888 | 2.099504176 | 24.11925697 | 24.18978691 |
| Snrpb   | + | -0.269165039 | 1.75161097  | 24.45255661 | 24.52903938 |
| Rpl29   | + | -0.269359589 | 1.403472826 | 23.76070786 | 23.5308857  |
| Psmc2   | + | -0.273206711 | 1.392006362 | 26.53712273 | 26.95271492 |
| Efh2    | + | -0.274438858 | 1.435783514 | 22.44657516 | 22.49267387 |
| Bag6    | + | -0.274927139 | 2.410392586 | 23.58817863 | 23.48099136 |
| Aldh9a1 | + | -0.292712688 | 1.504561653 | 25.39597511 | 25.80891991 |
| Ica     | + | -0.304176807 | 2.234487269 | 23.69370461 | 23.6307869  |

|           |   |              |             |             |             |
|-----------|---|--------------|-------------|-------------|-------------|
| Sqrdl     | + | -0.309355736 | 2.55796225  | 25.21778488 | 25.17983818 |
| Samhd1    | + | -0.321038246 | 1.32920908  | 25.98522377 | 26.24149132 |
| Snx1      | + | -0.333074093 | 1.398544911 | 24.80538177 | 24.23622513 |
| Cct6a     | + | -0.335685253 | 2.400818155 | 26.52881622 | 26.73013687 |
| Psme2     | + | -0.340397358 | 1.333763087 | 26.83857918 | 26.9755249  |
| Chd4      | + | -0.361102581 | 1.769169824 | 24.02799988 | 24.05142212 |
| Hsd17b11  | + | -0.369546413 | 1.533005111 | 25.31772423 | 25.30396271 |
| Fuom      | + | -0.369997501 | 3.408404696 | 23.40846825 | 23.32841301 |
| Srsf3     | + | -0.38270092  | 1.575580588 | 25.28439713 | 25.4262085  |
| Ptpn12    | + | -0.386180401 | 1.743130884 | 20.49648285 | 20.76287842 |
| Ttr       | + | -0.38838768  | 1.43735993  | 27.87050056 | 27.41554642 |
| C4b       | + | -0.390030384 | 1.850333428 | 27.21595383 | 27.0348568  |
| Psip1     | + | -0.411422729 | 1.714939472 | 24.31347466 | 24.29123116 |
| Usp9x     | + | -0.41556263  | 1.377910081 | 26.13269234 | 26.2021904  |
| Xdh       | + | -0.445792675 | 1.633279591 | 24.03775024 | 24.51989365 |
| Got1      | + | -0.448171616 | 1.437077909 | 24.29284477 | 23.76971436 |
| Gda       | + | -0.451441765 | 2.726573966 | 23.38837433 | 23.33142281 |
| Abhd14b   | + | -0.459507942 | 2.182724107 | 25.36432838 | 25.25821304 |
| Ftl1      | + | -0.46950388  | 1.347296887 | 27.421175   | 27.68912506 |
| Bphl      | + | -0.522892475 | 1.330260568 | 24.98220062 | 25.24959564 |
| Psma4     | + | -0.551069736 | 1.659442713 | 25.50908852 | 25.41037941 |
| Rhot1     | + | -0.554106712 | 1.642700766 | 23.58394051 | 23.86145401 |
| Hectd1    | + | -0.585552692 | 1.707000578 | 20.15783119 | 20.0256691  |
| Skiv2l2   | + | -0.591099739 | 1.731264979 | 22.95064735 | 23.29963875 |
| Glr3      | + | -0.6247859   | 3.014130406 | 24.44354248 | 24.4126091  |
| Dnajc19   | + | -0.714222908 | 1.405937349 | 19.41191673 | 20.41131592 |
| Eif3l     | + | -0.729324818 | 1.440879694 | 23.41531944 | 23.36946297 |
| Ddx46     | + | -0.798279762 | 1.342070807 | 21.94724846 | 21.52759743 |
| Ugdh      | + | -0.808923721 | 1.855664876 | 24.7023983  | 24.58588982 |
| Hrg       | + | -0.854629517 | 1.98443226  | 24.21304512 | 23.97342491 |
| Pla2g16   | + | -0.862401009 | 2.583043286 | 19.66872025 | 19.71246719 |
| Adh1      | + | -0.883069038 | 2.884839784 | 24.91218758 | 24.99429512 |
| Srpr      | + | -0.937836647 | 1.408000733 | 20.55384254 | 21.50280762 |
| Pon2      | + | -0.94248867  | 1.319213301 | 21.09674072 | 22.08440018 |
| App       | + | -0.950093746 | 1.305315927 | 23.54274178 | 23.05569839 |
| Rpa2      | + | -0.969217777 | 2.807017235 | 20.87597656 | 20.61522102 |
| Serpina3m | + | -0.969385147 | 1.639047947 | 28.06522369 | 28.71364975 |
| Itm2b     | + | -0.978942871 | 1.697472672 | 20.41253853 | 20.86045074 |
| Tomm5     | + | -0.991278648 | 1.794444913 | 20.15368843 | 21.06058693 |
| Tmem256   | + | -1.0166049   | 1.454500478 | 22.73479652 | 21.37952042 |
| Ighm      | + | -1.062169075 | 2.044592935 | 26.5625267  | 26.13090706 |

|           |   |              |             |             |             |
|-----------|---|--------------|-------------|-------------|-------------|
| Lgals3bp  | + | -1.125296593 | 1.487051636 | 20.7720356  | 21.08783531 |
| Dcxr      | + | -1.183615685 | 2.20030632  | 19.19366455 | 19.84251595 |
| Notch3    | + | -1.268364429 | 1.81593516  | 20.03216934 | 20.96126938 |
| Bzrap1    | + | -1.346906185 | 1.803504606 | 23.50263786 | 22.55980492 |
| Pik3r1    | + | -1.353751183 | 1.796219196 | 20.53821373 | 21.62627029 |
| Epn3      | + | -1.823766232 | 1.992903155 | 20.84386253 | 19.96886826 |
| Dapk3     | + | -2.171921253 | 1.908911262 | 22.5104351  | 20.32747078 |
| Krt85     | + | -2.224033356 | 1.79078334  | 20.43018913 | 19.5817585  |
| Dsp       | + | -2.268306255 | 1.345420326 | 22.99941444 | 23.49350548 |
| Mup9      | + | -2.306945324 | 2.670881061 | 20.2466774  | 19.43536568 |
| Kdm1b     | + | -2.740858555 | 3.921611003 | 21.24747467 | 20.75329208 |
| Krt33a    | + | -3.085149288 | 1.58439243  | 21.08062172 | 20.51421928 |
| S100a3    | + | -3.496547222 | 1.568638597 | 19.87410164 | 20.41849327 |
| Krtap8-1  | + | -3.615775585 | 1.529090935 | 19.91387367 | 21.44516563 |
| Krtap19-3 | + | -4.09680891  | 1.667719358 | 20.70944977 | 20.24485016 |
| A2m       |   | -0.257859707 | 0.82480271  | 30.17521858 | 29.5590477  |
| Aars      |   | -0.058942318 | 0.141175184 | 24.89541245 | 24.87722397 |
| Aarsd1    |   | -1.070933819 | 0.894965128 | 21.46166229 | 19.40851974 |
| Abat      |   | -0.219346046 | 0.524549879 | 24.17287445 | 24.69789886 |
| Abca8b    |   | -0.777572632 | 0.453511016 | 19.55714989 | 21.60860252 |
| Abcc9     |   | -0.060088158 | 0.05773205  | 22.91816139 | 22.71969032 |
| Abcd3     |   | -0.201580524 | 0.604377113 | 23.12746811 | 23.70767212 |
| Abce1     |   | -0.092211723 | 0.280394132 | 23.20457649 | 22.82444572 |
| Abcf1     |   | -0.093919277 | 0.18306465  | 21.19291878 | 21.84406471 |
| Abhd11    |   | -0.037024498 | 0.151922086 | 23.93183899 | 24.26011848 |
| Abhd12    |   | -0.096956253 | 0.198577009 | 24.21334076 | 24.1710434  |
| Abhd16a   |   | -0.073053837 | 0.183821242 | 24.4432888  | 24.5961647  |
| Abhd5     |   | -0.31103611  | 0.364919406 | 24.09240723 | 23.69168282 |
| Abi1      |   | -0.334907532 | 0.146061145 | 21.28374481 | 21.79219055 |
| Ablim1    |   | 0.51310873   | 0.265707933 | 19.74240875 | 22.59325027 |
| Abracl    |   | -0.031710625 | 0.123387318 | 25.2886982  | 25.41876602 |
| Acaa1a    |   | 0.031332016  | 0.083328364 | 25.72712708 | 25.97688103 |
| Acaa2     |   | -0.116802692 | 0.089604216 | 29.89387131 | 30.24762344 |
| Acaca     |   | -0.21006918  | 0.251331609 | 25.16614723 | 25.62745094 |
| Acad10    |   | 0.657740593  | 0.480120991 | 22.42943573 | 22.29605675 |
| Acad9     |   | 0.172578812  | 0.37772703  | 23.97167206 | 24.12447357 |
| Acadl     |   | -0.214492321 | 0.194506296 | 29.18222237 | 29.28299332 |
| Acadm     |   | -0.002643585 | 0.002230688 | 29.15812492 | 29.44239235 |
| Acads     |   | -0.065029621 | 0.079402514 | 27.63297844 | 27.74233246 |
| Acadsb    |   | -0.073194504 | 0.149805874 | 25.86046028 | 25.75159454 |
| Acadvl    |   | -0.113926888 | 0.108281319 | 28.78892708 | 28.9890728  |

|          |              |             |             |             |
|----------|--------------|-------------|-------------|-------------|
| Acan     | 0.460333824  | 0.749294844 | 27.49754715 | 27.31553268 |
| Acat1    | -0.088744164 | 0.216152677 | 29.2882843  | 29.24238586 |
| Acat2    | -0.239433289 | 1.027706342 | 25.15695953 | 25.27856064 |
| Acin1    | -0.299306393 | 0.304611808 | 23.11543655 | 23.150877   |
| Acly     | 0.009790897  | 0.021806671 | 27.89342308 | 28.54896164 |
| Aco1     | 0.021155357  | 0.069438156 | 26.72728348 | 26.83508873 |
| Aco2     | -0.051834106 | 0.043836967 | 30.53917694 | 30.7950573  |
| Acot13   | -0.242779732 | 0.310901548 | 23.93283081 | 24.53593636 |
| Acot2    | 0.118498325  | 0.272678354 | 25.23786736 | 25.61217499 |
| Acot7    | 0.066975594  | 0.047876708 | 22.5036087  | 22.43221855 |
| Acot9    | 0.039908886  | 0.118627102 | 26.34423065 | 26.65389824 |
| Acp1     | -0.116752625 | 0.342497501 | 25.14755821 | 25.12245941 |
| Acsf2    | -0.790815353 | 0.545031648 | 21.97645187 | 22.75641823 |
| Acsf3    | -0.090058804 | 0.047589474 | 21.13076591 | 20.77988625 |
| Acs11    | -0.141486645 | 0.240790373 | 28.70091057 | 28.77548981 |
| Acs15    | -0.390666962 | 0.66476597  | 20.67115784 | 20.82601738 |
| Actb     | 0.51196909   | 1.203114736 | 28.12346649 | 27.27967644 |
| Actc1    | 0.087364197  | 0.548376259 | 35.3516922  | 35.40505219 |
| Actg1    | 0.092303276  | 0.92967418  | 33.47157669 | 33.55167389 |
| Act16a   | -0.052636147 | 0.058887608 | 22.00764847 | 23.21775436 |
| Actn4    | 0.262200356  | 1.229807547 | 29.34280396 | 29.12072563 |
| Actr10   | -0.28963089  | 0.382301948 | 22.67441559 | 23.24627876 |
| Actr1a   | -0.125317574 | 0.425214026 | 24.65731049 | 24.79530907 |
| Actr1b   | -0.160355568 | 0.64470743  | 27.12907982 | 27.00859833 |
| Actr2    | -0.000394821 | 0.000938406 | 28.03070641 | 28.27825928 |
| Actr3    | 0.066427708  | 0.429475951 | 29.46460533 | 29.48218155 |
| Acyp1    | -0.065456867 | 0.127155044 | 24.03456306 | 24.13241768 |
| Adam10   | 0.332565308  | 0.326167714 | 20.99085426 | 20.83198166 |
| Adamts14 | 0.6644063    | 0.496843906 | 23.0403614  | 23.41969872 |
| Adck3    | 0.023924351  | 0.021959397 | 24.78161812 | 24.84119797 |
| Adcy5    | -0.020297527 | 0.061002244 | 25.11513519 | 25.31544495 |
| Adcy7    | 0.43220377   | 0.52798435  | 21.83124733 | 21.77217293 |
| Add3     | 0.436903954  | 0.698268126 | 23.55438232 | 23.11577034 |
| Adh5     | -0.10977459  | 0.522810013 | 26.74931908 | 26.97650909 |
| Adh7     | 0.714199066  | 0.252378378 | 23.28277206 | 24.02326775 |
| Adipoq   | 0.113071918  | 0.361772418 | 24.76111412 | 25.17165375 |
| Adk      | -0.210632801 | 0.215257321 | 25.9557991  | 25.96710396 |
| Adpgk    | 0.106284142  | 0.326855579 | 21.53026772 | 21.65298462 |
| Adrbk2   | 0.045748711  | 0.038590639 | 21.85753059 | 21.97000504 |
| Adrm1    | -0.301197052 | 0.139164038 | 21.29832458 | 21.23274612 |
| Adsl     | 0.088407516  | 0.325499938 | 25.54450989 | 25.60305977 |



|          |              |             |             |             |
|----------|--------------|-------------|-------------|-------------|
| Adssl1   | 0.491183281  | 0.618077668 | 22.55065346 | 22.16545677 |
| Afg3l2   | 0.232080936  | 0.555565873 | 22.59850693 | 22.52090073 |
| Afm      | -0.085717678 | 0.119126619 | 20.93488312 | 20.59841537 |
| Agk      | -0.630475521 | 0.315984277 | 23.6568737  | 23.58989525 |
| Ago2     | -1.092789173 | 0.603086644 | 23.2254982  | 23.15901756 |
| Agpat2   | 0.363395214  | 0.467959697 | 22.54667854 | 22.640131   |
| Agrn     | -0.068068504 | 0.209886347 | 25.42684746 | 25.0267334  |
| Ahcy     | -0.073794365 | 0.117317173 | 26.09703827 | 26.51288986 |
| Ahcyl1   | -0.210496426 | 0.409620885 | 23.42572784 | 23.86693382 |
| Ahsa1    | -0.178017616 | 0.392435222 | 23.47506523 | 24.24554062 |
| Ahsg     | 0.009993076  | 0.015772415 | 29.90382957 | 29.34161758 |
| Aifm1    | 0.255277634  | 0.459756559 | 24.84340477 | 25.00919533 |
| Aifm2    | 1.188244343  | 0.997895552 | 20.45792007 | 22.72100639 |
| Aimp1    | -0.034053802 | 0.058007135 | 24.65075111 | 24.93093681 |
| Aimp2    | 0.007547855  | 0.015016048 | 23.5370636  | 24.22655678 |
| Aip      | -0.131065369 | 0.071521017 | 21.05938339 | 22.95569229 |
| Ak1      | -0.213637829 | 0.912690524 | 27.2541275  | 27.49251366 |
| Ak2      | -0.287996292 | 0.973631808 | 26.91524696 | 27.11783218 |
| Ak3      | 0.131917953  | 0.962317311 | 27.22765923 | 27.12642479 |
| Akap12   | 0.255045414  | 0.7548176   | 25.66367531 | 25.7654705  |
| Akr1a1   | -0.125985146 | 0.746193675 | 26.9854393  | 26.93741798 |
| Akr1b1   | -0.028944969 | 0.152588557 | 27.83888054 | 27.85346985 |
| Akr1b7   | 0.057573318  | 0.10730141  | 23.74755287 | 24.04393578 |
| Akr1b8   | 0.233963966  | 0.50696079  | 25.61742401 | 25.77122498 |
| Akr7a2   | -0.047966003 | 0.126639063 | 24.71109009 | 24.93359566 |
| Akt1s1   | 0.030324459  | 0.047608279 | 21.58458328 | 22.00411987 |
| Alad     | 0.319130898  | 0.173808443 | 23.31534195 | 22.60885048 |
| Alb      | -0.23001194  | 0.592210343 | 34.44047928 | 33.877285   |
| Alcam    | -0.330226898 | 0.497158073 | 24.2493782  | 24.79188538 |
| Aldh16a1 | -0.255509853 | 0.209946802 | 19.96691132 | 20.49306488 |
| Aldh18a1 | 0.513132095  | 0.440766856 | 21.66409874 | 20.68159103 |
| Aldh1a1  | 0.235945225  | 0.244785063 | 24.00581741 | 23.24090576 |
| Aldh1l2  | -0.333593845 | 0.24240565  | 21.12155724 | 23.00537109 |
| Aldh2    | 0.044559479  | 1.18986637  | 30.65897942 | 30.65855217 |
| Aldh3a2  | 0.008934498  | 0.026574162 | 25.66065979 | 25.92098045 |
| Aldh4a1  | -0.047771454 | 0.056798336 | 24.63848495 | 24.50911903 |
| Aldh5a1  | 0.661359787  | 0.5175275   | 21.93340683 | 22.21273232 |
| Aldh6a1  | 0.039993286  | 0.094692586 | 28.08050346 | 28.25065422 |
| Aldh7a1  | 0.00402689   | 0.017237415 | 26.66410828 | 26.76217842 |
| Aldoa    | -0.218126297 | 0.610396885 | 29.39601135 | 29.57818031 |
| Alg2     | -0.187947273 | 0.298392684 | 21.73343086 | 22.26533508 |

|         |              |             |             |             |
|---------|--------------|-------------|-------------|-------------|
| Alox5ap | 0.037076473  | 0.039374863 | 20.78148842 | 20.56318474 |
| Alyref  | 0.752319813  | 0.443860219 | 24.11195564 | 24.0839138  |
| Anapc1  | 0.771293163  | 0.632321351 | 21.95532036 | 23.28714943 |
| Ank1    | 0.340174675  | 0.861983503 | 27.57455826 | 26.89793015 |
| Ank2    | -0.357489586 | 0.976344746 | 23.24981308 | 23.07238007 |
| Ankfy1  | -0.774113655 | 0.640871402 | 22.20815468 | 20.85597229 |
| Ano10   | 0.41706562   | 0.96145605  | 24.94122887 | 24.11569023 |
| Anp32a  | -0.148119926 | 0.326945073 | 25.22725487 | 25.20445061 |
| Anp32b  | 0.086294174  | 0.320474159 | 24.73505402 | 24.95593262 |
| Anp32e  | -0.152810574 | 0.298757732 | 24.95215988 | 25.25860977 |
| Anpep   | -0.089501858 | 0.183296525 | 28.3731842  | 28.45748138 |
| Anxa11  | -0.150018215 | 1.115954354 | 27.63394928 | 27.71992874 |
| Anxa3   | -0.165409088 | 1.227886192 | 28.42358208 | 28.35665894 |
| Anxa6   | 0.014432907  | 0.138142665 | 31.24081802 | 31.28432846 |
| Anxa7   | -0.046670437 | 0.3810673   | 27.56398201 | 27.53274536 |
| Aoc3    | 0.000328541  | 0.002122875 | 31.61802483 | 31.73335838 |
| Aox1    | -0.128930092 | 0.747405324 | 23.14497757 | 23.42828751 |
| Ap1b1   | -0.064511299 | 0.133170879 | 24.6373806  | 24.5937748  |
| Ap1g1   | -0.109521389 | 0.190094654 | 22.55655861 | 23.04010963 |
| Ap2a1   | 0.070261955  | 0.366269828 | 26.93280792 | 27.07255173 |
| Ap2a2   | -0.014687538 | 0.053404758 | 27.81775284 | 28.06321907 |
| Ap2b1   | -0.041480541 | 0.181031655 | 27.76774597 | 27.89966011 |
| Ap2m1   | -0.059380531 | 0.831282786 | 26.57214546 | 26.70977783 |
| Ap2s1   | -0.021205425 | 0.036350181 | 24.50524521 | 24.88781166 |
| Ap3b1   | 0.065863132  | 0.112903743 | 23.62287903 | 24.02614212 |
| Ap3d1   | 0.01295948   | 0.068853784 | 22.692173   | 22.80124283 |
| Apex1   | -0.261209965 | 0.2992716   | 23.69349289 | 23.76779556 |
| Api5    | -0.192539692 | 0.626805755 | 24.2110405  | 24.16015625 |
| Apmap   | 0.136705399  | 0.051920487 | 22.69608498 | 23.56465149 |
| Apoa1   | -0.094760895 | 0.101390327 | 29.34625435 | 28.27364349 |
| Apoa1bp | -0.153061867 | 0.811305931 | 26.82832527 | 26.91410637 |
| Apoa2   | 0.038075924  | 0.030704192 | 26.22284126 | 25.34877968 |
| Apoa4   | -0.251269341 | 0.588977682 | 27.57823563 | 27.03296661 |
| Apoc1   | 1.056295872  | 0.464777819 | 25.28439713 | 24.19865417 |
| Apoc2   | -0.980708599 | 0.608212011 | 24.24067116 | 23.89171028 |
| Apoe    | 0.086492538  | 0.180131104 | 25.59565353 | 24.96172714 |
| Apoh    | 0.063871384  | 0.199355054 | 27.23544121 | 26.99604225 |
| Apoo    | -0.067653179 | 0.098897625 | 22.88940811 | 23.02211761 |
| Apool   | 0.002538681  | 0.003721995 | 24.01111794 | 24.67330551 |
| Appl1   | 0.16797781   | 1.173834564 | 24.36205482 | 24.22567558 |
| Aprt    | -0.207539558 | 0.681859941 | 24.8818512  | 24.99524498 |



|          |              |             |             |             |
|----------|--------------|-------------|-------------|-------------|
| Aqp1     | 0.216496468  | 0.217317434 | 25.17896461 | 26.17369461 |
| Arcn1    | -0.241546631 | 0.664831411 | 24.84474564 | 24.84426689 |
| Arf1     | -0.192079067 | 1.24775557  | 27.34324837 | 27.47946548 |
| Arf2     | -0.121993542 | 0.391181785 | 21.33598137 | 21.51306534 |
| Arf4     | 0.171702385  | 0.167787721 | 25.90046501 | 26.56579971 |
| Arf5     | 0.85008812   | 0.725374987 | 23.09453583 | 23.02725601 |
| Arf6     | 0.456562996  | 0.473975968 | 22.20651627 | 22.90538216 |
| Arfgef2  | -0.606719494 | 0.482643627 | 20.72492409 | 20.58279228 |
| Arhgap1  | -0.025662899 | 0.102751356 | 26.32225418 | 26.42321396 |
| Arhgap17 | 0.263404846  | 0.219062455 | 22.85881996 | 23.69115067 |
| Arhgap32 | -1.554393291 | 0.474394531 | 21.71430779 | 27.56674194 |
| Arhgdia  | -0.002401352 | 0.010837246 | 28.43650627 | 28.24603844 |
| Arhgdib  | -0.156968117 | 0.569653869 | 23.63832092 | 23.55754089 |
| Arhgef2  | 0.809628487  | 0.426378549 | 23.43313599 | 23.694767   |
| Arhgef7  | -1.317762852 | 0.725560751 | 21.0735836  | 20.20353508 |
| Arl1     | -0.089370251 | 0.188923858 | 23.73913002 | 23.86750031 |
| Arl3     | -0.128546715 | 0.536308134 | 24.88753319 | 25.13825035 |
| Arl6ip1  | -0.508405685 | 1.244009374 | 21.77023888 | 22.52432442 |
| Arl6ip5  | 0.084452629  | 0.537280049 | 25.83593178 | 25.69943428 |
| Arl8b    | 0.397414684  | 0.799619138 | 24.93678856 | 25.13371277 |
| Armc1    | 0.096776009  | 0.197812541 | 23.6738987  | 23.9910965  |
| Arpc1b   | 0.063853264  | 0.170270462 | 28.16384506 | 28.63865089 |
| Arpc2    | 0.00421381   | 0.013310211 | 27.53934288 | 27.52372742 |
| Arpc3    | 0.095059872  | 0.87811448  | 27.68919182 | 27.6502037  |
| Arpc4    | 4.15E-05     | 0.000216111 | 28.17807198 | 28.3225975  |
| Arpc5    | -0.067485809 | 0.327295623 | 25.44085312 | 25.31392479 |
| Arpc5l   | -0.118808746 | 0.421147572 | 24.45192719 | 24.60240936 |
| Asah1    | -0.193537712 | 0.40665817  | 24.92619324 | 25.051754   |
| Asl      | -0.278310776 | 0.609331539 | 23.71952248 | 23.49960136 |
| Asna1    | -0.264382839 | 0.391015889 | 22.88743973 | 23.98919296 |
| Asph     | 0.133377075  | 0.660737828 | 25.84239769 | 25.94176674 |
| Aspn     | 0.066062927  | 0.433445358 | 31.60337448 | 31.42787361 |
| Asrgl1   | -0.731586933 | 0.446349482 | 19.58349991 | 21.95734215 |
| Atad3    | 0.257356167  | 0.520075912 | 22.00058365 | 22.37464523 |
| Atg5     | 0.398751259  | 0.832835922 | 23.14476013 | 23.06633186 |
| Atg7     | 0.010608196  | 0.012711132 | 22.05337906 | 22.61573601 |
| Atic     | -0.166256428 | 1.180544755 | 27.32036018 | 27.3572464  |
| Atl2     | -1.15511179  | 0.561320977 | 19.47372627 | 19.84638023 |
| Atl3     | 0.069384098  | 0.390954227 | 27.89550591 | 27.99356079 |
| Atox1    | -0.04338789  | 0.086387744 | 26.085495   | 25.79307747 |
| Atp1a1   | 0.028580666  | 0.137411321 | 27.31613731 | 27.41086388 |

|          |              |             |             |             |
|----------|--------------|-------------|-------------|-------------|
| Atp1b1   | 0.091607571  | 0.107997595 | 25.05763245 | 24.86116982 |
| Atp1b3   | -0.248932838 | 0.548724783 | 24.93463135 | 25.00066948 |
| Atp2a2   | -0.052320957 | 0.217719651 | 27.44490051 | 27.55325508 |
| Atp2a3   | 0.071470261  | 0.162493349 | 23.40522575 | 23.59160805 |
| Atp2b1   | 0.693659306  | 0.655169889 | 21.58998489 | 22.25824928 |
| Atp2b4   | 0.031209946  | 0.162699943 | 26.21830177 | 26.34197807 |
| Atp5a1   | -0.036808014 | 0.961185392 | 30.5963707  | 30.62679672 |
| Atp5b    | -0.077164173 | 0.900629935 | 31.40735245 | 31.53027344 |
| Atp5c1   | -0.021743774 | 0.191104774 | 27.08588028 | 27.04374695 |
| Atp5f1   | -0.15955162  | 0.613914937 | 27.68210793 | 27.70285988 |
| Atp5h    | 0.011185169  | 0.07307611  | 27.30947304 | 27.33321571 |
| Atp5i    | 0.18934679   | 0.607304855 | 24.65681839 | 24.96194839 |
| Atp5j    | -0.120993614 | 0.031587927 | 23.50106049 | 23.06324005 |
| Atp5l    | -0.141303539 | 0.490209447 | 26.01692963 | 26.09277153 |
| Atp5o    | -0.052155018 | 0.173786946 | 28.70744133 | 28.90535164 |
| Atp6v0a1 | 0.001414299  | 0.000605284 | 18.8936348  | 21.44440269 |
| Atp6v0d1 | 1.036431313  | 0.65852961  | 23.29656029 | 24.01639748 |
| Atp6v1a  | -0.139462948 | 0.382834216 | 24.77735901 | 25.34506035 |
| Atp6v1b2 | -0.113855839 | 0.09059524  | 19.9057312  | 21.06769371 |
| Atp6v1e1 | -0.419242859 | 0.517298047 | 22.2246151  | 23.36892891 |
| Atxn10   | -0.401813507 | 0.239751431 | 22.57798386 | 19.90834427 |
| Auh      | -0.898886204 | 0.539441227 | 22.98269653 | 22.97715187 |
| Axl      | -0.33712101  | 0.553862852 | 22.35231972 | 23.12186813 |
| B2m      | -0.227510452 | 0.711176641 | 24.60229492 | 24.34143448 |
| B4galt2  | -0.252451897 | 0.082305815 | 20.26031303 | 22.5577507  |
| Bag3     | 0.158191681  | 0.448454834 | 24.90187073 | 24.92202377 |
| Bag5     | 0.086276531  | 0.20396481  | 21.71162605 | 21.89167213 |
| Banf1    | 0.107152462  | 0.851290232 | 27.87097168 | 28.00029373 |
| Bax      | -0.028315544 | 0.113768609 | 22.85540199 | 22.80195236 |
| Bcam     | 0.077244759  | 0.528768464 | 28.42049408 | 28.24008942 |
| Bcar1    | 0.431628704  | 0.444852841 | 20.97840881 | 21.04006004 |
| Bcas3    | 0.110262394  | 0.456170022 | 21.16527176 | 21.29260635 |
| Bckdha   | 0.027868748  | 0.054768697 | 23.8314209  | 24.21237564 |
| Bckdhb   | -0.094271183 | 0.065499356 | 25.13922691 | 24.08237267 |
| Bckdk    | -0.594061375 | 1.095650165 | 21.84467888 | 22.07985115 |
| Blmh     | 0.013599396  | 0.034523859 | 24.93039513 | 25.12970924 |
| Blvra    | 0.39931345   | 0.644931518 | 24.58915138 | 25.00710106 |
| Blvrb    | -0.075775623 | 0.214288171 | 25.4616394  | 25.36599731 |
| Bpgm     | 0.937111855  | 1.185011118 | 21.79427719 | 20.59221268 |
| Bpnt1    | -0.353139877 | 0.923699168 | 23.97219849 | 24.14180183 |
| Bre      | -0.02106142  | 0.011175558 | 20.7305088  | 21.16949463 |

|         |              |             |             |             |
|---------|--------------|-------------|-------------|-------------|
| Brox    | 0.11485815   | 0.301664718 | 22.52152443 | 22.5745697  |
| Btf3    | 0.689844608  | 0.763396386 | 20.748209   | 21.51955795 |
| Btk     | -0.695064545 | 0.90999618  | 19.40955734 | 20.3400631  |
| C1qbp   | -0.040477753 | 0.059678333 | 24.81753349 | 24.25983047 |
| C3      | 0.057627678  | 0.219112333 | 28.11132813 | 27.73744202 |
| C4bpa   | 0.201809883  | 0.436454184 | 25.92942619 | 25.3335743  |
| C5      | -0.337580681 | 0.806689366 | 22.8450222  | 22.1429863  |
| C9      | -0.029914856 | 0.062122725 | 21.88498306 | 21.24655533 |
| Ca1     | 1.001214504  | 0.918759226 | 24.58880806 | 23.49277306 |
| Ca2     | -0.114824295 | 0.10628737  | 28.33146667 | 26.93831635 |
| Ca3     | -0.489739895 | 0.537500356 | 29.85412407 | 29.46374893 |
| Cab39   | -0.020797729 | 0.202156694 | 25.27820587 | 25.42540741 |
| Cacybp  | 0.052295685  | 0.033832468 | 22.23172188 | 21.69178963 |
| Cad     | -0.213037014 | 0.364493481 | 21.824543   | 22.69829178 |
| Calm3   | -0.0023036   | 0.004222214 | 27.421175   | 26.79253197 |
| Calr    | 0.070388317  | 0.190590296 | 27.64753151 | 27.48600388 |
| Calu    | -0.602280617 | 1.047637335 | 24.04418564 | 24.19204521 |
| Camk1   | -0.12471056  | 0.49198561  | 23.06956291 | 23.30646896 |
| Camk2d  | 0.022273064  | 0.08958573  | 27.36360931 | 27.53489876 |
| Camk2g  | 0.23003912   | 0.804717561 | 26.01180077 | 26.25459671 |
| Camlg   | -0.591819286 | 0.919517236 | 21.32108116 | 22.0586071  |
| Cand1   | -0.124158382 | 0.943567517 | 28.12307167 | 28.33415413 |
| Canx    | 0.137093067  | 0.4315203   | 28.20899582 | 28.30247307 |
| Cap1    | -0.130134583 | 0.508922556 | 30.30736923 | 30.45522881 |
| Cap2    | -0.048529625 | 0.163172454 | 26.66166496 | 26.86064911 |
| Capg    | 0.176898479  | 0.531534427 | 25.33643723 | 25.55452728 |
| Capn1   | 0.00391674   | 0.005998625 | 24.03355408 | 24.51839256 |
| Capn2   | -0.017270088 | 0.035330008 | 28.45928001 | 28.63996315 |
| Capns1  | -0.039508343 | 0.09122921  | 28.28202248 | 28.63068962 |
| Caprin1 | -0.156851292 | 0.371160618 | 21.81354713 | 21.90418816 |
| Capza2  | -0.015239716 | 0.059368111 | 27.53860283 | 27.63899612 |
| Capzb   | -0.071054935 | 0.480536326 | 27.35110664 | 27.18034935 |
| Carhsp1 | 1.298843384  | 0.710817759 | 24.48499107 | 24.33626747 |
| Carkd   | 0.118932724  | 0.591731838 | 25.53647041 | 25.68386269 |
| Carkd   | -0.059309006 | 0.098940642 | 21.93052292 | 21.7424221  |
| Carm1   | 0.56560564   | 0.551686024 | 21.61328697 | 21.6714592  |
| Cars    | -0.311420918 | 0.186342894 | 20.52257729 | 18.92737007 |
| Casp8   | 0.457921982  | 0.350648365 | 21.17675972 | 21.40301704 |
| Casq1   | -0.114733696 | 0.08663952  | 27.33048248 | 28.20853043 |
| Cast    | 0.21156311   | 0.883358837 | 24.46276283 | 24.235569   |
| Cat     | -0.12440443  | 0.26473115  | 24.94650459 | 24.77525139 |

|          |              |             |             |             |
|----------|--------------|-------------|-------------|-------------|
| Cav1     | 0.095373154  | 0.669125612 | 29.26865578 | 29.27417755 |
| Cav2     | 0.105098248  | 0.372318573 | 25.93613815 | 25.72327805 |
| Cbr3     | -0.405020714 | 0.954713442 | 23.42687988 | 23.99645233 |
| Ccar1    | 0.363002777  | 0.418651873 | 21.82325935 | 21.6887207  |
| Ccar2    | -0.590852261 | 0.337612811 | 22.01621056 | 22.25675392 |
| Ccbl2    | 0.771899223  | 0.501791734 | 22.6835041  | 22.6566124  |
| Ccdc127  | -0.415537834 | 0.464739736 | 20.92702675 | 21.97337151 |
| Ccdc47   | 0.344362736  | 0.536014479 | 24.30785942 | 24.74452972 |
| Ccdc80   | 0.213381767  | 0.398251795 | 24.00213051 | 24.4889183  |
| Ccdc90b  | 0.290511608  | 0.240524759 | 24.98758888 | 25.49393272 |
| Ccny     | 0.70490551   | 0.555694323 | 21.22922897 | 22.14693642 |
| Cct2     | -0.049694538 | 0.183209285 | 27.78954887 | 28.00533485 |
| Cct3     | 0.010333538  | 0.032032764 | 27.3176899  | 27.52753448 |
| Cct4     | -0.123590469 | 0.432734309 | 26.59562492 | 26.92558289 |
| Cct5     | -0.167820454 | 0.862667473 | 27.44482231 | 27.57953072 |
| Cct7     | -0.112504482 | 0.503602681 | 26.90127182 | 27.0519619  |
| Cct8     | -0.131860733 | 0.541865095 | 26.61988831 | 26.56685829 |
| Cd109    | 0.23738718   | 0.427203094 | 26.39870071 | 26.47294426 |
| Cd151    | 0.076759815  | 0.056098176 | 23.99800301 | 23.71670151 |
| Cd163    | -0.147076607 | 0.260355716 | 22.48096657 | 22.29980659 |
| Cd200    | 0.195149422  | 0.491493958 | 25.54324341 | 25.55458641 |
| Cd2ap    | -0.011860847 | 0.019439366 | 23.89522743 | 23.18790054 |
| Cd34     | -0.194326878 | 0.619476994 | 24.95438004 | 24.39486313 |
| Cd36     | -0.076335907 | 0.147156037 | 27.28735924 | 26.96510124 |
| Cd44     | 0.194512844  | 0.095255095 | 22.37023354 | 22.60571289 |
| Cd47     | -0.0709548   | 0.236335757 | 24.27042007 | 24.20635223 |
| Cd81     | 0.21285677   | 1.272987144 | 27.90873337 | 28.18399811 |
| Cd9      | -0.149211407 | 0.174359826 | 26.12537956 | 26.2784729  |
| Cd97     | 0.00530386   | 0.019361564 | 24.56569672 | 24.58554649 |
| Cd99     | -0.302051544 | 0.363004819 | 20.17645454 | 19.79634666 |
| Cdc37    | 0.01881218   | 0.055538242 | 24.38284492 | 24.68805885 |
| Cdc42    | -0.059426308 | 0.281525726 | 27.08212852 | 27.31285286 |
| Cdc42bpb | -0.056244373 | 0.103571757 | 23.58806419 | 24.30584335 |
| Cdh6     | -0.031506062 | 0.052904709 | 21.06657791 | 21.41338348 |
| Cdipt    | -0.988401413 | 0.765938798 | 20.21430969 | 21.7654705  |
| Cdk13    | -0.21476984  | 0.096827207 | 19.19792557 | 21.75389099 |
| Cdk5     | 0.614443302  | 0.49408204  | 21.59545898 | 21.84176445 |
| Cds2     | -1.020140648 | 0.549986081 | 20.63287735 | 24.26284409 |
| Celf2    | -0.447123051 | 0.335696382 | 21.27861023 | 23.37225533 |
| Penpv    | 0.001819611  | 0.003197251 | 24.77097321 | 24.70112801 |
| Ces1c    | -0.154058933 | 0.458346371 | 27.93134308 | 27.3352623  |

|         |              |             |             |             |
|---------|--------------|-------------|-------------|-------------|
| Ces1d   | -0.331356049 | 0.516028978 | 29.28096008 | 29.27072906 |
| Cfb     | -0.373797894 | 0.619486998 | 24.39558411 | 23.94190025 |
| Cfd     | 0.233580589  | 0.080354483 | 24.10653496 | 23.25939941 |
| Cfh     | -0.029550076 | 0.107785963 | 27.8228054  | 27.75398064 |
| Cfi     | 0.530840874  | 1.134066229 | 23.88939095 | 23.14056969 |
| Cfl1    | 0.025596142  | 0.55581373  | 29.41691399 | 29.39754295 |
| Cfl2    | -0.075022221 | 0.26556109  | 25.27696419 | 25.14312553 |
| Chchd3  | -0.146456718 | 0.051355935 | 23.68624306 | 21.11737633 |
| Chchd6  | -0.164325714 | 0.220890167 | 23.63433647 | 24.09248924 |
| Chmp3   | 0.724585056  | 0.288898619 | 22.93975067 | 19.45580101 |
| Chmp4b  | 0.906894684  | 0.569020572 | 23.00935936 | 23.51725197 |
| Chst12  | 0.283240318  | 0.395586643 | 21.33984566 | 21.4772892  |
| Chtop   | 0.650859833  | 0.463028914 | 23.1517601  | 22.90697861 |
| Cisd1   | -0.291673183 | 0.846359063 | 24.63372803 | 25.01992226 |
| Ckb     | 0.090852261  | 0.668969102 | 30.63451958 | 30.63538551 |
| Ckm     | -0.974234104 | 0.421992126 | 26.04082489 | 26.48937607 |
| Clasp1  | -0.235426903 | 0.350820128 | 23.60512543 | 23.62789536 |
| Clcc1   | -0.891243935 | 0.45459546  | 20.34891129 | 22.82098389 |
| Clec10a | -0.514551163 | 0.233791129 | 22.35914803 | 21.64930534 |
| Clec3b  | 0.330034256  | 0.740842203 | 25.16422844 | 24.65594673 |
| Clic1   | -0.077071667 | 0.314516284 | 26.5544548  | 26.74829674 |
| Clic4   | 0.080552578  | 0.362476391 | 27.84906006 | 28.05522537 |
| Clint1  | -0.181238174 | 0.176177508 | 20.18422699 | 21.04733467 |
| Clptm1  | 0.364793301  | 0.241760595 | 21.79451561 | 21.92954826 |
| Cltb    | 0.073387146  | 0.037871026 | 23.06215286 | 22.79251099 |
| Cltc    | 0.015411377  | 0.088769184 | 30.65983009 | 30.75126839 |
| Clu     | -0.168105125 | 0.485946965 | 26.89942932 | 26.53259659 |
| Clybl   | -0.028868198 | 0.041621859 | 25.34173965 | 25.8680172  |
| Cma1    | 0.196232319  | 0.316257322 | 27.7983532  | 27.66091728 |
| Cmpk1   | -0.274219513 | 0.774428673 | 24.79887199 | 24.79496193 |
| Cnbp    | 0.214896679  | 0.729433838 | 23.94904518 | 24.38844109 |
| Cndp2   | -0.053713799 | 0.129932622 | 25.82868767 | 25.61414146 |
| Cnn2    | 0.308525562  | 1.079341723 | 28.30234337 | 28.69488144 |
| Cnp     | 1.226006985  | 0.576175433 | 23.625      | 23.60873795 |
| Cnpy2   | 0.280058861  | 0.639882447 | 22.26106453 | 22.15505219 |
| Cnpy4   | 0.243174553  | 0.138491263 | 22.83547401 | 22.45191574 |
| Coa3    | 0.351763725  | 0.185673788 | 22.67493248 | 22.32802963 |
| Coasy   | 0.41616106   | 0.649239506 | 22.62468719 | 23.31368256 |
| Col12a1 | 1.396833897  | 0.913237451 | 22.86107635 | 22.08987236 |
| Col1a1  | 0.167331696  | 1.065834766 | 33.8180275  | 33.66902542 |
| Col1a2  | 0.088726044  | 0.160805733 | 33.18681717 | 32.897892   |

|          |              |             |             |             |
|----------|--------------|-------------|-------------|-------------|
| Col2a1   | 0.142735481  | 0.318845877 | 31.08391762 | 30.69760132 |
| Col3a1   | -0.549921036 | 1.131730433 | 26.8411026  | 26.62547302 |
| Col4a1   | 0.031013012  | 0.195882743 | 30.81818008 | 30.84565544 |
| Col4a2   | 0.043800354  | 0.266752065 | 30.55270386 | 30.43489838 |
| Col4a4   | -0.510688305 | 0.166981162 | 23.25341034 | 20.10921288 |
| Col5a1   | 0.189917088  | 0.646718526 | 28.28797722 | 28.08217812 |
| Col5a2   | 0.092316628  | 0.709440543 | 27.8226223  | 27.70424652 |
| Col6a5   | 0.183423042  | 0.911865125 | 25.87011337 | 26.27676964 |
| Colgalt1 | 0.582501888  | 0.664241798 | 23.31132889 | 23.46886444 |
| Commd3   | -0.110738754 | 0.327015778 | 22.59902954 | 22.8869381  |
| Commd4   | -0.156558514 | 0.195456568 | 21.17318916 | 20.91012955 |
| Commd9   | -0.121246338 | 0.191712577 | 23.15778351 | 23.47654915 |
| Comt     | -0.105543613 | 0.278164126 | 24.29094887 | 24.69774055 |
| Comtd1   | 0.867017269  | 0.54436049  | 22.37552071 | 22.34770584 |
| Copa     | 0.073307514  | 0.173834344 | 26.55092239 | 26.93786621 |
| Copb1    | -0.181018353 | 0.881658384 | 26.05515289 | 26.1404171  |
| Copb2    | -0.06163311  | 0.147223864 | 23.81685066 | 24.44550133 |
| Cope     | -0.046069622 | 0.377284291 | 24.96230125 | 24.96000481 |
| Copg1    | -0.11427021  | 0.389947338 | 26.30270958 | 26.48205376 |
| Copg2    | -0.989785194 | 0.559504999 | 21.66738892 | 19.83529282 |
| Cops2    | -0.046397209 | 0.136695813 | 25.91090775 | 26.1863327  |
| Cops3    | -0.032067299 | 0.113140418 | 24.99455452 | 24.98541832 |
| Cops4    | -0.137800217 | 0.266340842 | 23.77565193 | 24.35137749 |
| Cops5    | -0.06323576  | 0.15859346  | 23.83325577 | 23.82104301 |
| Cops6    | 1.233935356  | 0.976278053 | 21.76263428 | 20.47058868 |
| Cops7a   | -0.23268795  | 0.731881194 | 23.57299805 | 23.52372742 |
| Copz1    | 0.033593178  | 0.054614523 | 22.71820641 | 23.08056831 |
| Coq10b   | 0.148429871  | 0.124078551 | 21.61481667 | 21.77076149 |
| Coq6     | -0.717856884 | 0.844272737 | 22.33076668 | 23.70081139 |
| Coq9     | -0.264202595 | 0.427443933 | 24.11402321 | 24.63311768 |
| Coro1a   | 0.027542591  | 0.068564951 | 22.63458061 | 22.49025345 |
| Coro1b   | 0.065253735  | 0.199227505 | 25.75468063 | 25.80579948 |
| Coro1c   | 0.092270851  | 0.777202061 | 28.01674843 | 28.05785942 |
| Cotl1    | -0.656263828 | 0.899723063 | 20.95155525 | 21.58109283 |
| Cox4i1   | 0.052263737  | 0.05396117  | 27.2703495  | 27.45489502 |
| Cox5a    | -0.083042145 | 0.104411562 | 28.78572083 | 28.83092499 |
| Cox5b    | 0.143768311  | 0.155356191 | 26.03151512 | 26.51504326 |
| Cox6a1   | -0.351594925 | 0.559301897 | 27.92382622 | 28.62044907 |
| Cox6b1   | 0.056001186  | 0.053900691 | 27.68163872 | 27.81451797 |
| Cox6c    | 0.062657833  | 0.071446287 | 26.10902786 | 26.27794075 |
| Cox7a1   | -0.234397888 | 0.121427897 | 26.1822834  | 26.47995949 |

|         |              |             |             |             |
|---------|--------------|-------------|-------------|-------------|
| Cox7a2  | -0.035969734 | 0.051087348 | 25.12340736 | 25.17714119 |
| Cox7c   | -0.128566265 | 0.164179679 | 24.51255798 | 24.49777412 |
| Cp      | 0.003232956  | 0.00813729  | 25.68805885 | 25.67959976 |
| Cpa3    | 0.076701641  | 0.117299914 | 28.01393127 | 27.79965019 |
| Cpe     | -0.115323067 | 0.536565636 | 23.6718483  | 23.80901909 |
| Cpne1   | -0.047725201 | 0.239691181 | 26.32003403 | 26.4998436  |
| Cpne2   | 0.014857292  | 0.028353625 | 22.56755447 | 22.40267754 |
| Cpne3   | -0.251984119 | 0.654692855 | 26.21737671 | 26.36108398 |
| Cpox    | 0.769266129  | 1.029433135 | 21.29888344 | 21.37363625 |
| Cpped1  | 0.130086899  | 0.064292588 | 22.75745583 | 22.24971199 |
| Cpq     | -0.122635365 | 0.275229897 | 24.27391052 | 24.36892891 |
| Cpsf6   | -0.067979813 | 0.107236887 | 25.01363182 | 25.77484894 |
| Cpsf7   | -0.342238426 | 0.934694418 | 23.48861122 | 23.86325073 |
| Cpt1a   | 0.095938683  | 0.187232676 | 24.33626747 | 24.57276726 |
| Cpt1b   | -0.049588203 | 0.030639104 | 25.18955994 | 25.28210068 |
| Cpt2    | -0.214389324 | 0.167882517 | 26.80291939 | 26.72090721 |
| Cr1l    | 0.848997116  | 0.272951562 | 19.46365547 | 23.58554649 |
| Crat    | -0.068255901 | 0.115229516 | 25.10848999 | 25.26029778 |
| Creld1  | 0.336287975  | 0.570060162 | 21.07711601 | 21.1196537  |
| Crip1   | 0.229366302  | 0.834227398 | 30.02762413 | 29.87926483 |
| Crip2   | -0.023108006 | 0.087295157 | 29.75995827 | 29.51793861 |
| Crk     | 0.061703682  | 0.154013305 | 24.96119881 | 25.15019417 |
| Crkl    | -0.703371048 | 0.473768012 | 22.80573654 | 20.44957733 |
| Cryab   | 0.069995403  | 0.141554005 | 25.22567558 | 25.29516029 |
| Cryl1   | -0.116388321 | 0.18187806  | 24.64735222 | 24.9092598  |
| Cryz    | 0.115751743  | 0.161737396 | 23.64746284 | 23.57172585 |
| Cs      | -0.072940826 | 0.108505817 | 29.95240974 | 30.18316841 |
| Csad    | -0.055038929 | 0.423403792 | 25.60102081 | 25.71235085 |
| Cse1l   | -0.172746658 | 0.499778376 | 27.08304214 | 27.69875908 |
| Csk     | -0.373658657 | 0.094679073 | 24.07871246 | 23.29501915 |
| Csnk1a1 | -0.526488304 | 0.417176593 | 22.69104385 | 22.37994003 |
| Csnk2a1 | -0.042280674 | 0.123500522 | 24.77006721 | 24.69285393 |
| Csnk2b  | 0.103713036  | 0.163577718 | 23.57819176 | 23.97788429 |
| Csrp1   | 0.148897171  | 0.370839499 | 30.09785652 | 29.67230988 |
| Csrp2   | 0.279573917  | 1.081923915 | 29.66510963 | 29.42145729 |
| Cst3    | -0.430748463 | 0.093118253 | 20.24684143 | 24.26334572 |
| Cstb    | -0.067324638 | 0.148133737 | 25.49838448 | 25.90841293 |
| Cstf2   | 0.285981178  | 0.472368939 | 23.2401619  | 23.59046555 |
| Ctbp1   | -0.116924763 | 0.338382459 | 24.85357666 | 25.20780373 |
| Ctcf    | -1.094777107 | 0.526880493 | 20.36894798 | 19.58022308 |
| Ctnna1  | 0.208731174  | 0.867740003 | 26.28705978 | 26.59348869 |



|           |              |             |             |             |
|-----------|--------------|-------------|-------------|-------------|
| Ctnna2    | -0.00507021  | 0.009042345 | 22.51835823 | 23.03316879 |
| Ctnna3    | -0.226282597 | 0.114475808 | 22.51523209 | 23.18522453 |
| Ctnnal1   | 0.042337894  | 0.060630537 | 23.78974915 | 23.70482635 |
| Ctnnb1    | 0.025350571  | 0.034530502 | 25.95681953 | 26.1867485  |
| Ctnnb11   | -0.754252434 | 1.118898021 | 20.9833889  | 19.86314583 |
| Ctnnd1    | 0.069756985  | 0.162586788 | 24.61194992 | 24.72769928 |
| Ctsb      | -0.09815836  | 0.244325537 | 25.8439064  | 25.64135551 |
| Ctsd      | -0.176429749 | 0.730778191 | 27.48792076 | 27.85934639 |
| Ctsh      | -0.050832272 | 0.148808404 | 24.27141953 | 24.13029861 |
| Ctnn      | 0.066232681  | 0.096135982 | 24.59622192 | 24.73923302 |
| Ctnnbp2nl | 1.162543774  | 0.696318842 | 21.97449303 | 22.9908371  |
| Cul1      | -0.217363834 | 0.204614172 | 22.64967728 | 21.68050194 |
| Cul3      | -0.120494366 | 0.261103492 | 22.68395233 | 23.10098076 |
| Cul4a     | 0.107190132  | 0.403648113 | 22.38255501 | 22.2994709  |
| Cul5      | -0.437201977 | 0.295447478 | 21.6438427  | 22.87408257 |
| Cuta      | 0.003725052  | 0.010333384 | 25.72145462 | 25.85043144 |
| Cutc      | -0.164737225 | 0.105260464 | 19.91231537 | 22.5797348  |
| Cxcl12    | 0.075733185  | 0.034282865 | 20.885746   | 22.73322296 |
| Cyb5a     | -0.506489277 | 1.115722446 | 24.30500793 | 25.37109184 |
| Cyb5b     | 0.310202599  | 0.75379391  | 23.82880974 | 23.35460854 |
| Cyb5r1    | 0.455872536  | 0.609233125 | 23.98468018 | 24.38093185 |
| Cyb5r3    | 0.134104729  | 1.163521182 | 30.09005165 | 29.99050713 |
| Cybc1     | -0.330804348 | 0.542533664 | 23.08516312 | 23.18213654 |
| Cyc1      | -0.065135956 | 0.092228197 | 27.15682411 | 27.40754509 |
| Cycs      | 0.155739307  | 0.229096441 | 27.36118507 | 27.50256348 |
| Cyfp1     | -0.033795357 | 0.094769597 | 25.92725754 | 25.98428917 |
| Cygb      | -0.421719551 | 0.820417519 | 24.69853401 | 24.70408821 |
| Cyp20a1   | -0.276651859 | 0.593185756 | 23.11122322 | 23.58726311 |
| Cyp2f2    | 0.22888279   | 0.125585396 | 21.67202187 | 21.75308609 |
| Cyp4b1    | 0.023000717  | 0.048325588 | 21.20329285 | 20.74648857 |
| D10Jhu81e | -0.024106026 | 0.049428022 | 27.49220657 | 27.99561119 |
| Daam1     | 0.137265205  | 0.053865924 | 22.23864746 | 22.42601013 |
| Dab2      | -0.107289791 | 0.75801393  | 22.65510559 | 22.60118484 |
| Dag1      | 0.224229813  | 0.910053174 | 26.58777809 | 26.26264763 |
| Dars      | 0.066120625  | 0.404607632 | 26.40304947 | 26.52454948 |
| Dazap1    | 1.386911869  | 0.991333882 | 22.18252945 | 21.55739975 |
| Dbi       | 0.25147438   | 0.512944864 | 27.30860519 | 27.51758194 |
| Dbnl      | 0.303606033  | 0.894095746 | 25.13606071 | 25.09083366 |
| Dbt       | -0.084015369 | 0.217132869 | 26.13586617 | 26.28489113 |
| Dcn       | 0.099228859  | 0.507567645 | 32.52710724 | 32.5931015  |
| Dcps      | -0.784836292 | 1.218805311 | 23.24295616 | 23.4832077  |

|        |              |             |             |             |
|--------|--------------|-------------|-------------|-------------|
| Dctn1  | 0.115978241  | 0.337463411 | 25.72777748 | 25.84804535 |
| Dctn2  | 0.051029205  | 0.135628481 | 26.50737953 | 26.4243679  |
| Dctn3  | 0.978607178  | 0.769952311 | 22.32794762 | 21.92860794 |
| Dctn5  | 0.11336422   | 0.088411626 | 21.60900879 | 21.23742294 |
| Ddah2  | 0.218298912  | 0.983448186 | 26.62030792 | 26.64828491 |
| Ddb1   | 0.048857212  | 0.205743598 | 25.13402557 | 25.25569534 |
| Ddhd2  | 0.117966652  | 0.10234521  | 21.84473228 | 20.69445229 |
| Ddost  | 0.179980755  | 0.966915402 | 27.06579018 | 27.17083359 |
| Ddrgk1 | -0.154101372 | 0.321270283 | 23.71208954 | 24.13547516 |
| Ddt    | -0.097459793 | 0.521333601 | 26.93966103 | 27.16920853 |
| Ddx1   | -0.02880621  | 0.085533299 | 26.75697327 | 26.88681221 |
| Ddx17  | -0.719148636 | 1.225128448 | 23.3013134  | 23.88836861 |
| Ddx21  | 0.659347057  | 0.507861524 | 22.2870369  | 22.6842308  |
| Ddx25  | 0.097173691  | 0.140251416 | 21.46238899 | 22.01998138 |
| Ddx39b | -0.161455631 | 1.140970881 | 27.16930389 | 27.19516563 |
| Ddx3x  | -0.008786678 | 0.034508151 | 27.16374969 | 27.3944397  |
| Ddx3y  | -0.230748653 | 0.439435139 | 23.46749687 | 24.30619049 |
| Ddx42  | 0.164587975  | 0.034454989 | 20.52866554 | 24.57721329 |
| Ddx5   | -0.064747334 | 0.200048095 | 26.80402756 | 27.01169395 |
| Ddx50  | 3.056016922  | 0.719881258 | 26.3973465  | 27.21141052 |
| Ddx6   | 0.010370255  | 0.021792734 | 22.44866753 | 22.81464195 |
| Decr1  | -0.002551079 | 0.004502291 | 28.3224678  | 28.56481743 |
| Dek    | -0.601313114 | 1.256628667 | 24.2437973  | 24.60540771 |
| Derl1  | 0.629016876  | 0.783430492 | 23.60229492 | 23.66242599 |
| Dhdh   | -0.079171658 | 0.234075309 | 24.41538429 | 24.6746521  |
| Dhrs1  | -0.144222736 | 0.560488413 | 24.04268265 | 24.13719559 |
| Dhrs7b | -0.625470638 | 0.401267733 | 19.52606773 | 22.32501221 |
| Dhx15  | -0.221403122 | 0.555030785 | 23.142519   | 23.80882263 |
| Dhx29  | -0.165678978 | 0.24103485  | 20.42506981 | 19.83699608 |
| Dhx9   | -0.173043728 | 0.5646067   | 26.51899338 | 26.89700699 |
| Diaph1 | -0.667241573 | 0.731527647 | 20.60094261 | 21.65913963 |
| Dkc1   | 0.18623209   | 0.428656602 | 22.83209801 | 22.44164467 |
| Dlat   | -0.097628117 | 0.157344301 | 28.62072754 | 28.81711197 |
| Dld    | -0.036375999 | 0.05476581  | 28.07331848 | 28.4271431  |
| Dlst   | 0.030176163  | 0.036973732 | 27.74746323 | 27.96691704 |
| Dmd    | 0.032982826  | 0.159054111 | 29.73439217 | 29.87158775 |
| Dmpk   | 0.456612587  | 0.673364109 | 23.11521339 | 23.98858643 |
| Dnaja1 | -0.079546452 | 0.072726577 | 23.89938354 | 24.39982605 |
| Dnaja2 | 0.140731335  | 0.347324196 | 24.52772903 | 24.54827881 |
| Dnaja3 | -1.326421738 | 0.6266212   | 23.11013985 | 23.79094124 |
| Dnajb4 | 0.14665699   | 0.374385333 | 25.75103188 | 25.8843441  |

|          |              |             |             |             |
|----------|--------------|-------------|-------------|-------------|
| Dnajc10  | -0.21524477  | 0.301767758 | 23.00207901 | 22.24249077 |
| Dnajc11  | 0.134235382  | 0.229034262 | 22.95221329 | 23.31299019 |
| Dnajc3   | -0.056228161 | 0.097203304 | 23.33742523 | 23.42111206 |
| Dnm1     | 0.632845879  | 0.643636237 | 21.49492264 | 21.78735924 |
| Dnm1l    | -0.078848362 | 0.384921072 | 26.69245529 | 26.84505653 |
| Dnm2     | -0.037050247 | 0.126670144 | 26.13700104 | 26.43313599 |
| Dock7    | -0.084240913 | 0.12382067  | 23.45287132 | 23.43987083 |
| Dpep1    | 0.018333435  | 0.045287818 | 28.62184525 | 28.20503807 |
| Dpp3     | 0.034862041  | 0.050763418 | 23.75246239 | 23.84143829 |
| Dpp7     | 0.03042078   | 0.053978567 | 21.68965912 | 21.95418549 |
| Dpy30    | -0.318422794 | 0.853310933 | 26.27326965 | 26.48861122 |
| Dpysl2   | 0.087738037  | 0.552639476 | 29.60376358 | 29.6468792  |
| Drap1    | 0.419731617  | 0.189920476 | 19.79514313 | 21.49511719 |
| Dst      | 0.005829811  | 0.003117317 | 21.23701477 | 21.92585945 |
| Dstn     | 0.053282261  | 0.157791745 | 31.12083626 | 31.21575737 |
| Dtd2     | 0.64063406   | 1.144578664 | 22.39715195 | 21.93437958 |
| Dtna     | 0.324570656  | 0.855473442 | 26.57758713 | 26.81164169 |
| Dusp19   | 0.111412525  | 0.330695412 | 28.26628876 | 28.52790833 |
| Dusp3    | -0.001640797 | 0.009097687 | 25.79911995 | 25.92406464 |
| Dync1h1  | -0.006140232 | 0.026962863 | 29.64607239 | 29.72487831 |
| Dync1i2  | 0.129072666  | 0.141307779 | 23.40093422 | 24.02495956 |
| Dync1li1 | 0.171361446  | 0.898278787 | 25.25385666 | 25.54698563 |
| Dynll1   | 0.033114433  | 0.171490119 | 27.49220657 | 27.84146118 |
| Dynlrb1  | 0.706539154  | 0.488721321 | 24.4800663  | 25.00667381 |
| Dynlt1   | 0.147241592  | 0.292696328 | 21.53919411 | 22.16582489 |
| Dynlt3   | 0.905399323  | 0.61916846  | 23.16643715 | 23.45575714 |
| Ech1     | 0.067955017  | 0.083978115 | 25.86540031 | 26.31357956 |
| Echdc2   | 0.135474682  | 0.274980816 | 20.05271721 | 20.25845146 |
| Echs1    | -0.096655369 | 0.183631368 | 27.93982887 | 28.17845154 |
| Eci1     | 0.033265114  | 0.035305912 | 28.24399757 | 28.42686462 |
| Eci2     | 0.081393242  | 0.168509626 | 23.97709846 | 24.68239021 |
| Ecm1     | -0.014993191 | 0.034400277 | 25.43249893 | 25.19812965 |
| Ecsit    | -0.271515846 | 0.559787177 | 21.524683   | 21.67934227 |
| Eef1a1   | 0.087480545  | 0.481849927 | 31.19929123 | 31.37331963 |
| Eef1b    | 0.119135857  | 0.526047393 | 26.88378525 | 26.52483177 |
| Eef1d    | 0.210659027  | 0.442323484 | 26.40509605 | 25.88439178 |
| Eef1e1   | 0.142960548  | 0.350554344 | 21.84640121 | 21.53431129 |
| Eef1g    | -0.122993946 | 0.408383695 | 27.33756065 | 27.61750793 |
| Eef2     | -0.05855608  | 0.317871056 | 29.67185593 | 29.83694077 |
| Efemp1   | -0.15218401  | 0.466276665 | 27.91245079 | 28.06507111 |
| Efemp2   | -0.044258118 | 0.187186395 | 26.99085808 | 27.15701675 |

|         |              |             |             |             |
|---------|--------------|-------------|-------------|-------------|
| Efhd1   | 0.040663242  | 0.097667066 | 24.16061783 | 24.01920128 |
| Efr3a   | -0.162278652 | 0.260115286 | 22.28571129 | 22.89287758 |
| Eftud2  | -0.240797043 | 0.71522585  | 24.41441727 | 24.25385666 |
| Egfr    | -0.050537109 | 0.056024357 | 24.13688278 | 23.62889671 |
| Ehbp1l1 | 0.067277431  | 0.155273297 | 22.82801437 | 23.30033684 |
| Ehd1    | 0.1646595    | 0.595695898 | 27.69119072 | 27.5547924  |
| Ehd2    | 0.005164146  | 0.022012234 | 31.8134861  | 31.92340851 |
| Ehd3    | 0.356059551  | 0.641295048 | 22.04056168 | 22.5114727  |
| Ehd4    | -0.041295052 | 0.245157235 | 28.39059067 | 28.3972168  |
| Eif2s1  | 0.322244644  | 1.027171281 | 24.76531982 | 24.51080894 |
| Eif2s3x | 0.018317223  | 0.039434179 | 24.33101273 | 24.61874199 |
| Eif3a   | -0.05309391  | 0.195480597 | 26.13412285 | 26.46906662 |
| Eif3b   | -0.21690321  | 0.51853654  | 23.83797836 | 23.6799221  |
| Eif3c   | -0.23903513  | 0.596408148 | 24.62561226 | 24.71847916 |
| Eif3d   | -0.08041048  | 0.143124843 | 23.71973228 | 24.3192749  |
| Eif3e   | -0.166686058 | 0.257191033 | 23.70049477 | 23.88212967 |
| Eif3f   | -0.412025452 | 1.258559575 | 26.0377903  | 26.14518738 |
| Eif3g   | 1.063074589  | 0.738478339 | 23.27810097 | 23.15835381 |
| Eif3h   | -0.297520638 | 0.071505027 | 23.31561852 | 19.46909523 |
| Eif3j1  | -0.028189659 | 0.050689574 | 23.56208992 | 23.21787262 |
| Eif3k   | -0.219656944 | 0.643811109 | 23.40691376 | 23.57207298 |
| Eif3m   | -0.028717041 | 0.063637051 | 24.11052132 | 24.39342499 |
| Eif4a1  | -0.061619282 | 0.267319903 | 27.45002556 | 27.71482849 |
| Eif4a2  | -0.006748199 | 0.015594619 | 24.31118965 | 24.10381699 |
| Eif4a3  | -0.239799023 | 0.506080168 | 24.98246193 | 25.23194885 |
| Eif4b   | -0.128510952 | 0.091521934 | 25.87055969 | 25.8475666  |
| Eif4e   | 0.323359013  | 0.876408181 | 23.01343727 | 23.50227356 |
| Eif4g1  | -0.303627014 | 0.522019708 | 24.01962471 | 24.41073418 |
| Eif4g2  | 0.428677559  | 0.902351477 | 24.12186813 | 24.26449203 |
| Eif4h   | -0.129153252 | 0.683849538 | 25.43698311 | 25.37560654 |
| Eif5    | 0.212378502  | 0.745842818 | 24.6105423  | 24.4274559  |
| Eif5a   | 0.069833279  | 0.349736258 | 27.46839905 | 27.44963074 |
| Elavl1  | 0.660917759  | 0.640720741 | 24.82624054 | 25.10573578 |
| Elovl1  | 0.145040512  | 0.22700213  | 24.67071533 | 25.3036499  |
| Emc1    | 0.26346159   | 0.748754315 | 23.9706192  | 23.64339447 |
| Emc8    | 0.078438759  | 0.063671119 | 22.83439445 | 21.60259056 |
| Emd     | 0.043158054  | 0.049528925 | 25.6537075  | 26.49414635 |
| Eml2    | 0.069220543  | 0.307407774 | 26.65239334 | 26.93303299 |
| Enah    | 0.140511513  | 0.424990134 | 27.30452156 | 27.54067421 |
| Endod1  | 0.103750706  | 0.34739706  | 26.72780228 | 26.96884155 |
| Eno1    | -0.017283916 | 0.052846447 | 29.91342163 | 29.89125252 |

|          |              |             |             |             |
|----------|--------------|-------------|-------------|-------------|
| Eno2     | 0.221944332  | 0.10175653  | 19.89756966 | 21.04526901 |
| Eno3     | -1.348907471 | 0.517143831 | 23.3066082  | 24.28862762 |
| Enpep    | 1.387796402  | 0.650406929 | 23.13381386 | 22.1692543  |
| Enpp1    | 0.099663734  | 0.199723312 | 23.76304054 | 24.06529617 |
| Enpp3    | -0.125246048 | 0.399530727 | 24.68383598 | 24.79971123 |
| Enpp4    | 0.065306664  | 0.116042658 | 21.44778633 | 21.4480381  |
| Entpd1   | -0.016931534 | 0.077758268 | 27.05682755 | 27.1399498  |
| Entpd2   | 0.08845377   | 0.547057062 | 29.26010895 | 29.27675247 |
| Epb41    | 1.088612556  | 0.796401136 | 23.67012024 | 23.49679947 |
| Epb41l2  | 0.116186619  | 0.227911151 | 25.281147   | 25.49838448 |
| Ephx1    | -0.026206493 | 0.110388955 | 28.53534317 | 28.81130409 |
| Ephx2    | -0.505263805 | 0.870489981 | 24.76915932 | 25.27223778 |
| Epn1     | 0.179525375  | 0.343178071 | 22.22125626 | 22.2835083  |
| Epn2     | -0.038054466 | 0.034695942 | 22.62609291 | 22.91239738 |
| Eppk1    | 1.090432644  | 0.774062089 | 22.69850349 | 22.89737129 |
| Eprs     | -0.03626585  | 0.271712711 | 26.4360466  | 26.42017937 |
| Eps15    | -1.180955887 | 0.863199052 | 21.87150955 | 21.16870308 |
| Eps8l2   | 0.792981148  | 0.612143271 | 19.89300728 | 21.74722672 |
| Erap1    | -0.134144783 | 0.099672359 | 21.16559601 | 23.29516029 |
| Erb2ip   | -0.127054214 | 0.11020091  | 20.83182716 | 21.2455101  |
| Ergic1   | 0.092006207  | 0.194276459 | 25.30326653 | 25.13430023 |
| Erp29    | 0.014099121  | 0.035218169 | 24.64834023 | 24.45676041 |
| Erp44    | 0.109712124  | 0.454607101 | 25.48271561 | 25.67521858 |
| Esd      | 0.083991528  | 0.956142594 | 28.00785065 | 28.09642601 |
| Esyt1    | 0.055150986  | 0.181645858 | 28.59665489 | 28.92119026 |
| Etf1     | -0.151554108 | 0.058063675 | 22.97601509 | 24.0077858  |
| Etfa     | -0.110780239 | 0.132874983 | 30.06303978 | 30.21847343 |
| Etfb     | 0.012453079  | 0.015524232 | 28.51194    | 28.43678474 |
| Etfdh    | -0.154636383 | 0.292973773 | 26.4772892  | 26.45843506 |
| Ethe1    | 0.151788712  | 0.186163908 | 25.09099579 | 25.57678032 |
| Exoc2    | 0.546858788  | 0.442929987 | 20.42481422 | 21.94395828 |
| Exoc6b   | -0.266280651 | 0.682954314 | 22.93992996 | 23.36999512 |
| F13a1    | -0.08232832  | 0.600305671 | 27.10419655 | 26.98119926 |
| F2       | 0.062363148  | 0.219748714 | 25.9862442  | 25.48443794 |
| Fabp3    | -0.032030106 | 0.026889771 | 25.14289284 | 25.06853867 |
| Fabp4    | -0.105353355 | 0.137264616 | 28.57967377 | 28.66661644 |
| Faf2     | -0.219882965 | 0.851185893 | 22.47516251 | 22.43086624 |
| Fah      | -0.094665527 | 0.233352012 | 25.79803085 | 25.97037697 |
| Fam114a1 | 0.215253353  | 0.561663876 | 23.87408257 | 24.02106667 |
| FAM120A  | 1.063603401  | 0.414245224 | 21.61295509 | 22.99986076 |
| Fam129a  | 0.123778343  | 0.646813882 | 27.57123566 | 27.53267097 |

|         |              |             |             |             |
|---------|--------------|-------------|-------------|-------------|
| Fam129b | 0.014713764  | 0.031967659 | 24.5182724  | 24.66476059 |
| Fam162a | 0.038000107  | 0.217317585 | 23.99152946 | 24.14156723 |
| Fam175b | -0.669087887 | 0.855625962 | 19.5257473  | 20.77015686 |
| Fam213a | -0.064660549 | 0.095759277 | 22.80291939 | 22.94922256 |
| Fam50b  | 0.034074783  | 0.087050057 | 26.0277462  | 25.90736008 |
| Fam98a  | -0.228487968 | 0.298494195 | 21.07894135 | 21.79249191 |
| Fam98b  | -1.641573906 | 0.91339272  | 22.67178345 | 20.3831234  |
| Farsa   | 0.074122906  | 0.177696925 | 25.07030106 | 25.30058098 |
| Farsb   | 0.0545578    | 0.119616503 | 24.32182312 | 24.44088364 |
| Fasn    | -0.265231133 | 0.326220602 | 29.91127968 | 30.80624199 |
| Fau     | -0.260846138 | 0.886597871 | 25.35319519 | 25.7816925  |
| Fbl     | -0.104809284 | 0.13316847  | 24.95118141 | 24.99321556 |
| Fblim1  | 0.109244823  | 0.559946954 | 30.0187664  | 30.24081802 |
| Fbln1   | 0.014970303  | 0.020082177 | 23.97989273 | 23.24656868 |
| Fbln1   | -0.733127117 | 0.274755123 | 23.97438812 | 19.31196785 |
| Fbln2   | 0.146187305  | 0.480727379 | 26.5435524  | 26.40194321 |
| Fbln5   | 0.057639122  | 0.448602199 | 32.55593109 | 32.58300018 |
| Fbn1    | -0.065778732 | 0.400934354 | 33.15394211 | 32.99797821 |
| Fbn2    | -0.057299137 | 0.100223767 | 24.56656837 | 24.61532021 |
| Fbxo2   | 0.389374256  | 0.623449167 | 22.10648537 | 22.71751595 |
| Fbxo30  | 0.938150406  | 1.086845519 | 22.15295029 | 22.64193916 |
| Fbxo6   | -0.663291931 | 0.427200567 | 20.9642334  | 22.66826057 |
| Fcgrt   | 0.13815403   | 0.052941013 | 23.71743202 | 23.89393234 |
| Fcho2   | -0.474270344 | 0.384042798 | 20.03705978 | 21.97868729 |
| Fdps    | -0.06191349  | 0.110124923 | 21.67297173 | 21.79594231 |
| Fermt3  | -0.378377438 | 0.24106613  | 23.80222893 | 24.03883743 |
| Fetub   | 0.340463161  | 0.627021632 | 22.88171959 | 22.1434536  |
| Fga     | 0.504131794  | 0.717084258 | 30.34064102 | 29.36026382 |
| Fgb     | 0.572722912  | 0.858643665 | 31.24496269 | 30.20244789 |
| Fgf1    | 0.220460892  | 0.144863143 | 21.99227333 | 22.55426407 |
| Fgg     | 0.410741806  | 0.59070137  | 31.30644417 | 30.44726753 |
| Fgl2    | -1.060919285 | 1.01794191  | 20.41739845 | 20.4780159  |
| Fh      | 0.051974297  | 0.073035742 | 28.57697487 | 28.87238121 |
| Fhl1    | 0.011892796  | 0.081771101 | 29.86444855 | 29.86680794 |
| Fhl3    | 0.299580097  | 0.691984954 | 24.44063187 | 24.17378998 |
| Filip1l | -0.168264866 | 0.331525612 | 25.04701805 | 25.64449501 |
| Fis1    | -0.028856754 | 0.165566525 | 26.35863876 | 26.44314766 |
| Fkbp10  | 0.283065796  | 0.810883835 | 24.07577896 | 23.71397781 |
| Fkbp2   | -0.332186222 | 0.859194468 | 23.94913483 | 23.84373856 |
| Fkbp3   | -0.779573917 | 0.335329455 | 22.89044762 | 20.56496048 |
| Fkbp4   | 0.132615566  | 0.226779965 | 24.59588051 | 24.46973419 |

|         |              |             |             |             |
|---------|--------------|-------------|-------------|-------------|
| Fkbp9   | -0.136005402 | 0.188874401 | 23.52133179 | 23.85528755 |
| Flii    | 0.007236481  | 0.016150174 | 26.57773209 | 27.02062225 |
| Flna    | 0.092729568  | 1.039025526 | 34.92362213 | 34.82373047 |
| Flnb    | 0.130073547  | 0.487769355 | 27.54973412 | 27.65253067 |
| Flot1   | 0.204302788  | 0.974187079 | 24.98489761 | 25.18812561 |
| Flot2   | 0.188123703  | 0.717680256 | 25.36916161 | 25.47144127 |
| Fmnl3   | 0.558428288  | 0.264964114 | 20.21497536 | 22.53300285 |
| Fmo1    | -0.081962109 | 0.486970584 | 26.91353607 | 27.01797104 |
| Fmo2    | -0.041926384 | 0.231287357 | 30.26595306 | 30.39335442 |
| Fmo3    | -1.139480591 | 0.949758802 | 23.65162849 | 23.37012672 |
| Fmod    | 0.275642872  | 0.667940983 | 26.80353546 | 26.88331985 |
| Fmr1    | -0.110060215 | 0.240297    | 20.56308746 | 21.09410095 |
| Fn1     | 0.260981083  | 1.175488573 | 31.98182487 | 31.69946289 |
| Fnta    | -1.321856022 | 0.727470133 | 20.33201218 | 23.26728058 |
| Folh1   | 0.151384354  | 0.05080718  | 22.6528759  | 22.12133026 |
| Fry     | -0.226841927 | 0.037600632 | 25.40295029 | 26.10045052 |
| Fstl1   | 0.073712826  | 0.160173015 | 23.28107452 | 23.04463577 |
| Fth1    | -0.157977104 | 0.7793167   | 26.77793694 | 26.87443542 |
| Fundc2  | -1.576900482 | 0.886647096 | 23.21870041 | 20.08012772 |
| Fus     | 0.001475334  | 0.001815754 | 25.00573158 | 24.70709419 |
| Fxr1    | 0.172223091  | 0.336388672 | 23.52205086 | 23.72640038 |
| G3bp1   | -0.236632347 | 0.730011536 | 24.85133743 | 25.28181839 |
| G3bp2   | 1.692518234  | 1.144241984 | 23.3198967  | 23.12831688 |
| G6pdx   | -0.024579525 | 0.074330991 | 26.23432541 | 26.55838776 |
| Gaa     | 0.334541798  | 0.428896963 | 22.00672531 | 22.55048752 |
| Gabarap | -0.028036118 | 0.014315004 | 20.33839417 | 21.67793846 |
| Gak     | 0.064891815  | 0.077468694 | 21.13433075 | 21.26504898 |
| Galk1   | 0.12311697   | 0.204530061 | 25.07206154 | 25.5908947  |
| Galm    | -0.106181145 | 0.215829611 | 22.52995682 | 22.82683182 |
| Gamt    | 0.200746059  | 0.461940956 | 23.59331894 | 23.49081612 |
| Ganab   | -0.166163445 | 0.924447958 | 27.5382328  | 27.72838783 |
| Gapdh   | -0.060293198 | 0.267313009 | 32.00068283 | 32.27844238 |
| Gars    | 1.853736877  | 1.094794739 | 23.94216919 | 23.04708481 |
| Gart    | -0.238458633 | 0.489065814 | 23.97709846 | 24.03296661 |
| Gbas    | -0.148548126 | 0.395858713 | 23.94100571 | 24.26327324 |
| Gbe1    | -0.145986557 | 0.283184221 | 22.87274933 | 23.49594688 |
| Gbp2    | -0.43089962  | 0.740592682 | 23.69678497 | 23.99765778 |
| Gc      | -0.21313858  | 0.787185338 | 28.31012344 | 27.95598793 |
| Gcat    | -0.251189232 | 0.642590566 | 21.59441185 | 21.66405487 |
| Gcdh    | 0.182087898  | 0.069179943 | 23.10828972 | 22.6117363  |
| Gcn1    | 0.004926205  | 0.010315889 | 24.42104721 | 24.48775291 |



|         |              |             |             |             |
|---------|--------------|-------------|-------------|-------------|
| Gdi1    | -0.048883438 | 0.26603617  | 27.06332207 | 27.2674942  |
| Gdi2    | 0.049740314  | 0.263334301 | 29.15759468 | 29.33898544 |
| Ggcx    | -0.033967972 | 0.026101456 | 21.12237358 | 21.26109314 |
| Gid8    | 0.475729465  | 0.917563875 | 23.09863663 | 23.18682671 |
| Gimap4  | 0.546303749  | 0.297518813 | 22.41441727 | 20.31601715 |
| Git1    | -0.230033398 | 0.833568091 | 22.82902145 | 23.27526093 |
| Git2    | 1.053547382  | 0.525417332 | 20.95965576 | 23.34095955 |
| Glg1    | 0.157552719  | 0.875086392 | 25.58571815 | 25.71887016 |
| Glo1    | 0.081397533  | 0.750373164 | 27.70536804 | 27.77152824 |
| Glod4   | 0.034009933  | 0.074295702 | 25.26895905 | 25.61624718 |
| Glrx    | -0.080267906 | 0.124141437 | 24.85362434 | 25.81264496 |
| Gltp    | -0.169753551 | 0.390128383 | 23.30424118 | 23.40236664 |
| Glud1   | 0.077620029  | 0.577843603 | 28.80654907 | 28.67475319 |
| Glul    | -0.432672024 | 0.607673326 | 25.38830948 | 25.59801292 |
| Glyr1   | -0.138494968 | 0.23528611  | 23.26785278 | 23.83855629 |
| Gmfb    | -0.0309062   | 0.012646357 | 21.02239227 | 23.61750793 |
| Gmppa   | 0.124222755  | 0.372912512 | 23.161726   | 23.53504562 |
| Gmppb   | 0.008634567  | 0.01846576  | 24.4667511  | 24.53070831 |
| Gmps    | 0.813362598  | 0.539254723 | 23.05316353 | 22.92565918 |
| Gna11   | 0.016092777  | 0.070568929 | 26.02123642 | 25.8901329  |
| Gna13   | -0.140210152 | 0.430496417 | 23.19096184 | 22.76805878 |
| Gnai1   | 0.188326359  | 0.524031741 | 23.62811852 | 23.24703407 |
| Gnai2   | -0.01351881  | 0.073325965 | 27.96620178 | 27.93550873 |
| Gnao1   | 0.401932716  | 1.290463818 | 25.81604385 | 25.74314308 |
| Gnao1   | 0.345319748  | 0.976858027 | 23.21102524 | 23.11985779 |
| Gnaq    | 0.145722389  | 1.127468855 | 26.01620674 | 26.07855034 |
| Gnas    | -0.132884026 | 0.800020957 | 25.85248184 | 25.94534302 |
| Gnb1    | -0.070222855 | 0.333594128 | 26.30455589 | 26.18046379 |
| Gnb2    | 0.116326332  | 0.534481373 | 27.81451797 | 27.70681763 |
| Gnb2l1  | -0.05505085  | 0.217438457 | 26.88261986 | 27.03149414 |
| Gnb4    | 1.555021286  | 0.714660016 | 20.75059128 | 23.76273727 |
| Gnpda2  | -0.51416254  | 0.378426779 | 20.29561806 | 22.35329056 |
| Gnpnat1 | -0.216300011 | 0.210204209 | 20.27584839 | 21.76453972 |
| Golga2  | 0.278148174  | 0.143352962 | 21.09448814 | 22.07372093 |
| Gorasp2 | 0.286891937  | 1.052763167 | 23.56488419 | 23.54179573 |
| Gosr2   | -0.262347221 | 0.160197351 | 21.14432526 | 20.77571297 |
| Got2    | -0.082381725 | 0.378087581 | 28.74957466 | 28.94815445 |
| Gp5     | 0.200482368  | 0.102954631 | 23.06899071 | 22.23321533 |
| Gpc4    | -1.700539589 | 1.196346569 | 20.27596474 | 19.53022575 |
| Gpd1    | -0.362633228 | 0.295192175 | 27.55691147 | 28.15272141 |
| Gpd1l   | -0.095249653 | 0.222451379 | 26.3537674  | 26.58849335 |

|         |              |             |             |             |
|---------|--------------|-------------|-------------|-------------|
| Gpd2    | -0.079981804 | 0.09594453  | 28.31324196 | 28.72789955 |
| Gpi     | 0.009307861  | 0.046671926 | 29.93297768 | 30.14673805 |
| Gpnmb   | -1.839092255 | 0.904303441 | 20.51623917 | 20.71952248 |
| Gps1    | 0.449738026  | 0.325274112 | 22.08173752 | 22.25361252 |
| Gpx1    | 0.106138229  | 0.540535051 | 28.54414177 | 28.69368553 |
| Gpx3    | -0.16533947  | 0.905113078 | 28.88273621 | 29.01573944 |
| Gpx4    | -0.148204327 | 0.355296516 | 23.84823608 | 24.03305054 |
| Gpx7    | 0.19753027   | 0.552507572 | 23.24580193 | 23.48885536 |
| Grb2    | -0.025794506 | 0.026794003 | 24.31215858 | 23.31699944 |
| Grhpr   | -0.131929398 | 0.331291335 | 26.54176712 | 27.09264946 |
| Grn     | 0.18861866   | 0.345723033 | 25.34177399 | 24.9718914  |
| Grpel1  | 0.044831276  | 0.017384471 | 22.15579414 | 22.51665115 |
| Gsk3a   | 0.115463257  | 0.054557864 | 21.8644619  | 22.17105865 |
| Gsk3b   | -0.01213932  | 0.057762353 | 22.88624954 | 22.79008675 |
| Gsn     | 0.228021622  | 1.204809427 | 30.50417328 | 30.35142326 |
| Gsn     | 0.047690392  | 0.088810556 | 23.76779556 | 24.3997612  |
| Gsr     | -0.019433975 | 0.037503278 | 24.81220436 | 25.12750626 |
| Gss     | -1.692577839 | 0.896160227 | 20.67372894 | 23.688591   |
| Gsta3   | -0.302276134 | 0.197917196 | 22.42272949 | 20.96564293 |
| Gstk1   | -0.14204216  | 0.864643896 | 25.47246361 | 25.55177307 |
| Gstm2   | -0.051552773 | 0.243669041 | 29.23233223 | 29.31291771 |
| Gstm5   | 0.028856277  | 0.077040417 | 24.5133419  | 24.39630127 |
| Gstm7   | -0.243318558 | 0.576157797 | 23.26913643 | 23.26298714 |
| Gsto1   | 0.068773746  | 0.268120662 | 23.48197746 | 23.86315727 |
| Gstp1   | -0.010990143 | 0.028948321 | 30.44608498 | 30.4841423  |
| Gstt1   | -0.234376431 | 0.853838137 | 27.34916878 | 27.67714119 |
| Gstt2   | -0.057165623 | 0.075066923 | 23.57276726 | 23.55414772 |
| Gstz1   | -0.393967628 | 1.072298914 | 25.02136421 | 24.93530655 |
| Gtf2i   | 0.436861038  | 0.130165338 | 23.63300705 | 23.42560005 |
| Gucy1a3 | -0.156480789 | 1.007126987 | 27.29245949 | 27.36919594 |
| Gucy1b3 | -0.021048546 | 0.036628821 | 25.4789257  | 26.09043121 |
| Gulp1   | 0.274913311  | 0.831008364 | 24.67276573 | 24.19670486 |
| Gyg1    | 1.108811855  | 0.628399588 | 23.43224335 | 23.29628181 |
| Gys1    | -0.410912991 | 0.461078287 | 21.9842968  | 22.35589981 |
| H1f0    | 0.102053165  | 0.37437955  | 29.04374695 | 28.76771355 |
| H2-Aa   | -0.76551342  | 0.775820775 | 20.35422516 | 20.34022713 |
| H2-D1   | -0.176886082 | 0.406712102 | 25.43669701 | 25.02301407 |
| H2-K1   | -1.509066582 | 0.964634243 | 19.46066284 | 22.62348175 |
| H2-Q10  | -0.433310509 | 0.764865821 | 24.19151878 | 23.27326965 |
| H2afv   | -0.192457199 | 0.718141754 | 27.6274929  | 27.02981186 |
| H2afy   | -0.20872736  | 0.895704033 | 28.25042725 | 28.38179016 |

|           |              |             |             |             |
|-----------|--------------|-------------|-------------|-------------|
| H2afy2    | 0.090472221  | 0.234140241 | 24.04159737 | 24.24959564 |
| H3f3a     | -0.244657993 | 0.648286038 | 31.88928795 | 32.35969162 |
| H6pd      | 0.091081619  | 0.139595235 | 23.9616394  | 23.63212013 |
| Hadh      | -0.21903801  | 0.311831827 | 29.63834    | 29.74979973 |
| Hadha     | -0.156888485 | 0.234272248 | 30.5229969  | 30.93417168 |
| Hadhb     | -0.080850124 | 0.090639789 | 29.69052505 | 29.99374962 |
| Hagh      | -0.189793587 | 0.524937957 | 22.66888809 | 22.64972115 |
| Hamp      | 0.31038475   | 0.801303612 | 22.85944557 | 22.82302666 |
| Hapln1    | -0.703884125 | 0.296798158 | 20.05722237 | 23.92913246 |
| Hars      | 1.521865845  | 0.800170824 | 24.64476967 | 24.5693531  |
| Hax1      | -0.269219875 | 0.462438302 | 21.01181602 | 21.09145546 |
| Hba       | -0.08118248  | 0.152551441 | 34.79105377 | 33.992939   |
| Hbb-b1    | -0.147515297 | 0.258541819 | 34.88212585 | 33.99175644 |
| Hbb-b2    | 0.227172852  | 0.154041313 | 26.76875496 | 25.25104141 |
| Hbb-bh1   | 1.052812576  | 1.118670565 | 22.95077324 | 22.52552032 |
| Hcfc1     | -0.034957886 | 0.066022023 | 23.72348595 | 24.1070137  |
| Hdac2     | -0.343112946 | 0.463907141 | 22.50460434 | 23.31271362 |
| Hdgf      | 1.00143671   | 0.386805598 | 24.42751884 | 24.59821129 |
| Hdgfrp3   | 0.259008408  | 0.363407341 | 25.13175201 | 25.56241035 |
| Hdhd2     | 0.936766148  | 0.582580411 | 24.50379181 | 24.68511963 |
| Hdlbp     | 0.156442165  | 0.71907329  | 25.46257591 | 25.47472382 |
| Hexa      | 0.06298399   | 0.346844894 | 23.20164871 | 23.37411308 |
| Hexb      | 0.505712509  | 0.545478899 | 21.26272011 | 21.99144363 |
| Hgs       | 0.133899689  | 0.306714255 | 21.90642738 | 21.56113434 |
| Hibadh    | -0.005980492 | 0.018339778 | 26.67559433 | 27.01818275 |
| Hibch     | 0.117986679  | 0.173222013 | 25.73166656 | 25.98361397 |
| Higd1a    | -0.099011898 | 0.167857824 | 21.36035347 | 21.85923767 |
| Hint1     | -0.084648609 | 0.755400379 | 27.80168724 | 27.70806694 |
| Hint2     | -0.00412035  | 0.011482461 | 24.94480705 | 24.99679565 |
| Hip1      | -0.336651325 | 0.460539171 | 24.51092911 | 24.63173103 |
| Hist1h1a  | -1.660927773 | 1.274505034 | 24.24510384 | 24.56801987 |
| Hist1h1b  | -0.524837971 | 1.275537185 | 25.58657646 | 25.91230202 |
| Hist1h1c  | -0.306052685 | 0.754364594 | 29.15583611 | 29.41354942 |
| Hist1h1d  | -1.43915987  | 0.566176073 | 23.61099243 | 21.41476822 |
| Hist1h1e  | -0.056037903 | 0.099230337 | 29.04739189 | 28.7107296  |
| Hist1h2ah | -0.525030136 | 0.223343404 | 24.05291557 | 25.41199493 |
| Hist1h2bp | -0.217025757 | 0.462815145 | 32.81657791 | 32.50308609 |
| Hist1h3a  | -0.036213875 | 0.063869456 | 29.88497925 | 30.05115891 |
| Hist1h3b  | -0.170877457 | 0.397061286 | 32.094841   | 32.07562256 |
| Hist1h4a  | -0.174758911 | 0.536921274 | 32.51789093 | 32.69235229 |
| Hist2h2ab | 0.037199497  | 0.065283538 | 23.79946518 | 23.55098152 |

|           |              |             |             |             |
|-----------|--------------|-------------|-------------|-------------|
| Hist2h2ac | -0.332463264 | 0.858110433 | 32.71616364 | 32.60939789 |
| Hk1       | 0.030592918  | 0.122888597 | 27.74464417 | 28.06486511 |
| Hk2       | 0.031122208  | 0.032202668 | 25.55045319 | 25.88012314 |
| Hmbs      | -0.236418247 | 1.079241466 | 22.52566338 | 22.79697227 |
| Hmgb1     | -0.284488201 | 1.110984218 | 29.41687393 | 29.28252983 |
| Hmgb2     | -2.304348469 | 0.744024055 | 21.11600494 | 19.45676804 |
| Hmgcl     | 0.033202171  | 0.055519855 | 23.48000526 | 23.89670563 |
| Hmgcs2    | -0.245805264 | 0.13519108  | 20.82036209 | 22.70617676 |
| Hmgn2     | 0.044405937  | 0.129424764 | 22.8589344  | 22.75242233 |
| Hmgn5     | 0.868988514  | 0.749843146 | 23.49838448 | 23.68709755 |
| Hmox2     | 0.494164467  | 0.211193921 | 23.82648277 | 23.0506916  |
| Hnrnpa0   | 0.471336842  | 0.32686004  | 21.95748329 | 21.63900566 |
| Hnrnpa1   | -0.135269642 | 0.435303733 | 24.92442703 | 25.18021774 |
| Hnrnpa2b1 | -0.031232357 | 0.07656081  | 28.15213966 | 27.80931282 |
| Hnrnpa3   | 0.084713936  | 0.222918071 | 28.39823723 | 28.15995407 |
| Hnrnpab   | -0.006546021 | 0.027701238 | 26.56891823 | 26.51401901 |
| Hnrnpc    | -0.047374249 | 0.104509762 | 24.81811905 | 24.73334885 |
| Hnrnpd    | -0.042480946 | 0.123259256 | 27.07785797 | 27.19413376 |
| Hnrnpdl   | 0.195519447  | 0.533884601 | 22.7858429  | 23.15568542 |
| Hnrnpf    | -0.285405159 | 0.712803463 | 24.93413544 | 25.23052025 |
| Hnrnph1   | -0.083388329 | 0.214327698 | 26.76407814 | 26.44197655 |
| Hnrnph2   | 0.224895954  | 0.427902508 | 24.02233696 | 24.24713516 |
| Hnrnpk    | -0.132106304 | 0.459972664 | 28.56015968 | 28.85424232 |
| Hnrnpl    | -0.004099369 | 0.008685732 | 27.52991867 | 27.63478088 |
| Hnrnppl   | 0.21228075   | 0.320945541 | 23.45838928 | 23.7091465  |
| Hnrnpm    | -0.113491058 | 0.542672966 | 26.93842697 | 27.21752548 |
| Hnrnpu    | -0.067111015 | 0.346231876 | 28.68849182 | 28.79398918 |
| Hnrnpul1  | 0.696953297  | 0.167892773 | 23.9900589  | 20.52280998 |
| Hnrnpul2  | -0.087050438 | 0.406195518 | 24.71816444 | 24.95615387 |
| Hook3     | 1.484453201  | 0.93089006  | 22.00370789 | 22.20732117 |
| Hoxd8     | -0.637834072 | 0.602628583 | 20.70288086 | 20.86423492 |
| Hp        | -0.745884895 | 0.307461548 | 22.42580414 | 20.24088097 |
| Hp1bp3    | -0.007847786 | 0.024108781 | 27.74970245 | 27.92677116 |
| Hpcal1    | -0.038732052 | 0.042489347 | 23.1678772  | 23.85176659 |
| Hprt1     | -0.351793289 | 0.511488665 | 23.25738716 | 24.42258835 |
| Hpx       | -0.167945385 | 0.421933949 | 28.22595978 | 27.79754829 |
| Hsbp1     | -0.04545784  | 0.009727636 | 20.09339142 | 24.48019028 |
| Hsd11b1   | -0.237752914 | 0.09185042  | 21.80369759 | 21.99992943 |
| Hsd17b10  | -0.012997627 | 0.035739029 | 28.12435532 | 28.20713425 |
| Hsd17b12  | -0.11417675  | 0.546028521 | 25.67583656 | 25.93559837 |
| Hsd12     | 1.72359705   | 0.994454746 | 23.70967293 | 24.19618034 |

|          |              |             |             |             |
|----------|--------------|-------------|-------------|-------------|
| Hsp90aa1 | -0.097835541 | 0.578936572 | 28.01350403 | 28.24163628 |
| Hsp90ab1 | -0.123443127 | 0.64789416  | 29.78509712 | 29.84719467 |
| Hsp90b1  | 0.048792362  | 0.164013032 | 29.52518463 | 29.5117321  |
| Hspa12a  | 0.396568775  | 0.645563204 | 24.10477638 | 24.31492805 |
| Hspa12b  | -0.023220539 | 0.060453198 | 25.77210808 | 25.80626678 |
| Hspa1a   | 0.031219959  | 0.169952287 | 29.11284447 | 29.17159653 |
| Hspa1b   | -0.716973305 | 0.411680471 | 24.65419769 | 21.88005638 |
| Hspa2    | -0.181988716 | 0.556987135 | 26.98315811 | 27.21039009 |
| Hspa4    | -0.026486874 | 0.125831183 | 27.6224041  | 27.67532539 |
| Hspa4l   | 0.217271805  | 0.450859462 | 23.79302788 | 24.1231308  |
| Hspa5    | -0.014383316 | 0.036091809 | 29.61433411 | 29.52232361 |
| Hspa8    | -0.007498264 | 0.049639832 | 30.95601654 | 30.9856987  |
| Hspa9    | -0.000939369 | 0.001657128 | 27.9596405  | 27.89486885 |
| Hspb1    | 0.03622961   | 0.158353892 | 29.94823837 | 29.88337708 |
| Hspb6    | 0.149028778  | 0.450838905 | 26.63394928 | 27.02083397 |
| Hspb7    | 0.307779312  | 0.940128366 | 25.40272331 | 25.22872353 |
| Hspb8    | -0.039201736 | 0.089994161 | 24.03414345 | 24.38686371 |
| Hspd1    | -0.115259171 | 0.43700781  | 29.71256828 | 29.86823654 |
| Hspg2    | 0.083109856  | 1.004842789 | 33.60774612 | 33.56422424 |
| Hsph1    | -0.037275791 | 0.106481424 | 24.69131088 | 24.80267334 |
| Htra1    | 0.206830978  | 0.564925892 | 27.38977051 | 27.27746201 |
| Huwe1    | -0.291837215 | 0.610481651 | 23.30883026 | 23.98693848 |
| Hyou1    | -0.126718044 | 1.013772941 | 26.40512848 | 26.47716713 |
| lah1     | -0.17766571  | 0.531982568 | 22.2980175  | 22.55595016 |
| lars     | 0.891998768  | 0.825099883 | 22.80764389 | 22.42370415 |
| lars2    | -0.11136961  | 0.322525546 | 26.2824192  | 26.52351761 |
| lcam1    | 1.418144226  | 0.729151903 | 21.89418983 | 22.62620354 |
| lcam2    | 0.6755867    | 0.405363041 | 20.86488342 | 22.93653679 |
| lde      | 0.202030659  | 0.23052903  | 22.84781647 | 22.78374672 |
| ldh1     | 0.008660316  | 0.025247479 | 27.35816956 | 27.7358284  |
| ldh2     | -0.138422012 | 0.483414034 | 29.33515549 | 29.50546265 |
| ldh3a    | -0.00012064  | 0.000129579 | 29.46524811 | 29.67123032 |
| ldh3g    | -0.072813034 | 0.074236193 | 27.12612915 | 27.37856865 |
| lfi35    | 0.10705328   | 0.105140253 | 22.00061798 | 21.74139404 |
| lgbp1    | 0.315267563  | 0.968897073 | 22.15690613 | 22.76670456 |
| lgfals   | -0.239654541 | 0.297682406 | 21.09526062 | 20.88223648 |
| lgfbp6   | -0.277768135 | 0.592514072 | 23.98320198 | 23.84018898 |
| lgfbp7   | 0.276018143  | 1.024477783 | 28.01361084 | 28.10454559 |
| lgh-3    | -0.70055294  | 0.836471359 | 25.79647255 | 24.7710247  |
| lghg1    | 0.820037842  | 0.500670119 | 23.05080795 | 21.09921646 |
| lgkc     | -0.548035622 | 1.077417529 | 26.0720005  | 25.35927582 |

|         |              |             |             |             |
|---------|--------------|-------------|-------------|-------------|
| lkbip   | 0.026838303  | 0.096583512 | 21.92317581 | 21.62506676 |
| lkbkb   | -0.40597105  | 0.558903984 | 20.67115784 | 21.55140495 |
| llf2    | -0.067592621 | 0.186214385 | 23.93093681 | 24.41589928 |
| llf3    | -0.379234791 | 0.211992552 | 23.07349205 | 20.70246696 |
| llvbl   | -0.230368137 | 0.112557955 | 21.23975372 | 21.28229141 |
| lmmt    | 0.099254608  | 0.283434527 | 28.00372696 | 28.03862953 |
| lmpa1   | -0.089402676 | 0.309736142 | 25.12155151 | 25.22044373 |
| lnf2    | -0.031744957 | 0.087298677 | 23.42803001 | 23.99222183 |
| lnmt    | -0.147054195 | 0.259674231 | 26.67532539 | 26.37466049 |
| lnpp1   | -0.122152805 | 0.457384612 | 24.28100395 | 24.56674194 |
| lnts3   | -0.021615982 | 0.011771903 | 20.33374214 | 21.10162163 |
| lpo4    | -0.130344868 | 0.087313407 | 21.68478775 | 21.87886047 |
| lpo5    | 0.268226147  | 0.922290255 | 25.84491348 | 26.07449341 |
| lpo7    | 0.004541874  | 0.005867087 | 24.21556473 | 24.64019775 |
| lpo9    | -0.093484402 | 0.049655843 | 20.84390831 | 23.02076149 |
| lqgap1  | 0.08523941   | 0.999362345 | 29.18595886 | 29.30317116 |
| lrf2bpl | 0.118895054  | 0.664823251 | 27.00785065 | 27.09164238 |
| lsg15   | -0.889184475 | 0.665600792 | 20.4726429  | 22.8999176  |
| lslr    | 0.175852299  | 0.259533567 | 27.18120384 | 27.75136375 |
| lsoc1   | -0.866475105 | 0.681441916 | 21.78680038 | 20.29142761 |
| lsoc2a  | -0.04929781  | 0.162776895 | 27.1662426  | 27.30817223 |
| lsyna1  | 0.059637547  | 0.043501817 | 22.32064056 | 23.01605797 |
| ltch    | 1.101051807  | 0.738662718 | 21.92542458 | 22.22608566 |
| ltga1   | 0.188559532  | 0.323032435 | 23.31160545 | 23.35366631 |
| ltga2b  | 0.53132534   | 0.3186259   | 25.12364388 | 24.27675247 |
| ltga3   | 0.082457542  | 0.289679705 | 26.03206253 | 26.20890236 |
| ltga5   | 0.002038956  | 0.009567023 | 25.87780762 | 25.8275013  |
| ltga6   | 0.530888557  | 0.196843893 | 19.27454185 | 22.12053871 |
| ltga8   | -0.018790245 | 0.064011694 | 30.22871399 | 30.25157928 |
| ltga9   | 0.223595142  | 0.731251933 | 25.79634857 | 25.92583084 |
| ltgav   | -0.06551075  | 0.340803136 | 27.44537544 | 27.36352539 |
| ltgb1   | 0.147577286  | 0.913432461 | 30.67261505 | 30.75198746 |
| ltgb3   | 0.180078506  | 1.192598921 | 25.33128738 | 25.26298714 |
| ltgb5   | 0.039982796  | 0.074659869 | 26.16999245 | 25.79191017 |
| ltgb6   | -0.076819897 | 0.281853267 | 26.52445984 | 26.80217934 |
| ltih1   | -0.271115303 | 0.625864912 | 25.97079468 | 25.80862617 |
| ltih2   | -0.337211609 | 0.437841645 | 24.84689903 | 24.42258835 |
| ltih4   | -0.223635674 | 0.735029684 | 25.31979179 | 24.8601284  |
| ltpa    | 0.108469009  | 0.173012979 | 24.73324394 | 24.88460159 |
| ltpr1   | -0.024681091 | 0.055221002 | 26.35670853 | 26.75468063 |
| ltpr3   | -0.094249725 | 0.334246089 | 23.10782814 | 22.85365295 |

|           |              |             |             |             |
|-----------|--------------|-------------|-------------|-------------|
| Ivd       | -0.337821484 | 0.831673693 | 26.81213188 | 26.8836689  |
| Jak1      | -0.244308949 | 0.498305974 | 22.62471008 | 23.10234261 |
| Jph2      | 0.073901176  | 0.125940573 | 23.6118927  | 24.3773613  |
| Jup       | -0.977134705 | 0.897340914 | 22.5522728  | 22.47640038 |
| Kank2     | 0.0120368    | 0.064663155 | 27.28224182 | 27.49990463 |
| Kars      | -0.051843643 | 0.127179147 | 24.61599541 | 24.88697433 |
| Katnal2   | -0.060902596 | 0.157282107 | 24.78830528 | 25.21852303 |
| Kcmf1     | 1.000825882  | 0.453967348 | 23.20356178 | 23.39532089 |
| Kcnk4     | -1.43139267  | 0.380601871 | 20.03161049 | 26.50087738 |
| Kdelc2    | 0.131997585  | 0.384992427 | 24.96022606 | 25.23976135 |
| Kdsr      | 0.016089439  | 0.007032476 | 22.68555832 | 21.16329002 |
| Khdrbs1   | -0.244519234 | 0.823620629 | 23.54321289 | 24.05531693 |
| Khsrp     | 0.059247971  | 0.158092808 | 25.64044571 | 25.3415699  |
| Kiaa0196  | 1.050205708  | 0.71690172  | 22.26040459 | 22.73291397 |
| Kif13a    | -0.125630856 | 0.208918063 | 22.69725227 | 23.11691093 |
| Kif3a     | -0.624766827 | 0.741620091 | 21.69629669 | 21.86476326 |
| Kif5a     | -0.110375404 | 0.113841967 | 23.85214806 | 23.90472031 |
| Kif5b     | -0.241363049 | 0.952145699 | 24.69407654 | 24.96380234 |
| Klc1      | -0.195312023 | 0.418440288 | 23.95278168 | 24.32251167 |
| Klk1b27   | -2.36823988  | 0.688268695 | 20.13703918 | 19.40500069 |
| Kmt2a     | -1.322288036 | 0.821006037 | 22.80388451 | 23.12254715 |
| Kng1      | -0.086666107 | 0.19734234  | 27.26901245 | 26.62226486 |
| Kpna4     | -0.167156696 | 0.444002745 | 24.89003944 | 25.16564751 |
| Kpna6     | -0.556573391 | 0.657185988 | 23.83903694 | 24.74750328 |
| Kras      | -0.08105135  | 0.235961066 | 24.41628647 | 23.96842384 |
| Krt81     | -5.238294601 | 1.129873852 | 24.12407875 | 20.9010334  |
| Krt83     | -3.170921803 | 1.026907289 | 23.24179268 | 21.49882126 |
| Krtap14   | -4.075039864 | 1.283253467 | 19.62823105 | 21.4608078  |
| Krtap15-1 | -3.451173306 | 1.193364088 | 20.68249893 | 20.63568115 |
| Krtap19-5 | -3.064190388 | 1.27250087  | 21.606884   | 19.24315834 |
| Krtap3-1  | -1.821218014 | 0.884989952 | 21.22794342 | 18.93153191 |
| Krtap7-1  | -4.039756298 | 0.68775221  | 25.0694828  | 20.55758476 |
| Ktn1      | -1.575419903 | 0.986237763 | 19.75471497 | 18.62550545 |
| L3hypdh   | -1.052731037 | 0.653710983 | 20.60993195 | 19.94429779 |
| Lactb2    | -0.829219818 | 0.420335446 | 23.09274673 | 22.11279869 |
| Lama2     | 0.275167465  | 0.555498381 | 26.13899231 | 26.12026596 |
| Lama4     | 0.045531273  | 0.174139525 | 28.52798271 | 28.38759422 |
| Lama5     | -0.018876553 | 0.092768693 | 29.83558655 | 29.85508919 |
| Lamb1     | 0.279755116  | 0.323390729 | 25.03178978 | 24.99403572 |
| Lamb2     | 0.00147438   | 0.005797338 | 30.77439117 | 30.61868095 |
| Lamc1     | -0.010967731 | 0.029406212 | 29.86067963 | 29.61487961 |



|         |              |             |             |             |
|---------|--------------|-------------|-------------|-------------|
| Lamp1   | 0.611097336  | 0.332642355 | 23.2424469  | 22.92940331 |
| Lamp2   | 0.014429569  | 0.044268062 | 24.65233994 | 24.75287056 |
| Lamtor1 | -0.008638859 | 0.005444454 | 23.47171974 | 23.17316437 |
| Lamtor5 | -0.807964325 | 0.578188234 | 22.22337723 | 23.64030838 |
| Lancl2  | -0.488975048 | 0.305206588 | 20.59902573 | 23.27710724 |
| Lap3    | 0.079027653  | 0.345665837 | 25.27895164 | 25.39715195 |
| Lars    | 0.579282761  | 0.700649865 | 21.01923561 | 21.05675697 |
| Lasp1   | 0.022983551  | 0.045865661 | 24.30674744 | 24.48246956 |
| Lcp1    | -0.457569122 | 1.143089635 | 24.46830559 | 24.81264496 |
| Ldb3    | 0.047653675  | 0.142720133 | 27.85578728 | 27.87061882 |
| Ldha    | -0.113595963 | 0.42133966  | 29.42119598 | 29.65440941 |
| Ldhb    | -0.145787716 | 0.525641332 | 27.14753914 | 27.50271416 |
| Lect1   | 1.745850563  | 1.093913755 | 24.04909706 | 24.54150009 |
| Lemd2   | 0.367120743  | 0.929596936 | 24.63212013 | 24.32930374 |
| Leprel2 | 0.164515972  | 0.415284447 | 21.38690186 | 21.56299973 |
| Letm1   | 0.096612453  | 0.207237427 | 25.97116852 | 26.26712036 |
| Letmd1  | 0.110895157  | 0.047197176 | 23.60523796 | 25.39845657 |
| Lgals1  | 0.176759243  | 1.061855564 | 31.9256382  | 31.81367683 |
| Lgals3  | 0.818135262  | 1.132743953 | 25.70255661 | 25.77140236 |
| Lgmn    | -0.317374229 | 0.401228267 | 23.32978249 | 22.20922661 |
| Lifr    | -0.13017416  | 0.232558839 | 27.18678665 | 26.35566711 |
| Limch1  | -0.223662853 | 0.451262078 | 23.61560249 | 24.10309601 |
| Lims1   | 0.038398266  | 0.255719169 | 27.2123394  | 27.37575531 |
| Lims2   | 0.064538479  | 0.247030958 | 26.45221138 | 26.67532539 |
| Lipa    | -0.437417507 | 0.655177122 | 21.5985527  | 22.69822693 |
| Lipe    | -0.550319672 | 0.694747835 | 26.16878891 | 26.23198509 |
| Lman1   | 0.262961388  | 0.650574716 | 25.76984024 | 25.70223999 |
| Lman2   | 0.245860577  | 0.459689756 | 24.16469002 | 24.35897446 |
| Lmcd1   | -0.037926197 | 0.186479361 | 28.79293442 | 28.67999649 |
| Lmf2    | 1.252511024  | 0.53817942  | 23.97035599 | 23.60206985 |
| Lmna    | 0.122790337  | 0.463292702 | 31.52840996 | 31.34408569 |
| Lmnb1   | -0.243190765 | 0.960589384 | 27.70563126 | 27.87355423 |
| Lmnb2   | 0.031430244  | 0.197643192 | 25.86076736 | 25.73347664 |
| Lmod1   | 0.066597462  | 0.295180072 | 28.304739   | 28.46041298 |
| Lnpep   | -0.179834366 | 0.550388866 | 24.40723801 | 24.66041374 |
| Lonp1   | -0.175330639 | 0.611198107 | 25.31468582 | 25.54939651 |
| Loxl1   | -0.025512218 | 0.147437348 | 30.18978119 | 29.99334526 |
| Loxl3   | 0.210427284  | 0.386378223 | 23.05284882 | 22.89141273 |
| Lpl     | 0.41982317   | 0.217041932 | 21.41364288 | 20.06941605 |
| Lpp     | 0.189660549  | 1.104615419 | 31.05484962 | 31.24246597 |
| Lrp1    | 0.03401947   | 0.252832196 | 28.13349724 | 28.19408607 |

|          |              |             |             |             |
|----------|--------------|-------------|-------------|-------------|
| Lrpap1   | 0.280653     | 0.900854118 | 24.69381142 | 25.00414658 |
| Lrpprc   | -0.041917324 | 0.185855994 | 26.36367607 | 26.40948868 |
| Lrrc17   | -0.05227232  | 0.073590163 | 28.02178764 | 28.40867996 |
| Lrrc39   | 0.49332428   | 1.117618913 | 22.76579475 | 22.88890839 |
| Lrrc40   | -1.270496368 | 0.642853951 | 24.31236649 | 24.36746407 |
| Lrrc4c   | 2.375864983  | 0.757559948 | 25.08172226 | 20.12498093 |
| Lrrc59   | -0.072156429 | 0.22229782  | 26.32890892 | 26.32784843 |
| Lrrfip1  | -0.011092663 | 0.020409429 | 25.33469963 | 25.13382912 |
| Lsm3     | 0.494785309  | 0.367846452 | 22.59882545 | 22.45480347 |
| Lsm5     | -0.413800716 | 0.261011121 | 21.89148712 | 19.87336349 |
| Lsm7     | 1.147771358  | 0.655568301 | 24.62572479 | 24.2228775  |
| Lta4h    | -0.078971386 | 0.451536042 | 27.19751167 | 27.37085915 |
| Ltbp1    | -0.183403492 | 1.191388783 | 28.53363609 | 28.51216698 |
| Ltbp2    | -1.506007671 | 0.737074371 | 20.41333199 | 19.64944267 |
| Ltbp3    | -0.021269321 | 0.0370323   | 23.83999634 | 24.15475845 |
| Ltbp4    | -0.12997961  | 0.723473776 | 30.74703217 | 30.63918686 |
| Luc7l2   | -0.581267357 | 0.253340933 | 22.0293808  | 22.22107887 |
| Luc7l3   | -0.051635265 | 0.065885549 | 23.06307602 | 23.14086533 |
| Lum      | 0.128063202  | 0.768348889 | 32.60831833 | 32.67629623 |
| Lxn      | 0.095737934  | 0.229482072 | 25.83612442 | 25.44404793 |
| Ly6a     | -0.259973526 | 0.681553897 | 23.35555077 | 23.16320038 |
| Ly6c1    | 0.097661495  | 0.181522227 | 24.36372566 | 24.58657646 |
| Lypla1   | -0.043151855 | 0.066585363 | 26.35129356 | 26.66234398 |
| Lypla2   | 0.011380672  | 0.017096223 | 24.85362434 | 24.87890816 |
| Lym5     | -0.086666107 | 0.097061623 | 20.66327286 | 21.37962341 |
| M6pr     | 0.717637062  | 0.89989619  | 24.30145454 | 24.93822479 |
| Macf1    | -0.430117607 | 0.698649369 | 24.20314407 | 24.72291374 |
| Macrocl1 | -0.128229618 | 0.363748007 | 25.58325195 | 25.9623909  |
| Man2c1   | -0.446096897 | 1.106659514 | 22.95530319 | 23.778162   |
| Manf     | 0.154394627  | 0.297551369 | 25.1764946  | 25.03204155 |
| Maoa     | -0.140217781 | 0.152045034 | 23.30507851 | 24.11179543 |
| Maob     | -0.141768456 | 0.901110493 | 26.55956841 | 26.7888031  |
| Map1a    | 0.523739815  | 0.462735549 | 25.05490303 | 25.83646202 |
| Map1b    | 0.240746975  | 0.888387974 | 27.94044495 | 28.05982018 |
| Map1lc3a | 0.354236126  | 1.224413256 | 24.06587219 | 24.34204483 |
| Map1lc3b | 0.297087193  | 0.774890301 | 24.85424232 | 24.82943916 |
| Map1s    | 0.017912388  | 0.020551489 | 22.33510971 | 23.29221344 |
| Map2k1   | -0.096850395 | 0.589120337 | 24.96767616 | 24.92075348 |
| Map2k3   | 0.358457565  | 0.323548325 | 21.83922768 | 22.18549728 |
| Map2k4   | 1.597585678  | 0.825593826 | 22.96185112 | 22.76775551 |
| Map3k19  | 0.845505714  | 0.410460714 | 23.8834362  | 23.64614296 |

|          |              |             |             |             |
|----------|--------------|-------------|-------------|-------------|
| Map4     | 0.06970787   | 0.178538543 | 26.4855442  | 26.44833946 |
| Map6     | 1.397093296  | 0.744960866 | 19.62213707 | 23.27398109 |
| Mapk1    | 0.138703823  | 0.227573665 | 26.18604851 | 26.09315491 |
| Mapk14   | -0.566809177 | 0.484390374 | 22.07107162 | 21.78640175 |
| Mapk3    | 0.284298897  | 0.600016304 | 24.40282059 | 24.75087929 |
| Mapre2   | 0.253111362  | 0.785015359 | 24.35083771 | 24.2854557  |
| Mars     | 0.965010643  | 0.41876881  | 20.78492928 | 22.86977959 |
| Marveld1 | -0.148269653 | 0.059956837 | 22.49850464 | 19.41157532 |
| Mat2a    | 0.181400776  | 0.14585433  | 22.61652184 | 22.27571487 |
| Matr3    | -0.05585289  | 0.137984287 | 26.62226486 | 27.06116104 |
| Mb       | -0.445954323 | 0.292569513 | 23.66242599 | 24.83740044 |
| Mbd2     | 0.500824928  | 0.359966373 | 21.88464737 | 22.06305885 |
| Mbl1     | -0.094364166 | 0.235818509 | 24.03590584 | 23.68901825 |
| Mbl2     | -0.422938347 | 0.28246702  | 21.62533379 | 21.13295174 |
| Mbnl1    | -0.067630291 | 0.144299242 | 24.99722672 | 24.9269619  |
| Mboat7   | 0.258487701  | 0.853808792 | 22.0290451  | 22.06825256 |
| Mbp      | 3.443705559  | 0.474648158 | 19.17723465 | 15.48871899 |
| Mccc1    | -0.151192188 | 0.436572333 | 25.34102821 | 25.39463425 |
| Mccc2    | -0.349367142 | 1.108508361 | 24.85195732 | 25.44887543 |
| Mcee     | -0.702640533 | 0.378163997 | 22.89454269 | 23.15804672 |
| Mcfd2    | 0.428349018  | 0.162178197 | 22.4201088  | 23.14507103 |
| Mcpt3    | 0.142730713  | 0.199980831 | 22.63049889 | 22.2681942  |
| Mcpt4    | 0.308060169  | 0.426685675 | 27.96911621 | 27.62561226 |
| Mcu      | -0.917449951 | 0.493229324 | 20.42300987 | 23.60433388 |
| Mdh1     | -0.052687645 | 0.15067249  | 28.58652687 | 28.61006355 |
| Mdh2     | -0.134683609 | 0.34033638  | 29.93058205 | 30.06046486 |
| Mdp1     | 0.511753559  | 0.461851816 | 23.34055138 | 23.48946953 |
| Me1      | -0.10766077  | 0.399022233 | 27.23516655 | 27.57751465 |
| Mecp2    | -0.207092762 | 0.60011674  | 24.90237617 | 25.4650383  |
| Mecr     | -0.02098465  | 0.020910454 | 25.62078476 | 25.96121979 |
| Megf6    | -0.243921757 | 0.101792758 | 22.74777985 | 20.666605   |
| Memo1    | 0.107573986  | 0.287847929 | 22.7440052  | 22.5797348  |
| Metap2   | -0.435365677 | 0.158178953 | 20.60490608 | 22.27403831 |
| Mfap2    | 0.011942387  | 0.020903924 | 25.84529495 | 25.51171494 |
| Mfap4    | -0.087651253 | 0.154011228 | 31.01038742 | 31.2536087  |
| Mfap5    | 0.015072346  | 0.020724053 | 26.99150848 | 26.64168549 |
| Mfge8    | 0.084208012  | 0.361669616 | 29.60121536 | 29.56699562 |
| Mfn2     | -0.696813583 | 0.337492301 | 22.88222313 | 22.56148529 |
| Mgp      | 0.008347988  | 0.018350181 | 24.27824211 | 24.28411484 |
| Mgst1    | -0.467947006 | 0.576421139 | 24.79907036 | 24.87539673 |
| Mgst3    | -0.061410904 | 0.053719818 | 22.13144493 | 22.65208817 |

|         |              |             |             |             |
|---------|--------------|-------------|-------------|-------------|
| Mical1  | -0.009108067 | 0.012215787 | 23.74816895 | 24.36472893 |
| Mical2  | 0.288770199  | 0.078617417 | 23.89217377 | 24.30820656 |
| Micall1 | 1.018857479  | 0.637990829 | 22.45671082 | 22.30215073 |
| Mif     | -0.027348518 | 0.127634649 | 27.85453987 | 28.02786255 |
| Minos1  | 0.285999298  | 0.614283019 | 24.74611855 | 25.22221375 |
| Mlec    | -0.54598856  | 0.439886548 | 20.75232697 | 22.44440269 |
| Mmaa    | 0.319930553  | 0.404539695 | 21.48044968 | 21.52171516 |
| Mmgt1   | 0.488736629  | 0.685115775 | 20.40520859 | 20.99313164 |
| Mms19   | -0.015387535 | 0.016547477 | 21.16263199 | 22.28990936 |
| Mns1    | 1.530734062  | 0.534584825 | 26.19730568 | 23.8451767  |
| Mogs    | -0.271672726 | 0.961889079 | 22.44685173 | 22.46587944 |
| Mp68    | 0.032416821  | 0.090450149 | 24.68346024 | 25.01077652 |
| Mpc1    | -0.325597286 | 0.555499748 | 24.95690727 | 25.37970924 |
| Mpc2    | -0.135727406 | 0.302792576 | 26.18391228 | 26.43809509 |
| Mpp1    | 0.058352947  | 0.068155373 | 24.43765068 | 23.38863754 |
| Mpst    | -0.01870966  | 0.036670751 | 22.90789604 | 22.1918354  |
| Mpz     | 2.557182312  | 0.816513741 | 26.03720474 | 23.52276993 |
| Mrc1    | 0.161303997  | 0.500513907 | 26.28439713 | 25.91077042 |
| Mrc2    | -0.182098389 | 0.702134258 | 22.66953659 | 22.87549019 |
| Mrgprf  | -0.331064224 | 0.275393703 | 23.20396423 | 23.53005219 |
| Mri1    | -0.127463341 | 0.04847976  | 23.91433334 | 24.16675949 |
| Mrpl12  | -0.433162689 | 1.065457582 | 22.43374634 | 21.58218575 |
| Mrps36  | -0.195793152 | 0.25028697  | 25.19411469 | 24.99886322 |
| Mrv1    | -0.194560528 | 0.360438687 | 23.55297661 | 23.91870689 |
| Msn     | 0.121212006  | 0.677627986 | 30.4152832  | 30.25518608 |
| Msra    | -0.417756557 | 0.149004429 | 23.72317505 | 19.64627457 |
| Msr3    | -0.189730644 | 0.39581075  | 25.13684464 | 25.00384521 |
| Mtap    | 0.020746231  | 0.073977428 | 26.11894035 | 26.28429222 |
| Mtarc2  | 0.01585865   | 0.039696485 | 24.96807098 | 24.84598923 |
| Mtatp8  | 0.016730785  | 0.062747754 | 25.89272881 | 26.12760544 |
| Mtch2   | -0.072988987 | 0.23917923  | 27.15585899 | 27.60900688 |
| Mtco2   | 0.108239174  | 0.133246858 | 28.97070694 | 29.38333702 |
| Mtfr1l  | -0.600682735 | 0.366775766 | 23.50190926 | 23.49643517 |
| Mthfd1  | 0.033802032  | 0.088038784 | 25.49786568 | 25.12518311 |
| Mthfd1l | -0.271491051 | 0.195519142 | 21.97046089 | 23.44897079 |
| Mtnd4   | -0.567676544 | 0.381721243 | 22.46918678 | 19.8863678  |
| Mtnd5   | -0.23272562  | 0.228603506 | 22.4169693  | 22.73723221 |
| Mtor    | 0.497853279  | 0.811629408 | 22.22293663 | 22.04393578 |
| Mtpn    | -0.059993744 | 0.272487743 | 27.04019737 | 27.19159508 |
| Mtx1    | -0.266900063 | 0.111621387 | 22.76395226 | 23.01969337 |
| Mtx2    | 0.03480196   | 0.065111165 | 24.71103859 | 24.80607033 |

|         |              |             |             |             |
|---------|--------------|-------------|-------------|-------------|
| Mug1    | -0.231517792 | 0.781494824 | 28.75792694 | 28.19394493 |
| Mut     | -0.081791878 | 0.122557645 | 23.96859932 | 23.89818382 |
| Mvp     | -0.003957748 | 0.01976361  | 26.89052773 | 27.00966644 |
| Myadm   | 0.2443223    | 0.802091401 | 24.72234154 | 24.53801155 |
| Mybbp1a | -0.289583683 | 0.768937685 | 24.94445038 | 24.98058891 |
| Mycbp   | 0.241936684  | 0.599849459 | 22.19838524 | 22.49228287 |
| Myd88   | -0.045521259 | 0.076780431 | 20.93128014 | 21.0633564  |
| Myg1    | 0.191912651  | 0.146461772 | 21.868536   | 22.34751701 |
| Myh10   | 0.001768589  | 0.010392259 | 30.03642845 | 30.10337067 |
| Myh11   | 0.139996529  | 0.635192074 | 34.66172028 | 34.42160416 |
| Myh11   | -0.006118774 | 0.008397252 | 23.36546326 | 23.00324631 |
| Myh14   | 0.156035423  | 0.262497861 | 26.9871769  | 26.59448624 |
| Myh4    | -2.018617153 | 0.366229019 | 22.79778481 | 24.0952282  |
| Myh9    | 0.055650234  | 0.332902641 | 29.14011955 | 28.97533417 |
| Myl1    | -0.472912788 | 0.240669194 | 26.70028305 | 26.58448601 |
| Myl12b  | 0.156806946  | 0.697625142 | 27.19281769 | 27.33756065 |
| Myl6    | 0.046937943  | 0.24173997  | 31.93029976 | 31.89439201 |
| Myl9    | 0.208859444  | 1.240568788 | 30.86326599 | 30.64022064 |
| Mylk    | 0.100126743  | 1.268739888 | 30.3348999  | 30.41336823 |
| Myo18a  | 1.109720707  | 0.468092091 | 20.31375504 | 23.07706642 |
| Myo1a   | -0.096738815 | 0.037275167 | 21.21936798 | 23.30410194 |
| Myo1c   | 0.110252857  | 0.951634683 | 30.19519043 | 30.2720871  |
| Myo1d   | -0.022123337 | 0.038153145 | 25.15657425 | 25.44663811 |
| Myo9b   | 0.345799446  | 0.563773203 | 21.81686974 | 21.71703529 |
| Myof    | 0.102907181  | 0.483886787 | 27.34214783 | 27.44387436 |
| N/A     | 0.291443348  | 0.756373344 | 23.12995338 | 23.48983574 |
| N/A     | 0.017683506  | 0.020434674 | 20.9619751  | 20.4247036  |
| N/A     | -0.234057426 | 0.73395729  | 24.12888336 | 24.48031425 |
| N/A     | -0.288837433 | 0.569367832 | 28.14535332 | 27.82444572 |
| N/A     | -0.407013893 | 0.469372586 | 24.12888336 | 23.93048668 |
| N/A     | -0.442372322 | 0.307218305 | 24.91757011 | 24.24154472 |
| N/A     | -0.506009579 | 0.612778432 | 22.95843887 | 22.99439812 |
| N6amt1  | 0.461749077  | 0.258606004 | 20.81169128 | 22.72429848 |
| Naa15   | -0.727341652 | 0.636570049 | 20.50381088 | 21.65800667 |
| Naalad2 | 0.279420853  | 1.020606164 | 24.91861725 | 25.20250893 |
| Naca    | 0.074637413  | 0.103896212 | 23.99740028 | 25.11433983 |
| Nae1    | 0.432528496  | 0.284701601 | 21.03965759 | 22.76585579 |
| Naga    | -0.259925842 | 0.46836236  | 23.97543716 | 24.45557022 |
| Nampt   | 0.081120014  | 0.205341964 | 25.04000854 | 25.1188221  |
| Nap1l1  | 0.061984062  | 0.329559984 | 25.60223961 | 25.74980545 |
| Nap1l4  | -0.062837124 | 0.297063736 | 24.85462189 | 25.10868835 |

|         |              |             |             |             |
|---------|--------------|-------------|-------------|-------------|
| Napa    | 0.221674442  | 0.743922727 | 24.7490387  | 24.66215324 |
| Naprt   | -0.260052681 | 0.396427666 | 23.13062859 | 23.17144012 |
| Nars    | 0.078588486  | 0.160109298 | 23.46625328 | 24.05415916 |
| Ncald   | 0.854136467  | 0.663766605 | 22.30838776 | 22.03553581 |
| Ncam1   | 0.212423801  | 0.538177077 | 25.89020157 | 25.90536308 |
| Nceh1   | -0.491277695 | 0.148681886 | 19.66902351 | 23.90407753 |
| Nckap1  | 0.121566772  | 0.422705049 | 24.87829971 | 25.1240387  |
| Ncl     | -0.136611938 | 0.640614266 | 27.01563263 | 27.15112495 |
| Ncln    | 0.204990864  | 0.266355354 | 22.9117775  | 22.74038696 |
| Ndrg1   | 0.365174294  | 0.805079046 | 25.30966377 | 25.8528862  |
| Ndrg2   | -0.071869373 | 0.176256663 | 26.88005257 | 27.24318123 |
| Ndufa1  | -0.159780502 | 0.106817297 | 21.86143494 | 22.47758675 |
| Ndufa10 | -0.035879612 | 0.072492864 | 26.85233879 | 27.049263   |
| Ndufa11 | -0.723229885 | 0.798748775 | 21.537323   | 23.10856056 |
| Ndufa12 | -0.081252575 | 0.105452249 | 24.89008713 | 25.40051079 |
| Ndufa13 | -0.005791664 | 0.010224132 | 24.75123596 | 25.11187553 |
| Ndufa2  | 0.227889538  | 0.29926334  | 22.65368462 | 23.44139099 |
| Ndufa3  | 0.457859516  | 1.032911491 | 24.4998436  | 24.8773632  |
| Ndufa4  | -0.079559326 | 0.096852212 | 26.57873917 | 26.82432365 |
| Ndufa5  | 0.842504025  | 0.386610138 | 22.93560219 | 23.67766571 |
| Ndufa6  | -0.134500504 | 0.285182551 | 25.0277462  | 25.2437973  |
| Ndufa8  | 0.153457165  | 0.175408938 | 26.39886475 | 26.43346977 |
| Ndufa9  | -0.110751629 | 0.341598021 | 26.13541603 | 26.41104126 |
| Ndufaf4 | 0.653853416  | 0.565432512 | 21.79534912 | 21.94438744 |
| Ndufaf7 | -0.285532475 | 0.510818917 | 19.99658394 | 20.73360825 |
| Ndufb1  | -0.018470287 | 0.030483538 | 25.56497002 | 25.88208389 |
| Ndufb10 | 0.067773819  | 0.083756938 | 25.51123238 | 25.5182724  |
| Ndufb3  | -0.013975143 | 0.018242993 | 23.98979759 | 24.25673866 |
| Ndufb4  | -0.839618206 | 0.340001441 | 25.12218285 | 25.2457943  |
| Ndufb5  | -0.345545292 | 0.322720555 | 23.11230469 | 23.46787071 |
| Ndufb6  | 0.868642807  | 0.673553001 | 22.97354698 | 23.3303299  |
| Ndufb7  | 0.059812546  | 0.021651853 | 23.69029808 | 23.97727394 |
| Ndufb9  | -0.081052303 | 0.105727522 | 24.63405991 | 25.19099236 |
| Ndufc2  | -0.000195503 | 0.000297623 | 24.9586792  | 25.29631615 |
| Ndufs1  | -0.071464062 | 0.101886649 | 27.26579666 | 27.63630295 |
| Ndufs2  | 0.006774902  | 0.012864895 | 26.76862907 | 26.76673508 |
| Ndufs3  | -0.113228798 | 0.161857146 | 25.88553238 | 26.0739212  |
| Ndufs4  | 0.786414623  | 0.474320704 | 24.46575546 | 25.0091114  |
| Ndufs5  | 1.268167496  | 0.442770824 | 25.07806015 | 25.39486313 |
| Ndufs6  | 0.926928043  | 0.229325477 | 23.91031265 | 23.85861206 |
| Ndufs7  | 0.26959753   | 0.537652145 | 24.92723465 | 25.42761612 |

|        |              |             |             |             |
|--------|--------------|-------------|-------------|-------------|
| Ndufs8 | 0.185089588  | 0.357488591 | 25.54942513 | 25.91586113 |
| Ndufv1 | 0.12008667   | 0.17284467  | 26.95160484 | 27.22811699 |
| Ndufv2 | 0.100402355  | 0.142854479 | 25.01154327 | 24.87417603 |
| Ndufv3 | 0.032056332  | 0.044249645 | 21.49267387 | 21.02052498 |
| Nebi   | 0.151679993  | 0.037487561 | 19.6319561  | 23.86655617 |
| Nedd4  | 0.06519556   | 0.32508884  | 26.86053085 | 26.84744835 |
| Nedd8  | -0.809409618 | 0.946438283 | 23.76405334 | 24.52850342 |
| Nefm   | 2.341698647  | 0.643909903 | 21.06552696 | 20.01495171 |
| Nelfcd | 0.10026741   | 0.121467738 | 27.51050758 | 26.8766613  |
| Nes    | -0.160932064 | 0.383110096 | 23.34204483 | 23.2609787  |
| Nexn   | -0.013329506 | 0.036350882 | 22.96858215 | 22.8894825  |
| Nfib   | 0.040197372  | 0.022659248 | 22.49472618 | 21.29754066 |
| Nfic   | 0.273478985  | 1.26388358  | 22.75759888 | 22.43852615 |
| Nfix   | 0.299719334  | 0.748453715 | 24.23950768 | 24.2540741  |
| Nfu1   | 0.200421333  | 0.35904353  | 22.37260056 | 23.23407745 |
| Ngef   | 0.042678356  | 0.079252868 | 23.05319786 | 23.41969872 |
| Nhp2l1 | -0.130513668 | 0.184951434 | 24.23432541 | 24.09095573 |
| Nid1   | 0.217837811  | 0.815020018 | 28.72546387 | 28.5209198  |
| Nid2   | 0.050275803  | 0.134245688 | 26.45639992 | 26.26277161 |
| Nif3l1 | -0.353191376 | 0.839179504 | 21.81819725 | 22.6170826  |
| Ninj1  | 0.238433361  | 0.594675942 | 24.25089836 | 24.04218292 |
| Nit1   | -0.049796581 | 0.183087243 | 24.74149704 | 24.68029785 |
| Nit2   | -0.145010948 | 0.332498613 | 30.60310936 | 30.70981026 |
| Nlrx1  | 1.087310314  | 0.578005808 | 23.1593399  | 21.28506851 |
| Nme1   | 0.089560032  | 0.510515835 | 25.01869202 | 24.82444572 |
| Nme2   | 0.057051182  | 0.20548182  | 28.77542686 | 28.57416153 |
| Nme3   | 0.210373402  | 0.164669105 | 21.58224106 | 21.8669529  |
| Nmral1 | 0.179624081  | 0.07663794  | 22.15514565 | 22.53442955 |
| Nmt1   | 0.133278847  | 0.249770888 | 24.51851273 | 25.0953083  |
| Nnt    | 0.01969862   | 0.07478349  | 26.92897415 | 27.08405685 |
| Nono   | -0.383267403 | 0.593731601 | 25.46522522 | 25.55499649 |
| Nop58  | -0.000440598 | 0.001019444 | 23.43478966 | 23.6686058  |
| Nov    | 0.125854492  | 0.302007633 | 25.26967239 | 25.00658798 |
| Npepl1 | -0.844683647 | 0.241497332 | 23.86976051 | 23.73510551 |
| Npepps | 0.01970911   | 0.088777497 | 25.97338104 | 26.22565651 |
| Npm1   | 0.278305054  | 0.928872992 | 26.28816986 | 26.4522419  |
| Npnt   | -0.148953438 | 0.820897548 | 29.40423965 | 29.3118782  |
| Npnt   | -0.265904903 | 0.445073589 | 24.53391838 | 23.88241005 |
| Nptn   | 0.118142128  | 0.848410376 | 25.59753036 | 25.52668381 |
| Nqo1   | 0.06477499   | 0.47428991  | 24.79694366 | 24.83855629 |
| Nqo2   | -0.252167702 | 0.81591782  | 23.9557991  | 23.70281982 |



|         |              |             |             |             |
|---------|--------------|-------------|-------------|-------------|
| Nsf     | -0.377810955 | 0.686783074 | 23.99938011 | 24.60229492 |
| Nsfl1c  | 0.019639492  | 0.033897745 | 24.63189697 | 23.95064735 |
| Nt5c    | -0.141360283 | 0.396172999 | 25.26072884 | 25.50727463 |
| Nt5e    | -0.659063339 | 0.320989861 | 21.25734138 | 23.86221123 |
| Ntn1    | -0.10215044  | 0.464290697 | 25.92849922 | 25.91729736 |
| Nucb1   | -0.05567646  | 0.161750925 | 25.09571075 | 24.80301857 |
| Nucb2   | 0.042910576  | 0.086450066 | 22.83171082 | 22.66405487 |
| Nudc    | -0.04365778  | 0.24933042  | 24.62739563 | 24.7470932  |
| Nudt11  | -0.534310341 | 0.429016279 | 22.22042847 | 22.58820152 |
| Nudt16  | 0.920001507  | 0.464247369 | 22.53772736 | 22.95884705 |
| Nudt18  | -0.111361504 | 0.28085707  | 20.59103584 | 20.96662903 |
| Nudt21  | -0.179591656 | 0.517263312 | 24.76319313 | 24.77459717 |
| Nudt6   | -0.222826004 | 0.526254018 | 23.79530907 | 24.41422272 |
| Nudt7   | -0.095087051 | 0.102389504 | 20.25626373 | 21.55744743 |
| Numa1   | -0.462292671 | 0.735047878 | 23.58083916 | 22.8772316  |
| Nup133  | -0.246746063 | 0.503176179 | 22.88684464 | 22.83120918 |
| Nup155  | 0.176154137  | 0.184236313 | 21.68675613 | 21.71695137 |
| Nup160  | -0.117238045 | 0.101272918 | 22.49645805 | 22.06361961 |
| Nup93   | 0.336549759  | 0.329046375 | 22.28212166 | 21.47516251 |
| Nutf2   | 0.207271576  | 0.919873427 | 26.87208748 | 27.00891876 |
| Nynrin  | -0.232080936 | 0.530430182 | 25.32896042 | 25.48062134 |
| Oat     | 0.074504852  | 0.382760468 | 27.95299339 | 28.25691986 |
| Ociad1  | -0.000459671 | 0.000121727 | 18.49855995 | 23.24331856 |
| Ogdh    | -0.019624233 | 0.022536647 | 29.85456848 | 30.18435287 |
| Ogn     | 0.093150139  | 0.579844778 | 32.49961853 | 32.36304092 |
| Ola1    | 0.031775951  | 0.121762997 | 26.04545593 | 26.36304092 |
| Omd     | 0.424599648  | 0.86141183  | 25.48225403 | 26.20841789 |
| Opa1    | 0.034185886  | 0.077778559 | 25.56427383 | 25.82128525 |
| Orm1    | -0.193552494 | 0.51104724  | 24.4497261  | 24.01563263 |
| Osbp    | 0.347324371  | 0.850952442 | 23.74693871 | 24.1479454  |
| Osbpl11 | -0.879416466 | 0.835642301 | 22.20164871 | 20.19979858 |
| Osbpl3  | -0.237632751 | 0.15900848  | 23.05458832 | 23.30730247 |
| Osbpl9  | 0.047013283  | 0.108132724 | 22.33068466 | 22.58865929 |
| Ostc    | -0.047912121 | 0.139519268 | 24.48068237 | 24.18888092 |
| Ostf1   | 0.047071934  | 0.087387614 | 25.31053162 | 25.53510666 |
| Otub1   | -0.03831768  | 0.142649025 | 26.20342445 | 26.19584274 |
| Oxct1   | 0.094892502  | 0.408160632 | 28.3740139  | 28.58050156 |
| Oxsr1   | 0.125287533  | 0.964321459 | 23.71156311 | 23.70514297 |
| P4hb    | 0.051568985  | 0.310014895 | 28.84322929 | 28.86782455 |
| Pa2g4   | -0.186274052 | 0.451626312 | 24.5973587  | 24.57525253 |
| Pabpc1  | -0.017221451 | 0.053070339 | 26.54683685 | 26.7551899  |

|          |              |             |             |             |
|----------|--------------|-------------|-------------|-------------|
| Pabpn1   | 0.778682232  | 0.238536271 | 23.25896835 | 22.61117172 |
| Pacsin2  | 0.090332508  | 0.337006815 | 25.58020592 | 25.49283409 |
| Pafah1b1 | -0.136503696 | 0.105470431 | 23.86806488 | 23.50385284 |
| Pafah1b2 | -0.258474827 | 0.916656998 | 25.82517433 | 26.03632545 |
| Paics    | -0.032139301 | 0.061415768 | 24.36619759 | 24.83069611 |
| Pak2     | 0.205796719  | 0.199860025 | 24.3566246  | 24.82133484 |
| Palm     | 0.03800869   | 0.104290291 | 23.08577919 | 22.99095917 |
| Paox     | 0.43469286   | 0.29391205  | 20.66980743 | 23.10299873 |
| Papln    | 0.632527828  | 0.469235855 | 23.46774673 | 23.43834877 |
| Papss2   | -0.276792526 | 0.770526588 | 23.64844894 | 23.81528664 |
| Park7    | -0.157483101 | 0.869660683 | 28.69885826 | 28.83656502 |
| Parp12   | 0.61542654   | 0.697306949 | 20.27172661 | 20.243536   |
| Parp3    | -0.297847748 | 0.515267218 | 24.39159012 | 25.42040443 |
| Parva    | 0.050222397  | 0.236668839 | 27.88896179 | 28.00088501 |
| Parvb    | 0.050300598  | 0.026994742 | 21.41534615 | 20.67020607 |
| Pawr     | 0.137163162  | 0.956442529 | 25.891222   | 26.0580864  |
| Pbrm1    | -0.194644928 | 0.673627098 | 20.51267815 | 20.16001129 |
| Pbxip1   | 0.084103107  | 0.289321366 | 26.32678604 | 26.20263863 |
| Pc       | -0.126300812 | 0.359572264 | 27.90793228 | 28.14967155 |
| Pcbp1    | -0.07122612  | 0.233632671 | 27.63671684 | 27.6189785  |
| Pcbp2    | -0.244129181 | 0.801527056 | 26.08281898 | 25.98947334 |
| Pcca     | 0.030013084  | 0.042345645 | 25.16188622 | 25.00872612 |
| Pccb     | -0.127656937 | 0.324010559 | 25.74082947 | 25.85704613 |
| Pck2     | -0.090819836 | 0.600716251 | 25.11259079 | 25.22652054 |
| Pcmt1    | 0.168166637  | 0.76390447  | 25.8806839  | 26.10585594 |
| Pcyox1   | 0.112610817  | 0.320202484 | 23.6399765  | 24.34495926 |
| Pcyox1l  | 0.155683994  | 0.702989992 | 22.55421829 | 22.89506149 |
| Pcyt1a   | -0.277259827 | 0.17381898  | 22.2110405  | 21.13952446 |
| Pdcd10   | 1.424868107  | 0.399651664 | 23.86258888 | 24.73138046 |
| Pdcd5    | -0.027614594 | 0.073827263 | 24.87323761 | 24.67831039 |
| Pdcd6    | 0.12767458   | 0.597697126 | 26.70872498 | 26.55013084 |
| Pdcd6ip  | 0.02046442   | 0.090242804 | 27.53304291 | 27.60547829 |
| Pddc1    | -0.772409916 | 0.343678697 | 22.41959572 | 19.65229034 |
| Pde3a    | 0.067774296  | 0.186607789 | 25.31496239 | 25.71526146 |
| Pde5a    | -0.328614712 | 0.427511012 | 22.49159813 | 22.66932106 |
| Pdgfrb   | 0.264741898  | 0.607697314 | 24.22228813 | 24.17827988 |
| Pdha1    | -0.075728893 | 0.103685822 | 27.41602898 | 27.65594673 |
| Pdhb     | -0.009065151 | 0.010952331 | 27.96790695 | 28.4814682  |
| Pdhx     | 0.973659515  | 0.459792099 | 22.98837662 | 23.61661148 |
| Pdia3    | 0.020380974  | 0.110793662 | 30.09030533 | 30.07393074 |
| Pdia4    | 0.101449966  | 0.441384014 | 26.88425064 | 26.61343956 |

|        |              |             |             |             |
|--------|--------------|-------------|-------------|-------------|
| Pdia5  | 0.512764454  | 0.550960104 | 22.78426743 | 22.48005486 |
| Pdia6  | -0.068639755 | 0.675389002 | 27.0507164  | 27.15884781 |
| Pdk2   | -1.059381962 | 0.655226795 | 22.09622574 | 22.25110054 |
| Pdk3   | -0.038624763 | 0.057174583 | 24.10221481 | 24.52390671 |
| Pdlim1 | 0.095106602  | 0.512566921 | 29.02011871 | 29.07615089 |
| Pdlim3 | 0.061995983  | 0.391602041 | 28.2444973  | 28.09893608 |
| Pdlim4 | 0.047411919  | 0.176208793 | 26.60724258 | 26.85661888 |
| Pdp1   | 0.088434219  | 0.145004963 | 21.43969345 | 21.77177048 |
| Pds5a  | 0.003192902  | 0.002159115 | 20.85686111 | 21.42224121 |
| Pds5b  | 0.178643703  | 0.649586335 | 24.30445099 | 24.1300621  |
| Pdxdc1 | 0.50185442   | 0.878955322 | 22.12193108 | 22.37063408 |
| Pdxk   | -0.072168827 | 0.305056704 | 25.34468842 | 25.45622826 |
| Pea15  | 0.259934902  | 1.252840948 | 25.48591232 | 25.41118813 |
| Pebp1  | -0.046563148 | 0.191588335 | 29.21479607 | 29.26490211 |
| Pecam1 | -0.117699146 | 0.355990292 | 23.98667717 | 24.44682693 |
| Pepd   | -0.852768898 | 0.636495452 | 19.86849022 | 22.11974716 |
| Pex19  | 0.603070736  | 0.667705892 | 21.17590714 | 21.19868469 |
| Pex5   | -0.024426937 | 0.029680826 | 19.7758255  | 19.81932831 |
| Pf4    | 0.084619045  | 0.139247936 | 25.99946594 | 25.43151093 |
| Pfdn2  | -0.052258015 | 0.092957987 | 23.85528755 | 23.87427139 |
| Pfdn5  | 0.109199524  | 0.307436633 | 23.57865334 | 23.76415443 |
| Pfdn6  | -0.707824707 | 0.368377245 | 22.71751595 | 23.43275261 |
| Pfkl   | -0.016974449 | 0.041150006 | 25.4464798  | 25.89696121 |
| Pfkm   | 0.086946964  | 0.12851241  | 25.66147423 | 26.06383705 |
| Pfkp   | 0.090168953  | 0.441065006 | 27.38549805 | 27.65649223 |
| Pgam1  | 0.120462418  | 1.076400202 | 28.47587585 | 28.65570641 |
| Pgd    | -0.169696808 | 0.614372696 | 26.84445763 | 27.1193161  |
| Pgk1   | -0.059468746 | 0.378632543 | 28.76461601 | 28.86523056 |
| Pgls   | -0.101901531 | 0.442646377 | 27.78923798 | 28.12701416 |
| Pgm1   | -0.125063896 | 0.523988508 | 27.96157265 | 27.98375702 |
| Pgm2   | 0.279842854  | 0.57850508  | 21.71586227 | 21.93642998 |
| Pgm3   | -1.140089989 | 1.084537692 | 20.38819885 | 22.56064606 |
| Pgm5   | 0.054956913  | 0.36664824  | 30.5508709  | 30.77273941 |
| Pgp    | -0.269067287 | 0.983406302 | 24.16307831 | 24.57577133 |
| Pgrmc1 | -0.079629421 | 0.332161412 | 26.20120049 | 26.2647419  |
| Pgrmc2 | 0.112338066  | 0.045683189 | 23.58416939 | 24.22611618 |
| Phb    | 0.164865017  | 0.619537415 | 27.97010422 | 28.062397   |
| Phb2   | -0.042022705 | 0.113574408 | 26.76483727 | 26.77856255 |
| Phgdh  | -0.343536854 | 0.634171261 | 22.12801743 | 21.65368462 |
| Phyhd1 | 0.254216671  | 0.293805684 | 20.9122448  | 20.86817551 |
| Pi15   | 0.332234859  | 0.886756922 | 25.91513252 | 26.31106758 |

|         |              |             |             |             |
|---------|--------------|-------------|-------------|-------------|
| Pi4ka   | 0.026453495  | 0.034448629 | 23.54557228 | 23.79897118 |
| Picalm  | 0.032754898  | 0.088974306 | 27.07826424 | 27.30791092 |
| Pigs    | -0.04866457  | 0.015430968 | 19.35215759 | 22.48214912 |
| Pin1    | -0.170759678 | 0.304401582 | 23.26627922 | 23.43987083 |
| Pip4k2a | -0.008842945 | 0.005112847 | 20.94820786 | 20.34080505 |
| Pir     | 0.011144161  | 0.017579752 | 20.7803669  | 21.35035133 |
| Pitpna  | 0.061398029  | 0.155940133 | 25.08768272 | 25.25266647 |
| Pitpnb  | 0.123758316  | 0.2454509   | 22.40509605 | 23.09261703 |
| Pitrm1  | 0.028150082  | 0.058846701 | 24.58290672 | 24.59360313 |
| Pkm     | -0.005401134 | 0.029391781 | 31.18718719 | 31.33330154 |
| Pkm     | -0.43968153  | 1.277321007 | 27.38401604 | 27.78649902 |
| Pkn1    | -0.315158367 | 0.818953863 | 21.26476288 | 22.01041794 |
| Pla2g4a | 0.185898304  | 0.249568896 | 24.09868622 | 24.23819542 |
| Plcb1   | -0.162642956 | 0.071866693 | 22.63333893 | 21.93252373 |
| Plcb3   | -0.041264057 | 0.083408527 | 23.50470161 | 24.05548286 |
| Plcd1   | -0.074910641 | 0.344742065 | 27.45269775 | 27.56478119 |
| Plec    | 0.250845909  | 1.295287289 | 29.06802177 | 29.08929443 |
| Plg     | -0.015329361 | 0.05310436  | 27.09285164 | 26.7113533  |
| Plin1   | -0.190173626 | 0.241152749 | 28.62613487 | 28.58437729 |
| Plin3   | 0.024189949  | 0.068205745 | 26.1680603  | 26.45838928 |
| Plin4   | -0.009443283 | 0.124955757 | 28.21868134 | 28.23703766 |
| Plp2    | 0.24102354   | 0.743835956 | 23.8752079  | 24.51953316 |
| Pls3    | -0.023848057 | 0.183711487 | 30.00343323 | 30.15267181 |
| Plscr3  | 0.675777912  | 0.595184108 | 22.42108536 | 22.83246422 |
| Plxdc2  | 0.262118816  | 0.36584407  | 22.72065163 | 22.29698181 |
| Plxnb2  | -0.130447865 | 0.248740471 | 23.73210526 | 23.30257034 |
| Pml     | 0.541294575  | 0.652121256 | 21.5534687  | 21.88788605 |
| Pmpca   | -0.288850784 | 0.613722556 | 24.61037254 | 25.06258202 |
| Pnn     | -0.14851284  | 0.064748682 | 19.72033501 | 22.00247383 |
| Pnp     | -0.247362137 | 1.036467341 | 25.74832153 | 26.03263092 |
| Podn    | 1.376428604  | 0.482730592 | 24.98398399 | 25.27013588 |
| Pofut2  | 0.542508125  | 1.06869469  | 22.3073864  | 23.03326988 |
| Poglut1 | 0.240800381  | 0.814834161 | 22.45274544 | 22.7907238  |
| Polr2h  | -0.325835705 | 0.407158799 | 22.14914131 | 22.46109009 |
| Pon1    | -1.012909412 | 0.785522789 | 22.92357635 | 20.34993553 |
| Pon3    | -0.242507935 | 1.093185036 | 26.35220337 | 26.42913246 |
| Por     | -0.1572299   | 0.698304822 | 26.51453018 | 26.8595829  |
| Postn   | 0.760054588  | 0.298199502 | 24.55537605 | 24.09876633 |
| Ppa1    | 0.206244946  | 0.879948827 | 25.96587181 | 25.66345787 |
| Ppa2    | 0.143684864  | 0.315633656 | 24.81738663 | 25.22236061 |
| Ppia    | 0.038095474  | 0.230938233 | 31.36416245 | 31.35384369 |

|          |              |             |             |             |
|----------|--------------|-------------|-------------|-------------|
| Ppib     | 0.047586441  | 0.192036953 | 27.80814743 | 27.72279739 |
| Ppid     | -0.135253906 | 0.484356065 | 24.4086628  | 24.54780769 |
| Ppl      | -0.122098923 | 0.311969831 | 23.12384224 | 23.50591278 |
| Ppm1b    | 0.227903366  | 0.610713785 | 22.20553207 | 21.62956429 |
| Ppme1    | -0.117491722 | 0.162034822 | 23.26255798 | 23.58657646 |
| Ppp1ca   | -0.065059185 | 0.108169828 | 24.37404823 | 24.29242516 |
| Ppp1cb   | 0.008270264  | 0.044205206 | 28.66840935 | 28.69474792 |
| Ppp1cc   | -0.234242916 | 0.307749767 | 21.55576324 | 21.9770813  |
| Ppp1r12a | 0.058156967  | 0.350426503 | 28.08547592 | 28.25858307 |
| Ppp1r12b | -0.110131741 | 0.315486541 | 24.16859627 | 23.59991455 |
| Ppp1r12c | 0.866800308  | 0.49953699  | 23.30493927 | 23.59889221 |
| Ppp1r14a | -0.147548199 | 0.337778005 | 26.65061569 | 26.61694717 |
| Ppp1r7   | -0.080361843 | 0.469274591 | 25.33493805 | 25.49591637 |
| Ppp2ca   | 0.00229311   | 0.009760332 | 26.10757256 | 26.07432938 |
| Ppp2r1a  | -0.023220539 | 0.134925861 | 28.51239204 | 28.63882446 |
| Ppp2r2a  | -0.02105999  | 0.071001772 | 24.7056694  | 24.86112213 |
| Ppp2r4   | -0.093636513 | 0.857249518 | 25.90209961 | 26.11741447 |
| Ppp2r5a  | 0.962063789  | 0.959295933 | 22.50496674 | 22.91011238 |
| Ppp2r5c  | 0.464705944  | 0.392218227 | 22.86913872 | 23.46961021 |
| Ppp6c    | 0.009315968  | 0.028140331 | 21.98140335 | 22.27750397 |
| Ppp6r3   | -0.162840366 | 0.315675244 | 20.13833618 | 20.73686028 |
| Ppt1     | 0.326597214  | 0.711265032 | 24.84842682 | 24.69715691 |
| Praf2    | -0.061084747 | 0.189521299 | 23.1310997  | 23.5639534  |
| Prdx1    | 0.026266098  | 0.171693305 | 29.43105507 | 29.61519432 |
| Prdx2    | -0.023663998 | 0.063478191 | 28.60084343 | 28.18219948 |
| Prdx3    | 0.167610168  | 0.372601902 | 26.68204117 | 26.59818268 |
| Prdx4    | 0.009584427  | 0.068436228 | 26.74842453 | 26.89377022 |
| Prdx5    | -0.06347084  | 0.7753106   | 28.44994545 | 28.46193504 |
| Prdx6    | -0.122124672 | 1.289626142 | 28.4336834  | 28.58745766 |
| Prelp    | 0.230492592  | 1.047987169 | 31.77956581 | 31.92121124 |
| Prep     | -0.00668478  | 0.010043103 | 23.56604576 | 23.6654644  |
| Prkaa1   | 0.174044609  | 0.556634225 | 24.06332207 | 24.00264549 |
| Prkaca   | 0.000892162  | 0.001475142 | 24.4954586  | 24.45129967 |
| Prkag1   | -0.215206623 | 0.933177356 | 24.54951286 | 24.72020149 |
| Prkar1a  | 0.138710499  | 0.433275554 | 25.37845421 | 25.46329308 |
| Prkar2a  | 0.084947109  | 0.206756789 | 23.91679573 | 23.93508148 |
| Prkar2b  | 0.423299789  | 0.552793189 | 24.68901825 | 24.5903511  |
| Prkca    | 0.282485485  | 0.599085823 | 21.98638153 | 22.73721123 |
| Prkcd    | 0.108380795  | 0.034283074 | 24.08699417 | 20.25527573 |
| Prkcdbp  | 0.112717628  | 0.718589734 | 28.86085701 | 28.94002533 |
| Prkcsh   | 1.070489883  | 0.474152396 | 24.33333588 | 24.26119423 |

|         |              |             |             |             |
|---------|--------------|-------------|-------------|-------------|
| Prkg1   | 0.167239189  | 1.128412667 | 25.54347801 | 25.7091465  |
| Prkra   | 0.086604595  | 0.040478507 | 21.67719269 | 20.0256691  |
| Proc    | 0.009448528  | 0.00615019  | 21.38911057 | 21.15715218 |
| Procr   | -0.223341942 | 0.719622699 | 23.41338348 | 23.33019257 |
| Prosc   | -0.029397488 | 0.069291165 | 24.48240852 | 24.6724968  |
| Prpf19  | 0.141516685  | 0.191127752 | 23.72463226 | 24.17835617 |
| Prph    | 0.997899055  | 0.339428452 | 24.85775757 | 24.15946388 |
| Prps1   | -0.281809807 | 0.493822576 | 23.71376801 | 24.77695847 |
| Prpsap1 | 3.67E-05     | 4.32E-05    | 23.52288818 | 23.99714088 |
| Psap    | -0.190981865 | 0.769020084 | 26.70279312 | 26.26468849 |
| Psm1    | -0.012994289 | 0.03979894  | 26.84385872 | 26.97760201 |
| Psm2    | -0.065008163 | 0.375547901 | 26.27426529 | 26.38460922 |
| Psm3    | 0.178674698  | 0.200100252 | 25.27557945 | 25.35625648 |
| Psm5    | 0.039572239  | 0.152140094 | 26.31321526 | 26.1018734  |
| Psm6    | -0.150496006 | 0.723412186 | 26.06070709 | 25.97097015 |
| Psm7    | 0.079950809  | 0.221442024 | 26.18729591 | 26.17871666 |
| Psmb1   | -0.202271461 | 0.801948114 | 26.89942932 | 27.14802361 |
| Psmb2   | -0.087762356 | 0.256774776 | 26.15986824 | 26.33834267 |
| Psmb3   | -0.061714172 | 0.124014634 | 24.89240456 | 25.0507164  |
| Psmb4   | -0.104557991 | 0.268279197 | 23.79887199 | 24.23381424 |
| Psmb5   | -0.661294937 | 0.33143239  | 23.21918869 | 20.11299896 |
| Psmb6   | 0.045309544  | 0.089865044 | 24.44436455 | 24.76612854 |
| Psmb7   | 0.087243557  | 0.200691604 | 23.74868011 | 24.16584015 |
| Psmc2   | 0.133191109  | 0.518957334 | 25.29487991 | 25.51629066 |
| Psmc3   | 0.040229321  | 0.107337079 | 26.1246891  | 26.15303993 |
| Psmc5   | -0.213349819 | 0.768465922 | 24.94360161 | 25.04597664 |
| Psmc6   | 0.053749561  | 0.141103554 | 25.80279541 | 26.04980278 |
| Psmd1   | -0.21703434  | 0.51047817  | 25.60209656 | 26.19302368 |
| Psmd11  | -0.214276791 | 0.796298924 | 25.96441841 | 26.49867249 |
| Psmd12  | 0.272715569  | 0.860389624 | 24.91524696 | 25.25133133 |
| Psmd13  | -0.710547447 | 1.21119882  | 23.48234558 | 24.36573029 |
| Psmd14  | 0.233007431  | 0.57920488  | 25.51668167 | 25.72265244 |
| Psmd3   | -0.08641386  | 0.314293639 | 24.00966644 | 24.19257355 |
| Psmd4   | -0.117525101 | 0.136206868 | 23.28841591 | 23.61503983 |
| Psmd5   | -0.10474062  | 0.264568503 | 25.09260941 | 25.14623833 |
| Psmd6   | 0.121938705  | 0.252347372 | 23.48037529 | 23.39165497 |
| Psmd7   | -0.345146656 | 1.016226709 | 25.59767151 | 25.84625244 |
| Psmd8   | -0.224086285 | 0.250369983 | 23.90967178 | 24.08804703 |
| Psmd9   | -0.195538521 | 0.606735351 | 23.87041855 | 23.68784523 |
| Psm1    | -0.043861389 | 0.213130407 | 27.3358593  | 27.48761559 |
| Psmg1   | 0.278205395  | 0.320819272 | 21.32734299 | 21.42798042 |

|        |              |             |             |             |
|--------|--------------|-------------|-------------|-------------|
| Ptbp1  | -0.097963333 | 0.333423595 | 27.88127899 | 28.1234169  |
| Ptbp2  | -0.562803745 | 0.255065406 | 19.97107315 | 22.16103363 |
| Ptcd3  | -0.390862942 | 0.177022866 | 19.76180077 | 22.58694267 |
| Pter   | 0.691034317  | 0.526756714 | 22.69104385 | 22.99477768 |
| Ptges2 | 1.01339674   | 0.586001661 | 25.1378994  | 24.16798401 |
| Ptges3 | -0.083045006 | 0.268692233 | 25.86251831 | 26.05856133 |
| Ptgfrn | -0.34069252  | 0.821590116 | 21.70184708 | 21.74554443 |
| Ptgis  | 0.046309948  | 0.145154932 | 30.10287094 | 30.35310745 |
| Ptgr1  | 0.15866518   | 0.517787294 | 23.30298805 | 23.55367851 |
| Ptgr2  | 0.571092129  | 0.509881653 | 23.94252777 | 23.85566902 |
| Ptgs1  | -0.081809521 | 0.274076646 | 25.55888367 | 25.4564476  |
| Ptms   | -0.042605877 | 0.058787363 | 24.36138535 | 23.40600395 |
| Ptp4a2 | -0.179782391 | 0.519892988 | 22.87438393 | 23.14237785 |
| Ptpn11 | -0.17539978  | 0.39492008  | 24.21326637 | 24.11195564 |
| Ptpn23 | 0.255795479  | 0.220636649 | 21.62760735 | 21.90142822 |
| Ptprc  | -1.186885357 | 1.101896401 | 20.21652222 | 19.74691772 |
| Ptrh2  | -0.372835159 | 0.449158172 | 23.72296524 | 23.78496552 |
| Puf60  | 1.028447151  | 0.667779525 | 22.79920769 | 23.21654129 |
| Pura   | 0.208666325  | 1.286874888 | 25.21419334 | 25.30838013 |
| Pxdn   | -0.142689228 | 0.364810886 | 23.24026489 | 22.92219734 |
| Pxn    | 0.011556625  | 0.020993923 | 25.19940376 | 25.66470528 |
| Pygb   | -0.043135643 | 0.191251948 | 28.14593697 | 28.35384369 |
| Pygl   | 0.247104645  | 0.605728949 | 24.68228149 | 24.91529274 |
| Pygm   | -0.390717506 | 0.440863509 | 28.2417717  | 28.43507576 |
| Qars1  | 0.091554165  | 0.237898588 | 25.96452904 | 26.43934822 |
| Qdpr   | -0.025873661 | 0.123993272 | 26.07177544 | 26.15003967 |
| Qil1   | 0.128818035  | 0.332643888 | 24.64696693 | 24.81572723 |
| Qki    | 0.165293217  | 0.223213532 | 21.77916527 | 22.36671638 |
| Rab10  | -0.028997421 | 0.103260226 | 25.77723503 | 25.62697792 |
| Rab11b | 0.119086266  | 0.290200734 | 25.87398911 | 25.82975197 |
| Rab12  | 0.464749813  | 0.312362223 | 21.12949753 | 21.93008995 |
| Rab14  | 0.098796844  | 0.336251792 | 26.18201828 | 26.48509789 |
| Rab18  | 0.303142548  | 1.027833395 | 23.90738297 | 23.94163132 |
| Rab1A  | 0.148743153  | 0.741944411 | 26.65102577 | 26.65253067 |
| Rab1b  | 0.043751717  | 0.149719989 | 24.23381424 | 24.52360725 |
| Rab21  | -0.17781353  | 0.595544983 | 25.25053596 | 24.93701363 |
| Rab27b | -0.171857834 | 0.244615561 | 21.22081375 | 21.24881554 |
| Rab2a  | 0.190159321  | 0.305279944 | 24.76405334 | 24.28679657 |
| Rab34  | -0.262886047 | 0.840985287 | 22.46988297 | 22.75156403 |
| Rab35  | -0.067196846 | 0.079835485 | 24.37185669 | 24.46213913 |
| Rab5a  | -0.02308321  | 0.009001663 | 24.22618866 | 23.42700768 |

|         |              |             |             |             |
|---------|--------------|-------------|-------------|-------------|
| Rab5b   | 0.02129221   | 0.126928035 | 26.43790436 | 26.34177399 |
| Rab5c   | 0.107824802  | 0.733360149 | 25.21193123 | 25.19121742 |
| Rab6b   | 0.036092758  | 0.088893772 | 24.48572731 | 24.39649773 |
| Rab7a   | -0.029636383 | 0.102472696 | 26.12180901 | 26.21821022 |
| Rab8a   | -0.833353519 | 0.60236577  | 23.48222351 | 23.24971199 |
| Rab8b   | 0.653046131  | 0.795520017 | 22.27829933 | 22.38492775 |
| Rac1    | -0.019871712 | 0.169786874 | 28.35144424 | 28.46964073 |
| Rad23b  | 0.182869434  | 0.449299221 | 24.625      | 25.09188461 |
| Rala    | 0.191687584  | 0.390917504 | 24.34340096 | 25.17394257 |
| Raly    | 0.423199177  | 0.191146207 | 22.89461708 | 22.82394028 |
| Ranbp1  | 0.233981133  | 0.787834765 | 25.49115181 | 25.67597198 |
| Ranbp2  | -0.36177969  | 0.771421139 | 22.90479469 | 23.30980301 |
| Rangap1 | -0.607573509 | 0.482139835 | 20.75319672 | 19.41313553 |
| Rap1a   | 0.12289381   | 0.383358379 | 25.45051193 | 25.63621902 |
| Rap1b   | -0.030347347 | 0.198788847 | 28.4499855  | 28.21784973 |
| Rap2c   | 0.288210392  | 0.390711741 | 19.8657074  | 20.90448189 |
| Rarres2 | 0.080789089  | 0.113994687 | 23.83759308 | 23.9273243  |
| Rars    | -0.09769392  | 0.524586001 | 26.36862946 | 26.68872452 |
| Raver1  | 0.017243862  | 0.011399802 | 20.46380424 | 22.12189865 |
| Rbbp4   | -0.191856384 | 1.064342386 | 24.52784729 | 24.56749725 |
| Rbbp7   | 1.072342396  | 0.512911141 | 23.10375214 | 22.87766266 |
| Rbbp9   | 0.115822792  | 0.557622185 | 27.30869293 | 27.64223671 |
| Rbm14   | 0.621326923  | 0.866445718 | 22.068964   | 21.70303154 |
| Rbm19   | -0.607652664 | 0.383610609 | 21.19872475 | 23.90591431 |
| Rbm25   | -0.757311344 | 0.655565427 | 23.48971367 | 23.92623901 |
| Rbm3    | -0.0105443   | 0.019402603 | 25.72640038 | 26.18188667 |
| Rbm39   | 0.204586506  | 0.237704713 | 23.52073288 | 23.05410957 |
| Rbmxl1  | 0.06872654   | 0.166294472 | 22.90831757 | 23.29333687 |
| Rbp1    | -0.024802685 | 0.165510278 | 28.0102005  | 28.0775013  |
| Rbp4    | -0.070727348 | 0.180628933 | 23.22144699 | 23.29221344 |
| Rbpms   | 0.065032482  | 0.18008058  | 26.18194199 | 26.45011902 |
| Rbpms2  | 1.197909832  | 0.657413357 | 21.01601982 | 22.91367722 |
| Rcc1    | -0.979747295 | 1.094149256 | 20.54747009 | 22.03264618 |
| Rcn2    | 0.2332654    | 0.78945757  | 22.59176636 | 22.80487061 |
| Rcn3    | 0.254718781  | 0.577777954 | 25.28460884 | 26.07940483 |
| Rdh11   | -0.901132584 | 0.389371292 | 20.70147705 | 23.11391068 |
| Rdh14   | -0.198983669 | 0.359178884 | 21.64204979 | 21.71941948 |
| Rdx     | -0.108765602 | 0.260364201 | 23.43185997 | 23.53931236 |
| Reep5   | 0.064603329  | 0.111955184 | 24.44588089 | 24.64212799 |
| Rexo2   | -0.058875084 | 0.079470326 | 22.61587143 | 21.53445244 |
| Rgs18   | 0.579203129  | 0.49687878  | 23.97254944 | 24.49381065 |



|        |              |             |             |             |
|--------|--------------|-------------|-------------|-------------|
| Rhoa   | -0.005956173 | 0.017276488 | 28.36076546 | 28.39619637 |
| Rhob   | -0.303122044 | 0.506840942 | 23.09040642 | 22.87732697 |
| Rhoc   | 0.022580624  | 0.059439892 | 24.7164917  | 24.54427528 |
| Rhoq   | -0.590908527 | 1.072608866 | 20.03858757 | 20.453825   |
| Rilpl1 | -0.007641792 | 0.007283547 | 22.5460434  | 23.40171432 |
| Rmdn1  | -0.609412193 | 0.318024711 | 23.17881203 | 23.59297562 |
| Rmdn3  | -0.124567032 | 0.156159216 | 23.37703133 | 23.77595329 |
| Rnh1   | 0.040047646  | 0.191903461 | 27.47514153 | 27.70193481 |
| Rnpep  | -0.152561665 | 0.446037952 | 25.07748985 | 25.55584526 |
| Rock1  | 0.142386436  | 0.715472243 | 26.48692513 | 26.51115608 |
| Rock2  | -0.184947014 | 0.715361173 | 23.93192863 | 24.05109024 |
| Rpe    | -0.042203903 | 0.300766588 | 22.61865234 | 22.57408524 |
| Rpl10  | 0.030964375  | 0.064060986 | 26.49614525 | 26.58649063 |
| Rpl10a | 0.122014523  | 0.477962289 | 26.69643974 | 26.47645569 |
| Rpl11  | -0.382401943 | 0.515323721 | 24.36158562 | 24.35709572 |
| Rpl12  | -0.050619602 | 0.121805746 | 26.53023148 | 26.12488747 |
| Rpl13  | 0.042719364  | 0.10826817  | 26.75276947 | 27.14850807 |
| Rpl13a | -0.252561092 | 0.572631287 | 24.6516819  | 24.99511528 |
| Rpl14  | -0.127293587 | 0.479371622 | 26.10765266 | 26.28961372 |
| Rpl15  | 0.033385277  | 0.071058067 | 26.46741867 | 26.54515839 |
| Rpl17  | 0.087658405  | 0.237632328 | 26.91661263 | 26.98706818 |
| Rpl18  | -0.164745331 | 0.239554861 | 24.57207298 | 25.3755722  |
| Rpl18a | 0.336297989  | 0.545359418 | 24.03573799 | 24.33244705 |
| Rpl19  | -0.052975178 | 0.074465862 | 24.17561913 | 23.68773842 |
| Rpl21  | -0.212451935 | 0.48485701  | 24.70160484 | 24.91747856 |
| Rpl22  | -0.041488171 | 0.073185355 | 24.94494057 | 24.55713081 |
| Rpl23  | -0.220473289 | 1.039338188 | 26.14734459 | 26.32777977 |
| Rpl23a | -0.119134426 | 0.15241244  | 24.80365944 | 24.89693642 |
| Rpl24  | 0.009761333  | 0.029634136 | 26.70120811 | 26.5903511  |
| Rpl26  | -0.048163414 | 0.13426305  | 24.97513199 | 24.9711895  |
| Rpl27  | -0.059208393 | 0.284900142 | 24.74437523 | 24.70429802 |
| Rpl27a | 0.017274857  | 0.072756873 | 26.22552681 | 26.45057487 |
| Rpl28  | 0.748671055  | 0.438702982 | 24.98294067 | 25.01367569 |
| Rpl3   | -0.177086353 | 1.064908252 | 26.72520447 | 26.74085426 |
| Rpl30  | -0.121501446 | 0.345442917 | 24.41183281 | 24.22699738 |
| Rpl31  | -0.032973289 | 0.06671889  | 26.10529518 | 26.60470009 |
| Rpl32  | -0.027044296 | 0.058040715 | 25.44871902 | 25.67268562 |
| Rpl34  | -0.211116314 | 0.661911831 | 24.46026421 | 24.49771309 |
| Rpl35  | -0.404290676 | 1.048584011 | 23.91469955 | 23.96322823 |
| Rpl35a | 0.470489025  | 0.172662197 | 23.87979507 | 22.57588577 |
| Rpl36  | -0.297890186 | 0.531911345 | 24.68736458 | 24.20672417 |

|        |              |             |             |             |
|--------|--------------|-------------|-------------|-------------|
| Rpl37a | -0.032270908 | 0.108497572 | 23.77926445 | 23.90205383 |
| Rpl38  | 0.010000229  | 0.025923359 | 23.82026291 | 23.84038162 |
| Rpl39  | 0.016385555  | 0.034181879 | 24.65769196 | 25.27625465 |
| Rpl4   | -0.082959652 | 0.495696561 | 28.46668816 | 28.47490883 |
| Rpl5   | 0.008746147  | 0.025520091 | 26.50964737 | 26.61104774 |
| Rpl6   | -0.070726871 | 0.180344396 | 26.40335846 | 26.61245537 |
| Rpl7   | 0.018950462  | 0.085992216 | 26.72351265 | 26.80415154 |
| Rpl7a  | -0.097984791 | 0.411952663 | 26.80193329 | 26.88809013 |
| Rpl8   | 0.06492424   | 0.349349825 | 26.48647881 | 26.3175869  |
| Rpl9   | -0.184434891 | 0.622284869 | 24.93341637 | 24.76915932 |
| Rplp0  | 0.100195408  | 0.585399203 | 27.25268555 | 27.29166985 |
| Rplp1  | 0.050721645  | 0.207237301 | 27.94737434 | 28.12336731 |
| Rplp2  | -0.011410713 | 0.050661133 | 27.24626541 | 27.16796494 |
| Rpn1   | 0.076024532  | 0.31814663  | 27.60780716 | 27.70971107 |
| Rpn2   | 0.092065334  | 0.354127602 | 27.61210442 | 27.73195076 |
| Rps10  | -0.296375751 | 1.251403726 | 25.63356018 | 25.52513123 |
| Rps11  | 0.022392273  | 0.044041904 | 25.30643463 | 25.0716114  |
| Rps12  | -0.04950428  | 0.226320448 | 25.61571312 | 25.80678368 |
| Rps13  | -0.037015438 | 0.090745575 | 27.32018852 | 27.5587368  |
| Rps14  | -0.098327637 | 0.18560217  | 24.7399025  | 24.71633339 |
| Rps15  | -0.318683624 | 0.75916902  | 25.69935608 | 26.20487976 |
| Rps15a | 0.070083618  | 0.292434122 | 26.14012527 | 26.14604378 |
| Rps16  | 0.013156891  | 0.011825947 | 22.61124039 | 22.94519234 |
| Rps17  | -0.059662342 | 0.162478466 | 26.23684692 | 26.28665543 |
| Rps18  | -0.022591591 | 0.066051014 | 26.88541603 | 26.88890266 |
| Rps19  | -0.207912922 | 0.543149543 | 26.48763084 | 26.79538345 |
| Rps2   | -0.106030464 | 0.511800111 | 26.38633728 | 26.0730629  |
| Rps20  | -0.299014568 | 0.965752764 | 24.84570313 | 24.8554306  |
| Rps21  | 1.091411114  | 0.490424982 | 23.39204979 | 23.22934723 |
| Rps23  | 0.121173859  | 0.338425529 | 24.58577538 | 24.29691124 |
| Rps24  | 0.207537651  | 0.793516349 | 25.03657532 | 25.03216743 |
| Rps25  | -0.049501896 | 0.109778555 | 24.93364143 | 25.40927887 |
| Rps26  | -0.165701866 | 0.48574434  | 25.00088501 | 24.81044006 |
| Rps27a | -0.187564373 | 0.402282897 | 28.22807121 | 27.6288147  |
| Rps27l | 0.006402016  | 0.006408548 | 27.14462471 | 26.15342712 |
| Rps28  | -0.166125298 | 0.140133289 | 23.92741394 | 23.13693047 |
| Rps29  | 0.712216854  | 0.369990962 | 24.14546013 | 24.26406097 |
| Rps3   | 0.020480633  | 0.07002761  | 26.29217911 | 26.25441551 |
| Rps3a  | -0.037218571 | 0.092047459 | 27.26364899 | 27.47429085 |
| Rps4x  | -0.027787209 | 0.080839291 | 27.23278999 | 27.36352539 |
| Rps5   | 0.130575657  | 0.660641733 | 26.10671425 | 26.30499077 |

|         |              |             |             |             |
|---------|--------------|-------------|-------------|-------------|
| Rps6    | -0.461790085 | 0.088614934 | 24.99079323 | 26.12151146 |
| Rps6ka3 | 0.182404041  | 0.653546071 | 21.97819901 | 22.02766228 |
| Rps7    | -0.143507004 | 1.064734624 | 26.12888336 | 26.24695396 |
| Rps8    | -0.027210712 | 0.126898222 | 27.16739082 | 26.98261452 |
| Rps9    | 0.023240089  | 0.079231577 | 26.77919006 | 26.91581535 |
| Rpsa    | 0.033908844  | 0.224319308 | 28.15802956 | 28.1834774  |
| Rptor   | -0.505429745 | 0.655883145 | 20.31694412 | 20.58627892 |
| Rrad    | -0.918512344 | 0.471891445 | 21.31447029 | 19.93259048 |
| Rras    | -0.010815144 | 0.043767293 | 27.65649223 | 27.65574074 |
| Rrbp1   | 0.20619154   | 0.924582161 | 27.04531097 | 27.14170456 |
| Rsu1    | 0.009796143  | 0.041234181 | 29.8022728  | 29.98304939 |
| RtcA    | 0.527514458  | 0.322176324 | 22.48150826 | 22.45274544 |
| Rtcb    | 0.110713482  | 0.424507165 | 25.13120079 | 25.48855019 |
| Rtn1    | 0.25515604   | 0.422207901 | 23.57911301 | 22.88580132 |
| Rtn2    | -0.745333195 | 0.457683124 | 20.29218292 | 22.36956787 |
| Rtn3    | 0.168363094  | 0.37142062  | 25.72811508 | 25.58247757 |
| Rtn4    | 0.101045609  | 0.039828135 | 20.06549835 | 22.97503471 |
| Rtn4    | 0.032740116  | 0.116814042 | 26.90196228 | 26.91706848 |
| RTRAF   | -0.016629219 | 0.081102776 | 24.91159439 | 25.10421562 |
| Rufy1   | 0.763233662  | 0.40384226  | 21.46550369 | 22.70311546 |
| Ruvbl1  | -0.040445328 | 0.101717132 | 24.24742508 | 24.32505417 |
| Ryr1    | 0.803823471  | 0.190461756 | 24.7988224  | 23.74847603 |
| S100a1  | -0.532903671 | 0.268898978 | 22.2112484  | 21.91754341 |
| S100a11 | 0.154359818  | 0.656521033 | 29.41846466 | 29.28550911 |
| S100a13 | -0.554104805 | 0.364508749 | 23.69667816 | 22.5602951  |
| S100a4  | 0.053864002  | 0.118727983 | 31.98063469 | 31.89785767 |
| S100a5  | -1.672556877 | 0.772749596 | 24.45331001 | 20.80788422 |
| S100a6  | -0.419755459 | 0.514914356 | 26.45871735 | 26.69285393 |
| Saal1   | -0.719312668 | 0.872078783 | 21.8839016  | 20.27192116 |
| Sacm1l  | -0.14926815  | 0.590332043 | 23.76809883 | 23.88966942 |
| Sae1    | -0.194126129 | 0.423249412 | 24.72254944 | 25.11060143 |
| Safb2   | -1.570515633 | 0.762851478 | 23.83740044 | 20.60450554 |
| Samm50  | 0.006547451  | 0.01423719  | 25.15263367 | 25.03115845 |
| Sar1a   | -0.173773289 | 0.387851726 | 24.87717628 | 25.11886215 |
| Sar1b   | -0.398108959 | 0.215936417 | 23.15924835 | 20.20671463 |
| Sars    | 0.07885313   | 0.409786574 | 25.23220444 | 25.31900024 |
| Scamp1  | -0.148257732 | 0.053226475 | 22.00333214 | 22.707798   |
| Scara5  | 0.120751381  | 0.338610021 | 23.8579483  | 23.96066856 |
| Scarb2  | 0.31441164   | 0.902580582 | 23.82182121 | 23.80262375 |
| Sccpdh  | 0.152388573  | 0.147038295 | 23.07497787 | 23.15696716 |
| Sdfd1   | -0.102920532 | 0.307173729 | 24.76668358 | 24.57247925 |

|           |              |             |             |             |
|-----------|--------------|-------------|-------------|-------------|
| Scoc      | -0.124166965 | 0.242726981 | 22.14687347 | 22.70583916 |
| Scp2      | -0.019952774 | 0.033283562 | 24.87215805 | 24.69789886 |
| Scpep1    | -0.064442635 | 0.176137787 | 22.71496201 | 22.73886108 |
| Scrn1     | -0.013203621 | 0.046615331 | 23.76536942 | 23.89087486 |
| Scrn2     | 0.273170471  | 0.180785444 | 22.46687508 | 22.96011925 |
| Scube3    | -0.386241913 | 1.093562034 | 24.84622955 | 25.14456558 |
| Sdha      | 0.187491417  | 0.258709844 | 28.21484184 | 28.60254288 |
| Sdhb      | 0.279432774  | 0.438561221 | 26.64058304 | 26.70964622 |
| Sdhc      | -0.092556    | 0.110942766 | 25.00148582 | 24.94944572 |
| Sdhd      | 0.144310951  | 0.255930444 | 23.38508606 | 24.10948563 |
| Sec11a    | 0.045603275  | 0.07489683  | 22.99534798 | 22.93739891 |
| Sec13     | -0.164041996 | 0.317464524 | 24.34129906 | 24.34448624 |
| Sec22b    | -0.059791565 | 0.164386387 | 25.04180717 | 25.27568626 |
| Sec23a    | 0.118249416  | 0.575412086 | 26.45013428 | 26.4731617  |
| Sec23b    | -0.890009403 | 0.460427719 | 21.4283886  | 21.91506386 |
| Sec23ip   | 0.697387218  | 0.341727689 | 23.29586029 | 23.54933739 |
| Sec31a    | 0.10093832   | 0.517017815 | 27.09224701 | 27.35925865 |
| Sec31b    | -0.088737011 | 0.132581475 | 25.90205383 | 25.67919731 |
| Sec61a1   | 0.596955299  | 0.539865544 | 24.62667084 | 24.9504261  |
| Selenbp1  | -0.213356495 | 1.296646448 | 27.89758301 | 28.21923447 |
| Selm      | 0.42234087   | 0.180721904 | 22.89258003 | 21.13019753 |
| Selo      | -0.084340096 | 0.027463504 | 23.09606552 | 23.39113045 |
| Selt      | 0.394695759  | 0.32330278  | 20.86928368 | 20.60955048 |
| Sephs1    | -0.057322502 | 0.016323016 | 22.62952042 | 22.76534843 |
| Sepp1     | -0.698421001 | 0.580937197 | 22.30254173 | 19.93211555 |
| Septin11  | -1.075703621 | 0.929273493 | 20.85205841 | 21.50121498 |
| Septin5   | 0.096476555  | 0.243158148 | 25.27611351 | 25.47849464 |
| Septin7   | -0.085668087 | 0.2775008   | 27.32740211 | 27.67485428 |
| Septin8   | 0.362842083  | 1.074896901 | 25.52243996 | 25.5182724  |
| Serbp1    | -0.136796474 | 0.366238643 | 23.44252968 | 23.45412636 |
| Serpina1a | 0.245903015  | 0.138114038 | 25.19084167 | 25.10992432 |
| Serpina1b | -0.528722286 | 1.289313205 | 27.73976135 | 27.33108139 |
| Serpina1c | -0.410489559 | 1.04818658  | 30.85556412 | 30.26114082 |
| Serpina1d | -0.018184662 | 0.032083294 | 27.64072227 | 27.39811325 |
| Serpina1e | -0.185549259 | 0.285388723 | 27.55530357 | 26.96708298 |
| Serpina3k | -0.287694454 | 0.410881129 | 28.8944931  | 28.20643616 |
| Serpina3n | -0.05499506  | 0.236389717 | 23.4299469  | 23.53848457 |
| Serpina6  | 0.493467331  | 0.506108762 | 21.82357025 | 21.47654915 |
| Serpinb1a | -0.765209675 | 0.412568766 | 22.78178787 | 22.54366112 |
| Serpinb6  | -0.211849213 | 0.916655681 | 28.14681053 | 28.28594971 |
| Serpinc1  | -0.062935352 | 0.17838998  | 29.45079231 | 29.20650482 |

|          |              |             |             |             |
|----------|--------------|-------------|-------------|-------------|
| Serpind1 | -0.070579529 | 0.227216762 | 25.27376747 | 25.00487518 |
| Serpine2 | -0.074191093 | 0.309103939 | 27.77259827 | 27.69875908 |
| Serpinf1 | 0.168096066  | 0.541254264 | 26.87373161 | 27.00699425 |
| Serpinf2 | -0.828990459 | 0.403316945 | 22.86268425 | 19.16977501 |
| Serping1 | -0.049945831 | 0.149336077 | 24.97714233 | 24.45217896 |
| Set      | 0.030669689  | 0.04204095  | 23.79590416 | 24.49771309 |
| Setd7    | -0.166803837 | 0.128065894 | 20.52189064 | 21.83634186 |
| Sf1      | 0.018974781  | 0.027453248 | 23.92949295 | 24.70930481 |
| Sf3a1    | -1.231553078 | 0.481065444 | 22.25473595 | 18.80006027 |
| Sf3a2    | 0.240467072  | 0.581117134 | 22.55370331 | 22.56064606 |
| Sf3b1    | -0.328889847 | 0.497509297 | 23.25055122 | 24.19940376 |
| Sf3b3    | -0.278897762 | 0.524004757 | 23.1304245  | 23.14907837 |
| Sf3b4    | -0.134062767 | 0.435867105 | 22.89306259 | 23.06531334 |
| Sfn      | 0.006356239  | 0.007243774 | 25.44272041 | 24.99709702 |
| Sfpq     | 0.033821106  | 0.099715749 | 26.01369667 | 25.94237137 |
| Sfrp1    | -0.142652035 | 0.246124814 | 24.84952545 | 25.30778885 |
| Sfxn1    | -0.240067959 | 0.368294811 | 24.06357002 | 24.66698265 |
| Sfxn3    | 0.051419735  | 0.184446344 | 28.20041466 | 28.35518837 |
| Sgca     | 0.121933937  | 0.170199044 | 24.72489166 | 24.7536869  |
| Sgcb     | 0.042546749  | 0.115310837 | 25.07581902 | 25.3558197  |
| Sgcd     | -0.087021828 | 0.235295773 | 26.0257206  | 25.87820625 |
| Sgce     | 0.069933414  | 0.211224075 | 26.88168716 | 26.80943489 |
| Sgcg     | -0.988099575 | 0.373643817 | 23.5892086  | 23.51219559 |
| Sgpl1    | -0.287356853 | 0.165898694 | 20.37794876 | 21.5831604  |
| Sgta     | -1.807784557 | 0.407501996 | 19.08303833 | 27.13955879 |
| Sh3bgrl  | 0.110185146  | 0.390773893 | 28.01329231 | 27.81799698 |
| Sh3bgrl3 | 0.163613796  | 0.138320618 | 24.73505402 | 24.739748   |
| Sh3d21   | -0.216135979 | 0.67597716  | 29.3224678  | 29.13672638 |
| Sh3gl1   | 1.26820612   | 1.070004099 | 22.89905167 | 22.93572807 |
| Sh3glb1  | -0.244222164 | 0.777028499 | 23.84957314 | 23.74765587 |
| Sh3glb2  | 0.287713528  | 0.670690608 | 24.75113487 | 24.32505417 |
| Sh3pxd2a | -0.763731003 | 0.608921828 | 21.71971893 | 23.38692856 |
| Shmt2    | 0.08945322   | 0.204148649 | 23.48099136 | 23.69381142 |
| Sim2     | 1.018695831  | 0.426912071 | 23.7774601  | 23.69381142 |
| Sirt2    | -0.305059433 | 0.52146273  | 20.76707077 | 21.96895027 |
| Skp1     | -0.167254448 | 0.15178791  | 24.66665649 | 25.04893112 |
| Slc12a6  | 0.065382481  | 0.12436998  | 21.57800865 | 22.41586113 |
| Slc1a5   | -0.173362732 | 0.118026532 | 22.82774353 | 22.49575233 |
| Slc25a1  | 0.022566319  | 0.040406825 | 25.84405136 | 26.16570663 |
| Slc25a10 | -0.074984074 | 0.073300736 | 23.51292038 | 23.56975746 |
| Slc25a11 | -0.083045006 | 0.383784092 | 25.89751434 | 25.80141449 |

|          |              |             |             |             |
|----------|--------------|-------------|-------------|-------------|
| Slc25a12 | -0.081445694 | 0.186954982 | 26.39211464 | 26.72754288 |
| Slc25a20 | -0.897358894 | 0.440843597 | 25.20650101 | 25.66448975 |
| Slc25a24 | -0.0910182   | 0.325830423 | 24.58674812 | 24.9474411  |
| Slc25a3  | -0.036548615 | 0.129867994 | 27.34358788 | 27.41231918 |
| Slc25a4  | 0.093384266  | 0.791438089 | 30.30671692 | 30.50474167 |
| Slc25a42 | 0.002917767  | 0.001775574 | 23.10627937 | 23.50433731 |
| Slc25a5  | 0.064994335  | 0.188579063 | 28.05620766 | 27.93089294 |
| Slc25a51 | 0.534737587  | 0.413097112 | 22.88115883 | 23.29431915 |
| Slc27a1  | -0.000334263 | 0.000848083 | 21.56448746 | 22.00552559 |
| Slc29a1  | -0.283090115 | 0.444418891 | 20.53801155 | 21.10495186 |
| Slc2a1   | 0.409774303  | 0.24743733  | 22.14014816 | 20.42912674 |
| Slc3a2   | -1.002087593 | 0.738402476 | 23.18458939 | 22.66353416 |
| Slc44a2  | -0.328035355 | 0.921926738 | 24.51020622 | 24.30952454 |
| Slc4a1   | 0.411620617  | 0.891717606 | 29.24424744 | 28.28819656 |
| Slc4a7   | 0.604344368  | 0.669132117 | 23.84737587 | 22.43458557 |
| Slit3    | -0.002596855 | 0.003980901 | 23.74427223 | 24.00889778 |
| Smap     | 0.111719608  | 0.547770271 | 27.94770813 | 28.01030731 |
| Smarca2  | 1.074334145  | 0.526824814 | 23.60048103 | 20.84671783 |
| Smarca5  | 0.036178589  | 0.058808892 | 23.30089569 | 23.94708443 |
| Smarcc2  | 0.189890862  | 0.795548622 | 23.16914749 | 23.6382103  |
| Smc1a    | -0.278752327 | 0.880211709 | 22.58279228 | 22.90420532 |
| Smc3     | 0.157338142  | 0.16172287  | 20.37060738 | 21.44080925 |
| Smdt1    | -0.264459133 | 0.298822582 | 20.85285187 | 21.55041885 |
| Smoc1    | -0.165799141 | 0.574423541 | 26.10940742 | 26.30108833 |
| Smpd4    | 0.243121624  | 0.394615453 | 22.67828941 | 22.07139778 |
| Smpdl3a  | 0.027938843  | 0.018088715 | 21.58623314 | 21.67266846 |
| Smpdl3b  | 0.251164436  | 0.626765182 | 21.93786621 | 21.73892403 |
| Smu1     | -0.128509521 | 0.200649031 | 23.10599136 | 23.83691978 |
| Sncg     | 0.254972458  | 0.457346614 | 25.09876633 | 25.25165558 |
| Snd1     | -0.113245964 | 0.353773204 | 26.60851288 | 26.42604828 |
| Snrnp200 | -0.098091602 | 0.259781734 | 24.69407654 | 25.08460426 |
| Snrnp70  | -0.304590702 | 0.587694595 | 24.14071083 | 24.32759094 |
| Snrpa    | 0.712269783  | 0.371697356 | 23.41351318 | 24.11886215 |
| Snrpb2   | -0.028805733 | 0.048171799 | 23.35595322 | 24.10325623 |
| Snrpd1   | -0.152678967 | 0.421754532 | 25.45820045 | 25.8191185  |
| Snrpd3   | -0.130204678 | 0.490957362 | 23.8493824  | 23.86429214 |
| Snrpe    | 0.023798943  | 0.036046228 | 24.51875305 | 25.05208588 |
| Snrpf    | -0.14570713  | 0.331571465 | 23.48271561 | 23.34313011 |
| Snrpg    | -0.905431271 | 0.988350499 | 21.587286   | 23.44897079 |
| Snta1    | -0.154611588 | 0.80412601  | 25.08094978 | 25.22964096 |
| Sntb1    | 0.006205082  | 0.029712018 | 26.6563549  | 26.68364716 |

|         |              |             |             |             |
|---------|--------------|-------------|-------------|-------------|
| Sntb2   | 0.044921875  | 0.347380547 | 26.54791069 | 26.69192314 |
| Snx12   | -0.013353825 | 0.029424973 | 23.39375114 | 23.15875435 |
| Snx17   | -0.163555622 | 0.064193075 | 22.67710686 | 22.79944611 |
| Snx18   | -0.05810976  | 0.185811947 | 26.10063171 | 26.24163628 |
| Snx2    | 0.756165028  | 0.392021536 | 23.04057884 | 23.3249855  |
| Snx3    | 0.16835022   | 0.543524053 | 24.20806503 | 24.44132805 |
| Snx4    | -0.550672054 | 0.47642463  | 21.14532089 | 21.05688858 |
| Snx5    | 0.203516483  | 0.120047578 | 23.16642189 | 23.15860176 |
| Snx6    | 0.067465305  | 0.085275559 | 22.07215118 | 22.56548882 |
| Snx9    | 0.01566124   | 0.093814078 | 24.50893784 | 24.52007294 |
| Sod1    | 0.020870209  | 0.036316101 | 29.08332062 | 28.66979599 |
| Sod2    | -0.112183094 | 0.242958005 | 27.49243546 | 27.46396255 |
| Sod3    | -0.104145527 | 0.546472099 | 30.35100174 | 30.10049057 |
| Sorbs1  | 0.065758705  | 0.208449515 | 27.09928703 | 27.45356178 |
| Sorbs2  | 0.612679958  | 1.289356746 | 27.24653625 | 27.26257515 |
| Sorbs3  | 0.203764915  | 0.503832861 | 25.44789886 | 25.79111671 |
| Sord    | -0.116295338 | 0.351085411 | 23.83296585 | 23.93552971 |
| Sost    | -0.305438042 | 1.209749026 | 27.19657326 | 27.09838486 |
| Spag9   | 0.561740398  | 0.554936288 | 21.18072891 | 22.33472633 |
| Sparcl1 | 0.892180443  | 0.308605314 | 20.67547989 | 22.89844131 |
| Spcs2   | 0.889445305  | 0.530050913 | 23.78196716 | 23.11762619 |
| Spon1   | 0.104704857  | 0.260445587 | 24.7490387  | 24.17539024 |
| Spr     | -0.040131569 | 0.124719853 | 26.84852219 | 27.19966698 |
| Spta1   | 0.332357883  | 0.697566618 | 27.6317997  | 26.66505814 |
| Sptan1  | 0.096543312  | 0.44040803  | 29.99833107 | 29.86553955 |
| Sptb    | 0.379864693  | 0.662950092 | 27.41062164 | 26.29302025 |
| Sptbn1  | 0.130572319  | 0.744165532 | 30.02234268 | 29.92804146 |
| Sri     | -0.137924194 | 0.364880868 | 26.30975151 | 26.32627106 |
| Srm     | 0.096249104  | 0.144823529 | 24.36419487 | 24.03640747 |
| Srp14   | 0.097708702  | 0.076120366 | 22.04773331 | 22.01886177 |
| Srp54   | -0.087777615 | 0.33103389  | 22.61058617 | 22.96909142 |
| Srpx    | 0.335148811  | 1.041420348 | 24.94319916 | 24.96022606 |
| Srrm1   | 0.152528286  | 0.233351828 | 22.78072739 | 23.43389893 |
| Srrt    | 0.023706436  | 0.005827343 | 21.42479897 | 24.02165985 |
| Srsf1   | -0.260943413 | 0.852086018 | 23.29305649 | 23.69168282 |
| Srsf10  | -0.054176331 | 0.170063661 | 23.51328087 | 23.55496788 |
| Srsf2   | -0.1171422   | 0.238181858 | 24.31589508 | 24.29998779 |
| Srsf6   | -0.176950932 | 0.274630139 | 24.12392044 | 23.95633125 |
| Srsf7   | -0.229584217 | 0.749530462 | 23.42624092 | 23.51953316 |
| Ssb     | -0.134290695 | 0.716463659 | 25.62452507 | 25.61371994 |
| Ssbp1   | -0.094903946 | 0.030042819 | 21.3326683  | 23.89022636 |

|         |              |             |             |             |
|---------|--------------|-------------|-------------|-------------|
| Sspn    | -0.230048656 | 0.093087989 | 19.65472603 | 22.0975132  |
| Ssr1    | 0.867743015  | 0.473743591 | 24.38093185 | 24.62148285 |
| Ssr4    | 0.052351475  | 0.142797623 | 23.11224174 | 23.00020409 |
| St13    | -0.087386131 | 0.300750339 | 25.78728485 | 26.22271156 |
| St3gal5 | 0.448764324  | 0.471768508 | 22.49955177 | 22.79865456 |
| Stat3   | -0.09431839  | 0.351548171 | 24.70809364 | 25.09884644 |
| Steap3  | 0.209948063  | 0.3188422   | 24.06890869 | 24.51219559 |
| Stim1   | 0.055395126  | 0.247738572 | 23.3308773  | 23.39270401 |
| Stip1   | 0.000146866  | 0.000456824 | 27.1286869  | 27.10189438 |
| Stk24   | 0.176236153  | 0.762910928 | 25.41180229 | 25.55449867 |
| Stk39   | -0.626968861 | 0.319898877 | 20.69765282 | 22.5544529  |
| Stom    | -0.025576591 | 0.087467607 | 26.53265572 | 26.5109005  |
| Stoml2  | -0.086045265 | 0.295263748 | 24.38502121 | 24.40833855 |
| Ston1   | -0.753548145 | 0.554874933 | 20.04406929 | 19.59588814 |
| Strap   | -0.80606842  | 0.362195537 | 20.91870117 | 22.95374107 |
| Sts     | 0.177853584  | 0.325441604 | 23.02413177 | 23.57669449 |
| Stt3a   | 0.124604225  | 0.180971819 | 22.26241302 | 22.27909279 |
| Stt3b   | 0.281696796  | 1.090539293 | 22.37018013 | 22.85984421 |
| Stx12   | 0.22582674   | 0.961034619 | 24.66090393 | 24.34319878 |
| Stx16   | -0.047251701 | 0.087371924 | 22.9693718  | 22.78907204 |
| Stx7    | 0.983214378  | 0.56270259  | 22.94336891 | 23.01186752 |
| Stxbp3  | 0.065393448  | 0.300708408 | 25.37620163 | 25.71910477 |
| Sucla2  | -0.093882561 | 0.112376309 | 26.89434814 | 27.15005875 |
| Suclg1  | -0.316310883 | 0.432149792 | 27.76938629 | 28.22269249 |
| Suclg2  | -0.006540775 | 0.016483276 | 25.60303116 | 25.43885612 |
| Sugt1   | -0.045405865 | 0.015437096 | 23.13448715 | 23.17689705 |
| Sulf1   | 0.102065563  | 0.035345833 | 22.72442436 | 22.65996742 |
| Sun1    | 0.164820194  | 0.568241131 | 24.16974449 | 24.11481667 |
| Sun2    | -0.032384872 | 0.077777493 | 26.51701164 | 26.67060661 |
| Suox    | -0.360158443 | 0.533408629 | 21.25790787 | 22.45773697 |
| Surf4   | 0.009432793  | 0.020811515 | 23.81567764 | 23.47370338 |
| Susd2   | 0.089206219  | 0.256734536 | 26.05243874 | 26.07889557 |
| Svil    | 0.451628685  | 0.971799584 | 24.51111031 | 24.97180367 |
| Sync    | 1.127851963  | 1.095191788 | 20.78833771 | 21.82578468 |
| Syncrip | 0.136822224  | 0.455240462 | 25.74023628 | 25.85198021 |
| Syne1   | 0.214656353  | 0.429621627 | 24.80597305 | 24.81743622 |
| Syne2   | 0.58447361   | 0.443321655 | 23.19700623 | 23.66622353 |
| Synm    | 0.533454895  | 0.426206074 | 23.04321671 | 22.85079384 |
| Synpo   | 0.175765991  | 1.03150368  | 25.59536934 | 25.76585007 |
| Tagln   | 0.172629356  | 1.144251424 | 33.37075043 | 33.42779922 |
| Tagln3  | 0.320820808  | 0.92621294  | 26.27969551 | 25.72129822 |



|          |              |             |             |             |
|----------|--------------|-------------|-------------|-------------|
| Taldo1   | -0.114872932 | 0.532076823 | 26.51257324 | 26.82796097 |
| Tapbp    | -0.271061897 | 0.323141415 | 24.48726273 | 24.96433067 |
| Tardbp   | 0.100439072  | 0.490455694 | 26.25907707 | 26.06968689 |
| Tars     | 0.064744949  | 0.145769935 | 24.41982651 | 24.55092239 |
| Tbc1d1   | -1.129895687 | 1.147688419 | 19.73096466 | 20.80088806 |
| Tbcd     | 0.258430958  | 0.433709443 | 21.44909668 | 22.05609512 |
| Tcea1    | -0.222082615 | 0.437824324 | 22.3118     | 22.96490288 |
| Tceb1    | -0.196125507 | 0.253882813 | 23.67454529 | 23.89068985 |
| Tceb2    | -0.260139465 | 0.826977346 | 24.79392052 | 25.30344009 |
| Tcn2     | -0.571621418 | 1.184364778 | 20.80937958 | 21.26218414 |
| Tcp1     | -0.165502548 | 1.039755789 | 27.11525345 | 27.22563744 |
| Tes      | 0.19700861   | 0.909810475 | 27.07581902 | 27.30478096 |
| Tf       | -0.122513771 | 0.350215888 | 30.88961411 | 30.42672348 |
| Tgfb1i1  | 0.031270981  | 0.122937312 | 30.48769188 | 30.77548981 |
| Tgfbi    | 0.199584007  | 0.807906878 | 28.86688042 | 29.11078072 |
| Tgm2     | 0.02022028   | 0.163630035 | 30.08372688 | 30.08042717 |
| Th       | -0.354032516 | 0.130215823 | 22.20386124 | 22.15526962 |
| Thbs1    | 0.176159382  | 0.245612728 | 26.86903    | 26.007658   |
| Thumpd1  | -0.219446182 | 0.19653346  | 21.8652916  | 22.71320152 |
| Thy1     | -0.292264938 | 0.418476661 | 25.38142776 | 25.56246948 |
| Timm13   | 0.74641037   | 0.646317705 | 24.23161888 | 25.74365616 |
| Timm44   | -0.366450787 | 0.303103687 | 20.37342072 | 22.51953316 |
| Timm50   | -0.302840233 | 0.784779794 | 21.13081741 | 21.66257858 |
| Timp3    | -0.133297443 | 0.218861267 | 23.24803352 | 23.15517616 |
| Tinagl1  | -0.122456074 | 0.691248779 | 29.79730225 | 29.86039734 |
| Tjp1     | -0.279983044 | 0.450923382 | 23.67206383 | 23.42534447 |
| Tkt      | -0.048878193 | 0.16665468  | 29.93466568 | 30.1450367  |
| Tln1     | 0.082698822  | 0.943934973 | 33.09641266 | 33.1918869  |
| Tln2     | -0.010284424 | 0.017663357 | 24.25053596 | 24.52384567 |
| Tmco1    | -0.165453434 | 0.075911614 | 20.40072632 | 22.49770164 |
| Tmed10   | -0.057714939 | 0.368015874 | 25.62636566 | 25.85982132 |
| Tmed2    | 0.014499664  | 0.019474181 | 24.72192383 | 24.76080894 |
| Tmed9    | -0.78034544  | 0.342439127 | 23.45913887 | 23.46861649 |
| Tmem14c  | 2.229607105  | 0.707689269 | 24.53842545 | 24.27937508 |
| Tmem167a | -0.092648506 | 0.123962476 | 20.91889    | 21.38884735 |
| Tmem43   | 0.124567986  | 0.603581245 | 27.67915726 | 27.83171082 |
| Tmod1    | -0.827119827 | 0.73451689  | 22.399786   | 20.21521759 |
| Tmod3    | 0.246756554  | 0.261854845 | 25.17321777 | 25.49987411 |
| Tmpo     | 0.027092457  | 0.18434603  | 27.37500954 | 27.4247036  |
| Tmpo     | -0.236915112 | 0.892910523 | 23.40769005 | 23.41570663 |
| Tmsb10   | -0.059326172 | 0.063264076 | 22.7549305  | 22.46836662 |

|          |              |             |             |             |
|----------|--------------|-------------|-------------|-------------|
| Tmsb4x   | 0.16977787   | 0.259018083 | 27.53215027 | 26.73789215 |
| Tmtc3    | 0.046685219  | 0.114759803 | 22.41379738 | 22.32909775 |
| Tmx1     | 0.075701714  | 0.09137356  | 24.08610344 | 23.95766068 |
| Tmx2     | -0.270761013 | 0.44894181  | 20.85452843 | 20.72675323 |
| Tmx4     | -0.04861021  | 0.085047493 | 22.07198715 | 22.11511803 |
| Tnc      | 1.656639576  | 0.817946665 | 21.9107132  | 23.00216484 |
| Tnfaip8  | -0.309360504 | 0.345950719 | 20.6457634  | 21.97858429 |
| Tnpo1    | -0.004243374 | 0.01739006  | 24.93192863 | 25.15753746 |
| Tnpo2    | 0.633282661  | 0.48217006  | 22.54295349 | 22.89774132 |
| Tnpo3    | -0.339925289 | 0.547320836 | 23.3334713  | 24.58198929 |
| Tns2     | 0.050353527  | 0.141126015 | 26.92150307 | 27.09908676 |
| Tom1     | 0.361064911  | 1.278554055 | 22.96201134 | 22.44468117 |
| Tom1l2   | -0.16173172  | 0.244904532 | 24.08480644 | 24.34435081 |
| Tomm22   | 0.242465019  | 0.440870822 | 23.17788506 | 23.03818512 |
| Tomm34   | -0.853889942 | 0.518578478 | 23.1900425  | 20.33805847 |
| Tomm70a  | -0.040040493 | 0.052119545 | 23.31146622 | 24.24401665 |
| Top2a    | 0.102632523  | 0.161844173 | 27.15663147 | 26.3432827  |
| Top2b    | -0.236506939 | 0.360885171 | 23.57761574 | 24.31492805 |
| Tor1aip1 | 0.465477943  | 0.172477878 | 23.09566307 | 23.1896801  |
| Tor1aip2 | -0.542536736 | 0.303976179 | 20.412714   | 20.23093796 |
| Tor1b    | 0.25190115   | 0.463260753 | 23.19819069 | 23.38389969 |
| Tor3a    | -0.236032963 | 0.391202238 | 21.86525536 | 22.08271217 |
| Tpd52    | -1.379724503 | 1.221049424 | 21.2291317  | 20.95065308 |
| Tpd52l2  | -0.1229496   | 0.282825787 | 25.4373951  | 25.28704262 |
| Tpi1     | -0.062595367 | 0.515939594 | 29.48958778 | 29.51337242 |
| Tpm1     | 0.157471657  | 0.452518302 | 29.81053925 | 29.67801476 |
| Tpm3     | 0.030799866  | 0.063303803 | 28.98576546 | 28.54144859 |
| Tpm4     | 0.114137173  | 0.409819449 | 26.75276947 | 26.44029808 |
| Tpp1     | -0.167324543 | 0.448040732 | 24.94574547 | 25.02863121 |
| Tppp     | 0.336646557  | 0.800124346 | 21.16594696 | 21.24469757 |
| Tppp3    | 0.126515388  | 0.45297491  | 28.13985252 | 27.95038033 |
| Tpr      | -0.293371677 | 0.311573257 | 22.6399765  | 22.78210831 |
| Tprkb    | -0.310792446 | 0.233893777 | 20.4673233  | 21.4998436  |
| Tpt1     | -0.053723335 | 0.08242434  | 26.81102943 | 26.47903442 |
| Trap1    | 0.167760372  | 0.091936796 | 22.7874794  | 23.12363625 |
| Trappc2  | 0.101322174  | 0.100428829 | 20.75955009 | 20.71313858 |
| Trappc3  | 0.087371826  | 0.172746316 | 22.81060791 | 23.11516571 |
| Trappc6b | -0.116393566 | 0.324477569 | 23.33156013 | 23.58646202 |
| Trim23   | -1.304745674 | 1.232205097 | 20.85741615 | 19.53733444 |
| Trim28   | -0.098539352 | 0.339026086 | 25.22574806 | 25.45979691 |
| Trim47   | 0.088251114  | 0.278236281 | 24.59423065 | 24.75831985 |

|         |              |             |             |             |
|---------|--------------|-------------|-------------|-------------|
| Trio    | 0.515956402  | 0.772759786 | 22.49353027 | 22.47154617 |
| Trip10  | 0.065036297  | 0.212181591 | 27.36068153 | 27.32765961 |
| Trmt112 | -0.169864655 | 0.152198387 | 22.17733765 | 23.13323402 |
| Trnt1   | -0.399352074 | 0.403287156 | 22.41879845 | 22.51515961 |
| Tsn     | 0.708450794  | 0.356097066 | 24.19302368 | 23.55940819 |
| Tsnax   | -0.218497276 | 0.42182392  | 24.36165237 | 24.31381989 |
| Tspan4  | 0.266926765  | 0.595729435 | 23.83759308 | 23.88446045 |
| Tspan9  | 1.002959728  | 1.08981302  | 22.79643822 | 23.30410194 |
| Tspo    | 0.304261684  | 0.439975325 | 25.35588646 | 26.28646088 |
| Tst     | 0.176353931  | 0.553993586 | 24.45726204 | 24.26026154 |
| Ttc28   | 0.333123684  | 0.417540682 | 21.33957291 | 21.50857353 |
| Ttc38   | -0.066304684 | 0.130942971 | 23.71628189 | 24.26406097 |
| Ttll12  | 0.488135815  | 0.25246326  | 22.42436981 | 22.66758919 |
| Ttn     | -1.233510494 | 0.25173538  | 27.59747314 | 22.12009621 |
| Tuba1a  | -0.401970863 | 0.428558481 | 25.2026577  | 25.85364723 |
| Tuba1b  | 0.064917088  | 0.332705904 | 31.65689278 | 31.72602463 |
| Tuba1c  | 0.260387421  | 0.912886618 | 27.66749763 | 27.7980442  |
| Tuba4a  | 0.167237759  | 0.039042466 | 24.12360573 | 23.58221817 |
| Tubb2b  | 0.309022903  | 0.783508706 | 27.47026253 | 27.52723694 |
| Tubb3   | 0.39286375   | 0.335575916 | 25.91307831 | 26.13586617 |
| Tubb4a  | 0.392973423  | 0.597594299 | 24.0679245  | 23.68228149 |
| Tubb4b  | 0.143409729  | 0.842682265 | 32.15161514 | 32.22937393 |
| Tubb5   | 0.201173782  | 0.977579129 | 29.1826725  | 28.84508705 |
| Tufm    | -0.014064312 | 0.034556248 | 26.62631035 | 26.75187492 |
| Twf1    | -0.153306961 | 0.242188321 | 23.7869606  | 24.13265419 |
| Twf2    | -0.073271275 | 0.161922897 | 23.07336044 | 23.04873085 |
| Txn     | 0.111138344  | 0.416180201 | 27.95338058 | 28.00988007 |
| Txn2    | 0.510151386  | 0.961244698 | 23.55835724 | 23.45901489 |
| Txndc5  | 0.098078251  | 0.305425097 | 26.29036903 | 26.48879433 |
| Txn11   | -0.051270485 | 0.155111855 | 24.43904686 | 24.71560097 |
| Txnrd1  | -0.003939629 | 0.010648509 | 24.76395226 | 25.14941978 |
| U2af1   | 0.180516243  | 0.325851043 | 23.51159286 | 23.72296524 |
| U2af2   | -0.244616508 | 0.682074994 | 24.55543518 | 24.97478104 |
| Uap1l1  | -0.117137909 | 0.605827937 | 24.07936287 | 24.42406273 |
| Uba1    | -0.045884132 | 0.306281973 | 29.47330475 | 29.56844711 |
| Uba2    | 0.073765755  | 0.234962498 | 23.4966774  | 23.47258759 |
| Uba3    | 0.164494038  | 0.186970917 | 22.40810585 | 22.16760254 |
| Uba5    | 0.439878464  | 0.093414484 | 24.57813454 | 24.50911903 |
| Udap2l  | 0.85119009   | 0.885596963 | 22.1378994  | 21.98780441 |
| Ube2d2  | -0.165067673 | 0.397453651 | 24.74570847 | 25.40077019 |
| Ube2i   | -0.098370552 | 0.301970878 | 22.73811913 | 23.08422279 |

|         |              |             |             |             |
|---------|--------------|-------------|-------------|-------------|
| Ube2k   | -0.798068523 | 0.427742756 | 23.10448837 | 23.23965263 |
| Ube2l3  | 0.122257233  | 0.404774657 | 26.71292877 | 27.2473526  |
| Ube2n   | 0.027359962  | 0.189412344 | 27.25304604 | 27.36009598 |
| Ube2v2  | 0.050595284  | 0.104442317 | 24.8894825  | 25.18808937 |
| Ube3c   | -0.399784565 | 0.980758373 | 28.98011017 | 28.89680481 |
| Ube4a   | -0.787062645 | 0.847319396 | 20.5993042  | 21.52008629 |
| Ube4b   | -0.575336456 | 0.665216144 | 21.9642334  | 20.82873154 |
| Ubl5    | -0.066843987 | 0.06956069  | 20.16888809 | 20.26956558 |
| Ubqln1  | 0.072437763  | 0.127025215 | 23.65031433 | 23.75195122 |
| Ubqln2  | -0.459320545 | 0.253213481 | 19.77482796 | 22.39490318 |
| Ubr4    | 0.195713043  | 0.552062513 | 23.57773209 | 24.02757645 |
| Ubxn1   | 0.011302471  | 0.009785728 | 23.43249893 | 23.43173409 |
| Ubxn6   | 1.231986523  | 0.567539829 | 21.28209877 | 23.11187553 |
| Uchl1   | 0.284908295  | 0.776143507 | 27.3411293  | 27.41296387 |
| Uchl3   | -1.372788429 | 0.522328671 | 20.23054123 | 21.16144371 |
| Ucp1    | -0.360180378 | 0.187505251 | 27.83424568 | 28.74765587 |
| Ufc1    | 0.080644131  | 0.203098334 | 24.8137722  | 25.37878418 |
| Ufd1l   | -0.150527    | 0.313169885 | 24.05722046 | 24.65398026 |
| Ufm1    | 0.030353546  | 0.115950224 | 25.01239586 | 25.0998497  |
| Uggt1   | -0.192722797 | 0.432190257 | 26.68819237 | 26.69604301 |
| Ugp2    | -0.187726974 | 0.861278847 | 25.2053833  | 25.44843483 |
| Ugt1a9  | 0.315675259  | 0.577113471 | 21.21282196 | 21.53578186 |
| Umps    | -0.226836205 | 0.436170162 | 20.27491951 | 20.3565979  |
| Unc45a  | -0.002278328 | 0.006839437 | 26.48446846 | 26.7522583  |
| Upf1    | -0.123719215 | 0.226824766 | 24.5903511  | 24.9501133  |
| Uqcr10  | -0.226063728 | 0.339661979 | 25.62530708 | 25.85279083 |
| Uqcr11  | -0.005918026 | 0.007327277 | 24.14328194 | 24.6894989  |
| Uqcrb   | -0.102604389 | 0.161273674 | 26.57484818 | 26.72208023 |
| Uqcrc1  | 0.014473438  | 0.018216029 | 28.4464016  | 28.52555656 |
| Uqcrc2  | -0.050413132 | 0.071754606 | 29.00587082 | 29.26939201 |
| Uqcrfs1 | -0.169576645 | 0.242077409 | 27.18262482 | 27.35034943 |
| Uqcrh   | -0.085243225 | 0.104697263 | 25.0214901  | 24.74365616 |
| Uqcrq   | -0.183642387 | 0.341296136 | 26.67114639 | 27.12366486 |
| Urod    | 0.032152176  | 0.055844412 | 22.52054024 | 22.51511192 |
| Usmg5   | -0.092226028 | 0.059802582 | 21.73797607 | 22.27665329 |
| Uso1    | -0.17871666  | 0.381588836 | 23.92786598 | 24.2146759  |
| Usp14   | -0.075181007 | 0.136285434 | 24.35521317 | 24.76597595 |
| Usp15   | 0.813306332  | 0.467965221 | 20.77072144 | 20.46886826 |
| Usp20   | 0.136258125  | 0.233759852 | 25.77329063 | 25.91360474 |
| Usp4    | -1.152683258 | 0.543376955 | 23.24254799 | 23.64954567 |
| Usp5    | 0.033867359  | 0.13002756  | 26.55236053 | 26.92614746 |

|          |              |             |             |             |
|----------|--------------|-------------|-------------|-------------|
| Usp7     | -0.427376747 | 0.745926448 | 22.97805977 | 22.44775963 |
| Vac14    | -0.448499203 | 1.088098732 | 20.6120739  | 20.50978279 |
| Vapa     | 0.063502789  | 0.212735172 | 25.22563744 | 25.42863846 |
| Vapb     | 0.081908226  | 0.130039369 | 24.8345108  | 24.16851997 |
| Vars     | -0.206067562 | 0.533305936 | 25.78651237 | 25.67314339 |
| Vasn     | 0.241764069  | 0.117861982 | 22.90906906 | 22.89254379 |
| Vasp     | 0.130157471  | 0.935558443 | 26.76585007 | 26.91410637 |
| Vat1     | 0.064907551  | 0.304145523 | 28.16365433 | 28.26807594 |
| Vat1l    | 0.140511036  | 0.076003603 | 20.22678185 | 22.23621941 |
| Vbp1     | 0.170424938  | 0.478201714 | 22.70678711 | 22.87370682 |
| Vcan     | 0.123871326  | 1.026092121 | 28.54499054 | 28.51968384 |
| Vcl      | 0.076272011  | 0.570641405 | 32.76440048 | 32.75128937 |
| Vcp      | 0.023126602  | 0.21514357  | 29.40340614 | 29.38806725 |
| Vdac1    | -0.048779488 | 0.257153743 | 28.45701027 | 28.39034462 |
| Vdac2    | 0.045696259  | 0.158825224 | 27.23772049 | 27.43642807 |
| Vdac3    | 0.088506699  | 0.133842784 | 24.64932632 | 25.21319199 |
| Vim      | 0.154067039  | 0.997822706 | 34.3678894  | 34.35717773 |
| Vkorc1   | 0.926190853  | 0.518014549 | 23.13902473 | 22.89962196 |
| Vkorc1l1 | -0.063521862 | 0.129307499 | 21.38863754 | 21.70108604 |
| Vps25    | 0.045212269  | 0.076538238 | 23.57542419 | 24.3089695  |
| Vps26b   | 0.02892971   | 0.070090018 | 22.4925518  | 22.71401978 |
| Vps28    | 0.478134632  | 0.598033291 | 22.28951454 | 22.68249702 |
| Vps29    | 0.106229782  | 0.200580853 | 25.05693054 | 25.44455338 |
| Vps35l   | -0.476117134 | 0.951565987 | 20.47496605 | 21.07776833 |
| Vps36    | 0.805992126  | 0.436702424 | 22.79999924 | 22.71944046 |
| Vps45    | 0.601074696  | 0.487613943 | 21.75482941 | 21.90870285 |
| Vps4a    | -0.309014797 | 0.144325642 | 21.73826408 | 21.86298752 |
| Vps4b    | -0.006831646 | 0.016627059 | 24.96666527 | 25.22409248 |
| Vta1     | -0.216374397 | 0.521234192 | 21.87335014 | 21.91495514 |
| Vtn      | 0.112242699  | 0.287536832 | 26.03384781 | 25.75320244 |
| Vwa1     | 0.301814556  | 0.431785686 | 26.03582191 | 25.64416504 |
| Vwa5a    | 0.226636887  | 0.741534511 | 25.59849548 | 25.85069466 |
| Vwa5b2   | 0.449192524  | 1.001933257 | 26.93494606 | 27.07704163 |
| Vwa8     | 0.325985909  | 0.669658176 | 22.78010559 | 22.92974663 |
| Vwf      | 0.188414097  | 0.713502787 | 27.3960743  | 27.2473526  |
| Wars     | 0.039242744  | 0.058585213 | 24.72004509 | 24.75266647 |
| Wbp2     | 0.375724792  | 0.500637777 | 22.27483368 | 22.81252861 |
| Wdr1     | 0.062448025  | 0.759045804 | 29.2280941  | 29.31613731 |
| Wdr47    | -1.182292461 | 0.765754982 | 23.20229149 | 22.5664711  |
| Wdr61    | -0.0373106   | 0.055863158 | 23.85271835 | 23.84153366 |
| Wfs1     | 0.167385578  | 0.567080203 | 27.40932655 | 27.46138954 |

|         |              |             |             |             |
|---------|--------------|-------------|-------------|-------------|
| Wisp2   | -0.023259163 | 0.063621002 | 26.40534019 | 26.64196205 |
| Xpnpep1 | 0.00156498   | 0.001654634 | 23.51135254 | 24.03170586 |
| Xpo1    | 0.063468456  | 0.272719997 | 25.71599388 | 25.86008072 |
| Xxylt1  | 0.26612854   | 0.095672994 | 19.64884186 | 22.08108902 |
| Yars    | 0.455374241  | 0.94744643  | 24.54480553 | 24.39145851 |
| Ybx1    | -0.482237339 | 0.56690477  | 22.25439072 | 20.78012657 |
| Yes1    | -0.429020882 | 0.603804239 | 21.43818283 | 22.65778923 |
| Ykt6    | 0.623011589  | 0.239818079 | 21.19441223 | 23.62734032 |
| Ywhab   | -0.10967207  | 0.269386403 | 27.65621948 | 27.45528793 |
| Ywhae   | -0.079799175 | 0.198848045 | 28.42981911 | 27.97426796 |
| Ywhag   | -0.114621162 | 0.268966839 | 28.27244186 | 28.22637367 |
| Ywhah   | -0.099891663 | 0.255412068 | 26.16399956 | 25.81736183 |
| Ywhaq   | -0.184412479 | 1.069745726 | 28.70411491 | 28.86779404 |
| Ywhaz   | 0.004002094  | 0.018886745 | 30.28372192 | 30.0787735  |
| Zak     | -0.02218008  | 0.026419189 | 24.83662987 | 24.71455383 |
| Zc3h4   | 0.36246109   | 0.439679703 | 20.45108414 | 21.66994095 |
| Zfp36l1 | -0.676576614 | 0.427023088 | 21.0664444  | 19.47165489 |
| Zfp58   | 0.250787735  | 0.555434374 | 22.85374832 | 22.89884758 |
| Zw10    | 0.573152065  | 0.433135159 | 22.69017029 | 22.0981884  |
| Zyx     | 0.18540287   | 0.455487388 | 29.55076218 | 30.01810265 |

05) highlighted in red (increased abundance) or green (decreased abundance). LFQ repre

| Log2(LFQ Col8-/-_3) | Log2(LFQ Col8-/-_4) | Log2(LFQ Col8+/+_1) | Log2(LFQ Col8+/+_2) |
|---------------------|---------------------|---------------------|---------------------|
| 19.92785645         | 24.36566353         | 20.28250313         | 19.84260178         |
| 22.38434792         | 23.09500313         | 19.93694115         | 20.24948502         |
| 22.88706779         | 23.13658524         | 20.62635422         | 19.41751862         |
| 23.17377472         | 22.44970131         | 22.20689201         | 20.08994293         |
| 21.10994339         | 23.02259064         | 20.18641663         | 21.15053368         |
| 23.45312119         | 24.37417984         | 23.14878464         | 22.1770649          |
| 22.26103592         | 22.41348839         | 19.50150299         | 19.36481476         |
| 21.99951744         | 21.9642334          | 21.17842293         | 21.23794746         |
| 22.43484116         | 23.37623596         | 20.16857719         | 20.57624435         |
| 22.12779808         | 21.16097069         | 19.51774025         | 20.87441063         |
| 21.93084717         | 22.9192524          | 22.1727066          | 20.2921524          |
| 22.74092102         | 22.56188011         | 22.22511482         | 20.80402756         |
| 27.29368782         | 26.75887871         | 25.76976395         | 25.35685921         |
| 29.21011162         | 28.91911697         | 27.6689167          | 27.62554359         |
| 23.2528038          | 22.81182289         | 21.20606041         | 22.04526901         |
| 22.7015934          | 22.74396324         | 22.04606819         | 21.83151817         |
| 28.13315392         | 27.6069603          | 27.03956985         | 26.54523277         |
| 25.80410194         | 26.34830666         | 24.70049477         | 25.27604294         |
| 30.21315002         | 30.58557701         | 29.84753799         | 29.73747444         |
| 27.18357086         | 27.32637405         | 26.47049522         | 26.20050812         |
| 23.70598602         | 23.36826324         | 22.93043137         | 22.28861427         |
| 23.13830566         | 23.40924644         | 22.8807106          | 22.99296379         |
| 25.60566139         | 25.50787926         | 25.38965607         | 25.48876381         |
| 24.19557953         | 24.47060394         | 23.80842972         | 24.37636757         |
| 24.94873238         | 25.05936623         | 24.18608665         | 24.79069328         |
| 25.42547226         | 25.47676468         | 25.02487564         | 24.82880974         |
| 24.97425652         | 25.22482872         | 24.30952454         | 24.63084221         |
| 24.73044777         | 24.71612549         | 24.35110664         | 23.7470417          |
| 27.83406448         | 27.73737717         | 27.34274101         | 27.23004341         |
| 23.80005836         | 23.77283669         | 22.83031845         | 23.55847549         |
| 27.43324661         | 27.39247513         | 26.75136375         | 26.82917213         |
| 25.66801071         | 25.41189766         | 25.2112999          | 25.00727272         |
| 24.97013664         | 24.98041534         | 24.62911987         | 24.38284492         |
| 23.28220749         | 23.24474144         | 23.17206573         | 23.17259979         |
| 25.89441872         | 25.75704956         | 25.468647           | 25.70543289         |
| 24.06192207         | 24.18442345         | 23.68388939         | 23.52790833         |
| 25.69181633         | 25.56952667         | 25.03640747         | 25.29970741         |

|             |             |             |             |
|-------------|-------------|-------------|-------------|
| 25.04481125 | 25.29841614 | 24.80607033 | 25.02165985 |
| 25.58276367 | 25.58760643 | 25.32484818 | 24.86414909 |
| 30.31386757 | 30.20874023 | 29.98413658 | 29.86385727 |
| 32.82962036 | 32.96282196 | 32.5949707  | 32.51516724 |
| 25.53127289 | 25.52832413 | 25.03783226 | 25.02360725 |
| 25.33353996 | 25.02955818 | 24.90752029 | 24.92795753 |
| 29.58713531 | 29.33202171 | 29.0980835  | 29.07510567 |
| 30.02273941 | 30.01025391 | 29.64161682 | 29.78606224 |
| 27.17654991 | 27.42742348 | 26.96433067 | 26.86336899 |
| 22.93634033 | 23.08901596 | 22.64599037 | 22.6766777  |
| 28.39513397 | 28.41872597 | 28.24008942 | 28.01812935 |
| 27.42374229 | 27.4856205  | 27.40381241 | 27.28038597 |
| 26.46866226 | 26.21567535 | 26.08300209 | 26.10525513 |
| 27.23626137 | 27.21252441 | 26.82310867 | 26.99830437 |
| 29.10301971 | 29.16937637 | 28.6999855  | 28.70780373 |
| 29.95449066 | 29.7781086  | 29.42722321 | 29.30458641 |
| 25.49865723 | 25.44205666 | 25.26852989 | 25.22368813 |
| 26.28167725 | 26.45989037 | 25.90784073 | 26.12212372 |
| 26.25448799 | 26.54281425 | 26.10603523 | 26.13131905 |
| 28.38599205 | 28.3563652  | 28.1671524  | 28.15802956 |
| 31.96986961 | 32.15990448 | 31.90712929 | 31.7040062  |
| 25.26004601 | 25.28520966 | 24.99765778 | 25.01529312 |
| 25.27976608 | 25.45214844 | 25.1513958  | 24.77750969 |
| 31.08910561 | 31.17104721 | 30.57145119 | 30.87650108 |
| 26.41913605 | 26.5780201  | 26.17795753 | 26.22495651 |
| 30.55700302 | 30.77995682 | 30.42051315 | 30.37098312 |
| 28.89351082 | 29.07387924 | 28.68655586 | 28.61009789 |
| 26.66302299 | 26.64787292 | 26.22105217 | 26.19584274 |
| 32.40438461 | 32.1750679  | 32.1015892  | 31.95286179 |
| 32.16901779 | 32.33314133 | 31.85110283 | 31.92234612 |
| 32.59934616 | 32.64407349 | 32.4700737  | 32.44532013 |
| 33.31945038 | 33.19423676 | 32.96452713 | 32.96225357 |
| 29.53569603 | 29.73869705 | 29.44980812 | 29.38195419 |
| 25.10181427 | 25.14406013 | 24.77444649 | 24.77369308 |
| 29.63223457 | 29.69877625 | 29.42015266 | 29.38123322 |
| 25.01618576 | 25.0888958  | 24.82546425 | 24.68971252 |
| 29.49973297 | 29.54203987 | 29.35747719 | 29.42836189 |
| 28.67774773 | 28.5362339  | 28.33325958 | 28.34460449 |
| 28.96215248 | 28.97560692 | 28.98888397 | 28.86964798 |
| 26.58992195 | 26.77026749 | 26.50618553 | 26.40260887 |
| 32.2613945  | 32.17610931 | 31.9552536  | 31.85945702 |



|             |             |             |             |
|-------------|-------------|-------------|-------------|
| 30.00155449 | 29.99765778 | 29.81554031 | 29.81622696 |
| 28.52121925 | 28.60102081 | 28.28184509 | 28.45705032 |
| 26.56328392 | 26.68885803 | 26.49286461 | 26.46651649 |
| 32.16662598 | 32.19078064 | 31.95466423 | 31.85326004 |
| 28.85706329 | 28.86458015 | 28.66475296 | 28.70011711 |
| 30.93557739 | 30.90533829 | 30.78534508 | 30.83447075 |
| 25.09988976 | 24.92451859 | 24.85119438 | 24.76395226 |
| 30.79110336 | 30.74943161 | 30.70190239 | 30.54738235 |
| 25.65744591 | 25.60390854 | 25.55809593 | 25.51086998 |
| 32.3540535  | 32.39721298 | 32.25008392 | 32.10948563 |
| 28.01659012 | 27.93702507 | 27.83177185 | 27.77611732 |
| 30.00985336 | 30.00222588 | 29.92578125 | 29.83090973 |
| 29.40778732 | 29.46497536 | 29.40490913 | 29.36181259 |
| 26.22978783 | 26.2207756  | 26.31276512 | 26.25349617 |
| 27.37964439 | 27.49258995 | 27.54229736 | 27.54951286 |
| 27.74733543 | 27.70140648 | 27.98891068 | 27.79643631 |
| 31.97968102 | 32.10577774 | 32.16374969 | 32.14488602 |
| 26.75722694 | 26.95914268 | 26.92512894 | 27.15846252 |
| 30.92648697 | 31.02472115 | 31.12810898 | 31.11830139 |
| 25.40733528 | 25.37315178 | 25.78076744 | 25.48000526 |
| 26.83845901 | 26.91444778 | 27.10259438 | 27.12927628 |
| 24.56377792 | 24.32615089 | 24.73106956 | 24.6102047  |
| 27.12504387 | 27.15807724 | 27.42510414 | 27.3537178  |
| 26.91159439 | 26.76660919 | 27.07152939 | 26.91775131 |
| 29.3886013  | 29.54811668 | 29.64636421 | 29.63091469 |
| 23.42611313 | 23.53587723 | 23.64118958 | 23.80124283 |
| 26.15085411 | 26.09168243 | 26.28794098 | 26.42527962 |
| 29.59958458 | 29.57161522 | 29.69794846 | 29.63129807 |
| 28.09536934 | 28.29784775 | 28.25300026 | 28.44177818 |
| 25.71329498 | 26.09301376 | 26.23075867 | 26.19102859 |
| 25.11715698 | 25.33302879 | 25.44335365 | 25.30772018 |
| 24.91026688 | 24.9955883  | 25.14254189 | 25.15880966 |
| 26.24869156 | 26.15129852 | 26.39331055 | 26.58161545 |
| 23.9519825  | 24.16553307 | 24.36766434 | 24.26391792 |
| 24.4785862  | 24.77243423 | 24.84038162 | 24.84421921 |
| 23.68613625 | 23.94779778 | 23.93669891 | 24.02664948 |
| 26.72754288 | 26.91010666 | 26.99819565 | 27.13819313 |
| 22.322649   | 22.50879288 | 22.90743637 | 22.81425095 |
| 23.5716114  | 23.73562241 | 23.89226532 | 23.86881828 |
| 25.46391678 | 25.67449188 | 25.84309196 | 25.96591568 |
| 23.74745178 | 23.54663086 | 24.02225304 | 23.89633751 |

|             |             |             |             |
|-------------|-------------|-------------|-------------|
| 25.30528641 | 25.35528183 | 25.59721756 | 25.42908478 |
| 26.11316872 | 26.37635231 | 26.38469124 | 26.30898666 |
| 24.58623314 | 24.47920418 | 24.72171593 | 24.89110756 |
| 26.79141426 | 26.84685135 | 27.00827789 | 27.06352806 |
| 26.46908188 | 26.95704079 | 26.97125626 | 27.3033886  |
| 23.87764359 | 24.32717896 | 24.6063118  | 24.388834   |
| 25.40054321 | 25.67238808 | 25.89384079 | 25.95178223 |
| 23.25508308 | 23.39910889 | 23.81137276 | 23.70419312 |
| 25.61815262 | 25.53061867 | 25.71670151 | 25.73987579 |
| 20.47070313 | 20.94692421 | 21.11897659 | 21.12218285 |
| 27.63484955 | 27.73827934 | 27.97781944 | 28.36181259 |
| 27.4368248  | 27.35321236 | 27.8511467  | 27.63879013 |
| 24.22854042 | 24.71931458 | 24.65867233 | 24.86976051 |
| 26.31848335 | 26.8175087  | 26.72637367 | 26.89133835 |
| 24.05424118 | 24.18744659 | 24.70888329 | 24.59360313 |
| 24.46506882 | 24.3467865  | 24.72181892 | 24.6866703  |
| 23.1223259  | 23.32306099 | 23.69498062 | 23.9013176  |
| 25.23344803 | 25.69657326 | 25.92759514 | 25.89131546 |
| 27.8176918  | 27.13965607 | 27.99663544 | 27.8272953  |
| 24.46594238 | 25.37165642 | 25.60673523 | 25.42136765 |
| 24.92782211 | 25.44638443 | 25.73324394 | 25.7564373  |
| 23.12549782 | 23.26899338 | 24.12549782 | 24.04393578 |
| 20.46622849 | 20.64930534 | 20.80962753 | 21.21773911 |
| 22.9197979  | 23.39832687 | 24.01758766 | 23.91752434 |
| 24.52276993 | 24.57928658 | 25.24901772 | 25.11680031 |
| 19.44439125 | 19.74071884 | 20.33854103 | 20.38469124 |
| 23.24270821 | 23.65436172 | 24.45801353 | 24.60710144 |
| 21.66114235 | 20.86885452 | 21.99527931 | 22.86325073 |
| 25.14926529 | 24.14546013 | 25.33258438 | 25.47416687 |
| 23.94046783 | 24.08836937 | 25.25418091 | 24.2920742  |
| 19.68317032 | 19.78094292 | 21.06937599 | 20.51806831 |
| 24.65790939 | 24.50688171 | 25.6315918  | 25.81090736 |
| 21.12003326 | 20.31137276 | 21.31792068 | 22.37710953 |
| 21.63280678 | 22.56776428 | 22.27775955 | 23.17957115 |
| 24.27426529 | 23.79590416 | 23.95881081 | 24.84230042 |
| 20.88434982 | 20.13596916 | 21.63458061 | 21.60385895 |
| 28.64794159 | 28.21904945 | 28.88553238 | 29.95032501 |
| 19.85429573 | 21.07038307 | 21.45843887 | 21.74131203 |
| 20.95232582 | 21.26516342 | 22.00034332 | 22.09580803 |
| 21.97519302 | 22.97882843 | 23.35649109 | 23.49460411 |
| 27.11277008 | 27.04635239 | 27.556036   | 27.4873848  |

|             |             |             |             |
|-------------|-------------|-------------|-------------|
| 21.2585659  | 20.46716499 | 21.98731995 | 21.02113533 |
| 19.18548584 | 19.81465721 | 21.35241699 | 20.49091339 |
| 20.72733498 | 21.12496185 | 22.07221603 | 22.18721962 |
| 23.52504158 | 23.97044373 | 24.20500946 | 25.47840118 |
| 20.03159904 | 19.81428719 | 21.79986    | 22.01226044 |
| 19.84213257 | 20.41487312 | 22.38426971 | 22.96448135 |
| 23.109869   | 21.63553619 | 24.11569023 | 24.19760513 |
| 21.1754818  | 22.1207943  | 21.91139793 | 23.42342186 |
| 20.31993675 | 20.11826897 | 24.19219589 | 24.36546326 |
| 19.73628616 | 20.30764771 | 22.26244164 | 22.70994568 |
| 19.94264412 | 21.23308182 | 23.54933739 | 23.65436172 |
| 21.77090073 | 20.70841599 | 21.13449097 | 25.51102066 |
| 21.46056747 | 21.22204018 | 20.91109657 | 24.56430244 |
| 21.36730385 | 19.07199287 | 20.66487312 | 25.2524147  |
| 19.33287239 | 19.45710373 | 20.24070168 | 25.52420425 |
| 29.93480492 | 29.60475349 | 30.17080879 | 30.16026688 |
| 25.22210312 | 25.39411163 | 24.88105774 | 25.18940926 |
| 20.44216919 | 21.35496902 | 21.07025146 | 22.46533203 |
| 24.10341644 | 24.62382889 | 24.53700447 | 24.90246773 |
| 22.16750908 | 23.06357002 | 22.36855698 | 22.81043053 |
| 22.90107918 | 23.05107498 | 23.13213539 | 23.64063835 |
| 23.52013397 | 23.25508308 | 23.75103188 | 23.7645607  |
| 23.43364525 | 23.0575676  | 23.14870644 | 23.31465149 |
| 21.30607986 | 21.83757401 | 21.41281509 | 21.725214   |
| 23.91159439 | 23.91679573 | 23.99489975 | 24.11933708 |
| 24.57137871 | 24.90260696 | 24.38363647 | 24.49673843 |
| 24.86263657 | 24.87591171 | 24.50312424 | 24.65463638 |
| 23.85100365 | 22.50105476 | 23.96675301 | 24.01256752 |
| 22.79550743 | 23.15573311 | 23.38824272 | 23.17024803 |
| 22.35107994 | 22.5766716  | 20.60582733 | 22.35463524 |
| 25.43793488 | 25.66568184 | 25.45067024 | 25.56045914 |
| 25.61748123 | 26.17075729 | 25.75427246 | 25.78419113 |
| 29.15032578 | 28.68659019 | 30.44351959 | 28.99822235 |
| 25.13018036 | 24.34306335 | 25.19636726 | 24.98198318 |
| 22.32289696 | 22.39157677 | 23.02855492 | 20.06343842 |
| 23.48456001 | 23.72140121 | 23.42700768 | 23.42483139 |
| 28.45222664 | 27.74778366 | 29.54231644 | 28.36669731 |
| 28.4932003  | 27.98381042 | 29.33063316 | 28.29039574 |
| 26.92592239 | 27.06424904 | 27.99614906 | 26.97683716 |
| 25.29775047 | 25.1315937  | 25.54965973 | 25.4192791  |
| 28.00303078 | 27.76053047 | 29.18579483 | 28.03102112 |

|             |             |             |             |
|-------------|-------------|-------------|-------------|
| 27.36753082 | 27.6376152  | 27.03925705 | 27.13045502 |
| 29.07913017 | 28.73773193 | 29.44132423 | 28.92016792 |
| 25.03510857 | 25.27969551 | 25.38353729 | 25.3415699  |
| 22.86270332 | 21.52936935 | 22.87556458 | 23.37967682 |
| 28.1572094  | 27.93348312 | 28.0922966  | 28.19638634 |
| 26.60583115 | 26.78069305 | 26.89214897 | 26.80143929 |
| 29.93550873 | 29.35909081 | 30.90045166 | 29.70318985 |
| 23.43033028 | 23.88818359 | 24.74960136 | 24.03607368 |
| 25.17298889 | 25.46653366 | 25.5412941  | 24.86717033 |
| 23.55543518 | 22.86308098 | 21.5865078  | 23.38758659 |
| 26.58060837 | 26.8289299  | 26.75021553 | 26.4056797  |
| 24.5552597  | 24.95646477 | 24.91597557 | 25.14522743 |
| 22.52025414 | 20.17154121 | 23.62075615 | 22.26461983 |
| 19.83329391 | 20.2676239  | 18.98584557 | 21.56018257 |
| 28.18011284 | 27.8699131  | 28.80906677 | 28.33530426 |
| 21.36635971 | 21.22464561 | 21.200243   | 22.09343719 |
| 28.01105309 | 27.48069954 | 26.96587181 | 27.16489983 |
| 35.50341034 | 35.64361191 | 35.49124527 | 35.39487076 |
| 33.60355377 | 33.69695663 | 33.52705765 | 33.44862366 |
| 23.11368942 | 22.8817749  | 22.47231483 | 22.73913002 |
| 29.44638062 | 29.3832531  | 28.86384201 | 28.97440529 |
| 24.13703918 | 23.43834877 | 24.00752831 | 23.38047028 |
| 24.62756157 | 24.69184303 | 24.70619774 | 25.18876839 |
| 26.74547768 | 27.28700829 | 27.17436218 | 27.28100395 |
| 28.20643616 | 28.56623459 | 28.42334175 | 28.38451004 |
| 29.44320297 | 29.68685722 | 29.54629707 | 29.35691071 |
| 23.53516579 | 23.75755692 | 23.80508614 | 23.98215675 |
| 21.78144836 | 20.15222168 | 20.54990196 | 19.84856415 |
| 22.8805809  | 23.09180069 | 23.02961731 | 22.84710884 |
| 24.01563263 | 24.38462448 | 25.21826553 | 23.75317764 |
| 25.06620026 | 25.29610634 | 25.1741333  | 25.28905106 |
| 21.3995266  | 21.57722473 | 21.84617043 | 21.66487885 |
| 23.64306259 | 23.78066635 | 22.50198364 | 22.76854324 |
| 26.76673508 | 26.63256264 | 26.81237602 | 27.03601074 |
| 22.70632362 | 22.6083107  | 23.76263428 | 20.65671349 |
| 25.322752   | 25.24437904 | 24.95024681 | 24.99394989 |
| 25.09932709 | 25.42460823 | 24.86990166 | 26.35989571 |
| 21.9473877  | 21.49877357 | 21.29125786 | 21.61436653 |
| 20.65711403 | 22.60061836 | 21.68286133 | 21.91327477 |
| 19.36998749 | 21.34261513 | 21.57334518 | 21.98039818 |
| 25.39407921 | 25.84182167 | 25.68819237 | 25.50297165 |

|             |             |             |             |
|-------------|-------------|-------------|-------------|
| 22.4975071  | 22.09972954 | 22.30215073 | 20.79932022 |
| 22.48249435 | 22.74868011 | 22.46694946 | 22.44293594 |
| 20.46891403 | 20.68676376 | 21.06065369 | 21.25072479 |
| 20.53552818 | 24.23257065 | 23.51219559 | 23.9201622  |
| 24.09980965 | 20.50147057 | 23.26327324 | 24.61728477 |
| 22.3283577  | 22.39254761 | 22.54238701 | 21.18259811 |
| 25.53670692 | 25.1602726  | 25.35474396 | 25.30525208 |
| 26.75378799 | 26.40078735 | 26.37237167 | 26.41598129 |
| 23.70324326 | 23.34638023 | 23.52205086 | 23.43504524 |
| 24.16138649 | 24.3467865  | 24.29354668 | 24.20015335 |
| 29.88707352 | 29.34053421 | 29.18874359 | 29.68106842 |
| 24.37046051 | 24.62488747 | 24.83151817 | 23.91743279 |
| 22.50377846 | 23.14647102 | 21.25764465 | 20.88464546 |
| 24.69805717 | 25.31858635 | 24.95051384 | 24.54020119 |
| 23.62377167 | 24.07920074 | 23.87361336 | 23.86069679 |
| 23.08354187 | 23.73034477 | 23.12579727 | 22.01226425 |
| 27.3902626  | 27.5610714  | 27.91170883 | 27.44332123 |
| 26.55020332 | 26.56331253 | 27.08537483 | 27.10679436 |
| 27.20303154 | 27.0940609  | 27.02580452 | 26.85531235 |
| 25.97591972 | 26.30197716 | 25.54789734 | 25.86211586 |
| 27.16758347 | 27.17359924 | 27.19121742 | 27.03443718 |
| 27.8289299  | 27.90276718 | 27.73169136 | 27.95947456 |
| 23.70419312 | 23.85490799 | 23.62778473 | 23.63489151 |
| 25.07524681 | 25.49133492 | 25.43923569 | 25.44578552 |
| 24.40833855 | 24.75338173 | 24.8094101  | 24.54356766 |
| 22.19871521 | 22.00747681 | 22.02550125 | 21.5124855  |
| 22.59087753 | 23.38666534 | 20.62261391 | 23.42751884 |
| 34.38181305 | 33.74324417 | 34.27960587 | 34.37651825 |
| 24.36879539 | 24.89370155 | 25.22457123 | 25.26259232 |
| 20.48679543 | 20.54961967 | 19.44496536 | 20.57614708 |
| 22.07172585 | 22.45986557 | 21.68007278 | 20.89136314 |
| 24.86145401 | 23.8080368  | 23.42879677 | 24.11577034 |
| 22.22001648 | 23.22212601 | 23.18975639 | 22.92388344 |
| 30.64838791 | 30.6428051  | 30.5650177  | 30.59885788 |
| 26.02681732 | 26.01915932 | 25.81863022 | 26.00684357 |
| 24.64069366 | 23.66090393 | 24.17873573 | 24.09039116 |
| 22.48502731 | 21.91345787 | 22.35458183 | 21.90994644 |
| 27.74085426 | 28.19798088 | 28.3001194  | 27.80119324 |
| 26.69736862 | 26.83508873 | 26.7894249  | 26.64993095 |
| 29.59028053 | 29.32485199 | 30.15713692 | 29.54250145 |
| 21.70328522 | 21.59841537 | 22.26123238 | 21.60394859 |

|             |             |             |             |
|-------------|-------------|-------------|-------------|
| 20.95297813 | 21.50610542 | 21.3020668  | 20.22773552 |
| 24.34570503 | 23.9057312  | 24.10773087 | 21.11341095 |
| 22.0025425  | 22.48040009 | 20.18956184 | 22.27994347 |
| 26.88285255 | 27.25907707 | 26.66302299 | 27.13565063 |
| 23.42560005 | 23.28079224 | 23.91360474 | 23.88334274 |
| 20.18978691 | 20.39926529 | 22.29182053 | 21.27116203 |
| 24.13414383 | 24.4127388  | 23.95730591 | 24.25053596 |
| 24.88595009 | 25.30851936 | 25.39090157 | 24.94131851 |
| 24.92025375 | 24.86169052 | 25.04514313 | 24.60444641 |
| 25.030653   | 25.05833435 | 25.56447601 | 24.6776123  |
| 28.52297783 | 28.65887642 | 28.35451698 | 28.39591026 |
| 27.63436508 | 27.77511215 | 27.91096497 | 27.93421555 |
| 28.34057808 | 28.56608963 | 28.62299728 | 28.70763969 |
| 31.37725639 | 31.36968422 | 31.3622303  | 31.27269745 |
| 27.70701408 | 27.62044907 | 27.6092186  | 27.76426888 |
| 31.62082481 | 31.80850792 | 31.72167206 | 31.7445488  |
| 23.16842842 | 23.43491745 | 23.46326256 | 23.4719677  |
| 24.49740982 | 24.36365891 | 24.07259178 | 24.73871803 |
| 22.5598526  | 23.21621513 | 22.74980545 | 22.70252419 |
| 26.91467667 | 27.19779205 | 26.99884224 | 27.08172226 |
| 27.87660217 | 28.21877289 | 27.98261452 | 28.10394669 |
| 27.83394432 | 28.15388107 | 27.96900558 | 27.98152542 |
| 26.61498451 | 26.57344627 | 26.63478088 | 26.69869423 |
| 24.05978012 | 24.85424232 | 24.42962837 | 24.66362    |
| 23.71868706 | 24.33912468 | 24.14063263 | 23.568367   |
| 22.63946915 | 22.65501785 | 22.74225807 | 22.81432915 |
| 22.32465553 | 23.73221016 | 23.64262199 | 23.60161591 |
| 23.99972343 | 24.44050407 | 24.16698837 | 24.25060844 |
| 23.40119362 | 21.4009552  | 23.44088364 | 23.79312706 |
| 29.1357975  | 27.93590164 | 28.69072533 | 28.64873123 |
| 27.0590992  | 26.84481621 | 27.09968948 | 26.99075127 |
| 25.48572731 | 25.02483368 | 25.95847893 | 25.67720985 |
| 27.16221428 | 26.6408596  | 27.22775078 | 27.41796112 |
| 24.44632149 | 24.12778282 | 24.36666298 | 24.35366631 |
| 23.9982605  | 21.02541924 | 24.02174377 | 24.30089569 |
| 25.50491333 | 25.23355865 | 25.16111755 | 24.92976379 |
| 27.21447182 | 27.41771889 | 26.90644264 | 27.23662758 |
| 22.39869118 | 21.9840889  | 22.6210022  | 22.58276939 |
| 23.95588875 | 24.6352787  | 24.62343788 | 24.04276657 |
| 24.24778748 | 24.06972694 | 24.01503754 | 24.09595299 |
| 24.79877281 | 25.27156067 | 25.09393883 | 25.45729256 |

|             |             |             |             |
|-------------|-------------|-------------|-------------|
| 26.12931633 | 25.43755531 | 24.60110474 | 25.71156311 |
| 25.36332512 | 25.00260162 | 25.18952179 | 25.07838631 |
| 27.22775078 | 27.32423019 | 27.58691978 | 27.62142754 |
| 21.81882095 | 21.83402824 | 21.63608551 | 21.76951218 |
| 25.8137722  | 26.12474823 | 24.87384796 | 26.38534927 |
| 23.14053917 | 23.39949989 | 20.65918732 | 22.81743622 |
| 21.95850945 | 21.67620277 | 20.86811638 | 21.80774117 |
| 20.72334099 | 20.88472176 | 20.79296875 | 20.60068512 |
| 26.34440041 | 26.51444054 | 26.53261185 | 26.5625267  |
| 23.48468399 | 23.54533577 | 23.53730011 | 24.00204468 |
| 27.64388847 | 27.73963165 | 27.7498951  | 27.74271774 |
| 28.50544357 | 28.26369476 | 28.33321571 | 28.27364349 |
| 23.82861519 | 23.84115028 | 23.74550438 | 23.75154305 |
| 23.64118958 | 23.41428757 | 23.65829086 | 23.47852516 |
| 20.52056503 | 23.6506424  | 23.32553291 | 21.45729065 |
| 23.88864708 | 23.79332542 | 23.46288681 | 23.87932777 |
| 25.0868721  | 25.34972572 | 25.14662552 | 25.26728058 |
| 22.76706886 | 22.47278595 | 22.83589935 | 22.97168922 |
| 25.84615707 | 25.63522339 | 25.78431702 | 25.55651665 |
| 25.01286507 | 25.04247475 | 24.73753166 | 25.13938332 |
| 23.88557816 | 24.10181427 | 23.97666168 | 23.82366753 |
| 28.16763115 | 28.64151382 | 28.41477966 | 28.38706017 |
| 27.24435997 | 27.29998779 | 27.36836433 | 27.57924271 |
| 27.74759293 | 27.70266151 | 27.54561615 | 27.57967377 |
| 28.27590942 | 28.3631916  | 28.30264854 | 28.33577347 |
| 25.41670609 | 25.63931465 | 25.37441254 | 25.51023483 |
| 24.39754295 | 24.80798721 | 24.85813713 | 24.79143906 |
| 25.2550106  | 25.53557968 | 25.32896042 | 25.18759727 |
| 23.51376343 | 22.82927322 | 23.66849899 | 23.47766113 |
| 23.51002502 | 24.17934418 | 24.04685211 | 23.72327805 |
| 26.25373077 | 26.13516045 | 25.93968391 | 25.92506218 |
| 31.67366791 | 31.72635078 | 31.53894424 | 31.5570488  |
| 21.25406265 | 22.30162048 | 22.44576645 | 22.40241814 |
| 21.90657425 | 21.84597969 | 21.88550377 | 21.24894333 |
| 22.97669601 | 23.25580406 | 22.63023186 | 22.2991066  |
| 21.88341713 | 23.04633522 | 22.21889305 | 22.51693916 |
| 27.3558197  | 27.54965973 | 27.52005768 | 27.6685791  |
| 22.96407509 | 22.88756943 | 21.99672699 | 22.44255638 |
| 27.92750549 | 28.12470055 | 28.01701355 | 28.00865173 |
| 26.25292015 | 25.74939728 | 25.67882156 | 26.01192856 |
| 27.65492249 | 27.44797707 | 27.34832382 | 27.45458221 |

|             |             |             |             |
|-------------|-------------|-------------|-------------|
| 26.11275101 | 25.04606056 | 25.01150131 | 25.56830978 |
| 25.61689186 | 25.55332756 | 25.63342285 | 25.58917999 |
| 27.58813667 | 27.69849586 | 27.81695938 | 27.62763214 |
| 23.74980545 | 23.85861206 | 23.50857353 | 23.42675209 |
| 21.88937187 | 22.36121178 | 20.68705368 | 22.0313015  |
| 26.22480965 | 26.42334175 | 26.2477684  | 26.42507172 |
| 30.62339973 | 30.6553154  | 30.63927269 | 30.67547798 |
| 31.45238304 | 31.49342918 | 31.57673073 | 31.51559067 |
| 26.93898773 | 26.92524338 | 27.05030251 | 27.00774193 |
| 27.79977417 | 27.57441521 | 27.64051437 | 28.0799427  |
| 27.34680367 | 27.25772858 | 27.32817268 | 27.15460396 |
| 24.76622963 | 24.86443329 | 24.96481514 | 24.54037857 |
| 23.84613228 | 19.3735199  | 23.13354683 | 20.15570831 |
| 25.70661926 | 25.9403553  | 26.09029007 | 26.11441994 |
| 29.01916313 | 29.16753578 | 29.07640457 | 29.01916313 |
| 21.96564293 | 21.89500618 | 20.54518509 | 21.41333199 |
| 25.13653183 | 24.08107185 | 23.90416908 | 21.14152718 |
| 25.48357582 | 25.2669239  | 25.41586876 | 25.43749046 |
| 21.56676483 | 21.06946564 | 21.01420212 | 20.24423409 |
| 23.26785278 | 23.71313858 | 23.62800789 | 23.68367577 |
| 21.82489204 | 22.68504524 | 22.30580139 | 22.67603111 |
| 22.34648895 | 19.80333328 | 23.29445839 | 22.56411552 |
| 23.32827568 | 23.16752625 | 23.1368351  | 22.94754791 |
| 24.51568985 | 24.7810173  | 24.99425125 | 24.87290955 |
| 19.66628838 | 22.77182961 | 22.41002274 | 19.24309731 |
| 25.48508263 | 24.95304871 | 24.82570648 | 24.90687752 |
| 21.81130219 | 22.33581734 | 21.63871384 | 21.90675926 |
| 27.86230659 | 28.10973549 | 27.79680634 | 27.83803749 |
| 22.90747452 | 22.89502335 | 22.73770714 | 23.12434578 |
| 28.47626305 | 28.37761879 | 28.27599716 | 28.27781677 |
| 20.55964279 | 20.88814545 | 20.19503784 | 21.10399246 |
| 21.33745193 | 21.48973846 | 21.42141533 | 21.26619339 |
| 23.7165966  | 23.43936348 | 23.96393394 | 23.65839958 |
| 22.96017265 | 23.70345497 | 24.71497345 | 23.57357597 |
| 21.39105225 | 21.83491516 | 21.75401306 | 22.9392128  |
| 24.89439583 | 25.04159737 | 24.63245201 | 24.99157333 |
| 24.53913498 | 25.27721405 | 24.65102577 | 25.03279877 |
| 25.53376961 | 25.20288277 | 25.1091671  | 25.64507103 |
| 21.15933418 | 22.3364315  | 20.32685089 | 20.7525444  |
| 24.11949539 | 24.7358284  | 24.39937019 | 24.85167122 |
| 21.58421516 | 22.61112785 | 22.06985855 | 22.0435009  |



|             |             |             |             |
|-------------|-------------|-------------|-------------|
| 22.05599594 | 22.33815956 | 22.01000786 | 22.17648697 |
| 21.32865906 | 21.67495346 | 19.86559105 | 20.06594086 |
| 19.3846283  | 19.47611237 | 19.64963913 | 20.08550453 |
| 25.16683578 | 24.48173141 | 24.91456223 | 24.36719704 |
| 27.86141968 | 27.67134857 | 27.86230659 | 27.82735634 |
| 25.41419029 | 25.95584297 | 25.37125778 | 25.1862011  |
| 22.45938873 | 22.63154221 | 22.80140114 | 23.09534073 |
| 21.82869339 | 21.56991959 | 21.45281982 | 21.6306324  |
| 24.32216835 | 23.23594856 | 23.33497238 | 21.64513206 |
| 28.10639381 | 26.83677483 | 27.74848747 | 27.80488968 |
| 29.31583405 | 28.04301643 | 29.86929512 | 29.74534988 |
| 25.41151047 | 25.36135101 | 25.40590668 | 25.44922256 |
| 22.28824806 | 22.22764397 | 20.54746056 | 22.67009926 |
| 22.39223289 | 22.87708282 | 22.66270828 | 22.94754791 |
| 27.21243286 | 26.68083382 | 27.06074905 | 26.93629456 |
| 27.86336899 | 27.42582321 | 27.41045952 | 27.39451981 |
| 23.34638023 | 24.03548622 | 24.72312164 | 24.78910255 |
| 23.00799179 | 23.18904686 | 23.41789627 | 23.33115005 |
| 27.50241089 | 27.65539932 | 27.53096008 | 27.36869621 |
| 26.21525002 | 26.43273735 | 26.26731682 | 25.90664864 |
| 21.14388847 | 22.15360069 | 22.20654488 | 22.83172989 |
| 28.07280731 | 28.13114357 | 28.24054527 | 28.33955956 |
| 28.43300819 | 28.13486671 | 28.05708504 | 27.86797142 |
| 30.32967186 | 30.52477264 | 30.54489708 | 30.78316116 |
| 26.79315186 | 26.86702919 | 27.0131855  | 27.03275681 |
| 25.74624634 | 25.88469315 | 25.31489182 | 25.48578835 |
| 24.45029259 | 24.91679573 | 24.64196205 | 24.30424118 |
| 28.28674316 | 28.8877697  | 28.65188026 | 28.86502266 |
| 28.25615501 | 28.8006382  | 28.64023781 | 28.68291092 |
| 22.02276039 | 21.93581772 | 21.76263428 | 22.58566093 |
| 27.87660217 | 27.68598938 | 27.63733864 | 27.62449837 |
| 27.2652607  | 27.13721466 | 27.21261787 | 27.23242378 |
| 24.29424858 | 24.67745209 | 20.61432457 | 23.37238884 |
| 25.76258469 | 25.5970459  | 25.51177406 | 25.74855232 |
| 22.27255821 | 22.67104912 | 22.21903992 | 22.34350967 |
| 21.33352661 | 22.21118927 | 19.92749977 | 21.15616417 |
| 20.37634087 | 20.51281738 | 21.43501854 | 21.0283699  |
| 20.39881897 | 21.19604492 | 20.47196388 | 21.18020248 |
| 27.96455193 | 28.07091522 | 29.26657867 | 27.85869408 |
| 24.63931465 | 24.55713081 | 24.45863914 | 24.26763725 |
| 25.34884644 | 24.81406403 | 25.29582596 | 24.67481422 |

|             |             |             |             |
|-------------|-------------|-------------|-------------|
| 29.44687462 | 29.15126991 | 29.20669174 | 29.25169182 |
| 25.77429581 | 25.74031448 | 25.87415314 | 25.41882896 |
| 23.3089695  | 23.99394989 | 24.20888329 | 23.89901352 |
| 22.10632706 | 22.50457954 | 22.40960884 | 21.30628395 |
| 19.33066559 | 22.44288445 | 21.98314857 | 22.23829651 |
| 22.6465168  | 22.35579109 | 22.95397186 | 21.86170006 |
| 20.5561657  | 22.18289375 | 21.92763138 | 21.98426247 |
| 24.18601227 | 25.1064949  | 24.32793427 | 23.82405663 |
| 24.37112617 | 24.6320076  | 23.75185013 | 24.29705048 |
| 24.84009361 | 25.52061272 | 25.43408966 | 23.55952644 |
| 20.98294067 | 22.60988808 | 21.9372921  | 19.81743622 |
| 27.95221519 | 28.2408638  | 28.11431122 | 27.93162537 |
| 27.13398552 | 27.42350197 | 27.40446281 | 27.228302   |
| 26.48265457 | 26.97366524 | 26.90184784 | 26.86561394 |
| 27.40811157 | 27.7723465  | 27.74477196 | 27.63982391 |
| 26.82335281 | 27.23068428 | 27.24825668 | 27.01722717 |
| 26.76597595 | 26.67060661 | 26.72832298 | 26.77994156 |
| 26.25943565 | 26.58734894 | 26.06056213 | 26.65703773 |
| 25.77622986 | 24.81728935 | 24.14709091 | 24.72998238 |
| 22.45078278 | 22.13210487 | 22.84900093 | 21.8631382  |
| 26.27701759 | 25.58960915 | 25.5723629  | 25.48812103 |
| 23.51641083 | 23.502882   | 23.40574455 | 23.94922256 |
| 24.81122589 | 24.57392311 | 24.7957058  | 24.69805717 |
| 26.82723427 | 26.83303833 | 27.16230965 | 26.67060661 |
| 19.66143608 | 22.26728058 | 21.88241005 | 20.93733978 |
| 24.3471241  | 24.63566589 | 24.3924427  | 24.64982033 |
| 28.17126274 | 28.31678391 | 27.9020195  | 27.97421265 |
| 26.23357773 | 26.83821869 | 26.90104103 | 26.72090721 |
| 24.70160484 | 24.8560009  | 24.73551941 | 24.75938797 |
| 19.85044289 | 20.30084038 | 19.65219688 | 20.67839813 |
| 24.64135551 | 24.83209801 | 24.60918999 | 24.52312851 |
| 27.41981125 | 27.38393402 | 27.23361397 | 27.42630386 |
| 23.92533302 | 24.34251976 | 23.94225883 | 24.20925522 |
| 21.34277725 | 21.35412407 | 20.98356628 | 21.6462326  |
| 19.76639175 | 20.13156319 | 21.07672501 | 22.52250671 |
| 21.48772812 | 21.67081261 | 19.65918922 | 21.65394783 |
| 21.84521484 | 22.37872505 | 22.18131256 | 20.84009552 |
| 23.52516174 | 24.13210487 | 24.47704315 | 24.23987198 |
| 23.47741318 | 23.53824806 | 23.09445572 | 23.51496696 |
| 24.85405159 | 24.53777313 | 24.56569672 | 24.4639473  |
| 27.66756439 | 27.38615608 | 27.76357269 | 27.86307526 |

|             |             |             |             |
|-------------|-------------|-------------|-------------|
| 28.59693909 | 28.19835472 | 29.3358593  | 28.88631821 |
| 24.26870918 | 24.43720627 | 24.38225174 | 25.41564178 |
| 24.62772942 | 20.25868416 | 22.65569496 | 21.84643936 |
| 27.75015068 | 27.80384254 | 27.93769836 | 27.64766693 |
| 23.5716114  | 23.52193069 | 22.72165298 | 23.15377045 |
| 29.47645569 | 29.42271996 | 29.43987846 | 29.39040565 |
| 25.32416153 | 25.33582497 | 25.52345657 | 25.40304947 |
| 23.88352966 | 23.49753189 | 20.93762779 | 23.57865334 |
| 23.06188965 | 23.02086258 | 23.40652466 | 24.06035614 |
| 22.46288681 | 22.71985817 | 21.8392868  | 19.91030312 |
| 23.31257439 | 23.4913044  | 23.75276947 | 22.94899178 |
| 21.60014153 | 22.6808033  | 21.60154724 | 21.32141113 |
| 23.30270958 | 21.87680244 | 22.1558876  | 20.76772308 |
| 24.85761452 | 24.69322586 | 25.39528847 | 24.81156921 |
| 30.81604385 | 30.80585861 | 30.72183609 | 30.64658737 |
| 27.77052116 | 25.2621994  | 29.89074516 | 26.0720005  |
| 23.40730286 | 23.9731617  | 23.94529915 | 24.61026001 |
| 19.92753029 | 21.49462128 | 22.80616951 | 22.50642014 |
| 19.51797676 | 22.07077599 | 20.23880577 | 21.96273613 |
| 25.71897507 | 25.12506485 | 24.83605194 | 24.78111839 |
| 26.62449837 | 26.94022179 | 26.68899155 | 26.9392128  |
| 27.98527718 | 28.15243149 | 28.06937981 | 27.99830437 |
| 20.47842598 | 21.40877914 | 20.71716118 | 21.49760437 |
| 21.52716827 | 22.39848328 | 22.11955833 | 22.38292503 |
| 23.50227356 | 21.25653076 | 23.21448326 | 23.2731266  |
| 30.66237831 | 30.82744598 | 30.65761566 | 30.74069405 |
| 26.95482445 | 26.43745995 | 26.97901917 | 26.93202019 |
| 25.0875206  | 25.09277153 | 25.79540825 | 25.04531097 |
| 28.29395103 | 28.29048347 | 27.60886574 | 27.64691353 |
| 24.36859703 | 25.11119843 | 25.12734985 | 25.185709   |
| 24.20254517 | 24.60755348 | 24.08342743 | 24.03111649 |
| 26.09208488 | 25.87741089 | 25.67317009 | 25.73000717 |
| 28.38067627 | 28.88588142 | 28.42278099 | 28.26552963 |
| 26.29205513 | 22.65447235 | 22.34285927 | 23.97744751 |
| 22.93136978 | 22.05225182 | 22.00343513 | 21.99624443 |
| 20.60839462 | 22.62354851 | 20.66417503 | 22.54587746 |
| 22.2907238  | 22.13216782 | 22.46109009 | 22.7580452  |
| 22.75857544 | 22.59684753 | 22.96280479 | 21.7477169  |
| 22.76439857 | 24.02445221 | 20.53953552 | 23.49374962 |
| 33.99201202 | 33.73034286 | 33.66670227 | 33.5112381  |
| 33.55750656 | 32.61324692 | 32.8741188  | 32.86494446 |

|             |             |             |             |
|-------------|-------------|-------------|-------------|
| 31.33410072 | 30.87957001 | 30.67227745 | 30.61131287 |
| 27.10819054 | 26.12980652 | 26.87806511 | 27.38944244 |
| 30.88939667 | 31.00142097 | 30.73303413 | 30.86452103 |
| 30.69062424 | 30.57650566 | 30.4682045  | 30.51512146 |
| 21.25093269 | 24.78461647 | 23.43783951 | 21.20578575 |
| 28.27377701 | 28.31272125 | 27.88878632 | 27.77762222 |
| 27.92133141 | 27.89827538 | 27.73666763 | 27.63754654 |
| 26.13709831 | 26.03370094 | 25.82245255 | 25.79503632 |
| 24.83788109 | 23.27611351 | 23.35124207 | 22.72847748 |
| 23.00269699 | 22.64577103 | 22.94483376 | 23.0180645  |
| 21.06486893 | 21.28883934 | 21.69011497 | 21.81331062 |
| 23.62433052 | 24.17561913 | 23.48234558 | 23.60195541 |
| 24.2657795  | 24.72614098 | 24.66752434 | 24.33039856 |
| 21.91444397 | 22.33112335 | 19.18474197 | 22.10671043 |
| 26.72468376 | 27.05569077 | 26.78069305 | 26.91570282 |
| 25.9023304  | 26.18124199 | 26.47407341 | 26.24927139 |
| 24.12699509 | 23.9392128  | 24.29949951 | 23.96208191 |
| 24.87121773 | 24.99191856 | 25.07618523 | 24.97324944 |
| 26.1654377  | 26.74149704 | 26.61371994 | 26.47504807 |
| 20.48677254 | 20.95723724 | 19.54231834 | 22.58772087 |
| 25.94091606 | 25.82422638 | 25.85098076 | 25.97471619 |
| 25.16015625 | 25.40288544 | 25.15379333 | 25.24445152 |
| 23.91415215 | 24.10940742 | 23.66579056 | 24.29508972 |
| 23.93292046 | 24.28982353 | 23.96947861 | 24.34543419 |
| 22.64337158 | 20.740242   | 20.28617287 | 18.96962929 |
| 23.25767517 | 23.7470417  | 23.81880188 | 23.99118423 |
| 23.15807724 | 23.1516037  | 22.62823105 | 22.7059021  |
| 21.34564972 | 21.55215454 | 21.92784882 | 21.84314537 |
| 22.62003899 | 23.45713615 | 24.2315464  | 23.06284523 |
| 23.65643692 | 23.82551384 | 24.83610153 | 24.10101318 |
| 22.69176865 | 22.40979004 | 22.23327255 | 22.69108582 |
| 25.41193008 | 25.53011322 | 25.54754448 | 25.56278992 |
| 28.06460762 | 28.07030106 | 28.04280853 | 28.05305099 |
| 20.93329811 | 21.08569717 | 20.91269112 | 21.94845772 |
| 26.84864235 | 26.26036835 | 27.52050781 | 26.52348709 |
| 28.38018036 | 28.17636108 | 29.33108139 | 28.21247864 |
| 26.32051659 | 25.32988548 | 26.44863892 | 25.32381821 |
| 27.66722679 | 27.71338654 | 28.84311104 | 27.96002769 |
| 27.39050865 | 26.74342537 | 27.97180367 | 26.68431664 |
| 26.1315155  | 25.28520966 | 26.46734238 | 25.4086628  |
| 24.97026825 | 24.00358772 | 26.83062363 | 24.81782532 |

|             |             |             |             |
|-------------|-------------|-------------|-------------|
| 25.29852104 | 24.34719276 | 25.23019028 | 24.70065308 |
| 23.62900925 | 23.74960136 | 24.77243423 | 23.99049187 |
| 26.19754982 | 26.03797913 | 25.82050705 | 25.8752327  |
| 28.38484001 | 28.16916084 | 27.7972393  | 27.77730942 |
| 23.62800789 | 23.68217468 | 23.60116196 | 24.03942299 |
| 26.49629784 | 26.65594673 | 26.54730797 | 26.65253067 |
| 22.69095802 | 22.81983376 | 22.33172417 | 23.05495262 |
| 25.95568848 | 26.47226143 | 26.20362854 | 26.85982132 |
| 20.93890762 | 21.16894913 | 20.70859528 | 20.31395531 |
| 20.1331501  | 22.48895454 | 22.23937607 | 22.12151909 |
| 23.86994934 | 24.5912075  | 24.24459648 | 24.45901489 |
| 25.09317398 | 25.51111031 | 25.13907051 | 25.18040657 |
| 23.69444847 | 23.81019592 | 23.57519341 | 24.12226295 |
| 24.31195259 | 24.50039101 | 23.93840599 | 24.85095596 |
| 23.82900238 | 23.60048103 | 25.50263786 | 24.28841591 |
| 25.36208725 | 25.23538589 | 26.80550385 | 25.86580276 |
| 22.94229507 | 23.14066315 | 23.88734627 | 21.38968849 |
| 24.65719986 | 24.54986572 | 25.3492527  | 24.80301857 |
| 20.7519722  | 21.32201576 | 20.19048119 | 21.06879997 |
| 29.97514343 | 30.23043251 | 29.88537216 | 29.458498   |
| 29.78721619 | 29.52837372 | 29.55771637 | 29.56734085 |
| 24.99899292 | 25.20213509 | 25.14678192 | 25.16917038 |
| 23.18808174 | 23.23444366 | 23.20715714 | 23.28742981 |
| 25.97830009 | 25.57842255 | 25.66158295 | 25.46538162 |
| 24.52981377 | 25.04938889 | 24.78201866 | 25.26895905 |
| 23.35769844 | 23.52671432 | 23.31492805 | 22.75952911 |
| 29.56136322 | 29.52950859 | 30.39703369 | 29.5480442  |
| 25.54657364 | 25.48686409 | 25.63969994 | 25.73301125 |
| 27.28938484 | 27.60059547 | 27.57629013 | 27.69072533 |
| 18.94221497 | 23.10181427 | 23.58439827 | 20.17101479 |
| 22.28087807 | 20.39894485 | 21.98287201 | 22.86921501 |
| 25.16989708 | 25.0641861  | 25.02144814 | 24.88049698 |
| 23.08224106 | 23.91643143 | 23.72650337 | 23.26356125 |
| 30.09521866 | 29.52872658 | 29.65592957 | 29.52067566 |
| 29.73670006 | 29.25505066 | 29.22458076 | 29.09743118 |
| 19.01150513 | 24.2896843  | 23.67594528 | 22.31254768 |
| 25.15460396 | 25.55520058 | 25.52172089 | 25.50102997 |
| 22.7917366  | 23.47938919 | 22.49814034 | 22.94583511 |
| 24.87211037 | 25.35140991 | 24.98776245 | 25.33340454 |
| 22.46129036 | 20.39266586 | 22.20505524 | 19.66051674 |
| 26.49417686 | 26.74560547 | 26.15977097 | 26.31554985 |

|             |             |             |             |
|-------------|-------------|-------------|-------------|
| 22.32865906 | 22.84350967 | 22.8281498  | 22.81381989 |
| 20.26045799 | 22.62604713 | 23.15290451 | 22.15697289 |
| 23.39047623 | 24.0543232  | 24.15784645 | 23.87773705 |
| 26.05372429 | 26.51550865 | 25.5339489  | 26.34996033 |
| 20.19823837 | 21.29759789 | 21.08420563 | 21.2170887  |
| 25.10904884 | 25.06459808 | 24.6753521  | 24.68463898 |
| 25.80999947 | 25.23917961 | 25.62505531 | 25.64336586 |
| 27.48423767 | 27.70497131 | 28.02157593 | 27.66621017 |
| 24.52085304 | 24.46369934 | 24.46294975 | 24.27859688 |
| 24.80774117 | 23.93102837 | 24.45387459 | 24.09393883 |
| 22.9061718  | 23.07918549 | 21.81604958 | 23.08687973 |
| 22.31409836 | 22.20794678 | 22.34602928 | 23.41325569 |
| 22.44611931 | 22.72415352 | 22.67022896 | 23.10181427 |
| 22.32726288 | 22.70821953 | 22.23771477 | 22.5212841  |
| 21.80754471 | 23.8314209  | 22.73516846 | 22.15903282 |
| 25.78469086 | 26.15137672 | 25.95805931 | 26.00966644 |
| 21.26802254 | 21.40945244 | 21.08660507 | 21.67232323 |
| 23.01115227 | 23.25522614 | 23.35164642 | 22.04069519 |
| 25.05063438 | 24.69906425 | 25.50993347 | 25.39191818 |
| 23.98754501 | 23.49032593 | 23.1720047  | 23.08938789 |
| 23.76121521 | 24.39466858 | 23.82473755 | 22.87314415 |
| 30.17925835 | 30.10299492 | 29.93915749 | 29.87522697 |
| 22.34529877 | 23.60715866 | 23.1965847  | 23.36332512 |
| 26.88820648 | 26.71881866 | 27.72299194 | 26.92263603 |
| 26.77140236 | 26.64044571 | 27.37534142 | 26.54554176 |
| 25.98048019 | 26.46766853 | 26.10824966 | 26.21267319 |
| 24.56523132 | 24.50445747 | 24.28785324 | 25.26441956 |
| 23.2637043  | 23.73541641 | 23.38337326 | 23.84469795 |
| 20.51758957 | 20.63307381 | 20.64912987 | 21.02177811 |
| 21.45568275 | 21.33226967 | 21.25660896 | 21.22564507 |
| 27.36594582 | 27.69584274 | 27.84625244 | 27.39100075 |
| 21.87023163 | 21.7474308  | 21.79594231 | 23.58221817 |
| 22.45010376 | 22.48042488 | 22.67588043 | 22.51862144 |
| 26.52747536 | 26.44833946 | 26.21648979 | 25.9982605  |
| 26.39247513 | 26.61610603 | 26.28556252 | 26.42660904 |
| 21.9349575  | 22.31370926 | 22.20967293 | 20.94915771 |
| 27.49708939 | 26.97607231 | 26.79352379 | 26.80833054 |
| 25.73383904 | 25.14262009 | 24.89536667 | 24.9086647  |
| 26.2405262  | 25.95951843 | 26.61876869 | 25.97554779 |
| 32.75258636 | 32.90655518 | 32.56787491 | 32.59428024 |
| 22.63949013 | 24.19392586 | 24.1791172  | 24.36833    |

|             |             |             |             |
|-------------|-------------|-------------|-------------|
| 26.18029404 | 26.0474968  | 25.61487198 | 25.72119331 |
| 26.89295959 | 26.3788166  | 26.33703423 | 26.49800301 |
| 22.11047363 | 22.3066349  | 19.48988724 | 21.05130196 |
| 19.91127205 | 21.09892654 | 21.41335487 | 21.20012283 |
| 26.68525314 | 26.99183273 | 26.65608215 | 26.5101757  |
| 25.23979759 | 25.41931152 | 25.14417648 | 25.11632538 |
| 20.32259941 | 20.14757919 | 20.16570282 | 20.89141273 |
| 26.96807098 | 27.30094719 | 26.89388657 | 26.95249367 |
| 23.2123909  | 23.8630619  | 24.00718689 | 23.74663162 |
| 27.1340847  | 26.91809273 | 27.15112495 | 26.99269676 |
| 26.49845886 | 26.83328056 | 26.5610714  | 26.9082756  |
| 24.37012672 | 24.35178185 | 24.66242599 | 24.70033455 |
| 22.38041687 | 23.12842751 | 22.47951126 | 20.2995739  |
| 22.30563354 | 22.50268745 | 22.14080429 | 22.24617767 |
| 27.0413475  | 27.24209023 | 27.34036446 | 27.28674316 |
| 27.0377903  | 27.31613731 | 27.13447571 | 27.24018097 |
| 23.52921867 | 24.14623833 | 24.23139954 | 24.0907135  |
| 24.88943672 | 25.33640289 | 25.14623833 | 24.7136097  |
| 26.85638046 | 27.24572182 | 27.04364395 | 26.94391441 |
| 26.58132744 | 27.26981544 | 19.8731823  | 20.78365707 |
| 22.53205299 | 23.14510155 | 22.6770649  | 22.64394379 |
| 28.08542442 | 28.160532   | 28.70493889 | 27.94898987 |
| 23.54380226 | 24.57213211 | 24.95171547 | 24.69067192 |
| 23.04438591 | 23.0836544  | 23.13417435 | 23.13243294 |
| 24.73799515 | 24.30375481 | 24.80818367 | 24.60574722 |
| 24.00573158 | 24.39754295 | 24.19527817 | 24.53267097 |
| 21.65442848 | 21.91411591 | 22.40384865 | 21.61222267 |
| 23.60648155 | 23.97578812 | 23.94681549 | 23.90223885 |
| 20.24376869 | 20.28624725 | 20.41028214 | 19.64713669 |
| 26.58233261 | 26.75110817 | 26.93100548 | 26.72871208 |
| 22.31581116 | 22.05311394 | 22.55189705 | 22.88351059 |
| 22.14416885 | 22.72737694 | 22.59907532 | 22.28059387 |
| 28.31471062 | 28.04588318 | 29.03154755 | 28.27475357 |
| 27.8294754  | 27.8993721  | 28.62592697 | 27.88430977 |
| 27.44939613 | 27.1498661  | 28.17702675 | 27.15624619 |
| 29.75903893 | 29.91213608 | 29.89203453 | 29.87252808 |
| 23.08432007 | 24.04759979 | 23.24058533 | 23.57392311 |
| 23.49179459 | 23.67981529 | 23.15800095 | 23.72806168 |
| 23.84823608 | 24.1791172  | 23.98172188 | 24.15019417 |
| 19.3044014  | 22.81794357 | 23.66698265 | 23.53076744 |
| 25.63286781 | 26.34997749 | 25.75824356 | 25.80407715 |

|             |             |             |             |
|-------------|-------------|-------------|-------------|
| 23.22169876 | 22.53131485 | 22.58845329 | 23.02813339 |
| 22.95102119 | 23.87549019 | 23.18780899 | 23.35997963 |
| 22.52056503 | 23.17032433 | 23.04901505 | 23.24301338 |
| 22.09690094 | 21.61764336 | 21.2924633  | 22.30888748 |
| 26.69935608 | 26.90011978 | 26.90701485 | 26.99042702 |
| 26.3803215  | 26.65799141 | 26.4472847  | 26.49955559 |
| 22.90370941 | 23.89328384 | 23.21403885 | 23.94190025 |
| 28.52028275 | 28.78125572 | 28.69849586 | 28.54318428 |
| 24.37185669 | 24.48726273 | 24.11052132 | 24.31354332 |
| 21.69102287 | 22.27534676 | 22.20350266 | 21.52109146 |
| 25.97156143 | 26.70292664 | 26.67613411 | 26.73995399 |
| 29.69701958 | 29.44886398 | 29.37343407 | 29.58709908 |
| 20.65883636 | 21.45322227 | 21.78008652 | 20.0307579  |
| 21.24237442 | 21.62359428 | 19.70240974 | 22.04360199 |
| 30.98739243 | 31.31202888 | 31.39053917 | 31.16392899 |
| 21.81499481 | 22.18156052 | 21.39712524 | 21.11821556 |
| 26.78593826 | 26.89214897 | 26.85281372 | 26.48779869 |
| 28.59565926 | 28.37898254 | 28.30125237 | 28.34781647 |
| 25.79153824 | 25.67895508 | 25.82267189 | 25.84194183 |
| 29.71925926 | 29.94307518 | 29.70219994 | 29.86231995 |
| 23.59240532 | 24.24590302 | 24.0845623  | 24.22390938 |
| 25.29403877 | 25.46877098 | 25.29645538 | 25.35144424 |
| 27.69032478 | 27.62651825 | 27.65006638 | 27.58548927 |
| 25.47128487 | 25.13606071 | 24.78516579 | 25.00135612 |
| 21.90873909 | 22.20904732 | 22.22013474 | 21.62479973 |
| 23.67281914 | 23.18330193 | 20.47445488 | 23.43987083 |
| 25.33395004 | 25.43033028 | 26.18465042 | 25.28947258 |
| 20.17267609 | 20.60928726 | 19.69312096 | 20.08336067 |
| 27.53400803 | 27.58125496 | 28.19605827 | 27.59889221 |
| 27.66580391 | 27.06054306 | 28.05470657 | 27.55566978 |
| 24.20291901 | 24.06972694 | 24.21393394 | 23.90168571 |
| 25.00573158 | 25.26860237 | 24.95743942 | 25.40973091 |
| 21.28957176 | 20.66535759 | 21.44500923 | 21.59750748 |
| 31.27358818 | 31.39079475 | 31.20472336 | 31.14363861 |
| 26.62895393 | 26.56706238 | 26.54754448 | 26.35169792 |
| 26.60342789 | 25.92727852 | 25.78643608 | 25.86431503 |
| 21.83995819 | 21.92694473 | 21.60842323 | 22.06463814 |
| 27.47560501 | 27.57463074 | 27.59789848 | 27.54863167 |
| 29.62528229 | 29.92478943 | 29.82012939 | 29.91399193 |
| 27.68772507 | 28.2556591  | 28.01126671 | 28.32392883 |
| 27.01073265 | 27.23480225 | 27.15180206 | 27.1964798  |



|             |             |             |             |
|-------------|-------------|-------------|-------------|
| 23.84095764 | 24.03431129 | 23.93615913 | 23.59809875 |
| 22.72665024 | 23.31686211 | 22.8556881  | 22.97701073 |
| 23.93526077 | 24.31955147 | 24.17554283 | 24.5217514  |
| 24.79738808 | 23.84239769 | 24.11290932 | 24.66519356 |
| 23.03543472 | 23.23796272 | 23.01447487 | 23.39767265 |
| 28.0376339  | 27.84463692 | 27.48169899 | 27.50967789 |
| 31.78433228 | 32.13332367 | 31.940382   | 31.90795326 |
| 22.56153107 | 21.90884781 | 21.28417969 | 22.20323372 |
| 28.42977905 | 28.18881416 | 28.35812759 | 28.30513    |
| 24.49252892 | 24.77660751 | 24.66876793 | 24.22780609 |
| 24.26241302 | 24.8385067  | 24.50379181 | 24.72806168 |
| 26.359375   | 26.55632782 | 26.49908447 | 26.37856865 |
| 24.16530418 | 24.08358955 | 23.93364143 | 23.97997856 |
| 24.30813599 | 24.96252251 | 25.03136826 | 24.71481514 |
| 24.08115387 | 24.1964798  | 24.36899567 | 24.08432007 |
| 23.90793228 | 24.03279877 | 24.67459869 | 23.86834717 |
| 25.42940521 | 26.14108086 | 26.27399826 | 26.3571949  |
| 23.22745323 | 23.13824272 | 23.13978958 | 20.06222534 |
| 21.50884438 | 22.92869759 | 22.59634781 | 22.77253532 |
| 23.13238716 | 23.67594528 | 23.39401436 | 23.57991982 |
| 23.08687973 | 23.71983719 | 23.53136253 | 23.52516174 |
| 24.43096733 | 24.58204651 | 24.10573578 | 24.49124336 |
| 27.68985748 | 27.57780266 | 27.72195053 | 27.53615952 |
| 24.49167252 | 24.29775047 | 23.95916557 | 24.35823631 |
| 24.86207008 | 25.61397362 | 25.72093201 | 25.45588303 |
| 24.58743477 | 24.28086281 | 24.42713547 | 25.45851326 |
| 23.38679695 | 23.51965332 | 22.74396324 | 23.27241516 |
| 23.49850464 | 24.59097862 | 24.18729591 | 24.72665977 |
| 24.15668869 | 24.28855705 | 24.12384224 | 23.07747459 |
| 25.43914032 | 25.75758362 | 25.62226486 | 25.66587257 |
| 24.72192383 | 24.92700768 | 24.57409668 | 24.51586914 |
| 27.32276917 | 27.24590302 | 27.25178337 | 27.39149284 |
| 25.04992867 | 25.39718437 | 23.91378593 | 24.70777702 |
| 24.64938164 | 25.67422104 | 25.0043602  | 24.99036217 |
| 23.57922935 | 24.16054153 | 23.71334839 | 23.27838326 |
| 22.71531868 | 22.59361458 | 21.36003304 | 22.76783562 |
| 25.57669449 | 26.30467796 | 25.5114727  | 26.48502159 |
| 26.67101097 | 26.51442528 | 26.66938972 | 26.62825775 |
| 27.21752548 | 27.35296059 | 27.56201744 | 27.17769241 |
| 26.98043633 | 27.0964756  | 26.85982132 | 26.82699203 |
| 29.86008644 | 29.43916512 | 29.84507179 | 29.75460052 |

|             |             |             |             |
|-------------|-------------|-------------|-------------|
| 23.37105942 | 22.77812195 | 21.81426048 | 21.49785042 |
| 25.070261   | 20.90295792 | 27.08324432 | 23.67098427 |
| 23.71408272 | 23.92043495 | 23.2014389  | 21.34878349 |
| 23.66123009 | 23.42111206 | 23.99817467 | 23.29473877 |
| 25.03464699 | 24.87295723 | 24.81112671 | 25.31084251 |
| 20.91334724 | 21.65796471 | 21.16815376 | 21.70927238 |
| 27.1572094  | 27.15913582 | 27.09093475 | 26.9613533  |
| 29.2728653  | 29.54602051 | 29.18959236 | 29.31287384 |
| 24.08082771 | 23.74960136 | 23.46973419 | 23.44543839 |
| 25.82648277 | 25.20646477 | 25.24466896 | 25.07361412 |
| 28.70365143 | 28.82914162 | 28.78923798 | 28.76667213 |
| 23.99593353 | 24.45255661 | 25.36128426 | 24.98093796 |
| 22.52573395 | 22.62571335 | 22.05453873 | 21.96321106 |
| 21.30826569 | 22.80029488 | 22.55292892 | 22.4506073  |
| 22.91571999 | 22.1515274  | 22.90600586 | 20.51412201 |
| 26.29747009 | 26.45062256 | 26.32806969 | 26.49806404 |
| 19.48567963 | 22.57694817 | 22.98356628 | 22.45447731 |
| 21.91561127 | 21.84766388 | 21.67697716 | 20.10771179 |
| 23.01263618 | 22.98459244 | 22.90864754 | 22.6205101  |
| 20.67831039 | 20.97987366 | 21.99316025 | 21.13144493 |
| 25.11810875 | 25.52942657 | 25.16157913 | 25.54197311 |
| 24.91879845 | 24.86693382 | 24.68634987 | 24.93611526 |
| 25.66158295 | 25.64141083 | 25.37404823 | 25.47676468 |
| 28.08090973 | 28.20862389 | 28.05945969 | 28.00704765 |
| 28.73911667 | 29.08029938 | 28.80042267 | 28.92167282 |
| 23.43122292 | 21.09537506 | 21.0250473  | 23.75552177 |
| 29.45142174 | 29.13030815 | 30.27041626 | 29.41369057 |
| 28.14676094 | 27.68378258 | 28.70150566 | 27.74931908 |
| 26.18292809 | 25.80587387 | 26.78394127 | 26.03393364 |
| 25.69808388 | 25.48588181 | 25.45935822 | 25.49670792 |
| 20.78148842 | 21.80262375 | 21.22103691 | 19.48893929 |
| 22.85760689 | 23.41183281 | 23.22231674 | 23.57588577 |
| 26.87161827 | 26.90873337 | 27.06855965 | 27.07081223 |
| 25.77766037 | 25.6905117  | 25.61812592 | 25.57265282 |
| 25.60209656 | 24.03850365 | 25.53433418 | 24.36693001 |
| 28.04369545 | 27.43380356 | 28.32658768 | 28.18758774 |
| 22.55365562 | 22.91511917 | 22.70777702 | 22.85256767 |
| 25.96210289 | 26.51083946 | 26.04528999 | 26.29498482 |
| 23.94252777 | 23.69402313 | 23.99550247 | 23.28390312 |
| 22.35129547 | 22.87166023 | 19.17520523 | 23.18930244 |
| 27.56361771 | 27.80790138 | 27.50892258 | 27.66492271 |

|             |             |             |             |
|-------------|-------------|-------------|-------------|
| 24.40301704 | 24.5637207  | 24.6223774  | 24.80523491 |
| 24.10517502 | 24.2347641  | 24.0743084  | 24.1906147  |
| 21.08206367 | 19.72555542 | 20.76821899 | 20.87530327 |
| 23.28813553 | 22.23526192 | 22.59641457 | 22.90600586 |
| 26.20052719 | 25.79810524 | 25.93597984 | 26.17771149 |
| 20.70910454 | 21.200243   | 21.01062965 | 22.06236839 |
| 19.79225349 | 19.83535957 | 23.18805122 | 20.51297379 |
| 24.65025902 | 25.33251572 | 25.09723854 | 25.04013443 |
| 24.54433441 | 24.86665154 | 24.25284767 | 24.83504105 |
| 29.89569283 | 29.21660042 | 30.19389915 | 30.27119637 |
| 25.19279861 | 25.63433647 | 25.656847   | 25.93901062 |
| 24.56150818 | 25.36158562 | 25.16384506 | 24.93710327 |
| 30.12989044 | 30.37916756 | 30.15520859 | 30.12398529 |
| 23.61930084 | 23.22865677 | 22.99814034 | 23.75144196 |
| 23.59194946 | 23.50554848 | 23.23915672 | 23.31782722 |
| 26.81164169 | 26.33379555 | 26.14139175 | 26.49472618 |
| 32.48529434 | 32.74131775 | 32.56354141 | 32.57025146 |
| 33.2871933  | 33.14068604 | 33.26024246 | 33.09033585 |
| 24.03002167 | 24.94663811 | 24.81919098 | 24.58319473 |
| 23.07143021 | 23.12576675 | 22.30056    | 22.38540268 |
| 22.16692734 | 23.05928421 | 22.39322853 | 20.54687309 |
| 21.24341583 | 19.4525795  | 22.03173637 | 21.52363014 |
| 23.85148048 | 20.66059875 | 23.30730247 | 22.75080681 |
| 22.13705444 | 22.23233604 | 22.26816559 | 22.11597633 |
| 22.4930172  | 22.39139366 | 22.17529869 | 22.16665268 |
| 23.20188904 | 21.25363159 | 23.45425224 | 23.26083565 |
| 22.12420464 | 22.42188263 | 21.98541069 | 21.83174896 |
| 29.40764618 | 29.32984161 | 28.69912338 | 29.54117203 |
| 30.22008896 | 30.23386574 | 29.44353867 | 30.28967094 |
| 23.27639771 | 23.22801208 | 22.52824211 | 23.64152145 |
| 30.45356178 | 30.46684456 | 29.84438324 | 30.77784157 |
| 21.08769035 | 21.01114845 | 22.39649773 | 22.31774521 |
| 28.17059326 | 28.26914597 | 28.9626503  | 28.02733421 |
| 29.86373901 | 29.83567619 | 29.96389008 | 29.77319527 |
| 24.83171082 | 24.18298531 | 24.28164101 | 23.69996452 |
| 25.6885643  | 25.9819622  | 25.64438438 | 25.56305122 |
| 26.56929398 | 26.62797928 | 26.4659729  | 26.55980301 |
| 24.49429893 | 24.0871563  | 23.8038063  | 23.6227684  |
| 23.92116165 | 23.9842453  | 24.11346626 | 23.87117195 |
| 22.78426743 | 20.25644302 | 23.52456284 | 20.41371918 |
| 24.86448097 | 24.55631256 | 24.31513405 | 24.24814796 |

|             |             |             |             |
|-------------|-------------|-------------|-------------|
| 23.63765717 | 23.16948318 | 23.47654915 | 24.20120049 |
| 26.8646698  | 27.21261787 | 26.77793694 | 27.1096859  |
| 35.02461624 | 34.908535   | 34.82012177 | 34.79764175 |
| 27.71757698 | 28.03107452 | 27.52499771 | 27.49029541 |
| 25.062994   | 25.39643288 | 25.08990479 | 24.93620491 |
| 25.78049278 | 25.77140236 | 25.4376812  | 25.23374176 |
| 23.07744217 | 22.70782089 | 20.36300659 | 22.46856689 |
| 26.83677483 | 27.11941528 | 27.02411461 | 27.12543869 |
| 30.32806587 | 30.47933006 | 30.51258087 | 30.48481369 |
| 21.35584641 | 24.00795746 | 24.17004967 | 24.66231728 |
| 26.74624634 | 27.46138954 | 26.93887711 | 26.83364296 |
| 21.27099037 | 20.88653946 | 20.90903091 | 21.27980042 |
| 31.93287086 | 32.03829575 | 31.56760406 | 31.67850304 |
| 20.43245888 | 23.59194946 | 23.2187748  | 23.50130272 |
| 23.10245514 | 21.98475266 | 23.47827721 | 19.27838707 |
| 19.29154205 | 27.27692986 | 25.00358772 | 26.26970863 |
| 23.6408596  | 23.50567055 | 23.45538139 | 23.2166748  |
| 27.0163765  | 27.07500267 | 27.20759964 | 26.91433334 |
| 20.66966629 | 20.43635941 | 21.08166885 | 22.93441582 |
| 24.68971252 | 24.24575806 | 24.79188538 | 24.24219894 |
| 23.32058525 | 24.12478828 | 23.13728905 | 23.53635216 |
| 25.0845623  | 25.5705986  | 25.49384117 | 25.5112915  |
| 23.23656082 | 23.39675903 | 19.88481712 | 20.7010498  |
| 26.21487999 | 26.58663368 | 26.38365364 | 26.58075333 |
| 22.86581993 | 22.96084404 | 21.66205597 | 22.24388504 |
| 20.35250854 | 19.59352875 | 19.04683113 | 21.21210861 |
| 20.41833496 | 21.10929489 | 20.32058525 | 21.19044876 |
| 25.12194633 | 25.88187408 | 24.89661407 | 25.32254601 |
| 22.41789627 | 22.91451645 | 22.65737534 | 23.22798157 |
| 24.01384544 | 23.24250412 | 23.51665115 | 23.37491035 |
| 27.63830566 | 27.85144424 | 27.9472065  | 27.92002678 |
| 32.01561356 | 32.09461975 | 32.3167305  | 32.03606796 |
| 22.6620121  | 23.12472534 | 22.23683167 | 19.35831261 |
| 23.47184372 | 24.23994446 | 24.14289284 | 24.49381065 |
| 24.35346603 | 24.125103   | 24.72826958 | 24.24045372 |
| 23.38416481 | 23.6300087  | 23.78785706 | 23.65752792 |
| 24.00573158 | 24.62772942 | 24.1734848  | 25.05419922 |
| 28.40125084 | 27.97792816 | 28.18806076 | 28.34032249 |
| 21.49950409 | 21.94367218 | 21.55238914 | 21.77056122 |
| 20.61793518 | 22.79590416 | 19.851614   | 22.79382133 |
| 23.96895027 | 24.68869781 | 24.30570412 | 24.2896843  |

|             |             |             |             |
|-------------|-------------|-------------|-------------|
| 27.13104439 | 27.2380867  | 27.10299492 | 27.38080025 |
| 29.15356636 | 29.36189651 | 29.2132206  | 29.18749428 |
| 19.61882782 | 21.45372391 | 20.48607826 | 20.93200111 |
| 22.80011749 | 23.00278282 | 22.67219353 | 22.80626678 |
| 22.35347939 | 22.04156494 | 21.02297401 | 22.18007278 |
| 23.37451172 | 23.31534195 | 23.34800339 | 23.31091309 |
| 23.54238701 | 22.43104362 | 20.79157257 | 21.12791443 |
| 25.56040001 | 25.68546677 | 25.3972168  | 25.46101379 |
| 27.80402756 | 27.86058998 | 27.69816399 | 27.68177223 |
| 25.57383728 | 25.93309975 | 25.7634964  | 25.45676041 |
| 25.32601357 | 25.85633278 | 25.53922462 | 25.69734192 |
| 23.39047623 | 24.00940895 | 23.64262199 | 23.98554802 |
| 28.76132202 | 28.78300476 | 28.66451645 | 28.67236137 |
| 24.79406929 | 24.19992828 | 25.70809364 | 25.48499107 |
| 23.63123131 | 24.14941978 | 23.50772858 | 24.222435   |
| 23.39440536 | 24.06735039 | 23.25115776 | 21.73172569 |
| 22.94191933 | 23.33579063 | 23.18703842 | 23.28107452 |
| 24.67938614 | 24.41351318 | 24.32003403 | 24.9444046  |
| 22.91152    | 22.61658859 | 23.35474396 | 21.85316086 |
| 25.98654747 | 26.05653763 | 25.93037415 | 26.12693596 |
| 23.27469254 | 22.79253197 | 23.07326317 | 23.01646614 |
| 23.74529839 | 23.74724579 | 23.24869919 | 23.38363647 |
| 28.1725502  | 28.17697906 | 28.0412941  | 28.08947182 |
| 26.03462601 | 25.65951538 | 25.25720596 | 25.15147209 |
| 22.82524109 | 23.65774536 | 22.93651962 | 22.70153046 |
| 26.13848495 | 26.31591225 | 25.97991371 | 25.97443199 |
| 26.07832527 | 25.91447067 | 25.94366837 | 26.25794411 |
| 26.39966393 | 26.11141777 | 26.40005493 | 26.20856857 |
| 27.86655617 | 27.60448837 | 27.53526878 | 27.66499138 |
| 26.95582199 | 27.08547592 | 27.07867241 | 26.90127182 |
| 23.43758583 | 23.23185349 | 21.2732563  | 20.51054573 |
| 20.98572159 | 21.97340775 | 21.21544838 | 21.40358925 |
| 21.63962364 | 21.94059372 | 21.89840508 | 21.71933556 |
| 22.03560257 | 21.95567513 | 19.81025887 | 20.92433739 |
| 23.77001572 | 23.92352104 | 23.44430161 | 23.14239311 |
| 19.76157951 | 21.88072968 | 21.63092041 | 21.37268066 |
| 28.64388847 | 29.00372696 | 28.99191284 | 28.9842186  |
| 20.21231842 | 21.37533379 | 21.05589676 | 22.51857376 |
| 20.11005592 | 22.64884377 | 22.64165306 | 21.58001518 |
| 27.11475754 | 25.92066193 | 28.12519264 | 27.26642227 |
| 26.25069809 | 26.97059631 | 26.5909214  | 26.78867912 |

|             |             |             |             |
|-------------|-------------|-------------|-------------|
| 28.00587082 | 27.71554947 | 28.89758301 | 27.92874718 |
| 29.9878006  | 30.19295883 | 30.08777809 | 30.09307861 |
| 18.93858147 | 23.57623291 | 23.02238846 | 22.96082687 |
| 22.28976822 | 22.2510128  | 22.08825684 | 21.7897892  |
| 28.59793472 | 28.8052578  | 28.68648911 | 28.65710449 |
| 29.08840942 | 29.12314606 | 29.35541916 | 29.0731144  |
| 23.53278923 | 23.57253647 | 24.12628555 | 24.07496262 |
| 23.56045914 | 23.48787498 | 23.13749313 | 22.92116165 |
| 24.31118965 | 24.03473091 | 23.35944366 | 24.17432404 |
| 27.31553268 | 27.09224701 | 27.22038841 | 27.04541397 |
| 25.83277321 | 25.02656555 | 24.8854847  | 24.90104103 |
| 22.31724739 | 19.49758148 | 20.44172096 | 22.21611214 |
| 22.42239571 | 20.07632828 | 21.43705368 | 22.30304337 |
| 22.80053139 | 23.00063515 | 22.84045792 | 22.98506165 |
| 30.6129837  | 30.41709518 | 30.24547195 | 30.01025391 |
| 23.97596359 | 23.68013763 | 24.03707886 | 23.69029808 |
| 24.82914734 | 25.08448219 | 25.23768425 | 24.625      |
| 23.19675064 | 19.78970146 | 23.49801826 | 23.35137749 |
| 23.54450989 | 23.02179527 | 22.12905693 | 23.18572426 |
| 25.6224041  | 25.62438583 | 25.78291702 | 25.66142082 |
| 29.25460052 | 29.31533813 | 29.4424324  | 29.38683319 |
| 24.69290733 | 24.52151108 | 24.81245041 | 24.50142479 |
| 22.85709381 | 23.40600395 | 23.51074791 | 23.78875351 |
| 23.71502495 | 23.8877182  | 23.63942528 | 23.72327805 |
| 30.78892708 | 30.55444336 | 30.4900856  | 30.35247612 |
| 27.20685577 | 27.70450974 | 27.85715294 | 27.78643608 |
| 23.79857635 | 23.37822151 | 23.14631462 | 23.49826241 |
| 24.67943954 | 24.30973244 | 24.94225883 | 25.23381424 |
| 23.53433418 | 19.6835556  | 20.53162766 | 20.92331123 |
| 27.42438316 | 27.46334076 | 27.63996315 | 27.64320183 |
| 26.0275135  | 26.08338737 | 26.15555    | 26.17761612 |
| 24.00461769 | 24.24691772 | 23.96587181 | 24.25421715 |
| 23.96137428 | 23.79491234 | 23.72202873 | 22.64107895 |
| 20.9221344  | 22.56302261 | 22.84137917 | 22.29574966 |
| 28.96543121 | 28.81470108 | 28.63187027 | 28.65259933 |
| 20.91135979 | 19.84950066 | 21.75816727 | 20.05843735 |
| 25.58917999 | 25.34343529 | 25.50230408 | 25.1331234  |
| 21.09823036 | 22.92688942 | 23.08668709 | 23.00139046 |
| 23.66557312 | 22.99391556 | 24.22721863 | 23.84162903 |
| 27.47080421 | 27.28603745 | 27.58046532 | 27.50111961 |
| 28.4562664  | 28.62756157 | 28.49781227 | 28.5533638  |

|             |             |             |             |
|-------------|-------------|-------------|-------------|
| 24.63544464 | 24.21992683 | 24.39675903 | 24.12817574 |
| 31.57194901 | 31.85786438 | 32.09851456 | 32.38923264 |
| 23.83084106 | 24.52384567 | 23.72213173 | 23.91342163 |
| 28.86664581 | 28.89023781 | 30.01158714 | 29.19861221 |
| 30.18387985 | 30.05426788 | 31.08790398 | 30.21974182 |
| 29.13097191 | 28.95490646 | 30.11557579 | 29.1198597  |
| 22.68088913 | 23.25738716 | 23.17465782 | 22.82636642 |
| 23.23959351 | 22.7924118  | 22.26770973 | 22.44108772 |
| 23.24510384 | 24.37583733 | 23.75235939 | 24.04618454 |
| 23.43834877 | 24.72421646 | 21.20688057 | 24.07062912 |
| 20.12586021 | 20.81682968 | 20.61468124 | 21.12742043 |
| 34.58082581 | 34.07829666 | 34.56881714 | 34.4935112  |
| 34.77342606 | 34.18334579 | 34.75483704 | 34.60366058 |
| 26.79686928 | 24.88557816 | 25.63123131 | 25.32079124 |
| 23.08869362 | 21.82294846 | 22.38113022 | 20.45226669 |
| 23.67927742 | 24.06324005 | 24.13758659 | 23.82327843 |
| 22.51612282 | 23.28841591 | 23.79114151 | 23.34475708 |
| 24.105896   | 25.00577354 | 20.23781395 | 25.11354637 |
| 25.34590721 | 26.0011425  | 25.4418335  | 25.56598854 |
| 24.38541603 | 24.63311768 | 24.6431179  | 24.17759705 |
| 25.23052025 | 25.15247917 | 25.29031563 | 24.9858532  |
| 23.09783363 | 23.04102898 | 23.14088249 | 23.0616436  |
| 21.92940331 | 21.87567711 | 20.34770775 | 20.84494781 |
| 21.90341568 | 22.20821381 | 22.13689804 | 21.59404755 |
| 26.80538177 | 26.9690609  | 27.09908676 | 26.8052578  |
| 25.21460152 | 25.04414368 | 25.66497803 | 24.9666214  |
| 20.91320229 | 21.15090752 | 21.43344116 | 21.42167664 |
| 27.74573517 | 27.81053925 | 27.81488419 | 27.72884178 |
| 24.60506821 | 24.8080864  | 25.08885574 | 24.80134201 |
| 24.2359333  | 24.96358109 | 24.87661362 | 25.70472145 |
| 23.02845383 | 25.75597954 | 26.97803688 | 25.16710472 |
| 25.54306602 | 25.86230659 | 26.45726204 | 25.76202583 |
| 29.78512764 | 29.28056145 | 29.67347336 | 29.40098572 |
| 23.69879913 | 19.8177433  | 23.7613163  | 21.46171379 |
| 29.14727211 | 28.7380867  | 28.84717941 | 28.6092186  |
| 24.033638   | 24.86971283 | 24.59582329 | 27.64223671 |
| 32.75475693 | 32.31170654 | 32.81705475 | 32.45539856 |
| 29.76867676 | 30.01504707 | 29.83629417 | 29.63356781 |
| 32.0889473  | 32.05924225 | 32.06515884 | 32.02085495 |
| 32.48392487 | 32.91557693 | 32.97468185 | 32.67652893 |
| 23.98215675 | 24.2004528  | 23.68324661 | 23.54780769 |

|             |             |             |             |
|-------------|-------------|-------------|-------------|
| 32.90322113 | 33.24147034 | 33.03837585 | 33.48279572 |
| 28.02654266 | 28.13030815 | 27.98739243 | 28.00260162 |
| 24.98693848 | 25.01580238 | 25.95269203 | 24.78775787 |
| 22.48392105 | 22.61540031 | 23.02457047 | 22.93730927 |
| 29.33475113 | 29.40074158 | 29.56920815 | 29.38687515 |
| 23.8263855  | 21.9645462  | 25.39407921 | 24.65937996 |
| 23.1047287  | 23.64449501 | 23.71303368 | 23.16988182 |
| 23.95783806 | 23.32759094 | 22.75778198 | 23.16161728 |
| 22.59948349 | 22.35493088 | 22.54380226 | 22.61596107 |
| 22.85635185 | 23.23461914 | 22.16951752 | 21.17423248 |
| 23.16147995 | 22.24694633 | 23.43695068 | 19.96637344 |
| 21.89145088 | 22.22110748 | 22.05301476 | 21.92059898 |
| 24.71894836 | 24.98346329 | 25.17771149 | 24.7983284  |
| 28.0131855  | 27.88901901 | 28.03033829 | 27.78768349 |
| 28.31423569 | 28.19699669 | 28.19947815 | 27.89988899 |
| 26.56494141 | 26.63505745 | 26.50864983 | 26.4573555  |
| 25.23319244 | 24.524683   | 24.70044136 | 24.82919693 |
| 27.08009529 | 27.33108139 | 27.06424904 | 27.0877018  |
| 23.25623512 | 23.18460464 | 22.71473122 | 22.7835083  |
| 25.05672455 | 25.60583115 | 25.77658272 | 25.24445152 |
| 26.64855957 | 26.56674194 | 26.64182472 | 26.3898201  |
| 23.89448738 | 24.72108841 | 23.91897964 | 24.02453613 |
| 28.6048069  | 28.96567917 | 28.85370636 | 28.78322411 |
| 27.10759163 | 27.74310303 | 27.64395714 | 27.37525749 |
| 22.8244648  | 22.79651642 | 23.08526039 | 23.39728165 |
| 27.10199356 | 27.32611656 | 27.20936775 | 27.24490547 |
| 28.7206459  | 28.8967762  | 28.69288635 | 28.81897163 |
| 24.17234039 | 24.83262825 | 24.81386948 | 21.3384819  |
| 24.89407158 | 24.99114037 | 25.06755447 | 25.03825188 |
| 22.77880478 | 23.40652466 | 19.48445511 | 20.23734474 |
| 21.83313942 | 19.4183197  | 21.38120842 | 21.20323372 |
| 21.57163811 | 20.83161736 | 23.51761246 | 22.15597916 |
| 27.75919724 | 28.13525963 | 27.95726204 | 27.79240799 |
| 23.55754089 | 23.84249306 | 24.45913887 | 23.2903862  |
| 23.44417381 | 24.08828926 | 24.30966377 | 24.46749687 |
| 28.32984161 | 27.62512589 | 28.28542137 | 28.20736694 |
| 20.07179832 | 20.06565857 | 19.25709534 | 19.87299347 |
| 19.63223076 | 22.22320175 | 22.1866169  | 19.50886726 |
| 27.75200272 | 28.00683403 | 28.2423172  | 27.99991608 |
| 25.85676193 | 25.82267189 | 26.01971054 | 25.81926537 |
| 22.89670563 | 22.63083076 | 23.26913643 | 19.60027885 |



|             |             |             |             |
|-------------|-------------|-------------|-------------|
| 28.11802864 | 28.1763134  | 28.16062737 | 28.16451645 |
| 30.04231262 | 29.90913391 | 29.96154594 | 30.00931931 |
| 29.6123333  | 29.59537506 | 29.44367599 | 29.29410362 |
| 25.10693359 | 24.44436455 | 23.60218239 | 24.5114727  |
| 25.97495651 | 25.65744591 | 25.8182888  | 25.59753036 |
| 29.20144272 | 29.41621017 | 29.16367722 | 29.26847649 |
| 24.78586388 | 25.27891541 | 24.75000954 | 24.84713745 |
| 27.2380867  | 27.41409492 | 27.34883118 | 27.21900368 |
| 27.6408596  | 27.88174438 | 27.6205883  | 27.78069305 |
| 24.10197449 | 24.38811111 | 23.85946465 | 23.69285393 |
| 29.79217529 | 29.53599167 | 29.56793976 | 29.41288376 |
| 31.04335594 | 31.07546234 | 31.0012188  | 30.98148537 |
| 27.82559776 | 27.35707855 | 28.03543282 | 27.44545364 |
| 29.99213028 | 30.16086769 | 29.95532227 | 29.98168945 |
| 27.11137772 | 27.27124023 | 26.91832161 | 26.96080017 |
| 25.18135452 | 25.82284164 | 25.07255173 | 24.9595623  |
| 24.2186718  | 24.71774673 | 24.48640251 | 24.42579269 |
| 29.52960205 | 29.50568962 | 29.91669846 | 29.53688049 |
| 33.608078   | 33.68070602 | 33.56774139 | 33.55316162 |
| 24.91492653 | 25.14148903 | 25.00633049 | 25.08411789 |
| 27.24399757 | 27.67418098 | 26.97891045 | 27.43388367 |
| 23.57577133 | 24.16261673 | 23.95358086 | 24.38060188 |
| 26.45792007 | 26.32685471 | 26.4648819  | 26.46463394 |
| 22.23227882 | 22.28886795 | 22.87704468 | 22.59224701 |
| 22.70406723 | 22.56583595 | 21.9642334  | 20.17825508 |
| 25.90788651 | 26.37769318 | 26.46940804 | 26.47159576 |
| 22.99201393 | 23.20791626 | 19.80871582 | 19.58839226 |
| 22.72033691 | 22.33530045 | 20.70336723 | 20.47111113 |
| 22.57258224 | 22.91356659 | 23.44139099 | 21.7598877  |
| 27.30825806 | 27.55844498 | 27.51818275 | 27.62016869 |
| 29.1683712  | 29.32960701 | 29.77398109 | 29.38849831 |
| 29.14632416 | 28.67505646 | 29.82201576 | 28.75620842 |
| 26.45425224 | 26.43647575 | 27.61722755 | 26.44129562 |
| 21.67413521 | 22.2061882  | 21.68110275 | 20.88844299 |
| 22.41835976 | 22.26616478 | 22.10993195 | 22.26690865 |
| 20.33325005 | 21.68028831 | 21.59755325 | 21.40660095 |
| 23.23088646 | 24.01631355 | 24.19189453 | 24.24001694 |
| 28.1484108  | 28.31229019 | 27.89411736 | 27.94536591 |
| 25.72559357 | 24.09900665 | 25.52276993 | 25.77545166 |
| 22.67917061 | 23.05487061 | 20.57699203 | 20.69420242 |
| 25.89358521 | 25.2888031  | 25.72413826 | 26.59562492 |

|             |             |             |             |
|-------------|-------------|-------------|-------------|
| 21.65092659 | 21.90708923 | 21.91768837 | 21.63165283 |
| 21.00573158 | 21.46148872 | 20.78044701 | 21.85323334 |
| 24.19400215 | 24.5341568  | 24.38890076 | 24.28298569 |
| 23.76799774 | 23.29949951 | 22.74833298 | 22.75472641 |
| 20.50917625 | 22.810215   | 21.59996033 | 22.68483162 |
| 27.83905983 | 27.83340073 | 28.1791172  | 27.53103447 |
| 25.58158684 | 25.04701805 | 25.37497711 | 25.25878906 |
| 23.46313667 | 23.72546387 | 23.71554947 | 23.69338608 |
| 26.48810577 | 26.38922882 | 26.00577354 | 26.71502495 |
| 24.36579704 | 24.5892086  | 24.29670143 | 24.69975281 |
| 22.49590302 | 19.86380577 | 21.54372597 | 20.53069496 |
| 21.68431664 | 22.87558365 | 23.05513573 | 22.82632828 |
| 25.84357262 | 25.97261429 | 25.50597382 | 25.92589951 |
| 24.36419487 | 25.06858063 | 25.06500816 | 24.22169876 |
| 20.94152451 | 22.64636421 | 21.40753555 | 21.35479355 |
| 29.25817871 | 29.3480072  | 29.13687325 | 29.14821815 |
| 27.07183647 | 27.38755417 | 27.05455208 | 27.00206566 |
| 21.95500183 | 22.56541824 | 23.34177399 | 22.38763809 |
| 27.58670616 | 28.0485878  | 27.71115685 | 27.91376305 |
| 22.21513557 | 22.36260223 | 22.27067757 | 21.61737442 |
| 26.85424232 | 27.16700935 | 27.26767349 | 27.30591202 |
| 21.86400795 | 22.86408424 | 23.17497826 | 21.42653847 |
| 20.96685791 | 22.51161766 | 20.33418465 | 22.26195526 |
| 24.04117966 | 24.0322094  | 23.552742   | 23.08386612 |
| 22.8352623  | 23.98737144 | 23.45638466 | 24.29761124 |
| 26.03111649 | 26.44292641 | 26.05839729 | 26.28607368 |
| 25.86261368 | 26.10617447 | 25.94561195 | 25.83525848 |
| 23.25695419 | 22.87363243 | 20.21628571 | 20.55442238 |
| 30.16973495 | 30.39141083 | 30.44233322 | 30.43559265 |
| 26.13498497 | 26.09228706 | 25.64866829 | 26.10123253 |
| 27.35262299 | 27.60116196 | 27.59512711 | 27.60978127 |
| 31.02029037 | 30.79187965 | 30.63961792 | 30.58208084 |
| 25.31337166 | 25.45506859 | 25.15085411 | 25.30023193 |
| 25.97026825 | 26.42539215 | 25.77127647 | 26.41932869 |
| 26.93988419 | 26.62435913 | 26.7522583  | 26.97289848 |
| 25.72956657 | 26.3521347  | 26.25333405 | 26.49917412 |
| 24.13241768 | 25.37315178 | 24.78775787 | 25.4306488  |
| 25.05767441 | 25.24129105 | 25.40125847 | 25.49759293 |
| 24.57732773 | 24.17919159 | 24.86891365 | 24.10485649 |
| 26.39448738 | 26.80279541 | 26.86620331 | 26.66193771 |
| 22.58378029 | 22.96358109 | 22.94037819 | 23.08069801 |

|             |             |             |             |
|-------------|-------------|-------------|-------------|
| 26.11439896 | 26.2312336  | 26.80587387 | 26.76040268 |
| 22.77637672 | 22.84111214 | 22.77970505 | 23.10798645 |
| 24.13656998 | 23.99144363 | 23.93328094 | 24.34292793 |
| 22.41074753 | 21.86075401 | 21.72325706 | 23.89022636 |
| 27.37277031 | 27.51765823 | 27.49312401 | 27.40616608 |
| 24.44309998 | 24.4630127  | 24.78116798 | 24.89138603 |
| 24.90476608 | 25.28792381 | 25.21048164 | 25.06800652 |
| 23.4655056  | 23.67863274 | 23.4913044  | 19.47979355 |
| 26.55882454 | 26.67774773 | 26.19067192 | 26.6069603  |
| 25.24724388 | 25.66402817 | 25.12376213 | 25.20022774 |
| 23.10702896 | 23.28022575 | 22.60462761 | 23.35917473 |
| 23.99178886 | 23.88864708 | 24.23943329 | 23.83325577 |
| 25.26888657 | 25.63328362 | 25.22637367 | 25.29845047 |
| 22.49057007 | 22.83770943 | 22.5487957  | 20.37135696 |
| 22.80469322 | 23.15690613 | 22.95480537 | 22.94856453 |
| 20.28063583 | 21.88069344 | 21.71908379 | 22.39670753 |
| 23.28587914 | 24.60382462 | 24.25695419 | 24.23542213 |
| 24.9647274  | 25.07398224 | 25.07537079 | 25.46348    |
| 23.85252953 | 24.46045303 | 24.41866875 | 24.7206192  |
| 22.17873573 | 20.47343636 | 21.22311401 | 21.10922241 |
| 24.93966103 | 21.17958069 | 24.74929428 | 23.69242859 |
| 26.99010086 | 26.61988831 | 26.89862251 | 27.13065147 |
| 24.82065201 | 25.4299469  | 25.10297585 | 25.42572784 |
| 23.36038017 | 25.08646774 | 24.65981483 | 25.00478935 |
| 24.40256119 | 24.52390671 | 24.52623749 | 24.24408913 |
| 24.67341232 | 19.94020081 | 21.27726364 | 29.78732491 |
| 20.44021988 | 18.67921638 | 20.30839157 | 25.54760361 |
| 19.54439545 | 21.04450035 | 19.68760109 | 25.86440849 |
| 20.53454971 | 20.77140808 | 19.55020523 | 25.6430912  |
| 20.52599335 | 21.26520729 | 20.29392242 | 24.68179893 |
| 21.5782032  | 21.48963737 | 20.20148277 | 23.15918732 |
| 26.278862   | 19.98792648 | 19.94041061 | 29.18013573 |
| 19.2852726  | 22.28993607 | 21.855896   | 21.84984016 |
| 21.73231316 | 21.81073189 | 22.68470192 | 22.80878258 |
| 19.38146019 | 22.97501755 | 22.92983627 | 22.32904243 |
| 26.86950111 | 26.09006691 | 25.68845749 | 26.33888817 |
| 28.75423431 | 28.40482712 | 28.32834435 | 28.46676636 |
| 30.02088737 | 29.86724854 | 29.75531769 | 29.90856171 |
| 25.41053963 | 25.26090813 | 24.1914444  | 24.78705978 |
| 30.94300461 | 30.81497574 | 30.71816444 | 30.75899124 |
| 30.15773964 | 29.88127899 | 29.78701401 | 29.81593704 |

|             |             |             |             |
|-------------|-------------|-------------|-------------|
| 22.88840675 | 22.67947197 | 22.9099102  | 23.17837143 |
| 24.90283585 | 24.96741295 | 24.93296623 | 24.77228355 |
| 21.36834717 | 22.79239273 | 22.08219337 | 22.9779377  |
| 20.50366402 | 22.28988075 | 23.07362175 | 22.60650444 |
| 22.96310425 | 23.37185669 | 22.81606865 | 23.45713615 |
| 25.33568764 | 25.3033371  | 25.52802658 | 25.16188622 |
| 21.41002274 | 21.03328514 | 21.38216019 | 19.77961159 |
| 24.94104958 | 24.14195824 | 24.37072563 | 24.49570274 |
| 25.00902557 | 24.75496101 | 24.78496552 | 25.17995071 |
| 28.0131321  | 28.15894318 | 28.01887131 | 28.16192436 |
| 29.37722588 | 29.36790466 | 29.83955574 | 29.59151077 |
| 27.21382332 | 27.0674324  | 27.57101822 | 27.43141365 |
| 24.2303009  | 24.54209137 | 23.51014519 | 23.05453873 |
| 24.46880341 | 24.52563858 | 24.11083984 | 23.62700653 |
| 21.76109314 | 21.98196602 | 21.65324783 | 21.31329536 |
| 25.71541786 | 25.95178223 | 26.31836319 | 25.70985603 |
| 24.28164101 | 22.29930305 | 25.08594131 | 22.92759514 |
| 31.92060852 | 31.69838715 | 31.54669189 | 31.57307816 |
| 26.64636421 | 25.90485764 | 25.12439346 | 24.34908295 |
| 23.53409576 | 23.36546326 | 22.95281792 | 23.40535545 |
| 27.35649109 | 27.04395676 | 27.09928703 | 26.97530746 |
| 23.53812981 | 23.98311424 | 24.20411491 | 24.44316292 |
| 27.42478371 | 27.49800301 | 27.3358593  | 27.36636353 |
| 26.88774109 | 26.6477356  | 26.6159668  | 26.47954178 |
| 21.50013542 | 21.52936172 | 22.3857708  | 21.92690849 |
| 24.99127007 | 24.80000877 | 26.15015602 | 26.25183678 |
| 25.84143829 | 25.90041924 | 25.6340313  | 25.30521584 |
| 24.06324005 | 24.23264313 | 24.11830711 | 23.26499176 |
| 28.78447342 | 28.75066185 | 28.87458229 | 28.64395714 |
| 23.48283768 | 24.35776711 | 19.42170715 | 23.56232262 |
| 31.67568779 | 31.21477318 | 31.33148766 | 31.14789009 |
| 27.99172401 | 27.89029503 | 28.02051544 | 27.87396622 |
| 25.74834824 | 25.98093796 | 25.81870461 | 25.72580338 |
| 28.55369377 | 28.7371521  | 28.52850342 | 28.4154644  |
| 24.31001091 | 24.62371635 | 24.8759594  | 24.84985924 |
| 25.16349983 | 25.69421005 | 25.73551941 | 25.69389153 |
| 30.13699532 | 30.06303978 | 30.14770889 | 30.20943642 |
| 23.34732819 | 23.05887222 | 22.94470978 | 23.29544067 |
| 21.92723465 | 22.68133926 | 19.52043724 | 21.96979332 |
| 31.33351517 | 31.36087036 | 31.10268211 | 30.94914246 |
| 28.21502686 | 28.3346653  | 28.23562241 | 28.24748802 |

|             |             |             |             |
|-------------|-------------|-------------|-------------|
| 24.83711243 | 25.14109993 | 24.64146614 | 24.81728935 |
| 26.19524193 | 26.30690384 | 26.52547455 | 26.30692101 |
| 27.72338295 | 28.13506317 | 28.25164795 | 28.66803741 |
| 23.19618034 | 22.92819214 | 22.17392731 | 22.11263847 |
| 20.69736481 | 24.65829086 | 24.86069679 | 24.72941208 |
| 24.44493294 | 25.21922493 | 20.30049896 | 19.92555428 |
| 26.49562645 | 26.77064705 | 26.50554848 | 26.53417015 |
| 24.72759438 | 25.32464218 | 25.22221375 | 25.25824928 |
| 22.02722359 | 22.67245293 | 22.98431396 | 21.94488716 |
| 22.07825661 | 22.48490524 | 22.30955315 | 21.15992546 |
| 23.76688576 | 24.63936996 | 23.65031433 | 23.40171432 |
| 27.21539688 | 27.17131042 | 27.27319908 | 27.29360008 |
| 28.71066475 | 28.73505402 | 28.94890594 | 28.70800209 |
| 23.36666298 | 23.51653099 | 23.09474564 | 23.08406067 |
| 24.16599274 | 23.59571075 | 23.69561768 | 24.3046608  |
| 30.86828041 | 30.61069679 | 30.76706696 | 30.76769829 |
| 20.04835701 | 19.57431602 | 19.67969322 | 21.94037819 |
| 22.61580467 | 23.28855705 | 22.47550964 | 23.03795052 |
| 32.87189865 | 32.94701767 | 32.59085083 | 32.67636108 |
| 25.66158295 | 25.34306335 | 25.60543633 | 25.11279106 |
| 23.58187294 | 23.57242012 | 23.84718513 | 23.50203133 |
| 24.04451942 | 24.6003685  | 24.7204628  | 23.91706848 |
| 26.16031075 | 26.99690437 | 26.79921722 | 26.66722679 |
| 24.97219849 | 25.67370987 | 25.32824135 | 25.22449684 |
| 20.32805634 | 21.33638763 | 21.28872681 | 20.45794868 |
| 24.74478531 | 24.61133003 | 22.86470604 | 23.9330101  |
| 24.07169342 | 24.44139099 | 24.24249077 | 25.33848    |
| 25.76567268 | 25.32209778 | 25.8836689  | 25.8245182  |
| 23.41053963 | 23.70091629 | 23.67335892 | 24.10333633 |
| 24.54845619 | 25.58720589 | 24.83200073 | 24.99907875 |
| 24.1985054  | 24.30646896 | 23.53599548 | 24.7810173  |
| 26.68177223 | 26.88739204 | 26.83110619 | 26.98239708 |
| 25.8712883  | 25.58897972 | 23.76283836 | 25.92002678 |
| 28.34078979 | 28.38488007 | 27.82917213 | 28.16427803 |
| 24.40334129 | 24.35863876 | 24.23637199 | 24.05515289 |
| 25.35470963 | 25.36108398 | 24.67997551 | 24.99330139 |
| 23.01624489 | 23.31118965 | 23.01842117 | 23.48357582 |
| 24.69901085 | 24.75108337 | 24.96137428 | 24.8191433  |
| 20.8795166  | 22.22975731 | 21.94370842 | 22.00829887 |
| 22.9977951  | 22.51357079 | 20.58981133 | 18.77374268 |
| 23.97447586 | 23.69093704 | 23.88446045 | 23.70830345 |

|             |             |             |             |
|-------------|-------------|-------------|-------------|
| 26.98294067 | 26.58132744 | 26.29778671 | 26.58333778 |
| 23.39884758 | 22.7488842  | 20.2843647  | 20.75255966 |
| 25.84685135 | 26.03975868 | 25.24190903 | 25.99433708 |
| 19.80275345 | 21.87612724 | 22.07368851 | 21.89929008 |
| 24.38949203 | 25.24564934 | 24.13531876 | 24.57542419 |
| 24.23103333 | 23.89919853 | 23.70672417 | 24.27916336 |
| 22.34057999 | 22.26330185 | 22.86081123 | 22.43984413 |
| 22.53744125 | 22.51722908 | 21.21160889 | 22.1601162  |
| 21.78244781 | 22.94688797 | 22.98692131 | 22.73721123 |
| 26.64278793 | 27.20694733 | 27.02210426 | 26.91672707 |
| 25.62914848 | 24.10789108 | 26.13137817 | 24.15846252 |
| 22.51874161 | 20.80163765 | 21.49662971 | 21.71997452 |
| 23.77303886 | 23.824543   | 23.58267784 | 23.83422089 |
| 19.09719658 | 21.69046783 | 21.60878372 | 21.39435387 |
| 25.00328827 | 24.55596161 | 24.57380867 | 24.87464523 |
| 21.69595718 | 22.1160717  | 21.48222351 | 21.69926643 |
| 29.21567535 | 21.912323   | 14.83930206 | 20.96476555 |
| 24.89189529 | 24.93179321 | 25.43096733 | 25.15414047 |
| 24.87628555 | 24.84594154 | 25.22956657 | 25.5331459  |
| 19.89146233 | 23.16625404 | 23.160326   | 22.61600494 |
| 23.24247551 | 23.55543518 | 23.57450104 | 23.66806602 |
| 23.19871521 | 22.46622849 | 21.97840881 | 22.59423065 |
| 28.21062279 | 28.26874352 | 27.44434929 | 27.40047836 |
| 23.6866703  | 23.90747452 | 23.90967178 | 24.28630257 |
| 28.79977417 | 28.4672718  | 28.48623466 | 28.71266556 |
| 29.76995277 | 29.47842407 | 30.21904945 | 29.66197014 |
| 23.57068443 | 23.87192345 | 23.6307869  | 21.61785889 |
| 27.30443382 | 27.32010269 | 27.258358   | 27.56725121 |
| 25.17417145 | 25.5897522  | 25.57588577 | 25.39888    |
| 24.94095993 | 25.50008774 | 26.31021881 | 25.15379333 |
| 22.00460052 | 22.69574547 | 23.05027771 | 22.89372826 |
| 22.74658966 | 22.80463409 | 23.02147293 | 22.3155899  |
| 20.18228722 | 22.82382393 | 22.65121269 | 23.0145607  |
| 26.0794239  | 25.56758499 | 25.4361248  | 25.5769825  |
| 30.87905884 | 31.29690742 | 31.50085449 | 31.53110886 |
| 27.50149918 | 26.36666298 | 26.81164169 | 26.78992271 |
| 29.69541168 | 29.44813538 | 29.32785225 | 29.56641579 |
| 19.23407555 | 22.76678467 | 22.46191406 | 22.37174988 |
| 24.66882324 | 24.11553192 | 24.12801743 | 24.18381691 |
| 24.33687973 | 23.47506523 | 24.30667686 | 24.77851295 |
| 22.04153061 | 22.11260796 | 21.64504433 | 23.3566246  |

|             |             |             |             |
|-------------|-------------|-------------|-------------|
| 24.06907272 | 24.37802315 | 24.34962273 | 24.38811111 |
| 21.42507362 | 24.63776779 | 24.46450806 | 19.97456741 |
| 21.42966652 | 23.56975746 | 23.18339348 | 20.47201347 |
| 28.03611565 | 27.96680832 | 27.98706818 | 27.93106079 |
| 24.72878838 | 24.85433769 | 24.91720581 | 24.16200256 |
| 23.08154297 | 23.1181488  | 22.96225739 | 22.89358139 |
| 21.4719429  | 21.30763626 | 21.96895027 | 21.10354424 |
| 20.22434998 | 21.66851997 | 20.61764336 | 20.41142082 |
| 20.97168922 | 21.76890564 | 21.77023888 | 21.58407784 |
| 24.78855515 | 24.04109573 | 19.56742859 | 24.09900665 |
| 22.73034477 | 22.54224586 | 23.07954216 | 22.57253647 |
| 24.84402657 | 24.72108841 | 24.70382309 | 24.71392441 |
| 24.58800697 | 24.23059273 | 25.19561768 | 25.09643555 |
| 25.92549133 | 25.76761818 | 26.54965973 | 26.00320244 |
| 23.39806557 | 23.29600143 | 23.55566978 | 23.8303566  |
| 22.6060524  | 22.82956314 | 22.43748474 | 22.7585144  |
| 30.37015343 | 24.64883423 | 22.38780785 | 23.5892086  |
| 26.14941978 | 26.17981911 | 26.10809135 | 25.6135807  |
| 22.72945404 | 22.86727333 | 22.80163765 | 23.23505783 |
| 23.33687973 | 24.54763222 | 23.46101379 | 25.14160728 |
| 23.55051231 | 20.89993477 | 23.48591232 | 21.73413277 |
| 22.2900486  | 22.3631382  | 22.7817688  | 22.66092491 |
| 24.48572731 | 24.1532135  | 24.98979759 | 24.34671783 |
| 24.35790062 | 24.3653965  | 24.46668816 | 24.44688988 |
| 30.42352104 | 30.08334541 | 30.12410736 | 30.11545181 |
| 23.53219604 | 22.71596718 | 21.33192062 | 23.24942207 |
| 25.78750801 | 24.92338562 | 25.59135056 | 25.26008224 |
| 26.12490654 | 26.26447296 | 25.93791199 | 26.16098404 |
| 24.75082779 | 24.99804497 | 24.84732819 | 24.58468628 |
| 25.98407173 | 26.22177124 | 25.97969627 | 25.90350342 |
| 27.15826988 | 27.47869492 | 27.47312927 | 27.30190659 |
| 28.70335579 | 28.64533234 | 29.46390533 | 28.21192169 |
| 20.6382885  | 23.32526016 | 23.35676003 | 23.33319855 |
| 25.25709915 | 25.42322922 | 25.6092453  | 25.125103   |
| 22.21812439 | 22.70746231 | 21.84835052 | 23.80675888 |
| 21.6536026  | 22.3558197  | 22.82341576 | 22.25159073 |
| 21.9338398  | 22.27506256 | 23.14896965 | 23.25030518 |
| 22.33021927 | 22.35261726 | 21.57758331 | 22.42490768 |
| 27.22545433 | 27.32044601 | 27.40657234 | 27.19102859 |
| 20.47278595 | 20.26760292 | 23.04811668 | 20.71291924 |
| 24.34638023 | 24.19497871 | 24.61240005 | 24.22809982 |

|             |             |             |             |
|-------------|-------------|-------------|-------------|
| 28.49712753 | 28.33321571 | 28.80464363 | 28.65413666 |
| 23.32937241 | 23.26356125 | 24.05109024 | 23.61009216 |
| 27.0488472  | 27.14860535 | 26.93696785 | 27.13447571 |
| 24.68869781 | 24.82847023 | 24.50324631 | 24.82206345 |
| 24.72582817 | 25.57013512 | 25.24339867 | 25.30236053 |
| 22.62408447 | 22.82667732 | 22.02215195 | 22.16478157 |
| 21.22045898 | 21.3226223  | 21.30084038 | 21.61974907 |
| 22.07810402 | 22.38924217 | 21.98983192 | 21.96259308 |
| 30.22848511 | 30.13540649 | 30.062397   | 30.06753349 |
| 34.86502838 | 34.51782227 | 34.50267029 | 34.3513298  |
| 23.78526497 | 22.68792915 | 23.09035873 | 23.36693001 |
| 27.17035484 | 26.35250473 | 26.5780201  | 26.44983673 |
| 25.15429497 | 22.94763756 | 32.21396255 | 22.84174538 |
| 29.0493412  | 29.00557709 | 28.84950829 | 28.93753052 |
| 27.36419487 | 26.61245537 | 29.55588913 | 26.06804657 |
| 27.66146088 | 27.48323822 | 27.20536423 | 27.17207336 |
| 32.1846199  | 32.06708527 | 31.97674751 | 31.93160439 |
| 30.89200592 | 30.86702919 | 30.76263809 | 30.50682449 |
| 30.47769165 | 30.3108387  | 30.31397629 | 30.2822876  |
| 22.60546494 | 22.77396393 | 18.69830322 | 22.81581497 |
| 22.92208862 | 21.69989204 | 20.30311394 | 23.85414696 |
| 30.31764603 | 30.43251038 | 30.22216415 | 30.27164078 |
| 24.97543716 | 25.75266647 | 25.49963188 | 25.44335365 |
| 22.15875435 | 22.81626511 | 21.68221855 | 21.99844933 |
| 27.51908302 | 27.76420593 | 27.51314545 | 27.39966393 |
| 23.40210533 | 23.0068264  | 22.98233223 | 22.9587574  |
| 20.9151001  | 21.57431602 | 20.58159828 | 21.22199059 |
| 24.02445221 | 24.47982025 | 24.72103691 | 24.48332977 |
| 28.33836937 | 27.42278099 | 27.91461945 | 28.11798096 |
| 24.86046028 | 25.10101318 | 25.03489876 | 25.54813194 |
| 25.53783226 | 24.83547401 | 25.74077797 | 25.68214798 |
| 23.39034462 | 22.93953514 | 22.60360909 | 24.0202198  |
| 22.67256165 | 23.10428047 | 21.89537621 | 22.81401634 |
| 20.18336487 | 20.95432663 | 21.67740822 | 21.51349831 |
| 24.81675339 | 25.40914917 | 24.78046608 | 24.73163986 |
| 24.36165237 | 24.37491035 | 24.14250374 | 24.31962013 |
| 22.47271156 | 21.8416481  | 20.16448212 | 22.10347939 |
| 23.89226532 | 24.94100571 | 24.45356178 | 24.63344955 |
| 24.82972908 | 25.10113335 | 25.25753021 | 25.0521698  |
| 25.89356232 | 25.95475769 | 25.73670578 | 25.77039337 |
| 25.09018898 | 25.08294106 | 25.15826988 | 25.22361374 |



|             |             |             |             |
|-------------|-------------|-------------|-------------|
| 24.79872322 | 24.81440735 | 24.5266552  | 24.55929184 |
| 22.75983429 | 23.50881577 | 22.7702179  | 23.70746231 |
| 23.93957138 | 24.15776825 | 23.71690941 | 24.11577034 |
| 23.1725235  | 22.83016396 | 22.60526085 | 22.63103104 |
| 26.11320877 | 26.00393105 | 26.0175457  | 26.00750732 |
| 23.59832573 | 23.81997108 | 23.62811852 | 21.08252716 |
| 24.94167709 | 25.40561485 | 24.91488075 | 25.02407265 |
| 26.96455193 | 27.04635239 | 27.10858917 | 26.97486877 |
| 22.48797417 | 22.66453171 | 22.92529678 | 22.67329407 |
| 26.29538727 | 26.04053116 | 25.66356659 | 25.57406807 |
| 27.21271133 | 27.62964821 | 27.43404198 | 27.28550911 |
| 21.96426964 | 20.36983299 | 22.31002426 | 21.14863586 |
| 26.53192711 | 26.50216866 | 27.12317085 | 26.61147118 |
| 22.83551216 | 22.57574844 | 23.93309975 | 23.40457535 |
| 25.08845139 | 24.28735924 | 25.322752   | 24.56267357 |
| 24.63145256 | 24.85899162 | 25.31679344 | 24.59786987 |
| 22.22873116 | 22.60177422 | 23.00336647 | 22.08751297 |
| 24.34820557 | 24.15977097 | 24.43466377 | 23.68163872 |
| 26.49193192 | 25.79578018 | 27.02316284 | 26.06603622 |
| 22.78334808 | 22.83707428 | 24.09595299 | 23.38258171 |
| 24.61554527 | 24.71387291 | 25.37895012 | 24.78701019 |
| 26.2362442  | 25.68051338 | 26.51099014 | 25.19730568 |
| 25.98687363 | 26.13684464 | 26.58075333 | 26.27872086 |
| 22.00302315 | 21.31557083 | 20.63552094 | 21.83915138 |
| 20.72758484 | 20.03012276 | 20.72400665 | 20.21193123 |
| 25.16273308 | 25.44934845 | 25.9601593  | 25.31834412 |
| 24.84455299 | 24.77585411 | 25.62053299 | 24.62433052 |
| 23.55660439 | 23.47122383 | 24.20500946 | 23.33197021 |
| 24.98815155 | 20.94561386 | 25.27692986 | 24.50342751 |
| 22.15526962 | 22.63648415 | 24.08172226 | 22.38411114 |
| 22.84995461 | 23.64987564 | 23.52121162 | 22.69824791 |
| 22.6216507  | 21.40562248 | 23.98789215 | 22.92288589 |
| 24.23739243 | 24.40989304 | 25.20519638 | 24.41937637 |
| 24.77640533 | 24.63306236 | 25.411026   | 24.73871803 |
| 26.88331985 | 26.67344093 | 27.58734894 | 26.89029503 |
| 26.47517204 | 26.39278603 | 27.02643776 | 26.43801498 |
| 25.05017662 | 25.3973465  | 25.98888969 | 25.44079018 |
| 23.91150284 | 24.4225235  | 24.78436661 | 24.10453606 |
| 25.27301979 | 25.31108475 | 25.41028214 | 20.16012001 |
| 24.02867317 | 20.3453846  | 24.45192719 | 21.17658043 |
| 24.5817585  | 24.67287445 | 24.98407173 | 24.42021179 |

|             |             |             |             |
|-------------|-------------|-------------|-------------|
| 25.55186081 | 25.28887367 | 25.78663635 | 24.93517113 |
| 26.65717316 | 26.36564636 | 27.191782   | 26.25697327 |
| 24.76283836 | 24.15275002 | 24.89254379 | 24.04826546 |
| 21.36575699 | 20.76190567 | 21.6481514  | 20.9912014  |
| 23.66459656 | 24.90173149 | 23.92415619 | 23.70809364 |
| 26.92998886 | 27.02136421 | 26.99550247 | 26.7398243  |
| 24.48099136 | 25.25292015 | 25.30879593 | 26.06661034 |
| 27.36051559 | 20.98399544 | 20.28084373 | 20.51295853 |
| 27.68351364 | 26.48753738 | 26.80562782 | 26.89942932 |
| 23.41183281 | 23.44771004 | 23.7751503  | 23.81401634 |
| 22.54252815 | 23.05210304 | 22.85079384 | 22.90089417 |
| 22.61744118 | 20.86108398 | 22.69066048 | 21.12254715 |
| 22.53129196 | 22.9359436  | 22.45096016 | 22.38113022 |
| 23.72806168 | 24.07830429 | 23.67766571 | 24.18063545 |
| 23.11403847 | 23.01711273 | 23.03734779 | 22.61405182 |
| 23.08908081 | 23.46388626 | 23.44821358 | 23.32526016 |
| 24.38436127 | 24.83233833 | 24.86476326 | 24.2766819  |
| 28.98527718 | 28.71430397 | 28.26619911 | 28.62055397 |
| 26.75887871 | 26.65703773 | 26.21804237 | 26.57294083 |
| 22.01685715 | 22.64116859 | 22.66379356 | 22.55852127 |
| 23.67745209 | 24.1002903  | 24.19730568 | 23.55133438 |
| 24.5547924  | 25.04051208 | 24.83889198 | 24.81465149 |
| 29.94726181 | 30.60452461 | 30.75334167 | 30.663311   |
| 22.826231   | 23.62834167 | 20.88477135 | 19.97303009 |
| 25.12482834 | 24.98893166 | 24.80656242 | 24.92669106 |
| 28.82662964 | 28.59558868 | 28.59793472 | 28.51408768 |
| 20.77101707 | 21.72037888 | 21.73719215 | 20.03713989 |
| 22.64715385 | 21.29362106 | 23.09119797 | 19.71390152 |
| 24.55841637 | 24.83831406 | 24.82629013 | 24.53350258 |
| 27.24744225 | 27.19891739 | 27.0824337  | 27.25250435 |
| 25.13037682 | 25.6501503  | 25.07549286 | 25.80341148 |
| 23.08016014 | 23.59832573 | 23.60738373 | 23.37238884 |
| 25.14129448 | 24.81220436 | 25.07634926 | 24.82483292 |
| 18.56961632 | 23.94485283 | 23.49497032 | 24.08212852 |
| 26.13852501 | 26.21613884 | 26.24680901 | 26.16438293 |
| 26.32717896 | 26.55754089 | 26.21066856 | 25.73673248 |
| 29.43430138 | 29.12910461 | 29.4420166  | 29.38763618 |
| 24.56313896 | 24.13758659 | 24.9190712  | 24.24008942 |
| 25.67039108 | 25.50969124 | 25.49536705 | 25.33422279 |
| 24.63804436 | 24.688591   | 24.68651009 | 24.55987549 |
| 23.75908279 | 24.15383148 | 24.0214901  | 24.09514809 |

|             |             |             |             |
|-------------|-------------|-------------|-------------|
| 24.52163124 | 24.7426281  | 24.27618408 | 25.21874619 |
| 24.49941826 | 24.66280556 | 24.39512634 | 24.11251259 |
| 25.06443405 | 25.25364113 | 25.04322624 | 25.45466042 |
| 24.67017365 | 24.21845055 | 22.93194771 | 24.60512543 |
| 25.77525139 | 25.92472267 | 26.06433105 | 25.96853256 |
| 24.85965538 | 24.52097321 | 24.72754288 | 24.94543266 |
| 23.26527786 | 23.08556747 | 23.22892189 | 22.90098572 |
| 24.61818123 | 24.60303116 | 24.81904602 | 24.52037239 |
| 20.40447998 | 22.66648483 | 22.43814468 | 22.71034431 |
| 22.81299782 | 23.14175415 | 23.11765671 | 19.30661392 |
| 20.87597656 | 20.59076309 | 20.7135582  | 21.11623001 |
| 24.38449287 | 24.95282555 | 24.85690308 | 25.1866169  |
| 24.58101082 | 24.59097862 | 24.64982033 | 24.5192337  |
| 20.38511276 | 20.3959198  | 21.07632065 | 20.56746292 |
| 22.56917953 | 23.76182365 | 23.98893166 | 23.45651054 |
| 22.64678192 | 22.96299934 | 23.46762085 | 22.67342377 |
| 22.06230164 | 21.88222313 | 21.08425522 | 22.12063408 |
| 22.2593708  | 20.93529129 | 21.59463501 | 22.27454948 |
| 22.43616295 | 22.44753265 | 21.83892059 | 22.12606621 |
| 26.87970161 | 27.11604691 | 26.64361382 | 26.71554947 |
| 25.18922043 | 25.80064964 | 25.69521904 | 25.95024681 |
| 28.03946495 | 28.29438972 | 28.0164299  | 28.06779099 |
| 21.88065529 | 22.75474739 | 20.93580246 | 22.38561249 |
| 29.36523819 | 29.25898743 | 30.26125336 | 29.35041237 |
| 32.50282288 | 32.63998413 | 32.44374084 | 32.2988205  |
| 26.1876545  | 26.43050575 | 26.22938347 | 26.31215858 |
| 25.60727119 | 26.36273956 | 25.70408821 | 25.20936775 |
| 25.61346817 | 25.27177429 | 25.72067261 | 25.25576782 |
| 24.2099247  | 23.7940197  | 24.37338448 | 24.41138077 |
| 24.16177177 | 24.20776749 | 23.82502747 | 23.47283554 |
| 21.30284882 | 22.40717316 | 22.139431   | 22.77615547 |
| 21.09477043 | 23.56825066 | 22.84299088 | 23.0473671  |
| 22.87794304 | 22.38147354 | 22.36038017 | 22.775774   |
| 24.59536934 | 24.72718048 | 24.49704361 | 24.55619621 |
| 25.54223824 | 25.72587967 | 25.64421844 | 25.80072403 |
| 26.23908806 | 26.50940514 | 26.4029026  | 26.44362068 |
| 28.22416687 | 28.38376808 | 28.46310616 | 28.33619881 |
| 23.89189529 | 23.77203178 | 23.68346024 | 23.49460411 |
| 29.04676819 | 28.85801315 | 28.74999046 | 28.80085373 |
| 24.67298126 | 24.4889183  | 24.86651039 | 24.80045319 |
| 26.27810097 | 26.74085426 | 26.52951622 | 26.64663887 |

|             |             |             |             |
|-------------|-------------|-------------|-------------|
| 23.8472805  | 20.21190834 | 19.44192123 | 22.74845505 |
| 25.44534302 | 25.37438011 | 25.30410194 | 25.13637352 |
| 24.10813141 | 22.29100609 | 22.96229362 | 23.42431831 |
| 25.82982445 | 26.1756382  | 26.33522797 | 26.43429756 |
| 24.18055916 | 24.68190765 | 24.53676605 | 24.80877304 |
| 24.61666679 | 25.10549545 | 25.03174782 | 24.6028614  |
| 22.78596306 | 23.31215858 | 22.93039513 | 22.89396858 |
| 22.49996567 | 22.76099205 | 21.05239487 | 21.67787743 |
| 23.42930794 | 24.1848011  | 21.3666935  | 23.45362473 |
| 23.17406464 | 23.89485741 | 23.90756607 | 24.11418152 |
| 28.95210457 | 28.94901657 | 28.88393211 | 29.02472115 |
| 20.40551186 | 21.8020153  | 19.47470474 | 20.09248924 |
| 24.81494522 | 25.38455963 | 25.24383354 | 25.52453423 |
| 27.78930092 | 28.08431053 | 27.95986176 | 28.01238632 |
| 22.35661507 | 19.65237236 | 21.28838921 | 20.20657539 |
| 25.73861504 | 25.9491787  | 25.77381897 | 25.85804176 |
| 20.12174034 | 20.24423409 | 20.29793358 | 20.71657562 |
| 26.19021988 | 26.63685608 | 26.40850067 | 26.30467796 |
| 27.65690041 | 27.48929977 | 27.88075256 | 27.92076492 |
| 27.43475914 | 27.91479111 | 27.69358444 | 27.84613228 |
| 25.55297661 | 26.08288002 | 26.30311012 | 26.12729073 |
| 24.46668816 | 24.84627724 | 25.16207886 | 24.44455338 |
| 25.47837067 | 25.2068367  | 25.9338665  | 25.5903511  |
| 24.96035957 | 25.02643776 | 25.28351402 | 25.12095833 |
| 26.33362579 | 26.17786217 | 25.89434814 | 25.86691093 |
| 24.08488846 | 24.04593468 | 23.82395935 | 23.95704079 |
| 22.59898376 | 22.85614395 | 22.42049408 | 22.69066048 |
| 19.8001442  | 21.56397629 | 21.28528786 | 20.79047203 |
| 24.52838516 | 24.8263855  | 24.83629417 | 24.63034248 |
| 25.24612045 | 25.00966644 | 24.8496685  | 24.98797798 |
| 26.56405449 | 26.42969131 | 26.53778839 | 26.52447319 |
| 27.31345749 | 27.67317009 | 27.50892258 | 27.56536293 |
| 22.64550591 | 22.06943321 | 23.19380569 | 20.4774971  |
| 25.36419487 | 25.57288361 | 25.60238075 | 25.39956474 |
| 22.04576874 | 23.15352249 | 22.97860146 | 23.43733215 |
| 24.68789864 | 25.01907349 | 24.12471008 | 24.27526093 |
| 27.03873253 | 26.83050156 | 27.87003136 | 26.96741295 |
| 27.64897156 | 27.54421616 | 28.43065643 | 27.56841087 |
| 22.97819901 | 20.5102005  | 20.1890583  | 20.98406601 |
| 30.13197708 | 30.17652702 | 30.00209236 | 30.02907372 |
| 26.86230659 | 26.86632156 | 26.69099045 | 26.60724258 |

|             |             |             |             |
|-------------|-------------|-------------|-------------|
| 22.56362724 | 22.64306259 | 22.79384232 | 20.85313034 |
| 27.191782   | 27.18829536 | 27.16720009 | 27.20527077 |
| 21.86086655 | 19.17077255 | 23.15537643 | 22.32849503 |
| 24.41390038 | 24.83841133 | 24.60597229 | 24.91447067 |
| 29.2623291  | 29.10161781 | 28.90414619 | 28.92552567 |
| 28.34802818 | 28.36915398 | 28.27288628 | 28.16283798 |
| 26.62254524 | 26.93190575 | 26.63270187 | 26.82868767 |
| 21.7065773  | 22.32171249 | 21.98631287 | 21.87915993 |
| 20.84689903 | 21.71653366 | 20.97112846 | 20.22135925 |
| 23.89272881 | 24.46929932 | 23.98224449 | 24.0606041  |
| 22.32665825 | 22.75415611 | 22.50127792 | 21.88740158 |
| 25.52868271 | 25.60789299 | 25.54515839 | 25.74678612 |
| 25.63561058 | 25.5339489  | 25.21870804 | 25.36007881 |
| 29.4346199  | 29.51231766 | 29.48828506 | 29.38518906 |
| 24.1300621  | 24.44909668 | 24.31906891 | 24.42335701 |
| 22.051157   | 22.75523567 | 22.59827995 | 22.84115028 |
| 21.69784737 | 20.60982132 | 20.19678116 | 19.70653343 |
| 19.35702705 | 19.6673336  | 18.97381973 | 19.91425323 |
| 25.25824928 | 25.21881866 | 25.3212738  | 25.58548927 |
| 24.06167603 | 24.47667122 | 23.89919853 | 24.54645538 |
| 23.94091606 | 24.21400833 | 23.60862541 | 23.89356232 |
| 20.29839897 | 24.00453186 | 23.524683   | 23.43936348 |
| 25.39034462 | 25.43917274 | 25.6798954  | 25.40762711 |
| 25.7024498  | 25.45472336 | 26.24167252 | 25.64548492 |
| 27.59526825 | 27.77272415 | 27.57614517 | 27.58498764 |
| 28.61143494 | 28.59828949 | 28.56394577 | 28.36694717 |
| 26.83231544 | 27.09717941 | 27.31544495 | 27.32182312 |
| 28.91655731 | 28.72084045 | 29.02377129 | 28.86906052 |
| 27.83340073 | 28.03899574 | 27.90230751 | 28.20475769 |
| 27.73621559 | 27.66030502 | 28.18063545 | 27.89746857 |
| 21.45312119 | 21.9908886  | 21.33358192 | 21.32970047 |
| 21.87072754 | 22.71875    | 23.03333664 | 22.70581818 |
| 30.63027382 | 30.77415466 | 30.64915848 | 30.68787384 |
| 24.13233948 | 24.46693802 | 24.83016396 | 24.46238899 |
| 26.56412697 | 26.32426453 | 26.25598335 | 26.42196274 |
| 21.7704792  | 24.42053413 | 23.83277321 | 23.83797836 |
| 27.70898819 | 27.85525322 | 27.94976807 | 27.48023605 |
| 26.51762772 | 26.39808083 | 26.94525337 | 26.63367271 |
| 22.30047607 | 22.4379673  | 22.45123672 | 22.44473076 |
| 20.09662247 | 20.18350029 | 20.52602196 | 19.57296753 |
| 26.02783012 | 26.51594543 | 25.92730141 | 26.02415657 |

|             |             |             |             |
|-------------|-------------|-------------|-------------|
| 23.55648804 | 24.25349617 | 24.30883026 | 23.72473526 |
| 27.15605354 | 27.62818909 | 27.35825348 | 27.28947258 |
| 22.46238899 | 23.86088562 | 20.8956356  | 21.78506851 |
| 22.60025597 | 22.82925415 | 23.13172722 | 23.01002502 |
| 21.4453125  | 21.49814034 | 19.56252289 | 21.69225883 |
| 21.59868813 | 21.39435387 | 20.90065384 | 21.43984413 |
| 25.45572662 | 25.72842598 | 25.4124794  | 25.32457352 |
| 22.94037819 | 23.1019268  | 22.91719627 | 22.49889565 |
| 24.18472672 | 24.82425117 | 24.64526367 | 24.6814785  |
| 31.26147652 | 31.22968864 | 31.40405655 | 31.13699532 |
| 27.60625458 | 27.67229462 | 28.27954483 | 28.3092556  |
| 21.80703354 | 22.07453728 | 21.98666    | 22.25193787 |
| 23.66177368 | 24.18040657 | 23.1930542  | 24.08188438 |
| 20.39710617 | 23.0920372  | 20.56811905 | 22.79205513 |
| 23.84162903 | 23.92442703 | 23.62956429 | 24.19955444 |
| 27.29754066 | 27.62561226 | 27.67215919 | 27.65047836 |
| 29.19455528 | 29.4698925  | 28.84305    | 29.0351181  |
| 26.70714569 | 27.00163651 | 26.85910988 | 26.86997223 |
| 27.81659317 | 27.53170395 | 28.68525314 | 27.9301033  |
| 25.98997116 | 26.50908852 | 26.28624916 | 26.27181053 |
| 28.25696373 | 28.31440926 | 28.22080421 | 28.31479836 |
| 24.08042145 | 24.3347683  | 24.02267647 | 23.77826309 |
| 30.06162453 | 30.17795372 | 30.03944016 | 30.17557526 |
| 23.21243668 | 23.08102226 | 20.84737778 | 22.36196136 |
| 22.62290192 | 22.79376221 | 22.43568039 | 22.75631523 |
| 23.5118351  | 23.94172096 | 23.54427528 | 23.6959362  |
| 21.88323021 | 21.76190567 | 20.56709099 | 20.553545   |
| 24.20015335 | 24.74447823 | 25.20825195 | 24.95340347 |
| 22.06562424 | 22.01791    | 19.89793015 | 21.88591385 |
| 25.84615707 | 26.05614471 | 26.00703621 | 26.44993019 |
| 24.81470108 | 25.73298645 | 25.10461617 | 25.23578835 |
| 23.10019493 | 22.98872375 | 22.40673065 | 22.79519081 |
| 22.76983452 | 22.82629013 | 22.82510567 | 22.33062935 |
| 22.39333344 | 22.24585915 | 21.63878441 | 23.15593338 |
| 22.92506218 | 22.43888092 | 22.67994308 | 23.19668961 |
| 26.12317085 | 26.49323082 | 26.6807003  | 26.6971035  |
| 26.70120811 | 26.82917213 | 26.90345764 | 26.86537743 |
| 25.07103729 | 24.08950233 | 24.29523087 | 25.11703873 |
| 25.65132713 | 25.68928528 | 25.54507065 | 25.33769608 |
| 25.13754654 | 24.91237068 | 25.30549431 | 24.90398598 |
| 31.52023697 | 31.41331673 | 31.42026329 | 31.44845009 |

|             |             |             |             |
|-------------|-------------|-------------|-------------|
| 27.94782066 | 27.87513924 | 27.72526932 | 27.74175453 |
| 24.18351555 | 24.65113449 | 24.43109512 | 24.75358391 |
| 23.26011848 | 23.32676888 | 23.18812561 | 23.37105942 |
| 22.29389763 | 21.98908806 | 22.06529617 | 21.82950592 |
| 22.79756737 | 23.25839424 | 22.94132805 | 23.29501915 |
| 23.87314415 | 24.17622757 | 24.77329063 | 24.06620026 |
| 28.61452866 | 28.74307251 | 28.80396652 | 28.68368149 |
| 22.17456818 | 21.56258011 | 22.06641388 | 21.4752121  |
| 28.32547379 | 28.30094719 | 28.12238121 | 28.13271141 |
| 24.15784645 | 23.84038162 | 24.12234116 | 24.1633091  |
| 23.9117775  | 23.36252213 | 23.52085304 | 23.28460884 |
| 26.46065521 | 26.93640709 | 26.93021584 | 26.76736641 |
| 25.40636063 | 25.4470787  | 25.46513176 | 25.40301704 |
| 26.06819153 | 26.17885017 | 26.05746841 | 26.20157433 |
| 28.4622097  | 28.7347641  | 28.63540268 | 28.64890289 |
| 24.72987747 | 24.71014595 | 24.54456902 | 24.92877007 |
| 25.99748611 | 26.10587502 | 26.07553291 | 26.16057968 |
| 22.26350212 | 22.98797798 | 22.70685005 | 20.7000885  |
| 23.26313019 | 23.42380714 | 21.71019745 | 23.48983574 |
| 21.96155167 | 22.18007278 | 22.13580322 | 21.96430397 |
| 20.28883934 | 20.90275002 | 20.89932823 | 20.85787201 |
| 24.26927948 | 25.192873   | 24.4897747  | 24.29431915 |
| 23.33073997 | 23.15557861 | 23.1575985  | 23.32731628 |
| 29.52581787 | 29.58956528 | 29.58165169 | 29.59147453 |
| 28.42430305 | 28.13432884 | 28.42634392 | 28.27288628 |
| 26.58319473 | 25.96406555 | 26.55752563 | 26.06825256 |
| 26.7875576  | 26.82844543 | 26.81225395 | 26.7023983  |
| 28.32585907 | 28.38595009 | 28.53289413 | 28.4342804  |
| 28.45658112 | 28.58287239 | 28.67888832 | 28.62244034 |
| 32.13653564 | 32.28151321 | 31.86739731 | 31.78628159 |
| 23.55062866 | 23.60025597 | 23.22455597 | 24.21133614 |
| 24.31243706 | 24.19355011 | 24.15104675 | 23.60444641 |
| 23.99740028 | 24.74396324 | 24.67529869 | 24.54091072 |
| 24.31672287 | 24.59155083 | 24.6692009  | 24.99593353 |
| 25.43237114 | 25.79543304 | 25.40334129 | 25.06829262 |
| 23.94467354 | 24.38738823 | 24.31042671 | 23.84095764 |
| 24.05308151 | 23.85737801 | 24.125103   | 24.17371368 |
| 22.7628994  | 22.45540619 | 22.15295029 | 22.53404999 |
| 23.17783928 | 23.31174469 | 23.08958244 | 20.53897667 |
| 29.16631508 | 28.91698265 | 28.94346619 | 28.89038277 |
| 24.03263092 | 23.80459404 | 24.15707397 | 19.99446106 |

|             |             |             |             |
|-------------|-------------|-------------|-------------|
| 25.55651665 | 25.69742203 | 25.58763504 | 25.41180229 |
| 22.07241249 | 22.30783081 | 21.90417671 | 20.12063599 |
| 20.48211098 | 21.13545799 | 21.40249634 | 21.46109009 |
| 22.81907463 | 23.38968849 | 23.44037819 | 23.5685997  |
| 24.8754425  | 24.68008423 | 24.34150314 | 24.74304008 |
| 24.29858971 | 24.11290932 | 24.22044373 | 23.30785942 |
| 27.47002983 | 26.17165375 | 22.04269981 | 26.72429466 |
| 23.98198318 | 24.62209702 | 24.42630386 | 24.70260811 |
| 23.85718918 | 24.34150314 | 23.9144249  | 24.49862671 |
| 26.45691681 | 26.31499672 | 26.71842575 | 26.63020325 |
| 26.66532898 | 27.15981102 | 27.0521698  | 26.86750031 |
| 26.16067505 | 26.41659355 | 26.31105042 | 26.39949989 |
| 25.36693001 | 25.25003052 | 25.15000153 | 24.59462929 |
| 26.32633972 | 26.27627373 | 26.26799393 | 26.07991219 |
| 25.81555557 | 25.71017075 | 25.96172714 | 26.0375824  |
| 26.05934715 | 25.90129471 | 25.89272881 | 25.70988274 |
| 26.91945839 | 27.27141953 | 27.29368782 | 27.35262299 |
| 26.2457943  | 26.58749199 | 26.49439049 | 26.61484337 |
| 24.59911919 | 25.16353798 | 25.33487129 | 25.09635544 |
| 24.21237564 | 23.6216507  | 24.08180237 | 24.09418106 |
| 23.29459953 | 23.75735474 | 23.51135254 | 22.82793808 |
| 24.42342186 | 24.1380558  | 24.66903877 | 24.5349865  |
| 24.12557602 | 24.30709457 | 23.91287231 | 24.27284241 |
| 25.36999512 | 25.43907738 | 25.25756645 | 25.24445152 |
| 26.4215126  | 26.39507675 | 26.35422134 | 25.93584442 |
| 25.31468582 | 25.50821114 | 25.55631256 | 25.39476585 |
| 25.69715691 | 26.15460396 | 26.06976891 | 25.78740883 |
| 25.52124214 | 26.19334412 | 26.00953865 | 26.25970459 |
| 26.04470634 | 26.31414986 | 26.39693832 | 26.52170563 |
| 24.89384079 | 25.05920219 | 24.76870537 | 24.54521751 |
| 24.20717239 | 24.59985733 | 24.70181656 | 25.45098495 |
| 25.33432579 | 25.69821739 | 24.94525337 | 25.17930603 |
| 23.78666115 | 24.20560646 | 24.12384224 | 24.20284462 |
| 24.6253891  | 23.76364899 | 23.87979507 | 23.62287903 |
| 25.23903275 | 25.25555038 | 25.01128769 | 25.06968689 |
| 23.55637169 | 23.76638031 | 23.10075569 | 23.56581306 |
| 25.66830826 | 26.12921715 | 26.33909035 | 26.39711952 |
| 23.62120247 | 24.22066498 | 24.80847931 | 24.61784554 |
| 23.5378933  | 23.88725281 | 23.65097046 | 23.80891991 |
| 27.28126907 | 27.42989922 | 27.41964912 | 27.36544609 |
| 21.42670059 | 21.50925064 | 21.45878983 | 21.87594032 |



|             |             |             |             |
|-------------|-------------|-------------|-------------|
| 27.9317379  | 28.34735298 | 28.00865173 | 28.30373764 |
| 20.17076874 | 22.10312843 | 19.71617126 | 22.85692215 |
| 22.61562347 | 22.18259048 | 22.14061546 | 20.76607323 |
| 22.24237442 | 22.47447014 | 22.23759651 | 20.18553162 |
| 23.11375237 | 23.30033684 | 23.87970161 | 23.55964279 |
| 26.11592865 | 26.32885742 | 25.9664669  | 26.16905594 |
| 21.91524696 | 21.64996338 | 22.57883644 | 21.60552025 |
| 30.1810379  | 30.47595406 | 30.34657097 | 30.38699913 |
| 23.25638008 | 23.33415413 | 23.38376808 | 23.33633614 |
| 23.54886627 | 23.91688728 | 24.14413834 | 23.85186195 |
| 25.44395256 | 25.91298676 | 25.77876282 | 25.57259369 |
| 23.96402168 | 23.40431595 | 23.64658356 | 24.03355408 |
| 23.34394455 | 23.31146622 | 23.56987381 | 23.46811867 |
| 23.56255722 | 24.4642601  | 24.19955444 | 24.38712502 |
| 21.34910965 | 21.68470192 | 21.56862259 | 22.11648369 |
| 21.90652275 | 19.69385719 | 21.40259933 | 21.06039047 |
| 23.58290672 | 22.2615242  | 23.96807098 | 23.61481667 |
| 23.20930099 | 23.35178185 | 22.40732765 | 20.19664955 |
| 25.54294777 | 25.48566628 | 25.10289574 | 25.24633789 |
| 22.84234047 | 23.00108147 | 23.38007355 | 22.9841938  |
| 25.26842308 | 25.86485863 | 25.28594971 | 25.57016373 |
| 28.07795906 | 28.39030266 | 28.27919006 | 28.40141487 |
| 24.30228996 | 24.49941826 | 24.57074356 | 24.05225182 |
| 28.36652946 | 28.30856133 | 29.90454865 | 28.45497322 |
| 26.38432884 | 26.67128181 | 26.31817245 | 26.22007561 |
| 25.96837997 | 26.23613358 | 26.26665497 | 26.14689827 |
| 24.32724762 | 24.46979713 | 24.74000549 | 24.12147141 |
| 21.78568459 | 22.28999329 | 22.0863781  | 22.28858566 |
| 25.90969467 | 25.58909416 | 25.65766335 | 25.84675407 |
| 26.19473457 | 25.90460587 | 25.617733   | 25.66400146 |
| 22.12842751 | 21.97966576 | 22.25225449 | 21.94667435 |
| 26.4719677  | 26.3552475  | 26.22587776 | 26.05695152 |
| 23.81636238 | 23.88119698 | 23.44151688 | 24.02766228 |
| 26.76711464 | 26.86266136 | 26.70332146 | 26.4317646  |
| 24.70318985 | 24.64322853 | 24.42790222 | 24.48302269 |
| 25.32913208 | 25.37265396 | 25.4266243  | 25.11695862 |
| 20.91093636 | 21.1776123  | 21.54288292 | 21.53293228 |
| 24.88966942 | 24.43803024 | 24.22398186 | 24.24001694 |
| 22.82847977 | 23.12927628 | 23.19436264 | 22.90100479 |
| 24.11830711 | 24.31693077 | 23.64866829 | 24.84302139 |
| 21.45654678 | 24.22214127 | 21.67578506 | 23.84985924 |

|             |             |             |             |
|-------------|-------------|-------------|-------------|
| 26.37972641 | 26.49961662 | 26.30155754 | 26.31760406 |
| 25.14654732 | 25.11251259 | 25.03879547 | 25.05850029 |
| 24.53652954 | 24.41125107 | 24.04184914 | 24.62382889 |
| 26.14012527 | 26.20568085 | 26.12352562 | 26.18888092 |
| 23.44695282 | 20.82614708 | 23.41841125 | 23.44682693 |
| 22.51335335 | 22.92902374 | 22.37512207 | 20.73885918 |
| 28.5007782  | 28.49407768 | 28.46092033 | 28.5241375  |
| 24.94306374 | 24.73520851 | 24.58491516 | 24.29621124 |
| 25.03837776 | 25.21619415 | 24.75378799 | 24.62561226 |
| 22.86296844 | 20.20891571 | 21.05894852 | 20.57105064 |
| 25.78144264 | 25.68300629 | 25.58980942 | 25.08756065 |
| 23.59366035 | 23.74519539 | 23.98285294 | 23.93939209 |
| 20.91721535 | 19.60931969 | 21.12962341 | 19.53666115 |
| 25.48089981 | 25.71625519 | 25.7507267  | 25.4037323  |
| 28.4287014  | 28.37202263 | 28.33056831 | 28.44738579 |
| 20.85741615 | 21.31744194 | 20.67411995 | 20.26477432 |
| 24.338377   | 24.11433983 | 24.21785927 | 23.3925724  |
| 26.34438324 | 26.4507637  | 26.62114716 | 26.54510117 |
| 21.62346077 | 22.13542747 | 22.17575455 | 20.65493393 |
| 24.7536869  | 24.74473381 | 25.04847336 | 24.8023777  |
| 22.84130287 | 23.13941383 | 23.67540741 | 23.39034462 |
| 27.29105377 | 27.5489254  | 27.42606354 | 27.22453499 |
| 20.84337425 | 20.98863792 | 21.30069351 | 20.39465904 |
| 23.28206635 | 23.93337059 | 24.26363182 | 23.04610252 |
| 23.52552032 | 21.48659897 | 23.84861755 | 23.80390549 |
| 25.5532093  | 26.2863903  | 25.92804718 | 26.10555458 |
| 23.0364418  | 23.58932304 | 23.16692734 | 22.32237434 |
| 23.10444069 | 23.61560249 | 23.14766693 | 23.19457245 |
| 27.98901939 | 28.15315628 | 28.14467239 | 27.98847771 |
| 23.67658997 | 23.02098274 | 23.35890579 | 23.48394585 |
| 26.56843948 | 26.77893829 | 26.4652729  | 26.50228882 |
| 22.63827515 | 23.04161453 | 19.33586311 | 22.5079937  |
| 20.3383255  | 21.85627747 | 22.00367355 | 22.20006371 |
| 22.38168526 | 22.54785538 | 22.36027336 | 22.08190155 |
| 25.85737801 | 25.77296257 | 25.56124496 | 25.79731369 |
| 22.84465981 | 20.14347458 | 23.3877182  | 20.67147064 |
| 22.08527756 | 22.27443695 | 22.32066727 | 21.97302246 |
| 23.0245533  | 23.39532089 | 23.73117447 | 23.4636364  |
| 24.97583199 | 23.95890045 | 24.40749741 | 24.48228455 |
| 22.51732445 | 22.36895561 | 22.20681381 | 22.47985649 |
| 24.22545433 | 23.86448097 | 22.92028999 | 23.19547462 |

|             |             |             |             |
|-------------|-------------|-------------|-------------|
| 28.7440033  | 28.51009178 | 28.44363785 | 28.49293327 |
| 22.71946144 | 23.63234138 | 23.09943962 | 23.89448738 |
| 24.66063118 | 24.39695549 | 24.29298592 | 24.55127525 |
| 19.75027275 | 19.66390228 | 20.1293087  | 20.57199669 |
| 22.727211   | 23.13703918 | 22.09119797 | 23.31920624 |
| 21.85995865 | 20.22364998 | 23.55473328 | 22.91364098 |
| 22.76543045 | 22.99627876 | 23.19497871 | 22.94080734 |
| 27.68391609 | 27.86183357 | 27.6977005  | 27.64636421 |
| 25.04922295 | 25.39060593 | 25.41580391 | 25.68059349 |
| 26.4651165  | 26.74970245 | 26.3989296  | 26.61414146 |
| 23.98085022 | 24.22765923 | 24.24437904 | 24.52372742 |
| 22.60138893 | 22.55545807 | 22.73958206 | 22.62012863 |
| 26.78519058 | 26.7425251  | 26.62672806 | 26.24635506 |
| 26.6768055  | 26.72338295 | 26.54056931 | 26.43182945 |
| 23.9996376  | 25.0507164  | 25.37626839 | 25.13602257 |
| 26.56959915 | 26.32572174 | 26.22499466 | 26.29575539 |
| 27.22848511 | 27.32688904 | 27.13486671 | 26.85934639 |
| 25.01137352 | 25.35329628 | 25.41212463 | 24.81884956 |
| 26.32299232 | 26.40877724 | 26.34769821 | 26.39891243 |
| 26.25636101 | 26.71043396 | 26.56086731 | 26.71515656 |
| 26.94100571 | 27.10299492 | 26.8914547  | 26.68939209 |
| 25.42499161 | 25.38725662 | 25.48581886 | 25.44177055 |
| 24.3755722  | 24.43809509 | 24.18963432 | 23.83759308 |
| 23.43999672 | 23.45010376 | 23.85024071 | 23.56917953 |
| 25.25735092 | 25.45271301 | 24.97587585 | 25.37335014 |
| 25.01410103 | 25.05370331 | 24.94301987 | 24.53130341 |
| 26.23545837 | 26.2244606  | 26.49306297 | 26.37417984 |
| 25.35679245 | 24.55508423 | 24.35514641 | 24.98698044 |
| 26.43146133 | 26.72220993 | 26.56411362 | 26.40553474 |
| 25.22571182 | 25.30549431 | 24.93125343 | 25.09703827 |
| 24.87530327 | 24.71387291 | 24.91369438 | 24.90338707 |
| 26.27348328 | 26.33747673 | 26.31115532 | 26.20278931 |
| 24.75317764 | 24.86159706 | 24.90825272 | 24.67981529 |
| 26.85733032 | 26.58247757 | 26.9096489  | 26.77943993 |
| 23.81068611 | 24.32306099 | 24.19046402 | 24.46898842 |
| 26.11223412 | 26.72637367 | 26.47999001 | 26.55786133 |
| 25.41670609 | 25.4964962  | 25.3549118  | 25.2410717  |
| 24.80212975 | 24.56290627 | 24.57905579 | 24.77585411 |
| 23.82308578 | 24.37696457 | 24.5543232  | 24.79733849 |
| 24.18283272 | 24.50712204 | 20.42060471 | 24.08529282 |
| 24.43930054 | 24.37855339 | 24.64273262 | 24.19475365 |

|             |             |             |             |
|-------------|-------------|-------------|-------------|
| 23.75460434 | 23.43771362 | 23.694767   | 23.6449337  |
| 23.4930172  | 23.81342888 | 23.74427223 | 23.7923336  |
| 24.54285812 | 24.8868351  | 24.90609741 | 24.81548309 |
| 28.52499771 | 28.61484337 | 28.5357132  | 28.50074005 |
| 26.30735588 | 26.7167263  | 26.66275215 | 26.35036659 |
| 26.63311768 | 26.62505531 | 26.56822205 | 26.5207634  |
| 26.68592072 | 27.01137352 | 26.85851669 | 26.71607208 |
| 27.04510307 | 26.95471382 | 27.15083313 | 26.74906349 |
| 26.37779236 | 26.45831108 | 26.43437576 | 26.24573898 |
| 24.58319473 | 24.94859886 | 24.94427109 | 24.97736168 |
| 27.35329628 | 27.48485184 | 27.27719498 | 27.0694828  |
| 27.77121353 | 28.10254478 | 27.78842926 | 27.9320755  |
| 27.3662796  | 27.50203133 | 27.32568741 | 27.25349617 |
| 27.65136719 | 27.689991   | 27.42702484 | 27.61870003 |
| 27.80648804 | 28.03196716 | 27.57260895 | 27.86920738 |
| 25.32206345 | 25.79106522 | 25.82648277 | 25.66370201 |
| 25.13088799 | 24.82880974 | 24.9866333  | 24.87464523 |
| 25.92650986 | 25.66579056 | 25.92388344 | 25.68864441 |
| 27.5555954  | 27.66749763 | 27.66431236 | 27.24445152 |
| 24.93111801 | 24.15977097 | 24.61217499 | 24.47642517 |
| 25.55794907 | 26.32721329 | 26.26570702 | 26.0496788  |
| 26.29552841 | 26.29291534 | 26.04558182 | 26.03340721 |
| 23.49203873 | 23.91232491 | 23.03010559 | 23.74949837 |
| 26.05854225 | 26.67397881 | 26.32735062 | 26.53177834 |
| 26.74406624 | 26.96521187 | 26.79277992 | 26.8089447  |
| 26.6320076  | 27.28815269 | 27.09556961 | 27.02136421 |
| 26.3014183  | 26.02028275 | 26.29124832 | 26.21332169 |
| 25.29736519 | 25.32940483 | 25.3322773  | 25.53477859 |
| 21.18265915 | 23.38020515 | 22.98320198 | 20.44895744 |
| 24.71983719 | 24.50051308 | 24.35050011 | 24.23139954 |
| 24.9598732  | 24.90398598 | 24.70709419 | 25.01958275 |
| 25.60749817 | 25.06348801 | 25.23099709 | 25.17459106 |
| 24.92388344 | 24.36519623 | 24.95486832 | 24.91624832 |
| 28.10114288 | 27.55083466 | 28.01600456 | 27.77077293 |
| 27.60872459 | 26.79600143 | 26.89319229 | 26.73156166 |
| 21.81679153 | 22.91897964 | 22.96589088 | 23.02182961 |
| 23.41892624 | 23.87988853 | 20.80112267 | 23.71208954 |
| 26.34763145 | 26.29071999 | 26.47924995 | 26.06964493 |
| 27.58956528 | 27.66817284 | 27.50241089 | 27.26185799 |
| 27.20331192 | 27.65703773 | 27.45661926 | 27.46053123 |
| 26.27017212 | 26.556036   | 26.21269226 | 26.12374306 |

|             |             |             |             |
|-------------|-------------|-------------|-------------|
| 20.90836334 | 20.45020485 | 25.90035057 | 20.97694206 |
| 22.37153816 | 22.43519783 | 22.17648697 | 22.01566696 |
| 26.08510971 | 26.24787712 | 26.16223335 | 26.41865349 |
| 26.91330719 | 27.04531097 | 26.94257164 | 26.99755096 |
| 27.13555336 | 26.89538956 | 26.88483429 | 26.90196228 |
| 28.09471512 | 28.33078194 | 28.1509304  | 28.08992577 |
| 20.25199509 | 19.66612434 | 20.93409157 | 21.4788208  |
| 23.23257065 | 23.71040726 | 22.70322227 | 23.22247887 |
| 27.62797928 | 27.63747787 | 27.70450974 | 27.85132599 |
| 27.35144424 | 27.43244934 | 26.99798012 | 26.90575409 |
| 29.82846069 | 30.13858223 | 29.93466568 | 29.97144699 |
| 20.62203026 | 22.91548347 | 22.17127228 | 22.61285973 |
| 25.55637169 | 25.31993103 | 25.22648239 | 25.15360069 |
| 23.52456284 | 22.56164742 | 22.79076385 | 23.07327843 |
| 22.9281559  | 22.65151787 | 24.05631065 | 22.40374374 |
| 25.88329697 | 25.42723083 | 25.19876671 | 25.43536186 |
| 23.83248329 | 23.46326256 | 22.06690598 | 22.72261238 |
| 26.638237   | 26.93494606 | 26.82880974 | 27.01339722 |
| 24.9907074  | 25.13957787 | 25.10745239 | 25.09232712 |
| 22.7034111  | 23.11017227 | 22.5570488  | 19.47868919 |
| 24.45274544 | 24.70482635 | 24.50099945 | 24.66172028 |
| 20.28416252 | 24.40561485 | 25.20176125 | 24.22044373 |
| 21.87852478 | 21.60064125 | 22.53219604 | 20.48197746 |
| 29.1430912  | 29.52168846 | 29.20874023 | 29.3817482  |
| 22.34581184 | 23.74304008 | 22.64361382 | 25.17645645 |
| 31.96774292 | 32.46557999 | 32.13827896 | 32.13384628 |
| 24.06463814 | 25.36756325 | 25.87513924 | 25.69213486 |
| 26.86714554 | 26.79277992 | 26.22024155 | 27.84242058 |
| 21.89715004 | 21.97757149 | 22.15421867 | 22.36741066 |
| 24.04301643 | 24.22073936 | 24.06808853 | 24.30117416 |
| 24.53605461 | 25.29705048 | 25.02783012 | 25.41403008 |
| 24.60325813 | 20.98804855 | 23.87530327 | 23.78486633 |
| 24.63461304 | 24.97740555 | 25.01873398 | 24.71811295 |
| 24.51231766 | 25.29505539 | 25.30566978 | 25.25230598 |
| 22.59753036 | 22.56097221 | 23.14010239 | 22.90956306 |
| 25.43692017 | 25.50518608 | 25.26352501 | 25.18036842 |
| 22.94256401 | 20.1572628  | 19.97113609 | 22.14456558 |
| 24.03925705 | 24.13406372 | 24.28665543 | 23.6806736  |
| 23.35890579 | 23.866745   | 23.56906319 | 23.24250412 |
| 22.89958572 | 22.83622551 | 21.67783928 | 23.2429409  |
| 24.40691376 | 25.05241776 | 24.72837448 | 24.81665421 |

|             |             |             |             |
|-------------|-------------|-------------|-------------|
| 22.48044968 | 23.09756088 | 22.89393234 | 22.73134041 |
| 24.77198219 | 24.5026989  | 24.87431717 | 24.26198387 |
| 22.70180511 | 22.49604416 | 22.90659332 | 22.3389492  |
| 24.03321838 | 23.90426064 | 23.84995461 | 24.15776825 |
| 22.64107895 | 22.81025505 | 20.72626305 | 23.07337761 |
| 25.27259445 | 25.66755104 | 25.59968758 | 25.66486931 |
| 27.83116722 | 27.6444397  | 28.48550415 | 27.55325508 |
| 26.42624092 | 26.2437973  | 26.88250351 | 25.60791969 |
| 24.60404968 | 24.21185684 | 25.20575523 | 24.0914402  |
| 23.74960136 | 23.26484871 | 23.53445244 | 23.59514046 |
| 23.19875908 | 23.68410301 | 23.26126671 | 22.78470612 |
| 23.552742   | 24.36058235 | 24.12864685 | 24.41834641 |
| 25.5009079  | 25.55786133 | 25.32556725 | 25.24263573 |
| 26.51343155 | 26.64113426 | 26.24249077 | 26.63616371 |
| 18.58641052 | 22.16035652 | 21.8015976  | 21.23227882 |
| 23.57853699 | 21.92936707 | 20.33203888 | 22.03109932 |
| 27.10219383 | 27.32354164 | 27.0896225  | 27.16643333 |
| 25.04959679 | 25.24641037 | 25.92184258 | 25.72788048 |
| 24.53058815 | 24.78805542 | 24.39962959 | 22.69396019 |
| 27.88512421 | 28.07209206 | 28.21488762 | 28.28020859 |
| 22.17542076 | 21.96003151 | 19.11737061 | 22.31343269 |
| 23.49252892 | 20.5973587  | 20.35551071 | 23.63311768 |
| 21.88788605 | 21.34642029 | 21.34380722 | 21.01563263 |
| 18.72925949 | 22.79512978 | 21.69714546 | 20.05029869 |
| 22.02718925 | 22.11254311 | 22.26421928 | 22.42997169 |
| 19.91840744 | 20.96840668 | 20.49426842 | 21.95063019 |
| 25.38972092 | 25.90127182 | 25.52710152 | 25.54889679 |
| 27.69158936 | 27.88809013 | 27.8285675  | 27.81139755 |
| 25.61885262 | 25.72197533 | 25.06155205 | 24.99118423 |
| 23.80891991 | 23.63511276 | 23.59639359 | 23.41454506 |
| 25.27760315 | 24.73417473 | 22.86876297 | 25.77733421 |
| 27.27595329 | 27.30452156 | 27.50066376 | 28.37554741 |
| 30.79443932 | 30.03078461 | 30.89446449 | 30.94914246 |
| 27.74848747 | 26.96993828 | 27.2149353  | 27.590065   |
| 27.77410698 | 26.97388458 | 27.35422134 | 27.82832527 |
| 29.07469749 | 27.75200272 | 28.74784851 | 28.8426609  |
| 23.65948868 | 23.32333565 | 23.66795731 | 23.621315   |
| 21.5681591  | 21.22458649 | 19.91636848 | 21.92059898 |
| 22.84754753 | 19.57154465 | 22.61912155 | 23.30605125 |
| 27.96823692 | 28.36164474 | 28.26771736 | 28.59828949 |
| 29.4518528  | 29.66878128 | 29.53802872 | 29.68565369 |

|             |             |             |             |
|-------------|-------------|-------------|-------------|
| 25.12671852 | 25.40558243 | 25.08893585 | 25.48670959 |
| 27.80550385 | 27.90098381 | 27.89665985 | 27.88820648 |
| 26.72961998 | 27.203125   | 26.5536499  | 27.01605797 |
| 22.2088089  | 22.89727974 | 22.76156044 | 23.06946564 |
| 24.77655602 | 24.89328384 | 24.97421265 | 24.72093201 |
| 24.28573799 | 23.71219444 | 23.75582695 | 24.52957726 |
| 21.76413536 | 21.86578369 | 22.33851242 | 21.9372921  |
| 24.27582932 | 24.99834633 | 24.52223015 | 24.45957756 |
| 20.07745171 | 23.09609795 | 20.44400787 | 22.90851784 |
| 22.12952805 | 22.61681366 | 21.96898651 | 22.00703239 |
| 24.4738884  | 24.09876633 | 24.05075836 | 24.73163986 |
| 23.46724892 | 23.99248123 | 23.6227684  | 23.59126472 |
| 23.24308586 | 22.98495865 | 23.37530708 | 23.38363647 |
| 25.79051971 | 24.63178635 | 24.87834549 | 25.35006142 |
| 26.19044495 | 26.12648392 | 25.86813545 | 25.85725975 |
| 24.65780067 | 25.25922012 | 25.37703133 | 25.4541893  |
| 24.4738884  | 24.64025307 | 23.97044373 | 25.01137352 |
| 28.45615005 | 28.61544037 | 28.26628876 | 28.34040833 |
| 25.11870193 | 25.01656914 | 25.5520668  | 24.45004082 |
| 25.00577354 | 25.23790359 | 25.30862236 | 25.32512283 |
| 26.47473907 | 26.35383606 | 26.41210747 | 26.2206459  |
| 26.73531151 | 27.13016129 | 26.76988983 | 27.11515427 |
| 18.9358902  | 23.45274544 | 23.524683   | 23.50833321 |
| 21.51224518 | 21.47753716 | 21.0263958  | 20.05124664 |
| 26.45038605 | 26.7644577  | 26.83400345 | 27.17436218 |
| 27.83243561 | 27.58024979 | 27.62449837 | 27.53036499 |
| 24.73949051 | 24.67201042 | 23.23341942 | 24.83865166 |
| 29.43091583 | 28.9622364  | 29.39106178 | 29.73398781 |
| 22.84381676 | 22.82785988 | 20.66790581 | 22.79060364 |
| 24.12384224 | 24.2524147  | 24.51099014 | 24.05308151 |
| 24.37590408 | 24.33885384 | 24.32003403 | 24.5469265  |
| 23.50142479 | 21.18713951 | 23.31409836 | 23.07144737 |
| 23.66589928 | 24.15630341 | 23.79847717 | 23.40976334 |
| 23.9185257  | 24.07332802 | 19.69594193 | 24.11481667 |
| 21.37682915 | 20.99690056 | 21.58449173 | 21.75421715 |
| 24.51309967 | 24.70961952 | 23.74909019 | 25.65151787 |
| 22.01202202 | 22.21403885 | 21.79209518 | 22.04316711 |
| 22.84718513 | 21.13071251 | 22.52888489 | 21.60295296 |
| 26.08824921 | 25.90511131 | 25.68584061 | 26.11582947 |
| 23.33619881 | 23.61918831 | 22.8831749  | 23.71544456 |
| 25.64427376 | 25.79953957 | 26.03439522 | 25.94540977 |

|             |             |             |             |
|-------------|-------------|-------------|-------------|
| 26.63547134 | 27.1407299  | 26.6798954  | 26.98793602 |
| 23.82036018 | 21.74284363 | 25.65346146 | 24.57709694 |
| 24.70793533 | 25.00808525 | 24.98580933 | 24.71502495 |
| 27.35716248 | 27.35925865 | 27.3907547  | 27.27710724 |
| 30.32581711 | 30.3521595  | 30.38319206 | 30.20862389 |
| 21.85144234 | 22.09152031 | 23.72140121 | 22.13517761 |
| 27.6768055  | 27.48746109 | 27.69551086 | 27.61813927 |
| 22.23765564 | 22.61649895 | 22.36613083 | 20.68911552 |
| 22.02718925 | 22.04743385 | 21.76696777 | 21.96306992 |
| 21.33259773 | 21.19141388 | 21.52094841 | 21.86879921 |
| 23.00391388 | 21.69195938 | 21.25037384 | 22.51101494 |
| 22.28234863 | 20.28946304 | 22.75172615 | 23.53647041 |
| 24.70609283 | 25.10333633 | 24.8707943  | 24.89003944 |
| 28.77919006 | 28.80150223 | 28.08217812 | 28.69717026 |
| 23.1780529  | 22.88267136 | 23.05298233 | 22.99672699 |
| 23.19312859 | 24.08399582 | 23.63123131 | 23.83402824 |
| 28.0940094  | 28.20508385 | 27.97820091 | 28.1126709  |
| 23.38337326 | 23.31285286 | 20.64009094 | 21.91605377 |
| 23.71868706 | 23.69242859 | 23.71198273 | 23.50591278 |
| 23.3259449  | 23.35016251 | 23.17589188 | 23.02011681 |
| 22.88632393 | 23.11005974 | 23.39008141 | 22.83329391 |
| 20.92691994 | 21.56150818 | 21.387743   | 20.40961838 |
| 21.12053871 | 21.35046005 | 20.47238922 | 21.87904739 |
| 26.17996979 | 26.40186119 | 26.62324142 | 26.39327812 |
| 21.86721611 | 22.90021324 | 22.38110352 | 22.26850891 |
| 20.57380867 | 21.8243084  | 20.45513153 | 21.80781937 |
| 21.55599785 | 22.06114769 | 21.57427025 | 22.00860596 |
| 22.88650894 | 23.77283669 | 23.59149361 | 23.64008713 |
| 25.74213982 | 24.71465874 | 24.61526489 | 24.93867493 |
| 26.38977051 | 26.89330673 | 26.67626762 | 26.91067886 |
| 24.48357582 | 25.08318329 | 24.97640038 | 24.89642906 |
| 23.99886322 | 24.52939796 | 23.92079926 | 24.66307831 |
| 23.60320091 | 23.83730507 | 23.8839016  | 20.63412666 |
| 23.89633751 | 23.91597557 | 23.82493019 | 24.13218307 |
| 25.28104019 | 25.81697273 | 25.54760361 | 25.79647255 |
| 23.69890594 | 23.68816566 | 23.96305275 | 23.81362534 |
| 24.82653236 | 25.47299004 | 24.84632492 | 24.80104446 |
| 23.52061272 | 24.08488846 | 23.78026581 | 23.57103157 |
| 23.39375114 | 22.10395622 | 23.40314674 | 23.58852196 |
| 25.28068542 | 24.87549019 | 25.31627464 | 25.23436356 |
| 26.59063721 | 26.64223671 | 26.50089264 | 26.71868706 |



|             |             |             |             |
|-------------|-------------|-------------|-------------|
| 26.68244362 | 26.71187782 | 26.62603188 | 26.67492104 |
| 23.60002899 | 23.25983047 | 23.17622757 | 23.27213097 |
| 22.79512978 | 19.45071602 | 21.6439743  | 22.647089   |
| 25.85851669 | 26.39288521 | 26.2281723  | 26.30307579 |
| 23.9401989  | 23.51965332 | 23.83238792 | 23.38942528 |
| 24.22192001 | 24.66757774 | 24.42348671 | 24.00641632 |
| 19.77803612 | 22.18504333 | 21.82380486 | 21.89063454 |
| 22.98139191 | 22.86304283 | 23.23334694 | 20.97164345 |
| 23.23344803 | 22.92627525 | 22.91557503 | 22.51816559 |
| 24.47456932 | 24.59451485 | 24.36792946 | 24.6390934  |
| 29.24392891 | 28.56125259 | 28.67781448 | 28.83010864 |
| 27.01956177 | 26.91934395 | 27.65095711 | 27.10109329 |
| 30.28040695 | 30.29395103 | 30.39304733 | 30.25900841 |
| 27.66769981 | 27.53504562 | 27.34460449 | 27.40770721 |
| 27.75906944 | 27.72364235 | 26.47456932 | 26.57379341 |
| 25.81276894 | 26.15077591 | 25.4376812  | 25.84033394 |
| 24.03263092 | 23.47803116 | 23.77293777 | 23.97228622 |
| 26.82784081 | 27.21743393 | 27.55713081 | 27.43284798 |
| 21.23853111 | 22.47511482 | 21.76349449 | 20.36923027 |
| 23.45085907 | 22.7135582  | 20.14275932 | 19.34421349 |
| 23.66079521 | 23.16060257 | 20.32252121 | 22.85205269 |
| 24.76724052 | 24.87937546 | 24.4534359  | 24.52240944 |
| 27.01265335 | 27.10908699 | 27.05569077 | 27.34282494 |
| 27.00474548 | 27.26633263 | 26.68471909 | 27.10998535 |
| 30.23214912 | 30.0811882  | 29.90210533 | 29.85996819 |
| 26.64485168 | 26.86159706 | 26.19494057 | 26.81323242 |
| 30.23591995 | 30.09973907 | 29.92464828 | 29.86697006 |
| 26.57460213 | 26.37721252 | 26.479496   | 26.15052414 |
| 24.95637512 | 24.09956932 | 23.92687225 | 24.3064003  |
| 22.0274601  | 22.31221581 | 22.25675392 | 22.39160347 |
| 22.56232262 | 22.74568748 | 22.7861824  | 22.71137428 |
| 24.6047287  | 25.01818275 | 24.5146656  | 24.91333008 |
| 23.13473892 | 23.48787498 | 22.78769684 | 22.71000862 |
| 23.68099594 | 24.41125107 | 19.84072685 | 24.24030876 |
| 23.62611389 | 23.56104088 | 23.57230568 | 23.60104942 |
| 23.351511   | 23.50930023 | 23.46762085 | 23.76304054 |
| 24.10549545 | 23.91798019 | 24.00195885 | 24.00829887 |
| 24.84182167 | 24.0284214  | 24.4236145  | 24.02233696 |
| 23.74488831 | 23.80045319 | 24.03598976 | 23.51568985 |
| 25.48234558 | 25.89407158 | 25.72985268 | 25.78949928 |
| 21.18303108 | 23.79639816 | 23.51749229 | 20.29961014 |

|             |             |             |             |
|-------------|-------------|-------------|-------------|
| 20.31178284 | 21.68761063 | 21.48910141 | 22.00408554 |
| 24.51977348 | 24.48873329 | 21.15223885 | 24.54185486 |
| 23.17205048 | 22.83261871 | 23.00087547 | 22.76595688 |
| 25.91818428 | 26.12935448 | 26.20895767 | 26.03462601 |
| 22.62678337 | 22.71066093 | 21.02049637 | 22.19318962 |
| 24.78750801 | 25.14055443 | 24.94908905 | 25.03653336 |
| 23.45625877 | 24.34671783 | 23.70081139 | 23.98745918 |
| 23.16098785 | 23.56034279 | 23.42136765 | 23.26685143 |
| 27.4354744  | 27.25457764 | 27.13741112 | 27.13388824 |
| 25.41786385 | 25.86424446 | 25.47376442 | 25.43644333 |
| 19.67462158 | 22.47822762 | 22.3235836  | 22.51948547 |
| 26.42439842 | 26.29496765 | 26.73750496 | 26.34480667 |
| 24.03841972 | 24.58250618 | 24.54668999 | 24.37537384 |
| 21.01194    | 19.59996033 | 21.14939499 | 22.17449379 |
| 20.78949738 | 20.254673   | 23.03630829 | 22.9955368  |
| 23.63344955 | 23.92061615 | 23.67626762 | 23.50142479 |
| 22.89653969 | 21.6573925  | 22.08125114 | 22.10325623 |
| 22.78380775 | 22.60751915 | 22.33279037 | 22.57036018 |
| 24.15522194 | 24.36699677 | 24.19902992 | 24.06414604 |
| 22.3273716  | 23.17747498 | 22.80153847 | 22.82582283 |
| 22.66075134 | 22.99284363 | 22.2401619  | 19.53779984 |
| 25.44366837 | 25.68992424 | 25.41934395 | 25.52025414 |
| 26.38937569 | 26.20659447 | 27.36977768 | 26.43318367 |
| 27.07469749 | 27.25250435 | 28.41453743 | 27.50241089 |
| 25.25403786 | 25.4611702  | 25.51671219 | 25.10773087 |
| 20.37851524 | 22.78122711 | 23.32978249 | 23.0077858  |
| 19.89686775 | 22.73945999 | 22.68500137 | 22.50280762 |
| 23.77323914 | 23.82357025 | 23.65719986 | 23.6482296  |
| 26.77165413 | 27.13104439 | 27.02326775 | 26.75442696 |
| 22.40784645 | 22.51270294 | 22.7457695  | 22.50443459 |
| 23.33169746 | 23.8646698  | 23.38824272 | 23.621315   |
| 26.19914246 | 26.42958069 | 25.82281685 | 26.37757683 |
| 25.07798004 | 24.84182167 | 24.5892086  | 24.77182961 |
| 22.27605629 | 21.87526512 | 21.495821   | 19.4026413  |
| 25.82570648 | 25.70740891 | 25.47367096 | 25.49390221 |
| 24.68356705 | 25.17451477 | 24.86301613 | 25.05631065 |
| 23.29193306 | 23.39741325 | 23.69901085 | 21.11107445 |
| 23.14374924 | 23.06958008 | 23.04385185 | 20.83472252 |
| 25.94639206 | 25.79501152 | 25.48394585 | 25.56281853 |
| 33.49964523 | 33.48615646 | 33.38638306 | 33.05796814 |
| 26.19689369 | 25.71164322 | 25.64913559 | 25.40574455 |

|             |             |             |             |
|-------------|-------------|-------------|-------------|
| 26.47201347 | 26.61848831 | 26.72871208 | 26.59348869 |
| 24.25601959 | 24.67454529 | 24.84162903 | 24.29516029 |
| 26.09679794 | 26.15133667 | 26.22486496 | 25.83701515 |
| 24.32505417 | 24.87638092 | 24.58193016 | 24.51839256 |
| 19.4693222  | 21.48374939 | 21.22396278 | 21.3355999  |
| 21.50770378 | 22.03264618 | 21.02093124 | 21.77406502 |
| 22.87915993 | 22.96761513 | 23.19819069 | 23.04348373 |
| 24.16077232 | 23.28263092 | 24.54816246 | 24.14429283 |
| 24.92075348 | 25.25842857 | 25.13414383 | 25.36362648 |
| 20.76157951 | 21.47357941 | 21.72304916 | 22.12439346 |
| 27.12287521 | 27.36994553 | 27.41506195 | 27.31155396 |
| 27.19629288 | 27.54701424 | 27.21845055 | 27.04718399 |
| 30.88656425 | 30.34456253 | 30.70882416 | 30.86540604 |
| 30.65411949 | 30.87598801 | 30.757164   | 30.64375114 |
| 29.17085648 | 29.41719627 | 28.81243706 | 29.04723549 |
| 30.1740284  | 29.99604225 | 29.99698448 | 30.08017159 |
| 20.19186211 | 23.89772224 | 20.73615456 | 24.02267647 |
| 26.23668098 | 25.93098259 | 25.96543121 | 26.52327728 |
| 21.33832359 | 23.00264549 | 22.97200584 | 22.14563179 |
| 25.91026688 | 26.54891205 | 26.26054955 | 25.91472244 |
| 25.06274605 | 24.051754   | 23.72587967 | 25.18831444 |
| 22.02201462 | 22.21495628 | 22.58093071 | 22.2194252  |
| 21.31224251 | 21.72263336 | 22.05212021 | 21.89611435 |
| 23.35164642 | 23.86731148 | 23.31229782 | 23.83951759 |
| 29.90210533 | 30.03734589 | 30.07111931 | 30.03551102 |
| 24.34638023 | 23.32745361 | 24.29698181 | 23.89707565 |
| 29.99590683 | 29.65688324 | 29.94642639 | 29.89172935 |
| 33.22705078 | 33.2937851  | 33.12646484 | 33.12709427 |
| 24.7565918  | 25.09932709 | 24.45669746 | 24.83426857 |
| 21.95290565 | 22.80120277 | 20.36507988 | 22.76931    |
| 25.8490963  | 25.78179359 | 25.84871292 | 25.75839615 |
| 24.67642975 | 25.12269783 | 25.20448685 | 24.89518166 |
| 23.02681732 | 19.491045   | 23.03513336 | 23.46500778 |
| 24.6552906  | 24.49582481 | 25.2540741  | 18.9473896  |
| 20.97771072 | 21.7735424  | 21.62609291 | 21.22169876 |
| 27.57520866 | 27.9681263  | 27.64278793 | 27.75964165 |
| 22.223526   | 20.75802612 | 22.2930851  | 22.51722908 |
| 25.3213768  | 25.48200798 | 23.98875809 | 25.45117378 |
| 27.43714142 | 27.56165314 | 27.48523712 | 27.30042458 |
| 23.24115181 | 23.47543526 | 23.72577667 | 23.92379379 |
| 23.15744591 | 22.33696175 | 22.30641174 | 22.47988129 |

|             |             |             |             |
|-------------|-------------|-------------|-------------|
| 27.55362129 | 26.69458199 | 27.02305603 | 26.59590912 |
| 22.69981575 | 22.80481148 | 22.35995293 | 22.67219353 |
| 23.01205635 | 24.23491096 | 23.50809097 | 23.91077042 |
| 20.79994011 | 20.85946465 | 21.33570862 | 21.13131905 |
| 22.24057007 | 22.83178902 | 22.56841278 | 22.20580101 |
| 23.17423248 | 23.99118423 | 22.45530701 | 22.71055412 |
| 21.60819626 | 22.30069923 | 21.55102921 | 22.17319489 |
| 24.99727058 | 25.26495743 | 25.0507164  | 25.0370369  |
| 22.7842865  | 23.33946419 | 22.70737839 | 20.54440117 |
| 23.77525139 | 24.19166946 | 24.58657646 | 24.09466553 |
| 27.19760513 | 27.53110886 | 27.05672455 | 27.16009903 |
| 22.51333046 | 22.86340332 | 22.11524582 | 22.37113762 |
| 23.90361786 | 24.42419052 | 24.59212112 | 24.85780525 |
| 23.6839962  | 22.81413269 | 23.07814217 | 22.79060364 |
| 22.84571266 | 23.57357597 | 23.03236198 | 22.97419548 |
| 23.97901917 | 24.53195763 | 24.06101608 | 23.89152336 |
| 26.30045891 | 26.14230728 | 26.40340614 | 26.22099686 |
| 24.22081375 | 24.55888367 | 24.26799393 | 24.0639801  |
| 24.08082771 | 22.03379059 | 20.07050896 | 22.81811905 |
| 22.04786682 | 20.80368233 | 19.53922272 | 22.15285873 |
| 22.76514626 | 23.39152527 | 22.88957596 | 23.38350487 |
| 21.3104229  | 20.93883514 | 21.76034927 | 21.82322121 |
| 19.47408104 | 22.19868469 | 22.90600586 | 22.23885155 |
| 25.02373314 | 25.33759499 | 25.25745773 | 25.11545181 |
| 29.60930634 | 29.44142342 | 29.69511223 | 29.51271248 |
| 30.23683167 | 29.9640274  | 29.86505318 | 29.47132874 |
| 28.90970612 | 28.52309036 | 28.51190186 | 28.50517845 |
| 26.67922401 | 26.79587936 | 26.34482384 | 26.51062775 |
| 24.97836494 | 25.25616264 | 25.20284462 | 24.92175102 |
| 20.88427544 | 21.20251656 | 21.24132729 | 20.47149658 |
| 28.38960648 | 27.85037231 | 28.05491447 | 27.99139977 |
| 22.33153343 | 23.74601555 | 22.90139198 | 23.89356232 |
| 19.50835609 | 21.63408661 | 21.4643116  | 20.66344643 |
| 27.13829041 | 26.54705811 | 26.6563549  | 26.64718819 |
| 22.2147789  | 21.25271606 | 20.64423752 | 22.36484909 |
| 20.89903259 | 20.63019753 | 21.02072716 | 21.22258186 |
| 23.25037766 | 23.338377   | 22.77122498 | 23.36532974 |
| 23.36959457 | 23.69667816 | 23.62332535 | 23.87041855 |
| 19.54990768 | 21.78364754 | 21.78962898 | 21.96564293 |
| 25.26638794 | 25.49960136 | 25.51926422 | 25.4331665  |
| 24.42046928 | 24.57380867 | 24.27070618 | 24.55203819 |

|             |             |             |             |
|-------------|-------------|-------------|-------------|
| 22.45978928 | 22.73169136 | 22.80291939 | 22.29902267 |
| 27.39083672 | 27.73892403 | 27.19441605 | 27.48623466 |
| 21.49580002 | 23.18383217 | 22.9560833  | 22.74794388 |
| 22.50203133 | 21.25896645 | 21.70893097 | 23.11133385 |
| 24.31485748 | 24.29698181 | 23.9762249  | 24.31858635 |
| 23.80134201 | 24.48456001 | 24.8579483  | 24.33210564 |
| 23.49326134 | 24.12581253 | 23.48000526 | 23.79074287 |
| 23.07892418 | 22.57272148 | 21.09002304 | 21.22557831 |
| 25.21563911 | 26.0424118  | 25.303545   | 25.89562035 |
| 24.45657158 | 24.17027855 | 23.86325073 | 24.19655609 |
| 21.06972694 | 22.47047997 | 21.68033028 | 21.36099434 |
| 23.85595322 | 24.24357986 | 24.286726   | 23.80675888 |
| 21.05663681 | 21.50305176 | 22.23401642 | 20.51499176 |
| 21.89241409 | 22.19607544 | 28.65625381 | 24.10309601 |
| 25.97701073 | 26.58477211 | 25.84579849 | 27.1662426  |
| 31.91441917 | 31.86919975 | 31.63573074 | 31.88983154 |
| 28.11505508 | 28.01680183 | 27.33330154 | 27.78225517 |
| 25.29006958 | 19.84587288 | 21.27707481 | 21.83877563 |
| 27.99927139 | 27.93292046 | 27.10309601 | 27.57492065 |
| 27.59981537 | 26.90161705 | 25.50536728 | 26.91444778 |
| 24.97460747 | 24.0886116  | 23.37384796 | 23.94172096 |
| 32.48423767 | 32.4078331  | 32.1448555  | 32.25959778 |
| 28.90293884 | 29.20394135 | 28.69544411 | 28.91424751 |
| 26.52324867 | 26.43130302 | 26.8256588  | 26.25466919 |
| 24.08845139 | 24.16614723 | 24.79382133 | 24.35803413 |
| 22.68307495 | 23.09026146 | 23.06096649 | 23.34380722 |
| 28.17930603 | 28.36339951 | 28.01345062 | 27.96724701 |
| 23.11074448 | 22.60480881 | 22.44500923 | 22.72945404 |
| 26.49970627 | 26.84050179 | 26.49952507 | 26.59761429 |
| 24.72463226 | 24.72946358 | 24.72629547 | 24.7166481  |
| 25.13339806 | 25.3398056  | 25.05796242 | 25.1898613  |
| 23.65600014 | 23.55637169 | 23.1463623  | 22.96907425 |
| 24.61621857 | 24.99834633 | 25.16150284 | 25.06698036 |
| 24.31465149 | 24.11981201 | 24.35635567 | 24.33401871 |
| 29.48788261 | 29.6454525  | 29.54708862 | 29.66346359 |
| 23.53931236 | 23.18785477 | 23.32141113 | 23.44505882 |
| 22.29367447 | 22.34405136 | 22.4925518  | 22.64638519 |
| 20.80204964 | 24.44474411 | 24.59251976 | 24.84436226 |
| 22.31942749 | 22.6717186  | 22.17752075 | 20.81557274 |
| 24.97097015 | 25.17447662 | 24.98428917 | 25.40995789 |
| 22.95336723 | 23.16184807 | 23.01277161 | 22.93416214 |

|             |             |             |             |
|-------------|-------------|-------------|-------------|
| 19.9637661  | 23.26456261 | 23.52097321 | 23.47815514 |
| 26.78469086 | 26.87349701 | 26.93089294 | 26.75557327 |
| 27.32483101 | 27.30877876 | 27.37152481 | 27.37077522 |
| 24.59366035 | 25.13531876 | 24.839468   | 24.60303116 |
| 29.18366623 | 29.09204483 | 29.51694489 | 29.64823341 |
| 20.81291962 | 21.48099136 | 21.77112579 | 22.95709419 |
| 20.72616005 | 20.39707184 | 21.99137306 | 21.57070732 |
| 20.66220856 | 19.27091217 | 20.13257599 | 20.0249939  |
| 24.17302704 | 23.9955883  | 23.44139099 | 24.11592865 |
| 22.81499481 | 22.84550095 | 22.50246811 | 22.60141182 |
| 23.62086868 | 23.98093796 | 23.62911987 | 23.73148537 |
| 23.04656792 | 23.19272232 | 22.14314079 | 23.51292038 |
| 22.97270584 | 23.19248199 | 22.94799423 | 20.26353455 |
| 27.98413658 | 27.39329338 | 26.97169304 | 27.35110664 |
| 19.26282501 | 23.12182045 | 22.79378128 | 19.69579887 |
| 27.221035   | 25.71730232 | 28.78587532 | 26.97738266 |
| 25.17455292 | 25.26942253 | 24.92877007 | 25.03565407 |
| 24.24713516 | 24.47617722 | 24.09055138 | 24.56685829 |
| 24.95495605 | 25.12864685 | 24.97731781 | 25.10325623 |
| 26.15174294 | 26.93145561 | 27.02643776 | 26.96013832 |
| 25.41963387 | 25.30945587 | 25.70675087 | 25.39424324 |
| 21.18058968 | 20.7981205  | 20.27788544 | 21.25488663 |
| 20.69845581 | 19.9288826  | 20.04427719 | 20.60068512 |
| 26.44550133 | 26.78705978 | 26.43278503 | 26.7565918  |
| 23.97814751 | 24.61941338 | 24.78121758 | 24.82410622 |
| 25.13953972 | 25.09675789 | 26.29804802 | 25.3660965  |
| 23.80538177 | 24.30904007 | 24.55718994 | 23.79788399 |
| 26.03256798 | 25.8490715  | 26.76963806 | 26.3372879  |
| 27.9749794  | 27.82753754 | 28.73805428 | 27.737957   |
| 28.58849335 | 28.44915962 | 29.3036499  | 28.49151993 |
| 26.48581886 | 26.65703773 | 27.58985138 | 26.84565544 |
| 24.87769127 | 24.08058357 | 25.19767952 | 24.247715   |
| 26.62435913 | 26.25340652 | 27.25574875 | 26.55900002 |
| 22.16207886 | 22.8392868  | 22.85500336 | 22.46819305 |
| 21.60154724 | 20.99997711 | 22.60952759 | 22.09526062 |
| 24.13288879 | 24.44151688 | 24.74473381 | 24.37967682 |
| 24.328619   | 24.90320396 | 24.41383553 | 24.97936821 |
| 20.59577751 | 20.90749168 | 17.56340218 | 20.97554207 |
| 25.3475647  | 25.69224167 | 25.25810623 | 25.14386559 |
| 19.60431099 | 23.29319572 | 23.72930717 | 24.25796127 |
| 26.58132744 | 26.57474709 | 26.60300255 | 26.56537819 |

|             |             |             |             |
|-------------|-------------|-------------|-------------|
| 22.71129036 | 22.41735649 | 23.12265778 | 23.61503983 |
| 20.12098122 | 20.79249191 | 20.75238037 | 21.43338966 |
| 24.89360809 | 25.26831627 | 25.07398224 | 25.23022652 |
| 25.01239586 | 24.11100006 | 24.43154144 | 24.4810524  |
| 25.53611374 | 25.90435219 | 25.51065826 | 26.18557739 |
| 20.79082298 | 23.18251419 | 22.41586113 | 22.39576721 |
| 27.0142498  | 27.02633286 | 26.86903    | 26.8260231  |
| 28.26954651 | 28.46832085 | 28.06661034 | 28.19422722 |
| 22.92603874 | 21.43613815 | 22.50448799 | 21.47045517 |
| 23.09709549 | 23.22166824 | 22.55782127 | 22.91708755 |
| 28.56398201 | 28.65550232 | 28.49392509 | 28.2938633  |
| 32.97481918 | 32.87111282 | 32.79656601 | 32.66139984 |
| 29.42606354 | 29.49838448 | 29.40584183 | 29.31133652 |
| 28.32641792 | 28.32487297 | 28.49830818 | 28.36623764 |
| 27.06394005 | 27.18905067 | 27.26257515 | 27.08972359 |
| 25.52710152 | 25.47351646 | 25.20108795 | 25.18974876 |
| 34.64656448 | 34.51747131 | 34.30259705 | 34.21277237 |
| 23.51689148 | 21.30016327 | 20.95811272 | 20.36219978 |
| 21.51431656 | 22.02914619 | 21.60724831 | 21.7474308  |
| 24.02766228 | 24.35198402 | 24.01682281 | 24.02647972 |
| 22.79165649 | 23.16373825 | 22.85684586 | 22.69436455 |
| 22.96022606 | 22.16109467 | 21.46921158 | 21.60480881 |
| 25.09414101 | 25.90747452 | 25.09551048 | 25.34722519 |
| 20.35221481 | 20.33810616 | 20.79352379 | 21.57070732 |
| 21.88378143 | 23.33960152 | 19.57968712 | 22.63092041 |
| 21.68940163 | 22.39653206 | 21.84249306 | 21.97589302 |
| 19.98628426 | 22.22829056 | 22.20137978 | 22.35277748 |
| 24.9039402  | 25.44682693 | 25.15699768 | 25.26602936 |
| 22.49916267 | 22.50266266 | 22.19312859 | 22.44126511 |
| 25.92795753 | 25.99933624 | 26.0062027  | 25.9615078  |
| 26.38558006 | 26.30086136 | 25.02398682 | 26.21326637 |
| 25.85697556 | 25.6768589  | 25.49484825 | 25.42294121 |
| 27.64574623 | 27.16480446 | 26.64388847 | 26.32757378 |
| 22.66793442 | 22.15340614 | 22.12660027 | 22.77802086 |
| 26.93719292 | 27.08547592 | 26.9096489  | 27.15711403 |
| 24.97355652 | 24.92899704 | 24.85267067 | 24.66008759 |
| 22.97139168 | 23.65839958 | 22.88451767 | 22.16729546 |
| 29.26613235 | 29.22184181 | 29.25520897 | 29.23343086 |
| 20.36672211 | 21.42837143 | 23.53148079 | 22.26001358 |
| 23.07471657 | 23.6037674  | 23.30716324 | 24.01860619 |
| 27.87952614 | 27.85828018 | 27.37393188 | 27.5480442  |

|             |             |             |             |
|-------------|-------------|-------------|-------------|
| 26.84852219 | 26.90517998 | 26.87865067 | 26.73324394 |
| 23.3329258  | 24.06472015 | 23.9724617  | 23.80153847 |
| 25.5480442  | 25.6672802  | 25.74131775 | 25.6894455  |
| 21.96666527 | 21.83580208 | 22.93158722 | 20.85542488 |
| 24.27838326 | 24.88418198 | 23.52001381 | 24.47988129 |
| 21.95248032 | 21.03830147 | 22.15803909 | 21.5694313  |
| 22.6167469  | 22.27775955 | 22.15322876 | 22.72833252 |
| 22.85008812 | 23.824543   | 22.96040344 | 23.31838036 |
| 27.88843918 | 27.14024162 | 27.56019592 | 27.54855919 |
| 28.44971085 | 28.05940819 | 28.17455292 | 28.3862381  |
| 28.04400826 | 27.77467346 | 27.81311035 | 28.4438343  |
| 25.7888279  | 25.77705956 | 25.72171593 | 26.3173275  |
| 28.74287987 | 28.69839478 | 29.02056885 | 29.0350399  |
| 30.24671745 | 30.00410271 | 30.12706375 | 30.15870285 |
| 23.9331913  | 24.17447662 | 24.57114792 | 23.87389565 |
| 20.55618477 | 21.79499245 | 20.49365234 | 20.74657059 |
| 19.29526711 | 19.56874275 | 20.66718483 | 22.09351349 |
| 23.44859314 | 23.05417442 | 22.37618256 | 22.79159737 |
| 21.89759254 | 20.66702843 | 21.01522446 | 21.14419937 |
| 29.87686539 | 30.22377586 | 29.90023613 | 29.76602364 |



sents Label-free Quantification values generated by MaxQuant.

| Log2(LFQ Col8+/_3) | Log2(LFQ Col8+/_4) | Peptides | Unique peptides | Sequence coverage [%] |
|--------------------|--------------------|----------|-----------------|-----------------------|
| 20.13005829        | 20.24832344        | 2        | 2               | 7.6                   |
| 20.74559402        | 20.52244377        | 1        | 1               | 5.7                   |
| 20.81119537        | 23.02213478        | 2        | 2               | 7.7                   |
| 18.60058594        | 21.58037949        | 2        | 2               | 3.6                   |
| 20.83017159        | 20.42439079        | 1        | 1               | 3.5                   |
| 20.35355377        | 22.50915527        | 3        | 3               | 6.2                   |
| 20.7847538         | 22.23022652        | 1        | 1               | 6.8                   |
| 20.9280777         | 18.78753853        | 1        | 1               | 5.5                   |
| 22.66016388        | 21.43086433        | 3        | 3               | 10.9                  |
| 21.3584938         | 21.2183876         | 3        | 3               | 7.1                   |
| 20.07580185        | 20.46037292        | 2        | 2               | 7.7                   |
| 22.21859741        | 20.99541664        | 2        | 2               | 12.8                  |
| 25.77532578        | 26.14557648        | 11       | 1               | 78.1                  |
| 27.89856339        | 28.94673347        | 4        | 4               | 72.2                  |
| 22.02536583        | 22.48706627        | 4        | 4               | 7.6                   |
| 22.34754372        | 20.92611313        | 2        | 2               | 4.4                   |
| 26.87490463        | 27.66309166        | 1        | 1               | 8.7                   |
| 24.59423065        | 25.62745094        | 10       | 10              | 22.9                  |
| 29.44268799        | 29.40346718        | 46       | 46              | 39.6                  |
| 26.203125          | 26.36157036        | 21       | 16              | 54.2                  |
| 22.95052338        | 23.19877434        | 2        | 2               | 8.6                   |
| 22.8434906         | 22.43321228        | 3        | 3               | 16.9                  |
| 24.93075752        | 25.01788521        | 7        | 7               | 40.7                  |
| 23.87220573        | 23.90802383        | 3        | 3               | 16.5                  |
| 24.31955147        | 24.28171158        | 6        | 3               | 17.3                  |
| 25.15734482        | 24.5952549         | 5        | 5               | 17.9                  |
| 24.48664856        | 24.94650459        | 5        | 5               | 7                     |
| 24.14452744        | 24.40295029        | 2        | 2               | 3.5                   |
| 27.27559853        | 27.32345581        | 15       | 15              | 32.7                  |
| 23.51581001        | 23.38653374        | 3        | 3               | 5.1                   |
| 27.15769196        | 26.8707943         | 19       | 19              | 25.4                  |
| 25.3012104         | 25.43631554        | 15       | 15              | 12.3                  |
| 24.42040443        | 24.94677162        | 1        | 1               | 39.7                  |
| 22.7152977         | 22.6591835         | 2        | 2               | 13.2                  |
| 25.07496262        | 25.23209572        | 17       | 3               | 44.3                  |
| 23.76324272        | 23.27951813        | 6        | 6               | 8.2                   |
| 25.23187447        | 25.05105019        | 10       | 10              | 13.7                  |

|             |             |    |    |      |
|-------------|-------------|----|----|------|
| 24.67125511 | 24.94828796 | 5  | 5  | 29.5 |
| 25.18959808 | 25.14518738 | 13 | 4  | 16.7 |
| 29.74927139 | 29.7671299  | 53 | 45 | 33.6 |
| 32.46630859 | 32.31985474 | 55 | 2  | 66.2 |
| 25.070261   | 25.03573799 | 10 | 10 | 25.9 |
| 24.42278099 | 24.81972694 | 5  | 5  | 21.7 |
| 29.08618355 | 29.284935   | 7  | 7  | 39.8 |
| 29.64233971 | 29.66991425 | 19 | 19 | 19.5 |
| 26.8292923  | 26.73698997 | 12 | 12 | 28   |
| 22.82148933 | 22.6990757  | 4  | 3  | 19   |
| 28.20097542 | 28.15576363 | 14 | 13 | 57   |
| 27.1848011  | 27.03160095 | 7  | 7  | 30.4 |
| 26.07795906 | 25.81360054 | 9  | 9  | 32.1 |
| 26.65962601 | 26.79587936 | 13 | 13 | 28   |
| 28.77555275 | 28.69832993 | 27 | 27 | 41.8 |
| 29.61999321 | 29.37819672 | 29 | 29 | 39.8 |
| 25.08476639 | 25.05796242 | 8  | 8  | 42.2 |
| 25.84256554 | 26.02772522 | 8  | 8  | 25.9 |
| 25.88925171 | 26.08401489 | 5  | 5  | 71.3 |
| 28.18905067 | 28.01403618 | 22 | 22 | 24.1 |
| 31.87125778 | 31.5801506  | 25 | 25 | 76.8 |
| 24.97079468 | 25.04551888 | 5  | 3  | 24.8 |
| 24.92705345 | 25.05924225 | 3  | 3  | 56.9 |
| 30.94928169 | 30.75914955 | 16 | 16 | 44.7 |
| 26.14172363 | 26.0161438  | 12 | 11 | 35.9 |
| 30.22227859 | 30.20780945 | 17 | 17 | 56.1 |
| 28.67865372 | 28.50260162 | 70 | 57 | 37   |
| 26.25279236 | 26.5917778  | 3  | 3  | 36.4 |
| 32.0824585  | 32.14135742 | 42 | 42 | 40.1 |
| 31.95265198 | 31.80624199 | 20 | 19 | 61.8 |
| 32.40509796 | 32.26857758 | 46 | 46 | 51.9 |
| 33.14176941 | 32.92406464 | 22 | 20 | 91   |
| 29.30112267 | 29.38055229 | 18 | 18 | 54.2 |
| 24.8472805  | 24.77826309 | 5  | 5  | 14.6 |
| 29.41266251 | 29.32029533 | 22 | 22 | 71.1 |
| 24.67055321 | 24.84665871 | 3  | 3  | 3.5  |
| 29.32964897 | 29.30893135 | 27 | 27 | 36.5 |
| 28.43328667 | 28.46166229 | 14 | 14 | 32.2 |
| 28.85156441 | 28.73615074 | 31 | 31 | 38.2 |
| 26.49798775 | 26.40896988 | 16 | 16 | 29.5 |
| 32.05717468 | 32.04074478 | 73 | 44 | 78.6 |

|             |             |    |    |      |
|-------------|-------------|----|----|------|
| 29.75585938 | 29.68695641 | 25 | 21 | 62.8 |
| 28.3506012  | 28.31893921 | 14 | 14 | 23.4 |
| 26.46062469 | 26.28630257 | 10 | 9  | 18.5 |
| 31.9971199  | 32.12234879 | 26 | 26 | 73.2 |
| 28.65853691 | 28.5903511  | 46 | 46 | 29.2 |
| 30.90727234 | 30.69145584 | 26 | 26 | 20.1 |
| 24.82847023 | 24.85965538 | 5  | 5  | 13.6 |
| 30.67092705 | 30.61386108 | 16 | 16 | 40.6 |
| 25.58385468 | 25.44518471 | 6  | 6  | 22.1 |
| 32.1676445  | 32.2407341  | 41 | 0  | 92   |
| 27.72214508 | 27.84667206 | 13 | 13 | 53.2 |
| 29.85660362 | 29.78507996 | 15 | 7  | 95.7 |
| 29.39674759 | 29.3693409  | 24 | 24 | 44.7 |
| 26.37414742 | 26.43744278 | 11 | 11 | 33.4 |
| 27.6776123  | 27.60780716 | 13 | 13 | 51.1 |
| 27.89186096 | 28.01781082 | 6  | 6  | 49   |
| 32.16230774 | 32.10771179 | 22 | 13 | 81.2 |
| 27.03653336 | 26.94793129 | 20 | 20 | 29.3 |
| 31.04283524 | 31.15273285 | 25 | 25 | 73.7 |
| 25.55677986 | 25.55666351 | 10 | 10 | 49.5 |
| 27.0048542  | 27.22701645 | 7  | 7  | 34.7 |
| 24.62527847 | 24.80094719 | 1  | 1  | 10.6 |
| 27.44213486 | 27.38599205 | 8  | 8  | 16.7 |
| 27.0212574  | 26.85483742 | 16 | 16 | 18   |
| 29.6585865  | 29.64593506 | 15 | 15 | 73.4 |
| 23.75052071 | 23.5985527  | 3  | 3  | 8.6  |
| 26.27602386 | 26.38315964 | 9  | 8  | 37.5 |
| 29.83540535 | 29.75054932 | 19 | 19 | 48.8 |
| 28.38964653 | 28.34912491 | 24 | 24 | 45.7 |
| 26.20560646 | 26.09657669 | 8  | 7  | 53.5 |
| 25.32892609 | 25.66193771 | 4  | 4  | 44.7 |
| 24.98819542 | 25.38442802 | 10 | 10 | 6    |
| 26.62936974 | 26.43855476 | 13 | 13 | 45   |
| 24.39159012 | 24.46836662 | 5  | 5  | 4.3  |
| 24.71816444 | 24.90651131 | 3  | 3  | 6.9  |
| 24.14476013 | 23.89485741 | 2  | 2  | 11.9 |
| 26.96035957 | 27.12356567 | 16 | 16 | 28.5 |
| 22.66773987 | 22.47901917 | 5  | 3  | 19.2 |
| 23.78815651 | 23.92687225 | 4  | 4  | 5.1  |
| 25.77301407 | 25.93213272 | 9  | 9  | 30.8 |
| 23.8292923  | 24.08739853 | 6  | 5  | 15.6 |

|             |             |    |    |      |
|-------------|-------------|----|----|------|
| 25.64088631 | 25.6284256  | 10 | 10 | 23.3 |
| 26.56072044 | 26.74599075 | 9  | 9  | 20.7 |
| 24.88743973 | 24.93907738 | 6  | 5  | 14.4 |
| 27.13025856 | 27.0378952  | 15 | 15 | 39.4 |
| 27.15595627 | 27.17121506 | 8  | 8  | 40.2 |
| 24.35568428 | 24.37782478 | 7  | 4  | 4.5  |
| 25.81426048 | 25.51292038 | 8  | 8  | 40.9 |
| 23.72826958 | 23.62722778 | 2  | 2  | 21.8 |
| 25.75842285 | 26.17518044 | 2  | 2  | 24.2 |
| 20.99886322 | 20.98168755 | 1  | 1  | 1.9  |
| 28.0175457  | 27.85554886 | 4  | 4  | 47.6 |
| 27.60498428 | 27.5060482  | 13 | 13 | 16.1 |
| 24.94565582 | 24.72416306 | 3  | 2  | 10.9 |
| 26.82189369 | 26.69351959 | 9  | 9  | 5.9  |
| 24.41209221 | 24.86792374 | 7  | 7  | 7.9  |
| 24.47889519 | 24.77971649 | 6  | 6  | 20.6 |
| 23.60433388 | 23.77031898 | 4  | 4  | 14.1 |
| 25.77152824 | 25.80015564 | 4  | 4  | 25.2 |
| 27.830019   | 28.29171371 | 9  | 9  | 50.8 |
| 25.46220207 | 25.67066002 | 4  | 4  | 19.6 |
| 26.23344803 | 25.77482414 | 6  | 6  | 39.1 |
| 24.10181427 | 23.7850647  | 5  | 5  | 7.4  |
| 20.65848732 | 20.95539093 | 1  | 1  | 0.6  |
| 23.43618965 | 23.56150818 | 2  | 2  | 2.7  |
| 25.25259399 | 24.83893967 | 6  | 6  | 30.3 |
| 20.88539314 | 20.25660896 | 1  | 1  | 16.4 |
| 24.08204651 | 23.45199013 | 6  | 6  | 14.4 |
| 22.43260002 | 21.90683174 | 1  | 1  | 1    |
| 25.24557686 | 25.76638031 | 9  | 9  | 26.8 |
| 25.2257843  | 24.86178589 | 7  | 7  | 18.7 |
| 20.43481636 | 20.27264404 | 1  | 1  | 13   |
| 25.35289192 | 25.80815887 | 6  | 6  | 21.3 |
| 21.97816467 | 21.56620789 | 1  | 1  | 4.4  |
| 23.10304832 | 22.59128761 | 1  | 1  | 4.8  |
| 25.30608559 | 24.3617878  | 11 | 11 | 16.9 |
| 21.52497101 | 21.62497711 | 1  | 1  | 8.5  |
| 29.76086235 | 28.92668533 | 6  | 1  | 19.4 |
| 21.80025482 | 21.11343384 | 1  | 1  | 3.8  |
| 21.96409225 | 21.33663559 | 1  | 1  | 23.3 |
| 23.1590786  | 23.1245842  | 1  | 1  | 24.8 |
| 27.87367249 | 28.18413925 | 10 | 10 | 28.4 |

|             |             |    |    |      |
|-------------|-------------|----|----|------|
| 22.33881187 | 22.73952103 | 1  | 1  | 3.3  |
| 20.52267265 | 20.40478325 | 1  | 1  | 7.4  |
| 22.50847816 | 21.15127945 | 1  | 1  | 0.7  |
| 24.78256798 | 24.4795742  | 1  | 1  | 1.1  |
| 21.77344894 | 21.8398056  | 2  | 2  | 4.4  |
| 22.12965393 | 20.88639641 | 1  | 1  | 1.6  |
| 23.73106956 | 24.22663116 | 3  | 3  | 8.7  |
| 23.73448563 | 23.13505173 | 16 | 3  | 33.3 |
| 23.53171921 | 23.91497231 | 8  | 8  | 4.3  |
| 22.86974144 | 21.11162949 | 1  | 1  | 8.8  |
| 23.55999184 | 23.37623596 | 1  | 1  | 1.9  |
| 25.27280807 | 24.49643517 | 17 | 2  | 53.5 |
| 25.63768387 | 25.84830856 | 2  | 2  | 34.7 |
| 25.08982468 | 25.25432587 | 2  | 2  | 13.1 |
| 25.73448563 | 24.63212013 | 2  | 2  | 48.3 |
| 30.04544067 | 29.92874718 | 35 | 35 | 36.7 |
| 25.30803299 | 25.24612045 | 5  | 5  | 8.2  |
| 21.12300491 | 22.29246712 | 1  | 1  | 2.7  |
| 24.69205475 | 24.34387589 | 4  | 4  | 12.8 |
| 22.48944473 | 21.8386898  | 2  | 2  | 1.9  |
| 23.12090302 | 21.93668175 | 4  | 4  | 3.8  |
| 23.44897079 | 23.45211601 | 3  | 3  | 6.8  |
| 23.29319572 | 23.13252831 | 3  | 3  | 11   |
| 21.53886414 | 21.87942123 | 1  | 1  | 1.2  |
| 24.09256935 | 23.9616394  | 3  | 3  | 25.4 |
| 24.80198288 | 24.56383705 | 6  | 6  | 21.6 |
| 24.92456436 | 24.98789215 | 6  | 5  | 11.3 |
| 23.55015945 | 23.85081291 | 3  | 3  | 17.9 |
| 23.47963524 | 20.32868004 | 3  | 3  | 9.5  |
| 20.84796524 | 21.40254784 | 1  | 1  | 2.2  |
| 25.58471489 | 25.34207916 | 4  | 4  | 77.8 |
| 25.82946205 | 25.99899292 | 5  | 5  | 22.9 |
| 29.73201561 | 29.27186394 | 28 | 28 | 83.1 |
| 25.02820969 | 25.90055847 | 39 | 36 | 24   |
| 22.12155151 | 21.59545898 | 3  | 3  | 3.9  |
| 24.00453186 | 23.75542068 | 2  | 2  | 5.8  |
| 28.89431953 | 28.71986198 | 21 | 21 | 45.3 |
| 28.85117722 | 28.61589622 | 14 | 14 | 43.7 |
| 27.37550735 | 27.27710724 | 12 | 12 | 47.8 |
| 25.67411423 | 25.69112396 | 6  | 6  | 18.5 |
| 28.52223015 | 28.25822258 | 38 | 38 | 74.5 |

|             |             |    |    |      |
|-------------|-------------|----|----|------|
| 27.60865402 | 26.19852448 | 20 | 20 | 11.4 |
| 29.17921066 | 29.16180611 | 15 | 15 | 55.4 |
| 25.25125885 | 25.73169136 | 7  | 7  | 29.7 |
| 22.94970512 | 22.65066528 | 3  | 3  | 8    |
| 28.06635475 | 28.13887596 | 33 | 33 | 40.1 |
| 26.44262505 | 26.72806168 | 17 | 17 | 32.3 |
| 30.26918983 | 29.96333885 | 44 | 44 | 65.4 |
| 24.34962273 | 23.62310219 | 3  | 3  | 36.4 |
| 25.19069099 | 25.41641617 | 8  | 4  | 29.4 |
| 22.79520988 | 23.31713676 | 2  | 2  | 6.5  |
| 26.48658752 | 26.60554886 | 12 | 12 | 29.6 |
| 25.07062912 | 25.11692047 | 3  | 3  | 20.3 |
| 22.15533066 | 22.54722023 | 4  | 4  | 10.1 |
| 21.44129562 | 20.38448143 | 1  | 1  | 3.4  |
| 28.4814682  | 28.46653366 | 26 | 25 | 39.9 |
| 21.07759476 | 21.27957344 | 8  | 7  | 17.9 |
| 27.36076546 | 27.3554821  | 37 | 1  | 92.3 |
| 35.33314896 | 35.33504486 | 43 | 0  | 92   |
| 33.46963501 | 33.50923157 | 37 | 1  | 92.3 |
| 23.13653946 | 23.08342743 | 2  | 2  | 6.1  |
| 29.15056801 | 29.25554657 | 68 | 41 | 75.3 |
| 23.53564072 | 23.73096657 | 2  | 2  | 9.6  |
| 24.7470417  | 24.63128662 | 13 | 4  | 45.5 |
| 27.22940254 | 27.1268177  | 13 | 4  | 45.2 |
| 28.0525322  | 28.22283173 | 15 | 15 | 51.8 |
| 29.43483734 | 29.47309113 | 16 | 16 | 63.9 |
| 23.64636421 | 24.28792381 | 3  | 3  | 28.3 |
| 20.99920654 | 21.02857208 | 1  | 1  | 1.6  |
| 20.65880203 | 23.23928833 | 2  | 2  | 2.2  |
| 24.73866653 | 24.21726608 | 8  | 8  | 17.7 |
| 25.44189835 | 24.96899414 | 6  | 5  | 6.7  |
| 20.22021103 | 21.12009621 | 2  | 1  | 3    |
| 23.47072792 | 23.60501099 | 3  | 3  | 7.7  |
| 26.75404358 | 26.9617939  | 11 | 10 | 57   |
| 20.46800995 | 24.87652016 | 6  | 5  | 20.6 |
| 24.94252777 | 25.16088676 | 3  | 3  | 13.8 |
| 26.08873367 | 25.97083855 | 7  | 7  | 28.8 |
| 21.73007584 | 21.56857681 | 2  | 2  | 8.1  |
| 21.61997223 | 21.68616486 | 2  | 2  | 2.9  |
| 19.13703918 | 21.75767899 | 1  | 1  | 3.7  |
| 25.35753059 | 25.48114586 | 11 | 11 | 33.9 |

|             |             |    |    |      |
|-------------|-------------|----|----|------|
| 22.34258842 | 21.90455437 | 2  | 2  | 7.2  |
| 22.68833542 | 21.82403755 | 3  | 2  | 4.1  |
| 20.57975769 | 20.14071083 | 1  | 1  | 6    |
| 23.38363647 | 23.7207756  | 1  | 1  | 14.5 |
| 23.19751549 | 24.27887917 | 3  | 2  | 4.7  |
| 22.01733398 | 22.71181488 | 3  | 3  | 18   |
| 25.50433731 | 25.25850105 | 16 | 16 | 11.9 |
| 26.20235825 | 27.06896973 | 12 | 12 | 37   |
| 23.98119926 | 24.24597549 | 4  | 4  | 10.8 |
| 24.23841476 | 24.20873451 | 2  | 2  | 8.6  |
| 29.74534988 | 29.81792068 | 6  | 6  | 36.2 |
| 24.73448563 | 24.34340096 | 4  | 4  | 9.6  |
| 21.22063446 | 20.713274   | 2  | 2  | 11.5 |
| 25.04735184 | 25.1964798  | 5  | 5  | 20   |
| 23.89513588 | 23.80695534 | 3  | 3  | 11.6 |
| 22.73134041 | 23.48382187 | 6  | 6  | 17.6 |
| 27.60165787 | 27.59583855 | 8  | 8  | 52.1 |
| 27.19779205 | 26.90861893 | 9  | 9  | 56.9 |
| 27.12346649 | 27.11892128 | 14 | 14 | 70   |
| 25.49810982 | 25.77873802 | 4  | 4  | 3.7  |
| 27.28091621 | 27.26140976 | 12 | 12 | 56.9 |
| 27.806427   | 28.04223442 | 12 | 12 | 46.8 |
| 23.53290939 | 24.32471085 | 2  | 1  | 5.7  |
| 25.3211689  | 24.81318474 | 4  | 3  | 18.7 |
| 24.67642975 | 24.96886253 | 3  | 3  | 12.5 |
| 21.77370262 | 22.36190796 | 1  | 1  | 4.7  |
| 23.34624481 | 23.22883415 | 2  | 2  | 10.9 |
| 34.24111557 | 34.46562958 | 49 | 46 | 77   |
| 24.14926529 | 24.98823929 | 6  | 6  | 16.5 |
| 21.70562172 | 20.79169655 | 1  | 1  | 1.6  |
| 20.36361122 | 21.88970566 | 1  | 1  | 1.5  |
| 23.36051559 | 24.06735039 | 7  | 5  | 16   |
| 22.92549706 | 21.86430931 | 3  | 3  | 5.1  |
| 30.60814285 | 30.65846825 | 27 | 25 | 68.2 |
| 25.72111511 | 26.04528999 | 7  | 7  | 17.6 |
| 24.48283768 | 24.88832283 | 6  | 6  | 17.3 |
| 19.79170418 | 21.84295273 | 2  | 2  | 5.5  |
| 27.9770546  | 28.03165245 | 19 | 19 | 50.7 |
| 26.59775734 | 26.9055233  | 11 | 11 | 37   |
| 29.5076561  | 29.55453491 | 22 | 22 | 80.8 |
| 21.69029808 | 22.49677658 | 1  | 1  | 3.9  |

|             |             |    |    |      |
|-------------|-------------|----|----|------|
| 20.81080437 | 21.31484413 | 1  | 1  | 8.1  |
| 23.89809227 | 24.31879234 | 3  | 3  | 29.4 |
| 22.0214386  | 22.14929581 | 3  | 3  | 2.4  |
| 26.77555275 | 26.67949295 | 25 | 24 | 24.1 |
| 23.19434738 | 23.46724892 | 5  | 3  | 2.3  |
| 22.29271889 | 20.89393234 | 2  | 2  | 4.4  |
| 23.71240425 | 24.01529312 | 4  | 4  | 12   |
| 25.15715218 | 25.72928238 | 4  | 4  | 21.1 |
| 24.84771156 | 24.63045311 | 2  | 2  | 11.4 |
| 25.15930939 | 25.50960159 | 4  | 4  | 13.3 |
| 28.49094582 | 29.12915421 | 28 | 28 | 37.7 |
| 27.85352898 | 27.66471863 | 15 | 15 | 32   |
| 28.48523712 | 28.53267097 | 16 | 16 | 56.7 |
| 31.27102852 | 31.3083992  | 49 | 49 | 70.9 |
| 27.61421204 | 27.62317276 | 10 | 10 | 22.9 |
| 31.65347862 | 31.6597023  | 29 | 29 | 48.4 |
| 23.4124794  | 23.34462166 | 2  | 2  | 3.2  |
| 24.79813004 | 24.74082947 | 17 | 5  | 22.5 |
| 22.99543381 | 23.36305809 | 3  | 3  | 5.6  |
| 26.86348724 | 26.89272881 | 23 | 16 | 33.3 |
| 27.9739399  | 27.97459602 | 23 | 16 | 35.7 |
| 28.00147438 | 27.86914825 | 28 | 16 | 37.2 |
| 26.70001793 | 26.67438316 | 10 | 10 | 29.9 |
| 24.69556427 | 24.60308838 | 2  | 2  | 11.3 |
| 23.66448975 | 24.06989098 | 5  | 5  | 5.2  |
| 22.59416199 | 22.5853157  | 2  | 2  | 3.3  |
| 23.41725349 | 23.90150261 | 3  | 3  | 15.8 |
| 24.49716568 | 24.66682053 | 3  | 3  | 7.7  |
| 22.94209862 | 20.33995438 | 3  | 3  | 13.7 |
| 28.81659317 | 28.91459084 | 17 | 17 | 61   |
| 26.90334129 | 27.26481247 | 9  | 9  | 46.5 |
| 25.82607079 | 24.46811867 | 2  | 2  | 32.4 |
| 27.471735   | 27.30190659 | 15 | 15 | 48.9 |
| 24.62103462 | 20.49060822 | 1  | 1  | 10.2 |
| 24.47426033 | 24.28199577 | 1  | 1  | 21.6 |
| 25.41028214 | 25.44871902 | 5  | 5  | 18.6 |
| 27.33849716 | 27.12662125 | 11 | 11 | 36.5 |
| 22.4954586  | 22.86568832 | 2  | 2  | 19.5 |
| 24.286726   | 24.31250572 | 4  | 4  | 27.9 |
| 23.95819092 | 24.16415215 | 7  | 7  | 15.7 |
| 25.25428963 | 24.97206688 | 3  | 3  | 25.6 |



|             |             |    |    |      |
|-------------|-------------|----|----|------|
| 25.99537277 | 25.74550438 | 3  | 3  | 23   |
| 25.12947273 | 25.62374496 | 9  | 9  | 22.9 |
| 27.34874535 | 27.58591843 | 9  | 4  | 68.5 |
| 21.91415215 | 21.67012024 | 5  | 1  | 47   |
| 26.36691475 | 26.09186363 | 6  | 3  | 52.8 |
| 22.58072472 | 23.20413017 | 6  | 2  | 42.8 |
| 21.67560005 | 22.56890106 | 2  | 2  | 21.7 |
| 20.92085266 | 23.02815056 | 3  | 3  | 2.5  |
| 26.40494919 | 26.20687294 | 11 | 11 | 44   |
| 21.92947578 | 23.05755043 | 3  | 3  | 8    |
| 27.75053406 | 27.63899612 | 2  | 2  | 1.4  |
| 28.41312599 | 28.44130325 | 11 | 11 | 74   |
| 23.80094719 | 24.19550514 | 2  | 2  | 23.5 |
| 20.21473122 | 23.59331894 | 5  | 5  | 7.4  |
| 22.93499184 | 23.00156212 | 3  | 3  | 7.1  |
| 23.95020294 | 24.35366631 | 2  | 2  | 13.8 |
| 25.39728165 | 25.16538048 | 4  | 4  | 35.2 |
| 22.86300659 | 22.89744568 | 1  | 1  | 4.9  |
| 25.72098541 | 25.61711693 | 6  | 6  | 28.7 |
| 23.96886253 | 24.69040489 | 5  | 5  | 30.1 |
| 24.12494659 | 23.34000778 | 3  | 3  | 27   |
| 28.19798088 | 28.35640717 | 11 | 10 | 37.9 |
| 27.42774391 | 27.21521187 | 14 | 14 | 42   |
| 27.53237343 | 27.75174713 | 9  | 9  | 53.9 |
| 28.13970566 | 28.3614769  | 9  | 9  | 66.7 |
| 25.55777359 | 25.63832092 | 3  | 3  | 29.1 |
| 24.59269142 | 24.49283409 | 2  | 2  | 16.3 |
| 25.16564751 | 25.86048317 | 5  | 5  | 19.8 |
| 23.59605217 | 23.9331913  | 5  | 5  | 19.2 |
| 23.89096832 | 23.96243477 | 5  | 5  | 17.5 |
| 25.94851112 | 25.82629013 | 11 | 11 | 19.3 |
| 31.58203697 | 31.48898506 | 19 | 19 | 54.2 |
| 20.75216484 | 22.4225235  | 1  | 1  | 3.1  |
| 22.18198395 | 21.78192711 | 2  | 2  | 4.3  |
| 23.37570572 | 22.54354286 | 1  | 1  | 6.9  |
| 22.57309151 | 22.24751091 | 2  | 2  | 4.9  |
| 27.4342804  | 27.62519455 | 18 | 18 | 48.8 |
| 22.54745483 | 22.80545998 | 2  | 2  | 4.1  |
| 27.86390114 | 27.77416992 | 15 | 15 | 46.8 |
| 26.01459122 | 26.34910011 | 5  | 5  | 58.8 |
| 27.40973091 | 27.50294113 | 20 | 12 | 23.5 |

|             |             |    |    |      |
|-------------|-------------|----|----|------|
| 25.0646801  | 25.06669235 | 3  | 3  | 12.5 |
| 25.68228149 | 25.19636726 | 8  | 8  | 39.6 |
| 27.42205811 | 27.62742233 | 19 | 13 | 28.2 |
| 23.39702034 | 23.98702431 | 7  | 4  | 11.1 |
| 20.34970474 | 22.25612068 | 4  | 1  | 4.7  |
| 26.24646378 | 26.16428757 | 12 | 9  | 14   |
| 30.63469315 | 30.69967079 | 28 | 28 | 61.7 |
| 31.47145462 | 31.62831879 | 27 | 27 | 73.5 |
| 27.05713654 | 26.96565247 | 10 | 10 | 42.6 |
| 27.66553307 | 28.01137352 | 7  | 7  | 22.7 |
| 27.32534599 | 27.39435768 | 8  | 8  | 76.4 |
| 24.33073997 | 24.65610886 | 2  | 2  | 33.8 |
| 23.24811935 | 23.73055267 | 1  | 1  | 9.3  |
| 25.81245041 | 26.30472946 | 3  | 3  | 41.7 |
| 28.81476212 | 29.09778214 | 10 | 10 | 62.4 |
| 20.61888885 | 21.61562347 | 1  | 1  | 1.2  |
| 23.72567177 | 23.61346817 | 2  | 2  | 6.6  |
| 25.30959511 | 25.26781654 | 9  | 9  | 23.8 |
| 21.15357018 | 21.65307236 | 1  | 1  | 4.3  |
| 23.02403069 | 23.91579247 | 3  | 3  | 19.5 |
| 21.96761513 | 21.65407181 | 3  | 3  | 12   |
| 22.79701233 | 23.04962921 | 3  | 3  | 9.6  |
| 23.4648819  | 23.76920891 | 3  | 3  | 4.5  |
| 24.86329842 | 24.42001915 | 3  | 3  | 40.3 |
| 22.43766212 | 22.17520714 | 1  | 1  | 2.7  |
| 24.78336716 | 25.11330795 | 9  | 9  | 26.3 |
| 21.77346039 | 22.0863781  | 1  | 1  | 2.7  |
| 27.87794876 | 27.90190506 | 5  | 5  | 62.9 |
| 22.76846313 | 22.94259834 | 1  | 1  | 6.8  |
| 28.43017769 | 28.22149467 | 17 | 17 | 46   |
| 21.0957489  | 19.34496307 | 1  | 1  | 3    |
| 21.1309433  | 21.02546692 | 1  | 1  | 1.8  |
| 23.84373856 | 23.62220955 | 3  | 3  | 12.2 |
| 23.99291229 | 23.98085022 | 3  | 3  | 18   |
| 22.45452881 | 22.37898827 | 1  | 1  | 4.1  |
| 25.12344742 | 25.19422722 | 7  | 7  | 26.4 |
| 24.12407875 | 24.00744438 | 5  | 5  | 25.8 |
| 25.58560371 | 25.52754974 | 8  | 8  | 58.3 |
| 20.16300011 | 20.89141273 | 1  | 1  | 4.6  |
| 24.51086998 | 24.61997223 | 9  | 9  | 36.7 |
| 21.9927578  | 20.07347488 | 1  | 1  | 5.7  |

|             |             |    |    |      |
|-------------|-------------|----|----|------|
| 22.52200317 | 22.32231903 | 2  | 2  | 39.8 |
| 21.5288372  | 21.05163193 | 1  | 1  | 14.2 |
| 21.10200691 | 20.5534687  | 1  | 1  | 1.7  |
| 24.65583611 | 24.95024681 | 4  | 4  | 25.5 |
| 27.67418098 | 27.78718376 | 33 | 33 | 29.7 |
| 25.77718353 | 25.49115181 | 3  | 3  | 9.2  |
| 23.06621742 | 22.46630287 | 3  | 3  | 2.9  |
| 21.88516998 | 21.68118858 | 2  | 2  | 4.2  |
| 22.94590569 | 23.70882988 | 3  | 3  | 11.9 |
| 27.3960743  | 27.72279739 | 13 | 13 | 68.1 |
| 29.19666862 | 29.82436943 | 17 | 17 | 84.6 |
| 25.35403633 | 25.35050011 | 10 | 8  | 31.1 |
| 22.26439095 | 22.74827003 | 2  | 2  | 12.7 |
| 22.46266365 | 22.57137871 | 4  | 4  | 1.6  |
| 26.95338058 | 27.16576385 | 6  | 6  | 49.7 |
| 27.48492813 | 27.85126686 | 12 | 12 | 45.4 |
| 24.69492722 | 23.82006836 | 3  | 3  | 11.7 |
| 22.99007607 | 23.33279037 | 3  | 3  | 8.6  |
| 27.6654644  | 27.40210533 | 13 | 9  | 40.2 |
| 26.07850838 | 25.74175453 | 12 | 5  | 33.3 |
| 22.14183235 | 21.86434746 | 1  | 1  | 6.8  |
| 28.22117233 | 28.35653305 | 27 | 27 | 35.8 |
| 28.13398552 | 28.47192955 | 11 | 11 | 33.5 |
| 30.54166985 | 30.26785278 | 26 | 25 | 75.9 |
| 26.63131523 | 26.69935608 | 10 | 9  | 31.3 |
| 25.29708672 | 25.7165432  | 4  | 4  | 22.7 |
| 24.72723198 | 24.22993279 | 8  | 8  | 18   |
| 28.44237137 | 28.38356209 | 21 | 21 | 40   |
| 28.49171066 | 28.31267929 | 9  | 9  | 47.2 |
| 21.93120766 | 22.0242157  | 3  | 3  | 8.3  |
| 27.67128181 | 27.86803055 | 7  | 5  | 33.9 |
| 27.38055229 | 27.39255714 | 10 | 10 | 49.3 |
| 23.94529915 | 24.66557312 | 3  | 3  | 43.2 |
| 25.3631916  | 25.4807148  | 8  | 1  | 35.8 |
| 22.30763626 | 21.98360252 | 8  | 1  | 38.9 |
| 22.00120163 | 21.48217392 | 1  | 1  | 3.1  |
| 19.07666588 | 20.04473495 | 1  | 1  | 2.9  |
| 19.17979622 | 21.51099014 | 1  | 1  | 2.9  |
| 27.67242813 | 27.23571396 | 3  | 3  | 14.3 |
| 24.27348328 | 24.04876518 | 3  | 3  | 6.8  |
| 25.19035149 | 25.2212925  | 10 | 10 | 27.7 |

|             |             |    |    |      |
|-------------|-------------|----|----|------|
| 29.20013428 | 29.10096741 | 9  | 9  | 57.9 |
| 25.58666229 | 25.87398911 | 4  | 4  | 37   |
| 23.88315582 | 24.35528183 | 5  | 4  | 18.8 |
| 22.03821754 | 20.91676521 | 2  | 2  | 3.4  |
| 21.74336815 | 22.44511032 | 1  | 1  | 1.5  |
| 19.82895088 | 22.6102047  | 2  | 2  | 6    |
| 21.62992096 | 21.75979424 | 1  | 1  | 9.8  |
| 24.02580452 | 24.78964996 | 5  | 5  | 13.8 |
| 24.63117599 | 23.96057892 | 4  | 4  | 5.7  |
| 25.198843   | 25.4877224  | 2  | 2  | 16.4 |
| 21.40835571 | 20.98628807 | 1  | 1  | 4.7  |
| 27.9949646  | 28.14583969 | 22 | 22 | 56.4 |
| 27.21335983 | 27.51525307 | 15 | 15 | 36.5 |
| 26.76040268 | 26.94402504 | 12 | 12 | 35.6 |
| 27.63381004 | 27.857687   | 15 | 15 | 53.6 |
| 27.11455917 | 27.07724571 | 17 | 17 | 39.3 |
| 26.57067108 | 27.07183647 | 14 | 14 | 24.8 |
| 26.46584892 | 25.58543205 | 11 | 11 | 13   |
| 24.69895935 | 24.42515182 | 3  | 3  | 13.4 |
| 22.54257584 | 22.69725227 | 2  | 2  | 2.7  |
| 25.61006355 | 25.51331139 | 7  | 7  | 25.5 |
| 23.53564072 | 23.25925636 | 4  | 4  | 6    |
| 24.94485283 | 25.07308388 | 2  | 2  | 8.6  |
| 26.93584442 | 27.44931602 | 12 | 12 | 33.5 |
| 21.18920517 | 22.11765671 | 1  | 1  | 3.3  |
| 24.40995789 | 24.29116058 | 1  | 1  | 4.6  |
| 27.97213173 | 27.88098717 | 3  | 3  | 27.5 |
| 26.80020523 | 25.65034103 | 2  | 2  | 11.5 |
| 24.71339989 | 24.47932625 | 5  | 5  | 11.3 |
| 19.89514542 | 21.10655022 | 2  | 2  | 27.4 |
| 24.5077877  | 24.82900238 | 4  | 4  | 13.2 |
| 27.41231918 | 27.36419487 | 8  | 7  | 57.1 |
| 24.29403877 | 23.941185   | 6  | 5  | 6.5  |
| 21.67856979 | 20.99451828 | 2  | 2  | 2.4  |
| 20.41060066 | 21.82150841 | 1  | 1  | 6.1  |
| 21.97211075 | 21.68418884 | 3  | 2  | 3.1  |
| 19.98134995 | 22.2006321  | 3  | 2  | 9.2  |
| 24.14289284 | 23.77374268 | 4  | 4  | 14.6 |
| 23.72847748 | 23.11711884 | 6  | 5  | 13.7 |
| 24.58600426 | 25.24099922 | 4  | 4  | 23.4 |
| 27.74534988 | 27.56456375 | 15 | 12 | 39.2 |

|             |             |    |    |      |
|-------------|-------------|----|----|------|
| 29.022686   | 29.42754364 | 22 | 19 | 55.9 |
| 24.4759922  | 24.26470566 | 5  | 5  | 9.3  |
| 23.2030983  | 23.61279297 | 1  | 1  | 10.1 |
| 28.02606773 | 27.63754654 | 19 | 19 | 21.4 |
| 22.65672112 | 23.46799469 | 3  | 3  | 9.8  |
| 29.37883759 | 29.40212631 | 15 | 13 | 74.1 |
| 25.42123985 | 25.0324192  | 7  | 5  | 52.4 |
| 24.05804634 | 24.19618034 | 3  | 3  | 21.6 |
| 23.59023666 | 23.40976334 | 2  | 2  | 10.6 |
| 20.26900673 | 22.66135979 | 1  | 1  | 5.4  |
| 20.32430077 | 22.67684937 | 2  | 2  | 15.6 |
| 21.43938828 | 21.60277176 | 1  | 1  | 4.1  |
| 22.27247238 | 23.43872833 | 3  | 3  | 18.3 |
| 24.86207008 | 25.30225563 | 3  | 3  | 30.6 |
| 30.63763237 | 30.52234268 | 17 | 16 | 61.7 |
| 26.25875282 | 27.23835945 | 13 | 12 | 44.4 |
| 23.56115913 | 23.43847466 | 5  | 5  | 5.2  |
| 22.58675957 | 20.25767326 | 1  | 1  | 4.5  |
| 22.2931118  | 23.16075706 | 1  | 1  | 3.3  |
| 24.88082314 | 24.84608459 | 6  | 6  | 53.5 |
| 26.70345497 | 26.84409904 | 11 | 11 | 47.7 |
| 27.91627121 | 27.7358284  | 14 | 14 | 70   |
| 20.25834656 | 21.37060738 | 1  | 1  | 2.2  |
| 19.82287979 | 21.86517906 | 1  | 1  | 3    |
| 21.29065514 | 22.54165459 | 2  | 2  | 9.5  |
| 30.6098156  | 30.83115196 | 70 | 70 | 55.5 |
| 26.97760201 | 26.60808945 | 9  | 9  | 23.2 |
| 25.38337326 | 25.28142929 | 5  | 5  | 23.1 |
| 27.5773716  | 28.42562485 | 7  | 7  | 36.8 |
| 25.0606041  | 24.79684448 | 7  | 7  | 36.2 |
| 24.16584015 | 24.00761414 | 1  | 1  | 8.8  |
| 26.0651741  | 26.15882874 | 10 | 10 | 31.8 |
| 28.1668644  | 28.17450523 | 9  | 8  | 36.1 |
| 21.29350471 | 23.66242599 | 8  | 8  | 23.2 |
| 22.01154327 | 22.26828003 | 2  | 2  | 11   |
| 22.00888062 | 22.32770157 | 1  | 1  | 4.9  |
| 22.97125053 | 19.82841301 | 1  | 1  | 9.3  |
| 22.3046875  | 22.61393929 | 3  | 3  | 9.1  |
| 20.96276665 | 21.15641212 | 10 | 10 | 8.1  |
| 33.68280029 | 33.67934036 | 15 | 15 | 11.7 |
| 33.02237701 | 33.13911819 | 21 | 21 | 20   |

|             |             |    |    |      |
|-------------|-------------|----|----|------|
| 30.96788025 | 31.17277718 | 4  | 3  | 3.9  |
| 27.53786278 | 27.09888649 | 5  | 2  | 4.3  |
| 30.96506119 | 30.86798477 | 9  | 9  | 7.5  |
| 30.64185905 | 30.4543457  | 15 | 15 | 14.8 |
| 23.66557312 | 23.13172722 | 1  | 1  | 2.1  |
| 28.191782   | 28.33879471 | 7  | 7  | 6    |
| 27.77461052 | 27.8283844  | 5  | 5  | 6.3  |
| 25.92822838 | 26.03827286 | 20 | 12 | 10.8 |
| 22.90695953 | 23.5775013  | 4  | 4  | 7.6  |
| 22.57927513 | 23.03521729 | 3  | 3  | 24.6 |
| 21.06804085 | 20.49179459 | 1  | 1  | 7.5  |
| 23.75715065 | 24.07781601 | 2  | 2  | 13.6 |
| 24.63272858 | 24.77213287 | 7  | 7  | 44.1 |
| 22.21089172 | 21.99838066 | 1  | 1  | 6.1  |
| 26.39645004 | 26.88308716 | 23 | 23 | 28.9 |
| 26.07357407 | 26.20629692 | 13 | 13 | 22.7 |
| 24.26341629 | 24.0500946  | 7  | 7  | 9.6  |
| 24.86990166 | 25.05038452 | 6  | 6  | 43.8 |
| 26.56155205 | 26.49845886 | 13 | 11 | 24.5 |
| 22.40867615 | 22.36711693 | 5  | 3  | 7.4  |
| 25.91344452 | 26.30883026 | 6  | 6  | 19.4 |
| 25.06542015 | 25.20761871 | 5  | 5  | 18   |
| 24.31236649 | 24.42854309 | 5  | 5  | 19.5 |
| 23.86353493 | 23.95153809 | 2  | 2  | 6.9  |
| 20.60932732 | 20.81596565 | 2  | 2  | 7.1  |
| 23.79302788 | 23.42918015 | 4  | 4  | 21.1 |
| 23.28305626 | 23.35689354 | 2  | 2  | 20.9 |
| 21.81092072 | 20.10774803 | 1  | 1  | 5.3  |
| 23.55180359 | 24.13398552 | 7  | 7  | 18.5 |
| 24.2004528  | 24.1483345  | 3  | 3  | 12.1 |
| 22.40418625 | 22.78767776 | 5  | 5  | 16.3 |
| 25.78563881 | 25.34553528 | 7  | 7  | 17.4 |
| 27.93814659 | 27.806427   | 14 | 14 | 37.8 |
| 21.7727375  | 22.54281235 | 1  | 1  | 11.3 |
| 26.77680779 | 26.80439758 | 5  | 5  | 36.1 |
| 28.57145119 | 28.39034462 | 7  | 7  | 54.8 |
| 25.74167824 | 26.10775185 | 7  | 7  | 51.6 |
| 28.40807152 | 28.12005806 | 4  | 4  | 61.3 |
| 27.16182899 | 27.58813667 | 8  | 8  | 70.9 |
| 25.79808044 | 25.87897682 | 4  | 4  | 59.2 |
| 25.75087929 | 25.17436218 | 1  | 1  | 16.2 |

|             |             |    |    |      |
|-------------|-------------|----|----|------|
| 24.98428917 | 25.17500877 | 3  | 3  | 56.6 |
| 24.16790771 | 23.97237396 | 1  | 1  | 14.3 |
| 25.92730141 | 25.96721458 | 10 | 10 | 14.8 |
| 27.8434391  | 28.64278793 | 12 | 12 | 31.9 |
| 23.75837135 | 23.85338593 | 4  | 4  | 10.5 |
| 26.51389885 | 26.44928551 | 8  | 8  | 20.1 |
| 22.50963783 | 22.52528    | 3  | 2  | 10.6 |
| 26.61960983 | 26.33128738 | 7  | 6  | 18.4 |
| 19.4534111  | 21.22735023 | 1  | 1  | 2.9  |
| 20.59242058 | 22.15560913 | 2  | 2  | 10.9 |
| 24.21837616 | 24.6725502  | 3  | 3  | 12.3 |
| 25.73435593 | 25.61085129 | 2  | 2  | 7.4  |
| 24.18419647 | 24.34380722 | 1  | 1  | 10.5 |
| 24.32457352 | 24.22368813 | 4  | 4  | 6.7  |
| 24.35904121 | 23.94940186 | 7  | 7  | 11.7 |
| 26.54104233 | 25.7665081  | 18 | 18 | 33.3 |
| 20.02623558 | 20.43290138 | 1  | 1  | 2.3  |
| 24.96124268 | 24.73536301 | 14 | 14 | 31.2 |
| 21.23391724 | 20.43240738 | 1  | 1  | 3.8  |
| 29.87202835 | 29.97910118 | 4  | 4  | 71.4 |
| 29.77478218 | 29.78607941 | 8  | 8  | 71.2 |
| 25.1590023  | 24.59075165 | 6  | 6  | 29.6 |
| 22.8012619  | 23.19547462 | 1  | 1  | 5    |
| 25.34624481 | 25.32436752 | 5  | 5  | 30.9 |
| 25.22177124 | 24.328619   | 6  | 6  | 26.6 |
| 23.50421524 | 24.06192207 | 2  | 2  | 10   |
| 29.93733406 | 29.63580132 | 18 | 18 | 50   |
| 25.58972359 | 25.60453033 | 9  | 9  | 29   |
| 27.39778709 | 27.69796562 | 8  | 8  | 14.3 |
| 23.3013134  | 23.85566902 | 3  | 3  | 8.9  |
| 22.27526093 | 22.72941208 | 4  | 4  | 13.2 |
| 24.86244774 | 25.10173416 | 6  | 6  | 21.5 |
| 23.79629898 | 23.35353279 | 1  | 1  | 7.9  |
| 29.65362549 | 29.96829224 | 12 | 12 | 64.8 |
| 29.45309067 | 29.18491936 | 13 | 13 | 67.4 |
| 19.60756111 | 23.93831635 | 1  | 1  | 9.3  |
| 25.53112411 | 25.83202553 | 3  | 3  | 33.7 |
| 23.52073288 | 22.99312019 | 2  | 2  | 9.1  |
| 25.30211639 | 25.12931633 | 6  | 6  | 19.1 |
| 22.29288864 | 23.0237751  | 1  | 1  | 2.4  |
| 26.29307365 | 26.51701164 | 9  | 7  | 16   |

|             |             |    |    |      |
|-------------|-------------|----|----|------|
| 22.39042282 | 22.71158409 | 2  | 1  | 3.4  |
| 22.66088295 | 21.52133179 | 3  | 2  | 6.9  |
| 23.52037239 | 23.21406746 | 2  | 2  | 5.2  |
| 26.16209793 | 26.56539154 | 9  | 7  | 17.4 |
| 21.53872108 | 21.51936531 | 2  | 2  | 3.6  |
| 24.73696327 | 25.13731384 | 9  | 9  | 14.1 |
| 25.67006683 | 25.98858643 | 6  | 6  | 25.4 |
| 27.76610374 | 27.78830528 | 11 | 11 | 37.1 |
| 24.21504593 | 24.63300705 | 2  | 2  | 11.1 |
| 24.42335701 | 24.83812332 | 6  | 6  | 11.2 |
| 19.4334507  | 21.96413231 | 1  | 1  | 3.1  |
| 22.34721947 | 21.61517525 | 4  | 4  | 5.5  |
| 23.07177544 | 22.59336472 | 3  | 3  | 4.2  |
| 22.22261238 | 22.30713654 | 2  | 2  | 3.2  |
| 23.1960144  | 23.81548309 | 3  | 3  | 5    |
| 25.85607147 | 25.66925621 | 3  | 3  | 18.6 |
| 21.20323372 | 21.86631203 | 1  | 1  | 8.1  |
| 23.15890884 | 21.03116417 | 1  | 1  | 15.7 |
| 25.22214127 | 25.3277626  | 4  | 4  | 32.1 |
| 23.45901489 | 23.70007133 | 2  | 2  | 32.2 |
| 23.58680534 | 24.41331863 | 4  | 4  | 27.9 |
| 29.92195702 | 30.09005165 | 18 | 18 | 83.5 |
| 23.29586029 | 23.68720436 | 1  | 1  | 5.3  |
| 26.98043633 | 26.80587387 | 9  | 9  | 58.6 |
| 26.84983635 | 26.88191986 | 9  | 5  | 63.8 |
| 26.07201958 | 26.10193443 | 13 | 13 | 13   |
| 25.25432587 | 25.35259056 | 5  | 5  | 37.9 |
| 23.47456932 | 24.10157394 | 2  | 2  | 7.4  |
| 19.5460434  | 22.4432888  | 2  | 2  | 3.5  |
| 20.98300934 | 21.18046761 | 2  | 2  | 5.9  |
| 27.62414932 | 27.78462791 | 8  | 8  | 53.8 |
| 22.83120918 | 19.52388954 | 3  | 3  | 4.9  |
| 22.66286087 | 22.75861549 | 2  | 2  | 5.1  |
| 26.50104523 | 26.21352577 | 12 | 12 | 17.1 |
| 26.51818275 | 26.44134331 | 8  | 8  | 19.8 |
| 20.45378494 | 18.8283329  | 3  | 3  | 14.6 |
| 27.09768105 | 27.59391594 | 2  | 2  | 39.1 |
| 24.87951469 | 25.2053833  | 6  | 6  | 22.2 |
| 26.22585869 | 26.13668823 | 12 | 12 | 26.1 |
| 32.67577362 | 32.54450607 | 19 | 18 | 53.4 |
| 23.8630619  | 24.28841591 | 5  | 5  | 20.7 |



|             |             |    |    |      |
|-------------|-------------|----|----|------|
| 26.10043144 | 25.90320396 | 10 | 10 | 13.6 |
| 26.44502831 | 26.71934128 | 11 | 11 | 35.1 |
| 22.20824432 | 22.00980186 | 1  | 1  | 8.6  |
| 20.13819885 | 20.65149689 | 1  | 1  | 5.5  |
| 26.31316376 | 26.59306145 | 9  | 9  | 43.9 |
| 25.16065598 | 25.43224335 | 7  | 7  | 8.6  |
| 20.51729965 | 20.96308136 | 1  | 1  | 3.3  |
| 26.82140732 | 27.11793137 | 8  | 8  | 30.2 |
| 23.96895027 | 23.81665421 | 1  | 1  | 5.4  |
| 27.13760567 | 27.26945877 | 9  | 9  | 95.8 |
| 26.70160484 | 26.9197979  | 9  | 9  | 16.5 |
| 24.26935196 | 25.15607262 | 12 | 6  | 22.9 |
| 22.26464844 | 22.79899025 | 3  | 3  | 3.9  |
| 21.85022163 | 21.66479301 | 1  | 1  | 3    |
| 27.18839073 | 27.47823143 | 9  | 9  | 27.8 |
| 27.31389046 | 27.25871658 | 11 | 3  | 23.1 |
| 24.23513031 | 23.81489563 | 11 | 3  | 22.2 |
| 24.78456688 | 20.02895164 | 2  | 2  | 2.7  |
| 26.91650009 | 27.27275467 | 14 | 8  | 30.1 |
| 28.29981232 | 26.27918053 | 2  | 2  | 5.3  |
| 22.77432632 | 22.80364799 | 3  | 3  | 7.5  |
| 28.28135872 | 28.20815849 | 14 | 14 | 55.2 |
| 24.9225235  | 24.80548096 | 4  | 4  | 8.7  |
| 21.6399765  | 22.97010994 | 2  | 2  | 7.6  |
| 24.37755966 | 24.65698242 | 5  | 5  | 22.8 |
| 24.19828033 | 24.23381424 | 5  | 5  | 24.6 |
| 21.38700676 | 22.5184288  | 2  | 2  | 8    |
| 23.73768616 | 23.83248329 | 3  | 3  | 4.5  |
| 20.72139168 | 20.67598724 | 2  | 2  | 2.1  |
| 26.63145256 | 27.15044594 | 11 | 11 | 10.9 |
| 21.85741615 | 22.00514984 | 5  | 5  | 5.9  |
| 22.06157684 | 22.45911407 | 2  | 2  | 6.7  |
| 28.39786911 | 28.48477554 | 20 | 20 | 37.7 |
| 28.11053276 | 27.75404358 | 11 | 11 | 31   |
| 27.43857002 | 27.42109489 | 10 | 10 | 31.5 |
| 29.78245926 | 29.59820175 | 93 | 93 | 35.7 |
| 22.72475624 | 22.87000465 | 4  | 4  | 11.9 |
| 24.13398552 | 24.76895714 | 2  | 2  | 9.3  |
| 24.20761871 | 24.20090103 | 2  | 2  | 9.2  |
| 23.3794117  | 23.75195122 | 1  | 1  | 5.4  |
| 25.57853699 | 25.89073563 | 7  | 7  | 28.5 |

|             |             |     |     |      |
|-------------|-------------|-----|-----|------|
| 22.74055099 | 23.50142479 | 2   | 2   | 2.4  |
| 22.93524361 | 23.0717411  | 2   | 2   | 5.5  |
| 23.09756088 | 23.28474998 | 3   | 3   | 10.3 |
| 20.60794067 | 20.2561512  | 5   | 0   | 6.2  |
| 26.90104103 | 26.65389824 | 22  | 22  | 45.4 |
| 26.42835045 | 26.38146019 | 15  | 10  | 22.4 |
| 23.44695282 | 23.42380714 | 5   | 5   | 3.6  |
| 28.36047363 | 28.45293427 | 17  | 17  | 60.7 |
| 23.63356018 | 24.25594711 | 7   | 7   | 21.3 |
| 21.82248306 | 21.94145393 | 1   | 1   | 2    |
| 26.3989296  | 26.89504242 | 3   | 3   | 45.5 |
| 29.49556541 | 29.58947563 | 27  | 23  | 65.9 |
| 18.42702866 | 21.48551941 | 2   | 2   | 10.7 |
| 22.2283783  | 22.03113365 | 5   | 5   | 0.9  |
| 30.95428276 | 30.91413498 | 18  | 17  | 81.8 |
| 22.19802475 | 21.05218506 | 1   | 1   | 13.3 |
| 26.44595909 | 25.98246193 | 11  | 11  | 27.6 |
| 28.03705788 | 28.63706207 | 1   | 1   | 5.5  |
| 25.69858742 | 25.83703995 | 5   | 5   | 38.9 |
| 29.67767906 | 29.81564713 | 106 | 106 | 30.9 |
| 23.45022964 | 22.98921013 | 1   | 1   | 5.6  |
| 25.17938232 | 25.0509243  | 7   | 7   | 22.2 |
| 27.6135807  | 27.6689167  | 3   | 3   | 27   |
| 22.44781113 | 25.03359604 | 2   | 2   | 38.5 |
| 21.78536415 | 21.60354042 | 1   | 1   | 15.9 |
| 23.28220749 | 22.66018486 | 2   | 2   | 49.1 |
| 25.6403904  | 25.55692673 | 8   | 8   | 36.1 |
| 20.41204071 | 20.36271095 | 1   | 1   | 7.2  |
| 27.75665474 | 28.06855965 | 10  | 10  | 51   |
| 27.84882164 | 27.80495071 | 14  | 14  | 59.5 |
| 24.10381699 | 24.38712502 | 5   | 5   | 16.8 |
| 25.4751873  | 25.12257767 | 7   | 7   | 17.5 |
| 21.60390282 | 21.59859848 | 1   | 1   | 3.2  |
| 31.11669159 | 31.42201805 | 25  | 15  | 65.4 |
| 26.55473328 | 26.67411423 | 4   | 4   | 30.7 |
| 26.00665283 | 26.32015419 | 6   | 6   | 33.8 |
| 21.567276   | 21.33543587 | 2   | 2   | 17.8 |
| 27.39786911 | 27.95288086 | 12  | 12  | 39.6 |
| 29.74827957 | 29.81069183 | 39  | 38  | 56.3 |
| 28.22719955 | 27.96724701 | 11  | 11  | 30   |
| 27.2795887  | 26.94257164 | 9   | 9   | 29.8 |

|             |             |    |    |      |
|-------------|-------------|----|----|------|
| 24.17012596 | 24.18805122 | 6  | 4  | 29.6 |
| 22.68579292 | 23.35272408 | 3  | 3  | 5    |
| 24.40301704 | 24.78596306 | 9  | 8  | 12.6 |
| 23.74067497 | 24.08893585 | 5  | 5  | 5.8  |
| 22.87648392 | 22.84400749 | 3  | 3  | 7.2  |
| 27.65136719 | 27.82687187 | 25 | 15 | 60.7 |
| 31.88914299 | 31.89641571 | 41 | 37 | 78.8 |
| 22.07512474 | 22.0356369  | 14 | 3  | 32.5 |
| 28.41134834 | 28.49697495 | 26 | 18 | 58.6 |
| 24.37112617 | 23.98858643 | 6  | 6  | 25.4 |
| 24.28841591 | 24.45713615 | 4  | 4  | 11   |
| 26.30391121 | 26.5497036  | 14 | 14 | 11.7 |
| 24.10389519 | 24.61689186 | 4  | 4  | 7.2  |
| 24.63123131 | 25.19347572 | 8  | 8  | 12   |
| 23.7135582  | 24.47140884 | 4  | 4  | 12.2 |
| 23.46076393 | 24.18638992 | 9  | 9  | 26.1 |
| 26.38953972 | 26.38083267 | 7  | 7  | 31.9 |
| 22.86721611 | 22.48062134 | 2  | 2  | 7.2  |
| 18.68120003 | 24.3622551  | 2  | 2  | 8    |
| 23.03415871 | 23.69296074 | 2  | 2  | 10   |
| 23.69795227 | 23.90985489 | 1  | 1  | 7.6  |
| 24.33060265 | 24.70424652 | 3  | 3  | 13.6 |
| 27.56848335 | 27.85239792 | 13 | 6  | 41.1 |
| 24.53824806 | 24.37577248 | 9  | 2  | 28.3 |
| 25.04138947 | 25.43144608 | 4  | 2  | 15.1 |
| 25.39806557 | 25.81675339 | 5  | 5  | 13.9 |
| 22.8247757  | 23.28757095 | 3  | 3  | 12.9 |
| 24.48904037 | 24.33135414 | 6  | 5  | 5    |
| 23.94145393 | 23.97412491 | 9  | 9  | 13.7 |
| 25.68616295 | 25.55162621 | 4  | 4  | 38.6 |
| 24.18343925 | 24.56401062 | 5  | 5  | 14.5 |
| 27.13467216 | 27.42942047 | 9  | 9  | 83.8 |
| 23.4667511  | 25.64710426 | 7  | 7  | 26.4 |
| 24.76688576 | 24.95619774 | 1  | 1  | 4.7  |
| 23.57496262 | 23.73324394 | 4  | 4  | 7.2  |
| 22.60494423 | 22.69935036 | 2  | 2  | 12.6 |
| 25.9759407  | 25.88415909 | 5  | 5  | 38.6 |
| 26.51831818 | 26.67801476 | 12 | 12 | 27.9 |
| 27.18224525 | 26.93168068 | 10 | 10 | 28.2 |
| 27.0856781  | 26.58606148 | 8  | 8  | 28.1 |
| 29.81549454 | 29.75789452 | 24 | 19 | 74.2 |

|             |             |    |    |      |
|-------------|-------------|----|----|------|
| 21.41178131 | 21.48035049 | 5  | 1  | 19.4 |
| 24.00127029 | 24.20858574 | 8  | 4  | 30.9 |
| 23.45010376 | 19.38607407 | 17 | 17 | 21.8 |
| 23.56267357 | 23.65643692 | 5  | 5  | 8.7  |
| 24.8241539  | 24.9460125  | 6  | 6  | 10.6 |
| 21.15690613 | 21.17157745 | 1  | 1  | 2.4  |
| 27.23662758 | 27.29193306 | 8  | 8  | 26.7 |
| 29.28740501 | 29.21206093 | 12 | 12 | 31.1 |
| 20.67930984 | 23.04841614 | 5  | 3  | 7.6  |
| 25.25774574 | 25.77170372 | 5  | 4  | 6.8  |
| 28.58437729 | 28.84397888 | 22 | 22 | 60.4 |
| 24.88301659 | 25.28570366 | 5  | 5  | 17.3 |
| 22.08355713 | 22.83680344 | 1  | 1  | 1.7  |
| 22.25807762 | 22.53765488 | 1  | 1  | 2.9  |
| 20.32285881 | 22.55840492 | 5  | 3  | 5.8  |
| 26.51092911 | 26.41231918 | 18 | 18 | 16.3 |
| 22.13980484 | 22.24881554 | 2  | 2  | 3.2  |
| 20.19470596 | 20.25218964 | 2  | 2  | 3.3  |
| 22.62408447 | 22.84132195 | 4  | 4  | 4.6  |
| 19.99726486 | 21.12186813 | 1  | 1  | 0.9  |
| 24.76577377 | 25.24775124 | 3  | 3  | 15.9 |
| 24.70751381 | 24.50445747 | 4  | 4  | 22.1 |
| 25.37779236 | 25.7934742  | 8  | 8  | 33.5 |
| 27.97623634 | 28.01510048 | 9  | 9  | 62.4 |
| 28.7183609  | 28.67620087 | 26 | 26 | 32.6 |
| 23.47506523 | 23.86098099 | 2  | 2  | 5.3  |
| 29.93438339 | 29.68787384 | 16 | 16 | 62.8 |
| 28.12750626 | 28.15112495 | 11 | 11 | 58.8 |
| 26.41021729 | 26.31497955 | 10 | 10 | 21.1 |
| 24.47171974 | 25.81680107 | 6  | 6  | 42.5 |
| 21.14139557 | 20.91407776 | 1  | 1  | 1.1  |
| 23.18136215 | 23.66492271 | 2  | 2  | 3.8  |
| 26.93528366 | 27.1204052  | 13 | 13 | 23.5 |
| 25.76496506 | 25.73365784 | 7  | 7  | 17.2 |
| 25.02381897 | 25.05506897 | 3  | 3  | 24.1 |
| 28.20256424 | 28.42846298 | 12 | 12 | 75.8 |
| 22.99076843 | 22.70322227 | 4  | 4  | 13.9 |
| 26.15309715 | 26.12664032 | 10 | 10 | 43.7 |
| 23.88222313 | 23.509058   | 6  | 6  | 9.5  |
| 19.86817169 | 23.34867859 | 5  | 5  | 7.6  |
| 27.45974922 | 27.34671783 | 27 | 27 | 40.3 |

|             |             |     |     |      |
|-------------|-------------|-----|-----|------|
| 24.55876732 | 24.10453606 | 9   | 9   | 19.2 |
| 24.10093307 | 23.95517921 | 2   | 2   | 12.3 |
| 20.95461082 | 21.18174171 | 2   | 2   | 5.3  |
| 22.88328743 | 23.14847374 | 2   | 2   | 11   |
| 26.03856659 | 25.64518166 | 1   | 1   | 2.7  |
| 21.41951752 | 21.2022171  | 1   | 1   | 3.3  |
| 22.74992752 | 22.79786301 | 1   | 1   | 2.8  |
| 24.90403175 | 25.01576042 | 7   | 7   | 18.9 |
| 24.40743256 | 24.46014023 | 6   | 6   | 12.6 |
| 29.93536758 | 30.49027634 | 101 | 101 | 59.3 |
| 25.66161156 | 25.74793816 | 2   | 2   | 18.6 |
| 24.49820137 | 25.6875782  | 3   | 3   | 13.5 |
| 30.11247253 | 29.93999672 | 20  | 20  | 65.6 |
| 23.49191666 | 23.77303886 | 3   | 2   | 6.4  |
| 23.15821648 | 23.60116196 | 2   | 1   | 4.4  |
| 26.53146744 | 26.33859825 | 12  | 12  | 11.9 |
| 32.48656464 | 32.51462936 | 18  | 18  | 42.2 |
| 33.22245026 | 33.26988602 | 103 | 99  | 44.1 |
| 24.60455894 | 24.38080025 | 6   | 2   | 2.2  |
| 21.94488716 | 22.83285141 | 1   | 1   | 4.7  |
| 21.90620804 | 21.42218971 | 5   | 5   | 8.7  |
| 21.27764702 | 22.14864349 | 2   | 2   | 6.8  |
| 23.84335518 | 21.66936302 | 2   | 2   | 9    |
| 21.67968559 | 22.21839142 | 2   | 2   | 4.1  |
| 22.08537483 | 22.17365265 | 2   | 2   | 12.7 |
| 23.45161438 | 23.64339447 | 3   | 3   | 7.2  |
| 22.6046505  | 21.78759766 | 2   | 2   | 11.6 |
| 29.50271416 | 28.6788559  | 22  | 22  | 49.2 |
| 30.25135422 | 29.62590981 | 32  | 32  | 68.2 |
| 22.74273109 | 21.25660896 | 2   | 2   | 15.5 |
| 30.59076118 | 29.81816483 | 21  | 21  | 57.6 |
| 20.28711128 | 22.23657608 | 1   | 1   | 4.4  |
| 28.43789673 | 28.25331688 | 17  | 17  | 57.4 |
| 29.90109825 | 29.74491692 | 23  | 23  | 69.6 |
| 24.32030869 | 24.12888336 | 7   | 7   | 35.3 |
| 25.89654541 | 25.93111801 | 8   | 8   | 12.2 |
| 26.5920639  | 26.49664688 | 4   | 4   | 27.6 |
| 23.95082474 | 23.86154938 | 2   | 2   | 5.3  |
| 24.26277161 | 24.7796154  | 1   | 1   | 8.6  |
| 22.4616642  | 23.214468   | 2   | 2   | 11.2 |
| 24.24778748 | 25.14487648 | 4   | 4   | 12   |

|             |             |     |     |      |
|-------------|-------------|-----|-----|------|
| 23.94368935 | 23.10634232 | 4   | 4   | 12.5 |
| 26.857687   | 26.90138626 | 17  | 17  | 18.6 |
| 34.88839722 | 34.80342484 | 162 | 152 | 74.8 |
| 27.64739418 | 27.7679348  | 41  | 31  | 24.3 |
| 24.98428917 | 24.80484009 | 7   | 7   | 24.5 |
| 25.58797836 | 25.38060188 | 6   | 6   | 23.7 |
| 20.82866287 | 22.63929176 | 2   | 2   | 3.4  |
| 26.93809128 | 27.12790108 | 10  | 10  | 28.2 |
| 30.26270866 | 30.37430573 | 24  | 24  | 60.4 |
| 23.98459244 | 24.12652206 | 7   | 7   | 16.7 |
| 26.50964737 | 26.50975227 | 7   | 7   | 29.3 |
| 20.85437584 | 21.21175194 | 1   | 1   | 3.4  |
| 31.89048386 | 31.47193909 | 87  | 87  | 51.7 |
| 23.0098362  | 23.18121147 | 4   | 4   | 15.4 |
| 23.2731266  | 23.22608566 | 3   | 2   | 3.9  |
| 26.10707283 | 21.59887123 | 3   | 3   | 1    |
| 23.51243782 | 22.99289513 | 3   | 3   | 11.4 |
| 27.03002167 | 27.22370529 | 9   | 9   | 57.7 |
| 23.24061394 | 23.45575714 | 1   | 1   | 7.3  |
| 24.38495445 | 25.22335625 | 3   | 3   | 7.9  |
| 23.5389576  | 23.7923336  | 2   | 2   | 6.5  |
| 25.32192612 | 25.40778732 | 6   | 5   | 16.3 |
| 22.52022552 | 23.20536804 | 4   | 3   | 16.3 |
| 26.28091621 | 26.44722176 | 14  | 14  | 37.7 |
| 22.15668869 | 22.98307991 | 2   | 2   | 3.1  |
| 20.75531769 | 21.06025696 | 1   | 1   | 14.5 |
| 20.78676033 | 21.36964798 | 1   | 1   | 1.8  |
| 25.42739105 | 25.52775764 | 7   | 7   | 30.4 |
| 22.50227356 | 22.72629547 | 1   | 1   | 4.7  |
| 23.0723629  | 23.57357597 | 4   | 4   | 20.8 |
| 27.67175484 | 27.88203621 | 22  | 22  | 34.3 |
| 32.05536652 | 32.22236633 | 22  | 22  | 69.1 |
| 20.62726593 | 23.13863373 | 3   | 3   | 4.5  |
| 23.77213287 | 24.26685143 | 5   | 5   | 10.5 |
| 24.13422203 | 24.17409515 | 4   | 4   | 25.3 |
| 23.26956558 | 23.25186539 | 3   | 3   | 8.8  |
| 24.62299156 | 24.20082664 | 5   | 5   | 12.9 |
| 28.47332382 | 28.49613762 | 15  | 15  | 42.9 |
| 22.14180183 | 22.24164772 | 1   | 1   | 4.3  |
| 22.78502464 | 22.97505379 | 2   | 2   | 4.8  |
| 24.49497032 | 24.45638466 | 11  | 11  | 6.5  |

|             |             |    |    |      |
|-------------|-------------|----|----|------|
| 27.17578888 | 27.23589706 | 18 | 15 | 53   |
| 29.07637978 | 29.33598709 | 24 | 21 | 66.5 |
| 21.17102814 | 21.00278282 | 2  | 2  | 3.7  |
| 21.80942917 | 22.8975563  | 1  | 1  | 10.5 |
| 22.08203125 | 19.6551857  | 1  | 1  | 9.1  |
| 23.49874878 | 23.55660439 | 2  | 1  | 2.9  |
| 23.62433052 | 20.51603889 | 2  | 1  | 3.7  |
| 25.34536552 | 25.7166481  | 12 | 12 | 12.2 |
| 27.61652756 | 27.81945992 | 9  | 9  | 54.9 |
| 25.36542892 | 25.67041779 | 6  | 6  | 25.8 |
| 25.46967125 | 25.46344948 | 3  | 3  | 23.4 |
| 23.62811852 | 23.52921867 | 2  | 2  | 12.4 |
| 28.55252075 | 28.82575035 | 23 | 23 | 55   |
| 25.12695503 | 25.39096832 | 7  | 7  | 30   |
| 23.93642998 | 23.77444649 | 3  | 3  | 9    |
| 23.36185455 | 23.88054276 | 2  | 2  | 23.9 |
| 22.96439171 | 23.04508591 | 3  | 3  | 8.8  |
| 24.4719677  | 24.31941414 | 4  | 4  | 13.6 |
| 22.83965111 | 20.20592499 | 2  | 2  | 8.1  |
| 26.04374695 | 25.78902626 | 7  | 2  | 22.8 |
| 23.22879028 | 23.26856613 | 3  | 3  | 9    |
| 23.24395752 | 23.73809814 | 9  | 1  | 27.4 |
| 28.07917976 | 28.09536934 | 16 | 8  | 54.6 |
| 25.4262085  | 25.81071091 | 9  | 0  | 28.5 |
| 22.85140419 | 22.94313622 | 8  | 2  | 30.8 |
| 26.05065536 | 25.96126366 | 9  | 5  | 31.5 |
| 26.1018734  | 26.01867104 | 9  | 8  | 30   |
| 26.45271301 | 26.21565628 | 13 | 7  | 50.9 |
| 27.47823143 | 27.84858322 | 15 | 7  | 60.9 |
| 26.90804672 | 27.28762436 | 11 | 11 | 50.5 |
| 19.71899033 | 23.45989037 | 7  | 3  | 28.5 |
| 22.31686211 | 22.72878838 | 2  | 2  | 8.8  |
| 21.20006371 | 21.66800117 | 1  | 1  | 6    |
| 22.71431351 | 22.59798431 | 2  | 2  | 2.6  |
| 23.67141724 | 23.39453697 | 2  | 2  | 11.2 |
| 21.78072739 | 19.82740784 | 2  | 2  | 18.4 |
| 28.80624199 | 28.89249802 | 21 | 21 | 60.2 |
| 21.66266441 | 20.85079384 | 3  | 3  | 11.3 |
| 22.20233727 | 22.94324303 | 3  | 2  | 8.3  |
| 27.53281975 | 27.27115059 | 24 | 23 | 66.2 |
| 26.67370987 | 26.49124336 | 6  | 5  | 25.3 |

|             |             |    |    |      |
|-------------|-------------|----|----|------|
| 28.14632416 | 28.10983467 | 28 | 28 | 53.8 |
| 30.08042717 | 29.96195984 | 22 | 22 | 50.9 |
| 21.731287   | 23.3924427  | 1  | 1  | 3.5  |
| 20.19364166 | 23.00549126 | 3  | 3  | 9.3  |
| 28.48216057 | 28.39071274 | 13 | 13 | 74.6 |
| 29.05468178 | 29.28817368 | 7  | 7  | 32.3 |
| 23.84527206 | 23.53290939 | 1  | 1  | 6.5  |
| 23.29291534 | 23.6413002  | 1  | 1  | 9.1  |
| 24.10709381 | 24.4373951  | 7  | 7  | 35.5 |
| 27.19422722 | 27.10988426 | 9  | 9  | 36.9 |
| 25.24238205 | 25.38962173 | 4  | 4  | 10.5 |
| 22.62091255 | 21.02920341 | 3  | 3  | 14.3 |
| 22.26247025 | 20.06982422 | 1  | 1  | 3.5  |
| 22.7425251  | 22.95801544 | 1  | 1  | 6.9  |
| 30.36170769 | 30.3561554  | 26 | 2  | 54.6 |
| 24.15275002 | 23.75276947 | 25 | 1  | 57   |
| 24.80454445 | 25.26384735 | 6  | 6  | 21.9 |
| 23.84498405 | 23.4247036  | 3  | 3  | 7.2  |
| 22.85460281 | 22.99439812 | 1  | 1  | 5.4  |
| 25.52641487 | 25.86844254 | 8  | 8  | 48.2 |
| 29.40954971 | 29.08258438 | 20 | 13 | 81.2 |
| 24.46724892 | 24.22751236 | 5  | 4  | 28.6 |
| 23.44796181 | 23.02103233 | 9  | 2  | 44   |
| 23.7684021  | 23.54167747 | 3  | 3  | 16.7 |
| 30.62949181 | 30.84550476 | 11 | 11 | 63.3 |
| 27.58262062 | 27.64897156 | 13 | 13 | 64.6 |
| 23.52013397 | 24.36766434 | 4  | 3  | 23.8 |
| 24.97066307 | 25.37497711 | 6  | 6  | 41.7 |
| 23.44543839 | 23.62867546 | 3  | 3  | 6.8  |
| 27.55134773 | 27.34078979 | 19 | 19 | 38.5 |
| 25.78149223 | 25.64979362 | 13 | 13 | 25.5 |
| 23.85186195 | 23.94940186 | 4  | 4  | 24.7 |
| 20.13759041 | 23.54886627 | 5  | 5  | 30.6 |
| 22.04763412 | 22.28424263 | 1  | 1  | 3.3  |
| 28.83926964 | 29.05964088 | 6  | 6  | 27.8 |
| 20.78052711 | 21.92023468 | 2  | 2  | 14.5 |
| 25.61003494 | 25.85440826 | 6  | 4  | 20.7 |
| 22.83385468 | 23.22359848 | 5  | 4  | 19   |
| 24.0230999  | 23.76557159 | 5  | 3  | 22.5 |
| 27.50854492 | 27.59384537 | 6  | 4  | 53.9 |
| 28.60713768 | 28.89264107 | 10 | 8  | 40.7 |



|             |             |    |    |      |
|-------------|-------------|----|----|------|
| 24.28982353 | 23.9699173  | 6  | 4  | 19.1 |
| 32.13705444 | 32.03262329 | 5  | 1  | 45.6 |
| 23.62008476 | 24.32848167 | 7  | 7  | 13.2 |
| 29.48218155 | 29.32879448 | 10 | 10 | 62.4 |
| 30.59601593 | 30.41920853 | 40 | 40 | 62.9 |
| 29.55793381 | 29.30018425 | 30 | 30 | 67.6 |
| 22.93394661 | 23.08108902 | 2  | 2  | 8.8  |
| 22.98217392 | 22.78196716 | 1  | 1  | 14.5 |
| 23.31865501 | 23.30563354 | 7  | 7  | 22.8 |
| 21.36650467 | 24.64521027 | 4  | 4  | 13.9 |
| 21.27815628 | 21.10258293 | 1  | 1  | 6.1  |
| 34.26974869 | 34.43576813 | 9  | 7  | 71.8 |
| 34.37211227 | 34.69010544 | 15 | 9  | 70.7 |
| 25.38534927 | 26.45618057 | 8  | 2  | 57.1 |
| 21.61503983 | 21.7282486  | 1  | 1  | 6.8  |
| 23.54674911 | 24.20523453 | 4  | 4  | 3.8  |
| 22.6093483  | 23.24906158 | 2  | 1  | 4.5  |
| 24.64521027 | 24.13508224 | 2  | 1  | 10.5 |
| 25.48034477 | 24.51701164 | 4  | 3  | 27.7 |
| 21.3771801  | 24.2624855  | 5  | 5  | 35.1 |
| 25.16522598 | 25.25313568 | 9  | 9  | 11.4 |
| 23.08138084 | 23.17878151 | 4  | 4  | 9.8  |
| 21.88877296 | 21.95496559 | 1  | 1  | 1.9  |
| 21.70133972 | 21.61130714 | 2  | 2  | 4.4  |
| 26.84385872 | 26.74393845 | 10 | 10 | 40.3 |
| 25.3894577  | 25.48102188 | 11 | 11 | 39.5 |
| 21.6746521  | 21.14997864 | 1  | 1  | 23.2 |
| 27.94787598 | 27.91302109 | 7  | 7  | 72.2 |
| 24.72842598 | 24.75261497 | 4  | 4  | 39.9 |
| 24.82191849 | 24.28552628 | 11 | 11 | 16   |
| 25.64479637 | 26.45133018 | 5  | 2  | 24.9 |
| 26.12346649 | 26.66084862 | 5  | 4  | 14.3 |
| 29.67720985 | 30.10761642 | 13 | 4  | 37.3 |
| 24.32759094 | 24.74832153 | 10 | 1  | 29.4 |
| 28.96708298 | 29.44415092 | 10 | 3  | 29.7 |
| 24.69396973 | 23.53635216 | 7  | 3  | 57.7 |
| 32.68881226 | 33.29296494 | 8  | 8  | 49.2 |
| 29.87926483 | 30.51559067 | 5  | 1  | 45.6 |
| 32.10121155 | 32.81493759 | 5  | 1  | 45.6 |
| 32.59321213 | 33.06435776 | 13 | 13 | 58.3 |
| 23.92922211 | 24.22398186 | 3  | 1  | 34.6 |

|             |             |    |    |      |
|-------------|-------------|----|----|------|
| 33.37503052 | 32.90390396 | 7  | 2  | 58.1 |
| 27.84828377 | 28.0057106  | 22 | 18 | 27.2 |
| 25.08606339 | 25.48231506 | 14 | 10 | 15.7 |
| 22.61135292 | 22.79439735 | 2  | 2  | 11.3 |
| 29.61185837 | 30.00490761 | 7  | 6  | 39.1 |
| 20.27223206 | 25.25540733 | 2  | 1  | 13.3 |
| 23.69954109 | 23.41066933 | 5  | 5  | 28.3 |
| 22.76229095 | 23.11349869 | 3  | 3  | 10.8 |
| 22.45256996 | 22.77581406 | 1  | 1  | 14.4 |
| 22.68743896 | 23.76931    | 2  | 2  | 5.7  |
| 23.26542091 | 23.64019775 | 3  | 3  | 17.8 |
| 19.65981865 | 22.19026756 | 2  | 2  | 9.2  |
| 25.11036301 | 25.2617321  | 5  | 5  | 27.2 |
| 27.8302002  | 28.34036446 | 16 | 16 | 57.8 |
| 28.06311607 | 28.56808472 | 15 | 15 | 45.1 |
| 26.54031944 | 26.80279541 | 7  | 7  | 24.6 |
| 24.90517998 | 25.06402206 | 5  | 5  | 18.2 |
| 27.1498661  | 27.55127525 | 8  | 7  | 23.7 |
| 22.80829239 | 23.29375839 | 3  | 2  | 18.3 |
| 25.6426506  | 25.30514717 | 6  | 4  | 27.2 |
| 26.65839958 | 27.06486511 | 9  | 3  | 28.3 |
| 23.66644096 | 24.37550735 | 6  | 1  | 18   |
| 28.75146103 | 29.1249218  | 11 | 11 | 35.4 |
| 27.37765884 | 27.63491821 | 9  | 9  | 30.4 |
| 22.6999855  | 22.75686646 | 3  | 3  | 8.1  |
| 27.17864227 | 27.40511131 | 13 | 13 | 25.9 |
| 28.82883835 | 29.02765083 | 21 | 21 | 35.2 |
| 24.83788109 | 19.73979187 | 4  | 4  | 7.8  |
| 24.76045418 | 25.04147148 | 9  | 9  | 15.2 |
| 22.09732056 | 22.63942528 | 4  | 4  | 5.7  |
| 21.27713585 | 21.50833321 | 1  | 1  | 2.8  |
| 22.95004272 | 19.42984581 | 2  | 2  | 8.4  |
| 27.79649734 | 28.05615425 | 14 | 14 | 29.4 |
| 23.40911674 | 23.41596413 | 2  | 2  | 10.4 |
| 24.11418152 | 23.72826958 | 4  | 4  | 18.8 |
| 28.04609108 | 28.11137772 | 16 | 16 | 49.1 |
| 24.27348328 | 21.48929787 | 1  | 1  | 25   |
| 22.16386032 | 22.7507267  | 2  | 2  | 6.5  |
| 27.86932564 | 28.0307579  | 9  | 9  | 41   |
| 25.78623772 | 26.12236214 | 5  | 5  | 20.5 |
| 22.56732368 | 21.1022625  | 6  | 6  | 19.2 |

|             |             |     |     |      |
|-------------|-------------|-----|-----|------|
| 28.19309998 | 28.42258072 | 24  | 18  | 36.4 |
| 29.88310051 | 30.22354507 | 33  | 25  | 46.8 |
| 29.48715401 | 29.82452202 | 33  | 31  | 41.3 |
| 23.96745682 | 24.30361557 | 7   | 5   | 10.4 |
| 25.73153687 | 26.15630341 | 10  | 8   | 18.7 |
| 29.19262886 | 29.15243149 | 25  | 1   | 49.3 |
| 24.94766426 | 24.92211533 | 25  | 1   | 49.4 |
| 27.24970436 | 27.75614548 | 24  | 12  | 42.8 |
| 27.67599869 | 27.84900093 | 24  | 21  | 37.5 |
| 23.59023666 | 24.39460182 | 5   | 3   | 9.3  |
| 29.55753326 | 29.98400116 | 29  | 27  | 49   |
| 30.95213127 | 31.15569115 | 27  | 17  | 44.1 |
| 27.66281891 | 27.89723778 | 18  | 18  | 31.8 |
| 30.10923767 | 29.79344559 | 16  | 16  | 80.4 |
| 26.87677765 | 26.68538666 | 6   | 6   | 53.1 |
| 25.3335743  | 25.03883743 | 5   | 5   | 53.8 |
| 24.4064579  | 24.19557953 | 3   | 3   | 18.9 |
| 29.79901695 | 29.82453728 | 29  | 29  | 61.8 |
| 33.57936478 | 33.42804718 | 136 | 136 | 50.6 |
| 24.92329407 | 24.6857605  | 12  | 10  | 22.2 |
| 27.42981911 | 26.91547394 | 13  | 13  | 31.7 |
| 24.03204155 | 23.83528137 | 8   | 8   | 3.6  |
| 26.54639626 | 26.69803047 | 13  | 13  | 20.3 |
| 22.28265953 | 22.33382607 | 2   | 2   | 18.5 |
| 22.21368217 | 22.57708549 | 2   | 2   | 1.2  |
| 26.19657326 | 26.39941788 | 12  | 12  | 20.1 |
| 22.99800301 | 22.65263557 | 2   | 2   | 4.3  |
| 22.16260147 | 22.81763077 | 1   | 1   | 2.5  |
| 22.46498299 | 22.64332771 | 3   | 3   | 5.8  |
| 27.31163979 | 27.4760685  | 13  | 12  | 34.1 |
| 29.47759438 | 29.25221062 | 17  | 16  | 39.8 |
| 29.2510376  | 29.12907982 | 16  | 16  | 44.8 |
| 26.99323654 | 26.63491821 | 11  | 11  | 43   |
| 22.57621002 | 22.04836655 | 2   | 2   | 11.5 |
| 21.80084801 | 22.16937637 | 1   | 1   | 3.8  |
| 20.71263504 | 21.23286438 | 1   | 1   | 3.2  |
| 24.05796242 | 23.69178963 | 1   | 1   | 6.3  |
| 28.11232376 | 27.52297783 | 9   | 9   | 42.7 |
| 25.92773056 | 25.96835709 | 4   | 4   | 15.2 |
| 22.71053314 | 22.62218666 | 1   | 1   | 3.1  |
| 26.22565651 | 26.26038742 | 4   | 4   | 53.3 |

|             |             |    |    |      |
|-------------|-------------|----|----|------|
| 21.68393135 | 21.76563263 | 3  | 2  | 16.2 |
| 21.73309898 | 21.94688797 | 1  | 1  | 2.1  |
| 24.22457123 | 24.44890785 | 3  | 3  | 13.1 |
| 23.49093819 | 23.36639786 | 4  | 4  | 6.6  |
| 20.07767868 | 22.40043831 | 2  | 2  | 9.7  |
| 27.74599075 | 27.86165619 | 23 | 23 | 37.9 |
| 25.31910324 | 25.37534142 | 6  | 6  | 18.8 |
| 23.66871452 | 23.65818214 | 3  | 3  | 4.3  |
| 26.7395668  | 27.05517197 | 7  | 7  | 51.5 |
| 24.67303467 | 24.62187386 | 3  | 3  | 8.6  |
| 20.69310951 | 21.11400604 | 1  | 1  | 1.6  |
| 21.59231377 | 21.17115021 | 2  | 2  | 2.6  |
| 25.36369324 | 25.86712265 | 15 | 15 | 20.7 |
| 24.43974304 | 24.54392052 | 8  | 8  | 11.5 |
| 22.69865036 | 22.36551666 | 2  | 2  | 4.4  |
| 29.24563026 | 29.22363663 | 46 | 46 | 39.7 |
| 26.98554802 | 27.0411377  | 2  | 2  | 3.7  |
| 22.13739967 | 23.58290672 | 2  | 2  | 11.8 |
| 26.99064255 | 27.24888992 | 7  | 7  | 20.8 |
| 22.76172256 | 23.47209167 | 1  | 1  | 4.7  |
| 27.07917976 | 27.04009247 | 6  | 6  | 54.9 |
| 22.24086189 | 22.98386192 | 5  | 5  | 14.5 |
| 19.25905991 | 21.37057877 | 1  | 1  | 1.2  |
| 23.63478088 | 23.71303368 | 4  | 4  | 5.3  |
| 24.2777462  | 22.06598663 | 11 | 11 | 18.4 |
| 26.0754509  | 25.96525574 | 11 | 11 | 15.4 |
| 25.98982048 | 25.89525032 | 11 | 11 | 14.2 |
| 22.12726212 | 22.50414276 | 3  | 3  | 3    |
| 30.15001106 | 30.0886631  | 33 | 33 | 43.8 |
| 25.8003788  | 25.50479126 | 5  | 5  | 11.8 |
| 27.45771599 | 27.36210442 | 17 | 17 | 20.1 |
| 30.7437458  | 30.68101883 | 28 | 28 | 41.6 |
| 25.21382332 | 24.97749138 | 8  | 8  | 15.1 |
| 26.03956985 | 25.96745682 | 8  | 8  | 16   |
| 26.81066132 | 26.66234398 | 1  | 1  | 1.1  |
| 26.38993454 | 25.80314064 | 10 | 10 | 20   |
| 25.35006142 | 24.55543518 | 7  | 7  | 10.7 |
| 25.45029259 | 25.02428436 | 10 | 10 | 12.2 |
| 24.21645355 | 24.75026512 | 5  | 5  | 38.9 |
| 26.49909973 | 26.38015556 | 20 | 15 | 9.8  |
| 23.00461769 | 22.86014748 | 6  | 2  | 2.2  |

|             |             |    |    |      |
|-------------|-------------|----|----|------|
| 26.99075127 | 26.83569145 | 7  | 7  | 34.4 |
| 23.63832092 | 22.79576492 | 2  | 2  | 3.6  |
| 23.93795586 | 23.60749817 | 3  | 3  | 7    |
| 23.89568901 | 23.69954109 | 4  | 2  | 7.5  |
| 27.40770721 | 27.3174305  | 16 | 16 | 30.7 |
| 24.56092453 | 24.38297844 | 8  | 8  | 18.7 |
| 24.88604355 | 25.27859688 | 1  | 1  | 2.9  |
| 23.27951813 | 23.48910141 | 2  | 2  | 10.5 |
| 26.42451096 | 26.27248764 | 1  | 1  | 10.4 |
| 25.20985031 | 25.04942894 | 6  | 6  | 16.9 |
| 20.8363533  | 23.37158966 | 2  | 2  | 9.3  |
| 24.17561913 | 24.20873451 | 4  | 4  | 8.8  |
| 25.41280365 | 25.70956612 | 8  | 8  | 13.4 |
| 20.27120209 | 22.92942047 | 2  | 2  | 2.4  |
| 22.70015526 | 23.67476082 | 3  | 2  | 2.2  |
| 22.18546677 | 21.92019844 | 1  | 1  | 2.7  |
| 24.28686714 | 23.30883026 | 4  | 1  | 4.5  |
| 25.10717392 | 25.01601601 | 9  | 6  | 13.2 |
| 24.17790031 | 24.05233574 | 6  | 5  | 16.8 |
| 21.7605648  | 27.57427025 | 7  | 4  | 46.4 |
| 24.36919594 | 24.52390671 | 3  | 3  | 1    |
| 26.79761124 | 27.02104568 | 7  | 7  | 23.8 |
| 25.05845833 | 25.38775063 | 5  | 5  | 19.6 |
| 24.70503807 | 24.89003944 | 5  | 2  | 14.6 |
| 24.49759293 | 24.36746407 | 4  | 4  | 34   |
| 29.95185471 | 29.57546043 | 26 | 4  | 55.1 |
| 25.38419724 | 25.303545   | 22 | 3  | 48.3 |
| 26.63713264 | 25.78895187 | 2  | 2  | 12.6 |
| 25.87361336 | 25.36192131 | 4  | 4  | 59.3 |
| 25.48615837 | 24.4361248  | 2  | 2  | 66.1 |
| 23.22636604 | 23.92515182 | 1  | 1  | 17.3 |
| 29.14435577 | 29.78797913 | 4  | 4  | 98.9 |
| 21.13458252 | 21.41679001 | 2  | 2  | 3.4  |
| 22.61243248 | 20.20228195 | 1  | 1  | 4.8  |
| 22.74384117 | 22.87618256 | 2  | 2  | 6.6  |
| 26.06085205 | 26.02995872 | 22 | 22 | 10.7 |
| 28.60179901 | 28.49560356 | 25 | 25 | 18.9 |
| 30.0496006  | 29.94083786 | 70 | 70 | 30.4 |
| 24.72254944 | 25.87719917 | 5  | 5  | 3.5  |
| 30.94209671 | 30.72590256 | 74 | 74 | 52.1 |
| 30.0712471  | 29.88425064 | 47 | 47 | 39.4 |

|             |             |    |    |      |
|-------------|-------------|----|----|------|
| 23.19842911 | 20.00862885 | 2  | 2  | 6.4  |
| 24.56714821 | 24.94534302 | 3  | 3  | 6.5  |
| 22.53744125 | 23.24260712 | 3  | 3  | 23.6 |
| 23.22424698 | 22.98471451 | 1  | 1  | 22   |
| 23.05210304 | 22.84168625 | 2  | 2  | 10.9 |
| 25.10809135 | 25.20101357 | 9  | 9  | 28.5 |
| 19.99973679 | 21.04066086 | 1  | 1  | 0.8  |
| 24.4932003  | 24.42066193 | 6  | 5  | 25.9 |
| 25.25932693 | 25.65097046 | 12 | 7  | 28.1 |
| 27.85120583 | 27.67586517 | 20 | 20 | 43.7 |
| 29.43430138 | 29.40975189 | 22 | 20 | 75.3 |
| 27.3533802  | 27.15884781 | 16 | 15 | 60.2 |
| 20.1571579  | 23.65774536 | 1  | 1  | 3.3  |
| 24.19550514 | 24.55403137 | 5  | 5  | 12.5 |
| 21.77019691 | 21.29815674 | 2  | 2  | 4.8  |
| 25.72496986 | 25.76585007 | 12 | 12 | 30.4 |
| 24.0789566  | 23.04856491 | 8  | 8  | 39.1 |
| 31.68745804 | 31.84404564 | 11 | 11 | 86.7 |
| 25.76615334 | 25.51301003 | 6  | 6  | 27.3 |
| 23.6905117  | 23.65937996 | 2  | 2  | 7.1  |
| 27.22333717 | 27.16566658 | 2  | 2  | 4.6  |
| 23.77575302 | 23.71156311 | 3  | 3  | 4.6  |
| 27.31665421 | 27.33841133 | 14 | 9  | 55.7 |
| 26.55543518 | 26.75391579 | 13 | 8  | 47.8 |
| 22.19499397 | 22.56827354 | 2  | 2  | 8.6  |
| 26.01620674 | 25.97513199 | 13 | 13 | 29.9 |
| 25.1906147  | 26.03223038 | 3  | 3  | 12.2 |
| 24.20806503 | 24.24474144 | 4  | 4  | 11.7 |
| 28.95828629 | 28.68294525 | 19 | 19 | 54.2 |
| 23.69943428 | 23.71952248 | 1  | 1  | 2.8  |
| 31.33718872 | 31.45522881 | 44 | 44 | 62.4 |
| 28.12080002 | 28.41868591 | 17 | 16 | 27.9 |
| 25.81452942 | 25.83877182 | 8  | 7  | 16.1 |
| 28.42205811 | 28.42358208 | 17 | 17 | 29.7 |
| 24.6673069  | 24.32759094 | 6  | 6  | 6.1  |
| 25.44565964 | 25.5480442  | 12 | 12 | 16.6 |
| 30.15073776 | 29.97732735 | 19 | 19 | 47.8 |
| 23.00492668 | 22.26367569 | 4  | 4  | 6.4  |
| 21.33821487 | 21.58389473 | 1  | 1  | 3.6  |
| 31.19771004 | 30.98352432 | 35 | 35 | 61.8 |
| 28.09592247 | 28.16216469 | 37 | 37 | 11.4 |

|             |             |    |    |      |
|-------------|-------------|----|----|------|
| 24.28637314 | 24.80842972 | 3  | 3  | 9.2  |
| 26.43133545 | 26.17924881 | 18 | 18 | 19   |
| 27.79631233 | 27.78200531 | 8  | 8  | 25.1 |
| 23.04071236 | 22.47850037 | 1  | 1  | 2.1  |
| 24.99576187 | 24.53160095 | 3  | 3  | 7.8  |
| 20.99876785 | 24.14258003 | 1  | 1  | 2.7  |
| 26.40179634 | 26.7701416  | 6  | 6  | 29.6 |
| 25.29572105 | 24.78895187 | 3  | 3  | 10.2 |
| 20.37264824 | 22.47231483 | 1  | 1  | 7.8  |
| 22.44384575 | 22.06989098 | 1  | 1  | 20.9 |
| 20.88025856 | 24.73148537 | 1  | 1  | 24.3 |
| 27.20228386 | 27.50188065 | 13 | 13 | 31.3 |
| 28.72335052 | 28.84487724 | 21 | 21 | 21.8 |
| 23.37716293 | 23.41403008 | 3  | 3  | 2    |
| 24.08869362 | 23.75256348 | 4  | 4  | 5    |
| 31.03996277 | 30.81038666 | 51 | 51 | 40.6 |
| 21.88996506 | 22.68816566 | 1  | 1  | 3.4  |
| 23.16715813 | 23.63422585 | 1  | 1  | 3.2  |
| 32.67234039 | 32.65172577 | 16 | 10 | 42.9 |
| 25.68346024 | 25.50017929 | 3  | 3  | 17.6 |
| 23.3436718  | 24.02005005 | 1  | 1  | 15.7 |
| 24.32161713 | 24.24539566 | 1  | 1  | 13.7 |
| 26.70332146 | 26.17369461 | 7  | 7  | 63.8 |
| 24.91300964 | 24.86717033 | 4  | 4  | 33.3 |
| 20.98488808 | 21.3224411  | 1  | 1  | 10.5 |
| 24.32642555 | 24.60110474 | 3  | 3  | 19.4 |
| 25.12482834 | 24.45381355 | 5  | 5  | 1.1  |
| 25.58385468 | 25.85429001 | 5  | 5  | 30.7 |
| 24.02816772 | 23.82444572 | 6  | 6  | 8.1  |
| 24.95969582 | 24.93584442 | 1  | 1  | 9.5  |
| 24.28750038 | 23.87820625 | 2  | 2  | 6.5  |
| 26.8426609  | 26.82844543 | 10 | 10 | 31.9 |
| 24.98949623 | 25.58431244 | 14 | 12 | 6.2  |
| 27.79315186 | 27.97634506 | 20 | 18 | 13.1 |
| 23.62778473 | 23.83364296 | 2  | 1  | 17.4 |
| 24.53391838 | 25.00393105 | 2  | 1  | 16.8 |
| 22.75470734 | 22.62640381 | 2  | 2  | 2.6  |
| 25.02034569 | 24.92506218 | 7  | 7  | 26.7 |
| 20.5165863  | 21.23157501 | 2  | 2  | 9.9  |
| 22.88072968 | 22.60634613 | 2  | 2  | 8.1  |
| 20.23883247 | 23.98137283 | 1  | 1  | 0.5  |

|             |             |    |    |      |
|-------------|-------------|----|----|------|
| 26.62421799 | 26.71397781 | 16 | 16 | 23.8 |
| 21.0357151  | 21.3828373  | 2  | 2  | 11.4 |
| 26.35013008 | 26.02462196 | 12 | 9  | 54.5 |
| 21.88747597 | 21.94313622 | 2  | 2  | 15.5 |
| 24.52713203 | 24.41377068 | 8  | 5  | 34.2 |
| 23.81665421 | 23.95153809 | 3  | 3  | 10.7 |
| 19.095047   | 20.00284576 | 3  | 3  | 5.1  |
| 21.27430916 | 22.91179466 | 1  | 1  | 4    |
| 21.20788574 | 21.96395111 | 2  | 2  | 6.6  |
| 26.83893967 | 26.97880173 | 10 | 10 | 21.2 |
| 24.31375122 | 25.41709137 | 6  | 6  | 52.6 |
| 19.93341255 | 22.11476898 | 1  | 1  | 5.6  |
| 24.26284409 | 24.0202198  | 4  | 4  | 16.3 |
| 21.20741081 | 21.02715492 | 1  | 1  | 4.1  |
| 25.24263573 | 25.06287003 | 4  | 1  | 11.4 |
| 21.64838409 | 22.04550171 | 1  | 1  | 4.7  |
| 20.30760765 | 15.90745449 | 8  | 8  | 41.5 |
| 25.15085411 | 25.42815781 | 8  | 8  | 16.2 |
| 25.24633789 | 25.41147804 | 9  | 9  | 19.9 |
| 23.21001434 | 22.93452263 | 2  | 2  | 27   |
| 19.69798088 | 23.7091465  | 1  | 1  | 4.8  |
| 22.48044968 | 22.93962479 | 2  | 2  | 57.1 |
| 27.42934036 | 28.56768608 | 8  | 8  | 37.4 |
| 23.59000778 | 23.50530624 | 3  | 3  | 20.4 |
| 28.50058937 | 28.97489738 | 11 | 11 | 44   |
| 29.95532227 | 29.94181633 | 17 | 17 | 63.6 |
| 23.67970848 | 23.29726028 | 3  | 3  | 36.6 |
| 27.3765831  | 27.66566849 | 18 | 18 | 59.3 |
| 25.39385033 | 25.59109306 | 7  | 7  | 19.2 |
| 25.42700768 | 25.21597099 | 12 | 12 | 56.3 |
| 23.07595825 | 20.07045364 | 1  | 1  | 1.1  |
| 22.53900528 | 22.5685997  | 4  | 4  | 20.5 |
| 22.56527901 | 19.39546585 | 1  | 1  | 3.6  |
| 25.8725338  | 26.07060814 | 3  | 3  | 20.8 |
| 31.02953529 | 30.72906876 | 8  | 8  | 50.2 |
| 26.89469528 | 26.94480705 | 5  | 5  | 30.5 |
| 29.70328903 | 29.37736893 | 24 | 24 | 55.4 |
| 22.65824699 | 22.73991203 | 2  | 2  | 6    |
| 24.49460411 | 24.50688171 | 2  | 2  | 23.1 |
| 25.00401688 | 25.26899338 | 4  | 4  | 40   |
| 22.27951813 | 21.90212822 | 2  | 2  | 24.8 |



|             |             |    |    |      |
|-------------|-------------|----|----|------|
| 24.31547928 | 23.54321289 | 9  | 9  | 12.1 |
| 24.4952755  | 24.17378998 | 3  | 3  | 4.3  |
| 20.60767365 | 21.41977501 | 3  | 3  | 8.2  |
| 27.88227081 | 28.19432068 | 5  | 5  | 71.3 |
| 24.41241455 | 24.91583824 | 1  | 1  | 42.1 |
| 22.89489555 | 22.82964134 | 1  | 1  | 5.5  |
| 21.15127945 | 20.27824783 | 3  | 3  | 9.9  |
| 20.17474937 | 20.1324501  | 1  | 1  | 16   |
| 21.30641365 | 21.59395599 | 2  | 2  | 3.4  |
| 24.36292458 | 24.71983719 | 1  | 1  | 2.4  |
| 22.62077904 | 22.99915504 | 3  | 3  | 5.8  |
| 24.61397362 | 25.09796333 | 1  | 1  | 13.8 |
| 25.36312485 | 24.80242729 | 5  | 5  | 54.1 |
| 26.15551186 | 26.14965248 | 6  | 6  | 37   |
| 23.17972374 | 23.72119331 | 5  | 5  | 17.8 |
| 22.68722534 | 22.72696114 | 2  | 2  | 8.4  |
| 23.94333267 | 24.42988396 | 7  | 7  | 24.6 |
| 25.98851967 | 26.16899872 | 10 | 10 | 10.7 |
| 22.75103188 | 23.08242035 | 4  | 4  | 3.9  |
| 23.52683258 | 23.8133316  | 2  | 2  | 9.6  |
| 24.13147736 | 23.68987083 | 1  | 1  | 7.6  |
| 22.44637299 | 22.51270294 | 1  | 1  | 6    |
| 25.37891579 | 24.89966011 | 3  | 3  | 56.9 |
| 24.1059742  | 23.9536705  | 4  | 4  | 6.1  |
| 30.20734406 | 30.24558449 | 35 | 24 | 54.9 |
| 23.49765396 | 23.20964241 | 3  | 3  | 20.7 |
| 25.30598259 | 25.45309067 | 5  | 5  | 34.4 |
| 26.36669731 | 26.24403381 | 9  | 9  | 47   |
| 24.86632156 | 25.20116234 | 6  | 6  | 26.6 |
| 26.11048317 | 26.16557121 | 1  | 1  | 14.9 |
| 27.40673447 | 27.5120163  | 10 | 10 | 44.9 |
| 28.79968071 | 28.79426765 | 7  | 7  | 44.9 |
| 23.08203125 | 23.5926342  | 3  | 3  | 15.6 |
| 25.14829445 | 25.28552628 | 9  | 9  | 14.3 |
| 23.33483696 | 22.44103622 | 5  | 5  | 6.6  |
| 21.62511063 | 21.93556595 | 1  | 1  | 4.4  |
| 22.18125725 | 21.71347427 | 2  | 2  | 5.4  |
| 21.01553345 | 21.94027138 | 4  | 4  | 2    |
| 27.32731628 | 27.09275055 | 6  | 6  | 64.4 |
| 22.28686714 | 21.54373169 | 2  | 2  | 9.5  |
| 24.75343132 | 24.32532883 | 4  | 4  | 26.6 |

|             |             |     |    |      |
|-------------|-------------|-----|----|------|
| 28.7972393  | 28.45226669 | 27  | 17 | 28   |
| 23.27355385 | 23.85214806 | 5   | 5  | 9.4  |
| 26.99193954 | 27.0500946  | 13  | 13 | 25.2 |
| 24.2483654  | 24.22655678 | 4   | 4  | 13.4 |
| 25.39897919 | 25.43459892 | 10  | 10 | 10.4 |
| 22.32369423 | 22.66305542 | 1   | 1  | 19.4 |
| 21.1126709  | 20.68654251 | 1   | 1  | 6    |
| 20.7969017  | 23.16642189 | 2   | 2  | 5.3  |
| 30.1278019  | 30.23888397 | 85  | 57 | 45.3 |
| 34.52280045 | 34.52938843 | 160 | 4  | 61.3 |
| 23.13952446 | 23.26956558 | 157 | 1  | 62.3 |
| 26.37293625 | 27.07958794 | 15  | 2  | 6.3  |
| 21.95048714 | 26.06321907 | 85  | 18 | 46.8 |
| 29.02236938 | 29.13836288 | 75  | 50 | 39.9 |
| 26.63837624 | 26.89075851 | 13  | 13 | 75.5 |
| 27.32894325 | 27.34146881 | 11  | 4  | 51.2 |
| 32.08774567 | 31.89254761 | 11  | 1  | 78.1 |
| 30.48433304 | 30.67328835 | 13  | 6  | 80.2 |
| 30.23591995 | 30.30410767 | 38  | 11 | 40.9 |
| 21.57957458 | 21.23767471 | 2   | 2  | 1.9  |
| 22.48136139 | 22.89378357 | 1   | 1  | 2.4  |
| 30.14843559 | 30.13418198 | 46  | 45 | 47.1 |
| 25.4388237  | 25.03800011 | 12  | 12 | 15.9 |
| 22.02384377 | 21.42121506 | 2   | 2  | 1.4  |
| 27.34341812 | 27.40145493 | 23  | 23 | 14.6 |
| 22.58865929 | 23.33319855 | 4   | 4  | 16.3 |
| 21.28268814 | 20.71908379 | 1   | 1  | 7.7  |
| 24.24394417 | 24.60138893 | 4   | 4  | 19   |
| 28.37223053 | 28.4814682  | 4   | 4  | 12.2 |
| 24.83725548 | 24.2286129  | 2   | 2  | 14.8 |
| 26.15726852 | 23.72171593 | 7   | 7  | 40.1 |
| 24.2992897  | 23.38363647 | 1   | 1  | 16.4 |
| 20.41049576 | 22.34594727 | 2   | 2  | 13.6 |
| 20.43052292 | 22.58744621 | 1   | 1  | 1.3  |
| 24.9271431  | 24.79009628 | 8   | 7  | 15.4 |
| 24.72624397 | 24.36138535 | 3   | 3  | 19.1 |
| 21.67529869 | 22.44649887 | 2   | 2  | 3.7  |
| 24.48750687 | 24.72946358 | 4   | 4  | 14.7 |
| 24.58938026 | 24.86613274 | 6   | 6  | 20.8 |
| 25.6995945  | 25.74573517 | 5   | 5  | 14.8 |
| 25.0845623  | 24.92134285 | 6   | 6  | 24   |

|             |             |    |    |      |
|-------------|-------------|----|----|------|
| 24.17820549 | 24.87347221 | 3  | 3  | 13.6 |
| 23.27739143 | 23.85585785 | 3  | 3  | 9.9  |
| 23.60218239 | 23.868536   | 3  | 3  | 5.4  |
| 21.42892075 | 20.26485252 | 2  | 2  | 10.4 |
| 25.76988983 | 25.26806641 | 6  | 6  | 12.1 |
| 24.14918709 | 24.09667587 | 1  | 1  | 6.9  |
| 24.85714149 | 25.06726837 | 10 | 10 | 17.2 |
| 27.22140312 | 27.41924858 | 8  | 8  | 13.7 |
| 21.59618759 | 22.78992844 | 2  | 2  | 3.7  |
| 25.26838684 | 25.53174973 | 6  | 6  | 31.5 |
| 27.25907707 | 27.27444267 | 10 | 10 | 51.3 |
| 21.43862724 | 22.41495895 | 1  | 1  | 14.3 |
| 26.66790199 | 26.67667198 | 12 | 12 | 51.5 |
| 22.55229568 | 23.06009293 | 2  | 2  | 24.1 |
| 25.10984421 | 24.99614906 | 7  | 7  | 52.4 |
| 24.7200985  | 24.74196053 | 3  | 3  | 23.6 |
| 22.37105942 | 22.55208397 | 3  | 3  | 25.3 |
| 23.79431725 | 24.14312553 | 3  | 3  | 50   |
| 26.32675171 | 26.59306145 | 5  | 5  | 68.3 |
| 21.33783722 | 20.04730225 | 4  | 4  | 50.9 |
| 25.10333633 | 24.86966705 | 4  | 4  | 33.6 |
| 26.08762169 | 26.33934593 | 7  | 7  | 57   |
| 26.12393951 | 26.12976837 | 13 | 13 | 48.5 |
| 19.8824501  | 22.08579445 | 1  | 1  | 8.1  |
| 20.83174896 | 20.86234283 | 1  | 1  | 6.5  |
| 25.38301086 | 25.4715023  | 2  | 2  | 47.4 |
| 25.1898613  | 24.9440918  | 4  | 4  | 30.1 |
| 23.93202019 | 23.86126518 | 3  | 3  | 33.7 |
| 24.92374802 | 24.95611    | 4  | 4  | 38.8 |
| 23.29977798 | 22.98849869 | 3  | 3  | 16.9 |
| 20.69064713 | 22.41902924 | 3  | 3  | 32   |
| 20.76264954 | 23.78216743 | 3  | 3  | 14.6 |
| 24.38376808 | 24.7882061  | 6  | 6  | 31.3 |
| 24.75210571 | 24.76339531 | 6  | 6  | 50.8 |
| 27.12849045 | 27.13858223 | 24 | 24 | 45.9 |
| 26.54062843 | 26.37114143 | 10 | 10 | 24.8 |
| 25.90361786 | 25.52659416 | 12 | 12 | 42.6 |
| 24.21230316 | 21.56202888 | 3  | 3  | 29.7 |
| 25.10193443 | 25.31202126 | 4  | 4  | 41.5 |
| 18.68473816 | 24.12202454 | 5  | 5  | 60.3 |
| 24.42636871 | 24.70044136 | 3  | 3  | 26.8 |

|             |             |    |    |      |
|-------------|-------------|----|----|------|
| 25.29284477 | 25.55101013 | 3  | 3  | 17.9 |
| 26.55776024 | 26.71567917 | 12 | 12 | 39.7 |
| 24.71795654 | 24.74093246 | 5  | 5  | 27.4 |
| 21.12603378 | 20.7472496  | 2  | 2  | 27.9 |
| 23.28206635 | 20.54380417 | 5  | 4  | 29.3 |
| 26.70120811 | 26.96201515 | 14 | 11 | 19.5 |
| 25.35507965 | 24.53362083 | 1  | 1  | 17.3 |
| 20.54158592 | 18.72280693 | 11 | 9  | 15.1 |
| 27.04082489 | 27.41126823 | 1  | 1  | 1.7  |
| 23.47654915 | 23.04057884 | 5  | 5  | 4.1  |
| 23.020998   | 22.73332787 | 1  | 1  | 1.6  |
| 21.01249123 | 22.28430367 | 1  | 1  | 2.6  |
| 22.40085602 | 22.33649826 | 2  | 2  | 6.5  |
| 23.79986    | 23.44290924 | 2  | 2  | 12.8 |
| 22.38811111 | 22.89663315 | 2  | 2  | 9.4  |
| 23.34543419 | 22.73624229 | 5  | 5  | 12.1 |
| 24.00247383 | 24.92011642 | 4  | 4  | 50   |
| 28.49773598 | 28.69012451 | 28 | 27 | 33.3 |
| 26.58204651 | 26.56095505 | 14 | 13 | 12.9 |
| 22.65256882 | 22.63118744 | 2  | 2  | 8    |
| 23.625      | 23.74345016 | 1  | 1  | 13.2 |
| 24.72707558 | 24.83566666 | 6  | 6  | 32.4 |
| 30.45718765 | 30.5709095  | 6  | 6  | 33.3 |
| 22.91469955 | 22.77723885 | 4  | 4  | 8.6  |
| 24.83311081 | 25.03229332 | 9  | 4  | 66.4 |
| 28.53099823 | 28.90058136 | 10 | 5  | 73.7 |
| 21.38916206 | 21.93560219 | 3  | 3  | 23.1 |
| 22.12789154 | 22.97886276 | 2  | 2  | 10   |
| 24.94172096 | 24.17592239 | 3  | 3  | 11.3 |
| 26.94637108 | 27.09928703 | 23 | 23 | 28.4 |
| 26.03647041 | 26.41844368 | 7  | 7  | 25.8 |
| 23.45776176 | 23.34610939 | 4  | 4  | 12.3 |
| 25.24368858 | 24.58147049 | 4  | 4  | 20.1 |
| 24.05059242 | 21.87037849 | 1  | 1  | 6.1  |
| 25.98934364 | 26.07432938 | 12 | 12 | 23.2 |
| 26.16750526 | 26.39700508 | 5  | 5  | 29.8 |
| 29.64233971 | 29.40334511 | 21 | 2  | 41.1 |
| 24.89901352 | 24.12249947 | 20 | 1  | 41.2 |
| 25.3963356  | 25.60580254 | 4  | 4  | 17.7 |
| 24.707304   | 24.74934578 | 6  | 6  | 31   |
| 23.98085022 | 24.48271561 | 3  | 3  | 18.2 |

|             |             |    |    |      |
|-------------|-------------|----|----|------|
| 25.10393524 | 24.77831268 | 8  | 8  | 15.9 |
| 24.62393951 | 24.53463173 | 4  | 4  | 15.4 |
| 25.61832047 | 25.53531265 | 4  | 4  | 36.5 |
| 24.43961716 | 24.66773987 | 3  | 3  | 6.2  |
| 26.17767334 | 25.74383545 | 8  | 8  | 16.6 |
| 24.99718475 | 24.83190346 | 5  | 5  | 16.6 |
| 22.90760231 | 22.6374588  | 2  | 2  | 6    |
| 24.69008446 | 24.74082947 | 2  | 2  | 9    |
| 22.78823471 | 22.08011246 | 1  | 1  | 9.1  |
| 22.73727417 | 22.60977554 | 3  | 3  | 12.3 |
| 21.06657791 | 20.57348442 | 1  | 1  | 5    |
| 24.67648315 | 24.87347221 | 5  | 5  | 33.5 |
| 24.43879318 | 24.66497803 | 1  | 1  | 2.2  |
| 20.40907478 | 20.92223358 | 1  | 1  | 5.8  |
| 23.69125748 | 23.50154495 | 6  | 6  | 5.6  |
| 22.7442112  | 23.42956352 | 3  | 3  | 4.6  |
| 20.99893188 | 22.43979454 | 3  | 3  | 3.6  |
| 21.70660591 | 22.64790154 | 1  | 1  | 2.1  |
| 20.80217361 | 22.52762032 | 5  | 5  | 9.5  |
| 26.63561058 | 27.05289459 | 5  | 5  | 70.9 |
| 25.83477592 | 25.2475338  | 1  | 1  | 0.9  |
| 28.10604477 | 28.05548286 | 16 | 16 | 64.7 |
| 20.09412384 | 22.96358109 | 3  | 3  | 22.2 |
| 29.67429924 | 29.45567894 | 50 | 50 | 52.9 |
| 32.52880478 | 32.36149979 | 15 | 15 | 43   |
| 26.10395622 | 26.25405502 | 8  | 8  | 27.5 |
| 25.37954521 | 25.66928291 | 1  | 1  | 4    |
| 25.45654106 | 25.70107651 | 12 | 12 | 20   |
| 24.00393105 | 24.45481682 | 2  | 2  | 11.6 |
| 23.41157532 | 24.16568756 | 3  | 3  | 8    |
| 22.16435242 | 22.54919624 | 3  | 3  | 4.9  |
| 23.28206635 | 22.80301857 | 2  | 2  | 5.1  |
| 22.52214622 | 22.332407   | 2  | 2  | 3.1  |
| 24.42053413 | 24.70998764 | 1  | 1  | 8.1  |
| 25.49237442 | 24.98815155 | 6  | 6  | 29.3 |
| 26.13110352 | 26.32340431 | 7  | 7  | 28   |
| 28.117733   | 28.26584244 | 20 | 20 | 59   |
| 23.68880463 | 23.71261406 | 3  | 3  | 5.1  |
| 28.8723526  | 28.98636246 | 24 | 24 | 49.3 |
| 24.27255821 | 25.14008522 | 5  | 5  | 19.7 |
| 26.59690475 | 26.61680794 | 10 | 10 | 20.3 |

|             |             |    |    |      |
|-------------|-------------|----|----|------|
| 20.52433395 | 24.09988976 | 1  | 1  | 5.5  |
| 25.45845032 | 25.63250732 | 4  | 4  | 10.3 |
| 23.77253532 | 24.15792274 | 6  | 6  | 16.8 |
| 25.90419197 | 26.22714424 | 4  | 4  | 31.4 |
| 24.58089638 | 24.26148224 | 6  | 6  | 20   |
| 23.43402672 | 25.00829887 | 6  | 6  | 19.8 |
| 22.9624691  | 23.23599243 | 1  | 1  | 2.6  |
| 22.27289963 | 22.29182053 | 1  | 1  | 3.2  |
| 24.08009529 | 23.08967972 | 2  | 2  | 4.1  |
| 23.84584618 | 23.77223396 | 3  | 3  | 10.5 |
| 28.95343781 | 29.20438576 | 13 | 13 | 84.1 |
| 20.37506866 | 20.31882095 | 2  | 2  | 3.9  |
| 25.37775803 | 25.0567646  | 4  | 4  | 17.6 |
| 27.81457901 | 27.77574158 | 13 | 13 | 42.7 |
| 21.48355293 | 20.91481972 | 2  | 2  | 9.3  |
| 25.72163773 | 25.73495102 | 4  | 4  | 27   |
| 20.25810623 | 20.54462814 | 1  | 1  | 1.2  |
| 26.15443039 | 26.15247917 | 9  | 9  | 20.6 |
| 27.84983635 | 28.05765343 | 20 | 20 | 25.1 |
| 27.52738571 | 27.82304764 | 9  | 8  | 42.7 |
| 25.95480156 | 26.29946327 | 5  | 4  | 22.4 |
| 24.56307983 | 25.19381332 | 12 | 12 | 19.3 |
| 25.56923676 | 25.70025635 | 11 | 11 | 27.9 |
| 25.09353638 | 25.19117928 | 12 | 11 | 30.5 |
| 25.95571136 | 26.10839081 | 8  | 8  | 61.2 |
| 23.95491219 | 23.92940331 | 4  | 4  | 11.5 |
| 22.51296806 | 22.6575489  | 2  | 2  | 5.1  |
| 21.29636574 | 22.45159912 | 2  | 2  | 6.5  |
| 18.41363525 | 24.36899567 | 3  | 3  | 23.1 |
| 24.93853951 | 25.14160728 | 4  | 4  | 37.3 |
| 26.1877861  | 26.49185562 | 7  | 7  | 55.6 |
| 27.43849182 | 27.53051376 | 24 | 24 | 37.9 |
| 22.87880516 | 23.32635689 | 2  | 2  | 15.5 |
| 25.56470871 | 25.12955093 | 8  | 8  | 10.3 |
| 23.03771591 | 22.22101974 | 1  | 1  | 2.4  |
| 24.29628181 | 24.35231972 | 6  | 6  | 8.7  |
| 27.17902184 | 27.22765923 | 17 | 17 | 50.5 |
| 27.87314415 | 27.80661201 | 15 | 15 | 64.6 |
| 21.72920418 | 23.29642105 | 3  | 3  | 8.4  |
| 30.07533455 | 30.28471565 | 29 | 29 | 54.5 |
| 26.58677673 | 26.93550873 | 14 | 14 | 25.1 |

|             |             |    |    |      |
|-------------|-------------|----|----|------|
| 22.40314674 | 22.3698349  | 3  | 3  | 10.8 |
| 27.17016411 | 27.32156563 | 9  | 9  | 29.3 |
| 22.22450638 | 21.90811539 | 2  | 2  | 11.3 |
| 24.48406792 | 24.0284214  | 2  | 2  | 6.7  |
| 29.19706726 | 29.05305099 | 21 | 21 | 83.5 |
| 28.13804626 | 28.23886108 | 19 | 19 | 80.4 |
| 26.80415154 | 26.5631237  | 10 | 10 | 45.5 |
| 21.6687355  | 21.35180855 | 1  | 1  | 1.7  |
| 22.35764503 | 21.27963066 | 3  | 2  | 4.1  |
| 23.91314697 | 24.12597084 | 4  | 3  | 4.6  |
| 21.92911339 | 21.24816895 | 2  | 2  | 4.9  |
| 25.34698868 | 25.5872345  | 6  | 6  | 38.8 |
| 24.99589157 | 25.4522419  | 3  | 3  | 36.9 |
| 29.22673988 | 29.51267433 | 11 | 11 | 89.3 |
| 24.17516136 | 24.56587219 | 3  | 3  | 11.3 |
| 22.35428619 | 22.41198921 | 1  | 1  | 2    |
| 21.04200745 | 21.32465553 | 1  | 1  | 14.5 |
| 20.20132065 | 19.6278286  | 1  | 1  | 2.2  |
| 25.64449501 | 25.01831055 | 3  | 3  | 28.6 |
| 23.98285294 | 24.0484314  | 2  | 2  | 16.9 |
| 23.71826935 | 23.84047699 | 3  | 3  | 33.1 |
| 23.5114727  | 22.80897903 | 2  | 2  | 26.8 |
| 25.43574333 | 25.71759033 | 13 | 9  | 27.2 |
| 25.42473602 | 25.22280312 | 12 | 9  | 22.8 |
| 27.40770721 | 27.48046684 | 15 | 13 | 25.8 |
| 28.50578308 | 28.42278099 | 14 | 11 | 71.3 |
| 26.89804459 | 27.03674316 | 16 | 16 | 53.2 |
| 28.79371071 | 28.81857681 | 21 | 21 | 65.9 |
| 28.08283806 | 28.00635147 | 11 | 11 | 83.7 |
| 27.84864235 | 27.9153595  | 13 | 13 | 42   |
| 21.24858284 | 22.06506538 | 1  | 1  | 2.9  |
| 23.02115059 | 23.338377   | 3  | 3  | 7.7  |
| 30.64211655 | 30.52906227 | 27 | 27 | 63.5 |
| 24.4719677  | 24.64987564 | 4  | 4  | 18.1 |
| 26.42330933 | 26.57159615 | 7  | 6  | 41   |
| 21.58631516 | 24.29487991 | 2  | 1  | 10.6 |
| 27.82584    | 27.68143845 | 11 | 11 | 64   |
| 26.55162621 | 26.49664688 | 8  | 8  | 32.8 |
| 22.02560234 | 22.97272301 | 2  | 2  | 4.7  |
| 20.90168571 | 20.04300117 | 1  | 1  | 4.5  |
| 26.018013   | 25.47156525 | 10 | 10 | 51.9 |

|             |             |    |    |      |
|-------------|-------------|----|----|------|
| 23.30284882 | 23.71229935 | 3  | 3  | 2.5  |
| 27.29228401 | 27.09938812 | 14 | 14 | 31.3 |
| 22.60272598 | 23.06880951 | 2  | 2  | 7.9  |
| 23.07465172 | 23.60229492 | 1  | 1  | 9.1  |
| 21.73314095 | 21.27991486 | 1  | 1  | 2.2  |
| 21.37528038 | 21.36340523 | 1  | 1  | 4.1  |
| 25.39600754 | 25.14584923 | 6  | 4  | 25.1 |
| 22.61164474 | 23.01724815 | 3  | 1  | 14.8 |
| 24.52599716 | 24.22014809 | 5  | 5  | 9.2  |
| 31.23859787 | 31.2536087  | 35 | 4  | 75   |
| 28.00801086 | 27.61097908 | 34 | 3  | 73.8 |
| 22.10251999 | 22.07626724 | 2  | 2  | 2.1  |
| 24.47407341 | 23.68645668 | 5  | 5  | 10.4 |
| 22.32083321 | 23.02457047 | 2  | 2  | 3.3  |
| 23.98763275 | 23.67454529 | 5  | 5  | 7    |
| 27.47668839 | 27.44094849 | 20 | 20 | 42.3 |
| 28.91868973 | 29.02152252 | 70 | 68 | 20.1 |
| 26.95249367 | 26.89272881 | 14 | 14 | 29.1 |
| 28.22448921 | 28.47965813 | 20 | 20 | 54.9 |
| 26.30274391 | 26.16794586 | 6  | 6  | 29.5 |
| 28.26785278 | 28.26140976 | 22 | 22 | 48.3 |
| 23.92587662 | 24.11902046 | 2  | 2  | 17.8 |
| 30.16122818 | 30.11483192 | 35 | 29 | 72.1 |
| 22.33603668 | 23.29852104 | 1  | 1  | 4.4  |
| 21.50069618 | 22.69313049 | 1  | 1  | 2.3  |
| 24.22978783 | 23.5400238  | 5  | 5  | 4.1  |
| 21.77342033 | 22.02725601 | 1  | 1  | 1.5  |
| 25.03712082 | 24.57421303 | 3  | 3  | 10.9 |
| 22.30694199 | 22.30960846 | 1  | 1  | 1.5  |
| 26.06256104 | 26.15317535 | 7  | 7  | 31.8 |
| 24.96903801 | 19.98665047 | 10 | 10 | 23.6 |
| 22.13360977 | 21.92401123 | 2  | 2  | 6.8  |
| 22.33892059 | 22.38173676 | 2  | 2  | 6.9  |
| 22.71661758 | 23.04143143 | 1  | 1  | 8    |
| 23.50724411 | 23.30521584 | 4  | 4  | 16.1 |
| 26.64388847 | 26.34607697 | 7  | 7  | 39.3 |
| 26.69683838 | 27.06773949 | 12 | 12 | 27.6 |
| 24.75363541 | 20.60855865 | 55 | 2  | 67.4 |
| 25.48428345 | 25.77791214 | 5  | 5  | 26   |
| 24.49142838 | 24.81401634 | 6  | 6  | 28.5 |
| 31.21251297 | 31.41795158 | 13 | 13 | 74.4 |



|             |             |    |    |      |
|-------------|-------------|----|----|------|
| 27.65717316 | 28.03936195 | 9  | 9  | 43.5 |
| 24.66979599 | 24.47766113 | 7  | 7  | 19.7 |
| 23.84565544 | 23.3001976  | 2  | 2  | 1.1  |
| 21.66609383 | 21.64557266 | 2  | 2  | 5.1  |
| 23.14883041 | 23.98988533 | 4  | 4  | 11.9 |
| 23.87539673 | 24.26119423 | 15 | 3  | 42.7 |
| 28.51487732 | 28.68515205 | 21 | 8  | 73.1 |
| 21.85555458 | 22.80978394 | 14 | 1  | 39.6 |
| 28.32165146 | 28.16110802 | 17 | 17 | 20.1 |
| 23.92922211 | 23.99239349 | 2  | 2  | 2.4  |
| 23.56465149 | 20.3408165  | 3  | 3  | 7.3  |
| 27.15421867 | 26.40301704 | 5  | 5  | 36.7 |
| 25.43099976 | 25.70659256 | 8  | 8  | 28.3 |
| 25.91558838 | 26.24514008 | 7  | 7  | 32.7 |
| 28.59846687 | 28.55830002 | 22 | 16 | 45.5 |
| 24.94975853 | 24.66795731 | 4  | 4  | 11.9 |
| 26.15867424 | 26.10263443 | 8  | 8  | 50.8 |
| 22.33519173 | 21.07617378 | 3  | 3  | 7.8  |
| 22.18286324 | 23.78396606 | 4  | 3  | 16.4 |
| 21.9553566  | 22.30780411 | 1  | 1  | 4.3  |
| 20.57699394 | 20.38395309 | 1  | 1  | 2.8  |
| 24.197155   | 24.7200985  | 4  | 4  | 22.2 |
| 23.52444458 | 23.41635132 | 3  | 3  | 16.9 |
| 29.46433449 | 29.41910744 | 16 | 15 | 62.3 |
| 28.20134926 | 28.53575134 | 11 | 11 | 78.3 |
| 26.20674324 | 26.32452202 | 5  | 5  | 38.1 |
| 26.81213188 | 26.89307594 | 8  | 7  | 38.7 |
| 28.4228611  | 28.48753738 | 13 | 13 | 74.7 |
| 28.55994034 | 28.68782425 | 14 | 14 | 62.9 |
| 31.78359032 | 31.75958633 | 19 | 19 | 48.1 |
| 23.3240242  | 23.64921761 | 5  | 5  | 9.4  |
| 23.97342491 | 24.14685822 | 6  | 5  | 17.7 |
| 24.38857269 | 24.07977104 | 2  | 2  | 7.6  |
| 24.63228607 | 24.74139404 | 1  | 1  | 5.8  |
| 25.51842308 | 25.52465248 | 5  | 5  | 22   |
| 23.8267746  | 23.86599159 | 7  | 4  | 20.4 |
| 22.99519157 | 24.20262146 | 8  | 5  | 27.9 |
| 21.89895821 | 22.22599792 | 2  | 2  | 5.7  |
| 23.55520058 | 23.214571   | 5  | 5  | 8.5  |
| 28.77778053 | 28.82168007 | 11 | 11 | 43.1 |
| 24.09924698 | 23.89901352 | 3  | 3  | 5.8  |

|             |             |    |    |      |
|-------------|-------------|----|----|------|
| 25.53427505 | 25.30389404 | 12 | 12 | 20   |
| 21.10155678 | 22.61031723 | 1  | 1  | 6.1  |
| 21.64996338 | 19.61248779 | 1  | 1  | 1.7  |
| 23.52276993 | 23.31395912 | 1  | 1  | 7    |
| 24.93853951 | 24.80493927 | 4  | 4  | 28.1 |
| 23.72587967 | 24.4942379  | 3  | 3  | 13.1 |
| 24.15522194 | 25.74509239 | 17 | 12 | 33.4 |
| 24.57876778 | 24.51436615 | 4  | 4  | 14.5 |
| 23.91360474 | 23.39191818 | 5  | 5  | 19.9 |
| 26.41705894 | 26.73763466 | 12 | 12 | 27.8 |
| 26.90987778 | 26.86903    | 10 | 10 | 47.1 |
| 26.28737831 | 26.49824715 | 8  | 8  | 43.6 |
| 24.66736221 | 26.12210464 | 3  | 3  | 12.9 |
| 26.07979012 | 26.43171692 | 6  | 6  | 41.1 |
| 25.93692398 | 26.22315407 | 6  | 6  | 30.1 |
| 26.10137367 | 26.30286598 | 6  | 6  | 35.5 |
| 27.0083847  | 27.39272118 | 6  | 6  | 36.7 |
| 26.1230526  | 26.45026016 | 7  | 7  | 53.7 |
| 24.78011703 | 24.74129105 | 5  | 5  | 35.6 |
| 24.17576981 | 23.9331913  | 4  | 4  | 27.3 |
| 23.25079536 | 23.43923569 | 5  | 5  | 22.7 |
| 24.31534195 | 24.07136536 | 3  | 3  | 25.6 |
| 23.70070648 | 24.11179543 | 3  | 3  | 21.3 |
| 25.02926445 | 25.55619621 | 7  | 7  | 21.2 |
| 26.18446159 | 26.45887375 | 9  | 9  | 26.7 |
| 25.37573814 | 25.33905792 | 8  | 8  | 33   |
| 25.63901138 | 25.99317169 | 12 | 12 | 41.9 |
| 26.14724731 | 25.9613533  | 12 | 12 | 23.3 |
| 26.28430939 | 26.47610092 | 15 | 15 | 39.8 |
| 24.57623291 | 25.13860321 | 5  | 5  | 14   |
| 24.60608482 | 24.73840904 | 7  | 7  | 29.8 |
| 25.65891647 | 25.55637169 | 4  | 4  | 24.8 |
| 24.24822044 | 23.96525574 | 4  | 4  | 11.1 |
| 23.88269043 | 24.37722969 | 4  | 4  | 12   |
| 25.37261963 | 25.69879913 | 8  | 8  | 23.2 |
| 23.16853523 | 23.87192345 | 2  | 2  | 6.2  |
| 25.84950066 | 26.03632545 | 9  | 9  | 41.1 |
| 23.29473877 | 24.01486778 | 4  | 4  | 13.9 |
| 24.20746994 | 24.09820366 | 3  | 3  | 17.1 |
| 27.30643463 | 27.61855888 | 10 | 10 | 45.8 |
| 21.08238792 | 20.16133499 | 1  | 1  | 3.5  |

|             |             |    |    |      |
|-------------|-------------|----|----|------|
| 28.11187553 | 28.2513752  | 13 | 13 | 52.4 |
| 22.05447388 | 22.02965164 | 2  | 2  | 9.4  |
| 22.55873108 | 23.2449894  | 1  | 1  | 2.3  |
| 22.74673462 | 22.46866608 | 1  | 1  | 9.6  |
| 20.94384384 | 23.2831974  | 7  | 7  | 25   |
| 26.18584061 | 26.37668228 | 4  | 4  | 30.6 |
| 22.11308479 | 22.07793045 | 2  | 2  | 2.6  |
| 30.19260597 | 30.00155449 | 25 | 25 | 59.1 |
| 22.83778572 | 23.25465012 | 2  | 2  | 7    |
| 21.87513161 | 23.10844994 | 5  | 5  | 22.5 |
| 25.58164406 | 25.7665081  | 3  | 3  | 7.6  |
| 23.98537445 | 23.64063835 | 1  | 1  | 10.9 |
| 23.32429886 | 23.02901077 | 3  | 3  | 26.3 |
| 24.2151947  | 24.2517643  | 9  | 9  | 23.1 |
| 20.07715988 | 21.77739906 | 2  | 2  | 2    |
| 21.82151985 | 22.02685165 | 2  | 2  | 1.8  |
| 23.70070648 | 23.56010818 | 2  | 2  | 19.9 |
| 22.11171722 | 23.74734879 | 1  | 1  | 6.2  |
| 25.11830711 | 25.24898148 | 3  | 3  | 12.1 |
| 23.39884758 | 22.81352615 | 5  | 5  | 5.2  |
| 25.72382545 | 25.37122536 | 6  | 6  | 18.9 |
| 28.18518066 | 28.27479935 | 34 | 24 | 45.7 |
| 24.16890335 | 24.61896515 | 15 | 9  | 24.6 |
| 28.29692841 | 28.258358   | 40 | 30 | 53.7 |
| 26.1627121  | 26.3923111  | 14 | 14 | 25.9 |
| 26.00857735 | 26.10769272 | 7  | 7  | 39.8 |
| 24.45732498 | 24.4256649  | 3  | 3  | 50.4 |
| 22.03099823 | 21.15442467 | 2  | 2  | 10.7 |
| 25.60684776 | 25.90772629 | 4  | 3  | 19.5 |
| 25.77484894 | 26.27015305 | 7  | 7  | 37.6 |
| 19.63513374 | 21.47461891 | 1  | 1  | 3.7  |
| 26.25918388 | 26.55713081 | 7  | 7  | 47.9 |
| 23.49203873 | 23.37278557 | 4  | 4  | 22.8 |
| 26.44859314 | 26.75468063 | 7  | 6  | 38   |
| 24.42419052 | 24.59371758 | 5  | 4  | 26.9 |
| 25.46460152 | 25.59240532 | 5  | 5  | 22.1 |
| 21.67702103 | 20.49277306 | 1  | 1  | 5    |
| 24.09273148 | 25.06118202 | 6  | 6  | 37.3 |
| 23.19099236 | 22.94438744 | 2  | 2  | 6.2  |
| 24.87750435 | 24.16882706 | 1  | 1  | 9    |
| 23.87445831 | 24.02411461 | 5  | 3  | 31.6 |

|             |             |    |    |      |
|-------------|-------------|----|----|------|
| 26.4276638  | 26.52702713 | 5  | 3  | 31.6 |
| 24.89998245 | 25.23363113 | 5  | 3  | 31.5 |
| 24.35568428 | 24.66427231 | 4  | 4  | 20.2 |
| 26.002388   | 26.48957634 | 9  | 9  | 56.5 |
| 23.54969025 | 23.92352104 | 2  | 1  | 12.1 |
| 22.25902557 | 22.12041283 | 2  | 1  | 12.1 |
| 28.51307106 | 28.39729881 | 10 | 4  | 56.2 |
| 24.78046608 | 25.00208664 | 4  | 4  | 17.5 |
| 24.68319321 | 24.94257164 | 2  | 2  | 10.7 |
| 22.66940689 | 22.79823875 | 1  | 1  | 4.1  |
| 25.33487129 | 25.68340683 | 2  | 2  | 21.7 |
| 23.3731842  | 23.70514297 | 3  | 3  | 1.6  |
| 21.02992058 | 21.42695618 | 1  | 1  | 1.7  |
| 25.14553833 | 25.49231339 | 8  | 2  | 58.2 |
| 28.36381912 | 28.44817543 | 10 | 4  | 72.8 |
| 20.54578972 | 20.30752182 | 1  | 1  | 6.6  |
| 24.48043633 | 23.80360985 | 2  | 2  | 17.9 |
| 26.46922112 | 26.60780716 | 13 | 13 | 24.1 |
| 21.80309677 | 21.64183044 | 1  | 1  | 2.1  |
| 24.70835686 | 24.80198288 | 6  | 2  | 15.8 |
| 20.81956673 | 19.78744316 | 6  | 2  | 15.8 |
| 27.32928658 | 27.34773254 | 9  | 9  | 67.7 |
| 20.95296669 | 20.47038078 | 2  | 2  | 3.9  |
| 23.67497635 | 23.76597595 | 1  | 1  | 1.5  |
| 23.72234154 | 24.08245277 | 2  | 2  | 4.8  |
| 25.86542511 | 25.89103699 | 2  | 2  | 32.7 |
| 23.03103256 | 23.86192703 | 6  | 6  | 14.7 |
| 23.02489281 | 23.27965927 | 3  | 3  | 7.7  |
| 28.17045021 | 28.0254879  | 11 | 11 | 80   |
| 23.46213913 | 23.18915176 | 2  | 2  | 10   |
| 26.23493004 | 26.51681709 | 6  | 4  | 33.5 |
| 20.71503639 | 22.25905418 | 3  | 1  | 11.7 |
| 21.87026787 | 22.61970329 | 1  | 1  | 1.9  |
| 22.65289688 | 22.2980442  | 1  | 1  | 7.5  |
| 25.23344803 | 25.38347244 | 4  | 4  | 22   |
| 22.63289642 | 23.71596718 | 4  | 4  | 15.8 |
| 21.69042587 | 22.53300285 | 3  | 3  | 9.6  |
| 23.10733223 | 23.52396584 | 17 | 6  | 25.7 |
| 24.47994423 | 24.39460182 | 2  | 2  | 16.2 |
| 22.49811554 | 22.08731842 | 1  | 1  | 7.6  |
| 23.03207588 | 25.09164238 | 2  | 2  | 6.8  |

|             |             |    |    |      |
|-------------|-------------|----|----|------|
| 28.36707115 | 28.73123932 | 10 | 2  | 65.8 |
| 23.43923569 | 23.09886169 | 4  | 2  | 20.9 |
| 24.53267097 | 24.85109901 | 10 | 2  | 55.4 |
| 20.38637543 | 21.18254089 | 2  | 1  | 12.2 |
| 23.30938721 | 23.12278366 | 2  | 2  | 8.4  |
| 22.62711716 | 22.19755363 | 3  | 3  | 5.9  |
| 23.34299469 | 23.93418121 | 2  | 2  | 8.3  |
| 27.61217499 | 27.60639572 | 19 | 19 | 71.9 |
| 25.29754066 | 25.28947258 | 8  | 8  | 20.6 |
| 26.33256721 | 26.29771614 | 16 | 12 | 15.2 |
| 24.15166664 | 24.01154327 | 9  | 5  | 8.4  |
| 22.47454453 | 22.68414497 | 1  | 1  | 8.3  |
| 26.59448624 | 27.01892471 | 7  | 7  | 42.5 |
| 26.31972313 | 26.7929039  | 8  | 8  | 33.2 |
| 24.54102898 | 24.24532318 | 2  | 2  | 12.9 |
| 26.48604965 | 26.74611855 | 4  | 4  | 35.8 |
| 27.09667587 | 27.19488525 | 6  | 6  | 28.4 |
| 25.47280502 | 25.31793213 | 3  | 3  | 8.4  |
| 26.20127487 | 26.69032478 | 5  | 5  | 25.8 |
| 26.06630325 | 26.5035038  | 7  | 7  | 34.3 |
| 26.70872498 | 27.30747604 | 5  | 5  | 28.3 |
| 25.6776123  | 24.81367302 | 5  | 5  | 26.1 |
| 23.26627922 | 24.54315376 | 5  | 5  | 15.3 |
| 23.33579063 | 24.21014786 | 4  | 4  | 21.4 |
| 25.41831589 | 25.41141319 | 5  | 5  | 33.1 |
| 24.9077034  | 25.35380173 | 3  | 3  | 39.1 |
| 26.23048401 | 26.71920967 | 3  | 3  | 27.1 |
| 25.22776985 | 25.51911354 | 5  | 5  | 27.6 |
| 26.5892086  | 26.84732819 | 5  | 5  | 29.9 |
| 25.21337891 | 25.42851067 | 3  | 3  | 18.6 |
| 24.59000778 | 24.86759377 | 3  | 3  | 20.6 |
| 26.20459938 | 26.49941826 | 4  | 4  | 27.7 |
| 21.89062309 | 25.13801575 | 2  | 2  | 12.4 |
| 26.84218216 | 27.08294106 | 8  | 8  | 23.1 |
| 24.19618034 | 24.40295029 | 2  | 2  | 24.3 |
| 26.24267197 | 26.39997292 | 1  | 1  | 11.2 |
| 25.60969734 | 25.93710327 | 6  | 6  | 39.3 |
| 24.64190674 | 25.17066193 | 3  | 3  | 20.5 |
| 24.25745773 | 24.08602142 | 1  | 1  | 8.1  |
| 24.25392914 | 24.50385284 | 2  | 2  | 7.3  |
| 24.71019745 | 25.3558197  | 2  | 2  | 11.4 |

|             |             |    |    |      |
|-------------|-------------|----|----|------|
| 23.82667732 | 23.83634186 | 3  | 3  | 41.3 |
| 23.45073318 | 23.93975067 | 3  | 3  | 51.4 |
| 24.83759308 | 24.73892403 | 1  | 1  | 19.6 |
| 28.57304192 | 28.80378151 | 19 | 19 | 42.7 |
| 26.44113731 | 26.65553665 | 8  | 8  | 32.3 |
| 26.4120121  | 27.05589676 | 8  | 8  | 30.4 |
| 26.82614326 | 26.74842453 | 13 | 13 | 40.4 |
| 27.07958794 | 27.10229492 | 14 | 14 | 46.2 |
| 26.20717239 | 26.49318504 | 6  | 6  | 35.4 |
| 24.75485992 | 25.29561615 | 4  | 4  | 36.5 |
| 27.2703495  | 27.3646946  | 12 | 12 | 53.9 |
| 27.99609566 | 28.02501297 | 4  | 4  | 79.8 |
| 27.34933662 | 27.39966393 | 5  | 5  | 76.5 |
| 27.45332527 | 27.85572815 | 19 | 19 | 42.3 |
| 27.61006355 | 27.76236916 | 11 | 11 | 28.7 |
| 25.94986916 | 26.01726913 | 6  | 6  | 42.4 |
| 24.88976097 | 25.49713516 | 5  | 5  | 24.1 |
| 25.85321999 | 25.7470665  | 7  | 7  | 59.1 |
| 27.48999023 | 27.85132599 | 10 | 10 | 45   |
| 24.80282021 | 25.04901505 | 5  | 5  | 63.6 |
| 26.27744484 | 26.47130203 | 4  | 4  | 55.9 |
| 26.10004997 | 26.41523933 | 7  | 7  | 49.2 |
| 23.46637726 | 22.66218758 | 2  | 2  | 15.8 |
| 26.26679802 | 26.3687458  | 4  | 4  | 40   |
| 26.74329567 | 27.22894287 | 5  | 5  | 27.6 |
| 26.92660141 | 26.99129105 | 7  | 7  | 37.2 |
| 26.31387329 | 26.38677979 | 8  | 8  | 33.4 |
| 25.1622715  | 25.49463463 | 3  | 3  | 25.2 |
| 20.0128746  | 23.37358284 | 2  | 2  | 28.9 |
| 24.26506424 | 24.77137756 | 4  | 4  | 21.7 |
| 24.45293427 | 24.92284012 | 4  | 4  | 30   |
| 25.44859314 | 25.35773277 | 4  | 4  | 18.4 |
| 24.79461479 | 25.09748077 | 4  | 4  | 37.4 |
| 28.14549828 | 28.32684517 | 5  | 5  | 42.3 |
| 26.74650383 | 27.30591202 | 2  | 2  | 25   |
| 23.03284836 | 23.44404793 | 1  | 1  | 17.4 |
| 24.31741333 | 24.02884293 | 1  | 1  | 19.6 |
| 26.13094711 | 26.42318153 | 10 | 10 | 50.6 |
| 27.54200363 | 27.83827972 | 8  | 8  | 32.2 |
| 27.18763542 | 27.46302795 | 10 | 10 | 38.4 |
| 26.17481804 | 26.20435715 | 8  | 8  | 42.6 |

|             |             |    |    |      |
|-------------|-------------|----|----|------|
| 25.49335289 | 21.9473877  | 2  | 2  | 10.8 |
| 21.85616302 | 22.03466415 | 1  | 1  | 2.2  |
| 26.37878418 | 26.32318115 | 7  | 7  | 45.4 |
| 27.0588932  | 27.21845055 | 9  | 9  | 41.3 |
| 26.74059677 | 27.10559464 | 9  | 9  | 32.5 |
| 28.13697052 | 28.25354195 | 12 | 12 | 57.6 |
| 20.38921547 | 20.04093361 | 1  | 1  | 6.2  |
| 22.99650383 | 22.94188309 | 1  | 1  | 3.6  |
| 27.6257515  | 27.43936348 | 11 | 8  | 51.4 |
| 27.01062584 | 27.23178291 | 12 | 12 | 11.4 |
| 29.95823097 | 29.8488369  | 14 | 14 | 62.8 |
| 20.80318832 | 20.77438927 | 2  | 2  | 6.6  |
| 25.21663857 | 25.45647812 | 6  | 6  | 16.8 |
| 22.64070511 | 23.02575302 | 2  | 2  | 2.3  |
| 22.52382278 | 22.23888016 | 2  | 2  | 13.2 |
| 25.33510971 | 25.97842979 | 2  | 2  | 11   |
| 22.90886688 | 22.23371124 | 7  | 1  | 12   |
| 26.7781868  | 26.6408596  | 7  | 1  | 36.2 |
| 24.8969841  | 25.11584854 | 6  | 6  | 31.6 |
| 22.37071228 | 22.52281761 | 1  | 1  | 2.9  |
| 24.16982079 | 24.55929184 | 4  | 4  | 12.1 |
| 20.67079163 | 19.92878532 | 1  | 1  | 0.4  |
| 22.29557991 | 24.42981911 | 1  | 1  | 16   |
| 29.15433884 | 29.00648689 | 4  | 4  | 64.3 |
| 23.55625343 | 23.18592072 | 3  | 3  | 46.9 |
| 32.12241364 | 31.70182037 | 5  | 5  | 42.6 |
| 25.64652824 | 24.16982079 | 1  | 1  | 18.3 |
| 27.56165314 | 26.86620331 | 3  | 3  | 33.7 |
| 22.24199677 | 22.14416885 | 1  | 1  | 3.7  |
| 23.98502731 | 24.16430664 | 7  | 7  | 11.6 |
| 24.93039513 | 25.07050514 | 5  | 5  | 22.3 |
| 24.40717316 | 24.24793243 | 2  | 2  | 2.1  |
| 24.82318306 | 25.20959091 | 6  | 6  | 15.6 |
| 25.06968689 | 24.87084198 | 6  | 5  | 35.9 |
| 21.6243515  | 22.44288445 | 4  | 3  | 21.2 |
| 25.27252197 | 25.461483   | 10 | 10 | 28.5 |
| 23.03743172 | 23.25085449 | 1  | 1  | 6.8  |
| 23.70429802 | 23.83730507 | 2  | 2  | 13.9 |
| 23.11530876 | 23.66557312 | 3  | 3  | 10.9 |
| 23.17831039 | 23.2591114  | 2  | 2  | 13.3 |
| 24.82006836 | 24.84507942 | 7  | 7  | 22.1 |

|             |             |    |    |      |
|-------------|-------------|----|----|------|
| 22.66225243 | 22.63986588 | 1  | 1  | 22.2 |
| 24.62444115 | 25.16380692 | 5  | 5  | 40.6 |
| 22.81882095 | 22.84507942 | 2  | 2  | 5.8  |
| 23.82842255 | 23.81039238 | 2  | 2  | 7    |
| 23.20125961 | 22.78474617 | 2  | 2  | 12.7 |
| 25.772686   | 25.43866539 | 6  | 6  | 11.3 |
| 27.82323074 | 27.681036   | 17 | 17 | 44.9 |
| 26.09587288 | 26.31624031 | 8  | 8  | 31.6 |
| 24.76152039 | 25.07834625 | 3  | 3  | 17.2 |
| 23.10720444 | 23.69498062 | 2  | 2  | 20.8 |
| 23.15027237 | 23.43695068 | 2  | 2  | 6.7  |
| 24.19663048 | 24.5116539  | 3  | 3  | 18.6 |
| 25.45613289 | 25.59109306 | 3  | 3  | 18.6 |
| 26.41960144 | 26.3066082  | 17 | 15 | 30.1 |
| 22.05377769 | 22.562603   | 3  | 1  | 4.8  |
| 23.72671127 | 23.47370338 | 3  | 3  | 6.1  |
| 26.97989273 | 27.23753929 | 21 | 21 | 27.2 |
| 25.32416153 | 25.25832176 | 1  | 1  | 0.7  |
| 24.3528595  | 25.06147003 | 4  | 4  | 18.1 |
| 28.13525963 | 28.29710388 | 23 | 23 | 59.3 |
| 22.65981483 | 22.37824821 | 2  | 2  | 20   |
| 23.67087746 | 23.25493813 | 1  | 1  | 4.2  |
| 19.49630737 | 21.27861023 | 1  | 1  | 10.8 |
| 22.34651566 | 23.05458832 | 2  | 2  | 9.2  |
| 22.43928719 | 22.03459549 | 1  | 1  | 5.8  |
| 22.39725494 | 22.70074844 | 5  | 2  | 14.4 |
| 25.40918159 | 25.17451477 | 6  | 6  | 29.8 |
| 27.66972923 | 27.61491394 | 6  | 5  | 19   |
| 25.14786911 | 25.72956657 | 6  | 4  | 25.6 |
| 23.83826637 | 24.03866959 | 3  | 3  | 20   |
| 25.3960743  | 25.28676033 | 15 | 1  | 43.1 |
| 28.09108734 | 27.79890823 | 14 | 5  | 48.4 |
| 30.85786438 | 30.88241577 | 15 | 1  | 43.2 |
| 27.42213821 | 27.6028614  | 15 | 5  | 44.8 |
| 27.753088   | 27.07694054 | 12 | 6  | 32.7 |
| 28.66993141 | 28.81796646 | 13 | 8  | 34.2 |
| 23.4661274  | 23.41583633 | 7  | 5  | 17   |
| 20.86256218 | 21.41946602 | 1  | 1  | 3    |
| 22.60460472 | 22.27560234 | 4  | 4  | 11.9 |
| 28.27905655 | 28.46497536 | 16 | 16 | 55.3 |
| 29.58348083 | 29.22250938 | 18 | 13 | 42.6 |



|             |             |    |    |      |
|-------------|-------------|----|----|------|
| 25.34898186 | 25.16863441 | 8  | 8  | 21.8 |
| 28.06768799 | 27.62205505 | 16 | 16 | 49.1 |
| 26.88692856 | 26.68445015 | 6  | 6  | 24.2 |
| 22.27372551 | 22.34975815 | 1  | 1  | 1.6  |
| 24.83494377 | 24.76885605 | 6  | 6  | 23.2 |
| 23.93192863 | 23.95153809 | 3  | 3  | 19.5 |
| 21.74476433 | 20.63479805 | 1  | 1  | 4.9  |
| 24.40522575 | 24.45004082 | 4  | 4  | 13.5 |
| 22.7534008  | 23.04863167 | 3  | 3  | 4.6  |
| 22.26627922 | 22.65652466 | 1  | 1  | 3.6  |
| 24.36372566 | 24.19204521 | 6  | 6  | 7.2  |
| 23.51159286 | 24.12919807 | 4  | 4  | 5.5  |
| 22.95233727 | 23.01139069 | 1  | 1  | 5.4  |
| 25.05916023 | 25.54913139 | 3  | 1  | 10.5 |
| 26.08253479 | 26.32978249 | 11 | 11 | 25.6 |
| 25.13621712 | 24.67750549 | 7  | 7  | 34.1 |
| 24.97171593 | 24.8514328  | 7  | 6  | 38.2 |
| 28.54513741 | 28.26968002 | 13 | 12 | 60.7 |
| 24.63533401 | 24.48867226 | 5  | 5  | 17.1 |
| 24.9865036  | 24.88488007 | 6  | 6  | 26.2 |
| 26.15537643 | 26.29245949 | 5  | 5  | 18   |
| 26.69696999 | 26.69484711 | 6  | 6  | 21.3 |
| 23.17532921 | 23.23409271 | 1  | 1  | 6.5  |
| 22.43461227 | 22.58806419 | 1  | 1  | 3    |
| 26.93337059 | 25.72684288 | 2  | 2  | 7.6  |
| 27.71685791 | 27.93151283 | 6  | 6  | 71.1 |
| 25.18635178 | 24.97342491 | 3  | 3  | 57   |
| 29.41365051 | 29.17819023 | 1  | 1  | 1.6  |
| 20.43129539 | 22.54382706 | 3  | 3  | 9.2  |
| 24.27013588 | 24.11616707 | 3  | 3  | 11.5 |
| 23.70767212 | 24.06546021 | 3  | 3  | 11.3 |
| 23.44997787 | 23.0146122  | 2  | 2  | 2.2  |
| 23.8303566  | 23.60059547 | 5  | 5  | 18.6 |
| 24.03590584 | 23.54167747 | 1  | 1  | 1.1  |
| 21.48517418 | 21.50610542 | 2  | 2  | 12.3 |
| 25.06044006 | 25.14627647 | 3  | 3  | 25.8 |
| 21.94428062 | 22.1788578  | 2  | 2  | 1.6  |
| 22.46689987 | 23.39610672 | 2  | 2  | 6    |
| 25.69069862 | 26.42048454 | 7  | 7  | 33.1 |
| 23.20060158 | 24.53878021 | 2  | 2  | 11.1 |
| 25.67174149 | 25.8233757  | 8  | 8  | 34.4 |

|             |             |    |    |      |
|-------------|-------------|----|----|------|
| 26.71607208 | 26.83773804 | 12 | 10 | 26.6 |
| 24.81435776 | 24.97871399 | 8  | 8  | 43.5 |
| 24.91984367 | 24.99360466 | 6  | 6  | 21.3 |
| 27.24608421 | 27.70457649 | 11 | 11 | 34.5 |
| 30.24977303 | 30.27430916 | 20 | 10 | 58.4 |
| 22.57466316 | 22.11066628 | 2  | 2  | 12.3 |
| 27.74457932 | 27.8331604  | 20 | 10 | 55.4 |
| 22.91316605 | 22.92226982 | 1  | 1  | 6.4  |
| 21.86461258 | 22.05132294 | 2  | 2  | 2.9  |
| 20.99872589 | 20.91086197 | 1  | 1  | 2.8  |
| 20.54026794 | 21.32439423 | 2  | 2  | 3.7  |
| 23.37875175 | 22.76133728 | 3  | 3  | 9.3  |
| 25.04272461 | 25.137743   | 6  | 6  | 11.8 |
| 28.29425812 | 28.39304733 | 22 | 22 | 32.9 |
| 21.80570793 | 22.06989098 | 3  | 3  | 3.5  |
| 23.95712852 | 23.61829376 | 2  | 2  | 2.6  |
| 27.97612572 | 27.74323273 | 12 | 12 | 38.7 |
| 20.72878456 | 23.56115913 | 2  | 2  | 2.3  |
| 23.2425766  | 24.0539093  | 4  | 4  | 3.9  |
| 23.34813881 | 23.17975426 | 5  | 5  | 7    |
| 23.14153671 | 23.23347855 | 4  | 4  | 3.5  |
| 20.53944016 | 21.33369064 | 1  | 1  | 1    |
| 21.8688755  | 21.7117939  | 1  | 1  | 15.9 |
| 26.55120087 | 26.08780289 | 7  | 7  | 21   |
| 21.87571526 | 22.01930237 | 1  | 1  | 2    |
| 20.88330269 | 22.3990097  | 1  | 1  | 4.9  |
| 21.3876915  | 21.31871033 | 1  | 1  | 2.2  |
| 23.27113342 | 23.6135807  | 3  | 3  | 8.1  |
| 25.26795959 | 24.96543121 | 3  | 3  | 43.1 |
| 26.61526489 | 26.56841087 | 14 | 14 | 23.6 |
| 25.02550888 | 24.839468   | 10 | 10 | 6.6  |
| 24.86881828 | 24.76222992 | 3  | 3  | 21.7 |
| 23.37371635 | 24.23205757 | 4  | 3  | 21.6 |
| 23.49338341 | 23.93624878 | 3  | 2  | 17.8 |
| 25.6798687  | 25.96210289 | 1  | 1  | 16.8 |
| 23.66144753 | 24.18343925 | 2  | 2  | 15.1 |
| 24.86083794 | 25.26695824 | 1  | 1  | 12   |
| 23.66763306 | 23.99524498 | 1  | 1  | 24.4 |
| 23.66990471 | 23.49411583 | 1  | 1  | 9.2  |
| 25.32717896 | 25.20739555 | 6  | 5  | 18.9 |
| 26.78768349 | 26.54079247 | 12 | 11 | 33.3 |

|             |             |    |    |      |
|-------------|-------------|----|----|------|
| 26.49429893 | 26.65921593 | 11 | 10 | 24.6 |
| 23.28883934 | 23.72858238 | 4  | 3  | 22.4 |
| 21.29642677 | 22.78913116 | 1  | 1  | 4.9  |
| 26.21226501 | 26.08259583 | 6  | 6  | 15   |
| 20.25148964 | 23.32745361 | 3  | 2  | 9.4  |
| 24.11727715 | 24.31830978 | 4  | 3  | 21   |
| 21.54769135 | 21.10584641 | 2  | 2  | 5.3  |
| 23.63555527 | 23.5148468  | 6  | 6  | 16.6 |
| 22.29224205 | 22.80151939 | 2  | 2  | 4.7  |
| 24.51243782 | 24.5159893  | 8  | 8  | 21   |
| 28.77083588 | 29.19605827 | 4  | 4  | 31.8 |
| 27.28911972 | 27.30286598 | 9  | 9  | 67.6 |
| 30.54535866 | 30.24501801 | 10 | 10 | 57.4 |
| 27.43912506 | 27.30112267 | 13 | 13 | 22   |
| 27.23159981 | 27.26114082 | 20 | 20 | 46.6 |
| 25.75000954 | 25.35947609 | 6  | 6  | 10.8 |
| 24.12597084 | 23.87314415 | 2  | 2  | 7.3  |
| 27.46660995 | 27.10539627 | 5  | 5  | 26.5 |
| 21.67882729 | 21.17058754 | 3  | 3  | 2.3  |
| 23.57392311 | 23.10872078 | 2  | 2  | 3.7  |
| 23.36452866 | 23.62410736 | 1  | 1  | 8.4  |
| 24.50815201 | 24.66822815 | 5  | 5  | 8.6  |
| 26.89226532 | 27.03967476 | 6  | 6  | 32.6 |
| 26.81860542 | 26.62519455 | 37 | 37 | 23   |
| 29.90066719 | 30.12829399 | 88 | 88 | 44.9 |
| 26.47552872 | 26.20693016 | 39 | 36 | 24   |
| 29.86701393 | 30.10512161 | 77 | 74 | 46.6 |
| 26.63367271 | 26.87584114 | 7  | 7  | 44.3 |
| 24.22582245 | 24.61245537 | 4  | 4  | 22.8 |
| 20.66539955 | 22.70167923 | 1  | 1  | 12.7 |
| 22.73657227 | 23.00466919 | 4  | 4  | 12.1 |
| 24.51285934 | 24.2448864  | 6  | 6  | 20.8 |
| 23.10375214 | 23.62566948 | 1  | 1  | 1.3  |
| 24.3649292  | 24.99791527 | 3  | 3  | 2.7  |
| 23.98468018 | 24.05763245 | 3  | 3  | 25.5 |
| 23.66979599 | 23.24530792 | 2  | 2  | 15.3 |
| 24.35534859 | 24.74232101 | 2  | 2  | 10.9 |
| 24.35729599 | 24.85505104 | 2  | 2  | 4.7  |
| 23.8358593  | 24.02191353 | 3  | 3  | 26.1 |
| 25.76306534 | 25.86940765 | 7  | 7  | 24.6 |
| 23.17723083 | 23.58760643 | 1  | 1  | 9.9  |

|             |             |    |    |      |
|-------------|-------------|----|----|------|
| 19.11759186 | 22.06104851 | 1  | 1  | 4.2  |
| 24.46637726 | 24.37947845 | 2  | 2  | 8    |
| 22.84333611 | 23.29754066 | 2  | 2  | 14   |
| 25.93341637 | 26.23007965 | 4  | 4  | 12.7 |
| 22.94122124 | 22.68568611 | 2  | 2  | 4.7  |
| 25.12951279 | 24.99714088 | 6  | 6  | 16.6 |
| 23.58267784 | 24.27334023 | 4  | 4  | 11.3 |
| 23.26226997 | 23.27284241 | 2  | 2  | 3.4  |
| 27.19769859 | 27.4510479  | 18 | 18 | 33.7 |
| 25.338377   | 25.29487991 | 5  | 5  | 16.9 |
| 20.66583443 | 22.40392685 | 1  | 1  | 4.5  |
| 26.41094398 | 26.37197304 | 7  | 7  | 38.7 |
| 24.36325836 | 24.47314453 | 4  | 4  | 25.8 |
| 20.17998123 | 19.76218033 | 3  | 3  | 4.9  |
| 19.81949806 | 22.28954315 | 1  | 1  | 2.3  |
| 23.16832161 | 23.09746361 | 3  | 3  | 8    |
| 21.99962044 | 22.4128933  | 1  | 1  | 1    |
| 22.40244293 | 22.18897057 | 3  | 3  | 3.3  |
| 24.05531693 | 24.30452156 | 4  | 4  | 20.8 |
| 22.74139404 | 23.08354187 | 1  | 1  | 5.5  |
| 22.85092735 | 23.04708481 | 1  | 1  | 5.4  |
| 25.55467415 | 25.47305298 | 7  | 7  | 17.5 |
| 26.76673508 | 26.44621086 | 16 | 16 | 41.9 |
| 27.96438599 | 27.70318985 | 11 | 11 | 34.7 |
| 25.57478905 | 25.58402634 | 7  | 7  | 21.6 |
| 23.10181427 | 20.21336746 | 4  | 4  | 17   |
| 19.7831707  | 22.64147758 | 1  | 1  | 1.6  |
| 24.01580238 | 23.90085793 | 5  | 5  | 9.8  |
| 26.74201202 | 26.70014954 | 11 | 11 | 23.2 |
| 22.34656906 | 22.48005486 | 1  | 1  | 5.5  |
| 23.78825569 | 23.6502037  | 3  | 3  | 16.4 |
| 26.11123848 | 26.09160042 | 10 | 10 | 20   |
| 23.83006668 | 24.40509605 | 7  | 7  | 4.3  |
| 20.63058662 | 20.72498703 | 1  | 1  | 7.1  |
| 25.57977486 | 26.03069496 | 9  | 9  | 18.7 |
| 24.54061508 | 24.16292381 | 14 | 14 | 2.8  |
| 23.01084518 | 23.39375114 | 4  | 4  | 0.8  |
| 23.07537079 | 23.01957512 | 2  | 2  | 2.2  |
| 25.72356415 | 25.6292305  | 14 | 14 | 23.1 |
| 33.33151245 | 33.31797028 | 28 | 28 | 90.5 |
| 25.7692852  | 25.80208206 | 3  | 1  | 18.1 |

|             |             |     |     |      |
|-------------|-------------|-----|-----|------|
| 26.68605614 | 26.88227081 | 10  | 10  | 26.7 |
| 24.55408859 | 25.77552795 | 4   | 4   | 15.6 |
| 25.99487686 | 26.11838531 | 10  | 10  | 38.2 |
| 24.6768589  | 24.13602257 | 7   | 7   | 12.9 |
| 21.30457687 | 22.14036751 | 2   | 2   | 1.9  |
| 21.29451561 | 21.92230606 | 1   | 1   | 1.3  |
| 22.53138542 | 23.23874855 | 2   | 2   | 7.3  |
| 23.36506271 | 23.73562241 | 3   | 3   | 28.6 |
| 25.57654953 | 25.24278069 | 2   | 2   | 28   |
| 21.4904232  | 21.25534248 | 1   | 1   | 3.3  |
| 27.2556591  | 27.51344681 | 16  | 16  | 41.7 |
| 27.03632545 | 27.03391266 | 13  | 13  | 43.5 |
| 30.71906281 | 30.74422646 | 33  | 32  | 54.4 |
| 30.71669388 | 30.55059624 | 21  | 21  | 76.1 |
| 28.95229912 | 28.95540619 | 27  | 27  | 55.5 |
| 30.03577423 | 30.14041328 | 33  | 33  | 60.3 |
| 22.21723747 | 22.88877678 | 3   | 3   | 9.4  |
| 26.25760269 | 25.59340286 | 13  | 13  | 14.3 |
| 22.63931465 | 22.04029465 | 2   | 2   | 6.3  |
| 25.82201576 | 26.57484818 | 4   | 4   | 31.5 |
| 23.50166702 | 23.68827248 | 2   | 2   | 26.3 |
| 21.93488312 | 21.86048889 | 3   | 3   | 6    |
| 21.51108742 | 21.58031082 | 1   | 1   | 2.8  |
| 23.86551857 | 23.13802338 | 4   | 4   | 26.1 |
| 30.15267181 | 29.82767296 | 19  | 19  | 65   |
| 24.13014221 | 23.56697464 | 4   | 4   | 4    |
| 29.96870422 | 30.12114525 | 36  | 36  | 69.2 |
| 33.15402985 | 33.07075119 | 125 | 115 | 67.1 |
| 24.63594246 | 24.74452972 | 16  | 6   | 8.8  |
| 22.57537842 | 22.60458183 | 2   | 2   | 12.2 |
| 25.79238319 | 25.94844437 | 5   | 5   | 22.4 |
| 24.98441887 | 24.13977432 | 3   | 3   | 20.4 |
| 22.73134041 | 23.33551788 | 3   | 2   | 14.5 |
| 20.4084568  | 24.44056702 | 2   | 2   | 24.6 |
| 20.86500931 | 21.71678352 | 1   | 1   | 15   |
| 27.53830719 | 27.61519432 | 11  | 11  | 42.2 |
| 22.0160408  | 22.07868004 | 4   | 3   | 13.6 |
| 25.59200668 | 25.4575119  | 9   | 8   | 34.4 |
| 27.46123314 | 27.44324303 | 9   | 4   | 33.9 |
| 23.44720459 | 23.39086914 | 8   | 3   | 18.3 |
| 22.61456871 | 23.55414772 | 2   | 1   | 47.7 |

|             |             |    |    |      |
|-------------|-------------|----|----|------|
| 27.12208557 | 27.0980835  | 7  | 6  | 77.3 |
| 22.32583618 | 22.70279884 | 3  | 3  | 5.2  |
| 23.57114792 | 23.99791527 | 2  | 2  | 9    |
| 20.31462288 | 21.54207993 | 2  | 2  | 9.2  |
| 22.14668846 | 22.53300285 | 1  | 1  | 3.9  |
| 18.71855164 | 21.56732368 | 13 | 13 | 12.1 |
| 21.96508026 | 22.08138084 | 1  | 1  | 11.6 |
| 25.1848011  | 25.0961132  | 9  | 5  | 15.6 |
| 22.93470383 | 22.84483147 | 5  | 1  | 9.6  |
| 24.34631348 | 24.21452713 | 6  | 6  | 10.2 |
| 27.2501564  | 27.08090973 | 19 | 17 | 19.9 |
| 22.4895916  | 22.3631916  | 4  | 4  | 10.8 |
| 24.19895363 | 23.75501251 | 4  | 4  | 13.4 |
| 22.56579018 | 23.30980301 | 2  | 2  | 22.5 |
| 23.58829308 | 23.76809883 | 3  | 3  | 15.5 |
| 24.04268265 | 24.23139954 | 4  | 4  | 8.8  |
| 26.62142754 | 26.28631973 | 2  | 2  | 1.6  |
| 24.33640289 | 24.94989204 | 7  | 7  | 6.1  |
| 22.92775917 | 24.72166252 | 3  | 3  | 10.2 |
| 21.87990761 | 22.09335899 | 1  | 1  | 2.4  |
| 23.02534866 | 22.43272781 | 2  | 2  | 8.6  |
| 21.67366028 | 21.88412666 | 2  | 2  | 7.5  |
| 21.99985695 | 22.22673416 | 3  | 3  | 21.1 |
| 25.36268997 | 25.84196472 | 4  | 4  | 29.1 |
| 29.51158142 | 29.5846653  | 19 | 19 | 71.2 |
| 29.91470528 | 29.80843925 | 23 | 2  | 53.5 |
| 28.80651855 | 29.0132122  | 14 | 6  | 40.7 |
| 26.79971123 | 26.55645943 | 9  | 9  | 39.5 |
| 25.11283112 | 25.64077568 | 4  | 4  | 15.3 |
| 20.97324181 | 20.46478462 | 1  | 1  | 7.3  |
| 27.89533234 | 27.88250351 | 11 | 11 | 52.8 |
| 23.12993622 | 22.74822998 | 2  | 2  | 1.2  |
| 20.82034111 | 21.40468025 | 1  | 1  | 6.3  |
| 26.5486908  | 27.33807182 | 5  | 5  | 48.3 |
| 22.80447578 | 22.89400673 | 2  | 2  | 3.8  |
| 19.58760834 | 20.76571274 | 1  | 1  | 8.6  |
| 22.76650238 | 23.26198387 | 2  | 2  | 15   |
| 23.27298546 | 23.6831398  | 1  | 1  | 12   |
| 21.79530907 | 21.39670753 | 1  | 1  | 1.9  |
| 25.19700623 | 25.69625473 | 8  | 8  | 16.4 |
| 24.7856636  | 24.38541603 | 7  | 7  | 15.8 |

|             |             |    |    |      |
|-------------|-------------|----|----|------|
| 21.41168022 | 21.57910919 | 1  | 1  | 1    |
| 27.53058815 | 27.34671783 | 5  | 5  | 15.2 |
| 22.63486862 | 22.33076668 | 1  | 1  | 9.6  |
| 22.5472908  | 22.9248085  | 4  | 4  | 9.9  |
| 20.87916565 | 24.35649109 | 3  | 3  | 19.7 |
| 24.04942894 | 24.59588051 | 5  | 5  | 23.4 |
| 23.86636734 | 23.13630486 | 1  | 1  | 10.5 |
| 22.82115936 | 22.6035862  | 1  | 1  | 4.6  |
| 25.36952782 | 25.11465836 | 3  | 3  | 38.5 |
| 24.09152031 | 24.48763084 | 4  | 4  | 16.2 |
| 20.82065201 | 21.19388199 | 1  | 1  | 0.6  |
| 23.91916275 | 24.33244705 | 5  | 5  | 14.2 |
| 22.93479347 | 20.01530266 | 2  | 2  | 4.1  |
| 21.72754288 | 24.25320816 | 27 | 27 | 1    |
| 26.32709503 | 25.8868351  | 26 | 1  | 76.9 |
| 31.65902138 | 31.72228432 | 26 | 0  | 76.9 |
| 27.72566032 | 27.71463203 | 26 | 1  | 77.3 |
| 23.86740494 | 25.18955994 | 21 | 3  | 57.6 |
| 27.28920937 | 27.72637367 | 25 | 5  | 66.3 |
| 25.94187927 | 26.61722755 | 21 | 5  | 57.3 |
| 24.0116291  | 23.91433334 | 25 | 3  | 69.8 |
| 32.09065247 | 32.20431519 | 28 | 1  | 73.3 |
| 28.89787292 | 28.82238007 | 26 | 5  | 69.1 |
| 26.69789886 | 26.61076736 | 10 | 10 | 30.3 |
| 23.94368935 | 23.69189644 | 3  | 1  | 7.7  |
| 22.65276527 | 23.13097382 | 4  | 2  | 14.4 |
| 27.8646698  | 28.21604538 | 6  | 6  | 55.2 |
| 22.39962959 | 23.11822701 | 1  | 1  | 12.7 |
| 26.3533802  | 26.27653885 | 7  | 7  | 26.4 |
| 24.43001175 | 24.94087029 | 3  | 3  | 13.5 |
| 25.05353737 | 25.10097313 | 5  | 5  | 17.4 |
| 23.62622643 | 23.98320198 | 3  | 3  | 18.4 |
| 24.6595974  | 25.23516655 | 2  | 2  | 7.2  |
| 24.25673866 | 24.4593277  | 6  | 6  | 16.8 |
| 29.47187042 | 29.67620087 | 30 | 30 | 47.7 |
| 23.08885574 | 23.5460434  | 2  | 2  | 4.2  |
| 21.14177132 | 22.27474976 | 1  | 1  | 3.8  |
| 24.32017136 | 18.81748009 | 3  | 3  | 14.9 |
| 20.45887756 | 22.26011848 | 2  | 2  | 1.8  |
| 25.46179581 | 25.09615326 | 4  | 4  | 42.9 |
| 23.00442886 | 23.37967682 | 2  | 2  | 13.9 |

|             |             |    |    |      |
|-------------|-------------|----|----|------|
| 22.92536926 | 22.8402462  | 3  | 3  | 24.5 |
| 26.64141083 | 26.80156326 | 4  | 4  | 41.6 |
| 27.23260689 | 27.16240501 | 5  | 5  | 48   |
| 25.04205704 | 25.11961365 | 4  | 4  | 18.6 |
| 29.73222542 | 28.85436058 | 2  | 2  | 2.5  |
| 21.83460617 | 20.99872589 | 1  | 1  | 1.4  |
| 20.88651466 | 21.7689476  | 1  | 1  | 1.5  |
| 19.82559776 | 20.6557827  | 1  | 1  | 12.3 |
| 23.5909214  | 24.13288879 | 4  | 2  | 9.7  |
| 22.15158844 | 22.41204071 | 3  | 1  | 6.3  |
| 23.2734127  | 23.79024506 | 5  | 5  | 1.6  |
| 23.69816399 | 23.70408821 | 1  | 1  | 5.4  |
| 19.45850754 | 22.96117973 | 1  | 1  | 6.9  |
| 27.43173409 | 27.23735619 | 10 | 10 | 71.7 |
| 23.17817497 | 23.60002899 | 2  | 2  | 13   |
| 27.93297768 | 27.26472473 | 18 | 18 | 80.8 |
| 24.98220062 | 25.36733055 | 3  | 3  | 28.7 |
| 24.84143829 | 24.53777313 | 3  | 3  | 11.7 |
| 24.79109001 | 25.20277023 | 2  | 2  | 58.8 |
| 26.69723511 | 26.55451393 | 18 | 18 | 21.3 |
| 25.34732819 | 25.68549347 | 9  | 9  | 21.5 |
| 20.96972466 | 20.96211624 | 2  | 2  | 5.1  |
| 20.74287605 | 20.77836227 | 1  | 1  | 4.6  |
| 26.65812683 | 26.63089752 | 22 | 22 | 32.2 |
| 24.52749062 | 24.50008774 | 7  | 7  | 7.5  |
| 25.46497536 | 25.48953056 | 2  | 2  | 37.5 |
| 24.01690865 | 24.59889221 | 1  | 1  | 21.4 |
| 26.234272   | 26.24778748 | 5  | 5  | 45   |
| 28.0877533  | 28.15281677 | 22 | 22 | 55.6 |
| 28.86263084 | 28.85676765 | 19 | 19 | 60.9 |
| 27.19863701 | 26.71999359 | 8  | 8  | 46   |
| 25.03477287 | 24.58422661 | 1  | 1  | 20.2 |
| 26.80833054 | 26.78406715 | 6  | 6  | 68.3 |
| 22.45665932 | 22.12855339 | 2  | 2  | 9.5  |
| 20.3827877  | 21.89748192 | 1  | 1  | 17.2 |
| 24.41060448 | 23.89679909 | 8  | 8  | 12.2 |
| 24.40177917 | 24.8587532  | 4  | 4  | 11.2 |
| 20.57117081 | 20.37951851 | 1  | 1  | 1.6  |
| 25.8191185  | 25.96057892 | 1  | 1  | 1.3  |
| 23.23502731 | 23.17803764 | 5  | 5  | 11.2 |
| 26.58820724 | 26.7425251  | 15 | 15 | 32.8 |



|             |             |    |    |      |
|-------------|-------------|----|----|------|
| 22.40564156 | 23.12063408 | 3  | 3  | 3.5  |
| 20.76765442 | 20.87590218 | 1  | 1  | 1.4  |
| 25.0754509  | 25.18252945 | 6  | 6  | 39   |
| 24.30180168 | 24.58439827 | 3  | 3  | 17.3 |
| 25.84993172 | 26.17822456 | 8  | 8  | 13.1 |
| 23.25076675 | 20.74549866 | 2  | 2  | 6.7  |
| 26.69431686 | 26.81053925 | 10 | 10 | 27.5 |
| 28.2927227  | 28.35640717 | 15 | 15 | 44.8 |
| 21.23613739 | 21.05205345 | 1  | 1  | 3.1  |
| 22.67977142 | 23.06287766 | 2  | 2  | 22.4 |
| 28.45148087 | 28.54940414 | 9  | 9  | 20.9 |
| 32.80952454 | 32.78904343 | 74 | 74 | 72.5 |
| 29.42534447 | 29.48089218 | 33 | 33 | 53.3 |
| 28.25408173 | 28.57513618 | 14 | 14 | 58.7 |
| 27.02369118 | 27.36836433 | 9  | 9  | 39.3 |
| 24.71035576 | 25.40791702 | 5  | 5  | 15.5 |
| 34.39400864 | 34.36345673 | 65 | 56 | 88.8 |
| 22.86782074 | 22.96280479 | 1  | 1  | 8.1  |
| 21.48492813 | 22.04766655 | 2  | 2  | 11.9 |
| 23.73892403 | 24.30096436 | 5  | 5  | 29.1 |
| 22.82842255 | 22.66661453 | 1  | 1  | 3.9  |
| 22.9183445  | 22.18842888 | 3  | 3  | 19   |
| 25.22545433 | 25.40999031 | 5  | 5  | 31.9 |
| 21.01386261 | 20.76943016 | 1  | 1  | 3    |
| 22.72984695 | 22.57839966 | 2  | 2  | 4.9  |
| 19.72609138 | 21.8006897  | 2  | 2  | 4.7  |
| 22.64138794 | 19.85634041 | 3  | 2  | 10.3 |
| 24.97211075 | 25.17371368 | 4  | 3  | 12.4 |
| 22.48059654 | 22.54063797 | 1  | 1  | 4.5  |
| 25.92913246 | 25.36853027 | 6  | 6  | 15.3 |
| 26.01788521 | 25.90403175 | 7  | 7  | 35.7 |
| 25.26094246 | 25.89774513 | 14 | 14 | 25.2 |
| 26.95371437 | 27.10059166 | 1  | 1  | 4.6  |
| 22.26719475 | 22.05543327 | 6  | 6  | 4.4  |
| 27.05961418 | 26.78606224 | 25 | 25 | 13.8 |
| 24.30632973 | 25.39920616 | 5  | 5  | 16.6 |
| 22.28217888 | 22.88026237 | 3  | 3  | 13   |
| 29.10041618 | 29.19335747 | 28 | 28 | 70.6 |
| 24.06019211 | 22.44133949 | 1  | 1  | 1.1  |
| 23.52695274 | 23.66925621 | 1  | 1  | 6.6  |
| 27.40405655 | 27.61294746 | 1  | 1  | 0.8  |

|             |             |    |    |      |
|-------------|-------------|----|----|------|
| 26.71253395 | 26.5696125  | 8  | 8  | 31.1 |
| 24.16061783 | 22.99982643 | 3  | 3  | 10.3 |
| 25.42431831 | 25.68244362 | 12 | 12 | 16.2 |
| 21.71866608 | 18.96220589 | 1  | 1  | 2    |
| 24.26999283 | 24.00744438 | 6  | 6  | 15.7 |
| 21.83124733 | 22.3955307  | 2  | 2  | 9.6  |
| 22.85222435 | 22.97277641 | 2  | 2  | 5.5  |
| 19.66091537 | 23.06463814 | 2  | 2  | 11.1 |
| 27.69212151 | 27.77799988 | 12 | 7  | 47.5 |
| 28.11971283 | 28.55189896 | 15 | 13 | 55.7 |
| 28.2853775  | 28.23365974 | 12 | 8  | 50.2 |
| 26.05920219 | 25.84856987 | 12 | 9  | 41.9 |
| 28.69756699 | 28.99765778 | 10 | 6  | 36.6 |
| 30.09295273 | 30.21858788 | 20 | 16 | 60   |
| 24.59485626 | 24.70767212 | 3  | 3  | 18.3 |
| 20.91488075 | 20.86725426 | 1  | 1  | 1.3  |
| 19.77473259 | 19.5729847  | 1  | 1  | 5.3  |
| 23.13028336 | 22.95414925 | 1  | 1  | 3.3  |
| 20.48529243 | 22.41565514 | 1  | 1  | 2.1  |
| 29.8678093  | 29.39382553 | 27 | 27 | 59   |

| Unique sequence coverage [%] | Mol. weight [kDa] | Q-value    | Score  | Intensity   |
|------------------------------|-------------------|------------|--------|-------------|
| 7.6                          | 47.13             | 0          | 7.5726 | 400600000   |
| 5.7                          | 36.3              | 0          | 4.9139 | 135020000   |
| 7.7                          | 67.354            | 0          | 31.722 | 347130000   |
| 3.6                          | 84.921            | 0          | 5.2015 | 147520000   |
| 3.5                          | 37.022            | 0.0035447  | 2.0961 | 63154000    |
| 6.2                          | 35.316            | 0          | 8.6343 | 445040000   |
| 6.8                          | 29.814            | 0          | 12.953 | 105620000   |
| 5.5                          | 48.994            | 0.00043573 | 3.323  | 32204000    |
| 10.9                         | 34.732            | 0.0012195  | 2.5349 | 177770000   |
| 7.1                          | 79.964            | 0          | 10.173 | 183470000   |
| 7.7                          | 46.297            | 0          | 7.4717 | 91331000    |
| 12.8                         | 24.752            | 0          | 12.131 | 174080000   |
| 17.9                         | 16.961            | 0          | 102.08 | 4221400000  |
| 72.2                         | 11.186            | 0          | 64.184 | 8378300000  |
| 7.6                          | 79.481            | 0          | 8.3432 | 175730000   |
| 4.4                          | 27.072            | 0          | 8.2727 | 170700000   |
| 8.7                          | 28.599            | 0          | 3.9923 | 5961400000  |
| 22.9                         | 72.367            | 0          | 42.71  | 2701200000  |
| 39.6                         | 191.36            | 0          | 323.31 | 19690000000 |
| 47.8                         | 53.497            | 0          | 210.78 | 3981800000  |
| 8.6                          | 54.734            | 0          | 6.9516 | 184930000   |
| 16.9                         | 17.024            | 0          | 7.9265 | 239820000   |
| 40.7                         | 34.45             | 0          | 77.193 | 1493800000  |
| 16.5                         | 22.794            | 0          | 7.3941 | 498250000   |
| 10.5                         | 48.763            | 0          | 39.317 | 730830000   |
| 17.9                         | 50.167            | 0          | 26.88  | 801810000   |
| 7                            | 106.25            | 0          | 17.007 | 679780000   |
| 3.5                          | 137.61            | 0          | 34.396 | 525050000   |
| 32.7                         | 63.299            | 0          | 85.369 | 5905700000  |
| 5.1                          | 105.54            | 0          | 9.3355 | 399420000   |
| 25.4                         | 121.96            | 0          | 92.052 | 4639400000  |
| 12.3                         | 235.9             | 0          | 44.735 | 1105200000  |
| 39.7                         | 7.3184            | 0          | 11.636 | 714590000   |
| 13.2                         | 31.966            | 0          | 10.395 | 258010000   |
| 15.2                         | 50.09             | 0          | 50.313 | 1054100000  |
| 8.2                          | 89.309            | 0          | 12.444 | 415620000   |
| 13.7                         | 123.43            | 0          | 64.044 | 1165900000  |

|      |        |   |        |             |
|------|--------|---|--------|-------------|
| 29.5 | 29.227 | 0 | 29.237 | 813480000   |
| 5.9  | 112.22 | 0 | 18.847 | 1038800000  |
| 29.4 | 246.32 | 0 | 323.31 | 20497000000 |
| 2.6  | 89.986 | 0 | 323.31 | 2.0418E+11  |
| 25.9 | 65.994 | 0 | 36.317 | 1059900000  |
| 21.7 | 53.398 | 0 | 34.521 | 773550000   |
| 39.8 | 23.995 | 0 | 128.43 | 13189000000 |
| 19.5 | 140.47 | 0 | 257.72 | 19664000000 |
| 28   | 64.774 | 0 | 72.02  | 3523600000  |
| 15   | 42.532 | 0 | 31.383 | 181080000   |
| 53.6 | 36.428 | 0 | 234.12 | 12547000000 |
| 30.4 | 46.7   | 0 | 108.32 | 6433000000  |
| 32.1 | 44.127 | 0 | 71.429 | 1984300000  |
| 28   | 63.691 | 0 | 58.349 | 3007100000  |
| 41.8 | 116.53 | 0 | 323.31 | 16928000000 |
| 39.8 | 100.29 | 0 | 323.31 | 27849000000 |
| 42.2 | 30.016 | 0 | 39.497 | 1206000000  |
| 25.9 | 69.886 | 0 | 106.43 | 1529800000  |
| 71.3 | 11.922 | 0 | 57     | 1903700000  |
| 24.1 | 128.36 | 0 | 245.88 | 9597600000  |
| 76.8 | 33.355 | 0 | 323.31 | 1.3822E+11  |
| 18.9 | 32.939 | 0 | 22.002 | 816170000   |
| 56.9 | 7.9972 | 0 | 17.702 | 801380000   |
| 44.7 | 71.937 | 0 | 249.95 | 55314000000 |
| 32.8 | 63.056 | 0 | 106.46 | 2220900000  |
| 56.1 | 46.533 | 0 | 278.66 | 32669000000 |
| 33.9 | 291.12 | 0 | 323.31 | 13526000000 |
| 36.4 | 10.344 | 0 | 16.801 | 2469500000  |
| 40.1 | 110.33 | 0 | 323.31 | 1.6492E+11  |
| 59.6 | 41.639 | 0 | 323.31 | 1.2076E+11  |
| 51.9 | 108.49 | 0 | 323.31 | 2.216E+11   |
| 79.9 | 22.395 | 0 | 323.31 | 2.4244E+11  |
| 54.2 | 51.373 | 0 | 205.7  | 20518000000 |
| 14.6 | 67.568 | 0 | 13.978 | 811090000   |
| 71.1 | 50.118 | 0 | 292.67 | 25725000000 |
| 3.5  | 161.72 | 0 | 13.841 | 678340000   |
| 36.5 | 107.58 | 0 | 293.9  | 15663000000 |
| 32.2 | 66.9   | 0 | 114.65 | 12709000000 |
| 38.2 | 150.92 | 0 | 226.36 | 10114000000 |
| 29.5 | 94.138 | 0 | 120.19 | 2751600000  |
| 57.6 | 103.07 | 0 | 323.31 | 1.5276E+11  |

|      |        |           |        |             |
|------|--------|-----------|--------|-------------|
| 54   | 61.936 | 0         | 314.51 | 26102000000 |
| 23.4 | 78.185 | 0         | 91.625 | 7199300000  |
| 17.5 | 86.41  | 0         | 57.953 | 2500500000  |
| 73.2 | 38.676 | 0         | 323.31 | 87976000000 |
| 29.2 | 252.31 | 0         | 323.31 | 12555000000 |
| 20.1 | 134.2  | 0         | 323.31 | 51640000000 |
| 13.6 | 49.184 | 0         | 26.913 | 837380000   |
| 40.6 | 43.953 | 0         | 323.31 | 40141000000 |
| 22.1 | 50.933 | 0         | 30.826 | 1405000000  |
| 0    | 42.009 | 0         | 14.074 | 1.2754E+11  |
| 53.2 | 41.525 | 0         | 198.24 | 6243900000  |
| 59.3 | 14.957 | 0         | 165.25 | 32217000000 |
| 44.7 | 77.8   | 0         | 323.31 | 18877000000 |
| 33.4 | 52.206 | 0         | 49.812 | 1979900000  |
| 51.1 | 35.915 | 0         | 242.93 | 4763700000  |
| 49   | 10.963 | 0         | 30.69  | 6147200000  |
| 45   | 25.97  | 0         | 265.2  | 96814000000 |
| 29.3 | 91.712 | 0         | 135.31 | 3169200000  |
| 73.7 | 35.752 | 0         | 262.33 | 51234000000 |
| 49.5 | 33.387 | 0         | 40.605 | 1367000000  |
| 34.7 | 24.423 | 0         | 44.216 | 3149100000  |
| 10.6 | 12.259 | 0         | 20.757 | 621650000   |
| 16.7 | 46.763 | 0         | 39.846 | 3535400000  |
| 18   | 113.24 | 0         | 49.521 | 3050700000  |
| 73.4 | 25.958 | 0         | 308.75 | 27009000000 |
| 8.6  | 54.084 | 0         | 14.332 | 362200000   |
| 34.7 | 30.641 | 0         | 43.949 | 1731700000  |
| 48.8 | 38.734 | 0         | 177.47 | 19782000000 |
| 45.7 | 97.183 | 0         | 268.63 | 8090300000  |
| 50.6 | 27.403 | 0         | 43.989 | 1832100000  |
| 44.7 | 14.015 | 0         | 26.347 | 886050000   |
| 6    | 273.61 | 0         | 34.303 | 924650000   |
| 45   | 47.408 | 0         | 98.049 | 2322100000  |
| 4.3  | 203.91 | 0         | 15.852 | 502260000   |
| 6.9  | 23.656 | 0         | 5.3473 | 616570000   |
| 11.9 | 17.587 | 0.0023923 | 2.2887 | 350640000   |
| 28.5 | 100.2  | 0         | 122.23 | 3316200000  |
| 10.4 | 26.791 | 0         | 5.2647 | 194490000   |
| 5.1  | 121.04 | 0         | 21.853 | 385230000   |
| 30.8 | 53.514 | 0         | 63.243 | 1496000000  |
| 14.4 | 76.765 | 0         | 12.988 | 305450000   |

|      |        |            |        |             |
|------|--------|------------|--------|-------------|
| 23.3 | 50.282 | 0          | 38.265 | 933560000   |
| 20.7 | 74.934 | 0          | 74.305 | 1919900000  |
| 12.5 | 58.951 | 0          | 16.062 | 773790000   |
| 39.4 | 58.004 | 0          | 101.37 | 3175800000  |
| 40.2 | 27.057 | 0          | 158.7  | 3064100000  |
| 2.9  | 217.75 | 0          | 14.731 | 415030000   |
| 40.9 | 32.88  | 0          | 40.457 | 1158300000  |
| 21.8 | 13.72  | 0          | 8.9437 | 286690000   |
| 24.2 | 14.203 | 0          | 10.881 | 1056600000  |
| 1.9  | 86.525 | 0          | 7.714  | 44691000    |
| 47.6 | 15.776 | 0          | 143.17 | 4540400000  |
| 16.1 | 192.91 | 0          | 141.97 | 3991300000  |
| 8.5  | 37.425 | 0          | 12.728 | 524960000   |
| 5.9  | 290.71 | 0          | 21.036 | 2328900000  |
| 7.9  | 146.56 | 0          | 20.767 | 379310000   |
| 20.6 | 46.247 | 0          | 45.344 | 497970000   |
| 14.1 | 51.012 | 0          | 10.903 | 155340000   |
| 25.2 | 22.45  | 0          | 49.508 | 1269500000  |
| 50.8 | 20.802 | 0          | 54.342 | 3647100000  |
| 19.6 | 32.851 | 0          | 13.836 | 911070000   |
| 39.1 | 29.47  | 0          | 100.88 | 1498100000  |
| 7.4  | 72.241 | 0          | 9.533  | 539950000   |
| 0.6  | 290.08 | 0          | 4.7852 | 40712000    |
| 2.7  | 117.64 | 0          | 3.946  | 233740000   |
| 30.3 | 37.778 | 0          | 41.59  | 886080000   |
| 16.4 | 12.436 | 0          | 16.222 | 38977000    |
| 14.4 | 66.612 | 0          | 40.252 | 323320000   |
| 1    | 116.89 | 0.00042373 | 3.0101 | 61420000    |
| 26.8 | 54.831 | 0          | 23.281 | 649380000   |
| 18.7 | 59.162 | 0          | 23.157 | 728570000   |
| 13   | 17.872 | 0          | 5.7932 | 28413000    |
| 21.3 | 39.771 | 0          | 14.28  | 816650000   |
| 4.4  | 69.622 | 0          | 11.872 | 104280000   |
| 4.8  | 39.617 | 0          | 17.749 | 275190000   |
| 16.9 | 82.967 | 0          | 21.336 | 753160000   |
| 8.5  | 29.718 | 0.0035377  | 2.0748 | 87679000    |
| 5    | 47.064 | 0          | 22.699 | 10930000000 |
| 3.8  | 30.26  | 0.00042105 | 2.9386 | 66975000    |
| 23.3 | 5.1161 | 0.0020072  | 2.3784 | 89647000    |
| 24.8 | 11.655 | 0          | 12.366 | 224200000   |
| 28.4 | 49.971 | 0          | 89.586 | 4781100000  |

|      |        |            |        |             |
|------|--------|------------|--------|-------------|
| 3.3  | 64.49  | 0          | 3.6421 | 29704000    |
| 7.4  | 25.746 | 0          | 18.603 | 72305000    |
| 0.7  | 244.25 | 0          | 3.8101 | 76978000    |
| 1.1  | 169.9  | 0.00041649 | 2.823  | 1274600000  |
| 4.4  | 83.516 | 0.0053456  | 1.7231 | 59626000    |
| 1.6  | 68.24  | 0.0020056  | 2.373  | 175080000   |
| 8.7  | 51.421 | 0          | 8.4826 | 276290000   |
| 6.9  | 55.759 | 0          | 4.6707 | 53409000    |
| 4.3  | 332.91 | 0          | 27.677 | 555910000   |
| 8.8  | 20.762 | 0.0008244  | 2.7303 | 101470000   |
| 1.9  | 81.182 | 0.0098253  | 1.3338 | 48515000    |
| 7.7  | 46.137 | 0          | 24.126 | 174230000   |
| 34.7 | 11.747 | 0          | 10.581 | 354160000   |
| 13.1 | 6.6973 | 0.0016214  | 2.5149 | 231480000   |
| 48.3 | 8.8225 | 0          | 26.499 | 307090000   |
| 36.7 | 165.85 | 0          | 323.31 | 17552000000 |
| 8.2  | 106.91 | 0          | 70.115 | 718330000   |
| 2.7  | 44.97  | 0.0087816  | 1.3885 | 45457000    |
| 12.8 | 50.236 | 0          | 91.958 | 694380000   |
| 1.9  | 176.16 | 0          | 8.4982 | 71840000    |
| 3.8  | 170.09 | 0          | 8.2935 | 203340000   |
| 6.8  | 75.474 | 0          | 9.26   | 282890000   |
| 11   | 67.314 | 0          | 35.318 | 372140000   |
| 1.2  | 94.944 | 0.00043103 | 3.21   | 80464000    |
| 25.4 | 33.56  | 0          | 5.5601 | 347770000   |
| 21.6 | 45.269 | 0          | 13.383 | 475580000   |
| 9.9  | 63.085 | 0          | 7.715  | 606330000   |
| 17.9 | 39.154 | 0          | 16.661 | 308130000   |
| 9.5  | 42.547 | 0          | 5.8146 | 144890000   |
| 2.2  | 62.003 | 0.00043879 | 3.4168 | 68982000    |
| 77.8 | 9.0303 | 0          | 25.861 | 1093700000  |
| 22.9 | 43.953 | 0          | 72.968 | 1584300000  |
| 83.1 | 41.829 | 0          | 323.31 | 25554000000 |
| 23   | 265.25 | 0          | 246.18 | 2548600000  |
| 3.9  | 118.98 | 0          | 7.3858 | 120750000   |
| 5.8  | 68.721 | 0.00041876 | 2.8853 | 190880000   |
| 45.3 | 47.907 | 0          | 322.03 | 13453000000 |
| 43.7 | 46.481 | 0          | 202.09 | 14705000000 |
| 47.8 | 44.889 | 0          | 73.325 | 5049600000  |
| 18.5 | 47.874 | 0          | 120.27 | 1369300000  |
| 74.5 | 70.875 | 0          | 323.31 | 11258000000 |

|      |        |            |        |             |
|------|--------|------------|--------|-------------|
| 11.4 | 221.94 | 0          | 200.94 | 7890300000  |
| 55.4 | 44.816 | 0          | 321.69 | 16308000000 |
| 29.7 | 41.297 | 0          | 61.287 | 1131100000  |
| 8    | 65.356 | 0          | 6.0731 | 158370000   |
| 40.1 | 119.73 | 0          | 317.91 | 10992000000 |
| 32.3 | 98.124 | 0          | 97.255 | 3101800000  |
| 65.4 | 85.462 | 0          | 323.31 | 41315000000 |
| 36.4 | 15.183 | 0          | 30.075 | 660590000   |
| 19.6 | 49.656 | 0          | 78.74  | 1339300000  |
| 6.5  | 37.555 | 0.00043197 | 3.2323 | 155120000   |
| 29.6 | 50.56  | 0          | 55.087 | 2696200000  |
| 20.3 | 17.941 | 0          | 21.217 | 915020000   |
| 10.1 | 67.95  | 0          | 13.979 | 138030000   |
| 3.4  | 65.076 | 0          | 5.0836 | 31704000    |
| 38.6 | 77.951 | 0          | 238.92 | 10622000000 |
| 16.5 | 76.205 | 0          | 23.891 | 211680000   |
| 4.5  | 41.736 | 0          | 77.927 | 7413900000  |
| 0    | 42.019 | 0          | 323.31 | 1.3397E+12  |
| 4.5  | 41.792 | 0          | 323.31 | 3.6943E+11  |
| 6.1  | 47.447 | 0          | 5.8253 | 143820000   |
| 53.9 | 104.98 | 0          | 323.31 | 19968000000 |
| 9.6  | 46.207 | 0          | 147.06 | 411790000   |
| 18.4 | 42.613 | 0          | 48.096 | 930670000   |
| 18.1 | 42.281 | 0          | 66.664 | 3863900000  |
| 51.8 | 44.76  | 0          | 269.62 | 8659700000  |
| 63.9 | 47.357 | 0          | 145    | 17154000000 |
| 28.3 | 11.241 | 0          | 5.8262 | 455300000   |
| 1.6  | 83.967 | 0.0087848  | 1.3913 | 43386000    |
| 2.2  | 113.22 | 0          | 4.3236 | 103560000   |
| 17.7 | 71.742 | 0          | 21.354 | 819370000   |
| 5.4  | 139.12 | 0          | 33.404 | 962190000   |
| 1.5  | 122.71 | 0.0077548  | 1.4666 | 64142000    |
| 7.7  | 75.406 | 0          | 15.15  | 237560000   |
| 54.3 | 39.547 | 0          | 132.09 | 2964300000  |
| 17.9 | 39.904 | 0          | 7.1263 | 181970000   |
| 13.8 | 26.809 | 0          | 7.966  | 577600000   |
| 28.8 | 40.148 | 0          | 66.045 | 1525900000  |
| 8.1  | 53.774 | 0.00042535 | 3.0721 | 77677000    |
| 2.9  | 79.656 | 0          | 5.1777 | 76555000    |
| 3.7  | 42.06  | 0          | 3.5472 | 34911000    |
| 33.9 | 54.866 | 0          | 76.724 | 1327600000  |



|      |        |            |        |             |
|------|--------|------------|--------|-------------|
| 7.2  | 50.254 | 0          | 6.0511 | 107060000   |
| 3.1  | 89.518 | 0          | 5.4691 | 192010000   |
| 6    | 49.275 | 0.0035322  | 2.0645 | 13872000    |
| 14.5 | 18.899 | 0          | 21.892 | 275150000   |
| 2.7  | 97.303 | 0          | 11.514 | 329720000   |
| 18   | 31.01  | 0          | 7.8844 | 193610000   |
| 11.9 | 198.33 | 0          | 47.847 | 1138300000  |
| 37   | 47.688 | 0          | 55.106 | 2295500000  |
| 10.8 | 58.951 | 0          | 8.1928 | 353570000   |
| 8.6  | 38.117 | 0          | 7.2044 | 327480000   |
| 36.2 | 37.325 | 0          | 158.85 | 15976000000 |
| 9.6  | 66.765 | 0          | 22.351 | 570350000   |
| 11.5 | 40.634 | 0          | 5.6663 | 129530000   |
| 20   | 33.997 | 0          | 28.86  | 872330000   |
| 11.6 | 35.377 | 0          | 15.902 | 412840000   |
| 17.6 | 37.605 | 0          | 12.032 | 236490000   |
| 52.1 | 21.539 | 0          | 138.84 | 5216900000  |
| 56.9 | 25.605 | 0          | 104    | 3388400000  |
| 70   | 25.426 | 0          | 61.923 | 4048300000  |
| 3.7  | 169.74 | 0          | 46.389 | 1217100000  |
| 56.9 | 36.586 | 0          | 132.49 | 3677900000  |
| 46.8 | 35.732 | 0          | 54.028 | 6631900000  |
| 3.2  | 35.988 | 0          | 5.2726 | 325260000   |
| 16.1 | 36.12  | 0          | 11.416 | 902890000   |
| 12.5 | 40.612 | 0          | 18.706 | 663090000   |
| 4.7  | 27.483 | 0.0067265  | 1.5497 | 124670000   |
| 10.9 | 36.023 | 0          | 18.85  | 266750000   |
| 74.7 | 68.692 | 0          | 323.31 | 3.5689E+11  |
| 16.5 | 65.091 | 0          | 15.397 | 518510000   |
| 1.6  | 84.755 | 0.0016168  | 2.477  | 30289000    |
| 1.5  | 87.052 | 0.00042992 | 3.1812 | 66509000    |
| 14.2 | 54.467 | 0          | 28.214 | 245350000   |
| 5.1  | 101.59 | 0          | 11.011 | 125130000   |
| 66.7 | 56.537 | 0          | 323.31 | 40297000000 |
| 17.6 | 53.97  | 0          | 24.167 | 1541400000  |
| 17.3 | 61.84  | 0          | 79.723 | 703840000   |
| 5.5  | 55.968 | 0.00041374 | 2.7667 | 88961000    |
| 50.7 | 57.915 | 0          | 180.08 | 6345000000  |
| 37   | 55.644 | 0          | 103.66 | 2918100000  |
| 80.8 | 39.355 | 0          | 295.16 | 21083000000 |
| 3.9  | 47.404 | 0          | 5.0584 | 50903000    |

|      |        |            |        |             |
|------|--------|------------|--------|-------------|
| 8.1  | 18.136 | 0.0063838  | 1.5803 | 31480000    |
| 29.4 | 17.682 | 0          | 4.5879 | 419140000   |
| 2.4  | 215.99 | 0          | 6.3528 | 110680000   |
| 23.4 | 192.03 | 0          | 178.05 | 3561500000  |
| 1.7  | 426.26 | 0          | 7.6955 | 238370000   |
| 4.4  | 128.65 | 0          | 33.897 | 141760000   |
| 12   | 69.262 | 0          | 9.7832 | 361280000   |
| 21.1 | 28.537 | 0          | 80.802 | 800730000   |
| 11.4 | 31.078 | 0          | 9.4119 | 752680000   |
| 13.3 | 28.245 | 0          | 11.978 | 820600000   |
| 37.7 | 109.65 | 0          | 323.31 | 8430300000  |
| 32   | 54.079 | 0          | 126.84 | 6669000000  |
| 56.7 | 36.384 | 0          | 165.99 | 11342000000 |
| 70.9 | 75.884 | 0          | 323.31 | 73210000000 |
| 22.9 | 49.925 | 0          | 57.734 | 5135400000  |
| 48.4 | 84.533 | 0          | 323.31 | 79048000000 |
| 3.2  | 146.68 | 0          | 5.0626 | 205490000   |
| 9.2  | 103.93 | 0          | 21.135 | 671040000   |
| 5.6  | 91.349 | 0          | 8.0562 | 198290000   |
| 23.7 | 105.48 | 0          | 102.29 | 3431600000  |
| 25.9 | 104.02 | 0          | 178.7  | 5882200000  |
| 23.9 | 104.58 | 0          | 202.67 | 6565600000  |
| 29.9 | 49.654 | 0          | 43.826 | 2394900000  |
| 11.3 | 17.018 | 0.00043122 | 3.2121 | 551820000   |
| 5.2  | 122.74 | 0          | 15.687 | 401640000   |
| 3.3  | 135.08 | 0          | 5.0933 | 161930000   |
| 15.8 | 35.49  | 0          | 13.165 | 295140000   |
| 7.7  | 56.784 | 0          | 37.592 | 551020000   |
| 13.7 | 46.434 | 0          | 17.658 | 461590000   |
| 61   | 30.615 | 0          | 128.01 | 8805600000  |
| 46.5 | 30.972 | 0          | 59.131 | 3553400000  |
| 32.4 | 11.309 | 0          | 32.094 | 740480000   |
| 48.9 | 45.029 | 0          | 65.078 | 3369600000  |
| 10.2 | 9.6963 | 0.0081121  | 1.439  | 435490000   |
| 21.6 | 10.741 | 0          | 29.216 | 228390000   |
| 18.6 | 35.866 | 0          | 15.403 | 796730000   |
| 36.5 | 38.618 | 0          | 39.032 | 3683600000  |
| 19.5 | 18.798 | 0          | 18.082 | 160450000   |
| 27.9 | 29.26  | 0          | 30.903 | 591380000   |
| 15.7 | 79.327 | 0          | 25.957 | 549870000   |
| 25.6 | 19.724 | 0          | 15.864 | 919320000   |

|      |        |            |        |             |
|------|--------|------------|--------|-------------|
| 23   | 28.793 | 0          | 80.105 | 2279300000  |
| 22.9 | 57.229 | 0          | 30.12  | 922780000   |
| 39.8 | 20.697 | 0          | 104.8  | 4860500000  |
| 9.9  | 20.746 | 0.00042409 | 3.0274 | 104670000   |
| 23.9 | 20.396 | 0          | 67.909 | 2463500000  |
| 13.9 | 20.529 | 0          | 7.779  | 187750000   |
| 21.7 | 20.082 | 0          | 4.5485 | 121240000   |
| 2.5  | 202.24 | 0          | 8.3954 | 52942000    |
| 44   | 50.41  | 0          | 78.682 | 2348700000  |
| 8    | 79.818 | 0          | 12.812 | 168870000   |
| 1.4  | 229.72 | 0.0057143  | 1.6988 | 4568700000  |
| 74   | 23.407 | 0          | 94.112 | 8915400000  |
| 23.5 | 22.851 | 0          | 15.422 | 290520000   |
| 7.4  | 108.53 | 0          | 9.5104 | 370720000   |
| 7.1  | 79.695 | 0          | 7.4201 | 218250000   |
| 13.8 | 20.411 | 0          | 49.835 | 391790000   |
| 35.2 | 20.486 | 0          | 13.894 | 871350000   |
| 4.9  | 23.437 | 0.00041459 | 2.7848 | 148050000   |
| 28.7 | 21.557 | 0          | 80.777 | 1668800000  |
| 30.1 | 21.539 | 0          | 33.235 | 800430000   |
| 27   | 31.246 | 0.00043802 | 3.4071 | 290410000   |
| 31.7 | 41.063 | 0          | 91.169 | 8116500000  |
| 42   | 34.357 | 0          | 107.78 | 4653200000  |
| 53.9 | 20.524 | 0          | 33.243 | 5356800000  |
| 66.7 | 19.667 | 0          | 125.63 | 8106100000  |
| 29.1 | 16.288 | 0          | 7.0956 | 1052300000  |
| 16.3 | 16.98  | 0          | 13.594 | 685420000   |
| 19.8 | 44.669 | 0          | 39.578 | 956110000   |
| 19.2 | 51.739 | 0          | 37.096 | 342540000   |
| 17.5 | 38.822 | 0          | 7.3528 | 359240000   |
| 19.3 | 83.041 | 0          | 74.028 | 1623500000  |
| 54.2 | 42.572 | 0          | 308.94 | 65270000000 |
| 3.1  | 33.95  | 0.00041442 | 2.7843 | 72788000    |
| 4.3  | 57.428 | 0          | 4.7269 | 119490000   |
| 6.9  | 32.402 | 0          | 4.8567 | 156640000   |
| 4.9  | 77.519 | 0          | 10.343 | 135880000   |
| 48.8 | 64.217 | 0          | 157.84 | 4762600000  |
| 4.1  | 66.223 | 0.00042882 | 3.1637 | 199640000   |
| 46.8 | 60.574 | 0          | 212.36 | 6599200000  |
| 58.8 | 7.3384 | 0          | 42.984 | 1783800000  |
| 14.8 | 112.98 | 0          | 100.17 | 4232600000  |

|      |        |            |        |             |
|------|--------|------------|--------|-------------|
| 12.5 | 35.194 | 0          | 11.246 | 505120000   |
| 39.6 | 31.775 | 0          | 14.342 | 1219700000  |
| 18.6 | 109.75 | 0          | 192.37 | 4855800000  |
| 6.3  | 112.3  | 0          | 19.965 | 319540000   |
| 1.1  | 134.75 | 0.00041528 | 2.7916 | 60779000    |
| 10.1 | 122.29 | 0          | 54.812 | 1880100000  |
| 61.7 | 59.752 | 0          | 323.31 | 43839000000 |
| 73.5 | 56.3   | 0          | 323.31 | 82640000000 |
| 42.6 | 32.886 | 0          | 92.378 | 3902200000  |
| 22.7 | 28.948 | 0          | 28.853 | 5653400000  |
| 76.4 | 18.749 | 0          | 91.949 | 4442900000  |
| 33.8 | 8.2355 | 0          | 8.5163 | 902860000   |
| 9.3  | 12.496 | 0.00041511 | 2.7853 | 237230000   |
| 41.7 | 11.424 | 0          | 18.964 | 2098000000  |
| 62.4 | 23.363 | 0          | 137.93 | 14384000000 |
| 1.2  | 95.622 | 0.0020088  | 2.3841 | 39729000    |
| 6.6  | 40.301 | 0          | 6.4183 | 336640000   |
| 23.8 | 68.325 | 0          | 94.554 | 1232900000  |
| 4.3  | 56.55  | 0          | 3.9674 | 65807000    |
| 19.5 | 26.157 | 0          | 28.674 | 332600000   |
| 12   | 53.706 | 0          | 5.0238 | 120840000   |
| 9.6  | 33.395 | 0          | 4.1173 | 173830000   |
| 4.5  | 98.19  | 0          | 6.4731 | 221160000   |
| 40.3 | 13.779 | 0          | 11.851 | 690850000   |
| 2.7  | 41.909 | 0.0042373  | 1.8319 | 78502000    |
| 26.3 | 61.859 | 0          | 18.068 | 843580000   |
| 2.7  | 50.942 | 0          | 4.3363 | 74518000    |
| 62.9 | 10.102 | 0          | 30.407 | 6015400000  |
| 6.8  | 21.394 | 0          | 6.0397 | 193390000   |
| 46   | 67.669 | 0          | 169.69 | 9655800000  |
| 3    | 94.391 | 0          | 6.7535 | 24007000    |
| 1.8  | 101.02 | 0.00081633 | 2.5794 | 72911000    |
| 12.2 | 50.37  | 0          | 28.293 | 366370000   |
| 18   | 35.504 | 0          | 7.3681 | 432230000   |
| 4.1  | 46.587 | 0          | 6.2511 | 132130000   |
| 26.4 | 52.511 | 0          | 28.471 | 902030000   |
| 25.8 | 33.524 | 0          | 34.597 | 764750000   |
| 58.3 | 22.197 | 0          | 47.566 | 1099800000  |
| 4.6  | 29.978 | 0.0042275  | 1.7903 | 25303000    |
| 36.7 | 33.196 | 0          | 18.027 | 664170000   |
| 5.7  | 28.09  | 0.0016201  | 2.506  | 27761000    |

|      |        |            |        |             |
|------|--------|------------|--------|-------------|
| 39.8 | 11.832 | 0          | 89.453 | 118560000   |
| 14.2 | 17.699 | 0          | 6.1045 | 51822000    |
| 1.7  | 76.437 | 0          | 4.0872 | 41405000    |
| 25.5 | 31.013 | 0          | 46.311 | 1103600000  |
| 29.7 | 186.48 | 0          | 117.61 | 4463800000  |
| 9.2  | 51.523 | 0.00081766 | 2.5987 | 1805700000  |
| 2.9  | 188.88 | 0          | 5.9504 | 135690000   |
| 4.2  | 62.002 | 0.00041894 | 2.8875 | 73964000    |
| 11.9 | 28.33  | 0          | 6.1149 | 303280000   |
| 68.1 | 29.032 | 0          | 135.15 | 4822100000  |
| 84.6 | 29.366 | 0          | 249.06 | 14412000000 |
| 26.7 | 39.842 | 0          | 56.197 | 1240100000  |
| 12.7 | 26.51  | 0          | 8.3966 | 127430000   |
| 1.6  | 235.85 | 0          | 9.5059 | 153500000   |
| 49.7 | 16.837 | 0          | 168.53 | 3732400000  |
| 45.4 | 47.994 | 0          | 99.441 | 5250700000  |
| 11.7 | 37.063 | 0          | 21.87  | 435350000   |
| 8.6  | 41.624 | 0          | 5.7082 | 282090000   |
| 27.2 | 54.113 | 0          | 110.87 | 4761900000  |
| 16.4 | 55.96  | 0          | 71.222 | 1998000000  |
| 6.8  | 32.542 | 0          | 4.9167 | 82662000    |
| 35.8 | 136.33 | 0          | 250.77 | 7382500000  |
| 33.5 | 67.277 | 0          | 116.84 | 7884300000  |
| 74.3 | 51.564 | 0          | 323.31 | 38732000000 |
| 29.6 | 52.861 | 0          | 83.638 | 3087900000  |
| 22.7 | 39.24  | 0          | 55.406 | 967270000   |
| 18   | 82.105 | 0          | 28.901 | 549380000   |
| 40   | 79.871 | 0          | 212.51 | 10122000000 |
| 47.2 | 28.463 | 0          | 209.04 | 11355000000 |
| 8.3  | 78.168 | 0          | 3.745  | 83205000    |
| 28   | 32.967 | 0          | 80.94  | 5045900000  |
| 49.3 | 30.628 | 0          | 77.176 | 4512300000  |
| 43.2 | 16.062 | 0          | 8.5806 | 551710000   |
| 3.1  | 35.217 | 0          | 59.254 | 1364200000  |
| 3    | 32.151 | 0.00043611 | 3.3341 | 114510000   |
| 3.1  | 63.459 | 0.0027679  | 2.1941 | 82351000    |
| 2.9  | 85.55  | 0.00043271 | 3.2532 | 9353300     |
| 2.9  | 55.356 | 0.0027756  | 2.2278 | 27222000    |
| 14.3 | 46.377 | 0          | 12.282 | 7561700000  |
| 6.8  | 79.694 | 0          | 17.254 | 485640000   |
| 27.7 | 59.795 | 0          | 98.574 | 897480000   |

|      |        |           |        |             |
|------|--------|-----------|--------|-------------|
| 57.9 | 20.538 | 0         | 80.794 | 13977000000 |
| 37   | 18.227 | 0         | 15.962 | 1280300000  |
| 15.9 | 30.953 | 0         | 9.1695 | 357050000   |
| 3.4  | 124.74 | 0         | 4.8882 | 108580000   |
| 1.5  | 103    | 0         | 6.2704 | 72515000    |
| 6    | 47.32  | 0         | 5.7362 | 130460000   |
| 9.8  | 19.152 | 0         | 5.6912 | 68988000    |
| 13.8 | 54.865 | 0         | 16.331 | 614280000   |
| 5.7  | 107.61 | 0         | 20.111 | 561980000   |
| 16.4 | 29.596 | 0         | 25.368 | 1045300000  |
| 4.7  | 36.561 | 0         | 4.8234 | 52427000    |
| 56.4 | 57.477 | 0         | 143    | 6642700000  |
| 36.5 | 60.629 | 0         | 97.761 | 4136800000  |
| 35.6 | 58.066 | 0         | 98.794 | 2783200000  |
| 53.6 | 59.623 | 0         | 206.81 | 4974100000  |
| 39.3 | 59.652 | 0         | 99.037 | 3441500000  |
| 24.8 | 59.555 | 0         | 41.912 | 2533500000  |
| 13   | 161.66 | 0         | 133.48 | 1400400000  |
| 13.4 | 28.246 | 0         | 4.5311 | 636800000   |
| 2.7  | 120.92 | 0         | 6.3005 | 78479000    |
| 25.5 | 31.256 | 0         | 24.985 | 1579300000  |
| 6    | 70.449 | 0         | 6.4296 | 247360000   |
| 8.6  | 35.262 | 0.001221  | 2.545  | 553350000   |
| 33.5 | 52.697 | 0         | 58.501 | 3943200000  |
| 3.3  | 39.998 | 0         | 3.4566 | 130900000   |
| 4.6  | 33.097 | 0         | 14.222 | 997230000   |
| 27.5 | 25.814 | 0         | 166.01 | 6394400000  |
| 11.5 | 25.258 | 0         | 107.92 | 4399200000  |
| 11.3 | 80.433 | 0         | 16.934 | 754380000   |
| 27.4 | 16.782 | 0         | 30.68  | 271710000   |
| 13.2 | 44.593 | 0         | 13.507 | 699770000   |
| 51.3 | 21.258 | 0         | 72.23  | 4084500000  |
| 6    | 194.75 | 0         | 13.561 | 464570000   |
| 2.4  | 88.354 | 0         | 3.8092 | 37397000    |
| 6.1  | 23.599 | 0         | 4.2842 | 34347000    |
| 2.5  | 158.13 | 0.0035101 | 1.9858 | 71309000    |
| 6.5  | 33.288 | 0         | 4.9745 | 90730000    |
| 14.6 | 51.313 | 0         | 32.321 | 337510000   |
| 11.7 | 55.409 | 0         | 17.835 | 301740000   |
| 23.4 | 27.541 | 0         | 14.211 | 606520000   |
| 33.8 | 61.055 | 0         | 68.782 | 3334000000  |

|      |        |            |        |             |
|------|--------|------------|--------|-------------|
| 50.6 | 61.787 | 0          | 228.3  | 13704000000 |
| 9.3  | 85.004 | 0          | 20.922 | 430520000   |
| 10.1 | 27.985 | 0.003517   | 2.0109 | 206130000   |
| 21.4 | 139.14 | 0          | 87.083 | 4622300000  |
| 9.8  | 67.26  | 0          | 5.1683 | 204290000   |
| 63.3 | 18.559 | 0          | 187.86 | 18439000000 |
| 41.6 | 18.709 | 0          | 36.863 | 1216300000  |
| 21.6 | 26.334 | 0          | 12.578 | 420610000   |
| 10.6 | 29.852 | 0          | 6.6186 | 320790000   |
| 5.4  | 25.219 | 0.001624   | 2.5227 | 189200000   |
| 15.6 | 24.936 | 0          | 7.2142 | 250040000   |
| 4.1  | 49.398 | 0.006734   | 1.5515 | 55622000    |
| 18.3 | 21.978 | 0          | 5.5258 | 124790000   |
| 30.6 | 12.097 | 0          | 12.153 | 1008400000  |
| 59.6 | 42.713 | 0          | 323.31 | 35885000000 |
| 42.3 | 43.044 | 0          | 98.566 | 2052700000  |
| 5.2  | 167.94 | 0          | 13.658 | 380700000   |
| 4.5  | 60.621 | 0.0042324  | 1.7991 | 82092000    |
| 3.3  | 34.595 | 0.00042212 | 2.9791 | 36691000    |
| 53.5 | 22.257 | 0          | 46.737 | 795520000   |
| 47.7 | 27.013 | 0          | 40.686 | 2951500000  |
| 70   | 28.729 | 0          | 223.14 | 10051000000 |
| 2.2  | 51.425 | 0.00042194 | 2.9706 | 52558000    |
| 3    | 62.183 | 0          | 6.155  | 89487000    |
| 9.5  | 23.174 | 0          | 4.0927 | 138930000   |
| 55.5 | 191.55 | 0          | 323.31 | 41377000000 |
| 23.2 | 51.655 | 0          | 130.09 | 2914200000  |
| 23.1 | 37.548 | 0          | 30.911 | 1315200000  |
| 36.8 | 27.586 | 0          | 110.34 | 4370900000  |
| 36.2 | 22.165 | 0          | 24.065 | 1003800000  |
| 8.8  | 18.742 | 0          | 7.1767 | 485530000   |
| 31.8 | 52.767 | 0          | 24.025 | 1861500000  |
| 32.5 | 33.155 | 0          | 229.99 | 9851600000  |
| 23.2 | 44.654 | 0          | 47.331 | 296830000   |
| 11   | 20.767 | 0          | 9.3505 | 91894000    |
| 4.9  | 28.093 | 0          | 3.4848 | 70658000    |
| 9.3  | 11.987 | 0.00041477 | 2.785  | 138140000   |
| 9.1  | 62.022 | 0          | 7.6819 | 173590000   |
| 8.1  | 206.08 | 0          | 63.894 | 1210200000  |
| 11.7 | 138.03 | 0          | 312.54 | 3.1366E+11  |
| 20   | 129.56 | 0          | 190.18 | 1.58E+11    |

|      |        |           |        |             |
|------|--------|-----------|--------|-------------|
| 3    | 131.86 | 0         | 15.937 | 36705000000 |
| 2    | 138.94 | 0         | 17.752 | 1825800000  |
| 7.5  | 160.68 | 0         | 237.12 | 55197000000 |
| 14.8 | 167.32 | 0         | 260.45 | 42744000000 |
| 2.1  | 164.09 | 0         | 9.4439 | 248090000   |
| 6    | 183.77 | 0         | 254.5  | 5574100000  |
| 6.3  | 145.02 | 0         | 87.62  | 4745200000  |
| 7.2  | 289.57 | 0         | 87.26  | 1660800000  |
| 7.6  | 71.06  | 0         | 6.1355 | 312370000   |
| 24.6 | 22.037 | 0         | 12.457 | 150260000   |
| 7.5  | 21.86  | 0.0060583 | 1.6619 | 32267000    |
| 13.6 | 21.85  | 0         | 31.388 | 259460000   |
| 44.1 | 24.707 | 0         | 55.754 | 656340000   |
| 6.1  | 28.96  | 0         | 4.585  | 111290000   |
| 28.9 | 138.43 | 0         | 83.807 | 2786300000  |
| 22.7 | 107.06 | 0         | 73.83  | 1887700000  |
| 9.6  | 102.45 | 0         | 17.662 | 427670000   |
| 43.8 | 34.567 | 0         | 72.594 | 978920000   |
| 21.2 | 97.512 | 0         | 71.76  | 2250900000  |
| 6    | 97.55  | 0         | 5.0957 | 106020000   |
| 19.4 | 51.596 | 0         | 84.088 | 1632500000  |
| 18   | 47.832 | 0         | 28.101 | 835770000   |
| 19.5 | 46.284 | 0         | 24.904 | 466370000   |
| 6.9  | 37.548 | 0         | 8.9075 | 355790000   |
| 7.1  | 35.88  | 0.002769  | 2.1944 | 83388000    |
| 21.1 | 30.224 | 0         | 18.364 | 281780000   |
| 20.9 | 20.198 | 0         | 9.9118 | 227890000   |
| 5.3  | 21.693 | 0         | 3.6376 | 79417000    |
| 18.5 | 51.392 | 0         | 16.651 | 376970000   |
| 12.1 | 35.082 | 0         | 11.974 | 528740000   |
| 16.3 | 50.989 | 0         | 5.0661 | 109050000   |
| 17.4 | 53.912 | 0         | 20.237 | 1304500000  |
| 37.8 | 53.12  | 0         | 103.74 | 7668900000  |
| 11.3 | 15.944 | 0         | 5.0826 | 42797000    |
| 36.1 | 19.53  | 0         | 52.973 | 3848700000  |
| 54.8 | 16.101 | 0         | 119.92 | 12116000000 |
| 51.6 | 13.813 | 0         | 19.876 | 2920300000  |
| 61.3 | 12.352 | 0         | 71.751 | 11673000000 |
| 70.9 | 10.071 | 0         | 32.939 | 5606700000  |
| 59.2 | 8.4689 | 0         | 18.717 | 1912500000  |
| 16.2 | 8.9863 | 0         | 6.2094 | 1823700000  |



|      |        |            |        |             |
|------|--------|------------|--------|-------------|
| 56.6 | 9.2908 | 0          | 13.015 | 1512300000  |
| 14.3 | 7.3325 | 0.0020048  | 2.3519 | 257470000   |
| 14.8 | 121.15 | 0          | 35.358 | 1138200000  |
| 31.9 | 48.789 | 0          | 75.685 | 4864000000  |
| 10.5 | 53.255 | 0          | 13.861 | 441460000   |
| 20.1 | 58.886 | 0          | 87.549 | 2242300000  |
| 8.9  | 61.035 | 0          | 6.1842 | 173460000   |
| 18.4 | 59.584 | 0          | 93.26  | 2280700000  |
| 2.9  | 49.714 | 0          | 3.4781 | 28798000    |
| 10.9 | 30.333 | 0          | 5.9812 | 75423000    |
| 12.3 | 51.813 | 0          | 12.661 | 542450000   |
| 7.4  | 59.152 | 0          | 54.861 | 1043500000  |
| 10.5 | 26.192 | 0          | 10.592 | 377080000   |
| 6.7  | 88.25  | 0          | 13.85  | 472990000   |
| 11.7 | 88.216 | 0          | 25.016 | 783720000   |
| 33.3 | 73.98  | 0          | 116.63 | 2433600000  |
| 2.3  | 49.074 | 0.0023866  | 2.2566 | 163080000   |
| 31.2 | 70.839 | 0          | 40.544 | 1047800000  |
| 3.8  | 45.717 | 0          | 5.5301 | 55255000    |
| 71.4 | 8.5497 | 0          | 89.598 | 26443000000 |
| 71.2 | 22.727 | 0          | 154    | 21204000000 |
| 29.6 | 33.814 | 0          | 17.308 | 854770000   |
| 5    | 33.83  | 0          | 3.5663 | 155910000   |
| 30.9 | 20.069 | 0          | 15.858 | 1420100000  |
| 26.6 | 35.208 | 0          | 19.944 | 737880000   |
| 10   | 35.268 | 0          | 4.864  | 292850000   |
| 50   | 51.736 | 0          | 323.31 | 30932000000 |
| 29   | 55.144 | 0          | 48.381 | 1365700000  |
| 14.3 | 110.45 | 0          | 55.993 | 4351900000  |
| 8.9  | 50.716 | 0          | 4.7119 | 320860000   |
| 13.2 | 37.567 | 0          | 6.3494 | 157920000   |
| 21.5 | 45.133 | 0          | 26.277 | 736920000   |
| 7.9  | 24.942 | 0          | 4.4908 | 300890000   |
| 64.8 | 20.583 | 0          | 323.31 | 36528000000 |
| 67.4 | 20.926 | 0          | 181.23 | 21202000000 |
| 9.3  | 15.531 | 0.00041563 | 2.8038 | 83055000    |
| 33.7 | 11.045 | 0          | 15.806 | 1087200000  |
| 9.1  | 61.341 | 0          | 8.7446 | 231550000   |
| 19.1 | 46.614 | 0          | 65.389 | 906220000   |
| 2.4  | 83.745 | 0          | 9.3668 | 30274000    |
| 13.4 | 100.11 | 0          | 83.916 | 1850600000  |

|      |        |            |        |             |
|------|--------|------------|--------|-------------|
| 2    | 100.42 | 0          | 6.4214 | 144480000   |
| 5.7  | 99.802 | 0          | 13.036 | 173080000   |
| 5.2  | 81.462 | 0          | 14.794 | 261780000   |
| 15.1 | 85.47  | 0          | 33.819 | 1491300000  |
| 3.6  | 64.979 | 0.0027778  | 2.2308 | 47146000    |
| 14.1 | 101.74 | 0          | 25.498 | 816290000   |
| 25.4 | 37.279 | 0          | 59.279 | 1337400000  |
| 37.1 | 44.953 | 0          | 52.623 | 6533000000  |
| 11.1 | 37.17  | 0          | 16.967 | 354440000   |
| 11.2 | 61.249 | 0          | 28.215 | 548990000   |
| 3.1  | 69.84  | 0          | 5.0559 | 148330000   |
| 5.5  | 89.69  | 0          | 10.735 | 145210000   |
| 4.2  | 88.947 | 0          | 6.0782 | 197200000   |
| 3.2  | 87.752 | 0          | 8.0381 | 103160000   |
| 5    | 90.973 | 0          | 10.653 | 172420000   |
| 18.6 | 18.865 | 0          | 22.108 | 1691500000  |
| 8.1  | 29.003 | 0.00042034 | 2.9282 | 78093000    |
| 15.7 | 10.032 | 0          | 9.5733 | 104800000   |
| 32.1 | 15.241 | 0          | 12.424 | 747250000   |
| 32.2 | 16.318 | 0          | 21.984 | 409270000   |
| 27.9 | 34.134 | 0          | 25.084 | 397530000   |
| 83.5 | 31.549 | 0          | 311.38 | 27404000000 |
| 5.3  | 20.921 | 0          | 5.1883 | 239910000   |
| 58.6 | 29.497 | 0          | 118.79 | 4643400000  |
| 39   | 11.605 | 0          | 33.334 | 4541600000  |
| 13   | 144.98 | 0          | 31.57  | 1651700000  |
| 37.9 | 21.465 | 0          | 43.183 | 1117200000  |
| 7.4  | 52.149 | 0          | 14.841 | 321150000   |
| 3.5  | 55.948 | 0.0035143  | 2.0049 | 17082000    |
| 5.9  | 58.9   | 0          | 3.9006 | 52634000    |
| 53.8 | 28.09  | 0          | 91.171 | 5990200000  |
| 4.9  | 122.27 | 0          | 12.37  | 149770000   |
| 5.1  | 58.821 | 0          | 4.8016 | 90225000    |
| 17.1 | 96.904 | 0          | 64.945 | 2207200000  |
| 19.8 | 57.147 | 0          | 22.012 | 2305600000  |
| 14.6 | 43.086 | 0          | 9.1212 | 74977000    |
| 39.1 | 10     | 0          | 87.928 | 4022900000  |
| 22.2 | 48.341 | 0          | 16.872 | 716650000   |
| 26.1 | 53.246 | 0          | 41.744 | 2104600000  |
| 51.1 | 39.809 | 0          | 323.31 | 1.2758E+11  |
| 20.7 | 38.988 | 0          | 26.873 | 445770000   |

|      |        |            |        |             |
|------|--------|------------|--------|-------------|
| 13.6 | 138.2  | 0          | 58.263 | 1614800000  |
| 35.1 | 44.116 | 0          | 79.04  | 2572900000  |
| 8.6  | 20.978 | 0          | 7.342  | 98773000    |
| 5.5  | 20.14  | 0.00042355 | 3.0083 | 30617000    |
| 43.9 | 29.645 | 0          | 72.344 | 2622000000  |
| 8.6  | 126.85 | 0          | 31.531 | 917980000   |
| 3.3  | 79.576 | 0.0035363  | 2.0748 | 18456000    |
| 30.2 | 49.027 | 0          | 107.46 | 3204100000  |
| 5.4  | 35.977 | 0          | 4.0751 | 287950000   |
| 95.8 | 13.077 | 0          | 65.828 | 3974900000  |
| 16.5 | 82.499 | 0          | 122.42 | 2766700000  |
| 12.5 | 72.399 | 0          | 18.735 | 484670000   |
| 3.9  | 93.55  | 0.00043535 | 3.3195 | 112460000   |
| 3    | 42.104 | 0          | 4.5608 | 105500000   |
| 27.8 | 49.035 | 0          | 60.223 | 3377700000  |
| 7.7  | 73.101 | 0          | 108.58 | 4026200000  |
| 6.7  | 73.427 | 0          | 12.75  | 350490000   |
| 2.7  | 101.96 | 0          | 4.6763 | 710250000   |
| 19.1 | 69.289 | 0          | 50.072 | 3039300000  |
| 5.3  | 82.175 | 0          | 3.8431 | 2009900000  |
| 7.5  | 54.191 | 0          | 4.8139 | 167630000   |
| 55.2 | 36.213 | 0          | 187.7  | 9157600000  |
| 8.7  | 43.158 | 0          | 7.6611 | 552420000   |
| 7.6  | 28.834 | 0          | 11.34  | 226500000   |
| 22.8 | 36.3   | 0          | 25.741 | 691190000   |
| 24.6 | 34.005 | 0          | 21.861 | 502820000   |
| 8    | 33.982 | 0          | 5.1587 | 97429000    |
| 4.5  | 91.006 | 0          | 6.9853 | 212060000   |
| 2.1  | 153.97 | 0          | 3.9336 | 11718000    |
| 10.9 | 149.47 | 0          | 61.359 | 2392300000  |
| 5.9  | 139.34 | 0          | 14.211 | 131920000   |
| 6.7  | 57.401 | 0          | 3.4735 | 135590000   |
| 37.7 | 67.941 | 0          | 178.4  | 11245000000 |
| 31   | 54.272 | 0          | 96.568 | 8473700000  |
| 31.5 | 48.994 | 0          | 64.236 | 5495000000  |
| 35.7 | 425.83 | 0          | 323.31 | 25368000000 |
| 11.9 | 46.531 | 0          | 13.114 | 299440000   |
| 9.3  | 44.868 | 0          | 48.96  | 519920000   |
| 9.2  | 45.745 | 0          | 19.507 | 578230000   |
| 5.4  | 46.847 | 0          | 13.886 | 178170000   |
| 28.5 | 37.781 | 0          | 32.978 | 1919700000  |

|      |        |            |        |             |
|------|--------|------------|--------|-------------|
| 2.4  | 90.582 | 0.0023962  | 2.3032 | 157610000   |
| 5.5  | 63.232 | 0          | 13.003 | 243750000   |
| 10.3 | 57.463 | 0          | 17.13  | 241200000   |
| 0    | 96.056 | 0.00041408 | 2.77   | 32629000    |
| 45.4 | 78.01  | 0          | 132.81 | 3212800000  |
| 15.8 | 97.732 | 0          | 59.349 | 2215400000  |
| 3.6  | 241.18 | 0          | 17.045 | 325750000   |
| 60.7 | 45.722 | 0          | 318.63 | 11241000000 |
| 21.3 | 82.897 | 0          | 21.064 | 505020000   |
| 2    | 56.253 | 0          | 5.4967 | 74634000    |
| 45.5 | 11.213 | 0          | 38.474 | 2129700000  |
| 56.1 | 62.277 | 0          | 320.04 | 17362000000 |
| 10.7 | 22.278 | 0.00043459 | 3.3119 | 46152000    |
| 0.9  | 834.21 | 0          | 75.082 | 171230000   |
| 77.6 | 18.521 | 0          | 203.86 | 70525000000 |
| 13.3 | 18.05  | 0          | 5.3827 | 56652000    |
| 27.6 | 77.732 | 0          | 83.813 | 2516900000  |
| 5.5  | 24.18  | 0.003506   | 1.9738 | 8164200000  |
| 38.9 | 20.472 | 0          | 76.342 | 1574500000  |
| 30.9 | 532.04 | 0          | 323.31 | 23096000000 |
| 5.6  | 68.393 | 0          | 88.21  | 412850000   |
| 22.2 | 56.614 | 0          | 62.991 | 1215100000  |
| 27   | 10.366 | 0          | 14.854 | 5606500000  |
| 38.5 | 10.99  | 0          | 16.131 | 901600000   |
| 15.9 | 12.483 | 0.00043592 | 3.3234 | 61113000    |
| 49.1 | 12.957 | 0          | 27.907 | 277530000   |
| 36.1 | 36.118 | 0          | 134.36 | 1398900000  |
| 7.2  | 28.824 | 0          | 16.154 | 68011000    |
| 51   | 31.474 | 0          | 147.61 | 6572700000  |
| 59.5 | 32.25  | 0          | 147.96 | 6965100000  |
| 16.8 | 39.503 | 0          | 20.547 | 496340000   |
| 17.5 | 62.832 | 0          | 21.03  | 1228200000  |
| 3.2  | 49.798 | 0          | 4.0994 | 67244000    |
| 42.2 | 50.113 | 0          | 319.08 | 73565000000 |
| 30.7 | 24.693 | 0          | 34.682 | 2536000000  |
| 33.8 | 31.293 | 0          | 67.039 | 1858700000  |
| 17.8 | 19.859 | 0.00043403 | 3.2945 | 80603000    |
| 39.6 | 50.06  | 0          | 88.619 | 5164200000  |
| 55.1 | 95.313 | 0          | 323.31 | 22863000000 |
| 30   | 54.952 | 0          | 70.472 | 5337200000  |
| 29.8 | 49.425 | 0          | 157.08 | 3717300000  |

|      |        |   |        |             |
|------|--------|---|--------|-------------|
| 20.8 | 26.999 | 0 | 19.789 | 535040000   |
| 5    | 92.612 | 0 | 9.9338 | 187510000   |
| 11.5 | 109.36 | 0 | 12.3   | 509680000   |
| 5.8  | 134.85 | 0 | 19.407 | 304630000   |
| 7.2  | 83.947 | 0 | 43.626 | 225600000   |
| 40.6 | 60.602 | 0 | 99.506 | 5381200000  |
| 74   | 61.174 | 0 | 323.31 | 91289000000 |
| 10.7 | 60.82  | 0 | 22.032 | 214290000   |
| 46.8 | 61.48  | 0 | 156.64 | 7917600000  |
| 25.4 | 36.108 | 0 | 13.206 | 531630000   |
| 11   | 51.065 | 0 | 9.7172 | 531720000   |
| 11.7 | 161.93 | 0 | 35.11  | 1880100000  |
| 7.2  | 91.369 | 0 | 9.5342 | 398090000   |
| 12   | 105.53 | 0 | 23.791 | 805110000   |
| 12.2 | 63.988 | 0 | 40.942 | 447820000   |
| 26.1 | 52.22  | 0 | 23.952 | 463820000   |
| 31.9 | 37.984 | 0 | 52.338 | 1951100000  |
| 7.2  | 35.638 | 0 | 4.4639 | 219090000   |
| 8    | 39.832 | 0 | 10.558 | 318010000   |
| 10   | 29.343 | 0 | 7.592  | 320400000   |
| 7.6  | 21.307 | 0 | 4.5533 | 257150000   |
| 13.6 | 42.516 | 0 | 62.679 | 651050000   |
| 24.1 | 46.153 | 0 | 97.639 | 5434300000  |
| 11.3 | 46.402 | 0 | 25.282 | 574090000   |
| 9.2  | 46.839 | 0 | 7.4801 | 627410000   |
| 13.9 | 68.839 | 0 | 101.05 | 1241400000  |
| 12.9 | 25.053 | 0 | 5.6181 | 295110000   |
| 4.6  | 174.58 | 0 | 19.148 | 640710000   |
| 13.7 | 97.893 | 0 | 14.792 | 464340000   |
| 38.6 | 25.186 | 0 | 24.883 | 1024000000  |
| 14.5 | 48.968 | 0 | 25.615 | 640680000   |
| 83.8 | 16.832 | 0 | 123.54 | 5225400000  |
| 26.4 | 36.169 | 0 | 32.078 | 937620000   |
| 4.7  | 32.677 | 0 | 18.215 | 864940000   |
| 7.2  | 111.29 | 0 | 11.086 | 316110000   |
| 12.6 | 23.348 | 0 | 5.2773 | 153110000   |
| 38.6 | 29.435 | 0 | 36.636 | 1513000000  |
| 27.9 | 70.733 | 0 | 91.195 | 3018300000  |
| 28.2 | 56.356 | 0 | 162.2  | 5525600000  |
| 28.1 | 55.262 | 0 | 60.763 | 3679700000  |
| 55.3 | 47.14  | 0 | 323.31 | 30832000000 |

|      |        |            |        |             |
|------|--------|------------|--------|-------------|
| 3.7  | 47.296 | 0          | 7.5293 | 48377000    |
| 15   | 47.024 | 0          | 12.209 | 312260000   |
| 21.8 | 107.96 | 0          | 56.515 | 1605800000  |
| 8.7  | 103.08 | 0          | 11.149 | 305640000   |
| 10.6 | 98.661 | 0          | 15.632 | 497000000   |
| 2.4  | 47.903 | 0.00041806 | 2.8713 | 46553000    |
| 26.7 | 57.205 | 0          | 175.61 | 4164000000  |
| 31.1 | 54.319 | 0          | 147.67 | 13583000000 |
| 5.3  | 89.663 | 0          | 11.205 | 340320000   |
| 5.8  | 109.94 | 0          | 23.776 | 871010000   |
| 60.4 | 52.576 | 0          | 125.73 | 10303000000 |
| 17.3 | 62.515 | 0          | 26.425 | 593900000   |
| 1.7  | 60.211 | 0.0016181  | 2.4916 | 113680000   |
| 2.9  | 62.253 | 0          | 4.1722 | 163260000   |
| 4.9  | 723.3  | 0          | 6.3    | 158620000   |
| 16.3 | 170.08 | 0          | 69.325 | 2182600000  |
| 3.2  | 98.47  | 0          | 4.8461 | 95222000    |
| 3.3  | 82.228 | 0.00081599 | 2.5739 | 61385000    |
| 4.6  | 106.6  | 0          | 7.8899 | 202760000   |
| 0.9  | 154.33 | 0.00082068 | 2.6617 | 20517000    |
| 15.9 | 32.562 | 0          | 20.676 | 808270000   |
| 22.1 | 28.823 | 0          | 8.7953 | 631490000   |
| 33.5 | 46.852 | 0          | 29.727 | 1369200000  |
| 62.4 | 31.319 | 0          | 129.71 | 7202800000  |
| 32.6 | 121.55 | 0          | 236.98 | 10772000000 |
| 5.3  | 49.03  | 0          | 3.7753 | 291280000   |
| 62.8 | 35.009 | 0          | 240.11 | 26576000000 |
| 58.8 | 27.623 | 0          | 183.48 | 8324700000  |
| 21.1 | 68.09  | 0          | 74.429 | 2483800000  |
| 42.5 | 27.738 | 0          | 52.611 | 1279300000  |
| 1.1  | 103.96 | 0.003882   | 1.9335 | 37140000    |
| 3.8  | 94.128 | 0          | 12.522 | 256660000   |
| 23.5 | 83.206 | 0          | 48.334 | 2687600000  |
| 17.2 | 70.268 | 0          | 17.618 | 1221000000  |
| 24.1 | 14.819 | 0          | 11.571 | 821000000   |
| 75.8 | 14.65  | 0          | 123.85 | 7878700000  |
| 13.9 | 52.471 | 0          | 12.488 | 188770000   |
| 43.7 | 46.175 | 0          | 36.602 | 1812100000  |
| 9.5  | 61.012 | 0          | 40.142 | 470660000   |
| 7.6  | 121.64 | 0          | 13.601 | 141220000   |
| 40.3 | 102.65 | 0          | 207.43 | 5168200000  |

|      |        |            |        |             |
|------|--------|------------|--------|-------------|
| 19.2 | 84.818 | 0          | 71.61  | 653500000   |
| 12.3 | 17.725 | 0          | 5.4276 | 474510000   |
| 5.3  | 46.942 | 0.0004344  | 3.2982 | 77331000    |
| 11   | 24.394 | 0          | 5.1809 | 203010000   |
| 2.7  | 39.593 | 0.0063886  | 1.5896 | 1975400000  |
| 3.3  | 55.055 | 0          | 33.535 | 136360000   |
| 2.8  | 45.349 | 0          | 3.6279 | 110990000   |
| 18.9 | 57.598 | 0          | 27.651 | 782690000   |
| 12.6 | 65.696 | 0          | 14.323 | 728540000   |
| 59.3 | 272.43 | 0          | 323.31 | 46198000000 |
| 18.6 | 6.6478 | 0          | 4.8061 | 1198000000  |
| 13.5 | 34.306 | 0          | 17.368 | 779990000   |
| 65.6 | 41.026 | 0          | 244.12 | 38703000000 |
| 5    | 78.032 | 0          | 14.852 | 308980000   |
| 2.9  | 75.283 | 0          | 5.5982 | 270510000   |
| 11.9 | 126.5  | 0          | 73.299 | 3419400000  |
| 42.2 | 50.193 | 0          | 323.31 | 1.6749E+11  |
| 43.3 | 312.3  | 0          | 323.31 | 2.3922E+11  |
| 1.2  | 313.82 | 0          | 36.564 | 485300000   |
| 4.7  | 33.676 | 0.00043821 | 3.4085 | 106710000   |
| 8.7  | 82.687 | 0          | 23.681 | 199530000   |
| 6.8  | 34.492 | 0          | 3.6207 | 50779000    |
| 9    | 40.092 | 0.0098289  | 1.3338 | 128910000   |
| 4.1  | 88.733 | 0          | 8.2892 | 110150000   |
| 12.7 | 40.581 | 0          | 9.9006 | 118570000   |
| 7.2  | 75.634 | 0          | 30.153 | 401020000   |
| 11.6 | 42.712 | 0          | 3.6232 | 100020000   |
| 49.2 | 61.325 | 0          | 323.31 | 19138000000 |
| 68.2 | 54.752 | 0          | 323.31 | 33474000000 |
| 15.5 | 17.417 | 0          | 5.4781 | 192550000   |
| 57.6 | 49.391 | 0          | 323.31 | 38879000000 |
| 4.4  | 48.95  | 0          | 5.2515 | 42284000    |
| 57.4 | 50.052 | 0          | 207.19 | 10889000000 |
| 69.6 | 31.888 | 0          | 288.52 | 29411000000 |
| 35.3 | 31.794 | 0          | 33.973 | 651950000   |
| 12.2 | 101.85 | 0          | 63.39  | 1384100000  |
| 27.6 | 17.008 | 0          | 124.66 | 2420300000  |
| 5.3  | 64.697 | 0          | 7.462  | 352200000   |
| 8.6  | 15.344 | 0          | 4.2006 | 318990000   |
| 11.2 | 25.147 | 0          | 5.8925 | 116730000   |
| 12   | 51.572 | 0          | 14.072 | 683570000   |

|      |        |            |        |             |
|------|--------|------------|--------|-------------|
| 12.5 | 62.995 | 0          | 11.744 | 479330000   |
| 18.6 | 144.8  | 0          | 94.22  | 3408100000  |
| 73.7 | 281.22 | 0          | 323.31 | 9.9382E+11  |
| 21.5 | 277.82 | 0          | 259.32 | 5437000000  |
| 24.5 | 47.513 | 0          | 33.227 | 901760000   |
| 23.7 | 41.658 | 0          | 29.172 | 1248100000  |
| 3.4  | 111.28 | 0          | 10.292 | 123440000   |
| 28.2 | 59.914 | 0          | 51.494 | 2872300000  |
| 60.4 | 60.974 | 0          | 296.97 | 32521000000 |
| 16.7 | 60.515 | 0          | 33.319 | 700870000   |
| 29.3 | 43.054 | 0          | 143.18 | 3711800000  |
| 3.4  | 47.18  | 0          | 4.2865 | 83026000    |
| 51.7 | 272.53 | 0          | 323.31 | 1.5461E+11  |
| 15.4 | 44.013 | 0          | 13.115 | 254450000   |
| 2.4  | 84.573 | 0.0060514  | 1.6473 | 104010000   |
| 1    | 339.09 | 0.006056   | 1.6612 | 1527700000  |
| 11.4 | 34.554 | 0          | 18.581 | 315270000   |
| 57.7 | 21.066 | 0          | 35.711 | 2532400000  |
| 7.3  | 16.564 | 0.00042337 | 3.0009 | 134850000   |
| 7.9  | 52.673 | 0          | 15.763 | 520020000   |
| 6.5  | 60.815 | 0          | 19.351 | 317680000   |
| 13.8 | 51.828 | 0          | 26.303 | 1036500000  |
| 13.6 | 50.784 | 0          | 4.9123 | 216640000   |
| 37.7 | 59.262 | 0          | 92.82  | 2082800000  |
| 3.1  | 106.25 | 0          | 6.5392 | 130610000   |
| 14.5 | 13.918 | 0.0049751  | 1.7295 | 30611000    |
| 1.8  | 138.34 | 0          | 26.992 | 74765000    |
| 30.4 | 42.295 | 0          | 44.478 | 1408500000  |
| 4.7  | 37.798 | 0          | 10.923 | 116910000   |
| 20.8 | 26.336 | 0          | 8.1545 | 275830000   |
| 34.3 | 106.91 | 0          | 152.82 | 5591500000  |
| 69.1 | 35.81  | 0          | 323.31 | 1.414E+11   |
| 4.5  | 81.877 | 0.00042937 | 3.1672 | 211590000   |
| 10.5 | 107.5  | 0          | 18.874 | 528190000   |
| 25.3 | 32.932 | 0          | 39.603 | 563520000   |
| 8.8  | 80.363 | 0          | 11.818 | 321140000   |
| 12.9 | 66.739 | 0          | 33.077 | 497700000   |
| 42.9 | 53.6   | 0          | 160.91 | 6132600000  |
| 4.3  | 44.93  | 0          | 6.4351 | 86551000    |
| 4.8  | 48.605 | 0          | 4.5379 | 160980000   |
| 6.5  | 293.02 | 0          | 38.1   | 549530000   |



|      |        |           |        |             |
|------|--------|-----------|--------|-------------|
| 44.7 | 50.521 | 0         | 106.12 | 4575800000  |
| 58.2 | 50.537 | 0         | 313.78 | 16988000000 |
| 3.7  | 87.194 | 0         | 6.9336 | 55113000    |
| 10.5 | 26.778 | 0         | 9.427  | 156470000   |
| 9.1  | 24.554 | 0         | 6.8303 | 57798000    |
| 1.8  | 85.299 | 0         | 5.8461 | 235370000   |
| 2.5  | 78.765 | 0         | 5.8592 | 251260000   |
| 12.2 | 133.73 | 0         | 36.054 | 1299300000  |
| 54.9 | 20.809 | 0         | 39.745 | 5555000000  |
| 25.8 | 32.409 | 0         | 20.701 | 1242000000  |
| 23.4 | 11.871 | 0         | 12.446 | 1177200000  |
| 12.4 | 23.689 | 0         | 13.07  | 312150000   |
| 55   | 61.336 | 0         | 226.02 | 11416000000 |
| 30   | 42.119 | 0         | 77.76  | 1006000000  |
| 9    | 59.715 | 0         | 16.165 | 284200000   |
| 23.9 | 16.723 | 0         | 8.828  | 260180000   |
| 8.8  | 46.244 | 0         | 5.8217 | 256160000   |
| 13.6 | 39.916 | 0         | 15.426 | 560270000   |
| 8.1  | 76.723 | 0.0038775 | 1.9023 | 158010000   |
| 8.4  | 42.024 | 0         | 30.181 | 1592200000  |
| 9    | 44.054 | 0         | 7.4714 | 207070000   |
| 4.2  | 40.361 | 0         | 6.7526 | 228120000   |
| 31.5 | 40.489 | 0         | 166.12 | 6186700000  |
| 0    | 40.036 | 0         | 33.117 | 879390000   |
| 8.8  | 40.084 | 0         | 8.5384 | 80267000    |
| 18.7 | 42.158 | 0         | 51.492 | 1647800000  |
| 27.1 | 44.265 | 0         | 18.722 | 1730400000  |
| 29.7 | 37.377 | 0         | 109.36 | 1756200000  |
| 31.8 | 37.331 | 0         | 145.82 | 4418500000  |
| 50.5 | 35.076 | 0         | 89.344 | 3459000000  |
| 14.4 | 37.379 | 0         | 12.655 | 206800000   |
| 8.8  | 30.913 | 0         | 4.5619 | 118320000   |
| 6    | 20.791 | 0.000818  | 2.602  | 87819000    |
| 2.6  | 110.05 | 0         | 3.9887 | 77137000    |
| 11.2 | 39.661 | 0         | 26.043 | 319800000   |
| 18.4 | 24.725 | 0         | 10.918 | 54861000    |
| 60.2 | 47.411 | 0         | 226.26 | 12748000000 |
| 11.3 | 63.467 | 0         | 62.789 | 192690000   |
| 5.2  | 62.586 | 0         | 6.2954 | 161760000   |
| 63   | 37.572 | 0         | 212.85 | 6910700000  |
| 21.9 | 34.634 | 0         | 35.446 | 2369100000  |

|      |        |            |        |             |
|------|--------|------------|--------|-------------|
| 53.8 | 80.953 | 0          | 198.43 | 9884800000  |
| 50.9 | 62.766 | 0          | 323.31 | 38713000000 |
| 3.5  | 63.675 | 0.0094787  | 1.3574 | 42810000    |
| 9.3  | 53.442 | 0          | 8.2902 | 123310000   |
| 74.6 | 22.329 | 0          | 111.11 | 9034200000  |
| 32.3 | 25.424 | 0          | 41.832 | 11566000000 |
| 6.5  | 19.522 | 0          | 3.7634 | 328910000   |
| 9.1  | 21.061 | 0          | 3.8972 | 244400000   |
| 35.5 | 25.238 | 0          | 11.809 | 480050000   |
| 36.9 | 35.328 | 0          | 107.15 | 4078400000  |
| 10.5 | 63.458 | 0          | 20.423 | 891020000   |
| 14.3 | 24.307 | 0          | 7.2867 | 127640000   |
| 3.5  | 51.66  | 0          | 4.9264 | 100980000   |
| 6.9  | 46.71  | 0          | 8.0968 | 207250000   |
| 2.3  | 85.941 | 0          | 323.31 | 33662000000 |
| 1.2  | 80.762 | 0.00082576 | 2.7561 | 417970000   |
| 21.9 | 51.073 | 0          | 24.785 | 1007700000  |
| 7.2  | 52.246 | 0          | 8.9633 | 209520000   |
| 5.4  | 25.36  | 0.0031596  | 2.1598 | 96788000    |
| 48.2 | 25.704 | 0          | 31.433 | 1224300000  |
| 57.8 | 25.716 | 0          | 93.383 | 17334000000 |
| 24.6 | 26.635 | 0          | 11.54  | 438180000   |
| 12.8 | 25.709 | 0          | 5.9021 | 298300000   |
| 16.7 | 27.497 | 0          | 25.998 | 387250000   |
| 63.3 | 23.609 | 0          | 323.31 | 47664000000 |
| 64.6 | 27.374 | 0          | 94.909 | 4490900000  |
| 20.9 | 27.634 | 0          | 7.2704 | 334830000   |
| 41.7 | 24.275 | 0          | 50.524 | 746150000   |
| 6.8  | 106.05 | 0          | 12.933 | 182900000   |
| 38.5 | 77.587 | 0          | 82.066 | 4457300000  |
| 25.5 | 70.597 | 0          | 65.366 | 1628600000  |
| 24.7 | 34.47  | 0          | 26.89  | 442590000   |
| 30.6 | 37.402 | 0          | 24.597 | 413790000   |
| 3.3  | 83.926 | 0          | 3.8567 | 111290000   |
| 27.8 | 20.861 | 0          | 23.31  | 10305000000 |
| 14.5 | 28.093 | 0.00042845 | 3.1591 | 18642000    |
| 14.1 | 40.836 | 0          | 22.396 | 1014300000  |
| 16.3 | 41.301 | 0          | 6.9868 | 146560000   |
| 15.1 | 37.251 | 0          | 7.8413 | 291620000   |
| 46.9 | 13.509 | 0          | 82.267 | 5612700000  |
| 33.6 | 39.289 | 0          | 133.5  | 8727900000  |

|      |        |            |        |             |
|------|--------|------------|--------|-------------|
| 12.1 | 40.092 | 0          | 6.2688 | 583290000   |
| 23.5 | 15.328 | 0          | 105.45 | 96672000000 |
| 13.2 | 88.927 | 0          | 11.14  | 380030000   |
| 62.4 | 34.463 | 0          | 302.99 | 19682000000 |
| 62.9 | 82.669 | 0          | 323.31 | 48147000000 |
| 67.6 | 51.386 | 0          | 305.17 | 23328000000 |
| 8.8  | 28.901 | 0          | 5.5203 | 199290000   |
| 14.5 | 9.352  | 0.00043422 | 3.2974 | 236390000   |
| 22.8 | 40.477 | 0          | 24.497 | 1015800000  |
| 13.9 | 57.432 | 0          | 5.0734 | 522820000   |
| 6.1  | 31.654 | 0          | 8.9603 | 57921000    |
| 65.5 | 15.085 | 0          | 270.52 | 4.526E+11   |
| 58.5 | 15.84  | 0          | 323.31 | 5.5827E+11  |
| 21.8 | 15.878 | 0          | 36.843 | 1140800000  |
| 6.8  | 16.494 | 0.0031571  | 2.1513 | 146040000   |
| 3.8  | 210.43 | 0          | 28.615 | 348220000   |
| 1.8  | 55.302 | 0.0004386  | 3.4115 | 219770000   |
| 7.2  | 26.268 | 0          | 9.4911 | 474020000   |
| 23.8 | 22.43  | 0          | 35.251 | 960890000   |
| 35.1 | 28.73  | 0          | 19.584 | 710560000   |
| 11.4 | 141.74 | 0          | 31.59  | 1002300000  |
| 9.8  | 60.612 | 0          | 10.331 | 181760000   |
| 1.9  | 61.115 | 0.0035006  | 1.9446 | 47237000    |
| 4.4  | 86.014 | 0          | 4.4582 | 62634000    |
| 40.3 | 35.44  | 0          | 156.75 | 3338600000  |
| 39.5 | 43.037 | 0          | 51.357 | 1546300000  |
| 23.2 | 10.425 | 0          | 13.3   | 121430000   |
| 72.2 | 13.777 | 0          | 97.196 | 6332300000  |
| 39.9 | 17.32  | 0          | 10.869 | 763670000   |
| 16   | 115.2  | 0          | 46.819 | 944900000   |
| 19.2 | 21.785 | 0          | 9.9724 | 551540000   |
| 10.3 | 22.576 | 0          | 7.609  | 1140300000  |
| 14.2 | 21.266 | 0          | 54.657 | 16895000000 |
| 7.2  | 22.099 | 0          | 5.2574 | 223300000   |
| 13.2 | 21.977 | 0          | 17.024 | 10937000000 |
| 36.2 | 14.135 | 0          | 41.369 | 821440000   |
| 49.2 | 13.992 | 0          | 81.232 | 1.7456E+11  |
| 23.5 | 15.404 | 0          | 72.944 | 25703000000 |
| 23.5 | 15.388 | 0          | 131.15 | 1.1843E+11  |
| 58.3 | 11.367 | 0          | 248.99 | 1.4573E+11  |
| 5.4  | 14.013 | 0.0023981  | 2.3097 | 334230000   |

|      |        |            |        |             |
|------|--------|------------|--------|-------------|
| 14   | 13.988 | 0          | 240.18 | 1.8844E+11  |
| 24   | 102.3  | 0          | 173.32 | 6911800000  |
| 12.4 | 102.53 | 0          | 102.55 | 1684800000  |
| 11.3 | 37.78  | 0          | 10.3   | 143670000   |
| 33.5 | 24.893 | 0          | 96.77  | 14384000000 |
| 7.6  | 24.162 | 0.00042753 | 3.1424 | 333090000   |
| 28.3 | 34.238 | 0          | 21.358 | 329590000   |
| 10.8 | 56.822 | 0          | 7.2962 | 327110000   |
| 14.4 | 9.4226 | 0.00122    | 2.541  | 138190000   |
| 5.7  | 45.343 | 0          | 3.9694 | 240450000   |
| 17.8 | 35.738 | 0          | 11.538 | 186520000   |
| 9.2  | 30.53  | 0          | 3.8985 | 84518000    |
| 27.2 | 34.196 | 0          | 38.169 | 785790000   |
| 57.8 | 32.46  | 0          | 195.92 | 6186500000  |
| 45.1 | 37.086 | 0          | 119.2  | 7079900000  |
| 24.6 | 30.831 | 0          | 21.111 | 2322800000  |
| 18.2 | 32.223 | 0          | 10.328 | 709490000   |
| 20.9 | 30.777 | 0          | 31.905 | 3519600000  |
| 15.6 | 33.558 | 0.00043687 | 3.3584 | 240580000   |
| 20.7 | 45.729 | 0          | 39.626 | 1082400000  |
| 10.2 | 49.199 | 0          | 156.35 | 2636800000  |
| 3.8  | 49.279 | 0          | 17.85  | 410020000   |
| 35.4 | 50.976 | 0          | 202.04 | 12238000000 |
| 30.4 | 63.963 | 0          | 113.23 | 4188400000  |
| 8.1  | 64.124 | 0          | 5.1972 | 205050000   |
| 25.9 | 73.74  | 0          | 58.987 | 3827700000  |
| 35.2 | 87.917 | 0          | 210.4  | 10848000000 |
| 7.8  | 85.045 | 0          | 6.3159 | 524300000   |
| 15.2 | 84.939 | 0          | 31.299 | 852850000   |
| 5.7  | 83.217 | 0          | 15.97  | 122830000   |
| 2.8  | 31.363 | 0.006391   | 1.5938 | 35775000    |
| 8.4  | 38.752 | 0          | 8.0057 | 33606000    |
| 29.4 | 59.548 | 0          | 79.734 | 5989200000  |
| 10.4 | 22.338 | 0          | 5.8957 | 283480000   |
| 18.8 | 24.57  | 0          | 7.3663 | 414640000   |
| 49.1 | 51.317 | 0          | 87.556 | 5183700000  |
| 25   | 8.6107 | 0          | 32.211 | 224760000   |
| 6.5  | 32.364 | 0          | 3.7566 | 92429000    |
| 41   | 27.418 | 0          | 110.15 | 7599000000  |
| 20.5 | 34.741 | 0          | 20.761 | 1482100000  |
| 19.2 | 54.208 | 0          | 24.114 | 311710000   |

|      |        |            |        |             |
|------|--------|------------|--------|-------------|
| 26.7 | 84.787 | 0          | 269.02 | 7963600000  |
| 35.1 | 83.28  | 0          | 323.31 | 26927000000 |
| 39.5 | 92.475 | 0          | 323.31 | 18264000000 |
| 8.4  | 74.87  | 0          | 12.396 | 400420000   |
| 16.8 | 76.118 | 0          | 56.173 | 1312600000  |
| 4.2  | 70.078 | 0          | 205.47 | 14381000000 |
| 4.4  | 70.175 | 0          | 7.6628 | 628000000   |
| 28   | 69.641 | 0          | 78.173 | 3461300000  |
| 32.9 | 94.132 | 0          | 163.73 | 5519400000  |
| 5.6  | 92.251 | 0          | 6.3583 | 406440000   |
| 47.3 | 72.421 | 0          | 279.25 | 21077000000 |
| 32.5 | 70.87  | 0          | 323.31 | 63657000000 |
| 31.8 | 73.46  | 0          | 141.51 | 6537500000  |
| 80.4 | 23.014 | 0          | 323.31 | 30193000000 |
| 53.1 | 17.521 | 0          | 95.623 | 2125300000  |
| 53.8 | 18.634 | 0          | 44.725 | 1064500000  |
| 18.9 | 21.533 | 0          | 12.954 | 573100000   |
| 61.8 | 60.955 | 0          | 318.46 | 26059000000 |
| 50.6 | 398.29 | 0          | 323.31 | 3.5945E+11  |
| 19.5 | 91.696 | 0          | 95.256 | 1039500000  |
| 31.7 | 51.213 | 0          | 60.959 | 6885800000  |
| 3.6  | 480.89 | 0          | 27.362 | 381600000   |
| 20.3 | 111.18 | 0          | 53.036 | 2329300000  |
| 18.5 | 27.974 | 0.00042517 | 3.0648 | 129630000   |
| 1.2  | 144.27 | 0.0008261  | 2.7579 | 105250000   |
| 20.1 | 112.8  | 0          | 73.8   | 2267800000  |
| 4.3  | 58.752 | 0          | 4.2861 | 75292000    |
| 2.5  | 31.39  | 0.000429   | 3.1641 | 103540000   |
| 5.8  | 117.77 | 0          | 20.483 | 179450000   |
| 31.9 | 46.674 | 0          | 81.964 | 4297700000  |
| 39.8 | 50.906 | 0          | 142.62 | 17063000000 |
| 44.8 | 39.638 | 0          | 192.45 | 21477000000 |
| 43   | 42.785 | 0          | 99.818 | 3796500000  |
| 11.5 | 31.875 | 0          | 7.4922 | 135610000   |
| 3.8  | 38.97  | 0          | 3.9435 | 96861000    |
| 3.2  | 66.959 | 0.0046065  | 1.762  | 47525000    |
| 6.3  | 25.346 | 0          | 30.495 | 273210000   |
| 42.7 | 28.969 | 0          | 112.28 | 10965000000 |
| 15.2 | 36.587 | 0          | 21.502 | 1088900000  |
| 3.1  | 35.704 | 0.0027767  | 2.2296 | 89933000    |
| 53.3 | 11.934 | 0          | 33.362 | 1639100000  |

|      |        |           |        |             |
|------|--------|-----------|--------|-------------|
| 11.9 | 38.476 | 0         | 6.0116 | 95696000    |
| 2.1  | 86.689 | 0         | 7.6181 | 97024000    |
| 13.1 | 43.062 | 0         | 11.292 | 472900000   |
| 6.6  | 78.092 | 0.0023895 | 2.27   | 214720000   |
| 9.7  | 42.812 | 0         | 5.7421 | 85970000    |
| 37.9 | 78.727 | 0         | 133.99 | 6812000000  |
| 18.8 | 30.436 | 0         | 15.015 | 1011500000  |
| 4.3  | 137.49 | 0         | 23.883 | 320710000   |
| 51.5 | 29.459 | 0         | 95.219 | 1742900000  |
| 8.6  | 43.346 | 0         | 22.877 | 612550000   |
| 1.6  | 117.94 | 0         | 4.909  | 35146000    |
| 2.6  | 119.27 | 0         | 7.4106 | 82482000    |
| 20.7 | 123.59 | 0         | 171.97 | 1753400000  |
| 11.5 | 119.49 | 0         | 31.059 | 743160000   |
| 4.4  | 116.05 | 0         | 9.7135 | 124060000   |
| 39.7 | 188.74 | 0         | 323.31 | 15468000000 |
| 3.7  | 80.564 | 0.0035239 | 2.04   | 3664100000  |
| 11.8 | 17.897 | 0         | 5.4986 | 104330000   |
| 20.8 | 45.614 | 0         | 16.086 | 4954100000  |
| 4.7  | 32.032 | 0.0064006 | 1.6064 | 69863000    |
| 54.9 | 22.417 | 0         | 179.91 | 3928300000  |
| 14.5 | 60.931 | 0         | 17.779 | 332270000   |
| 1.2  | 98.992 | 0.0035419 | 2.0858 | 21225000    |
| 5.3  | 130.81 | 0         | 16.981 | 498940000   |
| 18.4 | 112.68 | 0         | 93.602 | 925710000   |
| 15.4 | 116.74 | 0         | 47.077 | 1987900000  |
| 14.2 | 115.04 | 0         | 38.095 | 1676100000  |
| 3    | 119.6  | 0         | 10.71  | 86160000    |
| 43.8 | 117.55 | 0         | 323.31 | 34651000000 |
| 11.8 | 114.41 | 0         | 48.918 | 1523100000  |
| 20.1 | 115.36 | 0         | 103.92 | 5425400000  |
| 41.6 | 88.231 | 0         | 323.31 | 50735000000 |
| 15.1 | 86.738 | 0         | 18.829 | 1304400000  |
| 16   | 87.908 | 0         | 58.687 | 2146200000  |
| 1.1  | 86.041 | 0.0087719 | 1.3834 | 3060200000  |
| 20   | 101.07 | 0         | 79.156 | 2774000000  |
| 10.7 | 105.93 | 0         | 21.2   | 623480000   |
| 12.2 | 104.66 | 0         | 43.381 | 808270000   |
| 38.9 | 21.897 | 0         | 40.392 | 712390000   |
| 8.3  | 306.86 | 0         | 113.14 | 2755800000  |
| 1    | 304.27 | 0         | 5.0325 | 238790000   |

|      |        |            |        |             |
|------|--------|------------|--------|-------------|
| 34.4 | 46.325 | 0          | 162.75 | 3156700000  |
| 3.6  | 133.37 | 0          | 13.917 | 240180000   |
| 7    | 74.691 | 0          | 30.964 | 535880000   |
| 5.1  | 81.8   | 0          | 23.87  | 154900000   |
| 30.7 | 90.244 | 0          | 114.92 | 4275500000  |
| 18.7 | 67.839 | 0          | 27.857 | 555820000   |
| 2.9  | 46.13  | 0.00043898 | 3.4168 | 690390000   |
| 10.5 | 32.136 | 0          | 23.277 | 226800000   |
| 10.4 | 7.5938 | 0.0087944  | 1.3966 | 2727200000  |
| 16.9 | 57.685 | 0          | 24.384 | 909840000   |
| 9.3  | 35.955 | 0          | 4.7466 | 139010000   |
| 8.8  | 48.37  | 0          | 14.235 | 409290000   |
| 13.4 | 76.775 | 0          | 39.626 | 1017400000  |
| 2.4  | 134.11 | 0          | 4.6951 | 157340000   |
| 1.7  | 195.81 | 0          | 11.664 | 204430000   |
| 2.7  | 80.169 | 0          | 11.931 | 93452000    |
| 0.9  | 117.02 | 0.0053558  | 1.7276 | 611600000   |
| 9.3  | 109.55 | 0          | 54.287 | 967760000   |
| 13.5 | 61.449 | 0          | 32.288 | 400010000   |
| 28.1 | 28.742 | 0          | 30.688 | 292270000   |
| 1    | 429.36 | 0.0034992  | 1.9438 | 266780000   |
| 23.8 | 47.898 | 0          | 98.386 | 2325600000  |
| 19.6 | 57.922 | 0          | 54.265 | 1060600000  |
| 7.3  | 59.964 | 0          | 31.681 | 702830000   |
| 34   | 21.482 | 0          | 14.658 | 484180000   |
| 7.3  | 52.862 | 0          | 323.31 | 5664200000  |
| 8.3  | 54.628 | 0          | 36.336 | 271730000   |
| 12.6 | 17.919 | 0          | 20.464 | 439010000   |
| 59.3 | 16.241 | 0          | 49.27  | 231480000   |
| 66.1 | 6.6882 | 0          | 36.816 | 197040000   |
| 17.3 | 10.271 | 0          | 5.967  | 82138000    |
| 98.9 | 9.5155 | 0          | 69.41  | 5016700000  |
| 3.4  | 143.2  | 0          | 7.1972 | 111420000   |
| 4.8  | 37.804 | 0          | 4.4849 | 23249000    |
| 6.6  | 32.754 | 0          | 3.5773 | 173110000   |
| 10.7 | 343.81 | 0          | 93.16  | 1383300000  |
| 18.9 | 201.82 | 0          | 290.61 | 9407500000  |
| 30.4 | 404.05 | 0          | 323.31 | 26448000000 |
| 3.5  | 197.09 | 0          | 12.089 | 804000000   |
| 52.1 | 196.58 | 0          | 323.31 | 49509000000 |
| 39.4 | 177.3  | 0          | 323.31 | 24334000000 |

|      |        |            |        |             |
|------|--------|------------|--------|-------------|
| 6.4  | 43.865 | 0          | 8.4082 | 194190000   |
| 6.5  | 45.655 | 0          | 6.7368 | 702770000   |
| 23.6 | 17.749 | 0          | 8.5039 | 205800000   |
| 22   | 9.6418 | 0          | 11.613 | 96251000    |
| 10.9 | 50.777 | 0          | 14.356 | 235750000   |
| 28.5 | 52.75  | 0          | 81.372 | 1229600000  |
| 0.8  | 134.19 | 0.0053537  | 1.7276 | 52072000    |
| 22.1 | 29.994 | 0          | 25.606 | 664140000   |
| 19.5 | 70.148 | 0          | 28.923 | 583410000   |
| 43.7 | 70.75  | 0          | 156.04 | 7437800000  |
| 69   | 36.498 | 0          | 237.49 | 18124000000 |
| 56.6 | 36.572 | 0          | 183.59 | 5056900000  |
| 3.3  | 37.225 | 0.00042553 | 3.08   | 378470000   |
| 12.5 | 57.506 | 0          | 28.954 | 548150000   |
| 4.8  | 81.7   | 0          | 14.264 | 83425000    |
| 30.4 | 82.988 | 0          | 100.86 | 1893000000  |
| 39.1 | 31.627 | 0          | 48.487 | 561530000   |
| 86.7 | 14.866 | 0          | 288.13 | 94709000000 |
| 27.3 | 27.515 | 0          | 18.872 | 999750000   |
| 7.1  | 49.372 | 0          | 12.622 | 247830000   |
| 4.6  | 81.286 | 0          | 3.6418 | 4344200000  |
| 4.6  | 100.67 | 0          | 12.59  | 469380000   |
| 40.6 | 37.24  | 0          | 61.232 | 4535600000  |
| 33.4 | 39.031 | 0          | 48.526 | 2965600000  |
| 8.6  | 45.325 | 0          | 9.4756 | 124330000   |
| 29.9 | 83.347 | 0          | 77.319 | 1749000000  |
| 12.2 | 57.788 | 0          | 42.814 | 1224000000  |
| 11.7 | 40.429 | 0          | 9.4525 | 428040000   |
| 54.2 | 40.996 | 0          | 231.47 | 13155000000 |
| 2.8  | 79.996 | 0          | 5.0375 | 293510000   |
| 62.4 | 74.237 | 0          | 323.31 | 66989000000 |
| 25.9 | 66.785 | 0          | 223.44 | 5925000000  |
| 14.1 | 67.317 | 0          | 39.149 | 1641000000  |
| 29.7 | 66.309 | 0          | 85.106 | 9977100000  |
| 6.1  | 117.3  | 0          | 16.938 | 755070000   |
| 16.6 | 105.84 | 0          | 60.64  | 1283100000  |
| 47.8 | 66.506 | 0          | 277.22 | 30806000000 |
| 6.4  | 83.739 | 0          | 5.299  | 234260000   |
| 3.6  | 53.109 | 0          | 3.5324 | 63271000    |
| 61.8 | 65.89  | 0          | 323.31 | 78388000000 |
| 11.4 | 504.74 | 0          | 156.85 | 7243400000  |



|      |        |            |        |             |
|------|--------|------------|--------|-------------|
| 9.2  | 42.215 | 0          | 12.293 | 685390000   |
| 19   | 156.61 | 0          | 79.098 | 2149600000  |
| 25.1 | 51.851 | 0          | 91.709 | 7338200000  |
| 2.1  | 39.06  | 0.0070475  | 1.4974 | 432270000   |
| 7.8  | 68.075 | 0          | 10.999 | 803510000   |
| 2.7  | 71.991 | 0.0027745  | 2.2276 | 273530000   |
| 29.6 | 34.877 | 0          | 48.694 | 2381500000  |
| 10.2 | 71.302 | 0          | 46.213 | 1017800000  |
| 7.8  | 11.845 | 0.005723   | 1.7164 | 112450000   |
| 20.9 | 9.9374 | 0          | 3.4371 | 92892000    |
| 24.3 | 11.636 | 0          | 30.182 | 418970000   |
| 31.3 | 69.05  | 0          | 148.78 | 4235400000  |
| 21.8 | 153.18 | 0          | 141.67 | 10944000000 |
| 2    | 195.83 | 0.00043478 | 3.3138 | 282010000   |
| 5    | 134.36 | 0          | 8.2802 | 419430000   |
| 40.6 | 171.3  | 0          | 323.31 | 45626000000 |
| 3.4  | 38.611 | 0          | 3.9091 | 34584000    |
| 3.2  | 51.45  | 0          | 53.25  | 271750000   |
| 29.9 | 38.265 | 0          | 319.47 | 1.3182E+11  |
| 17.6 | 25.492 | 0          | 23.982 | 1270500000  |
| 15.7 | 14.377 | 0          | 7.8344 | 257140000   |
| 13.7 | 14.192 | 0          | 4.4497 | 377140000   |
| 63.8 | 23.367 | 0          | 118.96 | 3038800000  |
| 33.3 | 24.794 | 0          | 64.718 | 874990000   |
| 10.5 | 10.391 | 0.00043745 | 3.3863 | 32755000    |
| 19.4 | 31.172 | 0          | 29.174 | 920270000   |
| 1.1  | 831.87 | 0          | 25.172 | 893100000   |
| 30.7 | 35.294 | 0          | 36.916 | 1429500000  |
| 8.1  | 115.69 | 0          | 34.374 | 468550000   |
| 9.5  | 20.373 | 0          | 6.9    | 746460000   |
| 6.5  | 59.601 | 0          | 32.635 | 435530000   |
| 31.9 | 58.557 | 0          | 78.235 | 2659800000  |
| 5.3  | 300.14 | 0          | 43.73  | 1569900000  |
| 12.2 | 270.25 | 0          | 144.08 | 7097600000  |
| 11.6 | 14.272 | 0          | 3.5532 | 515510000   |
| 11.2 | 14.617 | 0          | 5.1098 | 702570000   |
| 2.6  | 102.94 | 0          | 6.5594 | 182910000   |
| 26.7 | 43.474 | 0          | 42.102 | 863170000   |
| 9.9  | 35.836 | 0          | 5.324  | 84738000    |
| 8.1  | 44.113 | 0          | 5.1753 | 170280000   |
| 0.5  | 146.41 | 0.0081061  | 1.4339 | 210140000   |

|      |        |            |        |             |
|------|--------|------------|--------|-------------|
| 23.8 | 113.65 | 0          | 63.902 | 2739400000  |
| 11.4 | 32.803 | 0.00082102 | 2.6628 | 199490000   |
| 41.6 | 41.275 | 0          | 69.159 | 1807200000  |
| 15.5 | 32.327 | 0.00043178 | 3.2317 | 99126000    |
| 22.1 | 43.066 | 0          | 25.034 | 570380000   |
| 10.7 | 36.07  | 0          | 25.529 | 421780000   |
| 5.1  | 101.43 | 0          | 3.9072 | 104380000   |
| 4    | 19.086 | 0.0063934  | 1.5943 | 138720000   |
| 6.6  | 43.688 | 0          | 5.8935 | 97217000    |
| 21.2 | 94.629 | 0          | 295.55 | 2929600000  |
| 52.6 | 17.069 | 0          | 46.722 | 477240000   |
| 5.6  | 25.45  | 0.00042176 | 2.9705 | 32261000    |
| 16.3 | 25.396 | 0          | 15.16  | 501200000   |
| 4.1  | 25.957 | 0.00041754 | 2.845  | 37736000    |
| 3.2  | 36.975 | 0          | 12.885 | 818600000   |
| 4.7  | 53.435 | 0          | 9.0025 | 82986000    |
| 41.5 | 21.502 | 0          | 76.781 | 954490000   |
| 16.2 | 79.343 | 0          | 21.758 | 1020100000  |
| 19.9 | 61.378 | 0          | 78.845 | 941660000   |
| 27   | 19.017 | 0          | 7.5184 | 252140000   |
| 4.8  | 16.168 | 0.0045977  | 1.7376 | 121400000   |
| 57.1 | 2.3277 | 0.0035211  | 2.0199 | 104720000   |
| 37.4 | 27.203 | 0          | 46.761 | 4650800000  |
| 20.4 | 23.901 | 0          | 14.571 | 323200000   |
| 44   | 36.511 | 0          | 156.46 | 10138000000 |
| 63.6 | 35.611 | 0          | 220.34 | 28312000000 |
| 36.6 | 18.582 | 0          | 27.535 | 347110000   |
| 59.3 | 63.953 | 0          | 236.53 | 5307400000  |
| 19.2 | 52.307 | 0          | 13.873 | 1051600000  |
| 56.3 | 40.342 | 0          | 101.17 | 1318600000  |
| 1.1  | 164.72 | 0.0063814  | 1.5754 | 67845000    |
| 20.5 | 33.692 | 0          | 5.2969 | 221190000   |
| 3.6  | 52.921 | 0          | 12.777 | 150970000   |
| 20.8 | 20.578 | 0          | 5.306  | 1033800000  |
| 50.2 | 28.937 | 0          | 164.71 | 48863000000 |
| 30.5 | 18.538 | 0          | 17.545 | 2625600000  |
| 55.4 | 47.169 | 0          | 272.33 | 25578000000 |
| 6    | 68.937 | 0          | 4.097  | 153190000   |
| 23.1 | 12.359 | 0          | 31.032 | 679190000   |
| 40   | 17.551 | 0          | 34.23  | 762150000   |
| 24.8 | 16.958 | 0          | 7.7037 | 185410000   |

|      |        |            |        |             |
|------|--------|------------|--------|-------------|
| 12.1 | 108.69 | 0          | 40.99  | 545220000   |
| 4.3  | 110.07 | 0          | 5.4242 | 531490000   |
| 8.2  | 55.721 | 0          | 3.9843 | 85605000    |
| 71.3 | 12.504 | 0          | 77.053 | 7177400000  |
| 42.1 | 8.5669 | 0          | 47.791 | 820960000   |
| 5.5  | 32.342 | 0          | 3.5043 | 157700000   |
| 9.9  | 45.932 | 0.00042463 | 3.0467 | 86177000    |
| 16   | 14.677 | 0.0067365  | 1.562  | 29163000    |
| 3.4  | 97.458 | 0          | 10.547 | 97491000    |
| 2.4  | 60.235 | 0.0077634  | 1.4743 | 391490000   |
| 5.8  | 91.83  | 0          | 4.5659 | 88478000    |
| 13.8 | 6.6979 | 0.0027734  | 2.2205 | 756410000   |
| 54.1 | 12.454 | 0          | 177.34 | 1417800000  |
| 37   | 14.286 | 0          | 18.685 | 2285000000  |
| 17.8 | 52.227 | 0          | 20.409 | 348910000   |
| 8.4  | 33.097 | 0          | 6.7839 | 184820000   |
| 24.6 | 27.621 | 0          | 34.138 | 2334600000  |
| 10.7 | 164.98 | 0          | 48.707 | 1164600000  |
| 3.9  | 167.07 | 0          | 20.542 | 220740000   |
| 9.6  | 38.522 | 0          | 18.355 | 270830000   |
| 7.6  | 39.41  | 0          | 8.4501 | 281190000   |
| 6    | 21.708 | 0.0080972  | 1.4322 | 134280000   |
| 56.9 | 11.101 | 0          | 26.731 | 1042800000  |
| 6.1  | 93.191 | 0          | 36.735 | 412730000   |
| 42.6 | 67.766 | 0          | 323.31 | 33981000000 |
| 20.7 | 21.55  | 0          | 9.4935 | 253640000   |
| 34.4 | 26.832 | 0          | 21.607 | 1236100000  |
| 47   | 31.062 | 0          | 42.111 | 1946800000  |
| 26.6 | 38.194 | 0          | 25.14  | 719800000   |
| 14.9 | 7.7662 | 0          | 7.6851 | 1789000000  |
| 44.9 | 33.499 | 0          | 152.04 | 5292600000  |
| 44.9 | 25.976 | 0          | 125.57 | 16372000000 |
| 15.6 | 31.726 | 0          | 8.4062 | 247440000   |
| 14.3 | 101.2  | 0          | 28.847 | 915400000   |
| 6.6  | 105.73 | 0          | 17.633 | 216060000   |
| 4.4  | 51.881 | 0          | 5.0315 | 62643000    |
| 5.4  | 68.474 | 0          | 4.955  | 140890000   |
| 2    | 288.79 | 0          | 5.7765 | 123330000   |
| 64.4 | 12.861 | 0          | 60.624 | 4433200000  |
| 9.5  | 35.623 | 0          | 5.7649 | 75017000    |
| 26.6 | 29.758 | 0          | 56.191 | 905030000   |

|      |        |            |        |             |
|------|--------|------------|--------|-------------|
| 19.7 | 165.3  | 0          | 212.05 | 7244200000  |
| 9.4  | 82.843 | 0          | 14.325 | 454600000   |
| 25.2 | 95.923 | 0          | 89.4   | 3174000000  |
| 13.4 | 35.284 | 0          | 37.042 | 579430000   |
| 10.4 | 152.04 | 0          | 68.577 | 916260000   |
| 19.4 | 11.97  | 0          | 5.24   | 166060000   |
| 6    | 28.683 | 0          | 5.5162 | 80750000    |
| 5.3  | 42.722 | 0.00042662 | 3.11   | 103360000   |
| 34.1 | 228.99 | 0          | 323.31 | 31431000000 |
| 0.6  | 227.03 | 0          | 323.31 | 7.6441E+11  |
| 0.6  | 223.26 | 0          | 18.994 | 277080000   |
| 1.3  | 227.76 | 0.00042159 | 2.9685 | 3226100000  |
| 11   | 222.86 | 0          | 323.31 | 4766000000  |
| 29.4 | 226.37 | 0          | 323.31 | 13723000000 |
| 75.5 | 20.594 | 0          | 127.24 | 3569900000  |
| 18   | 19.779 | 0          | 45.918 | 4746400000  |
| 17.9 | 16.93  | 0          | 320.72 | 1.2027E+11  |
| 47.1 | 19.854 | 0          | 323.31 | 52355000000 |
| 12.5 | 113.7  | 0          | 323.31 | 38499000000 |
| 1.9  | 194.04 | 0.00043783 | 3.4032 | 100390000   |
| 2.4  | 118.69 | 0.0031521  | 2.1124 | 87084000    |
| 46.5 | 121.94 | 0          | 323.31 | 29376000000 |
| 15.9 | 116.08 | 0          | 35.299 | 1031100000  |
| 1.4  | 222.44 | 0.0074019  | 1.4809 | 115270000   |
| 14.6 | 233.32 | 0          | 78.299 | 4024100000  |
| 16.3 | 33.471 | 0          | 11.015 | 253290000   |
| 7.7  | 12.374 | 0.0016155  | 2.4559 | 19349000    |
| 19   | 34.995 | 0          | 13.237 | 567200000   |
| 12.2 | 36.595 | 0          | 29.453 | 5712700000  |
| 14.8 | 36.875 | 0          | 37.416 | 480370000   |
| 40.1 | 36.228 | 0          | 12.708 | 867510000   |
| 16.4 | 11.95  | 0          | 34.215 | 267080000   |
| 13.6 | 22.983 | 0          | 5.8996 | 140030000   |
| 1.3  | 100.96 | 0.0004268  | 3.1138 | 58976000    |
| 13.9 | 82.8   | 0          | 19.371 | 798160000   |
| 19.1 | 23.384 | 0          | 23.727 | 634210000   |
| 3.7  | 60.273 | 0          | 6.1254 | 117930000   |
| 14.7 | 47.234 | 0          | 27.059 | 496770000   |
| 20.8 | 55.446 | 0          | 24.484 | 750800000   |
| 14.8 | 45.345 | 0          | 18.611 | 1315400000  |
| 24   | 42.679 | 0          | 42.475 | 993030000   |

|      |        |            |        |            |
|------|--------|------------|--------|------------|
| 13.6 | 33.189 | 0          | 13.477 | 555000000  |
| 9.9  | 58.265 | 0          | 9.839  | 220340000  |
| 5.4  | 64.279 | 0          | 18.008 | 389840000  |
| 10.4 | 22.245 | 0          | 6.5691 | 139890000  |
| 12.1 | 80.405 | 0          | 29.927 | 1566500000 |
| 6.9  | 45.739 | 0.0016207  | 2.5108 | 203850000  |
| 17.2 | 118.52 | 0          | 44.989 | 882860000  |
| 13.7 | 76.722 | 0          | 97.494 | 3040400000 |
| 3.7  | 62.907 | 0          | 9.3234 | 173150000  |
| 31.5 | 43.008 | 0          | 76.691 | 1787100000 |
| 51.3 | 39.28  | 0          | 155.07 | 3915500000 |
| 14.3 | 8.1384 | 0.00042772 | 3.1432 | 94808000   |
| 51.5 | 40.603 | 0          | 72.178 | 3424000000 |
| 24.1 | 14.982 | 0          | 4.8396 | 163190000  |
| 52.4 | 17.086 | 0          | 25.608 | 1069100000 |
| 23.6 | 16.859 | 0          | 11.055 | 886490000  |
| 25.3 | 10.916 | 0          | 7.0944 | 234200000  |
| 50   | 9.3308 | 0          | 7.2953 | 607400000  |
| 68.3 | 9.3267 | 0          | 28.156 | 2915200000 |
| 50.9 | 13.36  | 0          | 12.681 | 303280000  |
| 33.6 | 15.283 | 0          | 15.786 | 855870000  |
| 57   | 19.992 | 0          | 56.41  | 2344600000 |
| 48.5 | 42.525 | 0          | 82.792 | 2166200000 |
| 8.1  | 20.082 | 0          | 9.7874 | 90473000   |
| 6.5  | 42.524 | 0          | 3.7244 | 28264000   |
| 47.4 | 6.954  | 0          | 18.081 | 1407100000 |
| 30.1 | 21.024 | 0          | 53.093 | 1004800000 |
| 33.7 | 11.692 | 0          | 7.2229 | 362050000  |
| 38.8 | 15.081 | 0          | 30.525 | 803790000  |
| 16.9 | 21.71  | 0          | 7.9939 | 210470000  |
| 32   | 15.515 | 0          | 7.1233 | 238260000  |
| 14.6 | 16.331 | 0          | 9.7686 | 427680000  |
| 31.3 | 21.984 | 0          | 14.752 | 943290000  |
| 50.8 | 14.164 | 0          | 57.679 | 1129400000 |
| 45.9 | 79.776 | 0          | 171.34 | 4432900000 |
| 24.8 | 52.625 | 0          | 69.062 | 3000000000 |
| 42.6 | 30.149 | 0          | 65.742 | 1815500000 |
| 29.7 | 19.784 | 0          | 21.527 | 783270000  |
| 41.5 | 12.648 | 0          | 27.959 | 1062700000 |
| 60.3 | 13.02  | 0          | 26.351 | 493340000  |
| 26.8 | 24.683 | 0          | 30.707 | 775130000  |

|      |        |            |        |             |
|------|--------|------------|--------|-------------|
| 17.9 | 24.038 | 0          | 27.041 | 1505700000  |
| 39.7 | 50.834 | 0          | 65.787 | 3118900000  |
| 27.4 | 27.285 | 0          | 26.196 | 863460000   |
| 27.9 | 11.813 | 0.0070423  | 1.4943 | 57891000    |
| 25.6 | 31.113 | 0          | 22.704 | 339550000   |
| 16.2 | 102.71 | 0          | 71.412 | 2849000000  |
| 17.3 | 8.9723 | 0          | 9.5619 | 912830000   |
| 13.7 | 95.915 | 0          | 71.902 | 268290000   |
| 1.7  | 66.275 | 0.0042487  | 1.8597 | 2600100000  |
| 4.1  | 201.77 | 0          | 24.355 | 318440000   |
| 1.6  | 72.107 | 0          | 4.6751 | 250700000   |
| 2.6  | 47.471 | 0.0035294  | 2.0459 | 68944000    |
| 6.5  | 47.775 | 0          | 13.191 | 104810000   |
| 12.8 | 44.637 | 0          | 21.283 | 295290000   |
| 9.4  | 28.567 | 0.00042608 | 3.1009 | 193220000   |
| 12.1 | 71.415 | 0          | 19.523 | 219440000   |
| 50   | 14.173 | 0          | 23.827 | 515480000   |
| 32.5 | 136.54 | 0          | 214.84 | 10405000000 |
| 12.2 | 153.91 | 0          | 77.896 | 2327700000  |
| 8    | 41.745 | 0          | 9.8897 | 157190000   |
| 13.2 | 16.555 | 0          | 21.747 | 356660000   |
| 32.4 | 31.886 | 0          | 25.085 | 732880000   |
| 33.3 | 30.501 | 0          | 52.336 | 70507000000 |
| 8.6  | 107.83 | 0          | 16.752 | 236710000   |
| 35.5 | 17.208 | 0          | 19.433 | 739640000   |
| 42.8 | 17.363 | 0          | 100.64 | 11413000000 |
| 23.1 | 19.099 | 0          | 5.5375 | 57244000    |
| 10   | 34.376 | 0          | 9.8887 | 106640000   |
| 11.3 | 56.888 | 0          | 18.758 | 632670000   |
| 28.4 | 113.84 | 0          | 105.42 | 4012400000  |
| 25.8 | 54.54  | 0          | 131.97 | 1571700000  |
| 12.3 | 60.342 | 0          | 16.113 | 251650000   |
| 20.1 | 38.928 | 0          | 21.44  | 718980000   |
| 6.1  | 55.939 | 0          | 27.324 | 375550000   |
| 23.2 | 103.32 | 0          | 87.712 | 1948200000  |
| 29.8 | 32.56  | 0          | 78.436 | 2034500000  |
| 3.4  | 67.061 | 0          | 198.52 | 18017000000 |
| 2.5  | 64.944 | 0          | 28.95  | 453550000   |
| 17.7 | 30.821 | 0          | 13.71  | 1480800000  |
| 31   | 30.959 | 0          | 42.262 | 924710000   |
| 18.2 | 26.248 | 0          | 11.963 | 422280000   |

|      |        |            |        |             |
|------|--------|------------|--------|-------------|
| 15.9 | 82.613 | 0          | 37.691 | 803290000   |
| 15.4 | 40.709 | 0          | 26.353 | 459850000   |
| 36.5 | 23.076 | 0          | 119.43 | 1301600000  |
| 6.2  | 63.864 | 0          | 5.7513 | 210410000   |
| 16.6 | 67.81  | 0          | 24.582 | 1391200000  |
| 16.6 | 53.408 | 0          | 25.642 | 734550000   |
| 6    | 50.304 | 0          | 4.8178 | 162780000   |
| 9    | 38.358 | 0          | 11.593 | 636610000   |
| 9.1  | 18.593 | 0.0057186  | 1.7105 | 145150000   |
| 12.3 | 21.825 | 0          | 3.5897 | 159030000   |
| 5    | 35.693 | 0          | 8.9773 | 46732000    |
| 33.5 | 26.24  | 0          | 15.011 | 630740000   |
| 2.2  | 35.197 | 0.0053476  | 1.725  | 660610000   |
| 5.8  | 18.648 | 0.00042391 | 3.0135 | 23457000    |
| 5.6  | 235.63 | 0          | 8.5613 | 343860000   |
| 4.6  | 128.62 | 0          | 5.6426 | 190920000   |
| 3.6  | 155.12 | 0          | 11.187 | 107750000   |
| 2.1  | 94.529 | 0          | 4.9092 | 34214000    |
| 9.5  | 93.28  | 0          | 13.388 | 168480000   |
| 70.9 | 14.478 | 0          | 133.79 | 3131600000  |
| 0.9  | 203.07 | 0.0060675  | 1.6698 | 977790000   |
| 64.7 | 48.354 | 0          | 180.85 | 7200600000  |
| 22.2 | 20.848 | 0          | 7.4642 | 139020000   |
| 52.9 | 116.45 | 0          | 323.31 | 24421000000 |
| 43   | 34.012 | 0          | 323.31 | 1.3698E+11  |
| 27.5 | 44.729 | 0          | 45.782 | 2347100000  |
| 4    | 49.745 | 0.0077691  | 1.4775 | 2584500000  |
| 20   | 111.34 | 0          | 75.463 | 1502000000  |
| 11.6 | 23.895 | 0          | 7.6609 | 289420000   |
| 8    | 61.67  | 0          | 34.802 | 472040000   |
| 4.9  | 83.628 | 0.00043516 | 3.3181 | 65219000    |
| 5.1  | 96.965 | 0          | 18.455 | 309320000   |
| 3.1  | 71.527 | 0          | 5.6757 | 125070000   |
| 8.1  | 16.815 | 0          | 3.7166 | 595770000   |
| 29.3 | 23.782 | 0          | 22.857 | 1264100000  |
| 28   | 31.27  | 0          | 40.722 | 2014200000  |
| 59   | 55.988 | 0          | 323.31 | 11647000000 |
| 5.1  | 58.213 | 0          | 7.8291 | 382380000   |
| 49.3 | 57.058 | 0          | 255.32 | 12200000000 |
| 19.7 | 37.971 | 0          | 14.284 | 731850000   |
| 20.3 | 70.67  | 0          | 39.645 | 2425100000  |

|      |        |           |        |             |
|------|--------|-----------|--------|-------------|
| 5.5  | 31.044 | 0         | 7.6269 | 163710000   |
| 10.3 | 55.832 | 0         | 32.2   | 1300300000  |
| 16.8 | 46.67  | 0         | 13.267 | 405330000   |
| 31.4 | 25.581 | 0         | 54.457 | 1709900000  |
| 20   | 47.006 | 0         | 20.496 | 640640000   |
| 19.8 | 57.93  | 0         | 15.805 | 868510000   |
| 2.6  | 41.614 | 0.0035405 | 2.0819 | 189730000   |
| 3.2  | 55.446 | 0.0064127 | 1.6149 | 84178000    |
| 4.1  | 138.9  | 0         | 9.4414 | 257560000   |
| 10.5 | 70.35  | 0         | 10.901 | 232810000   |
| 84.1 | 20.021 | 0         | 228.22 | 14904000000 |
| 3.9  | 79.916 | 0         | 13.451 | 85397000    |
| 17.6 | 59.452 | 0         | 29.369 | 790510000   |
| 42.7 | 42.329 | 0         | 99.888 | 6954700000  |
| 9.3  | 41.669 | 0         | 15.949 | 103280000   |
| 27   | 30.944 | 0         | 74.527 | 2045100000  |
| 1.2  | 183.66 | 0.003528  | 2.045  | 28103000    |
| 20.6 | 81.163 | 0         | 138.92 | 2436800000  |
| 25.1 | 129.68 | 0         | 167.15 | 6119000000  |
| 42.7 | 37.497 | 0         | 110.89 | 5588300000  |
| 22.4 | 34.917 | 0         | 27.795 | 1746900000  |
| 19.3 | 79.921 | 0         | 60.624 | 953710000   |
| 27.9 | 58.408 | 0         | 55.298 | 1351700000  |
| 29.2 | 70.527 | 0         | 65.233 | 1173000000  |
| 61.2 | 24.634 | 0         | 110.01 | 2066200000  |
| 11.5 | 56.494 | 0         | 18.915 | 380920000   |
| 5.1  | 54.874 | 0         | 9.6084 | 151790000   |
| 6.5  | 41.666 | 0         | 4.6546 | 47956000    |
| 23.1 | 24.715 | 0         | 16.604 | 647220000   |
| 37.3 | 14.275 | 0         | 41.401 | 877840000   |
| 55.6 | 21.663 | 0         | 39.067 | 2311500000  |
| 37.9 | 96.023 | 0         | 171.74 | 5475100000  |
| 15.5 | 23.277 | 0         | 6.8154 | 110690000   |
| 10.3 | 124.51 | 0         | 64.268 | 1157200000  |
| 2.4  | 98.406 | 0         | 8.5355 | 219720000   |
| 8.7  | 122.8  | 0         | 14.335 | 599000000   |
| 50.5 | 43.231 | 0         | 192.57 | 5102400000  |
| 64.6 | 38.937 | 0         | 137.86 | 7622500000  |
| 8.4  | 53.998 | 0         | 7.7257 | 220620000   |
| 54.5 | 56.678 | 0         | 323.31 | 27091000000 |
| 25.1 | 71.982 | 0         | 61.893 | 2465000000  |



|      |        |            |        |             |
|------|--------|------------|--------|-------------|
| 10.8 | 59.266 | 0          | 9.6797 | 220090000   |
| 29.3 | 48.1   | 0          | 107.8  | 3623300000  |
| 11.3 | 46.04  | 0          | 12.221 | 120140000   |
| 6.7  | 47.922 | 0          | 6.5476 | 793460000   |
| 83.5 | 35.774 | 0          | 323.31 | 21163000000 |
| 80.4 | 34.299 | 0          | 315.54 | 9836600000  |
| 45.5 | 35.556 | 0          | 114.1  | 2918800000  |
| 1.7  | 61.18  | 0.00082372 | 2.7182 | 80962000    |
| 3.2  | 150.33 | 0.00043141 | 3.2149 | 61518000    |
| 3.7  | 164.42 | 0          | 8.7775 | 401390000   |
| 4.9  | 78.542 | 0.000819   | 2.6129 | 130500000   |
| 38.8 | 35.015 | 0          | 38.956 | 1144300000  |
| 36.9 | 15.054 | 0          | 17.86  | 1028000000  |
| 89.3 | 20.83  | 0          | 189.7  | 16940000000 |
| 11.3 | 69.823 | 0          | 11.371 | 535620000   |
| 2    | 55.028 | 0.00043159 | 3.2235 | 124320000   |
| 14.5 | 22.774 | 0          | 8.0629 | 109880000   |
| 2.2  | 66.805 | 0          | 4.1485 | 32469000    |
| 28.6 | 11.243 | 0          | 17.785 | 1585800000  |
| 16.9 | 16.534 | 0          | 26.816 | 374120000   |
| 33.1 | 17.356 | 0          | 32.987 | 387740000   |
| 26.8 | 14.454 | 0.0023847  | 2.2503 | 226960000   |
| 21   | 85.359 | 0          | 64.785 | 1593300000  |
| 19.1 | 85.268 | 0          | 64.533 | 1627100000  |
| 22.2 | 85.454 | 0          | 221.12 | 4594600000  |
| 63.4 | 28.832 | 0          | 157.17 | 11830000000 |
| 53.2 | 53.247 | 0          | 107.51 | 3751800000  |
| 65.9 | 44.55  | 0          | 235.17 | 12683000000 |
| 83.7 | 27.254 | 0          | 173.37 | 7195300000  |
| 42   | 61.417 | 0          | 138.01 | 6443600000  |
| 2.9  | 68.747 | 0.00043048 | 3.1931 | 89233000    |
| 7.7  | 59.452 | 0          | 7.3891 | 154390000   |
| 63.5 | 62.219 | 0          | 323.31 | 48992000000 |
| 18.1 | 34.54  | 0          | 11.813 | 697340000   |
| 36.4 | 21.694 | 0          | 31.59  | 2166300000  |
| 6.5  | 23.334 | 0          | 6.277  | 339810000   |
| 64   | 29.82  | 0          | 144.81 | 5776000000  |
| 32.8 | 33.296 | 0          | 46.794 | 2406300000  |
| 4.7  | 56.585 | 0          | 5.5411 | 71166000    |
| 4.5  | 32.517 | 0.0070579  | 1.5047 | 51149000    |
| 51.9 | 29.15  | 0          | 49.877 | 2475600000  |

|      |        |            |        |             |
|------|--------|------------|--------|-------------|
| 2.5  | 237.04 | 0          | 21.882 | 317550000   |
| 31.3 | 64.647 | 0          | 156.28 | 4082400000  |
| 7.9  | 61.71  | 0          | 6.9077 | 123110000   |
| 9.1  | 18.37  | 0          | 6.4238 | 233560000   |
| 2.2  | 46.151 | 0.0067416  | 1.5654 | 33659000    |
| 4.1  | 32.066 | 0.0023828  | 2.2401 | 51076000    |
| 18.8 | 31.893 | 0          | 42.574 | 1000100000  |
| 8.5  | 31.487 | 0          | 5.6513 | 191680000   |
| 9.2  | 112.84 | 0          | 14.869 | 566130000   |
| 9.4  | 57.844 | 0          | 323.31 | 69451000000 |
| 8.3  | 57.984 | 0          | 37.514 | 7114700000  |
| 2.1  | 104.41 | 0.00042735 | 3.128  | 85396000    |
| 10.4 | 85.221 | 0          | 54.811 | 623750000   |
| 3.3  | 133.33 | 0.00042265 | 2.9869 | 141260000   |
| 7    | 139.49 | 0          | 30.797 | 419720000   |
| 42.3 | 85.872 | 0          | 125.82 | 4715000000  |
| 18.9 | 533.5  | 0          | 323.31 | 12567000000 |
| 29.1 | 90.807 | 0          | 74.004 | 2763500000  |
| 54.9 | 55.595 | 0          | 271.12 | 8166300000  |
| 29.5 | 47.262 | 0          | 88.425 | 1930300000  |
| 48.3 | 139.41 | 0          | 282.98 | 8999300000  |
| 17.8 | 16.607 | 0.00042827 | 3.1526 | 401440000   |
| 61.3 | 70.741 | 0          | 323.31 | 30431000000 |
| 4.4  | 31.802 | 0          | 3.5141 | 170710000   |
| 2.3  | 59.616 | 0.00043917 | 3.4198 | 115410000   |
| 4.1  | 206.23 | 0          | 16.481 | 311640000   |
| 1.5  | 93.262 | 0.00043937 | 3.4261 | 90746000    |
| 10.9 | 58.278 | 0          | 25.934 | 836080000   |
| 1.5  | 82.435 | 0          | 4.7599 | 90448000    |
| 31.8 | 32.277 | 0          | 40.226 | 1302600000  |
| 23.6 | 68.717 | 0          | 23.464 | 793460000   |
| 6.8  | 49.429 | 0          | 5.35   | 137710000   |
| 6.9  | 46.379 | 0          | 11.802 | 146710000   |
| 8    | 17.143 | 0          | 3.6275 | 184740000   |
| 16.1 | 39.565 | 0          | 7.726  | 107020000   |
| 39.3 | 39.351 | 0          | 60.972 | 2323300000  |
| 27.6 | 77.043 | 0          | 52.977 | 2396400000  |
| 1.7  | 87.098 | 0.00042499 | 3.0598 | 978170000   |
| 26   | 32.667 | 0          | 38.081 | 1359200000  |
| 28.5 | 38.114 | 0          | 18.452 | 746290000   |
| 74.4 | 17.971 | 0          | 309.55 | 85419000000 |

|      |        |            |        |             |
|------|--------|------------|--------|-------------|
| 43.5 | 23.713 | 0          | 61.234 | 5868300000  |
| 19.7 | 40.742 | 0          | 15.473 | 648060000   |
| 1.1  | 204    | 0          | 5.2147 | 228380000   |
| 5.1  | 42.888 | 0.00042248 | 2.9835 | 98181000    |
| 11.9 | 42.256 | 0          | 11.175 | 364130000   |
| 11.5 | 37.54  | 0          | 11.612 | 475650000   |
| 40.7 | 37.186 | 0          | 259.9  | 12795000000 |
| 4.3  | 36.983 | 0          | 6.3919 | 82346000    |
| 20.1 | 111.81 | 0          | 150.28 | 9416000000  |
| 2.4  | 109.05 | 0          | 11.159 | 488510000   |
| 7.3  | 84.684 | 0          | 19.555 | 310680000   |
| 36.7 | 16.649 | 0          | 59.125 | 4231400000  |
| 28.3 | 41.291 | 0          | 59.983 | 1174300000  |
| 32.7 | 35.608 | 0          | 53.639 | 1830500000  |
| 34.8 | 65.322 | 0          | 219.46 | 10591000000 |
| 11.9 | 51.691 | 0          | 35.226 | 717800000   |
| 50.8 | 36.71  | 0          | 54.082 | 2058500000  |
| 7.8  | 56.346 | 0          | 8.4112 | 158380000   |
| 12.6 | 52.817 | 0          | 18.379 | 382640000   |
| 4.3  | 35.159 | 0.002004   | 2.3458 | 101350000   |
| 2.8  | 56.752 | 0          | 4.0598 | 26807000    |
| 22.2 | 34.49  | 0          | 34.706 | 684690000   |
| 16.9 | 19.478 | 0          | 7.3057 | 298080000   |
| 62.3 | 22.176 | 0          | 126.06 | 20435000000 |
| 78.3 | 21.778 | 0          | 128.55 | 7452700000  |
| 38.1 | 28.127 | 0          | 41.218 | 2210800000  |
| 38.7 | 31.052 | 0          | 52.991 | 3196600000  |
| 74.7 | 17.015 | 0          | 135.57 | 9311100000  |
| 62.9 | 24.87  | 0          | 303.85 | 10994000000 |
| 48.1 | 43.292 | 0          | 323.31 | 1.0067E+11  |
| 9.4  | 80.751 | 0          | 19.059 | 347460000   |
| 14.7 | 63.928 | 0          | 15.152 | 426710000   |
| 7.6  | 39.802 | 0          | 9.6618 | 477640000   |
| 5.8  | 37.52  | 0          | 28.624 | 600340000   |
| 22   | 43.185 | 0          | 31.737 | 976600000   |
| 10.2 | 45.389 | 0          | 33.394 | 418340000   |
| 18   | 46.167 | 0          | 55.874 | 656720000   |
| 5.7  | 76.851 | 0          | 13.748 | 79315000    |
| 8.5  | 77.546 | 0          | 18.485 | 366670000   |
| 43.1 | 27.853 | 0          | 114.51 | 12795000000 |
| 5.8  | 58.792 | 0          | 19.846 | 361230000   |

|      |        |            |        |            |
|------|--------|------------|--------|------------|
| 20   | 77.789 | 0          | 66.347 | 1391600000 |
| 6.1  | 34.371 | 0          | 5.8702 | 68205000   |
| 1.7  | 51.818 | 0.0038745  | 1.899  | 21736000   |
| 7    | 27.189 | 0          | 8.6676 | 195100000  |
| 28.1 | 30.048 | 0          | 35.878 | 758910000  |
| 13.1 | 55.238 | 0          | 20.406 | 454600000  |
| 26.9 | 52.686 | 0          | 91.708 | 731740000  |
| 14.5 | 34.834 | 0          | 27.638 | 577740000  |
| 19.9 | 39.431 | 0          | 25.154 | 429220000  |
| 27.8 | 61.422 | 0          | 30.89  | 2195600000 |
| 47.1 | 29.546 | 0          | 99.351 | 3186400000 |
| 43.6 | 25.926 | 0          | 45.816 | 1967200000 |
| 12.9 | 28.405 | 0          | 6.8405 | 1078000000 |
| 41.1 | 26.411 | 0          | 80.64  | 2031100000 |
| 30.1 | 27.372 | 0          | 23.282 | 1536200000 |
| 35.5 | 27.855 | 0          | 30.045 | 1901900000 |
| 36.7 | 26.372 | 0          | 76.256 | 3271100000 |
| 53.7 | 22.906 | 0          | 63.027 | 2473500000 |
| 35.6 | 22.965 | 0          | 17.458 | 777680000  |
| 27.3 | 29.116 | 0          | 14.993 | 493570000  |
| 22.7 | 28.532 | 0          | 28.096 | 264070000  |
| 25.6 | 25.378 | 0          | 11.481 | 686120000  |
| 21.3 | 29.891 | 0          | 9.1907 | 472660000  |
| 21.2 | 48.647 | 0          | 18.385 | 1181400000 |
| 26.7 | 49.548 | 0          | 82.727 | 1915900000 |
| 33   | 45.626 | 0          | 57.674 | 1157000000 |
| 41.9 | 44.172 | 0          | 40.737 | 1350800000 |
| 23.3 | 105.73 | 0          | 49.369 | 1670200000 |
| 39.8 | 47.436 | 0          | 43.664 | 1991000000 |
| 14   | 52.895 | 0          | 14.579 | 836550000  |
| 29.8 | 42.809 | 0          | 35.65  | 791470000  |
| 24.8 | 34.577 | 0          | 70.878 | 1260500000 |
| 11.1 | 60.718 | 0          | 28.475 | 408880000  |
| 12   | 40.703 | 0          | 12.742 | 451520000  |
| 23.2 | 55.971 | 0          | 28.086 | 1129200000 |
| 6.2  | 45.536 | 0          | 8.2363 | 258150000  |
| 41.1 | 36.539 | 0          | 53.043 | 1792700000 |
| 13.9 | 39.93  | 0          | 12.092 | 519830000  |
| 17.1 | 24.72  | 0          | 19.058 | 377900000  |
| 45.8 | 28.673 | 0          | 92.066 | 4072500000 |
| 3.5  | 33.104 | 0.00043725 | 3.3725 | 36099000   |

|      |        |            |        |             |
|------|--------|------------|--------|-------------|
| 52.4 | 56.477 | 0          | 225.62 | 6705500000  |
| 9.4  | 57.488 | 0.0070632  | 1.512  | 90707000    |
| 2.3  | 77.795 | 0          | 7.4684 | 75206000    |
| 9.6  | 28.617 | 0          | 4.5498 | 143960000   |
| 25   | 43.323 | 0          | 31.806 | 532450000   |
| 30.6 | 18.721 | 0          | 14.036 | 1925500000  |
| 2.6  | 98.72  | 0.0035156  | 2.0083 | 68482000    |
| 59.1 | 57.046 | 0          | 323.31 | 37593000000 |
| 7    | 35.56  | 0          | 8.254  | 175620000   |
| 22.5 | 34.449 | 0          | 11.426 | 334650000   |
| 7.6  | 69.042 | 0          | 10.97  | 952890000   |
| 10.9 | 11.43  | 0          | 3.4349 | 353580000   |
| 26.3 | 19.127 | 0          | 10.379 | 221160000   |
| 23.1 | 68.034 | 0          | 34.085 | 508300000   |
| 2    | 184.96 | 0          | 7.2781 | 82457000    |
| 1.8  | 130.85 | 0          | 5.4691 | 13312000    |
| 19.9 | 19.526 | 0          | 12.771 | 399260000   |
| 6.2  | 54.028 | 0.00041946 | 2.9129 | 244040000   |
| 12.1 | 34.883 | 0          | 57.301 | 1038100000  |
| 5.2  | 165.1  | 0          | 14.652 | 219430000   |
| 18.9 | 60.811 | 0          | 71.062 | 1421500000  |
| 32.3 | 96.729 | 0          | 168.53 | 8251600000  |
| 16.6 | 97.462 | 0          | 145.49 | 846310000   |
| 39.8 | 97.285 | 0          | 215.34 | 9313900000  |
| 25.9 | 87.676 | 0          | 83.115 | 2030700000  |
| 39.8 | 25.57  | 0          | 24.606 | 1686800000  |
| 50.4 | 13.373 | 0          | 22.137 | 827780000   |
| 10.7 | 35.226 | 0          | 3.4799 | 111530000   |
| 14   | 22.541 | 0          | 7.4031 | 1498600000  |
| 37.6 | 24.489 | 0          | 86.529 | 1493600000  |
| 3.7  | 27.328 | 0.00041597 | 2.8139 | 105080000   |
| 47.9 | 23.897 | 0          | 36.507 | 1900400000  |
| 22.8 | 23.035 | 0          | 11.953 | 388830000   |
| 32.7 | 22.677 | 0          | 45.53  | 2513500000  |
| 21.4 | 22.187 | 0          | 18.197 | 631420000   |
| 22.1 | 24.106 | 0          | 17.466 | 1113100000  |
| 5    | 24.56  | 0          | 3.6087 | 81549000    |
| 37.3 | 23.547 | 0          | 16.094 | 546620000   |
| 6.2  | 29.1   | 0.00042918 | 3.1654 | 165840000   |
| 9    | 23.025 | 0          | 127.86 | 704370000   |
| 21.9 | 23.598 | 0          | 14.942 | 321810000   |

|      |        |            |        |            |
|------|--------|------------|--------|------------|
| 21.9 | 23.707 | 0          | 41.825 | 2132100000 |
| 21.8 | 23.412 | 0          | 34.501 | 772530000  |
| 20.2 | 23.461 | 0          | 11.643 | 554410000  |
| 56.5 | 23.489 | 0          | 86.812 | 1766700000 |
| 6.8  | 23.668 | 0          | 9.5674 | 217980000  |
| 6.8  | 23.603 | 0.00043764 | 3.3944 | 112920000  |
| 21.4 | 21.45  | 0          | 51.781 | 8934600000 |
| 17.5 | 43.512 | 0          | 26.29  | 816580000  |
| 10.7 | 23.553 | 0          | 3.4492 | 678020000  |
| 4.1  | 31.198 | 0.0012235  | 2.5706 | 120160000  |
| 21.7 | 23.596 | 0          | 32.863 | 1445800000 |
| 1.6  | 341.12 | 0          | 17.142 | 263790000  |
| 1.7  | 63.53  | 0.00081967 | 2.6538 | 27378000   |
| 15.2 | 20.987 | 0          | 15.535 | 1247800000 |
| 29.9 | 20.825 | 0          | 198.18 | 8528900000 |
| 6.6  | 20.745 | 0.0023876  | 2.2632 | 22042000   |
| 17.9 | 18.349 | 0          | 11.506 | 580880000  |
| 24.1 | 75.673 | 0          | 43.996 | 2154800000 |
| 2.1  | 79.381 | 0          | 7.8069 | 64452000   |
| 10.1 | 47.655 | 0          | 20.175 | 672380000  |
| 10.1 | 47.789 | 0.0060813  | 1.6824 | 160590000  |
| 67.7 | 20.911 | 0          | 45.619 | 4785500000 |
| 3.9  | 69.448 | 0          | 5.1052 | 36243000   |
| 1.5  | 106.08 | 0.0094925  | 1.373  | 218350000  |
| 4.8  | 99.551 | 0.00043497 | 3.3146 | 316360000  |
| 32.7 | 16.604 | 0          | 54.923 | 1700100000 |
| 14.7 | 58.683 | 0          | 13.552 | 255810000  |
| 7.7  | 42.161 | 0          | 5.2376 | 205550000  |
| 80   | 15.846 | 0          | 107.88 | 8040500000 |
| 10   | 23.206 | 0          | 6.0923 | 153690000  |
| 28.4 | 21.816 | 0          | 52.4   | 2350900000 |
| 6.8  | 22.462 | 0.0042471  | 1.8529 | 179860000  |
| 1.9  | 44.93  | 0.0023904  | 2.2756 | 66662000   |
| 7.5  | 37.27  | 0          | 15.689 | 162430000  |
| 22   | 38.001 | 0          | 58.708 | 1185200000 |
| 15.8 | 35.147 | 0          | 6.6248 | 198450000  |
| 9.6  | 36.365 | 0          | 7.325  | 94860000   |
| 13.6 | 68.542 | 0          | 20.18  | 290660000  |
| 16.2 | 21.05  | 0          | 14.491 | 619720000  |
| 7.6  | 26.738 | 0          | 13.142 | 172730000  |
| 6.8  | 27.61  | 0.0067214  | 1.5468 | 451080000  |

|      |        |            |        |             |
|------|--------|------------|--------|-------------|
| 18.7 | 21.782 | 0          | 90.048 | 10011000000 |
| 7.7  | 22.123 | 0.0012205  | 2.5426 | 238460000   |
| 12.4 | 22.006 | 0          | 3.7044 | 603280000   |
| 6.8  | 22.645 | 0.0063742  | 1.5716 | 11630000    |
| 8.4  | 47.323 | 0          | 27.713 | 328670000   |
| 5.9  | 35     | 0          | 5.5579 | 176040000   |
| 8.3  | 52.028 | 0          | 36.994 | 314060000   |
| 71.9 | 49.816 | 0          | 238.26 | 5247100000  |
| 20.6 | 72.415 | 0          | 50.559 | 1009500000  |
| 12   | 158.04 | 0          | 64.51  | 2562600000  |
| 5.3  | 160.58 | 0          | 38.843 | 442050000   |
| 8.3  | 24.945 | 0          | 10.716 | 161680000   |
| 42.5 | 24.604 | 0          | 57.628 | 2457500000  |
| 33.2 | 24.916 | 0          | 34.403 | 2336800000  |
| 12.9 | 20.252 | 0          | 14.959 | 505040000   |
| 35.8 | 17.804 | 0          | 67.3   | 2161700000  |
| 28.4 | 24.305 | 0          | 40.299 | 4054300000  |
| 8.4  | 23.464 | 0          | 3.7612 | 953420000   |
| 25.8 | 23.564 | 0          | 20.086 | 2125900000  |
| 34.3 | 24.146 | 0          | 27.33  | 2055300000  |
| 28.3 | 21.423 | 0          | 42.788 | 2911100000  |
| 26.1 | 21.644 | 0          | 16.341 | 978470000   |
| 15.3 | 20.732 | 0          | 6.3617 | 405920000   |
| 21.4 | 23.466 | 0          | 14.12  | 336650000   |
| 33.1 | 18.562 | 0          | 24.092 | 1049100000  |
| 39.1 | 14.759 | 0          | 35.447 | 935820000   |
| 27.1 | 14.865 | 0          | 13.058 | 1958400000  |
| 27.6 | 17.695 | 0          | 13.913 | 929870000   |
| 29.9 | 17.779 | 0          | 14.413 | 2313500000  |
| 18.6 | 17.258 | 0          | 4.8057 | 802320000   |
| 20.6 | 15.798 | 0          | 7.3562 | 681680000   |
| 27.7 | 16.605 | 0          | 15.655 | 1967000000  |
| 12.4 | 15.733 | 0          | 4.8082 | 513950000   |
| 23.1 | 46.109 | 0          | 46.167 | 2822000000  |
| 24.3 | 12.784 | 0          | 21.046 | 455030000   |
| 11.2 | 14.463 | 0          | 3.8687 | 1732000000  |
| 39.3 | 15.86  | 0          | 16.067 | 1173800000  |
| 20.5 | 13.293 | 0          | 3.7996 | 643970000   |
| 8.1  | 14.552 | 0          | 7.7336 | 429360000   |
| 7.3  | 12.554 | 0.00082474 | 2.731  | 510270000   |
| 11.4 | 12.215 | 0          | 4.9944 | 700870000   |

|      |        |          |        |            |
|------|--------|----------|--------|------------|
| 41.3 | 10.275 | 0        | 9.9858 | 296240000  |
| 51.4 | 8.2038 | 0        | 9.969  | 353410000  |
| 19.6 | 6.4066 | 0        | 8.0745 | 871390000  |
| 42.7 | 47.153 | 0        | 93.495 | 9596700000 |
| 32.3 | 34.4   | 0        | 28.036 | 1980000000 |
| 30.4 | 33.509 | 0        | 26.006 | 2460500000 |
| 40.4 | 31.419 | 0        | 34.89  | 2752600000 |
| 46.2 | 29.976 | 0        | 50.112 | 3394900000 |
| 35.4 | 28.024 | 0        | 55.2   | 2025800000 |
| 36.5 | 21.881 | 0        | 22.577 | 719730000  |
| 53.9 | 34.216 | 0        | 82.425 | 4088400000 |
| 79.8 | 11.475 | 0        | 145.93 | 5992100000 |
| 76.5 | 11.651 | 0        | 93.172 | 4188600000 |
| 42.3 | 68.527 | 0        | 148.9  | 4756000000 |
| 28.7 | 69.062 | 0        | 298.1  | 5500700000 |
| 42.4 | 18.916 | 0        | 23.217 | 1270800000 |
| 24.1 | 18.431 | 0        | 7.3852 | 830790000  |
| 59.1 | 14.525 | 0        | 46.167 | 1375000000 |
| 45   | 17.222 | 0        | 39.573 | 4490500000 |
| 63.6 | 16.273 | 0        | 23.736 | 688180000  |
| 55.9 | 17.04  | 0        | 188.5  | 2560500000 |
| 49.2 | 14.839 | 0        | 32.863 | 1783000000 |
| 15.8 | 16.445 | 0        | 4.5911 | 233690000  |
| 40   | 15.524 | 0        | 99.042 | 2397600000 |
| 27.6 | 17.718 | 0        | 13.409 | 2810300000 |
| 37.2 | 16.085 | 0        | 17.435 | 3117900000 |
| 33.4 | 31.231 | 0        | 27.781 | 1947000000 |
| 25.2 | 13.373 | 0        | 8.2635 | 887950000  |
| 28.9 | 9.1413 | 0        | 6.0343 | 230530000  |
| 21.7 | 15.807 | 0        | 7.0097 | 500240000  |
| 30   | 15.069 | 0        | 14.301 | 729310000  |
| 18.4 | 13.742 | 0        | 11.438 | 1107700000 |
| 37.4 | 13.015 | 0        | 13.773 | 658870000  |
| 42.3 | 17.951 | 0        | 61.399 | 6612600000 |
| 25   | 9.4771 | 0        | 6.3668 | 3198300000 |
| 17.4 | 7.8409 | 0.006379 | 1.5744 | 205490000  |
| 19.6 | 6.6767 | 0        | 7.0277 | 384140000  |
| 50.6 | 26.674 | 0        | 25.646 | 1703400000 |
| 32.2 | 29.885 | 0        | 29.191 | 4152900000 |
| 38.4 | 29.597 | 0        | 45.992 | 3749500000 |
| 42.6 | 22.889 | 0        | 48.31  | 1808700000 |



|      |        |            |        |             |
|------|--------|------------|--------|-------------|
| 10.8 | 28.68  | 0          | 15.941 | 660160000   |
| 2.2  | 83.693 | 0.0070764  | 1.5306 | 104500000   |
| 45.4 | 22.127 | 0          | 37.959 | 1681200000  |
| 41.3 | 24.205 | 0          | 72.018 | 3362800000  |
| 32.5 | 22.591 | 0          | 24.401 | 2944800000  |
| 57.6 | 32.838 | 0          | 201.05 | 7070500000  |
| 6.2  | 33.566 | 0.00042481 | 3.0487 | 27657000    |
| 3.6  | 33.279 | 0.0064199  | 1.6368 | 188430000   |
| 44   | 23.764 | 0          | 76.964 | 4990300000  |
| 11.4 | 172.88 | 0          | 160.18 | 3774400000  |
| 62.8 | 31.55  | 0          | 221.06 | 30402000000 |
| 6.6  | 39.254 | 0          | 6.5236 | 138440000   |
| 16.8 | 55.249 | 0          | 25.566 | 1224600000  |
| 2.3  | 83.571 | 0.006739   | 1.565  | 341640000   |
| 13.2 | 22.239 | 0          | 3.8465 | 153350000   |
| 11   | 25.428 | 0          | 20.679 | 1151700000  |
| 2.1  | 126.61 | 0          | 6.3483 | 90428000    |
| 3.7  | 38.403 | 0          | 64.614 | 3119400000  |
| 31.6 | 28.152 | 0          | 68.98  | 940030000   |
| 2.9  | 80.376 | 0.0070396  | 1.4927 | 116860000   |
| 12.1 | 50.213 | 0          | 24.529 | 478490000   |
| 0.4  | 565.03 | 0.0084404  | 1.4106 | 210970000   |
| 16   | 10.505 | 0          | 6.8091 | 112510000   |
| 64.3 | 11.083 | 0          | 285.76 | 18640000000 |
| 46.9 | 11.158 | 0          | 8.0499 | 218690000   |
| 42.6 | 11.721 | 0          | 46.715 | 74807000000 |
| 18.3 | 10.812 | 0.0067466  | 1.569  | 431970000   |
| 33.7 | 10.051 | 0          | 35.914 | 4202900000  |
| 3.7  | 48.234 | 0.00041982 | 2.9188 | 77391000    |
| 11.6 | 66.943 | 0          | 37.575 | 465120000   |
| 22.3 | 38.62  | 0          | 18.452 | 832240000   |
| 2.1  | 111.84 | 0          | 3.6972 | 346340000   |
| 15.6 | 51.863 | 0          | 27.204 | 875510000   |
| 30.3 | 22.371 | 0          | 25.065 | 1045500000  |
| 15.7 | 22.382 | 0          | 5.0502 | 190880000   |
| 28.5 | 58.388 | 0          | 35.603 | 1028400000  |
| 6.8  | 38.028 | 0          | 5.8412 | 166240000   |
| 13.9 | 30.191 | 0          | 19.252 | 179630000   |
| 10.9 | 54.043 | 0          | 34.232 | 359770000   |
| 13.3 | 47.129 | 0          | 28.002 | 392620000   |
| 22.1 | 72.322 | 0          | 21.815 | 842090000   |

|      |        |            |        |             |
|------|--------|------------|--------|-------------|
| 22.2 | 9.2833 | 0          | 13.02  | 235690000   |
| 40.6 | 15.236 | 0          | 17.319 | 687190000   |
| 5.8  | 50.964 | 0          | 8.4169 | 191360000   |
| 7    | 46.325 | 0.0031546  | 2.1289 | 366420000   |
| 12.7 | 46.6   | 0          | 5.5592 | 181350000   |
| 11.3 | 108.98 | 0          | 21.56  | 1392800000  |
| 44.9 | 72.585 | 0          | 308.82 | 7536000000  |
| 31.6 | 31.814 | 0          | 39.304 | 2712000000  |
| 17.2 | 18.382 | 0          | 9.5022 | 761710000   |
| 20.8 | 17.014 | 0          | 7.7867 | 304960000   |
| 6.7  | 20.626 | 0          | 9.7257 | 205390000   |
| 18.6 | 35.565 | 0          | 36.407 | 480990000   |
| 18.6 | 24.74  | 0          | 11.908 | 1045800000  |
| 28.8 | 86.161 | 0          | 79.983 | 2429200000  |
| 1.7  | 86.436 | 0.00043668 | 3.3559 | 70927000    |
| 6.1  | 110.78 | 0          | 10.088 | 240940000   |
| 27.2 | 129.56 | 0          | 142.51 | 3571800000  |
| 0.7  | 108.64 | 0.0070606  | 1.5086 | 1118200000  |
| 18.1 | 52.264 | 0          | 27.798 | 659370000   |
| 59.3 | 52.513 | 0          | 170.82 | 7430700000  |
| 20   | 16.377 | 0          | 3.8379 | 98612000    |
| 4.2  | 74.22  | 0          | 11.774 | 297910000   |
| 10.8 | 22.292 | 0.00041667 | 2.8272 | 52352000    |
| 9.2  | 42.906 | 0.00041719 | 2.8416 | 133930000   |
| 5.8  | 42.705 | 0          | 3.6083 | 139190000   |
| 7.5  | 48.964 | 0          | 13.918 | 74399000    |
| 29.8 | 42.747 | 0          | 52.908 | 1041000000  |
| 17   | 50.549 | 0          | 117.08 | 5875500000  |
| 20   | 49.812 | 0          | 28.634 | 1489200000  |
| 20   | 25.678 | 0          | 20.417 | 380230000   |
| 5.3  | 46.002 | 0          | 19.696 | 1024500000  |
| 19.4 | 45.974 | 0          | 46.437 | 3948800000  |
| 5.3  | 45.823 | 0          | 323.31 | 39329000000 |
| 16.9 | 45.998 | 0          | 95.703 | 3618000000  |
| 18.2 | 45.891 | 0          | 115.4  | 3686800000  |
| 19.9 | 46.879 | 0          | 206.65 | 7868300000  |
| 13.4 | 46.717 | 0          | 17.778 | 305380000   |
| 3    | 44.769 | 0.0020032  | 2.333  | 23723000    |
| 11.9 | 42.574 | 0          | 3.7487 | 118670000   |
| 55.3 | 42.598 | 0          | 131.48 | 7647000000  |
| 34.6 | 52.003 | 0          | 183.8  | 15143000000 |

|      |        |            |        |             |
|------|--------|------------|--------|-------------|
| 21.8 | 54.496 | 0          | 16.265 | 733380000   |
| 49.1 | 44.207 | 0          | 140.12 | 9034100000  |
| 24.2 | 46.233 | 0          | 83.502 | 2765300000  |
| 1.6  | 54.971 | 0.0070685  | 1.5193 | 91158000    |
| 23.2 | 55.584 | 0          | 52.813 | 610330000   |
| 19.5 | 32.105 | 0          | 22.02  | 520890000   |
| 4.9  | 40.506 | 0          | 9.0585 | 63656000    |
| 13.5 | 59.656 | 0          | 26.188 | 561520000   |
| 4.6  | 88.544 | 0          | 6.0925 | 178000000   |
| 3.6  | 49.911 | 0          | 8.7399 | 50571000    |
| 7.2  | 145.81 | 0          | 13.297 | 422500000   |
| 5.5  | 125.31 | 0          | 16.023 | 195280000   |
| 5.4  | 44.355 | 0.0035184  | 2.0117 | 228250000   |
| 3.2  | 27.706 | 0.0027712  | 2.2145 | 1057300000  |
| 25.6 | 75.441 | 0          | 45.703 | 1611700000  |
| 34.1 | 35.412 | 0          | 30.464 | 1131800000  |
| 32.3 | 35.649 | 0          | 32.112 | 572570000   |
| 54.8 | 35.406 | 0          | 191.71 | 8386800000  |
| 17.1 | 43.286 | 0          | 27.709 | 878410000   |
| 26.2 | 34.872 | 0          | 56.658 | 923140000   |
| 18   | 32.133 | 0          | 21.519 | 1657800000  |
| 21.3 | 49.735 | 0          | 111.19 | 3595500000  |
| 6.5  | 32.081 | 0          | 16.777 | 293120000   |
| 3    | 63.676 | 0.00041684 | 2.8313 | 85075000    |
| 7.6  | 34.194 | 0          | 7.6222 | 2809100000  |
| 71.1 | 12.811 | 0          | 99.986 | 5848400000  |
| 57   | 10.477 | 0          | 31.498 | 969570000   |
| 1.6  | 60.323 | 0.0042455  | 1.8428 | 13571000000 |
| 9.2  | 41.518 | 0.0004329  | 3.2536 | 201580000   |
| 11.5 | 40.855 | 0          | 18.863 | 478970000   |
| 11.3 | 42.197 | 0          | 21.084 | 540850000   |
| 2.2  | 119.03 | 0.0023857  | 2.2534 | 230040000   |
| 18.6 | 55.42  | 0          | 17.072 | 337830000   |
| 1.1  | 72.512 | 0.0070501  | 1.4974 | 370330000   |
| 12.3 | 26.518 | 0          | 8.8036 | 34856000    |
| 25.8 | 18.672 | 0          | 24.472 | 1136200000  |
| 1.6  | 127.53 | 0.0004207  | 2.9341 | 125800000   |
| 6    | 58.482 | 0          | 13.881 | 152480000   |
| 33.1 | 33.931 | 0          | 44.857 | 1843300000  |
| 11.1 | 31.715 | 0          | 35.607 | 205630000   |
| 34.4 | 34.155 | 0          | 68.129 | 1347200000  |

|      |        |            |        |             |
|------|--------|------------|--------|-------------|
| 24.1 | 74.569 | 0          | 77.065 | 2404200000  |
| 43.5 | 33.026 | 0          | 44.97  | 992750000   |
| 21.3 | 52.901 | 0          | 20.795 | 786520000   |
| 34.5 | 39.632 | 0          | 45.171 | 4549300000  |
| 25.5 | 32.904 | 0          | 305.74 | 34535000000 |
| 12.3 | 35.24  | 0          | 5.0664 | 140890000   |
| 27.9 | 32.931 | 0          | 64.147 | 5987200000  |
| 6.4  | 33.689 | 0          | 47.714 | 128990000   |
| 2.9  | 71.275 | 0.0053496  | 1.7262 | 86426000    |
| 2.8  | 50.076 | 0.00042141 | 2.9601 | 46048000    |
| 3.7  | 53.984 | 0          | 6.2635 | 33188000    |
| 9.3  | 58.336 | 0          | 5.6434 | 166460000   |
| 11.8 | 79.923 | 0          | 15.588 | 644820000   |
| 32.9 | 94.233 | 0          | 323.31 | 11007000000 |
| 3.5  | 116.51 | 0          | 4.2163 | 285510000   |
| 2.6  | 167.73 | 0          | 8.8323 | 324930000   |
| 38.7 | 41.864 | 0          | 111.19 | 7385800000  |
| 2.3  | 180.25 | 0          | 4.1103 | 202380000   |
| 3.9  | 121.63 | 0          | 10.329 | 295630000   |
| 7    | 121.37 | 0          | 28.224 | 260250000   |
| 3.5  | 143.23 | 0          | 9.4516 | 209340000   |
| 1    | 141.55 | 0          | 4.6093 | 28922000    |
| 15.9 | 11.542 | 0.00041632 | 2.8208 | 55728000    |
| 21   | 49.763 | 0          | 68.99  | 2200600000  |
| 2    | 89.876 | 0          | 17.196 | 106270000   |
| 4.9  | 49.857 | 0.00042319 | 2.9956 | 68481000    |
| 2.2  | 51.599 | 0          | 3.445  | 54352000    |
| 8.1  | 37.548 | 0          | 5.7266 | 239090000   |
| 43.1 | 13.159 | 0          | 24.667 | 561030000   |
| 23.6 | 102.09 | 0          | 83.157 | 2494500000  |
| 6.6  | 244.54 | 0          | 82.827 | 742930000   |
| 21.7 | 19.79  | 0          | 7.9322 | 500640000   |
| 18.8 | 31.835 | 0          | 11.91  | 315330000   |
| 14.2 | 25.323 | 0          | 22.202 | 286550000   |
| 16.8 | 13.281 | 0          | 11.439 | 1087700000  |
| 15.1 | 13.916 | 0          | 5.4933 | 335840000   |
| 12   | 10.803 | 0          | 6.5466 | 747840000   |
| 24.4 | 9.7251 | 0          | 8.3614 | 349870000   |
| 9.2  | 8.496  | 0.0038835  | 1.9336 | 225920000   |
| 17.5 | 53.664 | 0          | 54.911 | 851360000   |
| 32   | 58.081 | 0          | 69.845 | 2514600000  |

|      |        |            |        |             |
|------|--------|------------|--------|-------------|
| 23.3 | 56.381 | 0          | 33.157 | 2413500000  |
| 18.2 | 19.116 | 0.0016234  | 2.5217 | 289760000   |
| 4.9  | 52.797 | 0          | 4.1111 | 91504000    |
| 15   | 67.903 | 0          | 45.613 | 1939600000  |
| 7.5  | 58.47  | 0          | 34.054 | 426470000   |
| 16.7 | 18.757 | 0          | 4.2815 | 475090000   |
| 5.3  | 51.777 | 0          | 6.9992 | 50704000    |
| 16.6 | 46.797 | 0          | 11.563 | 208560000   |
| 4.7  | 46.648 | 0.0070843  | 1.5376 | 173130000   |
| 21   | 66.545 | 0          | 27.499 | 560610000   |
| 31.8 | 15.942 | 0          | 21.586 | 12157000000 |
| 67.6 | 24.603 | 0          | 158.93 | 5253200000  |
| 57.4 | 27.392 | 0          | 230.38 | 32378000000 |
| 22   | 82.86  | 0          | 106.18 | 4091600000  |
| 46.6 | 69.476 | 0          | 170.68 | 7595900000  |
| 10.8 | 82.348 | 0          | 24.397 | 1319700000  |
| 7.3  | 38.249 | 0          | 7.1171 | 349600000   |
| 26.5 | 23.501 | 0          | 29.108 | 4312000000  |
| 2.3  | 125.35 | 0          | 4.3428 | 88221000    |
| 3.7  | 72.286 | 0          | 6.6255 | 153820000   |
| 8.4  | 24.977 | 0          | 4.9719 | 122270000   |
| 8.6  | 90.82  | 0          | 12.382 | 608570000   |
| 32.6 | 27.883 | 0          | 59.208 | 3732200000  |
| 23   | 279.86 | 0          | 289.85 | 3680600000  |
| 44.9 | 282.34 | 0          | 323.31 | 23995000000 |
| 22.7 | 245.25 | 0          | 250.88 | 3092800000  |
| 45.4 | 274.22 | 0          | 323.31 | 23630000000 |
| 44.3 | 20.296 | 0          | 60.702 | 1869900000  |
| 22.8 | 33.995 | 0          | 7.0426 | 586630000   |
| 12.7 | 12.51  | 0          | 7.0909 | 92351000    |
| 12.1 | 55.72  | 0          | 17.872 | 215870000   |
| 20.8 | 42.097 | 0          | 21.824 | 446190000   |
| 1.3  | 101.1  | 0          | 4.0408 | 144830000   |
| 2.7  | 99.438 | 0          | 4.0547 | 478350000   |
| 25.5 | 21.807 | 0          | 9.5416 | 296450000   |
| 15.3 | 22.222 | 0          | 10.973 | 259100000   |
| 10.9 | 25.476 | 0          | 18.372 | 451560000   |
| 4.7  | 39.025 | 0.00043706 | 3.3701 | 539100000   |
| 26.1 | 17.89  | 0          | 7.6676 | 285330000   |
| 24.6 | 47.756 | 0          | 38.138 | 1099100000  |
| 9.9  | 17.319 | 0          | 18.865 | 171580000   |

|      |        |           |        |            |
|------|--------|-----------|--------|------------|
| 4.2  | 23.858 | 0.0035019 | 1.95   | 87485000   |
| 8    | 32.065 | 0         | 7.0147 | 626190000  |
| 14   | 18.936 | 0         | 7.7465 | 148340000  |
| 12.7 | 41.655 | 0         | 26.187 | 1846900000 |
| 4.7  | 46.127 | 0.0084497 | 1.4186 | 158810000  |
| 16.6 | 83.125 | 0         | 42.285 | 771100000  |
| 11.3 | 54.748 | 0         | 8.6692 | 228570000  |
| 3.4  | 77.566 | 0         | 12.063 | 276480000  |
| 33.7 | 62.581 | 0         | 116.56 | 4170300000 |
| 16.9 | 47.953 | 0         | 55.893 | 1332500000 |
| 4.5  | 60.319 | 0         | 12.253 | 84227000   |
| 38.7 | 31.375 | 0         | 47.422 | 2388800000 |
| 25.8 | 38.384 | 0         | 23.292 | 539110000  |
| 4.9  | 81.792 | 0         | 17.097 | 35800000   |
| 2.3  | 38.442 | 0.0067315 | 1.5511 | 110560000  |
| 8    | 66.59  | 0         | 18.78  | 251810000  |
| 1    | 80.597 | 0.0067139 | 1.5394 | 67360000   |
| 3.3  | 93.245 | 0         | 9.44   | 183130000  |
| 20.8 | 31.195 | 0         | 47.201 | 513590000  |
| 5.5  | 37.08  | 0         | 53.675 | 217650000  |
| 5.4  | 29.82  | 0         | 6.5567 | 157170000  |
| 17.5 | 61.678 | 0         | 37.548 | 1283500000 |
| 41.9 | 50.113 | 0         | 91.286 | 3229300000 |
| 34.7 | 36.154 | 0         | 117.96 | 6668000000 |
| 21.6 | 41.349 | 0         | 37.15  | 1270500000 |
| 17   | 38.158 | 0         | 8.3715 | 172310000  |
| 1.6  | 100.92 | 0.0031533 | 2.1215 | 118630000  |
| 9.8  | 84.67  | 0         | 12.161 | 332400000  |
| 23.2 | 78.178 | 0         | 93.867 | 2615700000 |
| 5.5  | 60.755 | 0         | 12.009 | 115450000  |
| 16.4 | 30.381 | 0         | 39.535 | 340300000  |
| 20   | 90.641 | 0         | 55.416 | 2715400000 |
| 4.3  | 243.16 | 0         | 28.752 | 523750000  |
| 7.1  | 42.23  | 0         | 6.6962 | 72747000   |
| 18.7 | 62.672 | 0         | 29.325 | 1419900000 |
| 2.8  | 1009.7 | 0         | 98.491 | 854580000  |
| 0.8  | 782.72 | 0         | 5.7768 | 293790000  |
| 2.2  | 140.87 | 0         | 4.2882 | 242340000  |
| 23.1 | 96.249 | 0         | 48.095 | 1594500000 |
| 90.5 | 22.576 | 0         | 323.31 | 3.8534E+11 |
| 7    | 22.47  | 0.0020024 | 2.3317 | 1413100000 |

|      |        |           |        |             |
|------|--------|-----------|--------|-------------|
| 26.7 | 37.387 | 0         | 28.413 | 2503200000  |
| 15.6 | 46.62  | 0         | 17.331 | 607180000   |
| 38.2 | 44.547 | 0         | 27.665 | 1578600000  |
| 12.9 | 83.355 | 0         | 16.811 | 532190000   |
| 1.9  | 132.01 | 0         | 8.8923 | 57030000    |
| 1.3  | 133.32 | 0         | 7.2747 | 79122000    |
| 7.3  | 33.88  | 0         | 4.9917 | 167480000   |
| 28.6 | 12.473 | 0         | 5.4259 | 411140000   |
| 28   | 13.17  | 0         | 32.377 | 1207000000  |
| 3.3  | 47.585 | 0         | 4.5338 | 53498000    |
| 41.7 | 60.448 | 0         | 120.91 | 4335500000  |
| 43.5 | 41.772 | 0         | 65.661 | 4441600000  |
| 53.2 | 76.723 | 0         | 323.31 | 31420000000 |
| 76.1 | 50.1   | 0         | 323.31 | 50878000000 |
| 55.5 | 74.596 | 0         | 323.31 | 17133000000 |
| 60.3 | 77.06  | 0         | 323.31 | 34021000000 |
| 9.4  | 55.992 | 0         | 7.8645 | 57203000    |
| 14.3 | 129.65 | 0         | 85.168 | 2857300000  |
| 6.3  | 38.884 | 0         | 4.5401 | 128260000   |
| 31.5 | 18.08  | 0         | 34.034 | 1407500000  |
| 26.3 | 10.458 | 0         | 14.926 | 834670000   |
| 6    | 51.091 | 0         | 10.883 | 144860000   |
| 2.8  | 39.776 | 0.0094891 | 1.3698 | 83882000    |
| 26.1 | 24.182 | 0         | 18.336 | 305110000   |
| 65   | 52.664 | 0         | 323.31 | 24251000000 |
| 4    | 194.74 | 0         | 8.9206 | 475980000   |
| 69.2 | 67.63  | 0         | 323.31 | 29674000000 |
| 63.1 | 269.82 | 0         | 323.31 | 2.5261E+11  |
| 4.6  | 253.62 | 0         | 48.32  | 683910000   |
| 12.2 | 21.175 | 0         | 8.2538 | 111210000   |
| 22.4 | 24.911 | 0         | 21.41  | 1346100000  |
| 20.4 | 22.705 | 0         | 16.957 | 900230000   |
| 7.2  | 27.127 | 0         | 14.94  | 261980000   |
| 24.6 | 11.642 | 0.0057099 | 1.6934 | 308160000   |
| 15   | 6.775  | 0.0042357 | 1.8213 | 41614000    |
| 42.2 | 44.783 | 0         | 174.19 | 4736800000  |
| 11.4 | 40.466 | 0         | 6.9576 | 106830000   |
| 32.1 | 39.502 | 0         | 78.161 | 1281000000  |
| 14.5 | 42.65  | 0         | 82.95  | 3707000000  |
| 7.6  | 75.167 | 0         | 7.4938 | 276790000   |
| 31.8 | 5.0256 | 0         | 3.5393 | 85570000    |

|      |        |            |        |             |
|------|--------|------------|--------|-------------|
| 77.3 | 5.0526 | 0          | 52.644 | 4761400000  |
| 5.2  | 104.2  | 0          | 6.2859 | 100380000   |
| 9    | 31.395 | 0.00041771 | 2.8466 | 322780000   |
| 9.2  | 33.942 | 0          | 4.4741 | 38486000    |
| 3.9  | 37.131 | 0.0016162  | 2.4662 | 82245000    |
| 12.1 | 221.88 | 0          | 136.05 | 1704000000  |
| 11.6 | 22.96  | 0          | 5.497  | 55017000    |
| 9.2  | 101.31 | 0          | 27.135 | 866470000   |
| 3.2  | 100.46 | 0          | 4.7209 | 148460000   |
| 10.2 | 104.17 | 0          | 21.196 | 449840000   |
| 18.4 | 149.5  | 0          | 93.948 | 3748400000  |
| 10.8 | 54.325 | 0          | 13.685 | 162560000   |
| 13.4 | 48.407 | 0          | 21.785 | 479910000   |
| 22.5 | 15.537 | 0          | 10.498 | 255300000   |
| 15.5 | 34.28  | 0.00042017 | 2.9239 | 183420000   |
| 8.8  | 67.589 | 0          | 19.511 | 535880000   |
| 1.6  | 172.79 | 0          | 4.4088 | 2700900000  |
| 6.1  | 181.91 | 0          | 23.611 | 515170000   |
| 10.2 | 58.415 | 0          | 6.9968 | 257130000   |
| 2.4  | 54.495 | 0.0087751  | 1.3837 | 76808000    |
| 8.6  | 37.817 | 0          | 3.5574 | 254330000   |
| 7.5  | 43.813 | 0          | 4.4912 | 74761000    |
| 21.1 | 20.059 | 0          | 4.4812 | 44983000    |
| 29.1 | 24.043 | 0          | 20.441 | 1050200000  |
| 71.2 | 32.191 | 0          | 142.26 | 20785000000 |
| 9.9  | 32.708 | 0          | 205.77 | 34287000000 |
| 24.2 | 29.02  | 0          | 32.482 | 13179000000 |
| 39.5 | 28.467 | 0          | 218.78 | 2838000000  |
| 15.3 | 61.341 | 0          | 106.42 | 984550000   |
| 7.3  | 23.574 | 0          | 3.6956 | 24166000    |
| 52.8 | 18.965 | 0          | 116.89 | 5532300000  |
| 1.2  | 273.99 | 0          | 14.939 | 190300000   |
| 6.3  | 19.556 | 0          | 4.4361 | 17219000    |
| 48.3 | 19.462 | 0          | 42.153 | 3136600000  |
| 3.8  | 80.208 | 0          | 5.1679 | 129910000   |
| 8.6  | 16.441 | 0.0024     | 2.3206 | 41435000    |
| 15   | 20.302 | 0          | 4.6133 | 175310000   |
| 12   | 17.936 | 0          | 29.428 | 210650000   |
| 1.9  | 57.136 | 0.00041494 | 2.785  | 72432000    |
| 16.4 | 88.846 | 0          | 59.008 | 1228400000  |
| 15.8 | 69.912 | 0          | 34.696 | 886570000   |



|      |        |            |        |             |
|------|--------|------------|--------|-------------|
| 1    | 288.71 | 0          | 4.131  | 105280000   |
| 15.2 | 62.566 | 0          | 28.536 | 4983100000  |
| 9.6  | 14.141 | 0.0035088  | 1.981  | 194350000   |
| 9.9  | 49.895 | 0          | 12.363 | 141070000   |
| 19.7 | 26.201 | 0          | 26.421 | 410350000   |
| 23.4 | 32.926 | 0          | 15.356 | 470620000   |
| 10.5 | 26.053 | 0          | 21.888 | 180600000   |
| 4.6  | 26.738 | 0          | 6.5462 | 158480000   |
| 38.5 | 18.841 | 0          | 105.95 | 1660200000  |
| 16.2 | 33.466 | 0          | 9.5156 | 405600000   |
| 0.6  | 267.46 | 0          | 3.5214 | 54128000    |
| 14.2 | 52.223 | 0          | 11.549 | 377110000   |
| 4.1  | 74.042 | 0.00041736 | 2.8442 | 110230000   |
| 1    | 3906.4 | 0          | 64.577 | 1209900000  |
| 3.1  | 50.135 | 0          | 18.864 | 1836200000  |
| 0    | 50.151 | 0          | 323.31 | 90416000000 |
| 5.3  | 49.909 | 0          | 41.359 | 5392100000  |
| 10   | 49.924 | 0          | 12.964 | 509080000   |
| 18.9 | 49.953 | 0          | 80.406 | 4299900000  |
| 24.7 | 50.418 | 0          | 45.348 | 1767000000  |
| 11.5 | 49.585 | 0          | 44.232 | 317010000   |
| 2.7  | 49.83  | 0          | 323.31 | 1.4471E+11  |
| 16.2 | 49.67  | 0          | 141.53 | 13081000000 |
| 30.3 | 49.508 | 0          | 58.67  | 2715100000  |
| 3.7  | 40.079 | 0          | 4.7589 | 466460000   |
| 10.4 | 39.311 | 0          | 18.501 | 215260000   |
| 55.2 | 11.675 | 0          | 46.957 | 6932900000  |
| 12.7 | 18.255 | 0          | 5.5928 | 212530000   |
| 26.4 | 46.415 | 0          | 47.06  | 2389500000  |
| 13.5 | 32.237 | 0          | 13.101 | 639390000   |
| 17.4 | 54.544 | 0          | 26.303 | 861460000   |
| 18.4 | 27.815 | 0          | 8.5657 | 287180000   |
| 7.2  | 53.516 | 0          | 13.159 | 532020000   |
| 16.8 | 56.613 | 0          | 15.758 | 441550000   |
| 47.7 | 117.81 | 0          | 323.31 | 19595000000 |
| 4.2  | 70.568 | 0          | 4.9195 | 273630000   |
| 3.8  | 44.325 | 0.0020105  | 2.387  | 112920000   |
| 14.9 | 44.789 | 0          | 16.936 | 586990000   |
| 1.8  | 107.24 | 0.00082713 | 2.7629 | 113730000   |
| 42.9 | 16.735 | 0          | 33.054 | 1212100000  |
| 13.9 | 18.007 | 0          | 3.9617 | 209290000   |

|      |        |            |        |             |
|------|--------|------------|--------|-------------|
| 24.5 | 22.406 | 0          | 5.3236 | 316020000   |
| 41.6 | 17.861 | 0          | 31.769 | 3009700000  |
| 48   | 17.138 | 0          | 50.65  | 4297700000  |
| 18.6 | 16.367 | 0          | 6.8114 | 923000000   |
| 2.5  | 123.97 | 0.0035266  | 2.0428 | 9192400000  |
| 1.4  | 118.2  | 0          | 4.4024 | 73242000    |
| 1.5  | 133.32 | 0          | 4.2716 | 18848000    |
| 12.3 | 8.5468 | 0.0042438  | 1.8412 | 28720000    |
| 5.2  | 58.677 | 0          | 44.639 | 456480000   |
| 2.4  | 67.35  | 0.0004223  | 2.9799 | 68278000    |
| 1.6  | 570.29 | 0          | 15.972 | 382260000   |
| 5.4  | 33.572 | 0          | 37.792 | 439560000   |
| 6.9  | 43.994 | 0          | 4.3072 | 202680000   |
| 71.7 | 24.838 | 0          | 135.05 | 4838800000  |
| 13   | 26.151 | 0          | 5.1249 | 166870000   |
| 80.8 | 33.247 | 0          | 133.65 | 7665300000  |
| 28.7 | 19.481 | 0          | 10.675 | 1206200000  |
| 11.7 | 34.481 | 0          | 11.804 | 551730000   |
| 58.8 | 9.1175 | 0          | 17.609 | 1017000000  |
| 21.3 | 176.43 | 0          | 85.832 | 2443900000  |
| 21.5 | 56.979 | 0          | 51.975 | 1256100000  |
| 5.1  | 60.007 | 0          | 9.3279 | 69876000    |
| 4.6  | 52.292 | 0.0045959  | 1.7318 | 35535000    |
| 32.2 | 103.45 | 0          | 144.37 | 3498500000  |
| 7.5  | 122.66 | 0          | 16.815 | 651720000   |
| 37.5 | 7.4454 | 0          | 15.736 | 1168100000  |
| 21.4 | 6.5386 | 0          | 3.9431 | 1061400000  |
| 45   | 13.527 | 0          | 28.778 | 2250500000  |
| 55.6 | 52.851 | 0          | 236.4  | 8741800000  |
| 60.9 | 48.234 | 0          | 264.83 | 15694000000 |
| 46   | 29.367 | 0          | 113.28 | 3846900000  |
| 20.2 | 10.435 | 0          | 43.99  | 761640000   |
| 68.3 | 9.7681 | 0          | 80.737 | 3354600000  |
| 9.5  | 40.691 | 0          | 14.77  | 148590000   |
| 17.2 | 6.3814 | 0.00043309 | 3.2651 | 49469000    |
| 12.2 | 100.19 | 0          | 24.783 | 540440000   |
| 11.2 | 56.001 | 0          | 11.037 | 624230000   |
| 1.6  | 109.22 | 0          | 4.7716 | 33802000    |
| 1.3  | 102.14 | 0.0035308  | 2.0559 | 1262900000  |
| 11.2 | 108.34 | 0          | 5.88   | 262170000   |
| 32.8 | 95.832 | 0          | 185.02 | 2850300000  |

|      |        |            |        |              |
|------|--------|------------|--------|--------------|
| 3.5  | 127.99 | 0          | 7.4873 | 181520000    |
| 1.4  | 88.047 | 0.0004363  | 3.3443 | 43175000     |
| 39   | 27.855 | 0          | 42.478 | 1134100000   |
| 17.3 | 26.946 | 0          | 8.2551 | 643610000    |
| 13.1 | 140.21 | 0          | 78.856 | 1520600000   |
| 6.7  | 72.26  | 0          | 13.643 | 157450000    |
| 27.5 | 39.666 | 0          | 82.623 | 3559000000   |
| 44.8 | 43.096 | 0          | 117.22 | 7339700000   |
| 3.1  | 45.817 | 0.0094856  | 1.3619 | 21983000     |
| 22.4 | 22.435 | 0          | 21.634 | 249450000    |
| 20.9 | 74.176 | 0          | 138.91 | 7515400000   |
| 72.5 | 116.72 | 0          | 323.31 | 2.2172E+11   |
| 53.3 | 89.321 | 0          | 323.31 | 180440000000 |
| 58.7 | 30.755 | 0          | 82.719 | 9663400000   |
| 39.3 | 31.732 | 0          | 44.275 | 4284400000   |
| 15.5 | 30.752 | 0          | 20.006 | 984960000    |
| 78.3 | 53.687 | 0          | 323.31 | 5.8226E+11   |
| 8.1  | 17.768 | 0          | 9.7368 | 173980000    |
| 11.9 | 19.778 | 0          | 3.5183 | 63237000     |
| 29.1 | 17.488 | 0          | 17.438 | 547530000    |
| 3.9  | 39.124 | 0          | 6.0696 | 153630000    |
| 19   | 25.452 | 0          | 9.2219 | 163380000    |
| 31.9 | 20.495 | 0          | 29.81  | 1138400000   |
| 3    | 48.439 | 0.0016116  | 2.4304 | 24020000     |
| 4.9  | 43.735 | 0.00042626 | 3.1031 | 172700000    |
| 4.7  | 65.052 | 0.0035047  | 1.9686 | 46048000     |
| 7.6  | 48.906 | 0.00082508 | 2.7324 | 69868000     |
| 9.7  | 49.419 | 0          | 22.941 | 972760000    |
| 4.5  | 33.913 | 0.00042301 | 2.9929 | 120710000    |
| 15.3 | 54.848 | 0          | 37.769 | 1596200000   |
| 35.7 | 44.708 | 0          | 78.127 | 1958000000   |
| 25.2 | 87.142 | 0          | 50.787 | 1275400000   |
| 4.6  | 32.459 | 0.0067189  | 1.5433 | 4875200000   |
| 4.4  | 213.42 | 0          | 7.335  | 171310000    |
| 13.8 | 309.27 | 0          | 158.37 | 4041900000   |
| 16.6 | 53.64  | 0          | 15.661 | 761930000    |
| 13   | 28.032 | 0          | 4.6056 | 232780000    |
| 70.6 | 66.406 | 0          | 323.31 | 17981000000  |
| 1.1  | 102.31 | 0.0035074  | 1.9765 | 164450000    |
| 6.6  | 33.772 | 0          | 48.245 | 305760000    |
| 0.8  | 100.58 | 0.0087912  | 1.3966 | 7026700000   |

|      |        |           |        |             |
|------|--------|-----------|--------|-------------|
| 31.1 | 27.095 | 0         | 54.028 | 4280900000  |
| 10.3 | 69.59  | 0         | 4.4144 | 291010000   |
| 16.2 | 123.09 | 0         | 50.209 | 1387800000  |
| 2    | 43.838 | 0.0070816 | 1.5347 | 95912000    |
| 15.7 | 59.105 | 0         | 19.983 | 546540000   |
| 9.6  | 35.73  | 0         | 4.138  | 71591000    |
| 5.5  | 60.629 | 0.0084466 | 1.4151 | 129410000   |
| 11.1 | 22.314 | 0         | 8.1242 | 220150000   |
| 36.5 | 27.854 | 0         | 312.47 | 7099300000  |
| 52.5 | 29.174 | 0         | 168.24 | 10016000000 |
| 39.3 | 28.302 | 0         | 239.61 | 9825900000  |
| 37.8 | 28.211 | 0         | 98.604 | 2233700000  |
| 29.2 | 27.7   | 0         | 323.31 | 15575000000 |
| 53.1 | 27.771 | 0         | 323.31 | 32705000000 |
| 18.3 | 32.841 | 0         | 17.268 | 566550000   |
| 1.3  | 131.6  | 0.0016188 | 2.4999 | 30880000    |
| 5.3  | 36.384 | 0         | 9.5057 | 16417000    |
| 3.3  | 57.232 | 0.0070527 | 1.5028 | 284820000   |
| 2.1  | 88.062 | 0         | 9.5345 | 71610000    |
| 59   | 60.545 | 0         | 323.31 | 33207000000 |

| <b>MS/MS count</b> | <b>Majority protein IDs</b> | <b>Protein names</b>                                  |
|--------------------|-----------------------------|-------------------------------------------------------|
| 4                  | P22315                      | Ferrochelatase, mitochondrial                         |
| 5                  | Q8BWU5                      | Probable tRNA N6-adenosine threonylcarbamoyltran.     |
| 10                 | Q8VHQ9                      | Acyl-coenzyme A thioesterase 11                       |
| 6                  | Q9R0E1                      | Procollagen-lysine,2-oxoglutarate 5-dioxygenase 3     |
| 2                  | Q64191                      | N(4)-(beta-N-acetylglucosaminy)-L-asparaginase        |
| 14                 | Q8C3W1                      | Uncharacterized protein C1orf198 homolog              |
| 7                  | Q9DBS2                      | Tumor protein p63-regulated gene 1-like protein       |
| 1                  | Q8BFP9                      | [Pyruvate dehydrogenase (acetyl-transferring)] kinase |
| 8                  | Q9CWZ7                      | Gamma-soluble NSF attachment protein                  |
| 2                  | Q8R146-2                    | Acylamino-acid-releasing enzyme                       |
| 2                  | Q3UPH1                      | Protein PRRC1                                         |
| 20                 | Q91VU0                      | Protein FAM3C                                         |
| 47                 | Q60605-2                    | Myosin light polypeptide 6                            |
| 112                | P08207                      | Protein S100-A10                                      |
| 6                  | P51660                      | Peroxisomal multifunctional enzyme type 2             |
| 18                 | Q3UPL5                      | Uncharacterized protein C11orf96 homolog              |
| 49                 | Q33DR3-3                    | Decaprenyl-diphosphate synthase subunit 2             |
| 64                 | Q9ET54-3                    | Palladin                                              |
| 511                | Q80X19-2                    | Collagen alpha-1(XIV) chain                           |
| 112                | P31001                      | Desmin                                                |
| 12                 | Q80W54                      | CAAX prenyl protease 1 homolog                        |
| 16                 | Q9JJH1                      | Ribonuclease 4                                        |
| 55                 | P07214                      | SPARC                                                 |
| 26                 | P30412                      | Peptidyl-prolyl cis-trans isomerase C                 |
| 38                 | Q9R1T4-2                    | Septin-6                                              |
| 34                 | Q61398                      | Procollagen C-endopeptidase enhancer 1                |
| 29                 | Q6P9J9                      | Anoctamin-6                                           |
| 10                 | Q05D44                      | Eukaryotic translation initiation factor 5B           |
| 153                | Q8CI51                      | PDZ and LIM domain protein 5                          |
| 9                  | Q9EPW0                      | Type I inositol 3,4-bisphosphate 4-phosphatase        |
| 113                | O08532-3                    | Voltage-dependent calcium channel subunit alpha-2/    |
| 40                 | Q9ESD7-3                    | Dysferlin                                             |
| 15                 | Q80SZ7                      | Guanine nucleotide-binding protein G(I)/G(S)/G(O) su  |
| 17                 | Q6PER3                      | Microtubule-associated protein RP/EB family membe     |
| 41                 | Q922F4                      | Tubulin beta-6 chain                                  |
| 30                 | A2AJI0-2                    | MAP7 domain-containing protein 1                      |
| 46                 | O70373                      | Xin actin-binding repeat-containing protein 1         |

|      |          |                                                        |
|------|----------|--------------------------------------------------------|
| 45   | Q8BFY6   | Peflin                                                 |
| 51   | Q6PIE5   | Sodium/potassium-transporting ATPase subunit alph.     |
| 582  | Q8C6K9   | Collagen alpha-6(VI) chain                             |
| 1618 | Q62009-3 | Periostin                                              |
| 35   | D3Z7P3-2 | Glutaminase kidney isoform, mitochondrial              |
| 33   | Q8VCF0   | Mitochondrial antiviral-signaling protein              |
| 158  | Q9QZZ6   | Dermatopontin                                          |
| 351  | O35206   | Collagen alpha-1(XV) chain                             |
| 148  | Q80UG5-3 | Septin-9                                               |
| 6    | Q9DBZ1   | Inhibitor of nuclear factor kappa-B kinase-interacting |
| 287  | Q9DAW9   | Calponin-3                                             |
| 124  | P28301   | Protein-lysine 6-oxidase                               |
| 51   | O35855   | Branched-chain-amino-acid aminotransferase, mitocl     |
| 118  | Q8BMK4   | Cytoskeleton-associated protein 4                      |
| 328  | Q91YE8   | Synaptopodin-2                                         |
| 449  | Q921U8   | Smoothelin                                             |
| 60   | Q61166   | Microtubule-associated protein RP/EB family membe      |
| 61   | Q9QYC0-2 | Alpha-adducin                                          |
| 51   | P26883   | Peptidyl-prolyl cis-trans isomerase FKBP1A             |
| 282  | Q640N1   | Adipocyte enhancer-binding protein 1                   |
| 997  | Q08091   | Calponin-1                                             |
| 17   | P47753   | F-actin-capping protein subunit alpha-1                |
| 17   | Q9DAS9   | Guanine nucleotide-binding protein G(I)/G(S)/G(O) su   |
| 366  | P54320   | Elastin                                                |
| 93   | Q9R087   | Glypican-6                                             |
| 337  | P19324   | Serpin H1                                              |
| 423  | Q8VHX6   | Filamin-C                                              |
| 39   | P56135   | ATP synthase subunit f, mitochondrial                  |
| 960  | Q02788   | Collagen alpha-2(VI) chain                             |
| 1030 | P28653   | Biglycan                                               |
| 1299 | Q04857   | Collagen alpha-1(VI) chain                             |
| 860  | Q9WVA4   | Transgelin-2                                           |
| 318  | O55222   | Integrin-linked protein kinase                         |
| 50   | O08599   | Syntaxin-binding protein 1                             |
| 384  | Q3TJD7   | PDZ and LIM domain protein 7                           |
| 31   | Q9QZS0   | Collagen alpha-3(IV) chain                             |
| 291  | Q99K41   | EMILIN-1                                               |
| 153  | Q8R2Y2-2 | Cell surface glycoprotein MUC18                        |
| 380  | P09470   | Angiotensin-converting enzyme                          |
| 95   | Q3TZZ7   | Extended synaptotagmin-2                               |
| 1489 | Q7TPR4   | Alpha-actinin-1                                        |

|     |          |                                                      |
|-----|----------|------------------------------------------------------|
| 457 | Q62188   | Dihydropyrimidinase-related protein 3                |
| 172 | Q9WTR5   | Cadherin-13                                          |
| 98  | Q05BC3-2 | Echinoderm microtubule-associated protein-like 1     |
| 548 | P07356   | Annexin A2                                           |
| 388 | Q8VHY0   | Chondroitin sulfate proteoglycan 4                   |
| 572 | P39061-2 | Collagen alpha-1(XVIII) chain                        |
| 45  | P62192   | 26S protease regulatory subunit 4                    |
| 437 | O54724   | Polymerase I and transcript release factor           |
| 37  | Q9Z1Y4   | Thyroid receptor-interacting protein 6               |
| 184 | P62737   | Actin, aortic smooth muscle                          |
| 142 | P42208   | Septin-2                                             |
| 372 | P62962   | Profilin-1                                           |
| 425 | Q8CIB5   | Fermitin family homolog 2                            |
| 93  | Q9Z2W0   | Aspartyl aminopeptidase                              |
| 127 | P97429   | Annexin A4                                           |
| 79  | Q64433   | 10 kDa heat shock protein, mitochondrial             |
| 559 | P10649   | Glutathione S-transferase Mu 1                       |
| 164 | Q9EQH3   | Vacuolar protein sorting-associated protein 35       |
| 554 | P48036   | Annexin A5                                           |
| 37  | O35678   | Monoglyceride lipase                                 |
| 67  | P62827   | GTP-binding nuclear protein Ran                      |
| 31  | P84089   | Enhancer of rudimentary homolog                      |
| 96  | Q63918   | Serum deprivation-response protein                   |
| 131 | Q3UTY6   | Thrombospondin type-1 domain-containing protein 4    |
| 263 | P08074   | Carbonyl reductase [NADPH] 2                         |
| 37  | Q8R180   | ERO1-like protein alpha                              |
| 53  | P48758   | Carbonyl reductase [NADPH] 1                         |
| 337 | P10107   | Annexin A1                                           |
| 252 | P70168   | Importin subunit beta-1                              |
| 75  | Q99L20   | Glutathione S-transferase theta-3                    |
| 22  | Q9CQM5   | Thioredoxin domain-containing protein 17             |
| 55  | Q99PV0   | Pre-mRNA-processing-splicing factor 8                |
| 79  | P54775   | 26S protease regulatory subunit 6B                   |
| 19  | Q6PDI5-2 | Proteasome-associated protein ECM29 homolog          |
| 39  | P27048   | Small nuclear ribonucleoprotein-associated protein B |
| 18  | P47915   | 60S ribosomal protein L29                            |
| 182 | Q8VDM4   | 26S proteasome non-ATPase regulatory subunit 2       |
| 20  | Q9D8Y0   | EF-hand domain-containing protein D2                 |
| 38  | Q9Z1R2   | Large proline-rich protein BAG6                      |
| 77  | Q9JLJ2   | 4-trimethylaminobutyraldehyde dehydrogenase          |
| 11  | Q9DBD0   | Inhibitor of carbonic anhydrase                      |

|     |          |                                                      |
|-----|----------|------------------------------------------------------|
| 62  | Q9R112   | Sulfide:quinone oxidoreductase, mitochondrial        |
| 68  | Q60710-2 | Deoxynucleoside triphosphate triphosphohydrolase 5   |
| 11  | Q9WV80   | Sorting nexin-1                                      |
| 121 | P80317   | T-complex protein 1 subunit zeta                     |
| 120 | P97372   | Proteasome activator complex subunit 2               |
| 27  | Q6PDQ2   | Chromodomain-helicase-DNA-binding protein 4          |
| 74  | Q9EQ06   | Estradiol 17-beta-dehydrogenase 11                   |
| 18  | Q8R2K1-5 | Fucose mutarotase                                    |
| 22  | P84104-2 | Serine/arginine-rich splicing factor 3               |
| 10  | P35831   | Tyrosine-protein phosphatase non-receptor type 12    |
| 62  | P07309   | Transthyretin                                        |
| 112 | P01029   | Complement C4-B                                      |
| 28  | Q99JF8-2 | PC4 and SFRS1-interacting protein                    |
| 37  | P70398   | Probable ubiquitin carboxyl-terminal hydrolase FAF-X |
| 25  | Q00519   | Xanthine dehydrogenase/oxidase                       |
| 19  | P05201   | Aspartate aminotransferase, cytoplasmic              |
| 16  | Q9R111   | Guanine deaminase                                    |
| 39  | Q8VCR7   | Alpha/beta hydrolase domain-containing protein 14B   |
| 82  | P29391   | Ferritin light chain 1                               |
| 36  | Q8R164   | Valacyclovir hydrolase                               |
| 35  | Q9R1P0   | Proteasome subunit alpha type-4                      |
| 35  | Q8BG51   | Mitochondrial Rho GTPase 1                           |
| 6   | Q69ZR2   | E3 ubiquitin-protein ligase HECTD1                   |
| 7   | Q9CZU3   | Superkiller viralicidic activity 2-like 2            |
| 39  | Q9CQM9   | Glutaredoxin-3                                       |
| 8   | Q9CQV7   | Mitochondrial import inner membrane translocase su   |
| 35  | Q8QZY1   | Eukaryotic translation initiation factor 3 subunit L |
| 4   | Q569Z5-2 | Probable ATP-dependent RNA helicase DDX46            |
| 24  | O70475   | UDP-glucose 6-dehydrogenase                          |
| 40  | Q9ESB3   | Histidine-rich glycoprotein                          |
| 3   | Q8R3U1   | HRAS-like suppressor 3                               |
| 46  | P00329   | Alcohol dehydrogenase 1                              |
| 3   | Q9DBG7   | Signal recognition particle receptor subunit alpha   |
| 29  | Q62086   | Serum paraoxonase/arylesterase 2                     |
| 45  | P12023-3 | Amyloid beta A4 protein                              |
| 3   | Q62193   | Replication protein A 32 kDa subunit                 |
| 33  | Q03734   | Serine protease inhibitor A3M                        |
| 14  | O89051   | Integral membrane protein 2B                         |
| 14  | B1AXP6-2 | Mitochondrial import receptor subunit TOM5 homolo    |
| 8   | Q5F285   | Transmembrane protein 256                            |
| 133 | P01872   | Ig mu chain C region                                 |



|     |          |                                                                     |
|-----|----------|---------------------------------------------------------------------|
| 3   | Q07797   | Galectin-3-binding protein                                          |
| 9   | Q91X52   | L-xylulose reductase                                                |
| 14  | Q61982   | Neurogenic locus notch homolog protein 3                            |
| 13  | Q7TNF8-2 | Peripheral-type benzodiazepine receptor-associated                  |
| 1   | P26450   | Phosphatidylinositol 3-kinase regulatory subunit alpha              |
| 12  | Q91W69   | Epsin-3                                                             |
| 14  | O54784   | Death-associated protein kinase 3                                   |
| 4   | Q9Z2T6   | Keratin, type II cuticular Hb5                                      |
| 18  | E9Q557   | Desmoplakin                                                         |
| 5   | A2BIM8   | Major urinary protein 1                                             |
| 2   | Q8CIG3-2 | Lysine-specific histone demethylase 1B                              |
| 7   | Q8K0Y2   | Keratin, type I cuticular Ha3-I                                     |
| 12  | P62818   | Protein S100-A3                                                     |
| 13  | O08633   | Keratin-associated protein 8-1                                      |
| 6   | Q925H6   | Keratin-associated protein 19-3                                     |
| 390 | Q61838   | Alpha-2-macroglobulin                                               |
| 39  | Q8BGQ7   | Alanine--tRNA ligase, cytoplasmic                                   |
| 4   | Q3THG9   | Alanyl-tRNA editing protein Aarsd1                                  |
| 44  | P61922-2 | 4-aminobutyrate aminotransferase, mitochondrial                     |
| 10  | Q8K440-2 | ATP-binding cassette sub-family A member 8-B                        |
| 19  | P70170-3 | ATP-binding cassette sub-family C member 9                          |
| 13  | P55096   | ATP-binding cassette sub-family D member 3                          |
| 16  | P61222   | ATP-binding cassette sub-family E member 1                          |
| 15  | Q6P542   | ATP-binding cassette sub-family F member 1                          |
| 4   | Q8K4F5   | Alpha/beta hydrolase domain-containing protein 11                   |
| 33  | Q99LR1   | Monoacylglycerol lipase ABHD12                                      |
| 34  | Q9Z1Q2   | Abhydrolase domain-containing protein 16A                           |
| 15  | Q9DBL9   | 1-acylglycerol-3-phosphate O-acyltransferase ABHD5                  |
| 4   | Q8CBW3-5 | Abl interactor 1                                                    |
| 8   | Q8K4G5-3 | Actin-binding LIM protein 1                                         |
| 46  | Q4KML4   | Costars family protein ABRACL                                       |
| 71  | Q921H8   | 3-ketoacyl-CoA thiolase A, peroxisomal                              |
| 425 | Q8BWT1   | 3-ketoacyl-CoA thiolase, mitochondrial                              |
| 84  | Q5SWU9   | Acetyl-CoA carboxylase 1                                            |
| 3   | Q8K370   | Acyl-CoA dehydrogenase family member 10                             |
| 7   | Q8JZN5   | Acyl-CoA dehydrogenase family member 9, mitochondrion               |
| 274 | P51174   | Long-chain specific acyl-CoA dehydrogenase, mitochondrion           |
| 181 | P45952   | Medium-chain specific acyl-CoA dehydrogenase, mitochondrion         |
| 122 | Q07417   | Short-chain specific acyl-CoA dehydrogenase, mitochondrion          |
| 59  | Q9DBL1   | Short/branched chain specific acyl-CoA dehydrogenase, mitochondrion |
| 279 | P50544   | Very long-chain specific acyl-CoA dehydrogenase, mitochondrion      |

|      |          |                                                      |
|------|----------|------------------------------------------------------|
| 173  | Q61282   | Aggrecan core protein                                |
| 252  | Q8QZT1   | Acetyl-CoA acetyltransferase, mitochondrial          |
| 68   | Q8CAY6   | Acetyl-CoA acetyltransferase, cytosolic              |
| 4    | Q9JIX8-3 | Apoptotic chromatin condensation inducer in the nuc  |
| 277  | Q91V92   | ATP-citrate synthase                                 |
| 123  | P28271   | Cytoplasmic aconitate hydratase                      |
| 764  | Q99KI0   | Aconitate hydratase, mitochondrial                   |
| 34   | Q9CQR4   | Acyl-coenzyme A thioesterase 13                      |
| 64   | Q9QYR9   | Acyl-coenzyme A thioesterase 2, mitochondrial        |
| 7    | Q91V12-2 | Cytosolic acyl coenzyme A thioester hydrolase        |
| 105  | Q9R0X4   | Acyl-coenzyme A thioesterase 9, mitochondrial        |
| 36   | Q9D358-2 | Low molecular weight phosphotyrosine protein phospho |
| 11   | Q8VCW8   | Acyl-CoA synthetase family member 2, mitochondrial   |
| 2    | Q3URE1   | Acyl-CoA synthetase family member 3, mitochondrial   |
| 289  | P41216   | Long-chain-fatty-acid--CoA ligase 1                  |
| 8    | Q8JZR0   | Long-chain-fatty-acid--CoA ligase 5                  |
| 84   | P60710   | Actin, cytoplasmic 1                                 |
| 4093 | P68033   | Actin, alpha cardiac muscle 1                        |
| 1501 | P63260   | Actin, cytoplasmic 2                                 |
| 3    | Q9Z2N8   | Actin-like protein 6A                                |
| 447  | P57780   | Alpha-actinin-4                                      |
| 25   | Q9QZB7   | Actin-related protein 10                             |
| 39   | P61164   | Alpha-centractin                                     |
| 122  | Q8R5C5   | Beta-centractin                                      |
| 173  | P61161   | Actin-related protein 2                              |
| 195  | Q99JY9   | Actin-related protein 3                              |
| 15   | P56376   | Acylphosphatase-1                                    |
| 2    | O35598   | Disintegrin and metalloproteinase domain-containing  |
| 8    | Q80T21   | ADAMTS-like protein 4                                |
| 45   | Q60936   | Atypical kinase ADCK3, mitochondrial                 |
| 50   | P84309   | Adenylate cyclase type 5                             |
| 1    | P51829   | Adenylate cyclase type 7                             |
| 18   | Q9QYB5-2 | Gamma-adducin                                        |
| 129  | P28474   | Alcohol dehydrogenase class-3                        |
| 11   | Q64437   | Alcohol dehydrogenase class 4 mu/sigma chain         |
| 19   | Q60994   | Adiponectin                                          |
| 39   | P55264   | Adenosine kinase                                     |
| 9    | Q8VDL4-3 | ADP-dependent glucokinase                            |
| 6    | Q3UYH7   | Beta-adrenergic receptor kinase 2                    |
| 5    | Q9JKV1   | Proteasomal ubiquitin receptor ADRM1                 |
| 81   | P54822   | Adenylosuccinate lyase                               |

|      |          |                                                     |
|------|----------|-----------------------------------------------------|
| 2    | P28650   | Adenylosuccinate synthetase isozyme 1               |
| 17   | Q8JZQ2   | AFG3-like protein 2                                 |
| 2    | O89020-2 | Afamin                                              |
| 7    | Q9ESW4-2 | Acylglycerol kinase, mitochondrial                  |
| 11   | Q8CJG0   | Protein argonaute-2                                 |
| 4    | Q8K3K7   | 1-acyl-sn-glycerol-3-phosphate acyltransferase beta |
| 72   | A2ASQ1-3 | Agrin                                               |
| 64   | P50247   | Adenosylhomocysteinase                              |
| 16   | Q80SW1   | Putative adenosylhomocysteinase 2                   |
| 6    | Q8BK64   | Activator of 90 kDa heat shock protein ATPase homol |
| 102  | P29699   | Alpha-2-HS-glycoprotein                             |
| 14   | Q9Z0X1   | Apoptosis-inducing factor 1, mitochondrial          |
| 1    | Q8BUE4   | Apoptosis-inducing factor 2                         |
| 37   | P31230   | Aminoacyl tRNA synthase complex-interacting multifi |
| 36   | Q8R010   | Aminoacyl tRNA synthase complex-interacting multifi |
| 8    | O08915   | AH receptor-interacting protein                     |
| 120  | Q9R0Y5   | Adenylate kinase isoenzyme 1                        |
| 92   | Q9WTP6-2 | Adenylate kinase 2, mitochondrial                   |
| 138  | Q9WTP7   | GTP:AMP phosphotransferase AK3, mitochondrial       |
| 39   | Q9WTQ5-2 | A-kinase anchor protein 12                          |
| 112  | Q9JII6   | Alcohol dehydrogenase [NADP(+)]                     |
| 141  | P45376   | Aldose reductase                                    |
| 16   | P21300   | Aldose reductase-related protein 1                  |
| 22   | P45377   | Aldose reductase-related protein 2                  |
| 26   | Q8CG76   | Aflatoxin B1 aldehyde reductase member 2            |
| 10   | Q9D1F4   | Proline-rich AKT1 substrate 1                       |
| 10   | P10518   | Delta-aminolevulinic acid dehydratase               |
| 2241 | P07724   | Serum albumin                                       |
| 27   | Q61490   | CD166 antigen                                       |
| 12   | Q571I9   | Aldehyde dehydrogenase family 16 member A1          |
| 7    | Q9Z110-2 | Delta-1-pyrroline-5-carboxylate synthase            |
| 14   | P24549   | Retinal dehydrogenase 1                             |
| 10   | Q8K009   | Mitochondrial 10-formyltetrahydrofolate dehydroger  |
| 551  | P47738   | Aldehyde dehydrogenase, mitochondrial               |
| 73   | P47740   | Fatty aldehyde dehydrogenase                        |
| 55   | Q8CHT0   | Delta-1-pyrroline-5-carboxylate dehydrogenase, mito |
| 5    | Q8BWF0   | Succinate-semialdehyde dehydrogenase, mitochondr    |
| 152  | Q9EQ20   | Methylmalonate-semialdehyde dehydrogenase [acyl     |
| 83   | Q9DBF1-2 | Alpha-aminoadipic semialdehyde dehydrogenase        |
| 421  | P05064   | Fructose-bisphosphate aldolase A                    |
| 4    | Q9DBE8   | Alpha-1,3/1,6-mannosyltransferase ALG2              |

|     |          |                                                      |
|-----|----------|------------------------------------------------------|
| 3   | P30355   | Arachidonate 5-lipoxygenase-activating protein       |
| 16  | O08583-2 | THO complex subunit 4                                |
| 2   | P53995   | Anaphase-promoting complex subunit 1                 |
| 129 | Q02357-5 | Ankyrin-1                                            |
| 20  | Q8C8R3   | Ankyrin-2                                            |
| 9   | Q810B6   | Rabankyrin-5                                         |
| 23  | Q8BH79-2 | Anoctamin-10                                         |
| 39  | O35381   | Acidic leucine-rich nuclear phosphoprotein 32 family |
| 23  | Q9EST5   | Acidic leucine-rich nuclear phosphoprotein 32 family |
| 19  | P97822-2 | Acidic leucine-rich nuclear phosphoprotein 32 family |
| 343 | P97449   | Aminopeptidase N                                     |
| 139 | P97384   | Annexin A11                                          |
| 194 | O35639   | Annexin A3                                           |
| 992 | P14824   | Annexin A6                                           |
| 87  | Q07076   | Annexin A7                                           |
| 857 | O70423   | Membrane primary amine oxidase                       |
| 4   | O54754   | Aldehyde oxidase 1                                   |
| 36  | O35643   | AP-1 complex subunit beta-1                          |
| 14  | P22892   | AP-1 complex subunit gamma-1                         |
| 108 | P17426-2 | AP-2 complex subunit alpha-1                         |
| 220 | P17427   | AP-2 complex subunit alpha-2                         |
| 275 | Q9DBG3   | AP-2 complex subunit beta                            |
| 67  | P84091   | AP-2 complex subunit mu                              |
| 18  | P62743   | AP-2 complex subunit sigma                           |
| 24  | Q9Z1T1   | AP-3 complex subunit beta-1                          |
| 4   | O54774   | AP-3 complex subunit delta-1                         |
| 25  | P28352   | DNA-(apurinic or apyrimidinic site) lyase            |
| 24  | O35841   | Apoptosis inhibitor 5                                |
| 11  | Q9D7N9   | Adipocyte plasma membrane-associated protein         |
| 210 | Q00623   | Apolipoprotein A-I                                   |
| 72  | Q8K4Z3   | NAD(P)H-hydrate epimerase                            |
| 27  | P09813   | Apolipoprotein A-II                                  |
| 75  | P06728   | Apolipoprotein A-IV                                  |
| 2   | P34928   | Apolipoprotein C-I                                   |
| 3   | Q05020   | Apolipoprotein C-II                                  |
| 37  | P08226   | Apolipoprotein E                                     |
| 127 | Q01339   | Beta-2-glycoprotein 1                                |
| 6   | Q9DCZ4-2 | Apolipoprotein O                                     |
| 27  | Q78IK4   | MICOS complex subunit Mic27                          |
| 33  | Q8K3H0   | DCC-interacting protein 13-alpha                     |
| 60  | P08030   | Adenine phosphoribosyltransferase                    |

|     |          |                                                        |
|-----|----------|--------------------------------------------------------|
| 33  | Q02013   | Aquaporin-1                                            |
| 36  | Q5XJY5   | Coatomer subunit delta                                 |
| 132 | P84078   | ADP-ribosylation factor 1                              |
| 15  | Q8BSL7   | ADP-ribosylation factor 2                              |
| 51  | P61750   | ADP-ribosylation factor 4                              |
| 15  | P84084   | ADP-ribosylation factor 5                              |
| 3   | P62331   | ADP-ribosylation factor 6                              |
| 3   | A2A5R2   | Brefeldin A-inhibited guanine nucleotide-exchange pi   |
| 97  | Q5FWK3   | Rho GTPase-activating protein 1                        |
| 12  | Q3UIA2-4 | Rho GTPase-activating protein 17                       |
| 1   | Q811P8   | Rho GTPase-activating protein 32                       |
| 137 | Q99PT1   | Rho GDP-dissociation inhibitor 1                       |
| 14  | Q61599   | Rho GDP-dissociation inhibitor 2                       |
| 24  | Q60875-5 | Rho guanine nucleotide exchange factor 2               |
| 9   | Q9ES28-8 | Rho guanine nucleotide exchange factor 7               |
| 19  | P61211   | ADP-ribosylation factor-like protein 1                 |
| 32  | Q9WUL7   | ADP-ribosylation factor-like protein 3                 |
| 14  | Q9JKW0   | ADP-ribosylation factor-like protein 6-interacting pro |
| 102 | Q8R5J9   | PRA1 family protein 3                                  |
| 40  | Q9CQW2   | ADP-ribosylation factor-like protein 8B                |
| 4   | Q9D7A8   | Armadillo repeat-containing protein 1                  |
| 128 | Q9WV32   | Actin-related protein 2/3 complex subunit 1B           |
| 177 | Q9CVB6   | Actin-related protein 2/3 complex subunit 2            |
| 142 | Q9JM76   | Actin-related protein 2/3 complex subunit 3            |
| 135 | P59999   | Actin-related protein 2/3 complex subunit 4            |
| 17  | Q9CPW4   | Actin-related protein 2/3 complex subunit 5            |
| 17  | Q9D898   | Actin-related protein 2/3 complex subunit 5-like prot  |
| 64  | Q9WV54   | Acid ceramidase                                        |
| 21  | Q91YI0   | Argininosuccinate lyase                                |
| 7   | O54984   | ATPase Asna1                                           |
| 67  | Q8BSY0   | Aspartyl/asparaginyl beta-hydroxylase                  |
| 694 | Q99MQ4   | Asporin                                                |
| 13  | Q8C0M9   | Isoaspartyl peptidase/L-asparaginase                   |
| 16  | Q92511-2 | ATPase family AAA domain-containing protein 3          |
| 3   | Q99J83   | Autophagy protein 5                                    |
| 14  | Q9D906   | Ubiquitin-like modifier-activating enzyme ATG7         |
| 195 | Q9CWJ9   | Bifunctional purine biosynthesis protein PURH          |
| 14  | Q6PA06   | Atlastin-2                                             |
| 214 | Q91YH5   | Atlastin-3                                             |
| 64  | O08997   | Copper transport protein ATOX1                         |
| 175 | Q8VDN2   | Sodium/potassium-transporting ATPase subunit alph.     |

|     |          |                                                     |
|-----|----------|-----------------------------------------------------|
| 20  | P14094   | Sodium/potassium-transporting ATPase subunit beta   |
| 29  | P97370   | Sodium/potassium-transporting ATPase subunit beta   |
| 188 | O55143-2 | Sarcoplasmic/endoplasmic reticulum calcium ATPase   |
| 17  | Q64518-3 | Sarcoplasmic/endoplasmic reticulum calcium ATPase   |
| 9   | G5E829   | Plasma membrane calcium-transporting ATPase 1       |
| 94  | Q6Q477-2 | Calcium-transporting ATPase                         |
| 520 | Q03265   | ATP synthase subunit alpha, mitochondrial           |
| 832 | P56480   | ATP synthase subunit beta, mitochondrial            |
| 100 | Q91VR2   | ATP synthase subunit gamma, mitochondrial           |
| 81  | Q9CQQ7   | ATP synthase F(0) complex subunit B1, mitochondrial |
| 127 | Q9DCX2   | ATP synthase subunit d, mitochondrial               |
| 34  | Q06185   | ATP synthase subunit e, mitochondrial               |
| 7   | P97450   | ATP synthase-coupling factor 6, mitochondrial       |
| 74  | Q9CPQ8   | ATP synthase subunit g, mitochondrial               |
| 214 | Q9DB20   | ATP synthase subunit O, mitochondrial               |
| 6   | Q9Z1G4-3 | V-type proton ATPase 116 kDa subunit a isoform 1    |
| 11  | P51863   | V-type proton ATPase subunit d 1                    |
| 49  | P50516   | V-type proton ATPase catalytic subunit A            |
| 7   | P62814   | V-type proton ATPase subunit B, brain isoform       |
| 11  | P50518   | V-type proton ATPase subunit E 1                    |
| 11  | P28658   | Ataxin-10                                           |
| 6   | Q9JLZ3   | Methylglutaconyl-CoA hydratase, mitochondrial       |
| 10  | Q00993   | Tyrosine-protein kinase receptor UFO                |
| 13  | P01887   | Beta-2-microglobulin                                |
| 12  | Q9Z2Y2   | Beta-1,4-galactosyltransferase 2                    |
| 38  | Q9JLV1   | BAG family molecular chaperone regulator 3          |
| 9   | Q8CI32   | BAG family molecular chaperone regulator 5          |
| 84  | O54962   | Barrier-to-autointegration factor                   |
| 4   | Q07813   | Apoptosis regulator BAX                             |
| 214 | Q9R069   | Basal cell adhesion molecule                        |
| 1   | Q61140-2 | Breast cancer anti-estrogen resistance protein 1    |
| 11  | Q8CCN5   | Breast carcinoma-amplified sequence 3 homolog       |
| 25  | P50136   | 2-oxoisovalerate dehydrogenase subunit alpha, mito  |
| 14  | Q6P3A8-2 | 2-oxoisovalerate dehydrogenase subunit beta, mitocl |
| 7   | O55028   | [3-methyl-2-oxobutanoate dehydrogenase [lipoamid    |
| 26  | Q8R016   | Bleomycin hydrolase                                 |
| 17  | Q9CY64   | Biliverdin reductase A                              |
| 70  | Q923D2   | Flavin reductase (NADPH)                            |
| 6   | P15327   | Bisphosphoglycerate mutase                          |
| 29  | Q9Z0S1   | 3(2),5-bisphosphate nucleotidase 1                  |
| 3   | Q8K3W0-4 | BRCA1-A complex subunit BRE                         |

|     |          |                                                     |
|-----|----------|-----------------------------------------------------|
| 1   | Q8K2Q7-2 | BRO1 domain-containing protein BROX                 |
| 1   | Q64152-2 | Transcription factor BTF3                           |
| 8   | P35991   | Tyrosine-protein kinase BTK                         |
| 26  | O35658   | Complement component 1 Q subcomponent-binding       |
| 206 | P01027   | Complement C3                                       |
| 40  | P08607   | C4b-binding protein                                 |
| 19  | P06684   | Complement C5                                       |
| 2   | P06683   | Complement component C9                             |
| 20  | P13634   | Carbonic anhydrase 1                                |
| 130 | P00920   | Carbonic anhydrase 2                                |
| 304 | P16015   | Carbonic anhydrase 3                                |
| 74  | Q06138   | Calcium-binding protein 39                          |
| 11  | Q9CXW3   | Calcyclin-binding protein                           |
| 11  | B2RQC6-2 | CAD protein                                         |
| 63  | P0DP28   | Calmodulin-3                                        |
| 128 | P14211   | Calreticulin                                        |
| 10  | O35887   | Calumenin                                           |
| 28  | Q91YS8   | Calcium/calmodulin-dependent protein kinase type 1  |
| 118 | Q6PHZ2-2 | Calcium/calmodulin-dependent protein kinase type II |
| 77  | Q923T9-3 | Calcium/calmodulin-dependent protein kinase type II |
| 4   | P49070   | Calcium signal-modulating cyclophilin ligand        |
| 265 | Q6ZQ38   | Cullin-associated NEDD8-dissociated protein 1       |
| 143 | P35564   | Calnexin                                            |
| 356 | P40124   | Adenylyl cyclase-associated protein 1               |
| 85  | Q9CYT6   | Adenylyl cyclase-associated protein 2               |
| 41  | P24452   | Macrophage-capping protein                          |
| 19  | O35350   | Calpain-1 catalytic subunit                         |
| 253 | O08529   | Calpain-2 catalytic subunit                         |
| 200 | O88456   | Calpain small subunit 1                             |
| 11  | Q60865   | Caprin-1                                            |
| 83  | P47754   | F-actin-capping protein subunit alpha-2             |
| 95  | P47757-2 | F-actin-capping protein subunit beta                |
| 10  | Q9CR86   | Calcium-regulated heat stable protein 1             |
| 52  | Q9CZ42-3 | ATP-dependent (S)-NAD(P)H-hydrate dehydratase       |
| 15  | Q9CZ42-2 | ATP-dependent (S)-NAD(P)H-hydrate dehydratase       |
| 6   | Q9WVG6-2 | Histone-arginine methyltransferase CARM1            |
| 1   | Q9ER72-2 | Cysteine--tRNA ligase, cytoplasmic                  |
| 2   | O89110   | Caspase-8                                           |
| 20  | O09165   | Calsequestrin-1                                     |
| 29  | P51125-3 | Calpastatin                                         |
| 38  | P24270   | Catalase                                            |

|     |          |                                                          |
|-----|----------|----------------------------------------------------------|
| 179 | P49817   | Caveolin-1                                               |
| 56  | Q9WVC3   | Caveolin-2                                               |
| 21  | Q8K354   | Carbonyl reductase [NADPH] 3                             |
| 3   | Q8CH18-3 | Cell division cycle and apoptosis regulator protein 1    |
| 10  | Q8VDP4   | Cell cycle and apoptosis regulator protein 2             |
| 16  | Q71RI9-2 | Kynurenine--oxoglutarate transaminase 3                  |
| 1   | Q3TC33-2 | Coiled-coil domain-containing protein 127                |
| 28  | Q9D024-2 | Coiled-coil domain-containing protein 47                 |
| 34  | Q8R2G6   | Coiled-coil domain-containing protein 80                 |
| 9   | Q8C3X2   | Coiled-coil domain-containing protein 90B, mitochondrion |
| 7   | Q8BGU5-2 | Cyclin-Y                                                 |
| 194 | P80314   | T-complex protein 1 subunit beta                         |
| 187 | P80318   | T-complex protein 1 subunit gamma                        |
| 117 | P80315   | T-complex protein 1 subunit delta                        |
| 155 | P80316   | T-complex protein 1 subunit epsilon                      |
| 131 | P80313   | T-complex protein 1 subunit eta                          |
| 85  | P42932   | T-complex protein 1 subunit theta                        |
| 74  | Q8R422   | CD109 antigen                                            |
| 7   | O35566   | CD151 antigen                                            |
| 7   | Q2VLH6   | Scavenger receptor cysteine-rich type 1 protein M13      |
| 73  | O54901   | OX-2 membrane glycoprotein                               |
| 18  | Q9JLQ0   | CD2-associated protein                                   |
| 12  | Q64314-2 | Hematopoietic progenitor cell antigen CD34               |
| 91  | Q08857   | Platelet glycoprotein 4                                  |
| 13  | P15379-2 | CD44 antigen                                             |
| 53  | Q61735   | Leukocyte surface antigen CD47                           |
| 64  | P35762   | CD81 antigen                                             |
| 96  | P40240   | CD9 antigen                                              |
| 20  | Q9Z0M6-2 | CD97 antigen                                             |
| 14  | Q8VCN6   | CD99 antigen                                             |
| 35  | Q61081   | Hsp90 co-chaperone Cdc37                                 |
| 140 | P60766   | Cell division control protein 42 homolog                 |
| 44  | Q7TT50   | Serine/threonine-protein kinase MRCK beta                |
| 8   | P97326   | Cadherin-6                                               |
| 3   | Q8VDP6   | CDP-diacylglycerol--inositol 3-phosphatidyltransferase   |
| 2   | Q69ZA1-2 | Cyclin-dependent kinase 13                               |
| 17  | P49615   | Cyclin-dependent-like kinase 5                           |
| 16  | Q99L43   | Phosphatidate cytidyltransferase 2                       |
| 26  | Q9Z0H4-2 | CUGBP Elav-like family member 2                          |
| 48  | Q9CXS4   | Centromere protein V                                     |
| 103 | P23953   | Carboxylesterase 1C                                      |



|     |          |                                                               |
|-----|----------|---------------------------------------------------------------|
| 275 | Q8VCT4   | Carboxylesterase 1D                                           |
| 37  | P04186   | Complement factor B                                           |
| 4   | P03953-2 | Complement factor D                                           |
| 141 | P06909   | Complement factor H                                           |
| 7   | Q61129   | Complement factor I                                           |
| 262 | P18760   | Cofilin-1                                                     |
| 32  | P45591   | Cofilin-2                                                     |
| 2   | Q9CRB9   | MICOS complex subunit Mic19                                   |
| 10  | Q91VN4   | MICOS complex subunit Mic25                                   |
| 14  | Q9CQ10   | Charged multivesicular body protein 3                         |
| 13  | Q9D8B3   | Charged multivesicular body protein 4b                        |
| 1   | Q99LL3   | Carbohydrate sulfotransferase 12                              |
| 4   | Q9CY57-3 | Chromatin target of PRMT1 protein                             |
| 19  | Q91WS0   | CDGSH iron-sulfur domain-containing protein 1                 |
| 349 | Q04447   | Creatine kinase B-type                                        |
| 51  | P07310   | Creatine kinase M-type                                        |
| 14  | Q80TV8-2 | CLIP-associating protein 1                                    |
| 2   | Q99LI2   | Chloride channel CLIC-like protein 1                          |
| 5   | P49300   | C-type lectin domain family 10 member A                       |
| 25  | P43025   | Tetranectin                                                   |
| 103 | Q9Z1Q5   | Chloride intracellular channel protein 1                      |
| 344 | Q9QYB1   | Chloride intracellular channel protein 4                      |
| 13  | Q99KN9-2 | Clathrin interactor 1                                         |
| 12  | Q8BXA5   | Cleft lip and palate transmembrane protein 1-like protein     |
| 16  | Q6IRU5-2 | Clathrin light chain B                                        |
| 991 | Q68FD5   | Clathrin heavy chain 1                                        |
| 94  | Q06890   | Clusterin                                                     |
| 37  | Q8R4N0   | Citrate lyase subunit beta-like protein, mitochondrial        |
| 139 | P21844   | Chymase                                                       |
| 42  | Q9DBP5   | UMP-CMP kinase                                                |
| 16  | P53996-2 | Cellular nucleic acid-binding protein                         |
| 52  | Q9D1A2   | Cytosolic non-specific dipeptidase                            |
| 111 | Q08093   | Calponin-2                                                    |
| 11  | P16330-2 | 2,3-cyclic-nucleotide 3-phosphodiesterase                     |
| 2   | Q9QXT0   | Protein canopy homolog 2                                      |
| 4   | Q8BQ47   | Protein canopy homolog 4                                      |
| 4   | Q9D2R6   | Cytochrome c oxidase assembly factor 3 homolog, mitochondrial |
| 5   | Q9DBL7   | Bifunctional coenzyme A synthase                              |
| 41  | Q60847-4 | Collagen alpha-1(XII) chain                                   |
| 716 | P11087   | Collagen alpha-1(I) chain                                     |
| 547 | Q01149   | Collagen alpha-2(I) chain                                     |

|     |          |                                                       |
|-----|----------|-------------------------------------------------------|
| 45  | P28481-2 | Collagen alpha-1(II) chain                            |
| 39  | P08121   | Collagen alpha-1(III) chain                           |
| 472 | P02463   | Collagen alpha-1(IV) chain                            |
| 423 | P08122   | Collagen alpha-2(IV) chain                            |
| 2   | Q9QZR9   | Collagen alpha-4(IV) chain                            |
| 112 | O88207-2 | Collagen alpha-1(V) chain                             |
| 93  | Q3U962   | Collagen alpha-2(V) chain                             |
| 63  | A6H584   | Collagen alpha-5(VI) chain                            |
| 23  | Q8K297   | Procollagen galactosyltransferase 1                   |
| 13  | Q63829   | COMM domain-containing protein 3                      |
| 7   | Q9CQ02   | COMM domain-containing protein 4                      |
| 16  | Q8K2Q0   | COMM domain-containing protein 9                      |
| 30  | O88587-2 | Catechol O-methyltransferase                          |
| 11  | Q8BIG7   | Catechol O-methyltransferase domain-containing prc    |
| 131 | Q8CIE6   | Coatomer subunit alpha                                |
| 88  | Q9JIF7   | Coatomer subunit beta                                 |
| 26  | O55029   | Coatomer subunit beta                                 |
| 48  | O89079   | Coatomer subunit epsilon                              |
| 109 | Q9QZE5   | Coatomer subunit gamma-1                              |
| 7   | Q9QXK3-4 | Coatomer subunit gamma-2                              |
| 80  | P61202   | COP9 signalosome complex subunit 2                    |
| 26  | O88543   | COP9 signalosome complex subunit 3                    |
| 47  | O88544   | COP9 signalosome complex subunit 4                    |
| 3   | O35864   | COP9 signalosome complex subunit 5                    |
| 7   | O88545   | COP9 signalosome complex subunit 6                    |
| 30  | Q9CZ04   | COP9 signalosome complex subunit 7a                   |
| 15  | P61924   | Coatomer subunit zeta-1                               |
| 1   | Q3THF9-2 | Coenzyme Q-binding protein COQ10 homolog B, mitc      |
| 12  | Q8R1S0   | Ubiquinone biosynthesis monooxygenase COQ6, mitc      |
| 26  | Q8K1Z0   | Ubiquinone biosynthesis protein COQ9, mitochondria    |
| 8   | O89053   | Coronin-1A                                            |
| 59  | Q9WUM3   | Coronin-1B                                            |
| 186 | Q9WUM4   | Coronin-1C                                            |
| 8   | Q9CQI6   | Coactosin-like protein                                |
| 77  | P19783   | Cytochrome c oxidase subunit 4 isoform 1, mitochondri |
| 197 | P12787   | Cytochrome c oxidase subunit 5A, mitochondrial        |
| 95  | P19536   | Cytochrome c oxidase subunit 5B, mitochondrial        |
| 92  | P43024   | Cytochrome c oxidase subunit 6A1, mitochondrial       |
| 77  | P56391   | Cytochrome c oxidase subunit 6B1                      |
| 37  | Q9CPQ1   | Cytochrome c oxidase subunit 6C                       |
| 19  | P56392   | Cytochrome c oxidase subunit 7A1, mitochondrial       |

|     |          |                                                       |
|-----|----------|-------------------------------------------------------|
| 48  | P48771   | Cytochrome c oxidase subunit 7A2, mitochondrial       |
| 8   | P17665   | Cytochrome c oxidase subunit 7C, mitochondrial        |
| 75  | Q61147   | Ceruloplasmin                                         |
| 156 | P15089   | Mast cell carboxypeptidase A                          |
| 21  | Q00493   | Carboxypeptidase E                                    |
| 69  | Q8C166   | Copine-1                                              |
| 14  | P59108   | Copine-2                                              |
| 61  | Q8BT60   | Copine-3                                              |
| 3   | P36552   | Oxygen-dependent coproporphyrinogen-III oxidase, r    |
| 3   | Q8BFS6-4 | Serine/threonine-protein phosphatase CPPED1           |
| 22  | Q9WVJ3   | Carboxypeptidase Q                                    |
| 27  | Q6NVF9   | Cleavage and polyadenylation specificity factor subur |
| 18  | Q8BTV2-3 | Cleavage and polyadenylation specificity factor subur |
| 30  | P97742   | Carnitine O-palmitoyltransferase 1, liver isoform     |
| 49  | Q924X2   | Carnitine O-palmitoyltransferase 1, muscle isoform    |
| 96  | P52825   | Carnitine O-palmitoyltransferase 2, mitochondrial     |
| 13  | Q64735-2 | Complement component receptor 1-like protein          |
| 55  | P47934   | Carnitine O-acetyltransferase                         |
| 7   | Q91XD7   | Cysteine-rich with EGF-like domain protein 1          |
| 98  | P63254   | Cysteine-rich protein 1                               |
| 150 | Q9DCT8   | Cysteine-rich protein 2                               |
| 27  | Q64010   | Adapter molecule crk                                  |
| 1   | P47941   | Crk-like protein                                      |
| 44  | P23927   | Alpha-crystallin B chain                              |
| 25  | Q99KP3   | Lambda-crystallin homolog                             |
| 12  | P47199   | Quinone oxidoreductase                                |
| 369 | Q9CZU6   | Citrate synthase, mitochondrial                       |
| 71  | Q9DBE0   | Cysteine sulfinic acid decarboxylase                  |
| 36  | Q9ERK4   | Exportin-2                                            |
| 5   | P41241   | Tyrosine-protein kinase CSK                           |
| 20  | Q8BK63-2 | Casein kinase I isoform alpha                         |
| 44  | Q60737   | Casein kinase II subunit alpha                        |
| 10  | P67871   | Casein kinase II subunit beta                         |
| 237 | P97315   | Cysteine and glycine-rich protein 1                   |
| 219 | P97314   | Cysteine and glycine-rich protein 2                   |
| 3   | P21460   | Cystatin-C                                            |
| 30  | Q62426   | Cystatin-B                                            |
| 11  | Q8BIQ5   | Cleavage stimulation factor subunit 2                 |
| 25  | O88712-2 | C-terminal-binding protein 1                          |
| 1   | Q61164   | Transcriptional repressor CTCF                        |
| 62  | P26231   | Catenin alpha-1                                       |

|     |          |                                                    |
|-----|----------|----------------------------------------------------|
| 15  | Q61301-2 | Catenin alpha-2                                    |
| 5   | Q65CL1   | Catenin alpha-3                                    |
| 17  | O88327   | Alpha-catenin                                      |
| 51  | Q02248   | Catenin beta-1                                     |
| 7   | Q9CWL8   | Beta-catenin-like protein 1                        |
| 53  | P30999-2 | Catenin delta-1                                    |
| 59  | P10605   | Cathepsin B                                        |
| 136 | P18242   | Cathepsin D                                        |
| 15  | P49935   | Pro-cathepsin H                                    |
| 23  | Q60598   | Src substrate cortactin                            |
| 2   | Q99LJ0   | CTTNBP2 N-terminal-like protein                    |
| 13  | Q9WTX6   | Cullin-1                                           |
| 21  | Q9JLV5   | Cullin-3                                           |
| 24  | Q3TCH7   | Cullin-4A                                          |
| 11  | Q9D5V5   | Cullin-5                                           |
| 68  | Q9CQ89   | Protein CutA                                       |
| 2   | Q9D8X1   | Copper homeostasis protein cutC homolog            |
| 9   | P40224-1 | Stromal cell-derived factor 1                      |
| 20  | P56395   | Cytochrome b5                                      |
| 12  | Q9CQX2   | Cytochrome b5 type B                               |
| 22  | Q9DB73   | NADH-cytochrome b5 reductase 1                     |
| 494 | Q9DCN2-2 | NADH-cytochrome b5 reductase 3                     |
| 20  | Q3TYS2   | Cytochrome b-245 chaperone 1                       |
| 87  | Q9D0M3-2 | Cytochrome c1, heme protein, mitochondrial         |
| 72  | P62897   | Cytochrome c, somatic                              |
| 104 | Q7TMB8-2 | Cytoplasmic FMR1-interacting protein 1             |
| 39  | Q9CX80   | Cytoglobin                                         |
| 11  | Q8BKE6   | Cytochrome P450 20A1                               |
| 2   | P33267   | Cytochrome P450 2F2                                |
| 2   | Q64462   | Cytochrome P450 4B1                                |
| 99  | Q9D172   | ES1 protein homolog, mitochondrial                 |
| 6   | Q8BPM0-2 | Disheveled-associated activator of morphogenesis 1 |
| 10  | P98078-3 | Disabled homolog 2                                 |
| 94  | Q62165   | Dystroglycan                                       |
| 91  | Q922B2   | Aspartate--tRNA ligase, cytoplasmic                |
| 2   | Q9JII5-2 | DAZ-associated protein 1                           |
| 69  | P31786   | Acyl-CoA-binding protein                           |
| 29  | Q62418-3 | Drebrin-like protein                               |
| 90  | P53395   | Lipoamide acyltransferase component of branched-cl |
| 951 | P28654   | Decorin                                            |
| 19  | Q9DAR7   | m7GpppX diphosphatase                              |

|     |          |                                                      |
|-----|----------|------------------------------------------------------|
| 62  | O08788-2 | Dynactin subunit 1                                   |
| 83  | Q99KJ8   | Dynactin subunit 2                                   |
| 13  | Q9Z0Y1   | Dynactin subunit 3                                   |
| 2   | Q9QZB9   | Dynactin subunit 5                                   |
| 84  | Q99LD8   | N(G),N(G)-dimethylarginine dimethylaminohydrolase    |
| 57  | Q3U1J4   | DNA damage-binding protein 1                         |
| 2   | Q80Y98   | Phospholipase DDHD2                                  |
| 77  | O54734   | Dolichyl-diphosphooligosaccharide--protein glycosylt |
| 3   | Q80WW9   | DDR GK domain-containing protein 1                   |
| 119 | O35215   | D-dopachrome decarboxylase                           |
| 90  | Q91VR5   | ATP-dependent RNA helicase DDX1                      |
| 24  | Q501J6   | Probable ATP-dependent RNA helicase DDX17            |
| 6   | Q9JIK5   | Nucleolar RNA helicase 2                             |
| 16  | Q9QY15-2 | ATP-dependent RNA helicase DDX25                     |
| 114 | Q9Z1N5   | Spliceosome RNA helicase Ddx39b                      |
| 112 | Q62167   | ATP-dependent RNA helicase DDX3X                     |
| 6   | Q62095   | ATP-dependent RNA helicase DDX3Y                     |
| 4   | Q810A7   | ATP-dependent RNA helicase DDX42                     |
| 110 | Q61656   | Probable ATP-dependent RNA helicase DDX5             |
| 9   | Q99MJ9   | ATP-dependent RNA helicase DDX50                     |
| 16  | P54823   | Probable ATP-dependent RNA helicase DDX6             |
| 197 | Q9CQ62   | 2,4-dienoyl-CoA reductase, mitochondrial             |
| 29  | Q7TNV0   | Protein DEK                                          |
| 17  | Q99J56   | Derlin-1                                             |
| 23  | Q9DBB8   | Trans-1,2-dihydrobenzene-1,2-diol dehydrogenase      |
| 41  | Q99L04   | Dehydrogenase/reductase SDR family member 1          |
| 5   | Q99J47-2 | Dehydrogenase/reductase SDR family member 7B         |
| 14  | O35286   | Pre-mRNA-splicing factor ATP-dependent RNA helica    |
| 3   | Q6PGC1   | ATP-dependent RNA helicase Dhx29                     |
| 92  | O70133   | ATP-dependent RNA helicase A                         |
| 11  | O08808   | Protein diaphanous homolog 1                         |
| 4   | Q9ESX5   | H/ACA ribonucleoprotein complex subunit 4            |
| 224 | Q8BMF4   | Dihydrolipoyllysine-residue acetyltransferase compor |
| 169 | O08749   | Dihydrolipoyl dehydrogenase, mitochondrial           |
| 78  | Q9D2G2   | Dihydrolipoyllysine-residue succinyltransferase comp |
| 797 | P11531   | Dystrophin                                           |
| 23  | P54265-4 | Myotonin-protein kinase                              |
| 13  | P63037   | DnaJ homolog subfamily A member 1                    |
| 15  | Q9QYJ0   | DnaJ homolog subfamily A member 2                    |
| 4   | Q99M87-3 | DnaJ homolog subfamily A member 3, mitochondrial     |
| 51  | Q9D832   | DnaJ homolog subfamily B member 4                    |

|     |          |                                                         |
|-----|----------|---------------------------------------------------------|
| 10  | Q9DC23   | DnaJ homolog subfamily C member 10                      |
| 16  | Q5U458   | DnaJ homolog subfamily C member 11                      |
| 11  | Q91YW3   | DnaJ homolog subfamily C member 3                       |
| 3   | P39053-5 | Dynamamin-1                                             |
| 178 | Q8K1M6-3 | Dynamamin-1-like protein                                |
| 115 | P39054-2 | Dynamamin-2                                             |
| 12  | Q8R1A4-2 | Dedicator of cytokinesis protein 7                      |
| 206 | P31428   | Dipeptidase 1                                           |
| 25  | Q99KK7   | Dipeptidyl peptidase 3                                  |
| 6   | Q9ET22   | Dipeptidyl peptidase 2                                  |
| 58  | Q99LT0   | Protein dpy-30 homolog                                  |
| 350 | O08553   | Dihydropyrimidinase-related protein 2                   |
| 9   | Q9D6N5   | Dr1-associated corepressor                              |
| 10  | Q91ZU6   | Dystonin                                                |
| 577 | Q9R0P5   | Destrin                                                 |
| 4   | Q8BHA3-2 | Probable D-tyrosyl-tRNA(Tyr) deacylase 2                |
| 69  | Q9D2N4-2 | Dystrobrevin alpha                                      |
| 11  | Q8K4T5   | Dual specificity protein phosphatase 19                 |
| 70  | Q9D7X3   | Dual specificity protein phosphatase 3                  |
| 998 | Q9JHU4   | Cytoplasmic dynein 1 heavy chain 1                      |
| 10  | O88487   | Cytoplasmic dynein 1 intermediate chain 2               |
| 36  | Q8R1Q8   | Cytoplasmic dynein 1 light intermediate chain 1         |
| 69  | P63168   | Dynein light chain 1, cytoplasmic                       |
| 20  | P62627   | Dynein light chain roadblock-type 1                     |
| 6   | P51807   | Dynein light chain Tctex-type 1                         |
| 13  | P56387   | Dynein light chain Tctex-type 3                         |
| 51  | O35459   | Delta(3,5)-Delta(2,4)-dienoyl-CoA isomerase, mitochc    |
| 3   | Q3TLP5-2 | Enoyl-CoA hydratase domain-containing protein 2, m      |
| 113 | Q8BH95   | Enoyl-CoA hydratase, mitochondrial                      |
| 98  | P42125   | Enoyl-CoA delta isomerase 1, mitochondrial              |
| 31  | Q9WUR2-2 | Enoyl-CoA delta isomerase 2, mitochondrial              |
| 28  | Q61508   | Extracellular matrix protein 1                          |
| 1   | Q9QZH6   | Evolutionarily conserved signaling intermediate in To   |
| 514 | P10126   | Elongation factor 1-alpha 1                             |
| 61  | O70251   | Elongation factor 1-beta                                |
| 50  | P57776   | Elongation factor 1-delta                               |
| 4   | Q9D1M4   | Eukaryotic translation elongation factor 1 epsilon-1    |
| 100 | Q9D8N0   | Elongation factor 1-gamma                               |
| 571 | P58252   | Elongation factor 2                                     |
| 163 | Q8BPB5   | EGF-containing fibulin-like extracellular matrix protei |
| 85  | Q9WVJ9   | EGF-containing fibulin-like extracellular matrix protei |

|      |          |                                                          |
|------|----------|----------------------------------------------------------|
| 28   | Q9D4J1   | EF-hand domain-containing protein D1                     |
| 6    | Q8BG67   | Protein EFR3 homolog A                                   |
| 27   | O08810   | 116 kDa U5 small nuclear ribonucleoprotein component     |
| 19   | Q01279   | Epidermal growth factor receptor                         |
| 14   | Q99MS7-4 | EH domain-binding protein 1-like protein 1               |
| 171  | Q9WVK4   | EH domain-containing protein 1                           |
| 1041 | Q8BH64   | EH domain-containing protein 2                           |
| 18   | Q9QXY6   | EH domain-containing protein 3                           |
| 275  | Q9EQP2   | EH domain-containing protein 4                           |
| 14   | Q6ZWX6   | Eukaryotic translation initiation factor 2 subunit 1     |
| 39   | Q9Z0N1   | Eukaryotic translation initiation factor 2 subunit 3, X- |
| 98   | P23116   | Eukaryotic translation initiation factor 3 subunit A     |
| 23   | Q8JZQ9   | Eukaryotic translation initiation factor 3 subunit B     |
| 39   | Q8R1B4   | Eukaryotic translation initiation factor 3 subunit C     |
| 13   | O70194   | Eukaryotic translation initiation factor 3 subunit D     |
| 43   | P60229   | Eukaryotic translation initiation factor 3 subunit E     |
| 71   | Q9DCH4   | Eukaryotic translation initiation factor 3 subunit F     |
| 9    | Q9Z1D1   | Eukaryotic translation initiation factor 3 subunit G     |
| 8    | Q91WK2   | Eukaryotic translation initiation factor 3 subunit H     |
| 16   | Q3UGC7   | Eukaryotic translation initiation factor 3 subunit J-A   |
| 14   | Q9DBZ5-2 | Eukaryotic translation initiation factor 3 subunit K     |
| 44   | Q99JX4   | Eukaryotic translation initiation factor 3 subunit M     |
| 160  | P60843   | Eukaryotic initiation factor 4A-I                        |
| 26   | P10630   | Eukaryotic initiation factor 4A-II                       |
| 16   | Q91VC3   | Eukaryotic initiation factor 4A-III                      |
| 27   | Q8BGD9   | Eukaryotic translation initiation factor 4B              |
| 21   | P63073   | Eukaryotic translation initiation factor 4E              |
| 49   | Q6NZJ6-2 | Eukaryotic translation initiation factor 4 gamma 1       |
| 19   | Q62448-2 | Eukaryotic translation initiation factor 4 gamma 2       |
| 13   | Q9WUK2-2 | Eukaryotic translation initiation factor 4H              |
| 46   | P59325   | Eukaryotic translation initiation factor 5               |
| 126  | P63242   | Eukaryotic translation initiation factor 5A-1            |
| 53   | P70372   | ELAV-like protein 1                                      |
| 17   | Q9JLJ5   | Elongation of very long chain fatty acids protein 1      |
| 23   | Q8C7X2-2 | ER membrane protein complex subunit 1                    |
| 12   | O70378   | ER membrane protein complex subunit 8                    |
| 25   | O08579   | Emerin                                                   |
| 113  | Q7TNG5   | Echinoderm microtubule-associated protein-like 2         |
| 125  | Q03173-6 | Protein enabled homolog                                  |
| 117  | Q8C522   | Endonuclease domain-containing 1 protein                 |
| 475  | P17182   | Alpha-enolase                                            |

|     |          |                                                       |
|-----|----------|-------------------------------------------------------|
| 2   | P17183   | Gamma-enolase                                         |
| 16  | P21550   | Beta-enolase                                          |
| 53  | P16406   | Glutamyl aminopeptidase                               |
| 13  | P06802-2 | Ectonucleotide pyrophosphatase/phosphodiesterase      |
| 39  | Q6DYE8   | Ectonucleotide pyrophosphatase/phosphodiesterase      |
| 12  | Q8BTJ4-2 | Bis(5-adenosyl)-triphosphatase enpp4                  |
| 140 | P55772   | Ectonucleoside triphosphate diphosphohydrolase 1      |
| 198 | O55026   | Ectonucleoside triphosphate diphosphohydrolase 2      |
| 12  | P48193-2 | Protein 4.1                                           |
| 24  | O70318   | Band 4.1-like protein 2                               |
| 309 | Q9D379   | Epoxide hydrolase 1                                   |
| 23  | P34914   | Bifunctional epoxide hydrolase 2                      |
| 14  | Q80VP1   | Epsin-1                                               |
| 4   | Q8CHU3-2 | Epsin-2                                               |
| 9   | Q8ROW0   | Epiplakin                                             |
| 116 | Q8CGC7   | Bifunctional glutamate/proline--tRNA ligase           |
| 12  | P42567   | Epidermal growth factor receptor substrate 15         |
| 3   | Q99K30   | Epidermal growth factor receptor kinase substrate 8-  |
| 17  | Q9EQH2   | Endoplasmic reticulum aminopeptidase 1                |
| 7   | Q80TH2-1 | Protein LAP2                                          |
| 15  | Q9DC16   | Endoplasmic reticulum-Golgi intermediate compartm     |
| 31  | P57759   | Endoplasmic reticulum resident protein 29             |
| 47  | Q9D1Q6   | Endoplasmic reticulum resident protein 44             |
| 155 | Q9R0P3   | S-formylglutathione hydrolase                         |
| 333 | Q3U7R1   | Extended synaptotagmin-1                              |
| 5   | Q8BWY3   | Eukaryotic peptide chain release factor subunit 1     |
| 290 | Q99LC5   | Electron transfer flavoprotein subunit alpha, mitocho |
| 149 | Q9DCW4   | Electron transfer flavoprotein subunit beta           |
| 78  | Q921G7   | Electron transfer flavoprotein-ubiquinone oxidoreduc  |
| 53  | Q9DCM0   | Persulfide dioxygenase ETHE1, mitochondrial           |
| 6   | Q9D4H1   | Exocyst complex component 2                           |
| 11  | A6H5Z3   | Exocyst complex component 6B                          |
| 114 | Q8BH61   | Coagulation factor XIII A chain                       |
| 39  | P19221   | Prothrombin                                           |
| 28  | P11404   | Fatty acid-binding protein, heart                     |
| 114 | P04117   | Fatty acid-binding protein, adipocyte                 |
| 17  | Q3TDN2   | FAS-associated factor 2                               |
| 56  | P35505   | Fumarylacetoacetase                                   |
| 28  | Q9D281   | Protein Noxp20                                        |
| 9   | Q6A0A9   | Constitutive coactivator of PPAR-gamma-like protein   |
| 214 | Q3UW53   | Protein Niban                                         |



|      |          |                                            |
|------|----------|--------------------------------------------|
| 42   | Q8R1F1   | Niban-like protein 1                       |
| 34   | Q9D6U8   | Protein FAM162A                            |
| 7    | Q3TCJ1   | BRISC complex subunit Abro1                |
| 17   | Q9CYH2   | Redox-regulatory protein FAM213A           |
| 18   | Q9WTJ8   | Protein FAM50B                             |
| 9    | Q3TJZ6   | Protein FAM98A                             |
| 6    | Q80VD1   | Protein FAM98B                             |
| 44   | Q8C0C7   | Phenylalanine--tRNA ligase alpha subunit   |
| 49   | Q9WUA2   | Phenylalanine--tRNA ligase beta subunit    |
| 808  | P19096   | Fatty acid synthase                        |
| 17   | P62862   | 40S ribosomal protein S30                  |
| 30   | P35550   | rRNA 2-O-methyltransferase fibrillarin     |
| 553  | Q71FD7   | Filamin-binding LIM protein 1              |
| 19   | Q08879   | Fibulin-1                                  |
| 7    | Q08879-2 | Fibulin-1                                  |
| 133  | P37889-2 | Fibulin-2                                  |
| 875  | Q9WVH9   | Fibulin-5                                  |
| 2583 | Q61554   | Fibrillin-1                                |
| 10   | Q61555   | Fibrillin-2                                |
| 12   | Q80UW2   | F-box only protein 2                       |
| 14   | Q8BJL1   | F-box only protein 30                      |
| 6    | Q9QZN4   | F-box only protein 6                       |
| 6    | Q61559   | IgG receptor FcRn large subunit p51        |
| 5    | Q3UQN2   | F-BAR domain only protein 2                |
| 13   | Q920E5   | Farnesyl pyrophosphate synthase            |
| 8    | Q8K1B8   | Fermitin family homolog 3                  |
| 2    | Q9QXC1   | Fetuin-B                                   |
| 319  | E9PV24-2 | Fibrinogen alpha chain                     |
| 464  | Q8K0E8   | Fibrinogen beta chain                      |
| 19   | P61148   | Fibroblast growth factor 1                 |
| 437  | Q8VCM7   | Fibrinogen gamma chain                     |
| 1    | P12804   | Fibroleukin                                |
| 255  | P97807-2 | Fumarate hydratase, mitochondrial          |
| 425  | P97447   | Four and a half LIM domains protein 1      |
| 43   | Q9R059   | Four and a half LIM domains protein 3      |
| 54   | Q6P6L0-3 | Filamin A-interacting protein 1-like       |
| 62   | Q9CQ92   | Mitochondrial fission 1 protein            |
| 27   | Q61576   | Peptidyl-prolyl cis-trans isomerase FKBP10 |
| 10   | P45878   | Peptidyl-prolyl cis-trans isomerase FKBP2  |
| 4    | Q62446   | Peptidyl-prolyl cis-trans isomerase FKBP3  |
| 15   | P30416   | Peptidyl-prolyl cis-trans isomerase FKBP4  |

|      |           |                                                         |
|------|-----------|---------------------------------------------------------|
| 18   | Q9Z247    | Peptidyl-prolyl cis-trans isomerase FKBP9               |
| 112  | Q9JJ28    | Protein flightless-1 homolog                            |
| 5399 | Q8BTM8    | Filamin-A                                               |
| 214  | Q80X90    | Filamin-B                                               |
| 45   | O08917    | Flotillin-1                                             |
| 59   | Q60634-3  | Flotillin-2                                             |
| 5    | Q6ZPF4-2  | Formin-like protein 3                                   |
| 69   | P50285    | Dimethylaniline monooxygenase [N-oxide-forming] 1       |
| 443  | Q8K213    | Dimethylaniline monooxygenase [N-oxide-forming] 2       |
| 27   | P97501    | Dimethylaniline monooxygenase [N-oxide-forming] 3       |
| 97   | P50608    | Fibromodulin                                            |
| 11   | P35922-11 | Fragile X mental retardation protein 1 homolog          |
| 1617 | P11276    | Fibronectin                                             |
| 7    | Q61239    | Protein farnesyltransferase/geranylgeranyltransferase   |
| 7    | O35409    | Glutamate carboxypeptidase 2                            |
| 4    | E9Q819    | Protein furry homolog                                   |
| 25   | Q62356    | Follistatin-related protein 1                           |
| 88   | P09528    | Ferritin heavy chain                                    |
| 9    | Q9D6K8    | FUN14 domain-containing protein 2                       |
| 23   | P56959    | RNA-binding protein FUS                                 |
| 16   | Q61584-2  | Fragile X mental retardation syndrome-related protein 1 |
| 57   | P97855    | Ras GTPase-activating protein-binding protein 1         |
| 16   | P97379-2  | Ras GTPase-activating protein-binding protein 2         |
| 90   | Q00612    | Glucose-6-phosphate 1-dehydrogenase X                   |
| 12   | P70699    | Lysosomal alpha-glucosidase                             |
| 1    | Q9DCD6    | Gamma-aminobutyric acid receptor-associated protein 1   |
| 10   | Q99KY4-2  | Cyclin-G-associated kinase                              |
| 28   | Q9R0N0    | Galactokinase                                           |
| 15   | Q8K157    | Aldose 1-epimerase                                      |
| 17   | O35969    | Guanidinoacetate N-methyltransferase                    |
| 156  | Q8BHN3    | Neutral alpha-glucosidase AB                            |
| 978  | P16858    | Glyceraldehyde-3-phosphate dehydrogenase                |
| 2    | Q9CZD3    | Glycine--tRNA ligase                                    |
| 20   | Q64737    | Trifunctional purine biosynthetic protein adenosine-3   |
| 27   | O55126    | Protein NipSnap homolog 2                               |
| 17   | Q9D6Y9    | 1,4-alpha-glucan-branching enzyme                       |
| 31   | Q9Z0E6    | Interferon-induced guanylate-binding protein 2          |
| 147  | P21614    | Vitamin D-binding protein                               |
| 12   | O88986    | 2-amino-3-ketobutyrate coenzyme A ligase, mitochondrial |
| 8    | Q60759    | Glutaryl-CoA dehydrogenase, mitochondrial               |
| 35   | E9PVA8    | eIF-2-alpha kinase activator GCN1                       |

|     |          |                                                      |
|-----|----------|------------------------------------------------------|
| 157 | P50396   | Rab GDP dissociation inhibitor alpha                 |
| 334 | Q61598   | Rab GDP dissociation inhibitor beta                  |
| 2   | Q9QYC7   | Vitamin K-dependent gamma-carboxylase                |
| 1   | Q9D7M1   | Glucose-induced degradation protein 8 homolog        |
| 3   | Q99JY3   | GTPase IMAP family member 4                          |
| 16  | Q68FF6   | ARF GTPase-activating protein GIT1                   |
| 7   | Q9JLQ2   | ARF GTPase-activating protein GIT2                   |
| 61  | Q61543   | Golgi apparatus protein 1                            |
| 131 | Q9CPU0   | Lactoylglutathione lyase                             |
| 40  | Q9CPV4-2 | Glyoxalase domain-containing protein 4               |
| 44  | Q9QUH0   | Glutaredoxin-1                                       |
| 11  | Q9JL62   | Glycolipid transfer protein                          |
| 321 | P26443   | Glutamate dehydrogenase 1, mitochondrial             |
| 29  | P15105   | Glutamine synthetase                                 |
| 12  | Q922P9   | Putative oxidoreductase GLYR1                        |
| 8   | Q9CQI3   | Glia maturation factor beta                          |
| 21  | Q922H4   | Mannose-1-phosphate guanyltransferase alpha          |
| 29  | Q8BTZ7   | Mannose-1-phosphate guanyltransferase beta           |
| 4   | Q3THK7   | GMP synthase [glutamine-hydrolyzing]                 |
| 70  | P21278   | Guanine nucleotide-binding protein subunit alpha-11  |
| 12  | P27601   | Guanine nucleotide-binding protein subunit alpha-13  |
| 12  | B2RSH2   | Guanine nucleotide-binding protein G(i) subunit alph |
| 194 | P08752   | Guanine nucleotide-binding protein G(i) subunit alph |
| 35  | P18872-2 | Guanine nucleotide-binding protein G(o) subunit alph |
| 9   | P18872   | Guanine nucleotide-binding protein G(o) subunit alph |
| 115 | P21279   | Guanine nucleotide-binding protein G(q) subunit alph |
| 64  | P63094-2 | Guanine nucleotide-binding protein G(s) subunit alph |
| 59  | P62874   | Guanine nucleotide-binding protein G(I)/G(S)/G(T) su |
| 134 | P62880   | Guanine nucleotide-binding protein G(I)/G(S)/G(T) su |
| 107 | P68040   | Guanine nucleotide-binding protein subunit beta-2-li |
| 9   | P29387   | Guanine nucleotide-binding protein subunit beta-4    |
| 5   | Q9CRC9-2 | Glucosamine-6-phosphate isomerase 2                  |
| 12  | Q9JK38   | Glucosamine 6-phosphate N-acetyltransferase          |
| 8   | Q921M4-2 | Golgin subfamily A member 2                          |
| 16  | Q99JX3-2 | Golgi reassembly-stacking protein 2                  |
| 7   | O35166   | Golgi SNAP receptor complex member 2                 |
| 273 | P05202   | Aspartate aminotransferase, mitochondrial            |
| 11  | O08742   | Platelet glycoprotein V                              |
| 6   | P51655   | Glypican-4                                           |
| 160 | P13707   | Glycerol-3-phosphate dehydrogenase [NAD(+)], cytoϕ   |
| 39  | Q3ULJ0-2 | Glycerol-3-phosphate dehydrogenase 1-like protein    |

|     |          |                                                          |
|-----|----------|----------------------------------------------------------|
| 264 | Q64521   | Glycerol-3-phosphate dehydrogenase, mitochondrial        |
| 659 | P06745   | Glucose-6-phosphate isomerase                            |
| 1   | Q99P91   | Transmembrane glycoprotein NMB                           |
| 10  | Q99LD4   | COP9 signalosome complex subunit 1                       |
| 208 | P11352   | Glutathione peroxidase 1                                 |
| 148 | P46412   | Glutathione peroxidase 3                                 |
| 7   | O70325-2 | Phospholipid hydroperoxide glutathione peroxidase,       |
| 9   | Q99LJ6   | Glutathione peroxidase 7                                 |
| 34  | Q60631   | Growth factor receptor-bound protein 2                   |
| 94  | Q91Z53   | Glyoxylate reductase/hydroxypyruvate reductase           |
| 49  | P28798   | Granulins                                                |
| 13  | Q99LP6   | GrpE protein homolog 1, mitochondrial                    |
| 1   | Q2NL51   | Glycogen synthase kinase-3 alpha                         |
| 16  | Q9WV60   | Glycogen synthase kinase-3 beta                          |
| 378 | P13020   | Gelsolin                                                 |
| 11  | P13020-2 | Gelsolin                                                 |
| 25  | P47791-2 | Glutathione reductase, mitochondrial                     |
| 18  | P51855   | Glutathione synthetase                                   |
| 11  | P30115   | Glutathione S-transferase A3                             |
| 74  | Q9DCM2   | Glutathione S-transferase kappa 1                        |
| 202 | P15626   | Glutathione S-transferase Mu 2                           |
| 32  | P48774   | Glutathione S-transferase Mu 5                           |
| 27  | Q80W21   | Glutathione S-transferase Mu 7                           |
| 35  | O09131   | Glutathione S-transferase omega-1                        |
| 251 | P19157   | Glutathione S-transferase P 1                            |
| 161 | Q64471   | Glutathione S-transferase theta-1                        |
| 12  | Q61133   | Glutathione S-transferase theta-2                        |
| 52  | Q9WVL0   | Maleylacetoacetate isomerase                             |
| 2   | Q9ESZ8-5 | General transcription factor II-I                        |
| 183 | Q9ERL9   | Guanylate cyclase soluble subunit alpha-3                |
| 95  | O54865   | Guanylate cyclase soluble subunit beta-1                 |
| 21  | Q8K2A1   | PTB domain-containing engulfment adapter protein 1       |
| 22  | Q9R062   | Glycogenin-1                                             |
| 1   | Q9Z1E4   | Glycogen [starch] synthase, muscle                       |
| 93  | P10922   | Histone H1.0                                             |
| 2   | P14434   | H-2 class II histocompatibility antigen, A-B alpha chain |
| 31  | P01899   | H-2 class I histocompatibility antigen, D-B alpha chain  |
| 11  | P01901   | H-2 class I histocompatibility antigen, K-B alpha chain  |
| 13  | P01898   | H-2 class I histocompatibility antigen, Q10 alpha chain  |
| 83  | Q3THW5   | Histone H2A.V                                            |
| 211 | Q9QZQ8-2 | Core histone macro-H2A.1                                 |

|      |          |                                                        |
|------|----------|--------------------------------------------------------|
| 12   | Q8CCK0   | Core histone macro-H2A.2                               |
| 35   | P84244   | Histone H3.3                                           |
| 9    | Q8CFX1   | GDH/6PGL endoplasmic bifunctional protein              |
| 225  | Q61425   | Hydroxyacyl-coenzyme A dehydrogenase, mitochondri      |
| 763  | Q8BMS1   | Trifunctional enzyme subunit alpha, mitochondrial      |
| 409  | Q99JY0   | Trifunctional enzyme subunit beta, mitochondrial       |
| 6    | Q99KB8-2 | Hydroxyacylglutathione hydrolase, mitochondrial        |
| 19   | Q9EQ21   | Hepcidin                                               |
| 33   | Q9QUP5   | Hyaluronan and proteoglycan link protein 1             |
| 16   | Q61035   | Histidine--tRNA ligase, cytoplasmic                    |
| 1    | O35387   | HCLS1-associated protein X-1                           |
| 668  | P01942   | Hemoglobin subunit alpha                               |
| 1367 | P02088   | Hemoglobin subunit beta-1                              |
| 19   | P02089   | Hemoglobin subunit beta-2                              |
| 8    | P04444   | Hemoglobin subunit beta-H1                             |
| 10   | Q61191   | Host cell factor 1                                     |
| 5    | P70288   | Histone deacetylase 2                                  |
| 17   | P51859   | Hepatoma-derived growth factor                         |
| 31   | Q9JMG7   | Hepatoma-derived growth factor-related protein 3       |
| 27   | Q3UGR5   | Haloacid dehalogenase-like hydrolase domain-contain    |
| 62   | Q8VDJ3   | Vigilin                                                |
| 19   | P29416   | Beta-hexosaminidase subunit alpha                      |
| 2    | P20060   | Beta-hexosaminidase subunit beta                       |
| 2    | Q99LI8   | Hepatocyte growth factor-regulated tyrosine kinase s   |
| 137  | Q99L13   | 3-hydroxyisobutyrate dehydrogenase, mitochondrial      |
| 88   | Q8QZS1   | 3-hydroxyisobutyryl-CoA hydrolase, mitochondrial       |
| 2    | Q9JLR9   | HIG1 domain family member 1A, mitochondrial            |
| 115  | P70349   | Histidine triad nucleotide-binding protein 1           |
| 27   | Q9D0S9   | Histidine triad nucleotide-binding protein 2, mitochoi |
| 46   | Q8VD75   | Huntingtin-interacting protein 1                       |
| 15   | P43275   | Histone H1.1                                           |
| 48   | P43276   | Histone H1.5                                           |
| 223  | P15864   | Histone H1.2                                           |
| 9    | P43277   | Histone H1.3                                           |
| 80   | P43274   | Histone H1.4                                           |
| 44   | C0HKE9   | Histone H2A type 1-H                                   |
| 567  | Q8CGP2   | Histone H2B type 1-P                                   |
| 52   | P68433   | Histone H3.1                                           |
| 204  | P84228   | Histone H3.2                                           |
| 471  | P62806   | Histone H4                                             |
| 15   | Q64522   | Histone H2A type 2-B                                   |

|     |          |                                                     |
|-----|----------|-----------------------------------------------------|
| 452 | Q64523   | Histone H2A type 2-C                                |
| 219 | P17710-3 | Hexokinase-1                                        |
| 44  | O08528   | Hexokinase-2                                        |
| 5   | P22907-2 | Porphobilinogen deaminase                           |
| 152 | P63158   | High mobility group protein B1                      |
| 4   | P30681   | High mobility group protein B2                      |
| 28  | P38060   | Hydroxymethylglutaryl-CoA lyase, mitochondrial      |
| 16  | P54869   | Hydroxymethylglutaryl-CoA synthase, mitochondrial   |
| 9   | P09602   | Non-histone chromosomal protein HMG-17              |
| 8   | Q9JL35   | High mobility group nucleosome-binding domain-con   |
| 2   | O70252   | Heme oxygenase 2                                    |
| 4   | Q9CX86   | Heterogeneous nuclear ribonucleoprotein A0          |
| 34  | P49312   | Heterogeneous nuclear ribonucleoprotein A1          |
| 162 | O88569-3 | Heterogeneous nuclear ribonucleoproteins A2/B1      |
| 152 | Q8BG05-2 | Heterogeneous nuclear ribonucleoprotein A3          |
| 82  | Q99020   | Heterogeneous nuclear ribonucleoprotein A/B         |
| 29  | Q9Z204-4 | Heterogeneous nuclear ribonucleoproteins C1/C2      |
| 108 | Q60668-4 | Heterogeneous nuclear ribonucleoprotein D0          |
| 10  | Q9Z130   | Heterogeneous nuclear ribonucleoprotein D-like      |
| 41  | Q9Z2X1   | Heterogeneous nuclear ribonucleoprotein F           |
| 83  | O35737   | Heterogeneous nuclear ribonucleoprotein H           |
| 17  | P70333   | Heterogeneous nuclear ribonucleoprotein H2          |
| 208 | P61979   | Heterogeneous nuclear ribonucleoprotein K           |
| 107 | Q8R081   | Heterogeneous nuclear ribonucleoprotein L           |
| 12  | Q921F4   | Heterogeneous nuclear ribonucleoprotein L-like      |
| 107 | Q9D0E1-2 | Heterogeneous nuclear ribonucleoprotein M           |
| 191 | Q8VEK3   | Heterogeneous nuclear ribonucleoprotein U           |
| 7   | Q8VDM6-2 | Heterogeneous nuclear ribonucleoprotein U-like prot |
| 36  | Q00PI9   | Heterogeneous nuclear ribonucleoprotein U-like prot |
| 14  | Q8BUK6   | Protein Hook homolog 3                              |
| 1   | P23463   | Homeobox protein Hox-D8                             |
| 3   | Q61646   | Haptoglobin                                         |
| 134 | Q3TEA8-2 | Heterochromatin protein 1-binding protein 3         |
| 21  | P62748   | Hippocalcin-like protein 1                          |
| 42  | P00493   | Hypoxanthine-guanine phosphoribosyltransferase      |
| 164 | Q91X72   | Hemopexin                                           |
| 5   | Q9CQZ1   | Heat shock factor-binding protein 1                 |
| 10  | P50172   | Corticosteroid 11-beta-dehydrogenase isozyme 1      |
| 133 | O08756   | 3-hydroxyacyl-CoA dehydrogenase type-2              |
| 59  | O70503   | Very-long-chain 3-oxoacyl-CoA reductase             |
| 15  | Q2TPA8   | Hydroxysteroid dehydrogenase-like protein 2         |

|      |          |                                                               |
|------|----------|---------------------------------------------------------------|
| 260  | P07901   | Heat shock protein HSP 90-alpha                               |
| 551  | P11499   | Heat shock protein HSP 90-beta                                |
| 431  | P08113   | Endoplasmin                                                   |
| 23   | Q8K0U4   | Heat shock 70 kDa protein 12A                                 |
| 83   | Q9CZJ2   | Heat shock 70 kDa protein 12B                                 |
| 354  | Q61696   | Heat shock 70 kDa protein 1A                                  |
| 15   | P17879   | Heat shock 70 kDa protein 1B                                  |
| 104  | P17156   | Heat shock-related 70 kDa protein 2                           |
| 169  | Q61316   | Heat shock 70 kDa protein 4                                   |
| 13   | P48722-2 | Heat shock 70 kDa protein 4L                                  |
| 398  | P20029   | 78 kDa glucose-regulated protein                              |
| 715  | P63017   | Heat shock cognate 71 kDa protein                             |
| 218  | P38647   | Stress-70 protein, mitochondrial                              |
| 353  | P14602   | Heat shock protein beta-1                                     |
| 50   | Q5EBG6   | Heat shock protein beta-6                                     |
| 39   | P35385   | Heat shock protein beta-7                                     |
| 29   | Q9JK92   | Heat shock protein beta-8                                     |
| 379  | P63038   | 60 kDa heat shock protein, mitochondrial                      |
| 3906 | Q05793   | Basement membrane-specific heparan sulfate proteoglycan       |
| 58   | Q61699-2 | Heat shock protein 105 kDa                                    |
| 108  | Q9R118   | Serine protease HTRA1                                         |
| 29   | Q7TMY8-3 | E3 ubiquitin-protein ligase HUWE1                             |
| 106  | Q9JKR6   | Hypoxia up-regulated protein 1                                |
| 15   | Q9DB29   | Isoamyl acetate-hydrolyzing esterase 1 homolog                |
| 17   | Q8BU30   | Isoleucine--tRNA ligase, cytoplasmic                          |
| 88   | Q8BIJ6   | Isoleucine--tRNA ligase, mitochondrial                        |
| 3    | P13597-2 | Intercellular adhesion molecule 1                             |
| 15   | P35330   | Intercellular adhesion molecule 2                             |
| 7    | Q9JHR7   | Insulin-degrading enzyme                                      |
| 133  | O88844   | Isocitrate dehydrogenase [NADP] cytoplasmic                   |
| 315  | P54071   | Isocitrate dehydrogenase [NADP], mitochondrial                |
| 224  | Q9D6R2   | Isocitrate dehydrogenase [NAD] subunit alpha, mitochondrial   |
| 100  | P70404   | Isocitrate dehydrogenase [NAD] subunit gamma 1, mitochondrial |
| 14   | Q9D8C4   | Interferon-induced 35 kDa protein homolog                     |
| 13   | Q61249   | Immunoglobulin-binding protein 1                              |
| 4    | P70389   | Insulin-like growth factor-binding protein complex acid       |
| 14   | P47880   | Insulin-like growth factor-binding protein 6                  |
| 190  | Q61581   | Insulin-like growth factor-binding protein 7                  |
| 44   | P01867-2 | Ig gamma-2B chain C region                                    |
| 8    | P01868   | Ig gamma-1 chain C region secreted form                       |
| 132  | P01837   | Ig kappa chain C region                                       |

|     |          |                                                        |
|-----|----------|--------------------------------------------------------|
| 3   | Q9DBZ1-2 | Inhibitor of nuclear factor kappa-B kinase-interacting |
| 5   | O88351   | Inhibitor of nuclear factor kappa-B kinase subunit bet |
| 19  | Q9CXY6   | Interleukin enhancer-binding factor 2                  |
| 7   | Q9Z1X4-2 | Interleukin enhancer-binding factor 3                  |
| 4   | Q8BU33-3 | Acetolactate synthase-like protein                     |
| 192 | Q8CAQ8-3 | MICOS complex subunit Mic60                            |
| 52  | O55023   | Inositol monophosphatase 1                             |
| 16  | Q0GNC1-3 | Inverted formin-2                                      |
| 37  | P40936   | Indolethylamine N-methyltransferase                    |
| 35  | P49442   | Inositol polyphosphate 1-phosphatase                   |
| 2   | Q7TPD0   | Integrator complex subunit 3                           |
| 10  | Q8VI75   | Importin-4                                             |
| 94  | Q8BKC5   | Importin-5                                             |
| 54  | Q9EPL8   | Importin-7                                             |
| 5   | Q91YE6   | Importin-9                                             |
| 428 | Q9JKF1   | Ras GTPase-activating-like protein IQGAP1              |
| 3   | Q8K3X4   | Interferon regulatory factor 2-binding protein-like    |
| 3   | Q64339   | Ubiquitin-like protein ISG15                           |
| 54  | Q6GU68   | Immunoglobulin superfamily containing leucine-rich r   |
| 4   | Q91V64   | Isochorismatase domain-containing protein 1            |
| 132 | P85094   | Isochorismatase domain-containing protein 2A, mito     |
| 19  | Q9JHU9   | Inositol-3-phosphate synthase 1                        |
| 3   | Q8C863   | E3 ubiquitin-protein ligase Itchy                      |
| 26  | Q3V3R4   | Integrin alpha-1                                       |
| 33  | Q9QUM0   | Integrin alpha-IIb                                     |
| 71  | Q62470   | Integrin alpha-3                                       |
| 81  | P11688   | Integrin alpha-5                                       |
| 6   | Q61739-2 | Integrin alpha-6                                       |
| 539 | A2ARA8   | Integrin alpha-8                                       |
| 29  | B8JK39   | Integrin alpha-9                                       |
| 126 | P43406   | Integrin alpha-V                                       |
| 565 | P09055   | Integrin beta-1                                        |
| 51  | O54890   | Integrin beta-3                                        |
| 58  | O70309   | Integrin beta-5                                        |
| 16  | Q9Z0T9   | Integrin beta-6                                        |
| 84  | Q61702   | Inter-alpha-trypsin inhibitor heavy chain H1           |
| 25  | Q61703   | Inter-alpha-trypsin inhibitor heavy chain H2           |
| 58  | A6X935   | Inter alpha-trypsin inhibitor, heavy chain 4           |
| 26  | Q9D892   | Inosine triphosphate pyrophosphatase                   |
| 137 | P11881-8 | Inositol 1,4,5-trisphosphate receptor type 1           |
| 11  | P70227   | Inositol 1,4,5-trisphosphate receptor type 3           |



|     |          |                                                     |
|-----|----------|-----------------------------------------------------|
| 66  | Q9JHI5   | Isovaleryl-CoA dehydrogenase, mitochondrial         |
| 16  | P52332   | Tyrosine-protein kinase JAK1                        |
| 20  | Q9ET78   | Junctophilin-2                                      |
| 9   | Q02257   | Junction plakoglobin                                |
| 174 | Q8BX02   | KN motif and ankyrin repeat domain-containing prote |
| 39  | Q99MN1   | Lysine--tRNA ligase                                 |
| 23  | Q9D3R6-3 | Katanin p60 ATPase-containing subunit A-like 2      |
| 14  | Q80UY2-2 | E3 ubiquitin-protein ligase KCMF1                   |
| 18  | O88454-2 | Potassium channel subfamily K member 4              |
| 50  | G5E897   | Protein O-glucosyltransferase 3                     |
| 9   | Q6GV12   | 3-ketodihydrosphingosine reductase                  |
| 19  | Q60749   | KH domain-containing, RNA-binding, signal transduct |
| 47  | Q3U0V1   | Far upstream element-binding protein 2              |
| 6   | Q8C2E7   | WASH complex subunit strumpellin                    |
| 30  | Q9EQW7   | Kinesin-like protein KIF13A                         |
| 1   | P28741   | Kinesin-like protein KIF3A                          |
| 23  | P33175   | Kinesin heavy chain isoform 5A                      |
| 87  | Q61768   | Kinesin-1 heavy chain                               |
| 30  | O88447   | Kinesin light chain 1                               |
| 8   | Q9JM71   | Kallikrein 1-related peptidase b27                  |
| 8   | P55200-2 | Histone-lysine N-methyltransferase 2A               |
| 49  | O08677-2 | Kininogen-1                                         |
| 52  | O35343   | Importin subunit alpha-3                            |
| 38  | O35345   | Importin subunit alpha-7                            |
| 30  | P32883-2 | GTPase KRas                                         |
| 129 | Q9ERE2   | Keratin, type II cuticular Hb1                      |
| 13  | Q6IMF0   | Keratin, type II cuticular Hb3                      |
| 9   | O08640   | Keratin-associated protein 14                       |
| 10  | Q9QZU5   | Keratin-associated protein 15-1                     |
| 7   | O08632   | Keratin-associated protein 19-5                     |
| 6   | A2A591   | Keratin-associated protein 3-1                      |
| 37  | Q9D3I6   | Keratin-associated protein 7-1                      |
| 1   | Q61595-6 | Kinectin                                            |
| 2   | Q9CXA2   | Trans-L-3-hydroxyproline dehydratase                |
| 9   | Q99KR3   | Beta-lactamase-like protein 2                       |
| 93  | Q60675   | Laminin subunit alpha-2                             |
| 232 | P97927   | Laminin subunit alpha-4                             |
| 584 | Q61001   | Laminin subunit alpha-5                             |
| 21  | P02469   | Laminin subunit beta-1                              |
| 996 | Q61292   | Laminin subunit beta-2                              |
| 597 | P02468   | Laminin subunit gamma-1                             |

|     |          |                                                       |
|-----|----------|-------------------------------------------------------|
| 5   | P11438   | Lysosome-associated membrane glycoprotein 1           |
| 37  | P17047-3 | Lysosome-associated membrane glycoprotein 2           |
| 11  | Q9CQ22   | Ragulator complex protein LAMTOR1                     |
| 4   | Q9D1L9   | Ragulator complex protein LAMTOR5                     |
| 4   | Q9JJK2   | LanC-like protein 2                                   |
| 53  | Q9CPY7-2 | Cytosol aminopeptidase                                |
| 9   | Q8BMJ2   | Leucine--tRNA ligase, cytoplasmic                     |
| 40  | Q61792   | LIM and SH3 domain protein 1                          |
| 27  | Q61233   | Plastin-2                                             |
| 202 | Q9JKS4-3 | LIM domain-binding protein 3                          |
| 342 | P06151   | L-lactate dehydrogenase A chain                       |
| 192 | P16125   | L-lactate dehydrogenase B chain                       |
| 12  | Q9Z1F6   | Leukocyte cell-derived chemotaxin 1                   |
| 34  | Q6DVA0   | LEM domain-containing protein 2                       |
| 17  | Q8CG70   | Prolyl 3-hydroxylase 3                                |
| 58  | Q9Z210   | LETM1 and EF-hand domain-containing protein 1, mit    |
| 25  | Q924L1-2 | LETM1 domain-containing protein 1                     |
| 343 | P16045   | Galectin-1                                            |
| 22  | P16110   | Galectin-3                                            |
| 16  | O89017   | Legumain                                              |
| 2   | P42703-2 | Leukemia inhibitory factor receptor                   |
| 25  | Q3UH68-3 | LIM and calponin homology domains-containing prot     |
| 152 | Q99JW4   | LIM and senescent cell antigen-like-containing domai  |
| 72  | Q91XD2   | LIM and senescent cell antigen-like-containing domai  |
| 6   | Q9Z0M5   | Lysosomal acid lipase/cholesteryl ester hydrolase     |
| 62  | P54310   | Hormone-sensitive lipase                              |
| 30  | Q9D0F3   | Protein ERGIC-53                                      |
| 25  | Q9DBH5   | Vesicular integral-membrane protein VIP36             |
| 279 | Q8VEE1   | LIM and cysteine-rich domains protein 1               |
| 3   | Q8C3X8   | Lipase maturation factor 2                            |
| 752 | P48678   | Prelamin-A/C                                          |
| 192 | P14733   | Lamin-B1                                              |
| 68  | P21619   | Lamin-B2                                              |
| 249 | Q8BVA4   | Leiomodin-1                                           |
| 49  | Q8C129   | Leucyl-cystinyl aminopeptidase                        |
| 77  | Q8CGK3   | Lon protease homolog, mitochondrial                   |
| 469 | P97873   | Lysyl oxidase homolog 1                               |
| 8   | Q9Z175   | Lysyl oxidase homolog 3                               |
| 6   | P11152   | Lipoprotein lipase                                    |
| 813 | Q8BFW7   | Lipoma-preferred partner homolog                      |
| 277 | Q91ZX7   | Prolow-density lipoprotein receptor-related protein 1 |

|     |          |                                                       |
|-----|----------|-------------------------------------------------------|
| 24  | P55302   | Alpha-2-macroglobulin receptor-associated protein     |
| 82  | Q6PB66   | Leucine-rich PPR motif-containing protein, mitochondr |
| 137 | Q9CXD9   | Leucine-rich repeat-containing protein 17             |
| 16  | Q8BGI7   | Leucine-rich repeat-containing protein 39             |
| 9   | Q9CRC8   | Leucine-rich repeat-containing protein 40             |
| 7   | Q8C031   | Leucine-rich repeat-containing protein 4C             |
| 88  | Q922Q8   | Leucine-rich repeat-containing protein 59             |
| 17  | Q3UZ39-2 | Leucine-rich repeat flightless-interacting protein 1  |
| 10  | P62311   | U6 snRNA-associated Sm-like protein LSm3              |
| 7   | P62322   | U6 snRNA-associated Sm-like protein LSm5              |
| 10  | Q9CQQ8   | U6 snRNA-associated Sm-like protein LSm7              |
| 158 | P24527   | Leukotriene A-4 hydrolase                             |
| 228 | Q8CG19-2 | Latent-transforming growth factor beta-binding prote  |
| 4   | O08999   | Latent-transforming growth factor beta-binding prote  |
| 27  | Q61810   | Latent-transforming growth factor beta-binding prote  |
| 862 | Q8K4G1-2 | Latent-transforming growth factor beta-binding prote  |
| 4   | Q7TNC4-2 | Putative RNA-binding protein Luc7-like 2              |
| 16  | Q5SUF2   | Luc7-like protein 3                                   |
| 713 | P51885   | Lumican                                               |
| 18  | P70202   | Latexin                                               |
| 18  | P05533   | Lymphocyte antigen 6A-2/6E-1                          |
| 9   | P0CW02   | Lymphocyte antigen 6C1                                |
| 92  | P97823-2 | Acyl-protein thioesterase 1                           |
| 38  | Q9WTL7   | Acyl-protein thioesterase 2                           |
| 5   | Q91V16   | LYR motif-containing protein 5                        |
| 20  | P24668   | Cation-dependent mannose-6-phosphate receptor         |
| 17  | Q9QXZ0   | Microtubule-actin cross-linking factor 1              |
| 32  | Q922B1   | O-acetyl-ADP-ribose deacetylase MACROD1               |
| 39  | Q91W89   | Alpha-mannosidase 2C1                                 |
| 28  | Q9CXI5   | Mesencephalic astrocyte-derived neurotrophic factor   |
| 19  | Q64133   | Amine oxidase [flavin-containing] A                   |
| 75  | Q8BW75   | Amine oxidase [flavin-containing] B                   |
| 58  | Q9QYR6   | Microtubule-associated protein 1A                     |
| 208 | P14873   | Microtubule-associated protein 1B                     |
| 16  | Q91VR7   | Microtubule-associated proteins 1A/1B light chain 3A  |
| 25  | Q9CQV6   | Microtubule-associated proteins 1A/1B light chain 3B  |
| 22  | Q8C052   | Microtubule-associated protein 1S                     |
| 38  | P31938   | Dual specificity mitogen-activated protein kinase kin |
| 7   | O09110-2 | Dual specificity mitogen-activated protein kinase kin |
| 2   | P47809   | Dual specificity mitogen-activated protein kinase kin |
| 10  | E9Q3S4   | Mitogen-activated protein kinase kinase kinase 19     |

|     |          |                                                       |
|-----|----------|-------------------------------------------------------|
| 108 | P27546-3 | Microtubule-associated protein 4                      |
| 12  | Q7TSJ2-3 | Microtubule-associated protein 6                      |
| 42  | P63085   | Mitogen-activated protein kinase 1                    |
| 2   | P47811-4 | Mitogen-activated protein kinase 14                   |
| 14  | Q63844   | Mitogen-activated protein kinase 3                    |
| 14  | Q8R001-2 | Microtubule-associated protein RP/EB family membe     |
| 4   | Q68FL6   | Methionine--tRNA ligase, cytoplasmic                  |
| 9   | Q7TQJ1   | MARVEL domain-containing protein 1                    |
| 2   | Q3THS6   | S-adenosylmethionine synthase isoform type-2          |
| 106 | Q8K310   | Matrin-3                                              |
| 44  | P04247   | Myoglobin                                             |
| 2   | Q9Z2E1-2 | Methyl-CpG-binding domain protein 2                   |
| 13  | P39039   | Mannose-binding protein A                             |
| 10  | P41317   | Mannose-binding protein C                             |
| 38  | Q9JKP5   | Muscleblind-like protein 1                            |
| 4   | Q8CHK3   | Lysophospholipid acyltransferase 7                    |
| 16  | P04370-4 | Myelin basic protein                                  |
| 33  | Q99MR8   | Methylcrotonoyl-CoA carboxylase subunit alpha, mitc   |
| 37  | Q3ULD5   | Methylcrotonoyl-CoA carboxylase beta chain, mitoch    |
| 6   | Q9D1I5   | Methylmalonyl-CoA epimerase, mitochondrial            |
| 15  | Q8K5B2   | Multiple coagulation factor deficiency protein 2 homi |
| 11  | P21843   | Mast cell protease 3                                  |
| 85  | P21812   | Mast cell protease 4                                  |
| 16  | Q3UMR5-2 | Calcium uniporter protein, mitochondrial              |
| 187 | P14152   | Malate dehydrogenase, cytoplasmic                     |
| 356 | P08249   | Malate dehydrogenase, mitochondrial                   |
| 21  | Q9D967   | Magnesium-dependent phosphatase 1                     |
| 167 | P06801   | NADP-dependent malic enzyme                           |
| 43  | Q9Z2D6   | Methyl-CpG-binding protein 2                          |
| 44  | Q9DCS3   | Trans-2-enoyl-CoA reductase, mitochondrial            |
| 8   | Q80V70   | Multiple epidermal growth factor-like domains prote   |
| 8   | Q91VH6   | Protein MEMO1                                         |
| 6   | O08663   | Methionine aminopeptidase 2                           |
| 20  | P55002   | Microfibrillar-associated protein 2                   |
| 210 | Q9D1H9   | Microfibril-associated glycoprotein 4                 |
| 70  | Q9QZJ6   | Microfibrillar-associated protein 5                   |
| 341 | P21956-2 | Lactadherin                                           |
| 1   | Q80U63-2 | Mitofusin-2                                           |
| 20  | P19788   | Matrix Gla protein                                    |
| 25  | Q91VS7   | Microsomal glutathione S-transferase 1                |
| 9   | Q9CPU4   | Microsomal glutathione S-transferase 3                |

|     |          |                                                     |
|-----|----------|-----------------------------------------------------|
| 32  | Q8VDP3-2 | Protein-methionine sulfoxide oxidase MICAL1         |
| 14  | Q8BML1   | Protein-methionine sulfoxide oxidase MICAL2         |
| 9   | Q8BGT6-2 | MICAL-like protein 1                                |
| 117 | P34884   | Macrophage migration inhibitory factor              |
| 16  | Q7TNS2   | MICOS complex subunit Mic10                         |
| 12  | Q6ZQI3   | Malectin                                            |
| 7   | Q8C7H1   | Methylmalonic aciduria type A homolog, mitochondr   |
| 1   | Q8K273   | Membrane magnesium transporter 1                    |
| 4   | Q9D071-2 | MMS19 nucleotide excision repair protein homolog    |
| 1   | Q61884   | Meiosis-specific nuclear structural protein 1       |
| 7   | Q80UM7   | Mannosyl-oligosaccharide glucosidase                |
| 21  | P56379   | 6.8 kDa mitochondrial proteolipid                   |
| 33  | P63030   | Mitochondrial pyruvate carrier 1                    |
| 86  | Q9D023   | Mitochondrial pyruvate carrier 2                    |
| 13  | P70290   | 55 kDa erythrocyte membrane protein                 |
| 7   | Q99J99   | 3-mercaptopyruvate sulfurtransferase                |
| 32  | P27573   | Myelin protein P0                                   |
| 42  | Q61830   | Macrophage mannose receptor 1                       |
| 31  | Q64449   | C-type mannose receptor 2                           |
| 4   | Q8VCJ6   | Mas-related G-protein coupled receptor member F     |
| 3   | Q9CQT1   | Methylthioribose-1-phosphate isomerase              |
| 1   | Q9DB15   | 39S ribosomal protein L12, mitochondrial            |
| 20  | Q9CQX8   | 28S ribosomal protein S36, mitochondrial            |
| 33  | Q9WUX5-2 | Protein MRVI1                                       |
| 620 | P26041   | Moesin                                              |
| 13  | Q9D6Y7-3 | Mitochondrial peptide methionine sulfoxide reductas |
| 31  | Q8BU85   | Methionine-R-sulfoxide reductase B3, mitochondrial  |
| 78  | Q9CQ65   | S-methyl-5-thioadenosine phosphorylase              |
| 39  | Q922Q1   | Mitochondrial amidoxime reducing component 2        |
| 16  | P03930   | ATP synthase protein 8                              |
| 115 | Q791V5   | Mitochondrial carrier homolog 2                     |
| 115 | P00405   | Cytochrome c oxidase subunit 2                      |
| 3   | Q9CWE0   | Mitochondrial fission regulator 1-like              |
| 51  | Q922D8   | C-1-tetrahydrofolate synthase, cytoplasmic          |
| 14  | Q3V3R1   | Monofunctional C1-tetrahydrofolate synthase, mitoc  |
| 1   | P03911   | NADH-ubiquinone oxidoreductase chain 4              |
| 26  | P03921   | NADH-ubiquinone oxidoreductase chain 5              |
| 2   | Q9JLN9   | Serine/threonine-protein kinase mTOR                |
| 99  | P62774   | Myotrophin                                          |
| 7   | P47802   | Metaxin-1                                           |
| 39  | O88441   | Metaxin-2                                           |

|      |          |                                                      |
|------|----------|------------------------------------------------------|
| 234  | P28665   | Murinoglobulin-1                                     |
| 16   | P16332   | Methylmalonyl-CoA mutase, mitochondrial              |
| 107  | Q9EQK5   | Major vault protein                                  |
| 24   | O35682   | Myeloid-associated differentiation marker            |
| 50   | Q7TPV4   | Myb-binding protein 1A                               |
| 13   | Q9EQS3   | C-Myc-binding protein                                |
| 11   | P22366-2 | Myeloid differentiation primary response protein My  |
| 3    | Q9JK81   | UPF0160 protein MYG1, mitochondrial                  |
| 681  | Q61879   | Myosin-10                                            |
| 4868 | O08638   | Myosin-11                                            |
| 73   | O08638-2 | Myosin-11                                            |
| 30   | Q6URW6-2 | Myosin-14                                            |
| 140  | Q5SX39   | Myosin-4                                             |
| 369  | Q8VDD5   | Myosin-9                                             |
| 59   | P05977   | Myosin light chain 1/3, skeletal muscle isoform      |
| 60   | Q3THE2   | Myosin regulatory light chain 12B                    |
| 437  | Q60605   | Myosin light polypeptide 6                           |
| 471  | Q9CQ19   | Myosin regulatory light polypeptide 9                |
| 659  | Q6PDN3-3 | Myosin light chain kinase, smooth muscle             |
| 2    | Q9JMH9-5 | Unconventional myosin-XVIIIa                         |
| 1    | O88329   | Unconventional myosin-Ia                             |
| 534  | Q9WTI7   | Unconventional myosin-Ic                             |
| 64   | Q5SYD0   | Unconventional myosin-I d                            |
| 8    | Q9QY06-3 | Unconventional myosin-IXb                            |
| 200  | Q69ZN7   | Myoferlin                                            |
| 21   | Q8BR90   | UPF0600 protein C5orf51 homolog                      |
| 3    | P01786   | Ig heavy chain V region MOPC 47A                     |
| 32   | Q91V76   | Ester hydrolase C11orf54 homolog                     |
| 66   | P01864   | Ig gamma-2A chain C region secreted form             |
| 14   | P01878   | Ig alpha chain C region                              |
| 27   | P03987-2 | Ig gamma-3 chain C region                            |
| 13   | P01668   | Ig kappa chain V-III region PC 7210                  |
| 7    | Q6SKR2   |                                                      |
| 5    | Q80UM3   | N-alpha-acetyltransferase 15, NatA auxiliary subunit |
| 31   | Q9CZR2   | N-acetylated-alpha-linked acidic dipeptidase 2       |
| 31   | Q60817   | Nascent polypeptide-associated complex subunit alpl  |
| 17   | Q8VBW6   | NEDD8-activating enzyme E1 regulatory subunit        |
| 27   | Q9QWR8   | Alpha-N-acetylgalactosaminidase                      |
| 32   | Q99KQ4   | Nicotinamide phosphoribosyltransferase               |
| 64   | P28656   | Nucleosome assembly protein 1-like 1                 |
| 47   | Q78ZA7   | Nucleosome assembly protein 1-like 4                 |

|     |          |                                                    |
|-----|----------|----------------------------------------------------|
| 29  | Q9DB05   | Alpha-soluble NSF attachment protein               |
| 13  | Q8CC86   | Nicotinate phosphoribosyltransferase               |
| 26  | Q8BP47   | Asparagine--tRNA ligase, cytoplasmic               |
| 25  | Q91X97   | Neurocalcin-delta                                  |
| 56  | P13595-3 | Neural cell adhesion molecule 1                    |
| 2   | Q8BLF1   | Neutral cholesterol ester hydrolase 1              |
| 36  | P28660-2 | Nck-associated protein 1                           |
| 76  | P09405   | Nucleolin                                          |
| 21  | Q8VCM8   | Nicalin                                            |
| 46  | Q62433   | Protein NDRG1                                      |
| 112 | Q9QYG0-2 | Protein NDRG2                                      |
| 3   | O35683   | NADH dehydrogenase [ubiquinone] 1 alpha subcomp    |
| 111 | Q99LC3   | NADH dehydrogenase [ubiquinone] 1 alpha subcomp    |
| 10  | Q9D8B4   | NADH dehydrogenase [ubiquinone] 1 alpha subcomp    |
| 50  | Q7TMF3   | NADH dehydrogenase [ubiquinone] 1 alpha subcomp    |
| 34  | Q9ERS2   | NADH dehydrogenase [ubiquinone] 1 alpha subcomp    |
| 13  | Q9CQ75   | NADH dehydrogenase [ubiquinone] 1 alpha subcomp    |
| 20  | Q9CQ91   | NADH dehydrogenase [ubiquinone] 1 alpha subcomp    |
| 40  | Q62425   | Cytochrome c oxidase subunit NDUF4A                |
| 15  | Q9CPP6   | NADH dehydrogenase [ubiquinone] 1 alpha subcomp    |
| 38  | Q9CQZ5   | NADH dehydrogenase [ubiquinone] 1 alpha subcomp    |
| 85  | Q9DCJ5   | NADH dehydrogenase [ubiquinone] 1 alpha subcomp    |
| 86  | Q9DC69   | NADH dehydrogenase [ubiquinone] 1 alpha subcomp    |
| 8   | Q9D1H6   | NADH dehydrogenase [ubiquinone] 1 alpha subcomp    |
| 1   | Q9CWG8-2 | NADH dehydrogenase [ubiquinone] complex I, assem   |
| 49  | P0DN34   | NADH dehydrogenase [ubiquinone] 1 beta subcompli   |
| 32  | Q9DCS9   | NADH dehydrogenase [ubiquinone] 1 beta subcompli   |
| 16  | Q9CQZ6   | NADH dehydrogenase [ubiquinone] 1 beta subcompli   |
| 18  | Q9CQC7   | NADH dehydrogenase [ubiquinone] 1 beta subcompli   |
| 15  | Q9CQH3   | NADH dehydrogenase [ubiquinone] 1 beta subcompli   |
| 5   | Q3UIU2   | NADH dehydrogenase [ubiquinone] 1 beta subcompli   |
| 19  | Q9CR61   | NADH dehydrogenase [ubiquinone] 1 beta subcompli   |
| 38  | Q9CQJ8   | NADH dehydrogenase [ubiquinone] 1 beta subcompli   |
| 34  | Q9CQ54   | NADH dehydrogenase [ubiquinone] 1 subunit C2       |
| 130 | Q91VD9   | NADH-ubiquinone oxidoreductase 75 kDa subunit, m   |
| 96  | Q91WD5   | NADH dehydrogenase [ubiquinone] iron-sulfur protei |
| 83  | Q9DCT2   | NADH dehydrogenase [ubiquinone] iron-sulfur protei |
| 29  | Q9CXZ1   | NADH dehydrogenase [ubiquinone] iron-sulfur protei |
| 40  | Q99LY9   | NADH dehydrogenase [ubiquinone] iron-sulfur protei |
| 27  | P52503   | NADH dehydrogenase [ubiquinone] iron-sulfur protei |
| 10  | Q9DC70   | NADH dehydrogenase [ubiquinone] iron-sulfur protei |

|     |          |                                                      |
|-----|----------|------------------------------------------------------|
| 51  | Q8K3J1   | NADH dehydrogenase [ubiquinone] iron-sulfur protei   |
| 88  | Q91YT0   | NADH dehydrogenase [ubiquinone] flavoprotein 1, m    |
| 23  | Q9D6J6   | NADH dehydrogenase [ubiquinone] flavoprotein 2, m    |
| 1   | Q8BK30   | NADH dehydrogenase [ubiquinone] flavoprotein 3, m    |
| 11  | Q9DC07   | LIM zinc-binding domain-containing Nebulette         |
| 114 | P46935   | E3 ubiquitin-protein ligase NEDD4                    |
| 40  | P29595   | NEDD8                                                |
| 11  | P08553   | Neurofilament medium polypeptide                     |
| 27  | Q922L6   | Negative elongation factor D                         |
| 23  | Q6P5H2-2 | Nestin                                               |
| 17  | Q7TPW1   | Nexilin                                              |
| 5   | P97863-3 | Nuclear factor 1 B-type                              |
| 7   | P70255-2 | Nuclear factor 1 C-type                              |
| 11  | P70257-2 | Nuclear factor 1 X-type                              |
| 7   | Q9QZ23   | NFU1 iron-sulfur cluster scaffold homolog, mitochonr |
| 10  | Q8CHT1-2 | Ephexin-1                                            |
| 13  | Q9D0T1   | NHP2-like protein 1                                  |
| 251 | P10493   | Nidogen-1                                            |
| 110 | O88322   | Nidogen-2                                            |
| 30  | Q9EQ80   | NIF3-like protein 1                                  |
| 7   | O70131   | Ninjurin-1                                           |
| 46  | Q8VDK1-2 | Nitrilase homolog 1                                  |
| 84  | Q9JHW2   | Omega-amidase NIT2                                   |
| 8   | Q3TL44   | NLR family member X1                                 |
| 28  | P15532   | Nucleoside diphosphate kinase A                      |
| 280 | Q01768   | Nucleoside diphosphate kinase B                      |
| 2   | Q9WV85   | Nucleoside diphosphate kinase 3                      |
| 3   | Q8K2T1   | NmrA-like family domain-containing protein 1         |
| 18  | O70310   | Glycylpeptide N-tetradecanoyltransferase 1           |
| 177 | Q61941   | NAD(P) transhydrogenase, mitochondrial               |
| 56  | Q99K48   | Non-POU domain-containing octamer-binding protei     |
| 21  | Q6DFW4   | Nucleolar protein 58                                 |
| 27  | Q64299   | Protein NOV homolog                                  |
| 9   | Q6NSR8   | Probable aminopeptidase NPEPL1                       |
| 71  | Q11011   | Puromycin-sensitive aminopeptidase                   |
| 73  | Q61937   | Nucleophosmin                                        |
| 341 | Q91V88-4 | Nephronectin                                         |
| 15  | Q91V88-3 | Nephronectin                                         |
| 53  | P97300-3 | Neuroplastin                                         |
| 49  | Q64669   | NAD(P)H dehydrogenase [quinone] 1                    |
| 21  | Q9JI75   | Ribosyldihyronicotinamide dehydrogenase [quinone     |



|     |          |                                                       |
|-----|----------|-------------------------------------------------------|
| 48  | P46460   | Vesicle-fusing ATPase                                 |
| 20  | Q9CZ44   | NSFL1 cofactor p47                                    |
| 41  | Q9JM14   | 5(3)-deoxyribonucleotidase, cytosolic type            |
| 8   | Q61503   | 5-nucleotidase                                        |
| 67  | O09118   | Netrin-1                                              |
| 40  | Q02819   | Nucleobindin-1                                        |
| 17  | P81117   | Nucleobindin-2                                        |
| 24  | O35685   | Nuclear migration protein nudC                        |
| 15  | P0C028   | Diphosphoinositol polyphosphate phosphohydrolase      |
| 9   | Q6P3D0   | U8 snoRNA-decapping enzyme                            |
| 12  | Q3U2V3   | 8-oxo-dGDP phosphatase NUDT18                         |
| 52  | Q9CQF3   | Cleavage and polyadenylation specificity factor subur |
| 16  | Q8CH40   | Nucleoside diphosphate-linked moiety X motif 6        |
| 2   | Q99P30-5 | Peroxisomal coenzyme A diphosphatase NUDT7            |
| 18  | E9Q7G0   | Nuclear mitotic apparatus protein 1                   |
| 3   | Q8R0G9   | Nuclear pore complex protein Nup133                   |
| 9   | Q99P88   | Nuclear pore complex protein Nup155                   |
| 1   | Q9Z0W3-2 | Nuclear pore complex protein Nup160                   |
| 10  | Q8BJ71   | Nuclear pore complex protein Nup93                    |
| 75  | P61971   | Nuclear transport factor 2                            |
| 10  | Q5DTZ0   | Protein NYNRIN                                        |
| 200 | P29758   | Ornithine aminotransferase, mitochondrial             |
| 17  | Q9CRD0-3 | OCIA domain-containing protein 1                      |
| 613 | Q60597   | 2-oxoglutarate dehydrogenase, mitochondrial           |
| 461 | Q62000   | Mimecan                                               |
| 76  | Q9CZ30   | Obg-like ATPase 1                                     |
| 5   | O35103   | Osteomodulin                                          |
| 48  | P58281   | Dynamin-like 120 kDa protein, mitochondrial           |
| 19  | Q60590   | Alpha-1-acid glycoprotein 1                           |
| 28  | Q3B7Z2-2 | Oxysterol-binding protein 1                           |
| 6   | Q8CI95   | Oxysterol-binding protein-related protein 11          |
| 15  | Q9DBS9   | Oxysterol-binding protein-related protein 3           |
| 11  | A2A8Z1-2 | Oxysterol-binding protein-related protein 9           |
| 1   | Q78XF5   | Oligosaccharyltransferase complex subunit OSTC        |
| 36  | Q62422   | Osteoclast-stimulating factor 1                       |
| 85  | Q7TQI3   | Ubiquitin thioesterase OTUB1                          |
| 285 | Q9D0K2   | Succinyl-CoA:3-ketoacid coenzyme A transferase 1, m   |
| 22  | Q6P9R2   | Serine/threonine-protein kinase OSR1                  |
| 285 | P09103   | Protein disulfide-isomerase                           |
| 34  | P50580-2 | Proliferation-associated protein 2G4                  |
| 87  | P29341   | Polyadenylate-binding protein 1                       |

|     |          |                                                         |
|-----|----------|---------------------------------------------------------|
| 5   | Q8CCS6-2 | Polyadenylate-binding protein 2                         |
| 36  | Q9WVE8   | Protein kinase C and casein kinase substrate in neuro   |
| 23  | P63005   | Platelet-activating factor acetylhydrolase IB subunit a |
| 61  | Q61206   | Platelet-activating factor acetylhydrolase IB subunit b |
| 41  | Q9DCL9   | Multifunctional protein ADE2                            |
| 38  | Q8CIN4   | Serine/threonine-protein kinase PAK 2                   |
| 2   | Q9Z0P4   | Paralemmin-1                                            |
| 3   | Q8COL6   | Peroxisomal N(1)-acetyl-spermine/spermidine oxidas      |
| 4   | Q9EPX2   | Papilin                                                 |
| 16  | O88428   | Bifunctional 3-phosphoadenosine 5-phosphosulfate s      |
| 231 | Q99LX0   | Protein deglycase DJ-1                                  |
| 6   | Q8BZ20   | Poly [ADP-ribose] polymerase 12                         |
| 18  | Q3ULW8-2 |                                                         |
| 165 | Q9EPC1   | Alpha-parvin                                            |
| 9   | Q9ES46   | Beta-parvin                                             |
| 35  | Q925B0-2 | PRKC apoptosis WT1 regulator protein                    |
| 1   | Q8BSQ9-2 | Protein polybromo-1                                     |
| 87  | Q3TVI8   | Pre-B-cell leukemia transcription factor-interacting pi |
| 207 | Q05920   | Pyruvate carboxylase, mitochondrial                     |
| 95  | P60335   | Poly(rC)-binding protein 1                              |
| 47  | Q61990-2 | Poly(rC)-binding protein 2                              |
| 59  | Q91ZA3   | Propionyl-CoA carboxylase alpha chain, mitochondria     |
| 69  | Q99MN9   | Propionyl-CoA carboxylase beta chain, mitochondrial     |
| 57  | Q8BH04   | Phosphoenolpyruvate carboxykinase [GTP], mitochor       |
| 65  | P23506   | Protein-L-isoaspartate(D-aspartate) O-methyltransfer    |
| 26  | Q9CQF9   | Prenylcysteine oxidase                                  |
| 3   | Q8C7K6   | Prenylcysteine oxidase-like                             |
| 2   | P49586   | Choline-phosphate cytidyltransferase A                  |
| 17  | Q8VE70   | Programmed cell death protein 10                        |
| 31  | P56812   | Programmed cell death protein 5                         |
| 91  | P12815-2 | Programmed cell death protein 6                         |
| 202 | Q9WU78   | Programmed cell death 6-interacting protein             |
| 5   | Q8BFQ8   | Parkinson disease 7 domain-containing protein 1         |
| 52  | Q9Z0X4   | cGMP-inhibited 3,5-cyclic phosphodiesterase A           |
| 8   | Q8CG03   | cGMP-specific 3,5-cyclic phosphodiesterase              |
| 17  | P05622   | Platelet-derived growth factor receptor beta            |
| 140 | P35486   | Pyruvate dehydrogenase E1 component subunit alph        |
| 157 | Q9D051   | Pyruvate dehydrogenase E1 component subunit beta        |
| 4   | Q8BKZ9   | Pyruvate dehydrogenase protein X component, mitoc       |
| 452 | P27773   | Protein disulfide-isomerase A3                          |
| 103 | P08003   | Protein disulfide-isomerase A4                          |

|     |          |                                                             |
|-----|----------|-------------------------------------------------------------|
| 4   | Q921X9   | Protein disulfide-isomerase A5                              |
| 150 | Q922R8   | Protein disulfide-isomerase A6                              |
| 5   | Q9JK42   | [Pyruvate dehydrogenase (acetyl-transferring)] kinase       |
| 12  | Q922H2   | [Pyruvate dehydrogenase (acetyl-transferring)] kinase       |
| 319 | O70400   | PDZ and LIM domain protein 1                                |
| 218 | O70209   | PDZ and LIM domain protein 3                                |
| 79  | P70271   | PDZ and LIM domain protein 4                                |
| 16  | Q3UV70   | [Pyruvate dehydrogenase [acetyl-transferring]]-phosphatase  |
| 7   | Q6A026   | Sister chromatid cohesion protein PDS5 homolog A            |
| 16  | Q4VA53   | Sister chromatid cohesion protein PDS5 homolog B            |
| 3   | Q99K01-3 | Pyridoxal-dependent decarboxylase domain-containing protein |
| 56  | Q8K183   | Pyridoxal kinase                                            |
| 41  | Q62048   | Astrocytic phosphoprotein PEA-15                            |
| 201 | P70296   | Phosphatidylethanolamine-binding protein 1                  |
| 2   | Q08481-4 | Platelet endothelial cell adhesion molecule                 |
| 15  | Q11136   | Xaa-Pro dipeptidase                                         |
| 5   | Q8VCI5-2 | Peroxisomal biogenesis factor 19                            |
| 7   | O09012-2 | Peroxisomal targeting signal 1 receptor                     |
| 81  | Q9Z126   | Platelet factor 4                                           |
| 8   | O70591   | Prefoldin subunit 2                                         |
| 31  | Q9WU28   | Prefoldin subunit 5                                         |
| 16  | Q03958   | Prefoldin subunit 6                                         |
| 57  | P12382   | ATP-dependent 6-phosphofructokinase, liver type             |
| 63  | P47857   | ATP-dependent 6-phosphofructokinase, muscle type            |
| 175 | Q9WUA3   | ATP-dependent 6-phosphofructokinase, platelet type          |
| 229 | Q9DBJ1   | Phosphoglycerate mutase 1                                   |
| 83  | Q9DCD0   | 6-phosphogluconate dehydrogenase, decarboxylating           |
| 345 | P09411   | Phosphoglycerate kinase 1                                   |
| 178 | Q9CQ60   | 6-phosphogluconolactonase                                   |
| 144 | Q9D0F9   | Phosphoglucomutase-1                                        |
| 11  | Q7TSV4   | Phosphoglucomutase-2                                        |
| 5   | Q9CYR6   | Phosphoacetylglucosamine mutase                             |
| 598 | Q8BZF8   | Phosphoglucomutase-like protein 5                           |
| 22  | Q8CHP8   | Phosphoglycolate phosphatase                                |
| 68  | O55022   | Membrane-associated progesterone receptor component 1       |
| 8   | Q80UU9   | Membrane-associated progesterone receptor component 2       |
| 124 | P67778   | Prohibitin                                                  |
| 103 | O35129   | Prohibitin-2                                                |
| 9   | Q61753   | D-3-phosphoglycerate dehydrogenase                          |
| 2   | Q9DB26   | Phytanoyl-CoA dioxygenase domain-containing protein         |
| 66  | Q8BS03   | Peptidase inhibitor 15                                      |

|     |          |                                                        |
|-----|----------|--------------------------------------------------------|
| 9   | E9Q3L2   | Phosphatidylinositol 4-kinase alpha                    |
| 98  | Q7M6Y3-2 | Phosphatidylinositol-binding clathrin assembly protei  |
| 3   | Q6PD26   | GPI transamidase component PIG-S                       |
| 11  | Q9QUR7   | Peptidyl-prolyl cis-trans isomerase NIMA-interacting   |
| 9   | O70172   | Phosphatidylinositol 5-phosphate 4-kinase type-2 alp   |
| 10  | Q9D711   | Pirin                                                  |
| 48  | P53810   | Phosphatidylinositol transfer protein alpha isoform    |
| 2   | P53811   | Phosphatidylinositol transfer protein beta isoform     |
| 31  | Q8K411-3 | Presequence protease, mitochondrial                    |
| 786 | P52480   | Pyruvate kinase PKM                                    |
| 67  | P52480-2 | Pyruvate kinase PKM                                    |
| 16  | P70268   | Serine/threonine-protein kinase N1                     |
| 25  | P47713   | Cytosolic phospholipase A2                             |
| 1   | Q9Z1B3-2 | 1-phosphatidylinositol 4,5-bisphosphate phosphodie:    |
| 19  | P51432   | 1-phosphatidylinositol 4,5-bisphosphate phosphodie:    |
| 156 | Q8R3B1   | 1-phosphatidylinositol 4,5-bisphosphate phosphodie:    |
| 496 | Q9QXS1-2 | Plectin                                                |
| 100 | P20918   | Plasminogen                                            |
| 185 | Q8CGN5   | Perilipin-1                                            |
| 83  | Q9DBG5   | Perilipin-3                                            |
| 235 | O88492   | Perilipin-4                                            |
| 8   | Q9R1Q7   | Proteolipid protein 2                                  |
| 464 | Q99K51   | Plastin-3                                              |
| 4   | Q9JIZ9   | Phospholipid scramblase 3                              |
| 11  | Q9DC11   | Plexin domain-containing protein 2                     |
| 11  | B2RXS4   | Plexin-B2                                              |
| 8   | Q60953-2 | Protein PML                                            |
| 19  | Q9DC61   | Mitochondrial-processing peptidase subunit alpha       |
| 5   | O35691   | Pinin                                                  |
| 62  | P23492   | Purine nucleoside phosphorylase                        |
| 30  | Q7TQ62   | Podocan                                                |
| 9   | Q8VHI3   | GDP-fucose protein O-fucosyltransferase 2              |
| 16  | Q8BYB9   | Protein O-glycosyltransferase 1                        |
| 16  | Q923G2   | DNA-directed RNA polymerases I, II, and III subunit RI |
| 11  | P52430   | Serum paraoxonase/arylesterase 1                       |
| 85  | Q62087   | Serum paraoxonase/lactonase 3                          |
| 93  | P37040   | NADPH--cytochrome P450 reductase                       |
| 18  | Q62009-5 | Periostin                                              |
| 48  | Q9D819   | Inorganic pyrophosphatase                              |
| 12  | Q91VM9   | Inorganic pyrophosphatase 2, mitochondrial             |
| 440 | P17742   | Peptidyl-prolyl cis-trans isomerase A                  |

|      |          |                                                       |
|------|----------|-------------------------------------------------------|
| 147  | P24369   | Peptidyl-prolyl cis-trans isomerase B                 |
| 39   | Q9CR16   | Peptidyl-prolyl cis-trans isomerase D                 |
| 14   | Q9R269   | Periplakin                                            |
| 16   | P36993-4 | Protein phosphatase 1B                                |
| 23   | Q8BVQ5   | Protein phosphatase methylesterase 1                  |
| 14   | P62137   | Serine/threonine-protein phosphatase PP1-alpha cat    |
| 279  | P62141   | Serine/threonine-protein phosphatase PP1-beta cata    |
| 3    | P63087   | Serine/threonine-protein phosphatase PP1-gamma c      |
| 190  | Q9DBR7-2 | Protein phosphatase 1 regulatory subunit 12A          |
| 13   | Q8BG95   | Protein phosphatase 1 regulatory subunit 12B          |
| 9    | Q3UMT1   | Protein phosphatase 1 regulatory subunit 12C          |
| 76   | Q91VC7   | Protein phosphatase 1 regulatory subunit 14A          |
| 50   | Q3UM45   | Protein phosphatase 1 regulatory subunit 7            |
| 46   | P63330   | Serine/threonine-protein phosphatase 2A catalytic su  |
| 406  | Q76MZ3   | Serine/threonine-protein phosphatase 2A 65 kDa reg    |
| 35   | Q6P1F6   | Serine/threonine-protein phosphatase 2A 55 kDa reg    |
| 71   | P58389   | Serine/threonine-protein phosphatase 2A activator     |
| 6    | Q6PD03   | Serine/threonine-protein phosphatase 2A 56 kDa reg    |
| 23   | Q60996-2 | Serine/threonine-protein phosphatase 2A 56 kDa reg    |
| 2    | Q9CQR6   | Serine/threonine-protein phosphatase 6 catalytic sub  |
| 7    | Q922D4-4 | Serine/threonine-protein phosphatase 6 regulatory s   |
| 42   | O88531   | Palmitoyl-protein thioesterase 1                      |
| 23   | Q9JIG8   | PRA1 family protein 2                                 |
| 343  | P35700   | Peroxiredoxin-1                                       |
| 170  | Q61171   | Peroxiredoxin-2                                       |
| 60   | P20108   | Thioredoxin-dependent peroxide reductase, mitoch      |
| 77   | O08807   | Peroxiredoxin-4                                       |
| 211  | P99029-2 | Peroxiredoxin-5, mitochondrial                        |
| 234  | O08709   | Peroxiredoxin-6                                       |
| 1022 | Q9JK53   | Prolargin                                             |
| 20   | Q9QUR6   | Prolyl endopeptidase                                  |
| 31   | Q5EG47   | 5-AMP-activated protein kinase catalytic subunit alph |
| 28   | P05132-2 | cAMP-dependent protein kinase catalytic subunit alp   |
| 22   | O54950   | 5-AMP-activated protein kinase subunit gamma-1        |
| 40   | Q9DBC7   | cAMP-dependent protein kinase type I-alpha regulat    |
| 32   | P12367   | cAMP-dependent protein kinase type II-alpha regulat   |
| 15   | P31324   | cAMP-dependent protein kinase type II-beta regulat    |
| 5    | P20444   | Protein kinase C alpha type                           |
| 21   | P28867   | Protein kinase C delta type                           |
| 176  | Q91VJ2   | Protein kinase C delta-binding protein                |
| 14   | O08795   | Glucosidase 2 subunit beta                            |

|     |          |                                                      |
|-----|----------|------------------------------------------------------|
| 82  | P0C605-2 | cGMP-dependent protein kinase 1                      |
| 2   | Q9WTX2   | Interferon-inducible double-stranded RNA-dependen    |
| 6   | P33587   | Vitamin K-dependent protein C                        |
| 13  | Q64695   | Endothelial protein C receptor                       |
| 31  | Q9Z2Y8   | Proline synthase co-transcribed bacterial homolog pr |
| 20  | Q99KP6   | Pre-mRNA-processing factor 19                        |
| 40  | P15331-3 | Peripherin                                           |
| 35  | Q9D7G0   | Ribose-phosphate pyrophosphokinase 1                 |
| 24  | Q9D0M1   | Phosphoribosyl pyrophosphate synthase-associated p   |
| 110 | Q61207   | Prosaposin                                           |
| 90  | Q9R1P4   | Proteasome subunit alpha type-1                      |
| 75  | P49722   | Proteasome subunit alpha type-2                      |
| 36  | O70435   | Proteasome subunit alpha type-3                      |
| 55  | Q9Z2U1   | Proteasome subunit alpha type-5                      |
| 82  | Q9QUM9   | Proteasome subunit alpha type-6                      |
| 57  | Q9Z2U0   | Proteasome subunit alpha type-7                      |
| 82  | O09061   | Proteasome subunit beta type-1                       |
| 57  | Q9R1P3   | Proteasome subunit beta type-2                       |
| 48  | Q9R1P1   | Proteasome subunit beta type-3                       |
| 31  | P99026   | Proteasome subunit beta type-4                       |
| 20  | O55234   | Proteasome subunit beta type-5                       |
| 24  | Q60692   | Proteasome subunit beta type-6                       |
| 21  | P70195   | Proteasome subunit beta type-7                       |
| 34  | P46471   | 26S protease regulatory subunit 7                    |
| 63  | O88685   | 26S protease regulatory subunit 6A                   |
| 47  | P62196   | 26S protease regulatory subunit 8                    |
| 61  | P62334   | 26S protease regulatory subunit 10B                  |
| 57  | Q3TXS7   | 26S proteasome non-ATPase regulatory subunit 1       |
| 90  | Q8BG32   | 26S proteasome non-ATPase regulatory subunit 11      |
| 38  | Q9D8W5   | 26S proteasome non-ATPase regulatory subunit 12      |
| 37  | Q9WVJ2   | 26S proteasome non-ATPase regulatory subunit 13      |
| 45  | O35593   | 26S proteasome non-ATPase regulatory subunit 14      |
| 33  | P14685   | 26S proteasome non-ATPase regulatory subunit 3       |
| 7   | O35226   | 26S proteasome non-ATPase regulatory subunit 4       |
| 59  | Q8BJY1   | 26S proteasome non-ATPase regulatory subunit 5       |
| 13  | Q99JI4   | 26S proteasome non-ATPase regulatory subunit 6       |
| 89  | P26516   | 26S proteasome non-ATPase regulatory subunit 7       |
| 28  | Q9CX56   | 26S proteasome non-ATPase regulatory subunit 8       |
| 10  | Q9CR00   | 26S proteasome non-ATPase regulatory subunit 9       |
| 118 | P97371   | Proteasome activator complex subunit 1               |
| 5   | Q9JK23   | Proteasome assembly chaperone 1                      |

|     |          |                                                    |
|-----|----------|----------------------------------------------------|
| 209 | P17225   | Polypyrimidine tract-binding protein 1             |
| 3   | Q91Z31   | Polypyrimidine tract-binding protein 2             |
| 1   | Q14C51   | Pentatricopeptide repeat domain-containing protein |
| 2   | Q60866-2 | Phosphotriesterase-related protein                 |
| 10  | Q8BWM0   | Prostaglandin E synthase 2                         |
| 42  | Q9R0Q7   | Prostaglandin E synthase 3                         |
| 4   | Q9WV91   | Prostaglandin F2 receptor negative regulator       |
| 532 | O35074   | Prostacyclin synthase                              |
| 13  | Q91YR9   | Prostaglandin reductase 1                          |
| 9   | Q8VDQ1-2 | Prostaglandin reductase 2                          |
| 15  | P22437   | Prostaglandin G/H synthase 1                       |
| 16  | Q9D0J8   | Parathyrosin                                       |
| 14  | O70274   | Protein tyrosine phosphatase type IVA 2            |
| 34  | P35235-2 | Tyrosine-protein phosphatase non-receptor type 11  |
| 3   | Q6PB44-2 | Tyrosine-protein phosphatase non-receptor type 23  |
| 2   | P06800-6 | Receptor-type tyrosine-protein phosphatase C       |
| 30  | Q8R2Y8   | Peptidyl-tRNA hydrolase 2, mitochondrial           |
| 12  | Q3UEB3-3 | Poly(U)-binding-splicing factor PUF60              |
| 50  | P42669   | Transcriptional activator protein Pur-alpha        |
| 20  | Q3UQ28   | Peroxidasin homolog                                |
| 46  | Q8VI36-2 | Paxillin                                           |
| 302 | Q8C194   | Glycogen phosphorylase, brain form                 |
| 41  | Q9ET01   | Glycogen phosphorylase, liver form                 |
| 330 | Q9WUB3   | Glycogen phosphorylase, muscle form                |
| 92  | Q8BML9   | Glutamine-tRNA ligase                              |
| 49  | Q8BVI4   | Dihydropteridine reductase                         |
| 32  | Q8R404   | Protein QIL1                                       |
| 4   | Q9QYS9-8 | Protein quaking                                    |
| 43  | P61027   | Ras-related protein Rab-10                         |
| 43  | P46638   | Ras-related protein Rab-11B                        |
| 12  | P35283   | Ras-related protein Rab-12                         |
| 30  | Q91V41   | Ras-related protein Rab-14                         |
| 35  | P35293   | Ras-related protein Rab-18                         |
| 104 | P62821   | Ras-related protein Rab-1A                         |
| 55  | Q9D1G1   | Ras-related protein Rab-1B                         |
| 30  | P35282   | Ras-related protein Rab-21                         |
| 16  | Q99P58   | Ras-related protein Rab-27B                        |
| 13  | P53994   | Ras-related protein Rab-2A                         |
| 11  | Q64008   | Ras-related protein Rab-34                         |
| 20  | Q6PHN9   | Ras-related protein Rab-35                         |
| 7   | Q9CQD1   | Ras-related protein Rab-5A                         |

|     |          |                                              |
|-----|----------|----------------------------------------------|
| 80  | P61021   | Ras-related protein Rab-5B                   |
| 32  | P35278   | Ras-related protein Rab-5C                   |
| 29  | P61294   | Ras-related protein Rab-6B                   |
| 95  | P51150   | Ras-related protein Rab-7a                   |
| 5   | P55258   | Ras-related protein Rab-8A                   |
| 5   | P61028   | Ras-related protein Rab-8B                   |
| 143 | P63001   | Ras-related C3 botulinum toxin substrate 1   |
| 17  | P54728   | UV excision repair protein RAD23 homolog B   |
| 18  | P63321   | Ras-related protein Ral-A                    |
| 5   | Q64012-2 | RNA-binding protein Raly                     |
| 34  | P34022   | Ran-specific GTPase-activating protein       |
| 16  | Q9ERU9   | E3 SUMO-protein ligase RanBP2                |
| 6   | P46061   | Ran GTPase-activating protein 1              |
| 35  | P62835   | Ras-related protein Rap-1A                   |
| 148 | Q99JI6   | Ras-related protein Rap-1b                   |
| 3   | Q8BU31   | Ras-related protein Rap-2c                   |
| 15  | Q9DD06   | Retinoic acid receptor responder protein 2   |
| 95  | Q9D0I9   | Arginine--tRNA ligase, cytoplasmic           |
| 9   | Q9CW46   | Ribonucleoprotein PTB-binding 1              |
| 46  | Q60972   | Histone-binding protein RBBP4                |
| 2   | Q60973   | Histone-binding protein RBBP7                |
| 82  | O88851   | Putative hydrolase RBBP9                     |
| 6   | Q8C2Q3   | RNA-binding protein 14                       |
| 10  | Q8R3C6   | Probable RNA-binding protein 19              |
| 9   | B2RY56   | RNA-binding protein 25                       |
| 40  | O89086   | RNA-binding protein 3                        |
| 17  | Q8VH51-2 | RNA-binding protein 39                       |
| 16  | Q91VM5   | RNA binding motif protein, X-linked-like-1   |
| 190 | Q00915   | Retinol-binding protein 1                    |
| 15  | Q00724   | Retinol-binding protein 4                    |
| 67  | Q9WVB0   | RNA-binding protein with multiple splicing   |
| 8   | Q8VC52   | RNA-binding protein with multiple splicing 2 |
| 11  | Q8VE37   | Regulator of chromosome condensation         |
| 9   | Q8BP92   | Reticulocalbin-2                             |
| 41  | Q8BH97   | Reticulocalbin-3                             |
| 11  | Q9QYF1   | Retinol dehydrogenase 11                     |
| 7   | Q9ERI6   | Retinol dehydrogenase 14                     |
| 29  | P26043   | Radixin                                      |
| 17  | Q60870   | Receptor expression-enhancing protein 5      |
| 12  | Q9D8S4   | Oligoribonuclease, mitochondrial             |
| 10  | Q99PG4   | Regulator of G-protein signaling 18          |



|     |          |                                             |
|-----|----------|---------------------------------------------|
| 186 | Q9QUI0   | Transforming protein RhoA                   |
| 13  | P62746   | Rho-related GTP-binding protein RhoB        |
| 8   | Q62159   | Rho-related GTP-binding protein RhoC        |
| 3   | Q8R527   | Rho-related GTP-binding protein RhoQ        |
| 24  | Q9JJC6   | RILP-like protein 1                         |
| 18  | Q9DCV4   | Regulator of microtubule dynamics protein 1 |
| 16  | Q3UJU9   | Regulator of microtubule dynamics protein 3 |
| 194 | Q91VI7   | Ribonuclease inhibitor                      |
| 46  | Q8VCT3   | Aminopeptidase B                            |
| 110 | P70335-2 | Rho-associated protein kinase 1             |
| 43  | P70336   | Rho-associated protein kinase 2             |
| 1   | Q8VEE0   | Ribulose-phosphate 3-epimerase              |
| 73  | Q6ZWW3   | 60S ribosomal protein L10                   |
| 68  | P53026   | 60S ribosomal protein L10a                  |
| 16  | Q9CXW4   | 60S ribosomal protein L11                   |
| 55  | P35979   | 60S ribosomal protein L12                   |
| 100 | P47963   | 60S ribosomal protein L13                   |
| 25  | P19253   | 60S ribosomal protein L13a                  |
| 66  | Q9CR57   | 60S ribosomal protein L14                   |
| 94  | Q9CZM2   | 60S ribosomal protein L15                   |
| 62  | Q9CPR4   | 60S ribosomal protein L17                   |
| 39  | P35980   | 60S ribosomal protein L18                   |
| 32  | P62717   | 60S ribosomal protein L18a                  |
| 31  | P84099   | 60S ribosomal protein L19                   |
| 21  | O09167   | 60S ribosomal protein L21                   |
| 33  | P67984   | 60S ribosomal protein L22                   |
| 21  | P62830   | 60S ribosomal protein L23                   |
| 46  | P62751   | 60S ribosomal protein L23a                  |
| 79  | Q8BP67   | 60S ribosomal protein L24                   |
| 19  | P61255   | 60S ribosomal protein L26                   |
| 30  | P61358   | 60S ribosomal protein L27                   |
| 49  | P14115   | 60S ribosomal protein L27a                  |
| 3   | P41105   | 60S ribosomal protein L28                   |
| 105 | P27659   | 60S ribosomal protein L3                    |
| 17  | P62889   | 60S ribosomal protein L30                   |
| 16  | P62900   | 60S ribosomal protein L31                   |
| 52  | P62911   | 60S ribosomal protein L32                   |
| 9   | Q9D1R9   | 60S ribosomal protein L34                   |
| 16  | Q6ZWW7   | 60S ribosomal protein L35                   |
| 27  | O55142   | 60S ribosomal protein L35a                  |
| 17  | P47964   | 60S ribosomal protein L36                   |

|     |          |                                                      |
|-----|----------|------------------------------------------------------|
| 2   | P61514   | 60S ribosomal protein L37a                           |
| 34  | Q9JJI8   | 60S ribosomal protein L38                            |
| 25  | P62892   | 60S ribosomal protein L39                            |
| 250 | Q9D8E6   | 60S ribosomal protein L4                             |
| 64  | P47962   | 60S ribosomal protein L5                             |
| 111 | P47911   | 60S ribosomal protein L6                             |
| 130 | P14148   | 60S ribosomal protein L7                             |
| 140 | P12970   | 60S ribosomal protein L7a                            |
| 33  | P62918   | 60S ribosomal protein L8                             |
| 32  | P51410   | 60S ribosomal protein L9                             |
| 130 | P14869   | 60S acidic ribosomal protein P0                      |
| 77  | P47955   | 60S acidic ribosomal protein P1                      |
| 105 | P99027   | 60S acidic ribosomal protein P2                      |
| 202 | Q91YQ5   | Dolichyl-diphosphooligosaccharide--protein glycosylt |
| 104 | Q9DBG6   | Dolichyl-diphosphooligosaccharide--protein glycosylt |
| 51  | P63325   | 40S ribosomal protein S10                            |
| 40  | P62281   | 40S ribosomal protein S11                            |
| 97  | P63323   | 40S ribosomal protein S12                            |
| 152 | P62301   | 40S ribosomal protein S13                            |
| 26  | P62264   | 40S ribosomal protein S14                            |
| 86  | P62843   | 40S ribosomal protein S15                            |
| 56  | P62245   | 40S ribosomal protein S15a                           |
| 3   | P14131   | 40S ribosomal protein S16                            |
| 36  | P63276   | 40S ribosomal protein S17                            |
| 51  | P62270   | 40S ribosomal protein S18                            |
| 54  | Q9CZX8   | 40S ribosomal protein S19                            |
| 85  | P25444   | 40S ribosomal protein S2                             |
| 49  | P60867   | 40S ribosomal protein S20                            |
| 1   | Q9CQR2   | 40S ribosomal protein S21                            |
| 27  | P62267   | 40S ribosomal protein S23                            |
| 42  | P62849-2 | 40S ribosomal protein S24                            |
| 40  | P62852   | 40S ribosomal protein S25                            |
| 41  | P62855   | 40S ribosomal protein S26                            |
| 54  | P62983   | Ubiquitin-40S ribosomal protein S27a                 |
| 21  | Q6ZWY3   | 40S ribosomal protein S27-like                       |
| 1   | P62858   | 40S ribosomal protein S28                            |
| 14  | P62274   | 40S ribosomal protein S29                            |
| 72  | P62908   | 40S ribosomal protein S3                             |
| 139 | P97351   | 40S ribosomal protein S3a                            |
| 158 | P62702   | 40S ribosomal protein S4, X isoform                  |
| 78  | P97461   | 40S ribosomal protein S5                             |

|     |          |                                                        |
|-----|----------|--------------------------------------------------------|
| 14  | P62754   | 40S ribosomal protein S6                               |
| 12  | P18654   | Ribosomal protein S6 kinase alpha-3                    |
| 84  | P62082   | 40S ribosomal protein S7                               |
| 75  | P62242   | 40S ribosomal protein S8                               |
| 75  | Q6ZWN5   | 40S ribosomal protein S9                               |
| 169 | P14206   | 40S ribosomal protein SA                               |
| 5   | Q8K4Q0-3 | Regulatory-associated protein of mTOR                  |
| 16  | O88667   | GTP-binding protein RAD                                |
| 107 | P10833   | Ras-related protein R-Ras                              |
| 126 | Q99PL5   | Ribosome-binding protein 1                             |
| 393 | Q01730   | Ras suppressor protein 1                               |
| 17  | Q9D7H3   | RNA 3-terminal phosphate cyclase                       |
| 50  | Q99LF4   | tRNA-splicing ligase RtcB homolog                      |
| 13  | Q8K0T0   | Reticulon-1                                            |
| 3   | O70622-2 | Reticulon-2                                            |
| 13  | Q9ES97-3 | Reticulon-3                                            |
| 6   | Q99P72   | Reticulon-4                                            |
| 93  | Q99P72-5 | Reticulon-4                                            |
| 69  | Q9CQE8   | RNA transcription, translation ad transport factor pro |
| 1   | Q8BIJ7   | RUN and FYVE domain-containing protein 1               |
| 40  | P60122   | RuvB-like 1                                            |
| 1   | E9PZQ0   | Ryanodine receptor 1                                   |
| 10  | P56565   | Protein S100-A1                                        |
| 119 | P50543   | Protein S100-A11                                       |
| 8   | P97352   | Protein S100-A13                                       |
| 97  | P07091   | Protein S100-A4                                        |
| 10  | P63084   | Protein S100-A5                                        |
| 46  | P14069   | Protein S100-A6                                        |
| 1   | Q9D2C2-2 | Protein SAAL1                                          |
| 28  | Q9EP69   | Phosphatidylinositide phosphatase SAC1                 |
| 43  | Q9R1T2   | SUMO-activating enzyme subunit 1                       |
| 16  | Q80YR5   | Scaffold attachment factor B2                          |
| 41  | Q8BGH2   | Sorting and assembly machinery component 50 hom        |
| 59  | P36536   | GTP-binding protein SAR1a                              |
| 7   | Q9CQC9   | GTP-binding protein SAR1b                              |
| 62  | P26638   | Serine--tRNA ligase, cytoplasmic                       |
| 5   | Q8K021   | Secretory carrier-associated membrane protein 1        |
| 5   | Q8K299-3 | Scavenger receptor class A member 5                    |
| 21  | O35114   | Lysosome membrane protein 2                            |
| 27  | Q8R127   | Saccharopine dehydrogenase-like oxidoreductase         |
| 32  | Q8BRF7   | Sec1 family domain-containing protein 1                |

|     |          |                                                       |
|-----|----------|-------------------------------------------------------|
| 14  | Q78YZ6-3 | Short coiled-coil protein                             |
| 41  | P32020-2 | Non-specific lipid-transfer protein                   |
| 17  | Q920A5   | Retinoid-inducible serine carboxypeptidase            |
| 21  | Q9CZC8   | Secernin-1                                            |
| 3   | Q8VCA8   | Secernin-2                                            |
| 38  | Q66PY1   | Signal peptide, CUB and EGF-like domain-containing p  |
| 151 | Q8K2B3   | Succinate dehydrogenase [ubiquinone] flavoprotein s   |
| 105 | Q9CQA3   | Succinate dehydrogenase [ubiquinone] iron-sulfur su   |
| 38  | Q9CZB0   | Succinate dehydrogenase cytochrome b560 subunit,      |
| 15  | Q9CXV1   | Succinate dehydrogenase [ubiquinone] cytochrome b     |
| 17  | Q9R0P6   | Signal peptidase complex catalytic subunit SEC11A     |
| 9   | Q9D1M0   | Protein SEC13 homolog                                 |
| 60  | O08547   | Vesicle-trafficking protein SEC22b                    |
| 137 | Q01405   | Protein transport protein Sec23A                      |
| 12  | Q9D662   | Protein transport protein Sec23B                      |
| 10  | Q6NZC7   | SEC23-interacting protein                             |
| 162 | Q3UPL0-2 | Protein transport protein Sec31A                      |
| 20  | Q3TZ89-2 | Protein transport protein Sec31B                      |
| 30  | P61620   | Protein transport protein Sec61 subunit alpha isoform |
| 209 | P17563   | Selenium-binding protein 1                            |
| 4   | Q8VHC3   | Selenoprotein M                                       |
| 1   | Q9DBC0   | Selenoprotein O                                       |
| 3   | P62342   | Selenoprotein T                                       |
| 4   | Q8BH69   | Selenide, water dikinase 1                            |
| 15  | P70274   | Selenoprotein P                                       |
| 5   | Q8C1B7-3 | Septin-11                                             |
| 38  | Q9Z2Q6   | Septin-5                                              |
| 103 | O55131   | Septin-7                                              |
| 21  | Q8CHH9   | Septin-8                                              |
| 12  | Q9CY58-4 | Plasminogen activator inhibitor 1 RNA-binding protei  |
| 29  | P07758   | Alpha-1-antitrypsin 1-1                               |
| 54  | P22599   | Alpha-1-antitrypsin 1-2                               |
| 416 | Q00896   | Alpha-1-antitrypsin 1-3                               |
| 106 | Q00897   | Alpha-1-antitrypsin 1-4                               |
| 101 | Q00898   | Alpha-1-antitrypsin 1-5                               |
| 145 | P07759   | Serine protease inhibitor A3K                         |
| 16  | Q91WP6   | Serine protease inhibitor A3N                         |
| 3   | Q06770   | Corticosteroid-binding globulin                       |
| 7   | Q9D154   | Leukocyte elastase inhibitor A                        |
| 207 | Q60854   | Serpin B6                                             |
| 265 | P32261   | Antithrombin-III                                      |

|     |          |                                                       |
|-----|----------|-------------------------------------------------------|
| 32  | P49182   | Heparin cofactor 2                                    |
| 288 | Q07235   | Glia-derived nexin                                    |
| 56  | P97298   | Pigment epithelium-derived factor                     |
| 17  | Q61247   | Alpha-2-antiplasmin                                   |
| 56  | P97290   | Plasma protease C1 inhibitor                          |
| 23  | Q9EQU5-2 | Protein SET                                           |
| 5   | Q8VHL1   | Histone-lysine N-methyltransferase SETD7              |
| 40  | Q64213-2 | Splicing factor 1                                     |
| 7   | Q8K4Z5   | Splicing factor 3A subunit 1                          |
| 6   | Q62203   | Splicing factor 3A subunit 2                          |
| 21  | Q99NB9   | Splicing factor 3B subunit 1                          |
| 11  | Q921M3-2 | Splicing factor 3B subunit 3                          |
| 13  | Q8QZY9   | Splicing factor 3B subunit 4                          |
| 11  | O70456   | 14-3-3 protein sigma                                  |
| 110 | Q8VIJ6   | Splicing factor, proline- and glutamine-rich          |
| 29  | Q8C4U3   | Secreted frizzled-related protein 1                   |
| 19  | Q99JR1   | Sideroflexin-1                                        |
| 211 | Q91V61   | Sideroflexin-3                                        |
| 22  | P82350   | Alpha-sarcoglycan                                     |
| 28  | P82349   | Beta-sarcoglycan                                      |
| 55  | P82347   | Delta-sarcoglycan                                     |
| 66  | O70258   | Epsilon-sarcoglycan                                   |
| 10  | P82348   | Gamma-sarcoglycan                                     |
| 9   | Q8R0X7   | Sphingosine-1-phosphate lyase 1                       |
| 13  | Q8BJU0-2 | Small glutamine-rich tetratricopeptide repeat-contair |
| 111 | Q9JJU8   | SH3 domain-binding glutamic acid-rich-like protein    |
| 12  | Q91VW3   | SH3 domain-binding glutamic acid-rich-like protein 3  |
| 29  | Q7TSG5   | SH3 domain-containing protein 21                      |
| 5   | Q62419   | Endophilin-A2                                         |
| 14  | Q9JK48   | Endophilin-B1                                         |
| 11  | Q8R3V5-3 | Endophilin-B2                                         |
| 12  | O89032-3 | SH3 and PX domain-containing protein 2A               |
| 25  | Q9CZN7-2 | Serine hydroxymethyltransferase                       |
| 16  | Q61079   | Single-minded homolog 2                               |
| 2   | Q8VDQ8-3 | NAD-dependent protein deacetylase sirtuin-2           |
| 20  | Q9WTX5   | S-phase kinase-associated protein 1                   |
| 3   | Q924N4   | Solute carrier family 12 member 6                     |
| 6   | P51912   | Neutral amino acid transporter B(0)                   |
| 84  | Q8JZU2   | Tricarboxylate transport protein, mitochondrial       |
| 15  | Q9QZD8   | Mitochondrial dicarboxylate carrier                   |
| 66  | Q9CR62   | Mitochondrial 2-oxoglutarate/malate carrier protein   |

|     |          |                                                          |
|-----|----------|----------------------------------------------------------|
| 81  | Q8BH59   | Calcium-binding mitochondrial carrier protein Aralar1    |
| 33  | Q9Z2Z6   | Mitochondrial carnitine/acylcarnitine carrier protein    |
| 44  | Q8BMD8   | Calcium-binding mitochondrial carrier protein SCaMC      |
| 136 | Q8VEM8   | Phosphate carrier protein, mitochondrial                 |
| 421 | P48962   | ADP/ATP translocase 1                                    |
| 14  | Q8R0Y8   | Mitochondrial coenzyme A transporter SLC25A42            |
| 102 | P51881   | ADP/ATP translocase 2                                    |
| 5   | Q5HZI9   | Solute carrier family 25 member 51                       |
| 15  | Q60714   | Long-chain fatty acid transport protein 1                |
| 15  | Q9JIM1-2 | Equilibrative nucleoside transporter 1                   |
| 4   | P17809   | Solute carrier family 2, facilitated glucose transporter |
| 8   | P10852   | 4F2 cell-surface antigen heavy chain                     |
| 21  | Q8BY89-2 | Choline transporter-like protein 2                       |
| 210 | P04919-2 | Band 3 anion transport protein                           |
| 7   | Q8BTY2   | Sodium bicarbonate cotransporter 3                       |
| 26  | Q9WVB4   | Slit homolog 3 protein                                   |
| 145 | Q3URD3-4 | Sarcolemmal membrane-associated protein                  |
| 2   | Q6DIC0   | Probable global transcription activator SNF2L2           |
| 16  | Q91ZW3   | SWI/SNF-related matrix-associated actin-dependent        |
| 17  | Q6PDG5-2 | SWI/SNF complex subunit SMARCC2                          |
| 25  | Q9CU62   | Structural maintenance of chromosomes protein 1A         |
| 8   | Q9CW03   | Structural maintenance of chromosomes protein 3          |
| 2   | Q9DB10   | Essential MCU regulator, mitochondrial                   |
| 79  | Q8BLY1-2 | SPARC-related modular calcium-binding protein 1          |
| 15  | Q6ZPR5-3 | Sphingomyelin phosphodiesterase 4                        |
| 2   | P70158   | Acid sphingomyelinase-like phosphodiesterase 3a          |
| 15  | P58242   | Acid sphingomyelinase-like phosphodiesterase 3b          |
| 23  | Q3UKJ7-2 | WD40 repeat-containing protein SMU1                      |
| 14  | Q9Z0F7   | Gamma-synuclein                                          |
| 88  | Q78PY7   | Staphylococcal nuclease domain-containing protein 1      |
| 43  | Q6P4T2   | U5 small nuclear ribonucleoprotein 200 kDa helicase      |
| 20  | Q62376-2 | U1 small nuclear ribonucleoprotein 70 kDa                |
| 15  | Q62189   | U1 small nuclear ribonucleoprotein A                     |
| 12  | Q9CQI7   | U2 small nuclear ribonucleoprotein B                     |
| 16  | P62315   | Small nuclear ribonucleoprotein Sm D1                    |
| 29  | P62320   | Small nuclear ribonucleoprotein Sm D3                    |
| 17  | P62305   | Small nuclear ribonucleoprotein E                        |
| 18  | P62307   | Small nuclear ribonucleoprotein F                        |
| 12  | P62309   | Small nuclear ribonucleoprotein G                        |
| 20  | Q61234   | Alpha-1-syntrophin                                       |
| 117 | Q99L88   | Beta-1-syntrophin                                        |

|     |          |                                                    |
|-----|----------|----------------------------------------------------|
| 102 | Q61235   | Beta-2-syntrophin                                  |
| 34  | O70493   | Sorting nexin-12                                   |
| 1   | Q8BVL3   | Sorting nexin-17                                   |
| 89  | Q91ZR2   | Sorting nexin-18                                   |
| 9   | Q9CWK8   | Sorting nexin-2                                    |
| 19  | O70492   | Sorting nexin-3                                    |
| 10  | Q91YJ2   | Sorting nexin-4                                    |
| 21  | Q9D8U8   | Sorting nexin-5                                    |
| 2   | Q6P8X1   | Sorting nexin-6                                    |
| 40  | Q91VH2   | Sorting nexin-9                                    |
| 62  | P08228   | Superoxide dismutase [Cu-Zn]                       |
| 111 | P09671   | Superoxide dismutase [Mn], mitochondrial           |
| 348 | O09164   | Extracellular superoxide dismutase [Cu-Zn]         |
| 144 | Q62417-2 | Sorbin and SH3 domain-containing protein 1         |
| 185 | Q3UTJ2-4 | Sorbin and SH3 domain-containing protein 2         |
| 33  | Q9R1Z8   | Vinexin                                            |
| 29  | Q64442   | Sorbitol dehydrogenase                             |
| 99  | Q99P68   | Sclerostin                                         |
| 9   | Q58A65-6 | C-Jun-amino-terminal kinase-interacting protein 4  |
| 4   | P70663   | SPARC-like protein 1                               |
| 4   | Q9CYN2   | Signal peptidase complex subunit 2                 |
| 13  | Q8VCC9   | Spondin-1                                          |
| 57  | Q64105   | Sepiapterin reductase                              |
| 173 | P08032   | Spectrin alpha chain, erythrocytic 1               |
| 904 | P16546-2 | Spectrin alpha chain, non-erythrocytic 1           |
| 106 | P15508   | Spectrin beta chain, erythrocytic                  |
| 762 | Q62261   | Spectrin beta chain, non-erythrocytic 1            |
| 95  | Q6P069-2 | Sorcin                                             |
| 10  | Q64674   | Spermidine synthase                                |
| 1   | P16254   | Signal recognition particle 14 kDa protein         |
| 25  | P14576   | Signal recognition particle 54 kDa protein         |
| 26  | Q9R0M3-2 | Sushi-repeat-containing protein SRPX               |
| 12  | Q52KI8-2 | Serine/arginine repetitive matrix protein 1        |
| 7   | Q99MR6-3 | Serrate RNA effector molecule homolog              |
| 10  | Q6PDM2-3 | Serine/arginine-rich splicing factor 1             |
| 19  | Q9R0U0-3 | Serine/arginine-rich splicing factor 10            |
| 18  | Q62093   | Serine/arginine-rich splicing factor 2             |
| 15  | Q3TWW8   | Serine/arginine-rich splicing factor 6             |
| 16  | Q8BL97-3 | Serine/arginine-rich splicing factor 7             |
| 46  | P32067   | Lupus La protein homolog                           |
| 11  | Q9CYR0   | Single-stranded DNA-binding protein, mitochondrial |

|      |          |                                                                |
|------|----------|----------------------------------------------------------------|
| 14   | Q62147   | Sarcospan                                                      |
| 16   | Q9CY50   | Translocon-associated protein subunit alpha                    |
| 9    | Q62186   | Translocon-associated protein subunit delta                    |
| 57   | Q99L47   | Hsc70-interacting protein                                      |
| 8    | O88829-2 | Lactosylceramide alpha-2,3-sialyltransferase                   |
| 23   | P42227-2 | Signal transducer and activator of transcription 3             |
| 10   | Q8CI59   | Metalloreductase STEAP3                                        |
| 28   | P70302   | Stromal interaction molecule 1                                 |
| 144  | Q60864   | Stress-induced-phosphoprotein 1                                |
| 71   | Q99KH8   | Serine/threonine-protein kinase 24                             |
| 3    | Q9Z1W9   | STE20/SPS1-related proline-alanine-rich protein kinase         |
| 65   | P54116   | Erythrocyte band 7 integral membrane protein                   |
| 14   | Q99JB2   | Stomatin-like protein 2, mitochondrial                         |
| 4    | Q8CDJ8   | Stonin-1                                                       |
| 9    | Q9Z1Z2   | Serine-threonine kinase receptor-associated protein            |
| 9    | P50427   | Steryl-sulfatase                                               |
| 7    | P46978   | Dolichyl-diphosphooligosaccharide--protein glycosyltransferase |
| 17   | Q3TDQ1   | Dolichyl-diphosphooligosaccharide--protein glycosyltransferase |
| 20   | Q9ER00   | Syntaxin-12                                                    |
| 7    | Q8BVI5   | Syntaxin-16                                                    |
| 11   | O70439   | Syntaxin-7                                                     |
| 64   | Q60770-2 | Syntaxin-binding protein 3                                     |
| 106  | Q9Z2I9   | Succinyl-CoA ligase [ADP-forming] subunit beta, mitochondrial  |
| 144  | Q9WUM5   | Succinyl-CoA ligase [ADP/GDP-forming] subunit alpha            |
| 73   | Q9Z2I8-2 | Succinyl-CoA ligase [GDP-forming] subunit beta, mitochondrial  |
| 11   | Q9CX34   | Suppressor of G2 allele of SKP1 homolog                        |
| 1    | Q8K007   | Extracellular sulfatase Sulf-1                                 |
| 14   | Q9D666-5 | SUN domain-containing protein 1                                |
| 102  | Q8BJS4-3 | SUN domain-containing protein 2                                |
| 1    | Q8R086   | Sulfite oxidase, mitochondrial                                 |
| 36   | Q64310   | Surfeit locus protein 4                                        |
| 102  | Q9DBX3   | Sushi domain-containing protein 2                              |
| 30   | Q8K4L3   | Supervillin                                                    |
| 3    | Q9EPM5-3 | Syncoilin                                                      |
| 71   | Q7TMK9-2 | Heterogeneous nuclear ribonucleoprotein Q                      |
| 54   | Q6ZWR6-4 | Nesprin-1                                                      |
| 5    | Q6ZWQ0   | Nesprin-2                                                      |
| 12   | Q70IV5-2 | Synemin                                                        |
| 99   | Q8CC35-2 | Synaptopodin                                                   |
| 1331 | P37804   | Transgelin                                                     |
| 10   | Q9R1Q8   | Transgelin-3                                                   |



|      |          |                                                      |
|------|----------|------------------------------------------------------|
| 91   | Q93092   | Transaldolase                                        |
| 14   | Q9R233-2 | Tapasin                                              |
| 57   | Q921F2   | TAR DNA-binding protein 43                           |
| 32   | Q9D0R2   | Threonine--tRNA ligase, cytoplasmic                  |
| 8    | Q60949-2 | TBC1 domain family member 1                          |
| 9    | Q8BYA0   | Tubulin-specific chaperone D                         |
| 11   | P10711   | Transcription elongation factor A protein 1          |
| 35   | P83940   | Transcription elongation factor B polypeptide 1      |
| 36   | P62869   | Transcription elongation factor B polypeptide 2      |
| 4    | O88968   | Transcobalamin-2                                     |
| 146  | P11983   | T-complex protein 1 subunit alpha                    |
| 98   | P47226-2 | Testin                                               |
| 499  | Q921I1   | Serotransferrin                                      |
| 592  | Q62219   | Transforming growth factor beta-1-induced transcrip  |
| 339  | P82198   | Transforming growth factor-beta-induced protein ig-l |
| 554  | P21981   | Protein-glutamine gamma-glutamyltransferase 2        |
| 6    | P24529   | Tyrosine 3-monooxygenase                             |
| 100  | P35441   | Thrombospondin-1                                     |
| 9    | Q99J36   | THUMP domain-containing protein 1                    |
| 26   | P01831   | Thy-1 membrane glycoprotein                          |
| 8    | P62075   | Mitochondrial import inner membrane translocase su   |
| 14   | O35857   | Mitochondrial import inner membrane translocase su   |
| 16   | Q9D880   | Mitochondrial import inner membrane translocase su   |
| 16   | P39876   | Metalloproteinase inhibitor 3                        |
| 367  | Q99JR5   | Tubulointerstitial nephritis antigen-like            |
| 18   | P39447   | Tight junction protein ZO-1                          |
| 523  | P40142   | Transketolase                                        |
| 2582 | P26039   | Talin-1                                              |
| 39   | Q71LX4   | Talin-2                                              |
| 14   | Q921L3   | Transmembrane and coiled-coil domain-containing p    |
| 43   | Q9D1D4   | Transmembrane emp24 domain-containing protein 1      |
| 49   | Q9R0Q3   | Transmembrane emp24 domain-containing protein 2      |
| 18   | Q99KF1   | Transmembrane emp24 domain-containing protein 9      |
| 2    | Q9CQN6   | Transmembrane protein 14C                            |
| 6    | Q9CR64-2 | Protein kish-A                                       |
| 144  | Q9DBS1   | Transmembrane protein 43                             |
| 2    | P49813   | Tropomodulin-1                                       |
| 46   | Q9JHJ0   | Tropomodulin-3                                       |
| 103  | Q61029-2 | Lamina-associated polypeptide 2, isoforms beta/delt  |
| 16   | Q61033   | Lamina-associated polypeptide 2, isoforms alpha/zet  |
| 4    | Q6ZWY8   | Thymosin beta-10                                     |

|     |          |                                                    |
|-----|----------|----------------------------------------------------|
| 121 | P20065-2 | Thymosin beta-4                                    |
| 11  | Q8BRH0   | Transmembrane and TPR repeat-containing protein 3  |
| 13  | Q8VBT0   | Thioredoxin-related transmembrane protein 1        |
| 3   | Q9D710   | Thioredoxin-related transmembrane protein 2        |
| 12  | Q8C0L0   | Thioredoxin-related transmembrane protein 4        |
| 37  | Q80YX1-2 | Tenascin                                           |
| 6   | Q921Z5   | Tumor necrosis factor alpha-induced protein 8      |
| 54  | Q8BFY9-2 | Transportin-1                                      |
| 2   | Q99LG2   | Transportin-2                                      |
| 26  | Q6P2B1   | Transportin-3                                      |
| 152 | Q8CGB6-2 | Tensin-2                                           |
| 11  | O88746   | Target of Myb protein 1                            |
| 23  | Q5SRX1-3 | TOM1-like protein 2                                |
| 15  | Q9CPQ3   | Mitochondrial import receptor subunit TOM22 homo   |
| 4   | Q9CYG7-2 | Mitochondrial import receptor subunit TOM34        |
| 29  | Q9CZW5   | Mitochondrial import receptor subunit TOM70        |
| 16  | Q01320   | DNA topoisomerase 2-alpha                          |
| 31  | Q64511   | DNA topoisomerase 2-beta                           |
| 5   | Q921T2-3 | Torsin-1A-interacting protein 1                    |
| 1   | Q8BYU6   | Torsin-1A-interacting protein 2                    |
| 7   | Q9ER41   | Torsin-1B                                          |
| 3   | Q9ER38   | Torsin-3A                                          |
| 3   | Q62393-2 | Tumor protein D52                                  |
| 32  | Q9CYZ2   | Tumor protein D54                                  |
| 264 | P17751   | Triosephosphate isomerase                          |
| 466 | P58771-2 | Tropomyosin alpha-1 chain                          |
| 108 | P21107-2 | Tropomyosin alpha-3 chain                          |
| 64  | Q6IRU2   | Tropomyosin alpha-4 chain                          |
| 21  | O89023   | Tripeptidyl-peptidase 1                            |
| 2   | Q7TQD2   | Tubulin polymerization-promoting protein           |
| 136 | Q9CRB6   | Tubulin polymerization-promoting protein family me |
| 15  | F6ZDS4   | Nucleoprotein TPR                                  |
| 4   | Q8QZZ7   | EKC/KEOPS complex subunit Tprkb                    |
| 55  | P63028   | Translationally-controlled tumor protein           |
| 4   | Q9CQN1   | Heat shock protein 75 kDa, mitochondrial           |
| 12  | Q9CQP2   | Trafficking protein particle complex subunit 2     |
| 19  | O55013   | Trafficking protein particle complex subunit 3     |
| 15  | Q9D289   | Trafficking protein particle complex subunit 6B    |
| 4   | Q8BGX0-3 | E3 ubiquitin-protein ligase TRIM23                 |
| 43  | Q62318   | Transcription intermediary factor 1-beta           |
| 33  | Q8C0E3   | Tripartite motif-containing protein 47             |

|      |          |                                                     |
|------|----------|-----------------------------------------------------|
| 1    | Q0KL02-3 | Triple functional domain protein                    |
| 40   | Q8CJ53-4 | Cdc42-interacting protein 4                         |
| 10   | Q9DCG9   | Multifunctional methyltransferase subunit TRM112-li |
| 13   | Q8K1J6   | CCA tRNA nucleotidyltransferase 1, mitochondrial    |
| 23   | Q62348   | Translin                                            |
| 27   | Q9QZE7   | Translin-associated protein X                       |
| 10   | Q9DCK3   | Tetraspanin-4                                       |
| 6    | Q8BJU2   | Tetraspanin-9                                       |
| 36   | P50637   | Translocator protein                                |
| 32   | P52196   | Thiosulfate sulfurtransferase                       |
| 4    | Q80XJ3   | Tetratricopeptide repeat protein 28                 |
| 14   | A3KMP2   | Tetratricopeptide repeat protein 38                 |
| 6    | Q3UDE2   | Tubulin--tyrosine ligase-like protein 12            |
| 26   | A2ASS6   | Titin                                               |
| 47   | P68369   | Tubulin alpha-1A chain                              |
| 780  | P05213   | Tubulin alpha-1B chain                              |
| 42   | P68373   | Tubulin alpha-1C chain                              |
| 7    | P68368   | Tubulin alpha-4A chain                              |
| 84   | Q9CWF2   | Tubulin beta-2B chain                               |
| 59   | Q9ERD7   | Tubulin beta-3 chain                                |
| 12   | Q9D6F9   | Tubulin beta-4A chain                               |
| 1258 | P68372   | Tubulin beta-4B chain                               |
| 186  | P99024   | Tubulin beta-5 chain                                |
| 89   | Q8BFR5   | Elongation factor Tu, mitochondrial                 |
| 21   | Q91YR1   | Twinfilin-1                                         |
| 19   | Q9Z0P5-2 | Twinfilin-2                                         |
| 116  | P10639   | Thioredoxin                                         |
| 3    | P97493   | Thioredoxin, mitochondrial                          |
| 114  | Q91W90   | Thioredoxin domain-containing protein 5             |
| 37   | Q8CDN6   | Thioredoxin-like protein 1                          |
| 42   | Q9JMH6-2 | Thioredoxin reductase 1, cytoplasmic                |
| 19   | Q9D883   | Splicing factor U2AF 35 kDa subunit                 |
| 24   | P26369   | Splicing factor U2AF 65 kDa subunit                 |
| 44   | Q3TW96   | UDP-N-acetylhexosamine pyrophosphorylase-like prc   |
| 444  | Q02053   | Ubiquitin-like modifier-activating enzyme 1         |
| 9    | Q9Z1F9   | SUMO-activating enzyme subunit 2                    |
| 11   | Q8C878-2 | NEDD8-activating enzyme E1 catalytic subunit        |
| 9    | Q8VE47   | Ubiquitin-like modifier-activating enzyme 5         |
| 15   | Q80X50-2 | Ubiquitin-associated protein 2-like                 |
| 45   | P62838   | Ubiquitin-conjugating enzyme E2 D2                  |
| 8    | P63280   | SUMO-conjugating enzyme UBC9                        |

|     |          |                                                      |
|-----|----------|------------------------------------------------------|
| 5   | P61087   | Ubiquitin-conjugating enzyme E2 K                    |
| 54  | P68037   | Ubiquitin-conjugating enzyme E2 L3                   |
| 78  | P61089   | Ubiquitin-conjugating enzyme E2 N                    |
| 50  | Q9D2M8   | Ubiquitin-conjugating enzyme E2 variant 2            |
| 17  | Q80U95   | Ubiquitin-protein ligase E3C                         |
| 3   | E9Q735   | Ubiquitin conjugation factor E4 A                    |
| 2   | Q9ES00   | Ubiquitin conjugation factor E4 B                    |
| 11  | Q9EPV8   | Ubiquitin-like protein 5                             |
| 33  | Q8R317-2 | Ubiquilin-1                                          |
| 1   | Q9QZM0   | Ubiquilin-2                                          |
| 15  | A2AN08-3 | E3 ubiquitin-protein ligase UBR4                     |
| 24  | Q922Y1   | UBX domain-containing protein 1                      |
| 1   | Q99PL6-2 | UBX domain-containing protein 6                      |
| 103 | Q9R0P9   | Ubiquitin carboxyl-terminal hydrolase isozyme L1     |
| 3   | Q9JKB1   | Ubiquitin carboxyl-terminal hydrolase isozyme L3     |
| 136 | P12242   | Mitochondrial brown fat uncoupling protein 1         |
| 28  | Q9CR09   | Ubiquitin-fold modifier-conjugating enzyme 1         |
| 31  | P70362   | Ubiquitin fusion degradation protein 1 homolog       |
| 24  | P61961   | Ubiquitin-fold modifier 1                            |
| 72  | Q6P5E4   | UDP-glucose:glycoprotein glucosyltransferase 1       |
| 54  | Q91ZJ5   | UTP--glucose-1-phosphate uridylyltransferase         |
| 8   | Q62452   | UDP-glucuronosyltransferase 1-9                      |
| 1   | P13439   | Uridine 5-monophosphate synthase                     |
| 111 | Q99KD5   | Protein unc-45 homolog A                             |
| 46  | Q9EPU0-2 | Regulator of nonsense transcripts 1                  |
| 19  | Q8R1I1   | Cytochrome b-c1 complex subunit 9                    |
| 35  | Q9CPX8   | Cytochrome b-c1 complex subunit 10                   |
| 44  | Q9D855   | Cytochrome b-c1 complex subunit 7                    |
| 195 | Q9CZ13   | Cytochrome b-c1 complex subunit 1, mitochondrial     |
| 310 | Q9DB77   | Cytochrome b-c1 complex subunit 2, mitochondrial     |
| 104 | Q9CR68   | Cytochrome b-c1 complex subunit Rieske, mitochondr   |
| 17  | P99028   | Cytochrome b-c1 complex subunit 6, mitochondrial     |
| 78  | Q9CQ69   | Cytochrome b-c1 complex subunit 8                    |
| 16  | P70697   | Uroporphyrinogen decarboxylase                       |
| 4   | Q78IK2   | Up-regulated during skeletal muscle growth protein 5 |
| 19  | Q9Z1Z0-2 | General vesicular transport factor p115              |
| 23  | Q9JMA1   | Ubiquitin carboxyl-terminal hydrolase 14             |
| 1   | Q8R5H1-5 | Ubiquitin carboxyl-terminal hydrolase 15             |
| 16  | Q8C6M1   | Ubiquitin carboxyl-terminal hydrolase 20             |
| 9   | P35123   | Ubiquitin carboxyl-terminal hydrolase 4              |
| 120 | P56399   | Ubiquitin carboxyl-terminal hydrolase 5              |

|      |          |                                                      |
|------|----------|------------------------------------------------------|
| 8    | Q6A4J8-3 | Ubiquitin carboxyl-terminal hydrolase 7              |
| 16   | Q80WQ2   | Protein VAC14 homolog                                |
| 55   | Q9WV55   | Vesicle-associated membrane protein-associated pro   |
| 34   | Q9QY76   | Vesicle-associated membrane protein-associated pro   |
| 48   | Q9Z1Q9   | Valine--tRNA ligase                                  |
| 12   | Q9CZT5   | Vasorin                                              |
| 79   | P70460   | Vasodilator-stimulated phosphoprotein                |
| 185  | Q62465   | Synaptic vesicle membrane protein VAT-1 homolog      |
| 1    | Q80TB8   | Synaptic vesicle membrane protein VAT-1 homolog-li   |
| 17   | P61759   | Prefoldin subunit 3                                  |
| 124  | Q62059-4 | Versican core protein                                |
| 1671 | Q64727   | Vinculin                                             |
| 559  | Q01853   | Transitional endoplasmic reticulum ATPase            |
| 165  | Q60932-2 | Voltage-dependent anion-selective channel protein 1  |
| 103  | Q60930   | Voltage-dependent anion-selective channel protein 2  |
| 41   | Q60931   | Voltage-dependent anion-selective channel protein 3  |
| 2322 | P20152   | Vimentin                                             |
| 13   | Q9CRC0   | Vitamin K epoxide reductase complex subunit 1        |
| 12   | Q6TEK5   | Vitamin K epoxide reductase complex subunit 1-like ꞣ |
| 39   | Q9CQ80-2 | Vacuolar protein-sorting-associated protein 25       |
| 11   | Q8C0E2   | Vacuolar protein sorting-associated protein 26B      |
| 7    | Q9D1C8   | Vacuolar protein sorting-associated protein 28 homo  |
| 40   | Q9QZ88   | Vacuolar protein sorting-associated protein 29       |
| 6    | Q8BWQ6-2 | VPS35 endosomal protein-sorting factor-like          |
| 8    | Q91XD6   | Vacuolar protein-sorting-associated protein 36       |
| 1    | P97390   | Vacuolar protein sorting-associated protein 45       |
| 1    | Q8VEJ9   | Vacuolar protein sorting-associated protein 4A       |
| 46   | P46467   | Vacuolar protein sorting-associated protein 4B       |
| 13   | Q9CR26   | Vacuolar protein sorting-associated protein VTA1 hor |
| 71   | P29788   | Vitronectin                                          |
| 61   | Q8R2Z5   | von Willebrand factor A domain-containing protein 1  |
| 82   | Q99KC8   | von Willebrand factor A domain-containing protein 5  |
| 23   | Q3UR50-5 | von Willebrand factor A domain-containing protein 5  |
| 5    | Q8CC88   | von Willebrand factor A domain-containing protein 8  |
| 136  | Q8CIZ8   | von Willebrand factor                                |
| 22   | P32921-2 | Tryptophan--tRNA ligase, cytoplasmic                 |
| 11   | P97765   | WW domain-binding protein 2                          |
| 316  | O88342   | WD repeat-containing protein 1                       |
| 12   | Q8CGF6   | WD repeat-containing protein 47                      |
| 13   | Q9ERF3   | WD repeat-containing protein 61                      |
| 19   | P56695   | Wolframin                                            |

|     |          |                                                    |
|-----|----------|----------------------------------------------------|
| 87  | Q9Z0G4   | WNT1-inducible-signaling pathway protein 2         |
| 11  | Q6P1B1   | Xaa-Pro aminopeptidase 1                           |
| 60  | Q6P5F9   | Exportin-1                                         |
| 13  | Q3U4G3   | Xyloside xylosyltransferase 1                      |
| 33  | Q91WQ3   | Tyrosine--tRNA ligase, cytoplasmic                 |
| 4   | P62960   | Nuclease-sensitive element-binding protein 1       |
| 7   | Q04736   | Tyrosine-protein kinase Yes                        |
| 5   | Q9CQW1   | Synaptobrevin homolog YKT6                         |
| 81  | Q9CQV8-2 | 14-3-3 protein beta/alpha                          |
| 169 | P62259   | 14-3-3 protein epsilon                             |
| 132 | P61982   | 14-3-3 protein gamma                               |
| 69  | P68510   | 14-3-3 protein eta                                 |
| 105 | P68254-2 | 14-3-3 protein theta                               |
| 420 | P63101   | 14-3-3 protein zeta/delta                          |
| 12  | Q9ESL4-3 | Mitogen-activated protein kinase kinase kinase MLT |
| 2   | Q6ZPZ3-2 | Zinc finger CCCH domain-containing protein 4       |
| 2   | P23950   | Zinc finger protein 36, C3H1 type-like 1           |
| 11  | P16372   | Zinc finger protein 58                             |
| 4   | O54692   | Centromere/kinetochore protein zw10 homolog        |
| 406 | Q62523   | Zyxin                                              |

sferase

ε isozyme 1, mitochondrial

'delta-1

ibunit gamma-5

r 3

a-2

protein

ochondrial

r 1

ibunit gamma-12



4

5

AMHD1

(

)

unit TIM14

g

protein 1  
a

ndrial  
ndrial  
chondrial  
ndrial  
se, mitochondrial  
:ochondrial

cleus

phatase

|  
|

protein 10

log 1

unctional protein 1  
unctional protein 2

ase

chondrial  
ial  
ating], mitochondrial

member A  
member B  
member E

rotein 2

tein 1

ein

a-1

-1  
-3  
2  
3

chondrial  
hondrial  
e]] kinase, mitochondrial



protein, mitochondrial

.  
I subunit delta  
I subunit gamma

drial

o

e

stein

mitochondrial

stein 1

ochondrial  
ochondrial  
al

drial

mitochondrial

nit 6

nit 7

hain alpha-keto acid dehydrogenase complex, mitochondrial

2

ransferase 48 kDa subunit

se DHX15

ment of pyruvate dehydrogenase complex, mitochondrial

onent of 2-oxoglutarate dehydrogenase complex, mitochondrial

ndrial  
itochondrial

ll pathway, mitochondrial

n 1  
n 2



ent

linked

family member 1  
family member 3

like protein 2

ient protein 1

ndrial

ctase, mitochondrial



e type-1 subunit alpha

in 1

in

}

ndrial

·  
·  
a-1  
a-2  
ra  
ra  
ra  
ra isoforms short  
bunit beta-1  
bunit beta-2  
ke 1

plasmic

mitochondrial

L

n  
r  
|  
n

rial

ning protein 2

substrate

ndrial

staining protein 5

:ein 1  
:ein 2



glycan core protein

mitochondrial  
cytochrome

labile subunit

protein  
ta

repeat protein

chondrial

ein 2

ion-associated protein 1

tochondrial

ein 1  
n protein 1  
n protein 2

L

drial

ein 1  
ein 2  
ein 3  
ein 4

r

\  
}

ise 1  
ise 3  
ise 4

r 2

ochondrial  
ondrial

olog

in 6

ial

se

hondrial

D88

ha



lex subunit 1  
lex subunit 10, mitochondrial  
lex subunit 11  
lex subunit 12  
lex subunit 13  
lex subunit 2  
lex subunit 3

lex subunit 5  
lex subunit 6  
lex subunit 8  
lex subunit 9, mitochondrial  
lex assembly factor 4  
bly factor 7  
ex subunit 1  
ex subunit 10  
ex subunit 3  
ex subunit 4  
ex subunit 5, mitochondrial  
ex subunit 6  
ex subunit 7  
ex subunit 9

itochondrial  
in 2, mitochondrial  
in 3, mitochondrial  
in 4, mitochondrial  
in 5  
in 6, mitochondrial  
in 7, mitochondrial

in 8, mitochondrial  
mitochondrial  
mitochondrial  
mitochondrial

drial

n

3]

3-beta

nit 5

mitochondrial

ns protein 2  
ilpha  
eta

e

ynthase 2

rotein 1

il

ndrial  
rase

a, somatic form, mitochondrial  
, mitochondrial  
chondrial

ε isozyme 2, mitochondrial  
ε isozyme 3, mitochondrial

phatase 1, mitochondrial

ng protein 1

!

3

nent 1  
nent 2

in 1

in

1

ha

sterase beta-1

sterase beta-3

sterase delta-1

PABC3

alytic subunit  
lytic subunit  
atalytic subunit

ubunit alpha isoform  
ulatory subunit A alpha isoform  
ulatory subunit B alpha isoform

ulatory subunit alpha isoform  
ulatory subunit gamma isoform  
unit  
ubunit 3

ndrial

ra-1  
ha

ory subunit  
:ory subunit  
ory subunit

it protein kinase activator A

otein

rotein 1



3, mitochondrial





ransferase subunit 1  
ransferase subunit 2

itein

olog

protein 3  
subunit, mitochondrial  
bunit, mitochondrial  
mitochondrial  
small subunit, mitochondrial

n 1

n

ring protein alpha

1

:-1

· member 1

regulator of chromatin subfamily A member 5





se

ransferase subunit STT3A  
ransferase subunit STT3B

chondrial  
i, mitochondrial  
chondrial

t 1 protein  
h3

ubunit Tim13  
ubunit TIM44  
ubunit TIM50

rotein 1  
.0  
:  
|

a/epsilon/gamma  
a

}

log

mber 3

ike protein

tein 1

trial

5

tein A  
tein B

ke

.

rotein 1

log

nolog

A  
B2
